# Supplementary material
Source: Research Square preprint supplement (doi:10.21203/rs.3.rs-8958382/v1)
Supplement: Supplementary file 1 [file 003a80b6cb8e61f6df7497d2.xlsx]

## Sheet: cucumibius
s	COG_category	Description	Preferred_name	GOs	EC	KEGG_ko	PFAMs
g11653.t1	T	Ste ste20 ysk protein kinase	-	GO:0000166,GO:0000910,GO:0001932,GO:0001934,GO:0003674,GO:0003824,GO:0004672,GO:0004674,GO:0005488,GO:0005524,GO:0005575,GO:0005622,GO:0005623,GO:0005737,GO:0005815,GO:0005816,GO:0005856,GO:0006464,GO:0006468,GO:0006793,GO:0006796,GO:0006807,GO:0006950,GO:0007049,GO:0007088,GO:0007096,GO:0007154,GO:0007165,GO:0007264,GO:0007265,GO:0007346,GO:0008144,GO:0008150,GO:0008152,GO:0009893,GO:0009987,GO:…	1.1.99.40,2.7.11.1	ko:K08286,ko:K08838,ko:K21618	DUF4048,FAD-oxidase_C,FAD_binding_4,Glyco_transf_22,Lectin_legB,Peptidase_S24,Pkinase,RhoGEF,Transglut_core
g11654.t1	T	Serine/Threonine protein kinases, catalytic domain	STK24	GO:0000139,GO:0000165,GO:0000166,GO:0000185,GO:0000287,GO:0000302,GO:0000902,GO:0001932,GO:0001933,GO:0001934,GO:0002009,GO:0003674,GO:0003824,GO:0004672,GO:0004674,GO:0005488,GO:0005515,GO:0005524,GO:0005575,GO:0005622,GO:0005623,GO:0005634,GO:0005654,GO:0005730,GO:0005737,GO:0005794,GO:0005798,GO:0005829,GO:0005856,GO:0005886,GO:0006464,GO:0006468,GO:0006469,GO:0006793,GO:0006796,GO:0006807,GO:…	2.7.11.1	ko:K08838	DUF1241,DnaJ,Hat1_N,PLDc_2,Pkinase,zf-C2H2_jaz
g11655.t1	T	Serine/Threonine protein kinases, catalytic domain	STK24	GO:0000139,GO:0000165,GO:0000166,GO:0000185,GO:0000287,GO:0000302,GO:0000902,GO:0001932,GO:0001933,GO:0001934,GO:0002009,GO:0003674,GO:0003824,GO:0004672,GO:0004674,GO:0005488,GO:0005515,GO:0005524,GO:0005575,GO:0005622,GO:0005623,GO:0005634,GO:0005654,GO:0005730,GO:0005737,GO:0005794,GO:0005798,GO:0005829,GO:0005856,GO:0005886,GO:0006464,GO:0006468,GO:0006469,GO:0006793,GO:0006796,GO:0006807,GO:…	2.7.11.1	ko:K08838	DUF1241,Hat1_N,PLDc_2,Pkinase
g11659.t1	S	MAP kinase kinase kinase activity	-	-	2.7.11.25	ko:K04421,ko:K20717	PB1,Pkinase
g11660.t1	T	calcium ion binding	SVEP1	GO:0003674,GO:0003682,GO:0005488,GO:0005575,GO:0005576	-	ko:K17495	EGF,EGF_2,EGF_3,EGF_CA,Ephrin_rec_like,F5_F8_type_C,FXa_inhibition,HYR,Kazal_2,Kunitz_BPTI,Laminin_G_3,Lectin_C,PAN_3,Pentaxin,Rep-A_N,Sushi,VWA,hEGF
g11661.t1	T	mitogen-activated protein kinase	tmk1	GO:0000003,GO:0000165,GO:0000166,GO:0000278,GO:0000302,GO:0000746,GO:0000747,GO:0000749,GO:0000750,GO:0001402,GO:0001403,GO:0001556,GO:0001654,GO:0001745,GO:0001751,GO:0001752,GO:0001754,GO:0001932,GO:0001933,GO:0002009,GO:0002119,GO:0002164,GO:0002165,GO:0002252,GO:0002376,GO:0002831,GO:0002833,GO:0003002,GO:0003006,GO:0003674,GO:0003824,GO:0004672,GO:0004674,GO:0004707,GO:0005488,GO:0005515,GO:…	2.7.11.24	ko:K04371	Pkinase
g11662.t1	T	protein kinase activity	NEK8	GO:0001655,GO:0001822,GO:0001947,GO:0002009,GO:0003007,GO:0003143,GO:0005575,GO:0005623,GO:0005929,GO:0007275,GO:0007368,GO:0007389,GO:0007507,GO:0008150,GO:0009653,GO:0009790,GO:0009799,GO:0009855,GO:0009887,GO:0009888,GO:0009966,GO:0010646,GO:0023051,GO:0032501,GO:0032502,GO:0035050,GO:0035239,GO:0035295,GO:0035330,GO:0042995,GO:0043226,GO:0044422,GO:0044441,GO:0044463,GO:0044464,GO:0048513,GO:…	2.7.11.1	ko:K08857,ko:K20877,ko:K20879,ko:K20880	Dimer_Tnp_hAT,Pkinase,RCC1,RCC1_2
g12414.t1	T	Protein tyrosine kinase	BCK1	GO:0000165,GO:0000166,GO:0000186,GO:0000935,GO:0001932,GO:0001934,GO:0003674,GO:0003824,GO:0004672,GO:0004674,GO:0004709,GO:0005488,GO:0005524,GO:0005575,GO:0005622,GO:0005623,GO:0005737,GO:0005933,GO:0005935,GO:0005937,GO:0006464,GO:0006468,GO:0006793,GO:0006796,GO:0006807,GO:0006914,GO:0006950,GO:0006986,GO:0007154,GO:0007163,GO:0007165,GO:0007346,GO:0007584,GO:0008144,GO:0008150,GO:0008152,GO:…	2.7.11.25	ko:K11229	DUF3631,Pkinase,Ras_bdg_2,SAM_2
g12415.t1	T	Serine/Threonine protein kinases, catalytic domain	MAP3K4	GO:0000003,GO:0000131,GO:0000160,GO:0000161,GO:0000165,GO:0000166,GO:0000186,GO:0001672,GO:0001708,GO:0001890,GO:0001932,GO:0001934,GO:0002251,GO:0002376,GO:0002385,GO:0003002,GO:0003006,GO:0003674,GO:0003779,GO:0003824,GO:0004672,GO:0004674,GO:0004690,GO:0004691,GO:0004709,GO:0004713,GO:0005488,GO:0005515,GO:0005524,GO:0005575,GO:0005622,GO:0005623,GO:0005737,GO:0005829,GO:0005933,GO:0005934,GO:…	2.7.11.25	ko:K04428,ko:K11230	CCDC142,CHCH,FNIP,MATH,PAS,Pkinase
g12418.t1	T	It is involved in the biological process described with	-	GO:0003674,GO:0003824,GO:0004383,GO:0005575,GO:0005622,GO:0005623,GO:0005737,GO:0005829,GO:0005886,GO:0005887,GO:0006139,GO:0006163,GO:0006164,GO:0006182,GO:0006725,GO:0006753,GO:0006793,GO:0006796,GO:0006807,GO:0007154,GO:0007165,GO:0008074,GO:0008150,GO:0008152,GO:0009058,GO:0009117,GO:0009150,GO:0009152,GO:0009165,GO:0009187,GO:0009190,GO:0009259,GO:0009260,GO:0009975,GO:0009987,GO:0016020,GO:…	4.6.1.2	ko:K12323,ko:K12324	ANF_receptor,Ank_2,Guanylate_cyc,HNOBA,Pkinase,Pkinase_Tyr
g12419.t1	T	natriuretic peptide receptor activity	NPR2	GO:0000003,GO:0000166,GO:0001501,GO:0001558,GO:0001653,GO:0001882,GO:0001883,GO:0003008,GO:0003013,GO:0003014,GO:0003018,GO:0003674,GO:0003824,GO:0004383,GO:0004888,GO:0004930,GO:0005488,GO:0005515,GO:0005524,GO:0005525,GO:0005575,GO:0005622,GO:0005623,GO:0005737,GO:0005829,GO:0005886,GO:0005887,GO:0006139,GO:0006163,GO:0006164,GO:0006182,GO:0006584,GO:0006725,GO:0006753,GO:0006793,GO:0006796,GO:…	4.6.1.2	ko:K12323,ko:K12324,ko:K12325,ko:K13140	ANF_receptor,Dimer_Tnp_hAT,Guanylate_cyc,HNOBA,Ints3,Pkinase,Pkinase_Tyr
g12582.t1	S	XK-related protein	XKR6	GO:0003674,GO:0005215,GO:0005575,GO:0005623,GO:0005886,GO:0006810,GO:0006897,GO:0006909,GO:0006911,GO:0006915,GO:0007009,GO:0007275,GO:0008150,GO:0008219,GO:0009790,GO:0009792,GO:0009987,GO:0010256,GO:0010324,GO:0012501,GO:0016020,GO:0016043,GO:0016192,GO:0017121,GO:0032501,GO:0032502,GO:0043277,GO:0043652,GO:0044464,GO:0048856,GO:0051179,GO:0051234,GO:0061024,GO:0065007,GO:0065008,GO:0070782,GO:…	-	-	XK-related
g12583.t1	S	XK-related protein	XKR6	GO:0003674,GO:0005215,GO:0005575,GO:0005623,GO:0005886,GO:0006810,GO:0006897,GO:0006909,GO:0006911,GO:0006915,GO:0007009,GO:0007275,GO:0008150,GO:0008219,GO:0009790,GO:0009792,GO:0009987,GO:0010256,GO:0010324,GO:0012501,GO:0016020,GO:0016043,GO:0016192,GO:0017121,GO:0032501,GO:0032502,GO:0043277,GO:0043652,GO:0044464,GO:0048856,GO:0051179,GO:0051234,GO:0061024,GO:0065007,GO:0065008,GO:0070782,GO:…	-	-	XK-related
g12584.t1	-	-	-	-	-	-	EF-hand_5,EF-hand_6,EF-hand_7
g13111.t1	T	Adenylyl- / guanylyl cyclase, catalytic domain	-	-	4.6.1.2	ko:K12323,ko:K12324	ANF_receptor,Guanylate_cyc,Pkinase_Tyr
g13111.t2	T	Adenylyl- / guanylyl cyclase, catalytic domain	-	-	4.6.1.2	ko:K12323,ko:K12324	ANF_receptor,Guanylate_cyc,Pkinase_Tyr
g13112.t1	T	natriuretic peptide receptor activity	NPR1	GO:0000166,GO:0001558,GO:0001653,GO:0001882,GO:0001883,GO:0003008,GO:0003013,GO:0003014,GO:0003018,GO:0003674,GO:0003824,GO:0004383,GO:0004888,GO:0004930,GO:0005488,GO:0005515,GO:0005525,GO:0005575,GO:0005622,GO:0005623,GO:0005737,GO:0005829,GO:0005886,GO:0005887,GO:0006139,GO:0006163,GO:0006164,GO:0006182,GO:0006584,GO:0006725,GO:0006753,GO:0006793,GO:0006796,GO:0006807,GO:0006810,GO:0006935,GO:…	4.6.1.2	ko:K12323,ko:K12324,ko:K12325	ANF_receptor,Dimer_Tnp_hAT,Guanylate_cyc,HNOBA,Pkinase,Pkinase_Tyr
g13113.t1	S	Zona pellucida (ZP) domain	-	GO:0000902,GO:0000904,GO:0002064,GO:0003382,GO:0005575,GO:0008150,GO:0009653,GO:0009888,GO:0009987,GO:0016020,GO:0016021,GO:0016043,GO:0030154,GO:0030855,GO:0031224,GO:0032502,GO:0032989,GO:0044425,GO:0048468,GO:0048856,GO:0048869,GO:0060429,GO:0071840	-	-	Zona_pellucida
g13113.t2	S	Zona pellucida (ZP) domain	-	GO:0000902,GO:0000904,GO:0002064,GO:0003382,GO:0005575,GO:0008150,GO:0009653,GO:0009888,GO:0009987,GO:0016020,GO:0016021,GO:0016043,GO:0030154,GO:0030855,GO:0031224,GO:0032502,GO:0032989,GO:0044425,GO:0048468,GO:0048856,GO:0048869,GO:0060429,GO:0071840	-	-	Zona_pellucida
g13114.t1	T	Natriuretic peptide receptor	NPR1	GO:0000166,GO:0001558,GO:0001653,GO:0001882,GO:0001883,GO:0003008,GO:0003013,GO:0003014,GO:0003018,GO:0003674,GO:0003824,GO:0004383,GO:0004888,GO:0004930,GO:0005488,GO:0005515,GO:0005525,GO:0005575,GO:0005622,GO:0005623,GO:0005737,GO:0005829,GO:0005886,GO:0005887,GO:0006139,GO:0006163,GO:0006164,GO:0006182,GO:0006584,GO:0006725,GO:0006753,GO:0006793,GO:0006796,GO:0006807,GO:0006810,GO:0006935,GO:…	4.6.1.2	ko:K12323,ko:K12324,ko:K12325,ko:K13140	ANF_receptor,Dimer_Tnp_hAT,Guanylate_cyc,HNOBA,Ints3,Pkinase,Pkinase_Tyr
g13115.t1	F	Involved in maintaining the homeostasis of cellular nucleotides by catalyzing the interconversion of nucleoside phosphates. Has GTP AMP phosphotransferase and ITP AMP phosphotransferase activities	ADK2	GO:0001889,GO:0003674,GO:0003824,GO:0004017,GO:0005488,GO:0005515,GO:0005575,GO:0005622,GO:0005623,GO:0005737,GO:0005739,GO:0005740,GO:0005743,GO:0005758,GO:0005759,GO:0006139,GO:0006163,GO:0006164,GO:0006172,GO:0006213,GO:0006220,GO:0006725,GO:0006753,GO:0006754,GO:0006756,GO:0006793,GO:0006796,GO:0006807,GO:0006950,GO:0007275,GO:0007399,GO:0007417,GO:0007420,GO:0007517,GO:0007596,GO:0007599,GO:…	2.7.4.10,2.7.4.3	ko:K00939,ko:K00944	ADK,ADK_lid,CP12
g13116.t1	S	chitin binding. It is involved in the biological process described with chitin metabolic process	-	-	-	-	CBM_14
g14044.t1	S	Leucine-rich repeats, typical (most populated) subfamily	-	GO:0000902,GO:0000904,GO:0001558,GO:0002020,GO:0003674,GO:0005488,GO:0005515,GO:0005575,GO:0005623,GO:0005886,GO:0006928,GO:0006935,GO:0007275,GO:0007399,GO:0007423,GO:0007444,GO:0008037,GO:0008038,GO:0008056,GO:0008150,GO:0009605,GO:0009653,GO:0009888,GO:0009987,GO:0010720,GO:0010769,GO:0010770,GO:0010975,GO:0010976,GO:0016020,GO:0016043,GO:0016358,GO:0019899,GO:0022008,GO:0022603,GO:0022604,GO:…	-	ko:K13023	LRR_6,LRR_8
g14046.t1	A	translation activator activity	BOLL	GO:0000003,GO:0003674,GO:0003676,GO:0003723,GO:0003729,GO:0003730,GO:0005488,GO:0005575,GO:0005622,GO:0005623,GO:0005634,GO:0005737,GO:0006417,GO:0006446,GO:0007049,GO:0007276,GO:0007283,GO:0007610,GO:0007617,GO:0007618,GO:0008150,GO:0008315,GO:0008494,GO:0009889,GO:0009891,GO:0009892,GO:0009893,GO:0009894,GO:0009895,GO:0009987,GO:0010468,GO:0010556,GO:0010557,GO:0010604,GO:0010605,GO:0010608,GO:…	-	-	HLH,RRM_1
g14047.t1	T	Cysteine-rich receptor-like protein kinase	-	-	-	-	Motile_Sperm,PRIMA1,Pkinase,Pkinase_Tyr,Stress-antifung
g14568.t1	S	Uncharacterised protein family UPF0542	SMIM15	-	-	-	UPF0542
g14569.t1	S	Gamma-glutamylamine cyclotransferase	GGACT	GO:0003674,GO:0003824,GO:0005198,GO:0006807,GO:0007275,GO:0007507,GO:0008150,GO:0008152,GO:0008307,GO:0009056,GO:0009628,GO:0016829,GO:0016840,GO:0016842,GO:0032501,GO:0032502,GO:0042219,GO:0048513,GO:0048731,GO:0048856,GO:0050896,GO:0061929,GO:0071704,GO:0072359,GO:0080167,GO:1901564,GO:1901565,GO:1901575	-	ko:K19761	ERM,FERM_C,FERM_M,FERM_N,GGACT,MAM33,SCAI
g14571.t1	K	PAS domain	NPAS4	GO:0000976,GO:0000977,GO:0000978,GO:0000981,GO:0000982,GO:0000987,GO:0001012,GO:0001067,GO:0001077,GO:0001228,GO:0001568,GO:0001667,GO:0001763,GO:0001944,GO:0002009,GO:0002165,GO:0003002,GO:0003008,GO:0003674,GO:0003676,GO:0003677,GO:0003690,GO:0003700,GO:0005488,GO:0005515,GO:0005575,GO:0005622,GO:0005623,GO:0005634,GO:0005667,GO:0006139,GO:0006351,GO:0006355,GO:0006357,GO:0006366,GO:0006725,GO:…	-	-	HLH,PAS,PAS_11,PAS_3,PAS_9
g14619.t1	T	Ferric-chelate reductase 1	FRRS1	GO:0000293,GO:0003674,GO:0003824,GO:0005575,GO:0008150,GO:0008152,GO:0016020,GO:0016021,GO:0016491,GO:0016722,GO:0016723,GO:0031224,GO:0044425,GO:0055114	-	ko:K10436	An_peroxidase,CDH-cyt,CUB,Cyt-b5,Cytochrom_B561,DOMON,DUF2427,EB1,FAD_binding_6,HATPase_c,HisKA,PAS_9,Reeler,Response_reg,SH3_1,VWA
g14621.t1	T	Mitogen-activated protein kinase kinase kinase	-	GO:0000165,GO:0000186,GO:0001101,GO:0001932,GO:0001934,GO:0003674,GO:0003676,GO:0003677,GO:0003700,GO:0003824,GO:0004672,GO:0004674,GO:0004709,GO:0005488,GO:0005515,GO:0005575,GO:0005622,GO:0005623,GO:0005634,GO:0005737,GO:0005768,GO:0005886,GO:0006355,GO:0006464,GO:0006468,GO:0006793,GO:0006796,GO:0006807,GO:0006950,GO:0006970,GO:0007154,GO:0007165,GO:0007275,GO:0007346,GO:0007584,GO:0008150,GO:…	2.7.11.25	ko:K13414,ko:K20605	Calmodulin_bind,LRR_3,NB-ARC,PAH,Pkinase,TIR,WRKY
g14796.t1	-	-	-	-	-	-	F-box,F-box-like
g14798.t1	T	Protein tyrosine kinase	-	-	2.7.11.1,2.7.11.25	ko:K04420,ko:K08269,ko:K08857,ko:K13412	EF-hand_1,EF-hand_5,EF-hand_7,Pkinase
g14799.t1	T	Ste ste20 ysk protein kinase	KIC1	GO:0000003,GO:0000131,GO:0000165,GO:0000185,GO:0000902,GO:0001932,GO:0001934,GO:0003674,GO:0003824,GO:0004672,GO:0004674,GO:0005488,GO:0005515,GO:0005575,GO:0005622,GO:0005623,GO:0005737,GO:0005815,GO:0005816,GO:0005826,GO:0005856,GO:0005933,GO:0005937,GO:0005938,GO:0006464,GO:0006468,GO:0006793,GO:0006796,GO:0006807,GO:0006950,GO:0006996,GO:0007010,GO:0007114,GO:0007117,GO:0007118,GO:0007154,GO:…	2.7.11.1	ko:K08286,ko:K08838	DnaJ,Glyco_transf_22,HGTP_anticodon,Myosin_TH1,Myosin_head,Pkinase,Pkinase_Tyr,SH3_1,tRNA-synt_His,zf-C2H2_jaz
g15157.t1	-	-	-	-	-	-	7TM_GPCR_Srw,DNA_pol_B_2
g15287.t1	P	sulfuric ester hydrolase activity. It is involved in the biological process described with metabolic process	-	-	3.1.6.12	ko:K01135	7TM_GPCR_Srx,C2,Sulfatase,Sulfatase_C
g15288.t1	I	It is involved in the biological process described with lipid metabolic process	PLA2G6	GO:0000003,GO:0001932,GO:0001934,GO:0002252,GO:0002253,GO:0002376,GO:0002429,GO:0002431,GO:0002433,GO:0002682,GO:0002684,GO:0002757,GO:0002764,GO:0002768,GO:0002791,GO:0002793,GO:0003008,GO:0003012,GO:0003013,GO:0003018,GO:0003674,GO:0003824,GO:0004620,GO:0004623,GO:0005488,GO:0005515,GO:0005575,GO:0005576,GO:0005615,GO:0005622,GO:0005623,GO:0005737,GO:0005739,GO:0005740,GO:0005743,GO:0005815,GO:…	3.1.1.4	ko:K16343	Ank,Ank_2,Ank_3,Ank_4,Ank_5,Arfaptin,DUF3447,DUF642,ICA69,Patatin,UPF0561
g15289.t1	I	positive regulation of sphingolipid biosynthetic process	PLA2G6	GO:0000003,GO:0001932,GO:0001934,GO:0002252,GO:0002253,GO:0002376,GO:0002429,GO:0002431,GO:0002433,GO:0002682,GO:0002684,GO:0002757,GO:0002764,GO:0002768,GO:0002791,GO:0002793,GO:0003008,GO:0003012,GO:0003013,GO:0003018,GO:0003674,GO:0003824,GO:0004620,GO:0004623,GO:0005488,GO:0005515,GO:0005575,GO:0005576,GO:0005615,GO:0005622,GO:0005623,GO:0005737,GO:0005739,GO:0005740,GO:0005743,GO:0005815,GO:…	3.1.1.4	ko:K16343	Ank,Ank_2,Ank_3,Ank_4,Ank_5,Arfaptin,DUF3447,DUF642,ICA69,Patatin,UPF0561
g15290.t1	O	ubiquitin-conjugating enzyme	UBE2B	GO:0000003,GO:0000018,GO:0000075,GO:0000077,GO:0000151,GO:0000209,GO:0000226,GO:0000228,GO:0000278,GO:0000280,GO:0000422,GO:0000722,GO:0000723,GO:0000724,GO:0000725,GO:0000731,GO:0000785,GO:0000790,GO:0000792,GO:0000803,GO:0001578,GO:0001666,GO:0001701,GO:0001741,GO:0001932,GO:0001933,GO:0002039,GO:0003006,GO:0003674,GO:0003824,GO:0004842,GO:0005488,GO:0005515,GO:0005575,GO:0005622,GO:0005623,GO:…	2.3.2.23	ko:K10573,ko:K10574	UQ_con
g15300.t1	Z	Dynein light chain type 1	DYN2	GO:0000003,GO:0000226,GO:0000278,GO:0000280,GO:0000743,GO:0000746,GO:0000747,GO:0003006,GO:0003674,GO:0005488,GO:0005515,GO:0005575,GO:0005622,GO:0005623,GO:0005634,GO:0005737,GO:0005815,GO:0005816,GO:0005856,GO:0005868,GO:0005874,GO:0005875,GO:0005881,GO:0006810,GO:0006928,GO:0006996,GO:0006997,GO:0006999,GO:0007010,GO:0007017,GO:0007018,GO:0007049,GO:0007097,GO:0007127,GO:0008092,GO:0008150,GO:…	-	ko:K10418	Dynein_light,Mem_trans,PINIT,zf-MIZ
g15734.t1	T	It is involved in the biological process described with	-	GO:0003674,GO:0003824,GO:0004383,GO:0005575,GO:0005622,GO:0005623,GO:0005737,GO:0005829,GO:0005886,GO:0005887,GO:0006139,GO:0006163,GO:0006164,GO:0006182,GO:0006725,GO:0006753,GO:0006793,GO:0006796,GO:0006807,GO:0007154,GO:0007165,GO:0008074,GO:0008150,GO:0008152,GO:0009058,GO:0009117,GO:0009150,GO:0009152,GO:0009165,GO:0009187,GO:0009190,GO:0009259,GO:0009260,GO:0009975,GO:0009987,GO:0016020,GO:…	4.6.1.2	ko:K12323,ko:K12324	ANF_receptor,Ank_2,Guanylate_cyc,HNOBA,Pkinase,Pkinase_Tyr
g15735.t1	S	Lytic transglycolase	DAG7	-	-	-	DPBB_1,LysM
g15736.t1	E	serine-type endopeptidase activity. It is involved in the biological process described with proteolysis	-	GO:0000003,GO:0001775,GO:0002064,GO:0002065,GO:0002066,GO:0003002,GO:0003006,GO:0003674,GO:0003824,GO:0004175,GO:0004252,GO:0006508,GO:0006807,GO:0007154,GO:0007165,GO:0007166,GO:0007275,GO:0007276,GO:0007281,GO:0007292,GO:0007304,GO:0007306,GO:0007308,GO:0007309,GO:0007310,GO:0007338,GO:0007343,GO:0007389,GO:0008063,GO:0008150,GO:0008152,GO:0008233,GO:0008236,GO:0009566,GO:0009653,GO:0009798,GO:…	-	ko:K09631	DUF1986,Ldl_recept_a,Trypsin
g15748.t1	O	Belongs to the ubiquitin-conjugating enzyme family	UBE2L3	GO:0000209,GO:0003674,GO:0003824,GO:0004842,GO:0005488,GO:0005515,GO:0006464,GO:0006807,GO:0008150,GO:0008152,GO:0009987,GO:0016567,GO:0016740,GO:0019538,GO:0019787,GO:0019899,GO:0031625,GO:0032446,GO:0036211,GO:0043170,GO:0043412,GO:0044237,GO:0044238,GO:0044260,GO:0044267,GO:0044389,GO:0061631,GO:0061650,GO:0070647,GO:0071704,GO:0097039,GO:0140096,GO:1901564	2.3.2.23	ko:K04552	UQ_con
g15750.t1	E	Belongs to the peptidase S1 family	-	-	3.4.21.4	ko:K01312	Trypsin
g526.t1	T	It is involved in the biological process described with	-	GO:0003674,GO:0003824,GO:0004383,GO:0005575,GO:0005622,GO:0005623,GO:0005737,GO:0005829,GO:0005886,GO:0005887,GO:0006139,GO:0006163,GO:0006164,GO:0006182,GO:0006725,GO:0006753,GO:0006793,GO:0006796,GO:0006807,GO:0007154,GO:0007165,GO:0008074,GO:0008150,GO:0008152,GO:0009058,GO:0009117,GO:0009150,GO:0009152,GO:0009165,GO:0009187,GO:0009190,GO:0009259,GO:0009260,GO:0009975,GO:0009987,GO:0016020,GO:…	4.6.1.2	ko:K12323,ko:K12324	ANF_receptor,Ank_2,Guanylate_cyc,HNOBA,Pkinase,Pkinase_Tyr
g701.t1	T	Adenylyl- / guanylyl cyclase, catalytic domain	-	GO:0003674,GO:0003824,GO:0004383,GO:0005575,GO:0005622,GO:0005623,GO:0005737,GO:0005829,GO:0005886,GO:0005887,GO:0006139,GO:0006163,GO:0006164,GO:0006182,GO:0006725,GO:0006753,GO:0006793,GO:0006796,GO:0006807,GO:0007154,GO:0007165,GO:0008074,GO:0008150,GO:0008152,GO:0009058,GO:0009117,GO:0009150,GO:0009152,GO:0009165,GO:0009187,GO:0009190,GO:0009259,GO:0009260,GO:0009975,GO:0009987,GO:0016020,GO:…	4.6.1.2	ko:K12323,ko:K12324	ANF_receptor,Ank_2,Guanylate_cyc,HNOBA,Pkinase,Pkinase_Tyr
g702.t1	T	It is involved in the biological process described with	-	GO:0003674,GO:0003824,GO:0004383,GO:0005575,GO:0005622,GO:0005623,GO:0005737,GO:0005829,GO:0005886,GO:0005887,GO:0006139,GO:0006163,GO:0006164,GO:0006182,GO:0006725,GO:0006753,GO:0006793,GO:0006796,GO:0006807,GO:0007154,GO:0007165,GO:0008074,GO:0008150,GO:0008152,GO:0009058,GO:0009117,GO:0009150,GO:0009152,GO:0009165,GO:0009187,GO:0009190,GO:0009259,GO:0009260,GO:0009975,GO:0009987,GO:0016020,GO:…	4.6.1.2	ko:K01769,ko:K12323,ko:K16573	ANF_receptor,Guanylate_cyc,HNOBA,Pkinase_Tyr,Spc97_Spc98
g780.t1	T	Mitogen-activated protein kinase kinase kinase	-	GO:0001932,GO:0001934,GO:0003674,GO:0003824,GO:0004672,GO:0004674,GO:0005575,GO:0005622,GO:0005623,GO:0005737,GO:0005938,GO:0006464,GO:0006468,GO:0006793,GO:0006796,GO:0006807,GO:0006950,GO:0007154,GO:0007165,GO:0007346,GO:0008150,GO:0008152,GO:0009653,GO:0009893,GO:0009987,GO:0010562,GO:0010604,GO:0016301,GO:0016310,GO:0016740,GO:0016772,GO:0016773,GO:0019220,GO:0019222,GO:0019538,GO:0023014,GO:…	-	ko:K20716	Pkinase
g781.t1	O	Zinc-dependent metalloprotease	MEP1B	GO:0003674,GO:0003824,GO:0004175,GO:0004222,GO:0005488,GO:0005515,GO:0005575,GO:0005576,GO:0005615,GO:0005623,GO:0005886,GO:0005887,GO:0006508,GO:0006807,GO:0006810,GO:0008150,GO:0008152,GO:0008233,GO:0008237,GO:0016020,GO:0016021,GO:0016787,GO:0017090,GO:0019538,GO:0031224,GO:0031226,GO:0032991,GO:0042802,GO:0043170,GO:0044238,GO:0044421,GO:0044425,GO:0044459,GO:0044464,GO:0051179,GO:0051234,GO:…	3.4.24.18,3.4.24.63	ko:K01395,ko:K08606,ko:K08778	Astacin,DUF1891,EGF,Histone,Kringle,Ldl_recept_a,Lectin_C,MAM,Methyltransf_FA,ShK,TSP_1,VCBS,VWD
g1259.t1	V	Membrane-associating domain	-	GO:0005575,GO:0016020,GO:0016021,GO:0031224,GO:0044425	-	-	MARVEL
g1420.t1	O	Zinc-dependent metalloprotease	mep1b	GO:0006810,GO:0006897,GO:0006909,GO:0008150,GO:0016192,GO:0051179,GO:0051234,GO:0098657	3.4.24.63	ko:K08606	Arf,Astacin,DUF1891,MAM
g1521.t1	S	G-protein coupled receptor activity. It is involved in the biological process described with G-protein coupled receptor signaling pathway	-	GO:0000003,GO:0003006,GO:0003674,GO:0004888,GO:0004930,GO:0005575,GO:0005622,GO:0005623,GO:0005737,GO:0005938,GO:0006928,GO:0007154,GO:0007165,GO:0007186,GO:0007276,GO:0007280,GO:0007281,GO:0008150,GO:0008219,GO:0008354,GO:0009987,GO:0010623,GO:0012501,GO:0016020,GO:0016021,GO:0016477,GO:0019953,GO:0022412,GO:0022414,GO:0023052,GO:0030154,GO:0031224,GO:0032501,GO:0032502,GO:0032504,GO:0035234,GO:…	-	ko:K04163,ko:K04250,ko:K04255,ko:K04256,ko:K04285,ko:K04286	7tm_1
g1523.t1	E	Ribonuclease H protein	-	-	2.1.1.43,2.3.2.26	ko:K09186,ko:K10592	AAA,Aldo_ket_red,Auxin_resp,BLM10_mid,CBM_14,CUB,Candida_ALS,Candida_ALS_N,DNMT1-RFD,DRIM,DUF3437,DUF4283,DUF4414,DUF908,DUF913,EDR1,Exo_endo_phos,FH2,FYRC,FYRN,HECT,Hyphal_reg_CWP,PI3_PI4_kinase,Pkinase,RVT_1,RVT_3,Root_cap,SET,UBA,WWE,zf-CCHC_4,zf-HC5HC2H
g1768.t1	U	WAS protein family homolog	WASHC1	GO:0000003,GO:0000212,GO:0000226,GO:0000280,GO:0000323,GO:0000910,GO:0001556,GO:0001578,GO:0001775,GO:0002165,GO:0002376,GO:0002468,GO:0002682,GO:0002790,GO:0003006,GO:0003674,GO:0003779,GO:0005102,GO:0005488,GO:0005515,GO:0005575,GO:0005622,GO:0005623,GO:0005634,GO:0005737,GO:0005764,GO:0005767,GO:0005768,GO:0005769,GO:0005773,GO:0005776,GO:0005813,GO:0005815,GO:0005856,GO:0006810,GO:0006873,GO:…	-	ko:K18461	WASH_WAHD,WH2
g1769.t1	S	dendritic cell antigen processing and presentation	WASHC1	GO:0000003,GO:0000212,GO:0000226,GO:0000280,GO:0000323,GO:0000910,GO:0001556,GO:0001578,GO:0001775,GO:0002165,GO:0002376,GO:0002468,GO:0002682,GO:0002790,GO:0003006,GO:0003674,GO:0003779,GO:0005102,GO:0005488,GO:0005515,GO:0005575,GO:0005622,GO:0005623,GO:0005634,GO:0005737,GO:0005764,GO:0005767,GO:0005768,GO:0005769,GO:0005773,GO:0005776,GO:0005813,GO:0005815,GO:0005856,GO:0006810,GO:0006873,GO:…	-	ko:K18461	WASH_WAHD,WH2
g1995.t1	S	Belongs to the G-protein coupled receptor 1 family. Opsin subfamily	-	-	-	ko:K08385	7tm_1
g2052.t1	T	guanylate cyclase activity. It is involved in the biological process described with intracellular signal transduction	-	GO:0003674,GO:0003824,GO:0004383,GO:0005575,GO:0005622,GO:0005623,GO:0005737,GO:0005829,GO:0005886,GO:0005887,GO:0006139,GO:0006163,GO:0006164,GO:0006182,GO:0006725,GO:0006753,GO:0006793,GO:0006796,GO:0006807,GO:0006996,GO:0007030,GO:0007154,GO:0007165,GO:0007346,GO:0008074,GO:0008150,GO:0008152,GO:0008284,GO:0008361,GO:0009058,GO:0009117,GO:0009150,GO:0009152,GO:0009165,GO:0009187,GO:0009190,GO:…	4.6.1.2	ko:K12323	ANF_receptor,Guanylate_cyc,HNOBA,PhoPQ_related,Pkinase,Pkinase_Tyr
g2053.t1	GO	WSC domain-containing protein 1	WSCD1	-	-	-	Sulfotransfer_1,WSC
g2322.t1	O	Low-density lipoprotein receptor domain class A	-	GO:0000003,GO:0001775,GO:0002064,GO:0002065,GO:0002066,GO:0003002,GO:0003006,GO:0003674,GO:0003824,GO:0004175,GO:0004252,GO:0006508,GO:0006807,GO:0007154,GO:0007165,GO:0007166,GO:0007275,GO:0007276,GO:0007281,GO:0007292,GO:0007304,GO:0007306,GO:0007308,GO:0007309,GO:0007310,GO:0007338,GO:0007343,GO:0007389,GO:0008063,GO:0008150,GO:0008152,GO:0008233,GO:0008236,GO:0009566,GO:0009653,GO:0009798,GO:…	-	ko:K09631	DUF1986,Ldl_recept_a,Trypsin
g2360.t1	D	Structural maintenance of chromosomes	SMC1B	GO:0000003,GO:0000070,GO:0000217,GO:0000228,GO:0000278,GO:0000280,GO:0000775,GO:0000776,GO:0000779,GO:0000780,GO:0000785,GO:0000790,GO:0000793,GO:0000794,GO:0000795,GO:0000798,GO:0000800,GO:0000819,GO:0000902,GO:0000904,GO:0000922,GO:0003674,GO:0003676,GO:0003677,GO:0003680,GO:0003682,GO:0003690,GO:0003824,GO:0005215,GO:0005488,GO:0005515,GO:0005575,GO:0005622,GO:0005623,GO:0005634,GO:0005654,GO:…	-	ko:K06636,ko:K19719	AA_kinase,ACT,COLFI,Collagen,DNA_pol_B_palm,DNA_pol_B_thumb,DNA_pol_lambd_f,Disintegrin,Gelsolin,Glycos_transf_2,MFS_2,Reprolysin_4,Ricin_B_lectin,SMC_N,SMC_hinge,Sec23_BS,Sec23_helical,Sec23_trunk,TFIIE_alpha,adh_short
g2362.t1	L	Encoded by	-	-	5.4.2.2	ko:K01835	3HCDH,DUF4413,DUF659,Dimer_Tnp_hAT,PGM_PMM_I,PGM_PMM_II,PGM_PMM_III,PGM_PMM_IV,Polysacc_deac_1,zf-BED,zf-C3HC4_2
g2363.t1	-	-	-	-	-	-	-
g2468.t1	T	Pkinase-domain-containing protein	STE11	GO:0000003,GO:0000161,GO:0000165,GO:0000186,GO:0000196,GO:0000746,GO:0000747,GO:0000749,GO:0000750,GO:0000935,GO:0001402,GO:0001403,GO:0001932,GO:0001934,GO:0003674,GO:0003824,GO:0004672,GO:0004674,GO:0004709,GO:0005488,GO:0005515,GO:0005575,GO:0005622,GO:0005623,GO:0005737,GO:0005886,GO:0006464,GO:0006468,GO:0006793,GO:0006796,GO:0006807,GO:0006950,GO:0006970,GO:0007124,GO:0007154,GO:0007165,GO:…	2.7.11.25	ko:K11228	Kelch_4,PB1,Pkinase,Ras_bdg_2,SAM_1,SAM_2,SPRY
g2600.t1	O	Belongs to the peptidase S1 family	-	-	3.4.21.4	ko:K01312	CUB,Sushi,Trypsin,VWA
g2601.t1	TV	Macrophage mannose receptor 1	MRC1	GO:0002237,GO:0002376,GO:0003674,GO:0004888,GO:0005488,GO:0005537,GO:0005575,GO:0005622,GO:0005623,GO:0005737,GO:0005768,GO:0005886,GO:0005887,GO:0006810,GO:0006897,GO:0006898,GO:0006950,GO:0006952,GO:0006955,GO:0007154,GO:0007165,GO:0008150,GO:0009605,GO:0009607,GO:0009617,GO:0009986,GO:0009987,GO:0010008,GO:0010033,GO:0012505,GO:0016020,GO:0016021,GO:0016192,GO:0023052,GO:0030246,GO:0031090,GO:…	-	ko:K06560	F5_F8_type_C,Gal_Lectin,Kringle,Laminin_G_3,Lectin_C,PAN_1,Ricin_B_lectin,SEA,fn2
g2642.t1	T	Glutamate receptor, ionotropic	GRID2	GO:0001964,GO:0003008,GO:0003674,GO:0004888,GO:0005488,GO:0005515,GO:0005575,GO:0005623,GO:0005886,GO:0005887,GO:0007154,GO:0007155,GO:0007157,GO:0007165,GO:0007166,GO:0007215,GO:0007267,GO:0007268,GO:0007275,GO:0007399,GO:0007416,GO:0007417,GO:0007420,GO:0008066,GO:0008104,GO:0008150,GO:0008328,GO:0009605,GO:0009653,GO:0009987,GO:0010646,GO:0010941,GO:0010975,GO:0014069,GO:0016020,GO:0016021,GO:…	-	ko:K05206,ko:K05207	ANF_receptor,Lig_chan,Lig_chan-Glu_bd,RVT_1,SBP_bac_3
g2806.t1	T	guanylate cyclase activity	-	GO:0003674,GO:0003824,GO:0004383,GO:0005575,GO:0005622,GO:0005623,GO:0005737,GO:0005829,GO:0005886,GO:0005887,GO:0006139,GO:0006163,GO:0006164,GO:0006182,GO:0006725,GO:0006753,GO:0006793,GO:0006796,GO:0006807,GO:0007154,GO:0007165,GO:0008074,GO:0008150,GO:0008152,GO:0009058,GO:0009117,GO:0009150,GO:0009152,GO:0009165,GO:0009187,GO:0009190,GO:0009259,GO:0009260,GO:0009975,GO:0009987,GO:0016020,GO:…	4.6.1.2	ko:K12323,ko:K12324	ANF_receptor,Ank_2,Guanylate_cyc,HNOBA,Pkinase,Pkinase_Tyr
g2807.t1	O	Zinc-dependent metalloprotease	-	-	3.4.24.21	ko:K08076	Astacin,CUB,ShK
g3355.t1	S	Eva-1 homolog C	EVA1C	GO:0003674,GO:0005488,GO:0005539,GO:0008201,GO:0043167,GO:0043168,GO:0097367,GO:1901681	-	-	7tm_2,FAM176,GAIN,GPS,Gal_Lectin,HRM,Latrophilin,OLF
g3394.t1	O	Belongs to the peptidase C1 family	-	-	3.4.22.1,3.4.22.15,3.4.22.27,3.4.22.38	ko:K01363,ko:K01365,ko:K01368,ko:K01371	Inhibitor_I29,Peptidase_C1,Propeptide_C1
g3448.t1	O	K02A2.6-like	-	-	3.4.19.12	ko:K11366,ko:K11850,ko:K11854	BESS,BIR,Baculo_F,DUF4371,GatB_N,MADF_DNA_bdg,Macro,OTU,PRE_C2HC,RVP,RVP_2,RVT_1,Retrotrans_gag,UCH,UCH_1,gag-asp_proteas,rve,zf-C2H2,zf-C3HC4_3,zf-CCHC,zf-H2C2
g3611.t1	P	Large conductance calcium-activated potassium channel activity. It is involved in the biological process described with potassium ion transport	KCNMA1	GO:0000003,GO:0001505,GO:0001508,GO:0001666,GO:0002065,GO:0003008,GO:0003012,GO:0003013,GO:0003014,GO:0003018,GO:0003674,GO:0003779,GO:0005215,GO:0005216,GO:0005227,GO:0005244,GO:0005249,GO:0005261,GO:0005267,GO:0005488,GO:0005515,GO:0005575,GO:0005576,GO:0005615,GO:0005622,GO:0005623,GO:0005737,GO:0005783,GO:0005886,GO:0005887,GO:0005901,GO:0006810,GO:0006811,GO:0006812,GO:0006813,GO:0006873,GO:…	-	ko:K04936,ko:K05274	BK_channel_a,Ion_trans,Ion_trans_2,KA1,Pkinase,Ribosomal_60s,TrkA_N
g3744.t1	-	-	-	-	-	-	7TM_GPCR_Srw,DNA_pol_B_2
g3745.t1	S	DNA- binding	-	-	-	-	Herpes_alk_exo,PIF1,Peptidase_C48,YqaJ
g3816.t1	-	-	-	-	-	-	DUF1258,F5_F8_type_C,HTH_23,HTH_29,Transposase_21
g4120.t1	S	DNA topoisomerase binding	-	-	-	-	EloA-BP1,Med26,PHD,Peptidase_C65,SET,zf-C3HC4_2,zf-RING_2
g4121.t1	S	Encoded by	-	-	-	-	DDE_1,DUF1759,DUF4780,HTH_23,HTH_Tnp_Tc5,HTH_psq,Keratin_B2_2
g4148.t1	K	transcription elongation from RNA polymerase II promoter	TCEB3	GO:0002009,GO:0002165,GO:0003002,GO:0003674,GO:0003676,GO:0003677,GO:0003690,GO:0005488,GO:0005575,GO:0005622,GO:0005623,GO:0005634,GO:0005654,GO:0006139,GO:0006351,GO:0006354,GO:0006355,GO:0006357,GO:0006366,GO:0006368,GO:0006508,GO:0006511,GO:0006725,GO:0006807,GO:0007275,GO:0007389,GO:0007444,GO:0007472,GO:0007474,GO:0007476,GO:0007552,GO:0007560,GO:0008023,GO:0008150,GO:0008152,GO:0009056,GO:…	-	ko:K02868,ko:K15076,ko:K15077	Elongin_A,GTP_EFTU_D2,HTH_Tnp_Tc3_2,Med26,Ribosomal_L5,Ribosomal_L5_C,SUR7,eIF2A
g4148.t2	K	transcription elongation from RNA polymerase II promoter	TCEB3	GO:0002009,GO:0002165,GO:0003002,GO:0003674,GO:0003676,GO:0003677,GO:0003690,GO:0005488,GO:0005575,GO:0005622,GO:0005623,GO:0005634,GO:0005654,GO:0006139,GO:0006351,GO:0006354,GO:0006355,GO:0006357,GO:0006366,GO:0006368,GO:0006508,GO:0006511,GO:0006725,GO:0006807,GO:0007275,GO:0007389,GO:0007444,GO:0007472,GO:0007474,GO:0007476,GO:0007552,GO:0007560,GO:0008023,GO:0008150,GO:0008152,GO:0009056,GO:…	-	ko:K02868,ko:K15076,ko:K15077	Elongin_A,GTP_EFTU_D2,HTH_Tnp_Tc3_2,Med26,Ribosomal_L5,Ribosomal_L5_C,SUR7,eIF2A
g4292.t1	K	Histone-lysine N-methyltransferase	KMT2C	GO:0000003,GO:0001654,GO:0002009,GO:0002165,GO:0002682,GO:0003002,GO:0003674,GO:0003682,GO:0003712,GO:0003713,GO:0003824,GO:0005488,GO:0005515,GO:0005575,GO:0005622,GO:0005623,GO:0005634,GO:0005654,GO:0005667,GO:0005694,GO:0005700,GO:0006325,GO:0006355,GO:0006357,GO:0006464,GO:0006479,GO:0006807,GO:0006996,GO:0007154,GO:0007165,GO:0007275,GO:0007338,GO:0007389,GO:0007423,GO:0007444,GO:0007472,GO:…	2.1.1.43	ko:K09188	FYRC,FYRN,HMG_box_2,Ins_P5_2-kin,PHD,SET,zf-HC5HC2H,zf-HC5HC2H_2
g4550.t1	L	zinc finger	-	-	-	-	RVT_1,Retrotrans_gag,gag-asp_proteas,zf-CCHC
g4551.t1	L	zinc finger	-	-	-	-	RVT_1,Retrotrans_gag,gag-asp_proteas,zf-CCHC
g4578.t1	Q	Cytochrome P450, family	-	-	1.14.14.1,1.14.14.19,1.14.14.32	ko:K00512,ko:K07408,ko:K07414	7tm_1,Histone,Myb_DNA-bind_4,p450
g4579.t1	L	Integrase core domain	-	-	-	-	VWA,rve
g4689.t1	T	endocytosis	LRP2	GO:0000003,GO:0000323,GO:0000902,GO:0001101,GO:0001523,GO:0001568,GO:0001838,GO:0001841,GO:0001843,GO:0001944,GO:0002009,GO:0003002,GO:0003006,GO:0003007,GO:0003008,GO:0003128,GO:0003139,GO:0003148,GO:0003151,GO:0003205,GO:0003206,GO:0003208,GO:0003223,GO:0003229,GO:0003231,GO:0003279,GO:0003281,GO:0003674,GO:0005041,GO:0005102,GO:0005215,GO:0005488,GO:0005509,GO:0005515,GO:0005575,GO:0005576,GO:…	-	ko:K06233	3HCDH,3HCDH_N,DUF5050,EGF,EGF_CA,ER,FXa_inhibition,IBN_N,Ldl_recept_a,Ldl_recept_b,Neur_chan_memb,PGAP1,cEGF,zf-C2H2
g4781.t1	S	DNA- binding	-	-	-	-	Herpes_alk_exo,PHD,PIF1,Peptidase_C48,YqaJ
g5152.t1	S	SCAN domain	-	-	-	ko:K09230	RVP,SCAN,gag-asp_proteas,zf-C2H2,zf-CCHC
g5381.t1	T	Ste ste20 ysk protein kinase	STK24	GO:0000139,GO:0000165,GO:0000166,GO:0000185,GO:0000287,GO:0000302,GO:0000902,GO:0001932,GO:0001933,GO:0001934,GO:0002009,GO:0003674,GO:0003824,GO:0004672,GO:0004674,GO:0005488,GO:0005515,GO:0005524,GO:0005575,GO:0005622,GO:0005623,GO:0005634,GO:0005654,GO:0005730,GO:0005737,GO:0005794,GO:0005798,GO:0005829,GO:0005856,GO:0005886,GO:0006464,GO:0006468,GO:0006469,GO:0006793,GO:0006796,GO:0006807,GO:…	2.7.11.1	ko:K08838	DUF1241,Glyco_transf_22,Hat1_N,PLDc_2,Pkinase,Pkinase_Tyr
g5709.t1	B	nucleosome assembly	H1F0	GO:0000228,GO:0000737,GO:0000785,GO:0000786,GO:0000790,GO:0000791,GO:0000793,GO:0000794,GO:0003674,GO:0003676,GO:0003677,GO:0003680,GO:0003682,GO:0003690,GO:0005488,GO:0005575,GO:0005622,GO:0005623,GO:0005634,GO:0005654,GO:0005694,GO:0005719,GO:0005737,GO:0005794,GO:0005856,GO:0006139,GO:0006259,GO:0006308,GO:0006309,GO:0006323,GO:0006325,GO:0006333,GO:0006334,GO:0006725,GO:0006807,GO:0006915,GO:…	-	ko:K11275	Linker_histone
g5727.t1	Z	dynein heavy chain binding	WDR34	GO:0003674,GO:0005488,GO:0005515,GO:0005575,GO:0005622,GO:0005623,GO:0005737,GO:0005814,GO:0005815,GO:0005829,GO:0005856,GO:0005868,GO:0005875,GO:0005929,GO:0005930,GO:0006810,GO:0006928,GO:0006996,GO:0007017,GO:0007018,GO:0008150,GO:0009987,GO:0010970,GO:0015630,GO:0016043,GO:0022607,GO:0030030,GO:0030031,GO:0030286,GO:0030705,GO:0031503,GO:0032838,GO:0032991,GO:0035735,GO:0036064,GO:0042073,GO:…	-	ko:K10409,ko:K10415,ko:K11143	ANAPC4_WD40,Ank,Ank_2,Ank_5,Dynein_IC2,WD40,zf-TRAF
g6016.t1	TU	Eps15 homology domain	ITSN1	GO:0001558,GO:0001932,GO:0001934,GO:0002052,GO:0002791,GO:0002793,GO:0003674,GO:0005070,GO:0005085,GO:0005088,GO:0005089,GO:0005198,GO:0005488,GO:0005509,GO:0005515,GO:0005575,GO:0005622,GO:0005623,GO:0005737,GO:0005813,GO:0005815,GO:0005829,GO:0005856,GO:0005886,GO:0005905,GO:0005938,GO:0006810,GO:0006897,GO:0007154,GO:0007165,GO:0007166,GO:0007167,GO:0007169,GO:0007186,GO:0007264,GO:0007275,GO:…	-	ko:K20045	C2,DUF659,EF-hand_4,INTAP,PH_13,RhoGEF,SH3_1,SH3_2,SH3_9
g6242.t1	L	Conserved hypothetical protein	-	-	-	-	Dimer_Tnp_hAT,zf-BED
g6269.t1	O	calcium ion binding	-	-	-	-	7tm_2,EGF,EGF_CA,Ephrin_rec_like,ILEI,Ldl_recept_a,Ldl_recept_b,MAM,Trefoil,fn2,hEGF
g6436.t1	-	-	-	-	-	-	DUF1258,F5_F8_type_C,Transposase_21
g6680.t1	T	Natriuretic peptide receptor 1	NPR1	GO:0000166,GO:0001558,GO:0001653,GO:0001882,GO:0001883,GO:0003008,GO:0003013,GO:0003014,GO:0003018,GO:0003674,GO:0003824,GO:0004383,GO:0004888,GO:0004930,GO:0005488,GO:0005515,GO:0005525,GO:0005575,GO:0005622,GO:0005623,GO:0005737,GO:0005829,GO:0005886,GO:0005887,GO:0006139,GO:0006163,GO:0006164,GO:0006182,GO:0006584,GO:0006725,GO:0006753,GO:0006793,GO:0006796,GO:0006807,GO:0006810,GO:0006935,GO:…	4.6.1.2	ko:K12323,ko:K12324,ko:K12325	ANF_receptor,Dimer_Tnp_hAT,Guanylate_cyc,HNOBA,Pkinase,Pkinase_Tyr
g6916.t1	O	Baculoviral inhibition of apoptosis protein repeat	IAP1	GO:0000003,GO:0000209,GO:0001667,GO:0002009,GO:0002020,GO:0002064,GO:0002065,GO:0002066,GO:0002165,GO:0003006,GO:0003674,GO:0003824,GO:0004842,GO:0004857,GO:0004866,GO:0004869,GO:0005488,GO:0005515,GO:0005575,GO:0005622,GO:0005623,GO:0005634,GO:0005737,GO:0006464,GO:0006508,GO:0006511,GO:0006807,GO:0006915,GO:0006928,GO:0006996,GO:0006997,GO:0007275,GO:0007276,GO:0007281,GO:0007283,GO:0007286,GO:…	2.3.2.27	ko:K04725,ko:K16060,ko:K16061	BIR,DS,Endonuclease_7,MORN,UCH,USP7_ICP0_bdg,zf-C3HC4_3
g6957.t1	L	transposition, RNA-mediated	-	-	-	-	Baculo_F,Chromo,Pkinase,rve
g6977.t1	P	ZIP Zinc transporter	SLC39A9	GO:0000041,GO:0000139,GO:0003674,GO:0005215,GO:0005384,GO:0005385,GO:0005575,GO:0005622,GO:0005623,GO:0005737,GO:0005768,GO:0005770,GO:0005783,GO:0005794,GO:0005802,GO:0006810,GO:0006811,GO:0006812,GO:0006828,GO:0006829,GO:0006873,GO:0006875,GO:0008150,GO:0008324,GO:0009987,GO:0012505,GO:0015075,GO:0015318,GO:0016020,GO:0016021,GO:0019725,GO:0022857,GO:0022890,GO:0030001,GO:0030003,GO:0030026,GO:…	-	ko:K14715	F-box-like,Grp1_Fun34_YaaH,RCC1_2,RTA1,WD40,Zip
g7209.t1	T	negative regulation of bile acid biosynthetic process	-	-	-	ko:K22453	EGF,Kringle,Ldl_recept_a,MAM,Pkinase_Tyr,Trefoil
g7281.t1	-	-	-	-	-	-	7TM_GPCR_Srw,DNA_pol_B_2
g7391.t1	O	Astacin (Peptidase family M12A)	MEP1B	GO:0003674,GO:0003824,GO:0004175,GO:0004222,GO:0005488,GO:0005515,GO:0005575,GO:0005623,GO:0005886,GO:0005887,GO:0006508,GO:0006807,GO:0006810,GO:0007275,GO:0007610,GO:0007631,GO:0008150,GO:0008152,GO:0008233,GO:0008237,GO:0016020,GO:0016021,GO:0016787,GO:0017090,GO:0019538,GO:0031224,GO:0031226,GO:0032501,GO:0032502,GO:0032991,GO:0035295,GO:0042755,GO:0042802,GO:0043050,GO:0043170,GO:0044238,GO:…	3.4.24.21,3.4.24.63	ko:K08076,ko:K08606	Astacin,EGF,Histone,Kringle,Ldl_recept_a,MAM,ShK,TSP_1,Trypsin
g7462.t1	O	Baculoviral IAP repeat-containing	BIRC7	GO:0000022,GO:0000070,GO:0000075,GO:0000165,GO:0000187,GO:0000209,GO:0000226,GO:0000228,GO:0000278,GO:0000280,GO:0000775,GO:0000776,GO:0000777,GO:0000778,GO:0000779,GO:0000780,GO:0000785,GO:0000790,GO:0000792,GO:0000793,GO:0000794,GO:0000819,GO:0001932,GO:0001934,GO:0002020,GO:0002225,GO:0002682,GO:0002684,GO:0002697,GO:0002699,GO:0002700,GO:0002702,GO:0002759,GO:0002760,GO:0002784,GO:0002786,GO:…	2.3.2.27	ko:K04725,ko:K16060,ko:K16061	AT_hook,BIR,CARD,DS,MORN,NACHT,TBP,UCH,USP7_ICP0_bdg,zf-C3HC4_3
g7620.t1	A	Serine arginine-rich splicing factor	-	GO:0002244,GO:0002376,GO:0002520,GO:0003674,GO:0003676,GO:0003723,GO:0003729,GO:0005488,GO:0005575,GO:0005622,GO:0005623,GO:0005634,GO:0005654,GO:0007275,GO:0008150,GO:0009892,GO:0009987,GO:0010468,GO:0010605,GO:0010629,GO:0016604,GO:0016607,GO:0019219,GO:0019222,GO:0030097,GO:0030154,GO:0031323,GO:0031324,GO:0031974,GO:0031981,GO:0032501,GO:0032502,GO:0033119,GO:0043226,GO:0043227,GO:0043229,GO:…	-	ko:K12896	DUF4779,RRM_1,zf-CCHC
g7657.t1	K	Integrase core domain	-	-	-	-	rve,zf-H2C2
g7693.t1	P	Solute proton antiporter activity. It is involved in the biological process described with transmembrane transport	SLC9B2	GO:0002682,GO:0002684,GO:0002761,GO:0002763,GO:0002790,GO:0002791,GO:0003008,GO:0003014,GO:0003096,GO:0003674,GO:0005215,GO:0005451,GO:0005488,GO:0005515,GO:0005575,GO:0005622,GO:0005623,GO:0005737,GO:0005739,GO:0005740,GO:0005743,GO:0005768,GO:0005794,GO:0005886,GO:0005903,GO:0005929,GO:0006810,GO:0006811,GO:0006812,GO:0006813,GO:0006814,GO:0006820,GO:0006821,GO:0006873,GO:0006885,GO:0006897,GO:…	-	-	Ank_2,Ank_4,Ig_2,Na_H_Exchanger,RRM_1
g7953.t1	H	Holocarboxylase synthetase (biotin-(proprionyl-Coenzyme A-carboxylase (ATP-hydrolysing)) ligase)	HLCS	GO:0000785,GO:0001101,GO:0003674,GO:0003824,GO:0004077,GO:0004080,GO:0005488,GO:0005515,GO:0005575,GO:0005622,GO:0005623,GO:0005634,GO:0005652,GO:0005694,GO:0005700,GO:0005737,GO:0005739,GO:0005829,GO:0006082,GO:0006325,GO:0006464,GO:0006732,GO:0006766,GO:0006767,GO:0006768,GO:0006790,GO:0006807,GO:0006950,GO:0006996,GO:0007584,GO:0008144,GO:0008150,GO:0008152,GO:0008283,GO:0009266,GO:0009305,GO:…	6.3.4.10,6.3.4.11,6.3.4.15,6.3.4.9	ko:K01942,ko:K03524	BPL_C,BPL_LplA_LipB,BPL_N,FAD_binding_3,HTH_11,Methyltransf_31,PAS,PAS_3,Paf67,UbiA,zf-ANAPC11
g8026.t1	T	Adenylyl- / guanylyl cyclase, catalytic domain	-	-	4.6.1.2	ko:K12323,ko:K12324	ANF_receptor,Guanylate_cyc,HNOBA,Pkinase_Tyr
g8168.t1	T	Zona pellucida	ZP4	GO:0000003,GO:0002682,GO:0002684,GO:0002694,GO:0002696,GO:0002920,GO:0002922,GO:0003674,GO:0005488,GO:0005515,GO:0005575,GO:0005576,GO:0006810,GO:0006887,GO:0007338,GO:0007339,GO:0007340,GO:0008037,GO:0008150,GO:0008284,GO:0009566,GO:0009987,GO:0009988,GO:0016192,GO:0017156,GO:0019899,GO:0019953,GO:0022407,GO:0022409,GO:0022414,GO:0030155,GO:0032190,GO:0032940,GO:0032944,GO:0032946,GO:0032991,GO:…	-	ko:K19926	Trefoil,Zona_pellucida
g8607.t1	-	-	-	-	-	-	Lectin_C,Pacifastin_I,WAP
g8622.t1	G	transmembrane transporter activity	SLC35F4	GO:0006810,GO:0008150,GO:0015888,GO:0015893,GO:0042221,GO:0042493,GO:0045117,GO:0050896,GO:0051179,GO:0051180,GO:0051234,GO:0071702,GO:0071705,GO:0072348	-	ko:K15288	EamA,Neur_chan_LBD,Neur_chan_memb,Pkinase,SLC35F,TPT
g8634.t1	S	Endonuclease-reverse transcriptase	-	-	-	-	7tm_1,DUF4283,Exo_endo_phos_2,RRM_1,RVT_1,RVT_3,zf-RVT
g8846.t1	J	component of the eukaryotic translation initiation factor 3 (eIF-3) complex, which is involved in protein synthesis of a specialized repertoire of mRNAs and, together with other initiation factors, stimulates binding of mRNA and methionyl-tRNAi to the 40S ribosome. The eIF-3 complex specifically targets and initiates translation of a subset of mRNAs involved in cell proliferation	EIF3K	GO:0005575,GO:0005622,GO:0005623,GO:0005737,GO:0005829,GO:0005852,GO:0006412,GO:0006413,GO:0006518,GO:0006807,GO:0008150,GO:0008152,GO:0009058,GO:0009059,GO:0009987,GO:0010467,GO:0010941,GO:0010942,GO:0019538,GO:0032991,GO:0034641,GO:0034645,GO:0042981,GO:0043043,GO:0043065,GO:0043067,GO:0043068,GO:0043170,GO:0043603,GO:0043604,GO:0044237,GO:0044238,GO:0044249,GO:0044260,GO:0044267,GO:0044271,GO:…	-	ko:K05699,ko:K13344,ko:K15028	Ank_4,CH,CSN8_PSD8_EIF3K,EFhand_Ca_insen,ER,Sec34,Spectrin
g8952.t1	-	-	-	-	-	-	-
g8953.t1	-	-	-	-	-	-	ALS2CR8,PHD,Peptidase_C48,SWIM
g9427.t1	VW	MAM domain, meprin/A5/mu	-	-	-	-	C8,CUB,EGF,IgGFc_binding,Lectin_C,MAM,Methyltransf_FA,NIDO,Pollen_Ole_e_I,TIL,TILa,VWD,Zona_pellucida,hEGF
g9620.t1	O	apoptosis	IAP1	GO:0000003,GO:0000209,GO:0001667,GO:0002009,GO:0002020,GO:0002064,GO:0002065,GO:0002066,GO:0002165,GO:0003006,GO:0003674,GO:0003824,GO:0004842,GO:0004857,GO:0004866,GO:0004869,GO:0005488,GO:0005515,GO:0005575,GO:0005622,GO:0005623,GO:0005634,GO:0005737,GO:0006464,GO:0006508,GO:0006511,GO:0006807,GO:0006915,GO:0006928,GO:0006996,GO:0006997,GO:0007275,GO:0007276,GO:0007281,GO:0007283,GO:0007286,GO:…	2.3.2.27	ko:K04725,ko:K16061	AIG1,BIR,DS,MORN,UCH,USP7_ICP0_bdg,zf-C3HC4_3
g9690.t1	-	-	-	-	-	-	7TM_GPCR_Srw,DNA_pol_B_2,Rho_N
g10390.t1	-	-	-	-	-	-	DUF1258,HTH_23,HTH_29,Peptidase_C48,Transposase_21
g10391.t1	L	transposition, RNA-mediated	-	-	-	-	Baculo_F,Chromo,Pkinase,rve
g10392.t1	I	acetyl-CoA carboxylase activity. It is involved in the biological process described with fatty acid biosynthetic process	ABCC2	GO:0000003,GO:0000041,GO:0000166,GO:0000902,GO:0001101,GO:0001676,GO:0002119,GO:0002164,GO:0002237,GO:0003002,GO:0003008,GO:0003014,GO:0003674,GO:0003824,GO:0003989,GO:0004075,GO:0005215,GO:0005310,GO:0005342,GO:0005488,GO:0005515,GO:0005524,GO:0005575,GO:0005622,GO:0005623,GO:0005737,GO:0005739,GO:0005783,GO:0005789,GO:0005829,GO:0005886,GO:0005887,GO:0005903,GO:0005911,GO:0005975,GO:0005976,GO:…	2.1.3.15,6.3.4.14,6.4.1.2	ko:K01946,ko:K05665,ko:K05666,ko:K05670,ko:K11262	ABC_membrane,ABC_tran,ACC_central,Biotin_carb_C,Biotin_carb_N,Biotin_lipoyl,CPSase_L_D2,Carboxyl_trans,CutC,HECT,HLH,MTABC_N,Tctex-1
g10393.t1	-	-	-	-	-	-	7tm_1
g10637.t1	-	-	-	-	-	-	Peptidase_C48
g11094.t1	L	transposition, RNA-mediated	-	-	-	-	-
g11250.t1	B	Histone-binding protein RBBP4 or subunit C of CAF1 complex	RBBP4	GO:0000003,GO:0000070,GO:0000118,GO:0000122,GO:0000123,GO:0000151,GO:0000228,GO:0000278,GO:0000280,GO:0000281,GO:0000302,GO:0000775,GO:0000776,GO:0000777,GO:0000778,GO:0000779,GO:0000780,GO:0000785,GO:0000790,GO:0000793,GO:0000794,GO:0000819,GO:0000910,GO:0000976,GO:0000977,GO:0000978,GO:0000987,GO:0001012,GO:0001067,GO:0001558,GO:0001708,GO:0002064,GO:0002065,GO:0002066,GO:0002244,GO:0002376,GO:…	-	ko:K10752,ko:K11659	ANAPC4_WD40,CAF1C_H4-bd,HAD_2,HMA,Hexapep,KxDL,PIG-P,WD40,Ycf54,adh_short_C2
g11747.t1	A	RNA recognition motif	CIRBP	GO:0000166,GO:0000959,GO:0001101,GO:0001558,GO:0003674,GO:0003676,GO:0003677,GO:0003690,GO:0003697,GO:0003723,GO:0003727,GO:0003729,GO:0003730,GO:0005488,GO:0005507,GO:0005524,GO:0005575,GO:0005622,GO:0005623,GO:0005634,GO:0005654,GO:0005730,GO:0005737,GO:0005739,GO:0006139,GO:0006355,GO:0006396,GO:0006412,GO:0006417,GO:0006518,GO:0006725,GO:0006807,GO:0006950,GO:0006970,GO:0006996,GO:0007275,GO:…	-	ko:K12741,ko:K12885,ko:K13186,ko:K13195	RRM_1
g11757.t1	T	Guanylate cyclase	gcy-22	GO:0001101,GO:0003008,GO:0006935,GO:0007610,GO:0007611,GO:0007612,GO:0007635,GO:0008150,GO:0008306,GO:0009605,GO:0009966,GO:0009967,GO:0010033,GO:0010035,GO:0010038,GO:0010226,GO:0010243,GO:0010646,GO:0010647,GO:0023051,GO:0023056,GO:0032026,GO:0032501,GO:0040011,GO:0042221,GO:0042330,GO:0043200,GO:0048518,GO:0048522,GO:0048583,GO:0048584,GO:0050789,GO:0050794,GO:0050848,GO:0050850,GO:0050877,GO:…	-	-	ANF_receptor,Guanylate_cyc,HNOBA,Pkinase,Pkinase_Tyr
g11793.t1	L	transposition, RNA-mediated	-	-	-	-	Baculo_F,Chromo,Pkinase,rve
g11799.t1	T	MAM and LDL-receptor class A domain-containing protein	-	-	2.7.10.1	ko:K05088,ko:K05099,ko:K05119	Gly_rich,Kazal_1,Kazal_2,Kringle,Ldl_recept_a,MAM,Pkinase_Tyr,TIG,fn2,fn3
g11856.t1	L	zinc finger	-	-	-	-	RVT_1,Retrotrans_gag,gag-asp_proteas,zf-CCHC
g11863.t1	O	Ring finger	-	GO:0000003,GO:0000139,GO:0000151,GO:0000209,GO:0000322,GO:0000323,GO:0000324,GO:0003006,GO:0003674,GO:0003824,GO:0004842,GO:0005488,GO:0005575,GO:0005622,GO:0005623,GO:0005634,GO:0005737,GO:0005773,GO:0005783,GO:0005789,GO:0005794,GO:0005975,GO:0005976,GO:0006355,GO:0006357,GO:0006464,GO:0006508,GO:0006511,GO:0006807,GO:0006950,GO:0006984,GO:0006991,GO:0007154,GO:0007165,GO:0007275,GO:0008104,GO:…	-	ko:K06030	DUF2921,Dynamin_N,FPN1,HAD_2,PBP,PQ-loop,TRAM1,TRAM_LAG1_CLN8,zf-C3HC4_2,zf-RING_11,zf-RING_2,zf-RING_5,zf-rbx1
g11920.t1	-	-	-	-	-	-	7TM_GPCR_Srw,DNA_pol_B_2,Rho_N
g12202.t1	Z	microtubule motor activity	KIF17	GO:0002119,GO:0002164,GO:0003674,GO:0003774,GO:0003777,GO:0003824,GO:0005575,GO:0005622,GO:0005623,GO:0005737,GO:0005815,GO:0005856,GO:0005871,GO:0005875,GO:0005929,GO:0006810,GO:0006928,GO:0006996,GO:0007017,GO:0007018,GO:0007275,GO:0008150,GO:0008569,GO:0008574,GO:0009791,GO:0009966,GO:0009987,GO:0010638,GO:0010639,GO:0010646,GO:0010970,GO:0015630,GO:0016043,GO:0016462,GO:0016787,GO:0016817,GO:…	-	ko:K10394,ko:K20198	DDOST_48kD,Kinesin,MMADHC,Microtub_bd
g12298.t1	T	Mitogen-Activated Protein Kinase Kinase Kinase	-	-	2.7.11.25	ko:K13414	HECT,Pkinase,ubiquitin
g12401.t1	M	metalloendopeptidase activity	-	-	-	-	Hemopexin,Homeobox,MAM,PG_binding_1,fn2
g12430.t1	O	Ring finger	-	GO:0000003,GO:0000139,GO:0000151,GO:0000209,GO:0000322,GO:0000323,GO:0000324,GO:0003006,GO:0003674,GO:0003824,GO:0004842,GO:0005488,GO:0005575,GO:0005622,GO:0005623,GO:0005634,GO:0005737,GO:0005773,GO:0005783,GO:0005789,GO:0005794,GO:0005975,GO:0005976,GO:0006355,GO:0006357,GO:0006464,GO:0006508,GO:0006511,GO:0006807,GO:0006950,GO:0006984,GO:0006991,GO:0007154,GO:0007165,GO:0007275,GO:0008104,GO:…	-	ko:K06030	DUF2921,Dynamin_N,FPN1,HAD_2,PBP,PQ-loop,TRAM1,TRAM_LAG1_CLN8,zf-C3HC4_2,zf-RING_11,zf-RING_2,zf-RING_5,zf-rbx1
g12593.t1	S	aspartate dehydrogenase activity	ASPDH	-	1.4.1.21	ko:K06989	DUF108,NAD_binding_3
g12655.t1	-	-	-	-	-	-	Tnp_zf-ribbon_2
g12689.t1	-	-	-	-	-	-	zf-CCHC
g12712.t1	-	-	-	-	-	-	DUF1258,Transposase_21
g12879.t1	S	Domain first found in C1r, C1s, uEGF, and bone morphogenetic protein.	CSRP2BP	GO:0000086,GO:0000123,GO:0000278,GO:0003674,GO:0003824,GO:0004402,GO:0005488,GO:0005515,GO:0005575,GO:0005622,GO:0005623,GO:0005634,GO:0005654,GO:0005671,GO:0005737,GO:0005739,GO:0006325,GO:0006338,GO:0006464,GO:0006473,GO:0006475,GO:0006807,GO:0006996,GO:0007005,GO:0007049,GO:0008080,GO:0008150,GO:0008152,GO:0008535,GO:0009893,GO:0009987,GO:0010485,GO:0010604,GO:0010638,GO:0016043,GO:0016407,GO:…	2.3.1.258	ko:K16774,ko:K20793	Acetyltransf_1,Acetyltransf_10,Acetyltransf_7,CUB,IQ,Smr
g12904.t1	T	It is involved in the biological process described with	-	-	4.6.1.2	ko:K01769,ko:K12323,ko:K16573	ANF_receptor,Guanylate_cyc,HNOBA,Pkinase_Tyr,Spc97_Spc98
g12998.t1	-	-	-	-	-	-	7TM_GPCR_Srw,DNA_pol_B_2
g13120.t1	T	Belongs to the disease resistance NB-LRR family	-	-	-	ko:K13457	LRR_4,LRR_8,NB-ARC,Plant_tran
g13129.t1	G	It is involved in the biological process described with transmembrane transport	-	GO:0003674,GO:0005215,GO:0005575,GO:0006810,GO:0006811,GO:0006820,GO:0008150,GO:0016020,GO:0016021,GO:0022857,GO:0031224,GO:0044425,GO:0051179,GO:0051234,GO:0055085	-	ko:K08193,ko:K12301	EF-hand_1,MFS_1,Peptidase_C54,RVT_1,Sugar_tr,UDPGT
g13263.t1	T	Natriuretic peptide receptor	Gucy2g	GO:0003674,GO:0003824,GO:0004383,GO:0005575,GO:0005622,GO:0005623,GO:0005737,GO:0005829,GO:0005886,GO:0006139,GO:0006163,GO:0006164,GO:0006182,GO:0006725,GO:0006753,GO:0006793,GO:0006796,GO:0006807,GO:0007154,GO:0007165,GO:0008074,GO:0008150,GO:0008152,GO:0009058,GO:0009117,GO:0009150,GO:0009152,GO:0009165,GO:0009187,GO:0009190,GO:0009259,GO:0009260,GO:0009897,GO:0009975,GO:0009986,GO:0009987,GO:…	4.6.1.2	ko:K12322,ko:K12323,ko:K12324	ANF_receptor,Guanylate_cyc,HNOBA,Pkinase,Pkinase_Tyr
g13303.t1	K	Zinc-binding domain present in Lin-11, Isl-1, Mec-3.	LHX3	GO:0000003,GO:0000166,GO:0000902,GO:0000904,GO:0000976,GO:0000977,GO:0000981,GO:0000988,GO:0000989,GO:0001012,GO:0001067,GO:0001076,GO:0001085,GO:0001228,GO:0001708,GO:0001890,GO:0003002,GO:0003006,GO:0003674,GO:0003676,GO:0003677,GO:0003690,GO:0003700,GO:0005488,GO:0005515,GO:0005575,GO:0005622,GO:0005623,GO:0005634,GO:0005654,GO:0005667,GO:0006139,GO:0006351,GO:0006355,GO:0006357,GO:0006366,GO:…	-	ko:K09374,ko:K09378	Homeobox,LIM
g13446.t1	L	Integrase core domain	-	-	-	-	Asp_protease_2,Glycoprotein_B,PNMA,RVT_1,Retrotrans_gag,gag-asp_proteas,rve,zf-CCHC,zf-H2C2
g13454.t1	O	CD109 molecule	CD109	GO:0000768,GO:0001932,GO:0001933,GO:0001942,GO:0002376,GO:0002520,GO:0002521,GO:0002573,GO:0002576,GO:0003674,GO:0005488,GO:0005515,GO:0005575,GO:0005576,GO:0005615,GO:0005622,GO:0005623,GO:0005737,GO:0005886,GO:0006810,GO:0006887,GO:0006949,GO:0006950,GO:0006952,GO:0007275,GO:0008150,GO:0008285,GO:0008544,GO:0009605,GO:0009607,GO:0009617,GO:0009620,GO:0009653,GO:0009888,GO:0009892,GO:0009966,GO:…	-	ko:K06530	A2M,A2M_N,A2M_N_2,A2M_comp,A2M_recep,DUF1891,Laminin_G_3,NACHT,TLV_coat,Thiol-ester_cl
g13456.t1	O	Astacin-like metallo-endopeptidase (M12 family)	-	-	3.4.24.63	ko:K08606	Astacin,Ricin_B_lectin
g13483.t1	T	Immunoglobulin C-2 Type	CHL1	GO:0000003,GO:0000132,GO:0000226,GO:0000278,GO:0000902,GO:0000904,GO:0001101,GO:0001501,GO:0001508,GO:0001525,GO:0001558,GO:0001568,GO:0001667,GO:0001764,GO:0001775,GO:0001871,GO:0001932,GO:0001944,GO:0002009,GO:0002020,GO:0002064,GO:0002165,GO:0002175,GO:0002252,GO:0002263,GO:0002274,GO:0002275,GO:0002283,GO:0002366,GO:0002376,GO:0002443,GO:0002444,GO:0002446,GO:0003007,GO:0003008,GO:0003381,GO:…	-	ko:K06550,ko:K06756,ko:K06757,ko:K06758,ko:K06760	Bravo_FIGEY,DUF4821,Glyco_hydro_47,Homeobox,I-set,Ig_2,Ig_3,TRAP-delta,V-set,fn3,ig
g13649.t1	-	-	-	-	-	-	7TM_GPCR_Srw,DNA_pol_B_2
g13944.t1	E	K02A2.6-like	-	-	-	-	7tm_1,Asp_protease_2,RVP_2,RVT_1,SCAN,gag-asp_proteas,rve,zf-CCHC,zf-H2C2
g14042.t1	-	-	-	-	-	-	7TM_GPCR_Srw,DNA_pol_B_2
g14284.t1	S	oxidation-reduction process	-	-	-	-	Exo_endo_phos_2,Herpes_teg_N
g14478.t1	K	Zinc finger, C2H2 type	topi	GO:0000003,GO:0000228,GO:0000280,GO:0000785,GO:0000790,GO:0003674,GO:0005488,GO:0005515,GO:0005575,GO:0005622,GO:0005623,GO:0005634,GO:0005694,GO:0006355,GO:0006996,GO:0007049,GO:0007140,GO:0007276,GO:0007283,GO:0008150,GO:0009889,GO:0009891,GO:0009893,GO:0009987,GO:0010468,GO:0010556,GO:0010557,GO:0010604,GO:0010628,GO:0016043,GO:0019219,GO:0019222,GO:0019953,GO:0022402,GO:0022412,GO:0022414,GO:…	-	ko:K09228	THAP,ubiquitin,zf-AD,zf-C2H2,zf-C2H2_4,zf-C2H2_6,zf-met
g14718.t1	S	carbohydrate binding	CLEC9A	GO:0001817,GO:0001819,GO:0002791,GO:0002793,GO:0005575,GO:0005623,GO:0006810,GO:0006897,GO:0006898,GO:0008150,GO:0009986,GO:0016192,GO:0032879,GO:0032880,GO:0044464,GO:0048518,GO:0048522,GO:0050707,GO:0050708,GO:0050714,GO:0050715,GO:0050789,GO:0050794,GO:0051046,GO:0051047,GO:0051049,GO:0051050,GO:0051179,GO:0051222,GO:0051223,GO:0051234,GO:0051239,GO:0051240,GO:0065007,GO:0070201,GO:0090087,GO:…	-	ko:K17515,ko:K17516	Lectin_C,Ly49
g14774.t1	T	negative regulation of bile acid biosynthetic process	-	-	2.7.10.1	ko:K05088,ko:K05099	FXa_inhibition,Gla,IgGFc_binding,Ig_3,Kazal_1,Kazal_2,Ldl_recept_a,MAM,Mucin2_WxxW,NIDO,Pkinase_Tyr,SEA,TIG,U-box,cEGF,fn2,fn3
g15163.t1	GO	WSC domain	-	-	-	-	DUF1996,PAN_4,WSC
g15384.t1	S	MULE transposase domain	-	-	-	-	FLYWCH,MULE
g15389.t1	S	Retrotransposon gag protein	ASPRV1	GO:0003674,GO:0003824,GO:0004175,GO:0004190,GO:0005575,GO:0006508,GO:0006807,GO:0007275,GO:0008150,GO:0008152,GO:0008233,GO:0010467,GO:0016020,GO:0016021,GO:0016485,GO:0016787,GO:0019538,GO:0031224,GO:0032501,GO:0032502,GO:0043170,GO:0043588,GO:0044238,GO:0044425,GO:0048513,GO:0048731,GO:0048856,GO:0051604,GO:0070001,GO:0070011,GO:0071704,GO:0140096,GO:1901564	-	-	Asp_protease_2,RVP,RVP_2,Retrotrans_gag,gag-asp_proteas
g15489.t1	T	Adenylyl- / guanylyl cyclase, catalytic domain	-	-	4.6.1.2	ko:K12323,ko:K12324	ANF_receptor,Guanylate_cyc,Pkinase_Tyr
g15653.t1	-	-	-	-	-	-	DUF1258,HTH_23,HTH_29,Peptidase_C48,Transposase_21
g111.t1	-	-	-	-	-	-	7TM_GPCR_Srw,DNA_pol_B_2
g369.t1	-	-	-	-	-	-	7TM_GPCR_Srw,DNA_pol_B_2
g380.t1	O	Baculoviral inhibition of apoptosis protein repeat	BIRC7	GO:0000022,GO:0000070,GO:0000075,GO:0000165,GO:0000187,GO:0000209,GO:0000226,GO:0000228,GO:0000278,GO:0000280,GO:0000775,GO:0000776,GO:0000777,GO:0000778,GO:0000779,GO:0000780,GO:0000785,GO:0000790,GO:0000792,GO:0000793,GO:0000794,GO:0000819,GO:0001932,GO:0001934,GO:0002020,GO:0002225,GO:0002682,GO:0002684,GO:0002697,GO:0002699,GO:0002700,GO:0002702,GO:0002759,GO:0002760,GO:0002784,GO:0002786,GO:…	2.3.2.27	ko:K04725,ko:K12807,ko:K16060,ko:K16061	AT_hook,BIR,CARD,DS,MORN,NACHT,TBP,UCH,USP7_ICP0_bdg,zf-C3HC4_3
g397.t1	-	-	-	-	-	-	DUF1258,Transposase_21
g760.t1	S	YqaJ-like viral recombinase domain	-	-	-	-	Herpes_alk_exo,PIF1,Peptidase_C48,YqaJ
g9300.t1	O	Astacin (Peptidase family M12A)	-	-	3.4.24.21	ko:K08076	Astacin,CUB,F5_F8_type_C,MAM,Ricin_B_lectin,ShK,Sushi
g9301.t1	S	Relaxin insulin-like family peptide receptor	-	-	-	ko:K08397	7tm_1
g9303.t1	O	It is involved in the biological process described with proteolysis	mep1b	-	3.4.24.63	ko:K08606	Arf,Astacin,DUF1891,MAM
g9304.t1	O	metalloendopeptidase activity	MEP1B	GO:0003674,GO:0003824,GO:0004175,GO:0004222,GO:0005488,GO:0005515,GO:0005575,GO:0005576,GO:0005615,GO:0005623,GO:0005886,GO:0005887,GO:0006508,GO:0006807,GO:0006810,GO:0008150,GO:0008152,GO:0008233,GO:0008237,GO:0016020,GO:0016021,GO:0016787,GO:0017090,GO:0019538,GO:0031224,GO:0031226,GO:0032991,GO:0042802,GO:0043170,GO:0044238,GO:0044421,GO:0044425,GO:0044459,GO:0044464,GO:0051179,GO:0051234,GO:…	3.4.24.18,3.4.24.63	ko:K01395,ko:K08606,ko:K08778	Astacin,DUF1891,EGF,Histone,Lectin_C,MAM,Methyltransf_FA,TSP_1,VCBS,VWD
g9310.t1	O	Protease, serine 56	PRSS56	GO:0001654,GO:0003674,GO:0003824,GO:0004175,GO:0004252,GO:0005575,GO:0005622,GO:0005623,GO:0005737,GO:0005783,GO:0006508,GO:0006807,GO:0007275,GO:0007423,GO:0008150,GO:0008152,GO:0008233,GO:0008236,GO:0012505,GO:0016787,GO:0017171,GO:0019538,GO:0032501,GO:0032502,GO:0043010,GO:0043170,GO:0043226,GO:0043227,GO:0043229,GO:0043231,GO:0044238,GO:0044424,GO:0044444,GO:0044464,GO:0048513,GO:0048731,GO:…	-	-	TSP_1,Trypsin
g9419.t1	T	Nidogen 2a (osteonidogen)	NID2	GO:0000902,GO:0000904,GO:0001764,GO:0003674,GO:0005198,GO:0005201,GO:0005488,GO:0005518,GO:0005575,GO:0005576,GO:0005604,GO:0005623,GO:0005886,GO:0006928,GO:0006935,GO:0007154,GO:0007155,GO:0007160,GO:0007267,GO:0007268,GO:0007271,GO:0007275,GO:0007399,GO:0007409,GO:0007411,GO:0008104,GO:0008150,GO:0009605,GO:0009653,GO:0009986,GO:0009987,GO:0016020,GO:0016043,GO:0016477,GO:0022008,GO:0022610,GO:…	-	ko:K06826	7tm_2,EGF,EGF_3,EGF_CA,EGF_MSP1_1,FXa_inhibition,G2F,GAIN,GPS,I-set,Kunitz_BPTI,Ldl_recept_b,NIDO,NTR,OLF,PLAC,Thyroglobulin_1,WAP,cEGF,fn3,hEGF
g9420.t1	S	response to leukemia inhibitory factor	EFHC2	GO:0005575,GO:0005623,GO:0006996,GO:0007275,GO:0007399,GO:0007416,GO:0007528,GO:0008150,GO:0009987,GO:0010033,GO:0010769,GO:0010975,GO:0016043,GO:0022008,GO:0022603,GO:0022604,GO:0022607,GO:0030030,GO:0030031,GO:0030154,GO:0030424,GO:0030425,GO:0031344,GO:0032501,GO:0032502,GO:0033267,GO:0034097,GO:0036477,GO:0040007,GO:0042221,GO:0042995,GO:0043005,GO:0043025,GO:0043195,GO:0043679,GO:0044085,GO:…	-	-	DUF1126
g9421.t1	S	MAP kinase kinase kinase activity	-	-	2.7.11.1,2.7.11.25	ko:K04420,ko:K08269,ko:K08857,ko:K13412	EF-hand_1,EF-hand_5,EF-hand_7,Pkinase
g9422.t1	T	Domain with 2 conserved Trp (W) residues	-	-	-	ko:K17593	Ank_2,EF-hand_5,EF-hand_7,EF-hand_8,Pkinase,Pkinase_Tyr,SAM_1,WEMBL,WW
g9423.t1	T	Domain with 2 conserved Trp (W) residues	-	-	-	ko:K17593	Ank_2,EF-hand_5,EF-hand_7,EF-hand_8,Pkinase,Pkinase_Tyr,SAM_1,WEMBL,WW
g9426.t1	T	activity. It is involved in the biological process described with	BRAF	GO:0000003,GO:0000165,GO:0000166,GO:0000186,GO:0000578,GO:0001505,GO:0001666,GO:0001667,GO:0001678,GO:0001708,GO:0001763,GO:0001775,GO:0001932,GO:0001934,GO:0002009,GO:0002064,GO:0002065,GO:0002066,GO:0002119,GO:0002164,GO:0002165,GO:0002168,GO:0002218,GO:0002220,GO:0002223,GO:0002244,GO:0002253,GO:0002318,GO:0002360,GO:0002376,GO:0002429,GO:0002520,GO:0002521,GO:0002682,GO:0002684,GO:0002694,GO:…	2.7.11.1,3.1.3.48	ko:K04365,ko:K04366,ko:K05695,ko:K08845	C1_1,Pkinase,Pkinase_Tyr,RBD,Ribosomal_S4,S4,Y_phosphatase
g10506.t1	S	Retrotransposon gag protein	ASPRV1	GO:0003674,GO:0003824,GO:0004175,GO:0004190,GO:0005575,GO:0006508,GO:0006807,GO:0007275,GO:0008150,GO:0008152,GO:0008233,GO:0010467,GO:0016020,GO:0016021,GO:0016485,GO:0016787,GO:0019538,GO:0031224,GO:0032501,GO:0032502,GO:0043170,GO:0043588,GO:0044238,GO:0044425,GO:0048513,GO:0048731,GO:0048856,GO:0051604,GO:0070001,GO:0070011,GO:0071704,GO:0140096,GO:1901564	-	-	Asp_protease_2,RVP,RVP_2,Retrotrans_gag,gag-asp_proteas
g10507.t1	T	guanylate cyclase activity	-	GO:0003674,GO:0003824,GO:0004383,GO:0005575,GO:0005622,GO:0005623,GO:0005737,GO:0005829,GO:0005886,GO:0005887,GO:0006139,GO:0006163,GO:0006164,GO:0006182,GO:0006725,GO:0006753,GO:0006793,GO:0006796,GO:0006807,GO:0007154,GO:0007165,GO:0008074,GO:0008150,GO:0008152,GO:0009058,GO:0009117,GO:0009150,GO:0009152,GO:0009165,GO:0009187,GO:0009190,GO:0009259,GO:0009260,GO:0009975,GO:0009987,GO:0016020,GO:…	4.6.1.2	ko:K12323,ko:K12324,ko:K12325	ANF_receptor,Ank_2,Guanylate_cyc,HNOBA,Pkinase,Pkinase_Tyr
g10509.t1	T	Olfactory receptor	TRHR	GO:0003674,GO:0004888,GO:0004930,GO:0004997,GO:0005488,GO:0005515,GO:0005575,GO:0005623,GO:0005886,GO:0005887,GO:0006873,GO:0006874,GO:0006875,GO:0007154,GO:0007165,GO:0007186,GO:0007204,GO:0008150,GO:0009986,GO:0009987,GO:0016020,GO:0016021,GO:0019725,GO:0023052,GO:0030003,GO:0031224,GO:0031226,GO:0032092,GO:0038023,GO:0042592,GO:0042802,GO:0042803,GO:0043393,GO:0043496,GO:0044093,GO:0044425,GO:…	-	ko:K04282	7tm_1
g10511.t1	T	guanylate cyclase activity	-	GO:0003674,GO:0003824,GO:0004383,GO:0005575,GO:0005622,GO:0005623,GO:0005737,GO:0005829,GO:0005886,GO:0005887,GO:0006139,GO:0006163,GO:0006164,GO:0006182,GO:0006725,GO:0006753,GO:0006793,GO:0006796,GO:0006807,GO:0007154,GO:0007165,GO:0008074,GO:0008150,GO:0008152,GO:0009058,GO:0009117,GO:0009150,GO:0009152,GO:0009165,GO:0009187,GO:0009190,GO:0009259,GO:0009260,GO:0009975,GO:0009987,GO:0016020,GO:…	4.6.1.2	ko:K12323,ko:K12324,ko:K12325	ANF_receptor,Ank_2,Guanylate_cyc,HNOBA,Pkinase,Pkinase_Tyr
g10512.t1	S	PMP-22/EMP/MP20/Claudin tight junction	-	GO:0005575,GO:0005911,GO:0005918,GO:0005919,GO:0007043,GO:0007275,GO:0007399,GO:0007424,GO:0008150,GO:0009987,GO:0010001,GO:0016043,GO:0019991,GO:0021782,GO:0022008,GO:0022607,GO:0030054,GO:0030154,GO:0032501,GO:0032502,GO:0034329,GO:0034330,GO:0035150,GO:0035151,GO:0035152,GO:0035159,GO:0042063,GO:0043296,GO:0043297,GO:0044085,GO:0045216,GO:0048468,GO:0048731,GO:0048856,GO:0048869,GO:0060541,GO:…	-	-	Claudin_2
g11056.t1	O	Folate receptor family	-	-	-	-	7tm_1,Cytokin_check_N,Folate_rec
g11060.t1	O	Zinc-dependent metalloprotease	ASTL	GO:0000003,GO:0001775,GO:0003674,GO:0003824,GO:0004175,GO:0004222,GO:0005575,GO:0005622,GO:0005623,GO:0005737,GO:0005886,GO:0006508,GO:0006807,GO:0007155,GO:0007275,GO:0007338,GO:0007343,GO:0007610,GO:0007631,GO:0008150,GO:0008152,GO:0008233,GO:0008237,GO:0009566,GO:0009893,GO:0009987,GO:0010468,GO:0010604,GO:0010628,GO:0010954,GO:0012505,GO:0016020,GO:0016787,GO:0019222,GO:0019538,GO:0019953,GO:…	3.4.24.21	ko:K08076,ko:K08778	Astacin,Innexin,MAM
g11062.t1	EPT	Glutamate receptor ionotropic, kainate	GRIK5	GO:0001505,GO:0001678,GO:0003008,GO:0003674,GO:0004888,GO:0004970,GO:0005215,GO:0005216,GO:0005230,GO:0005261,GO:0005267,GO:0005272,GO:0005488,GO:0005515,GO:0005575,GO:0005622,GO:0005623,GO:0005634,GO:0005737,GO:0005783,GO:0005886,GO:0005887,GO:0006621,GO:0006810,GO:0006811,GO:0006812,GO:0006813,GO:0006814,GO:0007154,GO:0007165,GO:0007166,GO:0007215,GO:0007267,GO:0007268,GO:0008066,GO:0008104,GO:…	-	ko:K05201,ko:K05202,ko:K05203,ko:K05204,ko:K05205,ko:K05313	ANF_receptor,Lig_chan,Lig_chan-Glu_bd,SBP_bac_3
g11063.t1	F	Catalyzes the reversible transfer of the terminal phosphate group between ATP and AMP. Plays an important role in cellular energy homeostasis and in adenine nucleotide metabolism	F38B2.4	GO:0003674,GO:0003824,GO:0004017,GO:0005575,GO:0005622,GO:0005623,GO:0005634,GO:0005737,GO:0006139,GO:0006206,GO:0006207,GO:0006725,GO:0006753,GO:0006793,GO:0006796,GO:0006807,GO:0008150,GO:0008152,GO:0009041,GO:0009058,GO:0009112,GO:0009117,GO:0009123,GO:0009165,GO:0009987,GO:0016301,GO:0016310,GO:0016740,GO:0016772,GO:0016776,GO:0018130,GO:0019205,GO:0019438,GO:0019637,GO:0019856,GO:0034641,GO:…	2.7.4.14,2.7.4.3	ko:K00939,ko:K13800	ADK,PEP-utilizers,PEP-utilizers_C,PPDK_N,RIIa
g11064.t1	S	Sterile alpha motif.	SAMD1	-	-	-	DUF3504,PHD,SAM_1
g11065.t1	T	Tyrosine kinase, catalytic domain	FGFR4	GO:0000003,GO:0000122,GO:0000165,GO:0000323,GO:0000902,GO:0000904,GO:0001501,GO:0001503,GO:0001525,GO:0001568,GO:0001570,GO:0001654,GO:0001655,GO:0001657,GO:0001667,GO:0001701,GO:0001704,GO:0001706,GO:0001707,GO:0001709,GO:0001710,GO:0001711,GO:0001759,GO:0001763,GO:0001764,GO:0001816,GO:0001817,GO:0001818,GO:0001822,GO:0001823,GO:0001837,GO:0001889,GO:0001890,GO:0001892,GO:0001932,GO:0001934,GO:…	2.7.10.1	ko:K04362,ko:K05093,ko:K05094,ko:K05095	I-set,Ig_2,Ig_3,Pkinase_Tyr,ig
g11625.t1	M	metalloendopeptidase activity	-	-	-	-	Hemopexin,Homeobox,MAM,PG_binding_1,fn2
g11626.t1	T	peptidase activity	ADAMTSL1	GO:0000902,GO:0000904,GO:0003674,GO:0005102,GO:0005488,GO:0005515,GO:0005575,GO:0005576,GO:0005615,GO:0005622,GO:0005623,GO:0005737,GO:0005783,GO:0005788,GO:0006928,GO:0006935,GO:0007275,GO:0007399,GO:0007409,GO:0007411,GO:0007417,GO:0007419,GO:0008150,GO:0009605,GO:0009653,GO:0009987,GO:0012505,GO:0016043,GO:0022008,GO:0030030,GO:0030154,GO:0030182,GO:0031175,GO:0031974,GO:0032501,GO:0032502,GO:…	-	ko:K08624	ADAM_spacer1,BAR,CUB,Cullin,HYR,I-set,Ig_3,Laminin_G_3,MAM,PLAC,Pep_M12B_propep,RVT_1,Reprolysin,Reprolysin_4,SH3_1,SH3_9,TSP_1,UAA
g11627.t1	M	metalloendopeptidase activity	-	-	-	-	Hemopexin,Homeobox,MAM,PG_binding_1,fn2
g11628.t1	TV	Macrophage mannose receptor 1-like	-	-	-	ko:K06560	F5_F8_type_C,Gal_Lectin,Kringle,LCCL,Laminin_G_3,Lectin_C,Pentaxin,SEA,Trefoil,fn2
g11630.t1	T	Si ch211-106h4.4	malrd1	-	2.7.10.1	ko:K05088,ko:K05099,ko:K05100,ko:K05119	EGF,Gly_rich,I-set,Kringle,Ldl_recept_a,MAM,PSI,Pkinase_Tyr,Sema,TIG
g11631.t1	BD	Tigger transposable	PDC2	GO:0000003,GO:0000070,GO:0000228,GO:0000278,GO:0000280,GO:0000775,GO:0000779,GO:0000780,GO:0000785,GO:0000790,GO:0000792,GO:0000793,GO:0000794,GO:0000819,GO:0000976,GO:0000977,GO:0000978,GO:0000987,GO:0001012,GO:0001067,GO:0003006,GO:0003674,GO:0003676,GO:0003677,GO:0003690,GO:0005488,GO:0005575,GO:0005622,GO:0005623,GO:0005634,GO:0005694,GO:0006109,GO:0006140,GO:0006325,GO:0006342,GO:0006355,GO:…	-	-	CENP-B_N,DDE_1,DDE_Tnp_4,DUF4371,Dimer_Tnp_hAT,HTH_Tnp_Tc5,MADF_DNA_bdg
g11632.t1	S	MAP kinase kinase kinase activity	MAP3K19	GO:0001932,GO:0001934,GO:0003674,GO:0003824,GO:0004672,GO:0004674,GO:0005575,GO:0005622,GO:0005623,GO:0005737,GO:0006464,GO:0006468,GO:0006793,GO:0006796,GO:0006807,GO:0006950,GO:0007154,GO:0007165,GO:0007346,GO:0008150,GO:0008152,GO:0009893,GO:0009987,GO:0010562,GO:0010604,GO:0010941,GO:0016301,GO:0016310,GO:0016740,GO:0016772,GO:0016773,GO:0019220,GO:0019222,GO:0019538,GO:0023014,GO:0023052,GO:…	2.7.11.25	ko:K17533	Ank,Ank_2,Ank_4,Ank_5,Kelch_4,PB1,Pkinase,SPRY
g11857.t1	S	G-protein coupled receptor activity. It is involved in the biological process described with G-protein coupled receptor signaling pathway	GPR139	GO:0001653,GO:0003674,GO:0004888,GO:0004930,GO:0005488,GO:0005515,GO:0005575,GO:0005622,GO:0005623,GO:0005737,GO:0005829,GO:0005886,GO:0005887,GO:0007154,GO:0007165,GO:0007186,GO:0007200,GO:0007218,GO:0008150,GO:0008188,GO:0008528,GO:0009987,GO:0016020,GO:0016021,GO:0023052,GO:0030054,GO:0031224,GO:0031226,GO:0035236,GO:0038023,GO:0044424,GO:0044425,GO:0044444,GO:0044459,GO:0044464,GO:0046983,GO:…	-	ko:K08428,ko:K08430	7TM_GPCR_Srw,7tm_1
g11858.t1	T	Natriuretic peptide receptor	NPR2	GO:0000003,GO:0000166,GO:0001501,GO:0001653,GO:0001882,GO:0001883,GO:0003008,GO:0003013,GO:0003674,GO:0003824,GO:0004383,GO:0005488,GO:0005515,GO:0005524,GO:0005525,GO:0005575,GO:0005622,GO:0005623,GO:0005737,GO:0005829,GO:0005886,GO:0005887,GO:0006139,GO:0006163,GO:0006164,GO:0006182,GO:0006725,GO:0006753,GO:0006793,GO:0006796,GO:0006807,GO:0006935,GO:0007154,GO:0007165,GO:0007166,GO:0007167,GO:…	4.6.1.2	ko:K12323,ko:K12324,ko:K12325	ANF_receptor,Dimer_Tnp_hAT,Guanylate_cyc,HNOBA,Pkinase,Pkinase_Tyr
g11862.t1	T	Adenylyl- / guanylyl cyclase, catalytic domain	-	GO:0003674,GO:0003824,GO:0004383,GO:0005575,GO:0005622,GO:0005623,GO:0005737,GO:0005829,GO:0005886,GO:0006139,GO:0006163,GO:0006164,GO:0006182,GO:0006725,GO:0006753,GO:0006793,GO:0006796,GO:0006807,GO:0007154,GO:0007165,GO:0008074,GO:0008150,GO:0008152,GO:0009058,GO:0009117,GO:0009150,GO:0009152,GO:0009165,GO:0009187,GO:0009190,GO:0009259,GO:0009260,GO:0009975,GO:0009987,GO:0016020,GO:0016829,GO:…	-	-	Guanylate_cyc,HNOBA,NIT,Trypsin
g12901.t1	T	guanylate cyclase activity	-	GO:0003674,GO:0003824,GO:0004383,GO:0005575,GO:0005622,GO:0005623,GO:0005737,GO:0005829,GO:0005886,GO:0005887,GO:0006139,GO:0006163,GO:0006164,GO:0006182,GO:0006725,GO:0006753,GO:0006793,GO:0006796,GO:0006807,GO:0007154,GO:0007165,GO:0008074,GO:0008150,GO:0008152,GO:0009058,GO:0009117,GO:0009150,GO:0009152,GO:0009165,GO:0009187,GO:0009190,GO:0009259,GO:0009260,GO:0009975,GO:0009987,GO:0016020,GO:…	4.6.1.2	ko:K12323,ko:K12324,ko:K12325	ANF_receptor,Ank_2,Guanylate_cyc,HNOBA,Pkinase,Pkinase_Tyr
g13386.t1	M	peptidoglycan recognition protein	PGLYRP3	GO:0000270,GO:0001817,GO:0001818,GO:0001906,GO:0001932,GO:0001933,GO:0002218,GO:0002221,GO:0002225,GO:0002237,GO:0002252,GO:0002253,GO:0002376,GO:0002682,GO:0002683,GO:0002684,GO:0002694,GO:0002695,GO:0002697,GO:0002698,GO:0002699,GO:0002700,GO:0002702,GO:0002757,GO:0002758,GO:0002759,GO:0002760,GO:0002764,GO:0002784,GO:0002786,GO:0002803,GO:0002805,GO:0002807,GO:0002808,GO:0002813,GO:0002831,GO:…	-	ko:K01446	Amidase_2
g13398.t1	O	Zinc-dependent metalloprotease	nas-15	GO:0005575,GO:0005622,GO:0005623,GO:0005737,GO:0007275,GO:0007610,GO:0007631,GO:0008150,GO:0012505,GO:0030133,GO:0031410,GO:0031982,GO:0032501,GO:0032502,GO:0035295,GO:0042755,GO:0043050,GO:0043226,GO:0043227,GO:0043229,GO:0044424,GO:0044444,GO:0044464,GO:0048565,GO:0048731,GO:0048856,GO:0055123,GO:0060465,GO:0097708	3.4.24.21,3.4.24.63,3.4.24.66,3.4.24.67	ko:K08076,ko:K08606,ko:K13047,ko:K18542,ko:K18543	Astacin,CUB,DERM,F5_F8_type_C,Laminin_G_3,ShK,TSP_1
g13399.t1	J	assembly of large subunit precursor of preribosome	RSL24D1	GO:0000027,GO:0001671,GO:0002181,GO:0003674,GO:0003676,GO:0003723,GO:0003735,GO:0005198,GO:0005488,GO:0005575,GO:0005622,GO:0005623,GO:0005634,GO:0005730,GO:0005737,GO:0005829,GO:0005840,GO:0006412,GO:0006518,GO:0006807,GO:0006996,GO:0008047,GO:0008150,GO:0008152,GO:0009058,GO:0009059,GO:0009987,GO:0010467,GO:0015934,GO:0016043,GO:0019538,GO:0022607,GO:0022613,GO:0022618,GO:0022625,GO:0022626,GO:…	-	ko:K02896	ABC_tran,B_lectin,Fer4,His_Phos_1,MOEP19,RLI,Ribosomal_L14,Ribosomal_L24e,S_locus_glycop
g13401.t1	T	Atrial natriuretic peptide receptor	NPR1	GO:0000166,GO:0001558,GO:0001653,GO:0001882,GO:0001883,GO:0003008,GO:0003013,GO:0003014,GO:0003018,GO:0003674,GO:0003824,GO:0004383,GO:0004888,GO:0004930,GO:0005488,GO:0005515,GO:0005525,GO:0005575,GO:0005622,GO:0005623,GO:0005737,GO:0005829,GO:0005886,GO:0005887,GO:0006139,GO:0006163,GO:0006164,GO:0006182,GO:0006584,GO:0006725,GO:0006753,GO:0006793,GO:0006796,GO:0006807,GO:0006810,GO:0006935,GO:…	4.6.1.2	ko:K12323,ko:K12324,ko:K12325,ko:K13140	ANF_receptor,Dimer_Tnp_hAT,Guanylate_cyc,HNOBA,Ints3,Pkinase,Pkinase_Tyr
g13496.t1	T	It is involved in the biological process described with	-	GO:0003674,GO:0003824,GO:0004383,GO:0005575,GO:0005622,GO:0005623,GO:0005737,GO:0005829,GO:0005886,GO:0005887,GO:0006139,GO:0006163,GO:0006164,GO:0006182,GO:0006725,GO:0006753,GO:0006793,GO:0006796,GO:0006807,GO:0007154,GO:0007165,GO:0008074,GO:0008150,GO:0008152,GO:0009058,GO:0009117,GO:0009150,GO:0009152,GO:0009165,GO:0009187,GO:0009190,GO:0009259,GO:0009260,GO:0009975,GO:0009987,GO:0016020,GO:…	4.6.1.2	ko:K12323,ko:K12324	ANF_receptor,Ank_2,Guanylate_cyc,HNOBA,Pkinase,Pkinase_Tyr
g13497.t1	O	It is involved in the biological process described with proteolysis	mep1b	-	3.4.24.63	ko:K08606	Arf,Astacin,DUF1891,MAM
g13498.t1	T	Heme NO binding associated	-	GO:0003674,GO:0003824,GO:0004383,GO:0005575,GO:0005622,GO:0005623,GO:0005737,GO:0005829,GO:0005886,GO:0005887,GO:0006139,GO:0006163,GO:0006164,GO:0006182,GO:0006725,GO:0006753,GO:0006793,GO:0006796,GO:0006807,GO:0007154,GO:0007165,GO:0008074,GO:0008150,GO:0008152,GO:0009058,GO:0009117,GO:0009150,GO:0009152,GO:0009165,GO:0009187,GO:0009190,GO:0009259,GO:0009260,GO:0009975,GO:0009987,GO:0016020,GO:…	4.6.1.2	ko:K12323,ko:K12324	ANF_receptor,Ank_2,Guanylate_cyc,HNOBA,Pkinase,Pkinase_Tyr
g13499.t1	T	natriuretic peptide receptor 2	NPR2	GO:0000003,GO:0000166,GO:0001501,GO:0001653,GO:0001882,GO:0001883,GO:0003008,GO:0003013,GO:0003674,GO:0003824,GO:0004383,GO:0005488,GO:0005515,GO:0005524,GO:0005525,GO:0005575,GO:0005622,GO:0005623,GO:0005737,GO:0005829,GO:0005886,GO:0005887,GO:0006139,GO:0006163,GO:0006164,GO:0006182,GO:0006725,GO:0006753,GO:0006793,GO:0006796,GO:0006807,GO:0006935,GO:0007154,GO:0007165,GO:0007166,GO:0007167,GO:…	4.6.1.2	ko:K12323,ko:K12324,ko:K12325	ANF_receptor,Dimer_Tnp_hAT,Guanylate_cyc,HNOBA,Pkinase,Pkinase_Tyr
g13500.t1	S	G-protein coupled receptor activity	KISS1R	GO:0000186,GO:0001653,GO:0001932,GO:0001934,GO:0003674,GO:0004888,GO:0004930,GO:0005488,GO:0005575,GO:0005622,GO:0005623,GO:0005886,GO:0005887,GO:0006810,GO:0006811,GO:0006820,GO:0006869,GO:0007154,GO:0007165,GO:0007186,GO:0007200,GO:0007218,GO:0008150,GO:0008188,GO:0008285,GO:0008528,GO:0009893,GO:0009966,GO:0009967,GO:0009986,GO:0009987,GO:0010562,GO:0010604,GO:0010638,GO:0010646,GO:0010647,GO:…	-	ko:K04230,ko:K08374	7tm_1
g13501.t1	H	protein serine/threonine kinase activity	TLK2	GO:0003674,GO:0003824,GO:0004672,GO:0004674,GO:0005488,GO:0005515,GO:0005575,GO:0005622,GO:0005623,GO:0005634,GO:0005737,GO:0006464,GO:0006468,GO:0006793,GO:0006796,GO:0006807,GO:0008150,GO:0008152,GO:0009507,GO:0009536,GO:0009987,GO:0010468,GO:0016301,GO:0016310,GO:0016740,GO:0016772,GO:0016773,GO:0019222,GO:0019538,GO:0036211,GO:0042802,GO:0043170,GO:0043226,GO:0043227,GO:0043229,GO:0043231,GO:…	2.7.11.1	ko:K08864	ARL17,Myb_DNA-binding,Pkinase,SMC_N,SMC_hinge
g13667.t1	T	Adenylyl- / guanylyl cyclase, catalytic domain	-	-	4.6.1.2	ko:K12323,ko:K12324	ANF_receptor,Guanylate_cyc,Pkinase_Tyr
g13668.t1	T	Adenylyl- / guanylyl cyclase, catalytic domain	-	-	4.6.1.2	ko:K12323,ko:K12324	ANF_receptor,Guanylate_cyc,Pkinase_Tyr
g13670.t1	T	phosphorus-oxygen lyase activity. It is involved in the biological process described with	NPR2	GO:0000003,GO:0000166,GO:0001501,GO:0001558,GO:0001653,GO:0001882,GO:0001883,GO:0003008,GO:0003013,GO:0003014,GO:0003018,GO:0003674,GO:0003824,GO:0004383,GO:0004888,GO:0004930,GO:0005488,GO:0005515,GO:0005524,GO:0005525,GO:0005575,GO:0005622,GO:0005623,GO:0005737,GO:0005829,GO:0005886,GO:0005887,GO:0006139,GO:0006163,GO:0006164,GO:0006182,GO:0006584,GO:0006725,GO:0006753,GO:0006793,GO:0006796,GO:…	4.6.1.2	ko:K12323,ko:K12324	ANF_receptor,Dimer_Tnp_hAT,Guanylate_cyc,HNOBA,Pkinase,Pkinase_Tyr
g13671.t1	T	It is involved in the biological process described with	-	GO:0003674,GO:0003824,GO:0004383,GO:0005575,GO:0005622,GO:0005623,GO:0005737,GO:0005829,GO:0005886,GO:0005887,GO:0006139,GO:0006163,GO:0006164,GO:0006182,GO:0006725,GO:0006753,GO:0006793,GO:0006796,GO:0006807,GO:0007154,GO:0007165,GO:0008074,GO:0008150,GO:0008152,GO:0009058,GO:0009117,GO:0009150,GO:0009152,GO:0009165,GO:0009187,GO:0009190,GO:0009259,GO:0009260,GO:0009975,GO:0009987,GO:0016020,GO:…	4.6.1.2	ko:K12323,ko:K12324	ANF_receptor,Ank_2,Guanylate_cyc,HNOBA,Pkinase,Pkinase_Tyr
g13699.t1	T	receptor 1	GPR1	GO:0003674,GO:0004888,GO:0004930,GO:0005488,GO:0005575,GO:0005622,GO:0005623,GO:0005634,GO:0005654,GO:0005886,GO:0005887,GO:0007154,GO:0007165,GO:0007186,GO:0007187,GO:0007218,GO:0007267,GO:0007268,GO:0008150,GO:0009987,GO:0016020,GO:0016021,GO:0023052,GO:0031224,GO:0031226,GO:0031974,GO:0031981,GO:0033218,GO:0038023,GO:0042277,GO:0042923,GO:0042995,GO:0043005,GO:0043226,GO:0043227,GO:0043229,GO:…	-	ko:K04310	7tm_1
g13700.t1	O	Lipase	PNLIP	GO:0003008,GO:0003674,GO:0003824,GO:0004620,GO:0004806,GO:0005488,GO:0005509,GO:0005575,GO:0005576,GO:0005615,GO:0005622,GO:0005623,GO:0005737,GO:0006629,GO:0006643,GO:0006644,GO:0006664,GO:0006793,GO:0006796,GO:0006810,GO:0006869,GO:0006950,GO:0006952,GO:0006968,GO:0007275,GO:0007586,GO:0008150,GO:0008152,GO:0009056,GO:0009395,GO:0009605,GO:0009719,GO:0009725,GO:0009791,GO:0009987,GO:0009991,GO:…	3.1.1.3	ko:K14073,ko:K14074,ko:K14075	Lipase,PAX,PLAT
g13700.t2	O	Lipase	PNLIP	GO:0003008,GO:0003674,GO:0003824,GO:0004620,GO:0004806,GO:0005488,GO:0005509,GO:0005575,GO:0005576,GO:0005615,GO:0005622,GO:0005623,GO:0005737,GO:0006629,GO:0006643,GO:0006644,GO:0006664,GO:0006793,GO:0006796,GO:0006810,GO:0006869,GO:0006950,GO:0006952,GO:0006968,GO:0007275,GO:0007586,GO:0008150,GO:0008152,GO:0009056,GO:0009395,GO:0009605,GO:0009719,GO:0009725,GO:0009791,GO:0009987,GO:0009991,GO:…	3.1.1.3	ko:K14073,ko:K14074,ko:K14075	Lipase,PAX,PLAT
g13701.t1	T	Guanylate cyclase	Gucy2g	GO:0003674,GO:0003824,GO:0004383,GO:0005575,GO:0005622,GO:0005623,GO:0005737,GO:0005829,GO:0005886,GO:0006139,GO:0006163,GO:0006164,GO:0006182,GO:0006725,GO:0006753,GO:0006793,GO:0006796,GO:0006807,GO:0007154,GO:0007165,GO:0008074,GO:0008150,GO:0008152,GO:0009058,GO:0009117,GO:0009150,GO:0009152,GO:0009165,GO:0009187,GO:0009190,GO:0009259,GO:0009260,GO:0009897,GO:0009975,GO:0009986,GO:0009987,GO:…	4.6.1.2	ko:K12322,ko:K12323,ko:K12324	ANF_receptor,Guanylate_cyc,HNOBA,Pkinase,Pkinase_Tyr
g13703.t1	T	It is involved in the biological process described with	-	GO:0003674,GO:0003824,GO:0004383,GO:0005575,GO:0005622,GO:0005623,GO:0005737,GO:0005829,GO:0005886,GO:0005887,GO:0006139,GO:0006163,GO:0006164,GO:0006182,GO:0006725,GO:0006753,GO:0006793,GO:0006796,GO:0006807,GO:0007154,GO:0007165,GO:0008074,GO:0008150,GO:0008152,GO:0009058,GO:0009117,GO:0009150,GO:0009152,GO:0009165,GO:0009187,GO:0009190,GO:0009259,GO:0009260,GO:0009975,GO:0009987,GO:0016020,GO:…	4.6.1.2	ko:K12323,ko:K12324	ANF_receptor,Ank_2,Guanylate_cyc,HNOBA,Pkinase,Pkinase_Tyr
g13764.t1	T	Macrophage-stimulating protein receptor	MST1R	GO:0000003,GO:0001725,GO:0001932,GO:0001934,GO:0003674,GO:0003824,GO:0004672,GO:0004713,GO:0004714,GO:0004888,GO:0005011,GO:0005488,GO:0005515,GO:0005575,GO:0005622,GO:0005623,GO:0005737,GO:0005773,GO:0005856,GO:0005886,GO:0005887,GO:0006464,GO:0006468,GO:0006793,GO:0006796,GO:0006807,GO:0006950,GO:0006952,GO:0007154,GO:0007165,GO:0007166,GO:0007167,GO:0007169,GO:0007338,GO:0008150,GO:0008152,GO:…	2.7.10.1	ko:K05099,ko:K05100,ko:K08252	Actin,Gly_rich,Integrin_alpha2,Integrin_beta,Ldl_recept_a,MAM,PSI,Pkinase_Tyr,Sema,TIG,fn3
g13768.t1	J	It is involved in the biological process described with seryl-tRNA aminoacylation	SARS	GO:0000122,GO:0000166,GO:0000976,GO:0000977,GO:0000978,GO:0000987,GO:0001012,GO:0001046,GO:0001047,GO:0001067,GO:0001525,GO:0001568,GO:0001569,GO:0001763,GO:0001817,GO:0001818,GO:0001944,GO:0002009,GO:0002181,GO:0003674,GO:0003676,GO:0003677,GO:0003690,GO:0003723,GO:0003824,GO:0004812,GO:0004828,GO:0005488,GO:0005515,GO:0005524,GO:0005575,GO:0005622,GO:0005623,GO:0005634,GO:0005737,GO:0005829,GO:…	6.1.1.11	ko:K01875	7tm_2,Cadherin,DEP,DIX,Dishevelled,Dpy-30,Ependymin,GPS,Ham1p_like,IL17R_D_N,JAB,MitMem_reg,PDZ,Ras,SEFIR,Seryl_tRNA_N,Ureidogly_lyase,WHEP-TRS,tRNA-synt_2b
g13781.t1	E	dopamine beta-monooxygenase activity	moxd1	GO:0001505,GO:0003674,GO:0003824,GO:0004497,GO:0004500,GO:0005488,GO:0005507,GO:0005575,GO:0005576,GO:0005615,GO:0005622,GO:0005623,GO:0005737,GO:0006066,GO:0006576,GO:0006584,GO:0006589,GO:0006725,GO:0006807,GO:0008150,GO:0008152,GO:0009056,GO:0009058,GO:0009308,GO:0009309,GO:0009712,GO:0009713,GO:0009987,GO:0012505,GO:0012506,GO:0016020,GO:0016491,GO:0016705,GO:0016715,GO:0017144,GO:0018958,GO:…	1.14.17.1	ko:K00503,ko:K15266	Clat_adaptor_s,Cu2_monoox_C,Cu2_monooxygen,DOMON,RrnaAD
g13782.t1	E	dopamine beta-monooxygenase activity	moxd1	GO:0001505,GO:0003674,GO:0003824,GO:0004497,GO:0004500,GO:0005488,GO:0005507,GO:0005575,GO:0005576,GO:0005615,GO:0005622,GO:0005623,GO:0005737,GO:0006066,GO:0006576,GO:0006584,GO:0006589,GO:0006725,GO:0006807,GO:0008150,GO:0008152,GO:0009056,GO:0009058,GO:0009308,GO:0009309,GO:0009712,GO:0009713,GO:0009987,GO:0012505,GO:0012506,GO:0016020,GO:0016491,GO:0016705,GO:0016715,GO:0017144,GO:0018958,GO:…	1.14.17.1	ko:K00503,ko:K15266	Clat_adaptor_s,Cu2_monoox_C,Cu2_monooxygen,DOMON,RrnaAD
g13784.t1	S	MAP kinase kinase kinase activity	-	-	-	-	Pkinase
g13873.t1	T	Epidermal growth factor receptor kinase substrate 8-like	EPS8	GO:0000278,GO:0000280,GO:0001726,GO:0002009,GO:0002119,GO:0002164,GO:0002376,GO:0003008,GO:0003674,GO:0003779,GO:0005070,GO:0005488,GO:0005515,GO:0005575,GO:0005622,GO:0005623,GO:0005737,GO:0005829,GO:0005886,GO:0005887,GO:0005903,GO:0005938,GO:0006928,GO:0006996,GO:0007010,GO:0007015,GO:0007049,GO:0007154,GO:0007165,GO:0007166,GO:0007167,GO:0007169,GO:0007173,GO:0007264,GO:0007265,GO:0007266,GO:…	-	ko:K17277	Atg8,Fic,PTB,SAM_PNT,SH3_1,SH3_2,SH3_9
g14281.t1	T	phosphorus-oxygen lyase activity. It is involved in the biological process described with	NPR2	GO:0000003,GO:0000166,GO:0001501,GO:0001558,GO:0001653,GO:0001882,GO:0001883,GO:0003008,GO:0003013,GO:0003014,GO:0003018,GO:0003674,GO:0003824,GO:0004383,GO:0004888,GO:0004930,GO:0005488,GO:0005515,GO:0005524,GO:0005525,GO:0005575,GO:0005622,GO:0005623,GO:0005737,GO:0005829,GO:0005886,GO:0005887,GO:0006139,GO:0006163,GO:0006164,GO:0006182,GO:0006584,GO:0006725,GO:0006753,GO:0006793,GO:0006796,GO:…	4.6.1.2	ko:K12323,ko:K12324	ANF_receptor,Dimer_Tnp_hAT,Guanylate_cyc,HNOBA,Pkinase,Pkinase_Tyr
g14342.t1	T	It is involved in the biological process described with	-	GO:0003674,GO:0003824,GO:0004383,GO:0005575,GO:0005622,GO:0005623,GO:0005737,GO:0005829,GO:0005886,GO:0005887,GO:0006139,GO:0006163,GO:0006164,GO:0006182,GO:0006725,GO:0006753,GO:0006793,GO:0006796,GO:0006807,GO:0007154,GO:0007165,GO:0008074,GO:0008150,GO:0008152,GO:0009058,GO:0009117,GO:0009150,GO:0009152,GO:0009165,GO:0009187,GO:0009190,GO:0009259,GO:0009260,GO:0009975,GO:0009987,GO:0016020,GO:…	4.6.1.2	ko:K12323,ko:K12324	ANF_receptor,Ank_2,Guanylate_cyc,HNOBA,Pkinase,Pkinase_Tyr
g14345.t1	S	Plays a role in the sugar gustatory response	Gr1	-	-	ko:K08471	Trehalose_recp
g14573.t1	O	Zinc-dependent metalloprotease	MEP1B	GO:0003674,GO:0003824,GO:0004175,GO:0004222,GO:0005488,GO:0005515,GO:0005575,GO:0005623,GO:0005886,GO:0005887,GO:0006508,GO:0006807,GO:0006810,GO:0007275,GO:0007610,GO:0007631,GO:0008150,GO:0008152,GO:0008233,GO:0008237,GO:0016020,GO:0016021,GO:0016787,GO:0017090,GO:0019538,GO:0031224,GO:0031226,GO:0032501,GO:0032502,GO:0032991,GO:0035295,GO:0042755,GO:0042802,GO:0043050,GO:0043170,GO:0044238,GO:…	3.4.24.21,3.4.24.63	ko:K08076,ko:K08606	Astacin,EGF,Histone,MAM,ShK,TSP_1,Trypsin
g14574.t1	L	hAT family C-terminal dimerisation region	-	-	-	-	DDE_Tnp_1_7,DUF659,Dimer_Tnp_hAT,Exo_endo_phos_2,PRE_C2HC,RVT_1,RVT_3,zf-BED
g14575.t1	S	CVNH domain	-	-	-	-	CVNH,Rick_17kDa_Anti
g14576.t1	O	Astacin-like metalloendopeptidase	ASTL	GO:0000003,GO:0001775,GO:0003674,GO:0003824,GO:0004175,GO:0004222,GO:0005575,GO:0005622,GO:0005623,GO:0005737,GO:0005886,GO:0006508,GO:0006807,GO:0007155,GO:0007275,GO:0007338,GO:0007343,GO:0007610,GO:0007631,GO:0008150,GO:0008152,GO:0008233,GO:0008237,GO:0009566,GO:0009893,GO:0009987,GO:0010468,GO:0010604,GO:0010628,GO:0010954,GO:0012505,GO:0016020,GO:0016787,GO:0019222,GO:0019538,GO:0019953,GO:…	3.4.24.21	ko:K08076,ko:K08778	Astacin,CUB,F5_F8_type_C,Innexin,Laminin_G_3,Lectin_C,MAM,Methyltransf_FA,Ricin_B_lectin,ShK,TSP_1,VWD
g14577.t1	O	Astacin-like metalloendopeptidase	ASTL	GO:0000003,GO:0001775,GO:0003674,GO:0003824,GO:0004175,GO:0004222,GO:0005575,GO:0005622,GO:0005623,GO:0005737,GO:0005886,GO:0006508,GO:0006807,GO:0007155,GO:0007275,GO:0007338,GO:0007343,GO:0007610,GO:0007631,GO:0008150,GO:0008152,GO:0008233,GO:0008237,GO:0009566,GO:0009893,GO:0009987,GO:0010468,GO:0010604,GO:0010628,GO:0010954,GO:0012505,GO:0016020,GO:0016787,GO:0019222,GO:0019538,GO:0019953,GO:…	3.4.24.21	ko:K08076,ko:K08778	Astacin,CUB,F5_F8_type_C,Innexin,Laminin_G_3,Lectin_C,MAM,Methyltransf_FA,Ricin_B_lectin,ShK,TSP_1,VWD
g14804.t1	OP	acidic dipeptidase 2	NAALAD2	GO:0001505,GO:0003674,GO:0003824,GO:0004177,GO:0004180,GO:0004181,GO:0005575,GO:0005623,GO:0005886,GO:0006082,GO:0006508,GO:0006520,GO:0006807,GO:0008150,GO:0008152,GO:0008233,GO:0008235,GO:0008236,GO:0008237,GO:0008238,GO:0008239,GO:0008652,GO:0009056,GO:0009058,GO:0009987,GO:0016020,GO:0016021,GO:0016053,GO:0016787,GO:0016805,GO:0016810,GO:0016811,GO:0017171,GO:0019538,GO:0019752,GO:0031224,GO:…	3.4.17.21	ko:K01301	PA,Peptidase_M28,RVT_1,TFR_dimer
g14806.t1	S	Ion channel regulatory protein UNC-93	MFSD11	-	-	-	DX,MFS_1,RGS,Tom22,UNC-93
g14808.t1	OP	N-acetylated alpha-linked acidic dipeptidase 2	-	GO:0003674,GO:0003824,GO:0004180,GO:0004181,GO:0005575,GO:0006508,GO:0006807,GO:0008150,GO:0008152,GO:0008233,GO:0008235,GO:0008237,GO:0008238,GO:0016020,GO:0016787,GO:0019538,GO:0043170,GO:0044238,GO:0070011,GO:0071704,GO:0140096,GO:1901564	3.4.17.21	ko:K01301	PA,Peptidase_M28,RVT_1,TFR_dimer
g14945.t1	S	C-terminal domain of apextrin	-	-	-	-	ApeC,CUB,MACPF
g14946.t1	T	Natriuretic peptide receptor	NPR1	GO:0000166,GO:0001558,GO:0001653,GO:0001882,GO:0001883,GO:0003008,GO:0003013,GO:0003014,GO:0003018,GO:0003674,GO:0003824,GO:0004383,GO:0004888,GO:0004930,GO:0005488,GO:0005515,GO:0005525,GO:0005575,GO:0005622,GO:0005623,GO:0005737,GO:0005829,GO:0005886,GO:0005887,GO:0006139,GO:0006163,GO:0006164,GO:0006182,GO:0006584,GO:0006725,GO:0006753,GO:0006793,GO:0006796,GO:0006807,GO:0006810,GO:0006935,GO:…	4.6.1.2	ko:K12323,ko:K12324,ko:K12325,ko:K13140	ANF_receptor,Dimer_Tnp_hAT,Guanylate_cyc,HNOBA,Ints3,Pkinase,Pkinase_Tyr
g14946.t2	T	Natriuretic peptide receptor	NPR1	GO:0000166,GO:0001558,GO:0001653,GO:0001882,GO:0001883,GO:0003008,GO:0003013,GO:0003014,GO:0003018,GO:0003674,GO:0003824,GO:0004383,GO:0004888,GO:0004930,GO:0005488,GO:0005515,GO:0005525,GO:0005575,GO:0005622,GO:0005623,GO:0005737,GO:0005829,GO:0005886,GO:0005887,GO:0006139,GO:0006163,GO:0006164,GO:0006182,GO:0006584,GO:0006725,GO:0006753,GO:0006793,GO:0006796,GO:0006807,GO:0006810,GO:0006935,GO:…	4.6.1.2	ko:K12323,ko:K12324,ko:K12325,ko:K13140	ANF_receptor,Dimer_Tnp_hAT,Guanylate_cyc,HNOBA,Ints3,Pkinase,Pkinase_Tyr
g14946.t3	T	Natriuretic peptide receptor 1	NPR1	GO:0000166,GO:0001558,GO:0001653,GO:0001882,GO:0001883,GO:0003008,GO:0003013,GO:0003014,GO:0003018,GO:0003674,GO:0003824,GO:0004383,GO:0004888,GO:0004930,GO:0005488,GO:0005515,GO:0005525,GO:0005575,GO:0005622,GO:0005623,GO:0005737,GO:0005829,GO:0005886,GO:0005887,GO:0006139,GO:0006163,GO:0006164,GO:0006182,GO:0006584,GO:0006725,GO:0006753,GO:0006793,GO:0006796,GO:0006807,GO:0006810,GO:0006935,GO:…	4.6.1.2	ko:K12323,ko:K12324,ko:K12325,ko:K13140	ANF_receptor,Dimer_Tnp_hAT,Guanylate_cyc,HNOBA,Ints3,Pkinase,Pkinase_Tyr
g14947.t1	-	-	-	-	-	-	-
g15393.t1	T	It is involved in the biological process described with	-	GO:0003674,GO:0003824,GO:0004383,GO:0005575,GO:0005622,GO:0005623,GO:0005737,GO:0005829,GO:0005886,GO:0005887,GO:0006139,GO:0006163,GO:0006164,GO:0006182,GO:0006725,GO:0006753,GO:0006793,GO:0006796,GO:0006807,GO:0007154,GO:0007165,GO:0008074,GO:0008150,GO:0008152,GO:0009058,GO:0009117,GO:0009150,GO:0009152,GO:0009165,GO:0009187,GO:0009190,GO:0009259,GO:0009260,GO:0009975,GO:0009987,GO:0016020,GO:…	4.6.1.2	ko:K12323,ko:K12324	ANF_receptor,Ank_2,Guanylate_cyc,HNOBA,Pkinase,Pkinase_Tyr
g15393.t2	T	It is involved in the biological process described with	-	GO:0003674,GO:0003824,GO:0004383,GO:0005575,GO:0005622,GO:0005623,GO:0005737,GO:0005829,GO:0005886,GO:0005887,GO:0006139,GO:0006163,GO:0006164,GO:0006182,GO:0006725,GO:0006753,GO:0006793,GO:0006796,GO:0006807,GO:0007154,GO:0007165,GO:0008074,GO:0008150,GO:0008152,GO:0009058,GO:0009117,GO:0009150,GO:0009152,GO:0009165,GO:0009187,GO:0009190,GO:0009259,GO:0009260,GO:0009975,GO:0009987,GO:0016020,GO:…	4.6.1.2	ko:K12323,ko:K12324	ANF_receptor,Ank_2,Guanylate_cyc,HNOBA,Pkinase,Pkinase_Tyr
g15502.t1	T	ATP binding. It is involved in the biological process described with protein phosphorylation	KDR	GO:0000003,GO:0000165,GO:0000166,GO:0000186,GO:0000902,GO:0000904,GO:0001101,GO:0001525,GO:0001541,GO:0001558,GO:0001568,GO:0001569,GO:0001570,GO:0001654,GO:0001655,GO:0001666,GO:0001667,GO:0001763,GO:0001817,GO:0001818,GO:0001819,GO:0001889,GO:0001894,GO:0001932,GO:0001934,GO:0001936,GO:0001937,GO:0001938,GO:0001944,GO:0001945,GO:0001946,GO:0001952,GO:0001954,GO:0002009,GO:0002040,GO:0002042,GO:…	2.7.10.1,3.4.21.109	ko:K04362,ko:K05089,ko:K05093,ko:K05096,ko:K05097,ko:K05098,ko:K08670	CUB,I-set,Ig_2,Ig_3,Ldl_recept_a,Pkinase_Tyr,Trypsin,V-set,ig
g15503.t1	F	Equilibrative nucleoside transporter	SLC29A1	GO:0000322,GO:0000323,GO:0000324,GO:0000329,GO:0001666,GO:0001678,GO:0003008,GO:0003674,GO:0005215,GO:0005337,GO:0005575,GO:0005622,GO:0005623,GO:0005634,GO:0005730,GO:0005737,GO:0005773,GO:0005774,GO:0005886,GO:0005887,GO:0006139,GO:0006725,GO:0006807,GO:0006810,GO:0006863,GO:0006950,GO:0007154,GO:0007165,GO:0007166,GO:0007267,GO:0007268,GO:0007275,GO:0007589,GO:0007595,GO:0008150,GO:0008152,GO:…	-	ko:K03323,ko:K15014	Bud13,Nucleoside_tran,Pinin_SDK_memA,p450
g15504.t1	EPT	extracellularly glutamate-gated ion channel activity	GRID2	GO:0001964,GO:0003008,GO:0003674,GO:0004888,GO:0005488,GO:0005515,GO:0005575,GO:0005623,GO:0005886,GO:0005887,GO:0007154,GO:0007155,GO:0007157,GO:0007165,GO:0007166,GO:0007215,GO:0007267,GO:0007268,GO:0007275,GO:0007399,GO:0007416,GO:0007417,GO:0007420,GO:0008066,GO:0008104,GO:0008150,GO:0008328,GO:0009605,GO:0009653,GO:0009987,GO:0010646,GO:0010941,GO:0010975,GO:0014069,GO:0016020,GO:0016021,GO:…	-	ko:K05206,ko:K05207	ANF_receptor,Lig_chan,Lig_chan-Glu_bd,RVT_1,SBP_bac_3
g15526.t1	T	Atrial natriuretic peptide receptor	NPR1	GO:0000166,GO:0001558,GO:0001653,GO:0001882,GO:0001883,GO:0003008,GO:0003013,GO:0003014,GO:0003018,GO:0003674,GO:0003824,GO:0004383,GO:0004888,GO:0004930,GO:0005488,GO:0005515,GO:0005525,GO:0005575,GO:0005622,GO:0005623,GO:0005737,GO:0005829,GO:0005886,GO:0005887,GO:0006139,GO:0006163,GO:0006164,GO:0006182,GO:0006584,GO:0006725,GO:0006753,GO:0006793,GO:0006796,GO:0006807,GO:0006810,GO:0006935,GO:…	4.6.1.2	ko:K12323,ko:K12324,ko:K12325,ko:K13140	ANF_receptor,Dimer_Tnp_hAT,Guanylate_cyc,HNOBA,Ints3,Pkinase,Pkinase_Tyr
g15528.t1	T	natriuretic peptide receptor activity	NPR1	GO:0000166,GO:0001558,GO:0001653,GO:0001882,GO:0001883,GO:0003008,GO:0003013,GO:0003014,GO:0003018,GO:0003674,GO:0003824,GO:0004383,GO:0004888,GO:0004930,GO:0005488,GO:0005515,GO:0005525,GO:0005575,GO:0005622,GO:0005623,GO:0005737,GO:0005829,GO:0005886,GO:0005887,GO:0006139,GO:0006163,GO:0006164,GO:0006182,GO:0006584,GO:0006725,GO:0006753,GO:0006793,GO:0006796,GO:0006807,GO:0006810,GO:0006935,GO:…	4.6.1.2	ko:K12323,ko:K12324,ko:K12325	ANF_receptor,Dimer_Tnp_hAT,Guanylate_cyc,HNOBA,Pkinase,Pkinase_Tyr
g15529.t1	CG	UDP-glycosyltransferase 72E1-like	-	-	2.4.1.218	ko:K08237	Acyltransferase,UDPGT
g26.t1	-	-	-	-	-	-	-
g27.t1	V	Belongs to the serpin family	SERPINB1	GO:0001775,GO:0002252,GO:0002263,GO:0002274,GO:0002275,GO:0002283,GO:0002366,GO:0002376,GO:0002443,GO:0002444,GO:0002446,GO:0003674,GO:0004857,GO:0004866,GO:0004867,GO:0005575,GO:0005576,GO:0005615,GO:0005622,GO:0005623,GO:0005737,GO:0006810,GO:0006887,GO:0006955,GO:0008150,GO:0009892,GO:0009894,GO:0009987,GO:0010466,GO:0010605,GO:0010951,GO:0012505,GO:0016192,GO:0019222,GO:0030141,GO:0030162,GO:…	-	ko:K13963	Serpin
g113.t1	T	Serine/Threonine protein kinases, catalytic domain	MAP3K4	GO:0000003,GO:0000131,GO:0000160,GO:0000161,GO:0000165,GO:0000166,GO:0000186,GO:0001672,GO:0001708,GO:0001890,GO:0001932,GO:0001934,GO:0002251,GO:0002376,GO:0002385,GO:0003002,GO:0003006,GO:0003674,GO:0003779,GO:0003824,GO:0004672,GO:0004674,GO:0004690,GO:0004691,GO:0004709,GO:0004713,GO:0005488,GO:0005515,GO:0005524,GO:0005575,GO:0005622,GO:0005623,GO:0005737,GO:0005829,GO:0005933,GO:0005934,GO:…	2.7.11.25	ko:K04428,ko:K11230	CCDC142,CHCH,FNIP,MATH,PAS,Pkinase
g114.t1	T	mitogen-activated protein kinase kinase kinase 5	MAP3K5	GO:0000003,GO:0000165,GO:0000166,GO:0000186,GO:0000187,GO:0000287,GO:0000302,GO:0001932,GO:0001934,GO:0002225,GO:0002376,GO:0002682,GO:0002684,GO:0002697,GO:0002699,GO:0002700,GO:0002702,GO:0002759,GO:0002760,GO:0002784,GO:0002831,GO:0002833,GO:0002920,GO:0002922,GO:0003674,GO:0003824,GO:0004672,GO:0004674,GO:0004709,GO:0005488,GO:0005515,GO:0005524,GO:0005575,GO:0005622,GO:0005623,GO:0005737,GO:…	2.7.11.25	ko:K04425,ko:K04426,ko:K13986	ANF_receptor,CH,Calponin,DUF4071,EGF,EGF_CA,Guanylate_cyc,Laminin_G_1,Laminin_G_2,MAP7,Pkinase,Pkinase_Tyr,SAM_2,hEGF
g183.t1	G	It is involved in the biological process described with transmembrane transport	-	GO:0003674,GO:0005215,GO:0005575,GO:0005623,GO:0005886,GO:0006810,GO:0006811,GO:0006820,GO:0008150,GO:0016020,GO:0016021,GO:0022857,GO:0031224,GO:0044425,GO:0044464,GO:0051179,GO:0051234,GO:0055085,GO:0071944	-	ko:K08193,ko:K12301	MFS_1,Pro_isomerase
g184.t1	S	Aralkyl acyl-CoA:amino acid N-acyltransferase	-	-	-	-	Acetyltransf_10,FR47,Gly_acyl_tr_C,Gly_acyl_tr_N
g185.t1	T	Adenylyl- / guanylyl cyclase, catalytic domain	-	GO:0003674,GO:0003824,GO:0004383,GO:0005575,GO:0005622,GO:0005623,GO:0005737,GO:0005829,GO:0005886,GO:0005887,GO:0006139,GO:0006163,GO:0006164,GO:0006182,GO:0006725,GO:0006753,GO:0006793,GO:0006796,GO:0006807,GO:0007154,GO:0007165,GO:0008074,GO:0008150,GO:0008152,GO:0009058,GO:0009117,GO:0009150,GO:0009152,GO:0009165,GO:0009187,GO:0009190,GO:0009259,GO:0009260,GO:0009975,GO:0009987,GO:0016020,GO:…	4.6.1.2	ko:K12323,ko:K12324	ANF_receptor,Ank_2,Guanylate_cyc,HNOBA,Pkinase,Pkinase_Tyr
g192.t1	T	It is involved in the biological process described with	-	GO:0003674,GO:0003824,GO:0004383,GO:0005575,GO:0005622,GO:0005623,GO:0005737,GO:0005829,GO:0005886,GO:0005887,GO:0006139,GO:0006163,GO:0006164,GO:0006182,GO:0006725,GO:0006753,GO:0006793,GO:0006796,GO:0006807,GO:0007154,GO:0007165,GO:0008074,GO:0008150,GO:0008152,GO:0009058,GO:0009117,GO:0009150,GO:0009152,GO:0009165,GO:0009187,GO:0009190,GO:0009259,GO:0009260,GO:0009975,GO:0009987,GO:0016020,GO:…	4.6.1.2	ko:K12323,ko:K12324	ANF_receptor,Ank_2,Guanylate_cyc,HNOBA,Pkinase,Pkinase_Tyr
g193.t1	O	Protease, serine 56	PRSS56	GO:0001654,GO:0003674,GO:0003824,GO:0004175,GO:0004252,GO:0005575,GO:0005622,GO:0005623,GO:0005737,GO:0005783,GO:0006508,GO:0006807,GO:0007275,GO:0007423,GO:0008150,GO:0008152,GO:0008233,GO:0008236,GO:0012505,GO:0016787,GO:0017171,GO:0019538,GO:0032501,GO:0032502,GO:0043010,GO:0043170,GO:0043226,GO:0043227,GO:0043229,GO:0043231,GO:0044238,GO:0044424,GO:0044444,GO:0044464,GO:0048513,GO:0048731,GO:…	-	-	TSP_1,Trypsin
g220.t1	T	Adenylyl- / guanylyl cyclase, catalytic domain	-	-	-	-	Guanylate_cyc,HNOBA,NIT
g294.t1	O	serine-type endopeptidase activity	CLIPD3	GO:0003674,GO:0003824,GO:0004175,GO:0004252,GO:0006508,GO:0006807,GO:0008150,GO:0008152,GO:0008233,GO:0008236,GO:0009605,GO:0009607,GO:0009620,GO:0016787,GO:0017171,GO:0019538,GO:0043170,GO:0043207,GO:0044238,GO:0050896,GO:0051704,GO:0051707,GO:0070011,GO:0071704,GO:0140096,GO:1901564	-	ko:K09640	CLIP,Trypsin
g296.t1	S	C-terminal domain of apextrin	-	-	-	-	ApeC,MACPF
g297.t1	T	Natriuretic peptide receptor	NPR1	GO:0000166,GO:0001558,GO:0001653,GO:0001882,GO:0001883,GO:0003008,GO:0003013,GO:0003014,GO:0003018,GO:0003674,GO:0003824,GO:0004383,GO:0004888,GO:0004930,GO:0005488,GO:0005515,GO:0005525,GO:0005575,GO:0005622,GO:0005623,GO:0005737,GO:0005829,GO:0005886,GO:0005887,GO:0006139,GO:0006163,GO:0006164,GO:0006182,GO:0006584,GO:0006725,GO:0006753,GO:0006793,GO:0006796,GO:0006807,GO:0006810,GO:0006935,GO:…	4.6.1.2	ko:K12323,ko:K12324,ko:K12325,ko:K13140	ANF_receptor,Dimer_Tnp_hAT,Guanylate_cyc,HNOBA,Ints3,Pkinase,Pkinase_Tyr
g364.t1	EPT	regulation of synaptic vesicle fusion to presynaptic active zone membrane	GRIK5	GO:0001505,GO:0001678,GO:0003008,GO:0003674,GO:0004888,GO:0004970,GO:0005215,GO:0005216,GO:0005230,GO:0005261,GO:0005267,GO:0005272,GO:0005488,GO:0005515,GO:0005575,GO:0005622,GO:0005623,GO:0005634,GO:0005737,GO:0005783,GO:0005886,GO:0005887,GO:0006621,GO:0006810,GO:0006811,GO:0006812,GO:0006813,GO:0006814,GO:0007154,GO:0007165,GO:0007166,GO:0007215,GO:0007267,GO:0007268,GO:0008066,GO:0008104,GO:…	-	ko:K05201,ko:K05202,ko:K05203,ko:K05204,ko:K05205,ko:K05313	ANF_receptor,Lig_chan,Lig_chan-Glu_bd,SBP_bac_3
g393.t1	S	MAP kinase kinase kinase activity	-	-	2.7.11.1,2.7.11.25	ko:K04420,ko:K08269,ko:K08857,ko:K13412	EF-hand_1,EF-hand_5,EF-hand_7,Pkinase
g451.t1	T	von Willebrand factor (vWF) type A domain	-	-	-	ko:K16630	HH_signal,Ig_3,VWA
g454.t1	G	GDP-L-fucose salvage	FUK	GO:0003674,GO:0003824,GO:0005575,GO:0005622,GO:0005623,GO:0005737,GO:0005829,GO:0005975,GO:0006139,GO:0006725,GO:0006753,GO:0006793,GO:0006796,GO:0006807,GO:0008150,GO:0008152,GO:0009058,GO:0009117,GO:0009165,GO:0009225,GO:0009226,GO:0009987,GO:0016301,GO:0016310,GO:0016740,GO:0016772,GO:0016773,GO:0016779,GO:0018130,GO:0019438,GO:0019637,GO:0034641,GO:0034654,GO:0042350,GO:0042352,GO:0043094,GO:…	2.7.1.52,2.7.7.30	ko:K00976,ko:K05305	AMPK1_CBM,Actin,DSPc,Fucokinase,GHMP_kinases_C,GHMP_kinases_N,LRR_8,LSM
g531.t1	T	Kelch-like family member 35	KLHL35	GO:0000151,GO:0005575,GO:0005622,GO:0005623,GO:0031461,GO:0031463,GO:0032991,GO:0044424,GO:0044464,GO:1902494,GO:1990234	-	ko:K10444,ko:K10448,ko:K10461,ko:K13959	ATP-gua_Ptrans,ATP-gua_PtransN,BACK,BTB,Cofilin_ADF,DUF4743,GTP_EFTU,GTP_EFTU_D2,G_glu_transpept,Kelch_1,Kelch_2,Kelch_6,LRAT,NUDIX,Ribosomal_L44
g533.t1	T	Protein tyrosine kinase	-	-	2.7.11.1,2.7.11.25	ko:K04420,ko:K08269,ko:K08857,ko:K13412	EF-hand_1,EF-hand_5,EF-hand_7,Pkinase
g535.t1	T	Mitogen-Activated Protein Kinase Kinase Kinase	-	GO:0000165,GO:0000186,GO:0001101,GO:0001932,GO:0001934,GO:0003674,GO:0003676,GO:0003677,GO:0003700,GO:0003824,GO:0004672,GO:0004674,GO:0004709,GO:0005488,GO:0005515,GO:0005575,GO:0005622,GO:0005623,GO:0005634,GO:0005737,GO:0005768,GO:0005886,GO:0006355,GO:0006464,GO:0006468,GO:0006793,GO:0006796,GO:0006807,GO:0006950,GO:0006970,GO:0007154,GO:0007165,GO:0007275,GO:0007346,GO:0007584,GO:0008150,GO:…	2.7.11.25	ko:K13414,ko:K20605	CaATP_NAI,Calmodulin_bind,LRR_3,NB-ARC,PAH,Pkinase,TIR,WRKY
g536.t1	T	camp-dependent protein kinase	TPK2	GO:0000075,GO:0000077,GO:0000086,GO:0000166,GO:0000226,GO:0000228,GO:0000278,GO:0000322,GO:0000323,GO:0000324,GO:0000775,GO:0000779,GO:0000780,GO:0000785,GO:0000790,GO:0000793,GO:0000794,GO:0000922,GO:0001403,GO:0001678,GO:0001889,GO:0003674,GO:0003824,GO:0004672,GO:0004674,GO:0004690,GO:0004691,GO:0004712,GO:0005488,GO:0005515,GO:0005524,GO:0005575,GO:0005622,GO:0005623,GO:0005634,GO:0005654,GO:…	2.7.11.11	ko:K04345,ko:K19584	Hydrolase_4,Pam17,Pkinase,Pkinase_Tyr,Pyr_redox_2
g691.t1	O	G-protein coupled receptor activity	-	-	-	-	7tm_1,LRR_6,Sushi,Thioredoxin,WSC
g696.t1	T	Kinase-like	MAP2K4	GO:0000165,GO:0000166,GO:0000187,GO:0001558,GO:0001932,GO:0001934,GO:0003008,GO:0003012,GO:0003298,GO:0003300,GO:0003301,GO:0003674,GO:0003824,GO:0004672,GO:0004674,GO:0004708,GO:0004712,GO:0005488,GO:0005515,GO:0005524,GO:0005575,GO:0005622,GO:0005623,GO:0005634,GO:0005737,GO:0005829,GO:0006275,GO:0006464,GO:0006468,GO:0006793,GO:0006796,GO:0006807,GO:0006950,GO:0007154,GO:0007165,GO:0007254,GO:…	2.7.12.2	ko:K04430	Pkinase
g697.t1	T	guanylate cyclase activity	-	GO:0003674,GO:0003824,GO:0004383,GO:0005575,GO:0005622,GO:0005623,GO:0005737,GO:0005829,GO:0005886,GO:0005887,GO:0006139,GO:0006163,GO:0006164,GO:0006182,GO:0006725,GO:0006753,GO:0006793,GO:0006796,GO:0006807,GO:0007154,GO:0007165,GO:0008074,GO:0008150,GO:0008152,GO:0009058,GO:0009117,GO:0009150,GO:0009152,GO:0009165,GO:0009187,GO:0009190,GO:0009259,GO:0009260,GO:0009975,GO:0009987,GO:0016020,GO:…	4.6.1.2	ko:K12323,ko:K12324,ko:K12325	ANF_receptor,Ank_2,Guanylate_cyc,HNOBA,Pkinase,Pkinase_Tyr
g698.t1	S	Coiled-coil domain-containing protein	CCDC42	GO:0000003,GO:0000226,GO:0001578,GO:0003006,GO:0003341,GO:0003674,GO:0005488,GO:0005575,GO:0005622,GO:0005623,GO:0005737,GO:0005856,GO:0005929,GO:0005930,GO:0006928,GO:0006996,GO:0007010,GO:0007017,GO:0007018,GO:0007276,GO:0007281,GO:0007283,GO:0007286,GO:0008150,GO:0009987,GO:0016043,GO:0019953,GO:0022412,GO:0022414,GO:0022607,GO:0030030,GO:0030031,GO:0030154,GO:0031514,GO:0032501,GO:0032502,GO:…	-	-	DUF4200
g699.t1	T	It is involved in the biological process described with	-	GO:0003674,GO:0003824,GO:0004383,GO:0005575,GO:0005622,GO:0005623,GO:0005737,GO:0005829,GO:0005886,GO:0005887,GO:0006139,GO:0006163,GO:0006164,GO:0006182,GO:0006725,GO:0006753,GO:0006793,GO:0006796,GO:0006807,GO:0007154,GO:0007165,GO:0008074,GO:0008150,GO:0008152,GO:0009058,GO:0009117,GO:0009150,GO:0009152,GO:0009165,GO:0009187,GO:0009190,GO:0009259,GO:0009260,GO:0009975,GO:0009987,GO:0016020,GO:…	4.6.1.2	ko:K12323,ko:K12324	ANF_receptor,Ank_2,Guanylate_cyc,HNOBA,Pkinase,Pkinase_Tyr
g715.t1	S	Leucine rich repeat	LRRC20	GO:0003008,GO:0003012,GO:0008150,GO:0032501	-	ko:K04240	7tm_1,G-patch,LRR_1,LRR_4,LRR_6,LRR_8
g716.t1	A	protein modification by small protein conjugation	MARCH4	GO:0003674,GO:0003824,GO:0004842,GO:0005575,GO:0005622,GO:0005623,GO:0005737,GO:0005794,GO:0005795,GO:0005802,GO:0006464,GO:0006807,GO:0008150,GO:0008152,GO:0009987,GO:0012505,GO:0016567,GO:0016740,GO:0019538,GO:0019787,GO:0031984,GO:0032446,GO:0036211,GO:0043170,GO:0043226,GO:0043227,GO:0043229,GO:0043231,GO:0043412,GO:0044237,GO:0044238,GO:0044260,GO:0044267,GO:0044422,GO:0044424,GO:0044431,GO:…	2.3.2.27	ko:K10656,ko:K10659,ko:K10661	HTH_psq,RINGv,UDPGT
g821.t1	T	It is involved in the biological process described with	-	GO:0003674,GO:0003824,GO:0004383,GO:0005575,GO:0005622,GO:0005623,GO:0005737,GO:0005829,GO:0005886,GO:0005887,GO:0006139,GO:0006163,GO:0006164,GO:0006182,GO:0006725,GO:0006753,GO:0006793,GO:0006796,GO:0006807,GO:0007154,GO:0007165,GO:0008074,GO:0008150,GO:0008152,GO:0009058,GO:0009117,GO:0009150,GO:0009152,GO:0009165,GO:0009187,GO:0009190,GO:0009259,GO:0009260,GO:0009975,GO:0009987,GO:0016020,GO:…	4.6.1.2	ko:K12323,ko:K12324	ANF_receptor,Ank_2,Guanylate_cyc,HNOBA,Pkinase,Pkinase_Tyr
g822.t1	S	Chitin binding Peritrophin-A domain	-	-	-	-	CBM_14
g823.t1	S	7 transmembrane receptor (rhodopsin family)	-	-	-	ko:K05051	7tm_1
g824.t1	T	Mitogen-Activated Protein Kinase Kinase Kinase	-	GO:0000165,GO:0000186,GO:0001101,GO:0001932,GO:0001934,GO:0003674,GO:0003676,GO:0003677,GO:0003700,GO:0003824,GO:0004672,GO:0004674,GO:0004709,GO:0005488,GO:0005515,GO:0005575,GO:0005622,GO:0005623,GO:0005634,GO:0005737,GO:0005768,GO:0005886,GO:0006355,GO:0006464,GO:0006468,GO:0006793,GO:0006796,GO:0006807,GO:0006950,GO:0006970,GO:0007154,GO:0007165,GO:0007275,GO:0007346,GO:0007584,GO:0008150,GO:…	2.7.11.25	ko:K13414,ko:K20605	CaATP_NAI,Calmodulin_bind,LRR_3,NB-ARC,PAH,Pkinase,TIR,WRKY
g827.t1	M	apolipoprotein	-	-	-	ko:K03098,ko:K18271	Lipocalin,Lipocalin_2,Triabin
g829.t1	S	Kazal type serine protease inhibitors	-	-	-	-	Kazal_1
g984.t1	TV	C-type lectin (CTL) or carbohydrate-recognition domain (CRD)	CTLSE1	GO:0001654,GO:0001736,GO:0001738,GO:0001745,GO:0002009,GO:0002165,GO:0003674,GO:0005488,GO:0005575,GO:0005911,GO:0007155,GO:0007156,GO:0007163,GO:0007164,GO:0007275,GO:0007399,GO:0007423,GO:0007444,GO:0007472,GO:0007476,GO:0007552,GO:0007560,GO:0008150,GO:0008544,GO:0009653,GO:0009791,GO:0009886,GO:0009887,GO:0009888,GO:0009913,GO:0009987,GO:0016043,GO:0022008,GO:0022610,GO:0030030,GO:0030054,GO:…	-	ko:K17495	Collagen,EGF,EGF_CA,F5_F8_type_C,Lectin_C,MAM,PAN_1,Sushi,WAP
g985.t1	G	Fringe-like	C1GALT1	GO:0000003,GO:0000139,GO:0001525,GO:0001568,GO:0001655,GO:0001822,GO:0001944,GO:0002064,GO:0002065,GO:0002066,GO:0002682,GO:0002683,GO:0003674,GO:0003824,GO:0005575,GO:0005622,GO:0005623,GO:0005737,GO:0005794,GO:0005795,GO:0005797,GO:0006464,GO:0006486,GO:0006493,GO:0006629,GO:0006643,GO:0006664,GO:0006807,GO:0007275,GO:0007399,GO:0007417,GO:0007528,GO:0008150,GO:0008152,GO:0008378,GO:0008610,GO:…	2.4.1.122	ko:K00731	CENP-T_C,Fringe,PRKCSH,Trypsin
g986.t1	S	von Willebrand factor type A domain	VWA5A	GO:0005575,GO:0005622,GO:0005623,GO:0005634,GO:0005654,GO:0031974,GO:0031981,GO:0043226,GO:0043227,GO:0043229,GO:0043231,GO:0043233,GO:0044422,GO:0044424,GO:0044428,GO:0044446,GO:0044464,GO:0070013	-	-	GSP_synth,Nucleoporin_FG,UBA_4,VIT,VIT_2,VWA_2,VWA_3
g1012.t1	T	It is involved in the biological process described with	-	GO:0003674,GO:0003824,GO:0004383,GO:0005575,GO:0005622,GO:0005623,GO:0005737,GO:0005829,GO:0005886,GO:0005887,GO:0006139,GO:0006163,GO:0006164,GO:0006182,GO:0006725,GO:0006753,GO:0006793,GO:0006796,GO:0006807,GO:0007154,GO:0007165,GO:0008074,GO:0008150,GO:0008152,GO:0009058,GO:0009117,GO:0009150,GO:0009152,GO:0009165,GO:0009187,GO:0009190,GO:0009259,GO:0009260,GO:0009975,GO:0009987,GO:0016020,GO:…	4.6.1.2	ko:K12323,ko:K12324	ANF_receptor,Ank_2,Guanylate_cyc,HNOBA,Pkinase,Pkinase_Tyr
g1013.t1	T	phosphorus-oxygen lyase activity. It is involved in the biological process described with	NPR2	GO:0000003,GO:0000166,GO:0001501,GO:0001558,GO:0001653,GO:0001882,GO:0001883,GO:0003008,GO:0003013,GO:0003014,GO:0003018,GO:0003674,GO:0003824,GO:0004383,GO:0004888,GO:0004930,GO:0005488,GO:0005515,GO:0005524,GO:0005525,GO:0005575,GO:0005622,GO:0005623,GO:0005737,GO:0005829,GO:0005886,GO:0005887,GO:0006139,GO:0006163,GO:0006164,GO:0006182,GO:0006584,GO:0006725,GO:0006753,GO:0006793,GO:0006796,GO:…	4.6.1.2	ko:K12323,ko:K12324	ANF_receptor,Dimer_Tnp_hAT,Guanylate_cyc,HNOBA,Pkinase,Pkinase_Tyr
g1071.t1	P	Type I phosphodiesterase / nucleotide pyrophosphatase	-	-	-	-	7TM_GPCR_Srx,C2,Sulfatase,Sulfatase_C
g1200.t1	T	protein serine/threonine kinase activity	MYLK3	GO:0001894,GO:0002009,GO:0002165,GO:0002526,GO:0002528,GO:0003002,GO:0003007,GO:0003008,GO:0003013,GO:0003018,GO:0003674,GO:0003824,GO:0004672,GO:0004674,GO:0004683,GO:0004687,GO:0005575,GO:0005622,GO:0005623,GO:0005737,GO:0005829,GO:0006464,GO:0006468,GO:0006793,GO:0006796,GO:0006807,GO:0006914,GO:0006950,GO:0006952,GO:0006954,GO:0006996,GO:0007010,GO:0007154,GO:0007165,GO:0007275,GO:0007386,GO:…	2.7.11.1,2.7.11.18	ko:K00907,ko:K08803,ko:K12567,ko:K17530	EF-hand_5,I-set,IQ,Ig_3,Pkinase,RhoGEF,Vps35,fn3
g1204.t1	E	Metal-dependent amidase aminoacylase carboxypeptidase	PM20D2	GO:0003674,GO:0003824,GO:0005575,GO:0005622,GO:0005623,GO:0005634,GO:0005654,GO:0006508,GO:0006807,GO:0008150,GO:0008152,GO:0008233,GO:0008238,GO:0016787,GO:0016805,GO:0019222,GO:0019538,GO:0031323,GO:0031974,GO:0031981,GO:0032268,GO:0043170,GO:0043226,GO:0043227,GO:0043229,GO:0043231,GO:0043233,GO:0044238,GO:0044422,GO:0044424,GO:0044428,GO:0044446,GO:0044464,GO:0050789,GO:0050794,GO:0051171,GO:…	-	-	FA_hydroxylase,M20_dimer,Peptidase_M20
g1204.t2	S	peptidase M20	PM20D2	GO:0003674,GO:0003824,GO:0005575,GO:0005622,GO:0005623,GO:0005634,GO:0005654,GO:0006508,GO:0006807,GO:0008150,GO:0008152,GO:0008233,GO:0008238,GO:0016787,GO:0016805,GO:0019222,GO:0019538,GO:0031323,GO:0031974,GO:0031981,GO:0032268,GO:0043170,GO:0043226,GO:0043227,GO:0043229,GO:0043231,GO:0043233,GO:0044238,GO:0044422,GO:0044424,GO:0044428,GO:0044446,GO:0044464,GO:0050789,GO:0050794,GO:0051171,GO:…	-	-	Acyl_transf_3,FA_hydroxylase,M20_dimer,Peptidase_M20
g1205.t1	O	protein autoubiquitination	RNF13	GO:0000139,GO:0000209,GO:0000306,GO:0000322,GO:0000323,GO:0000325,GO:0000326,GO:0003674,GO:0003824,GO:0004842,GO:0005488,GO:0005515,GO:0005575,GO:0005622,GO:0005623,GO:0005634,GO:0005635,GO:0005637,GO:0005654,GO:0005737,GO:0005764,GO:0005765,GO:0005768,GO:0005770,GO:0005773,GO:0005774,GO:0005783,GO:0005789,GO:0005794,GO:0005829,GO:0006464,GO:0006508,GO:0006511,GO:0006807,GO:0006810,GO:0006886,GO:…	2.3.2.27	ko:K15692,ko:K15706,ko:K15715	IQ,PA,RVT_1,Rhodanese,zf-RING_11,zf-RING_2
g1206.t1	I	fatty acid elongation, polyunsaturated fatty acid	ELOVL5	GO:0000038,GO:0001676,GO:0003674,GO:0003824,GO:0004312,GO:0005575,GO:0005622,GO:0005623,GO:0005737,GO:0005783,GO:0005789,GO:0006082,GO:0006139,GO:0006163,GO:0006164,GO:0006629,GO:0006631,GO:0006633,GO:0006637,GO:0006643,GO:0006665,GO:0006725,GO:0006732,GO:0006753,GO:0006790,GO:0006793,GO:0006796,GO:0006807,GO:0008150,GO:0008152,GO:0008610,GO:0009058,GO:0009108,GO:0009117,GO:0009150,GO:0009152,GO:…	2.3.1.199	ko:K10205,ko:K10244,ko:K10249	ELO
g1210.t1	S	Glycine N-acyltransferase-like protein	GLYATL3	GO:0006325,GO:0006464,GO:0006473,GO:0006475,GO:0006807,GO:0006996,GO:0008150,GO:0008152,GO:0009987,GO:0016043,GO:0016569,GO:0016570,GO:0016573,GO:0018193,GO:0018205,GO:0018393,GO:0018394,GO:0019538,GO:0036211,GO:0043170,GO:0043412,GO:0043543,GO:0044237,GO:0044238,GO:0044260,GO:0044267,GO:0051276,GO:0071704,GO:0071840,GO:1901564	-	-	FR47,Gly_acyl_tr_C,Gly_acyl_tr_N
g1210.t2	S	Glycine N-acyltransferase-like protein	GLYATL3	GO:0006325,GO:0006464,GO:0006473,GO:0006475,GO:0006807,GO:0006996,GO:0008150,GO:0008152,GO:0009987,GO:0016043,GO:0016569,GO:0016570,GO:0016573,GO:0018193,GO:0018205,GO:0018393,GO:0018394,GO:0019538,GO:0036211,GO:0043170,GO:0043412,GO:0043543,GO:0044237,GO:0044238,GO:0044260,GO:0044267,GO:0051276,GO:0071704,GO:0071840,GO:1901564	-	-	FR47,Gly_acyl_tr_C,Gly_acyl_tr_N
g1217.t1	T	It is involved in the biological process described with	-	GO:0003674,GO:0003824,GO:0004383,GO:0005575,GO:0005622,GO:0005623,GO:0005737,GO:0005829,GO:0005886,GO:0005887,GO:0006139,GO:0006163,GO:0006164,GO:0006182,GO:0006725,GO:0006753,GO:0006793,GO:0006796,GO:0006807,GO:0007154,GO:0007165,GO:0008074,GO:0008150,GO:0008152,GO:0009058,GO:0009117,GO:0009150,GO:0009152,GO:0009165,GO:0009187,GO:0009190,GO:0009259,GO:0009260,GO:0009975,GO:0009987,GO:0016020,GO:…	4.6.1.2	ko:K12323,ko:K12324	ANF_receptor,Ank_2,Guanylate_cyc,HNOBA,Pkinase,Pkinase_Tyr
g1250.t1	T	Adenylyl- / guanylyl cyclase, catalytic domain	-	-	4.6.1.2	ko:K12323,ko:K12324	ANF_receptor,Guanylate_cyc,Pkinase_Tyr
g1251.t1	T	Low-density lipoprotein receptor repeat class B	LRP10	GO:0003674,GO:0005041,GO:0005488,GO:0005575,GO:0005623,GO:0005886,GO:0006629,GO:0006810,GO:0006869,GO:0006897,GO:0006898,GO:0007275,GO:0007423,GO:0008150,GO:0008152,GO:0010876,GO:0016020,GO:0016021,GO:0016192,GO:0030228,GO:0031224,GO:0032368,GO:0032370,GO:0032501,GO:0032502,GO:0032879,GO:0033036,GO:0038024,GO:0043583,GO:0044238,GO:0044425,GO:0044464,GO:0044877,GO:0048513,GO:0048518,GO:0048731,GO:…	-	ko:K20049,ko:K20050,ko:K20051,ko:K20053	CUB,EGF_CA,FXa_inhibition,Ig_2,Ig_3,Ldl_recept_a,Ldl_recept_b,cEGF
g1266.t1	T	Serine/Threonine protein kinases, catalytic domain	-	-	-	-	Pkinase
g1267.t1	T	Protein tyrosine kinase	-	-	2.7.11.1,2.7.11.25	ko:K04420,ko:K08269,ko:K08857,ko:K13412	EF-hand_1,EF-hand_5,EF-hand_7,Pkinase
g1324.t1	Z	Dynein light chain	-	GO:0003674,GO:0005488,GO:0005515,GO:0005575,GO:0005622,GO:0005623,GO:0005737,GO:0005856,GO:0005868,GO:0005875,GO:0006810,GO:0006928,GO:0006996,GO:0007017,GO:0007018,GO:0008092,GO:0008150,GO:0009987,GO:0010970,GO:0015630,GO:0016043,GO:0022607,GO:0030030,GO:0030031,GO:0030286,GO:0030705,GO:0032781,GO:0032991,GO:0043085,GO:0043226,GO:0043228,GO:0043229,GO:0043232,GO:0043462,GO:0044085,GO:0044093,GO:…	-	ko:K10418	Dynein_light
g1325.t1	O	G-protein coupled receptor activity	-	-	-	-	7tm_1
g1373.t1	T	guanylate cyclase activity	-	GO:0003674,GO:0003824,GO:0004383,GO:0005575,GO:0005622,GO:0005623,GO:0005737,GO:0005829,GO:0005886,GO:0005887,GO:0006139,GO:0006163,GO:0006164,GO:0006182,GO:0006725,GO:0006753,GO:0006793,GO:0006796,GO:0006807,GO:0007154,GO:0007165,GO:0008074,GO:0008150,GO:0008152,GO:0009058,GO:0009117,GO:0009150,GO:0009152,GO:0009165,GO:0009187,GO:0009190,GO:0009259,GO:0009260,GO:0009975,GO:0009987,GO:0016020,GO:…	4.6.1.2	ko:K12323,ko:K12324,ko:K12325	ANF_receptor,Ank_2,Guanylate_cyc,HNOBA,Pkinase,Pkinase_Tyr
g1373.t2	T	guanylate cyclase activity	-	GO:0003674,GO:0003824,GO:0004383,GO:0005575,GO:0005622,GO:0005623,GO:0005737,GO:0005829,GO:0005886,GO:0005887,GO:0006139,GO:0006163,GO:0006164,GO:0006182,GO:0006725,GO:0006753,GO:0006793,GO:0006796,GO:0006807,GO:0007154,GO:0007165,GO:0008074,GO:0008150,GO:0008152,GO:0009058,GO:0009117,GO:0009150,GO:0009152,GO:0009165,GO:0009187,GO:0009190,GO:0009259,GO:0009260,GO:0009975,GO:0009987,GO:0016020,GO:…	4.6.1.2	ko:K12323,ko:K12324,ko:K12325	ANF_receptor,Ank_2,Guanylate_cyc,HNOBA,Pkinase,Pkinase_Tyr
g1374.t1	O	Belongs to the peptidase C1 family	-	-	3.4.22.1,3.4.22.15,3.4.22.27,3.4.22.38	ko:K01363,ko:K01365,ko:K01368,ko:K01371	Inhibitor_I29,Peptidase_C1,Propeptide_C1
g1374.t2	O	Belongs to the peptidase C1 family	CTSB	GO:0000003,GO:0000323,GO:0001775,GO:0001890,GO:0001893,GO:0002252,GO:0002263,GO:0002274,GO:0002275,GO:0002283,GO:0002366,GO:0002376,GO:0002443,GO:0002444,GO:0002446,GO:0003006,GO:0003674,GO:0003824,GO:0004175,GO:0004197,GO:0004252,GO:0005488,GO:0005515,GO:0005518,GO:0005575,GO:0005576,GO:0005615,GO:0005622,GO:0005623,GO:0005634,GO:0005730,GO:0005737,GO:0005739,GO:0005764,GO:0005768,GO:0005773,GO:…	3.4.22.1,3.4.22.15,3.4.22.38	ko:K01363,ko:K01365,ko:K01371	Glyco_hydro_18,Inhibitor_I29,Peptidase_C1,Propeptide_C1
g1461.t1	T	Glutamate receptor, ionotropic	GRID2	GO:0001964,GO:0003008,GO:0003674,GO:0004888,GO:0005488,GO:0005515,GO:0005575,GO:0005623,GO:0005886,GO:0005887,GO:0007154,GO:0007155,GO:0007157,GO:0007165,GO:0007166,GO:0007215,GO:0007267,GO:0007268,GO:0007275,GO:0007399,GO:0007416,GO:0007417,GO:0007420,GO:0008066,GO:0008104,GO:0008150,GO:0008328,GO:0009605,GO:0009653,GO:0009987,GO:0010646,GO:0010941,GO:0010975,GO:0014069,GO:0016020,GO:0016021,GO:…	-	ko:K05206,ko:K05207	ANF_receptor,Lig_chan,Lig_chan-Glu_bd,RVT_1,SBP_bac_3
g1463.t1	T	Adenylyl- / guanylyl cyclase, catalytic domain	-	-	4.6.1.2	ko:K12323,ko:K12324	ANF_receptor,Guanylate_cyc,Pkinase_Tyr
g1464.t1	T	C-src tyrosine kinase	CSK	GO:0000003,GO:0000166,GO:0001817,GO:0001818,GO:0001894,GO:0001932,GO:0001933,GO:0001934,GO:0002119,GO:0002164,GO:0002253,GO:0002376,GO:0002429,GO:0002682,GO:0002684,GO:0002694,GO:0002696,GO:0002757,GO:0002764,GO:0002768,GO:0003006,GO:0003674,GO:0003824,GO:0004672,GO:0004713,GO:0004715,GO:0005102,GO:0005488,GO:0005515,GO:0005524,GO:0005575,GO:0005622,GO:0005623,GO:0005737,GO:0005829,GO:0005886,GO:…	2.7.10.2	ko:K05728,ko:K08888	7tm_1,Myotub-related,Pkinase_Tyr,SH2,SH3_1
g1509.t1	T	nephronectin	NPNT	GO:0001655,GO:0001657,GO:0001658,GO:0001763,GO:0001822,GO:0001823,GO:0001932,GO:0001934,GO:0002009,GO:0003674,GO:0005102,GO:0005178,GO:0005488,GO:0005515,GO:0005575,GO:0005576,GO:0005604,GO:0005622,GO:0005623,GO:0005737,GO:0006355,GO:0006357,GO:0006937,GO:0006940,GO:0007155,GO:0007160,GO:0007275,GO:0008104,GO:0008150,GO:0009605,GO:0009653,GO:0009887,GO:0009888,GO:0009889,GO:0009891,GO:0009893,GO:…	-	ko:K02599,ko:K06824	EGF,EGF_CA,MAM,Notch,ShK,UPF0560,cEGF
g1510.t1	S	Chitin binding Peritrophin-A domain	-	-	-	-	CBM_14,Chitin_bind_4
g1542.t1	O	It is involved in the biological process described with proteolysis	mep1b	-	3.4.24.63	ko:K08606	Arf,Astacin,DUF1891,MAM
g1601.t1	T	It is involved in the biological process described with	-	GO:0003674,GO:0003824,GO:0004383,GO:0005575,GO:0005622,GO:0005623,GO:0005737,GO:0005829,GO:0005886,GO:0005887,GO:0006139,GO:0006163,GO:0006164,GO:0006182,GO:0006725,GO:0006753,GO:0006793,GO:0006796,GO:0006807,GO:0007154,GO:0007165,GO:0008074,GO:0008150,GO:0008152,GO:0009058,GO:0009117,GO:0009150,GO:0009152,GO:0009165,GO:0009187,GO:0009190,GO:0009259,GO:0009260,GO:0009975,GO:0009987,GO:0016020,GO:…	4.6.1.2	ko:K12323,ko:K12324	ANF_receptor,Ank_2,Guanylate_cyc,HNOBA,Pkinase,Pkinase_Tyr
g1603.t1	T	ATP binding. It is involved in the biological process described with protein phosphorylation	KDR	GO:0000003,GO:0000165,GO:0000166,GO:0000186,GO:0000902,GO:0000904,GO:0001101,GO:0001525,GO:0001541,GO:0001558,GO:0001568,GO:0001569,GO:0001570,GO:0001654,GO:0001655,GO:0001666,GO:0001667,GO:0001763,GO:0001817,GO:0001818,GO:0001819,GO:0001889,GO:0001894,GO:0001932,GO:0001934,GO:0001936,GO:0001937,GO:0001938,GO:0001944,GO:0001945,GO:0001946,GO:0001952,GO:0001954,GO:0002009,GO:0002040,GO:0002042,GO:…	2.7.10.1,3.4.21.109	ko:K04362,ko:K05089,ko:K05093,ko:K05096,ko:K05097,ko:K05098,ko:K08252,ko:K08670	CUB,I-set,Ig_2,Ig_3,Ldl_recept_a,Pkinase_Tyr,Trypsin,V-set,ZZ,ig
g1604.t1	T	tyrosine-protein kinase	CSK	GO:0000003,GO:0000166,GO:0001817,GO:0001818,GO:0001894,GO:0001932,GO:0001933,GO:0001934,GO:0002119,GO:0002164,GO:0002253,GO:0002376,GO:0002429,GO:0002682,GO:0002684,GO:0002694,GO:0002696,GO:0002757,GO:0002764,GO:0002768,GO:0003006,GO:0003674,GO:0003824,GO:0004672,GO:0004713,GO:0004715,GO:0005102,GO:0005488,GO:0005515,GO:0005524,GO:0005575,GO:0005622,GO:0005623,GO:0005737,GO:0005829,GO:0005886,GO:…	2.7.10.2	ko:K05728,ko:K08888	7tm_1,Myotub-related,Pkinase_Tyr,SH2,SH3_1
g1717.t1	S	Cysteine-rich secretory protein	CRISP3	GO:0001775,GO:0002252,GO:0002263,GO:0002274,GO:0002275,GO:0002283,GO:0002366,GO:0002376,GO:0002443,GO:0002444,GO:0002446,GO:0005575,GO:0005576,GO:0005622,GO:0005623,GO:0005737,GO:0006810,GO:0006887,GO:0006935,GO:0006950,GO:0006952,GO:0006955,GO:0008150,GO:0009605,GO:0009987,GO:0012505,GO:0016192,GO:0030133,GO:0030141,GO:0031012,GO:0031410,GO:0031974,GO:0031982,GO:0031983,GO:0032940,GO:0034774,GO:…	-	ko:K19919	CAP,CXCXC,Crisp,EGF,Lectin_C
g1760.t1	OT	Calpain 2, (m II) large subunit	CAPN2	GO:0000003,GO:0000323,GO:0000768,GO:0000785,GO:0001101,GO:0001666,GO:0001667,GO:0001701,GO:0001824,GO:0002064,GO:0002065,GO:0002066,GO:0003002,GO:0003006,GO:0003674,GO:0003824,GO:0004175,GO:0004197,GO:0004198,GO:0005488,GO:0005509,GO:0005515,GO:0005575,GO:0005622,GO:0005623,GO:0005634,GO:0005694,GO:0005737,GO:0005764,GO:0005773,GO:0005783,GO:0005794,GO:0005829,GO:0005856,GO:0005886,GO:0005938,GO:…	3.4.22.52,3.4.22.53,3.4.22.54	ko:K01367,ko:K03853,ko:K08573,ko:K08578,ko:K08585	Calpain_III,Calpain_u2,EF-hand_1,EF-hand_5,EF-hand_6,EF-hand_8,Peptidase_C2,ZZ
g1761.t1	S	galactosylceramide sulfotransferase activity	GAL3ST1	GO:0000003,GO:0000139,GO:0001733,GO:0003674,GO:0003824,GO:0005575,GO:0005622,GO:0005623,GO:0005737,GO:0005794,GO:0005886,GO:0005887,GO:0006464,GO:0006486,GO:0006487,GO:0006629,GO:0006643,GO:0006664,GO:0006665,GO:0006672,GO:0006677,GO:0006681,GO:0006682,GO:0006687,GO:0006688,GO:0006807,GO:0007272,GO:0007275,GO:0007276,GO:0007283,GO:0007399,GO:0008146,GO:0008150,GO:0008152,GO:0008366,GO:0008610,GO:…	2.8.2.11	ko:K01019,ko:K09675,ko:K09676	Gal-3-0_sulfotr
g1763.t1	-	-	-	-	-	-	-
g1771.t1	T	Natriuretic peptide receptor	NPR1	GO:0000166,GO:0001558,GO:0001653,GO:0001882,GO:0001883,GO:0003008,GO:0003013,GO:0003014,GO:0003018,GO:0003674,GO:0003824,GO:0004383,GO:0004888,GO:0004930,GO:0005488,GO:0005515,GO:0005525,GO:0005575,GO:0005622,GO:0005623,GO:0005737,GO:0005829,GO:0005886,GO:0005887,GO:0006139,GO:0006163,GO:0006164,GO:0006182,GO:0006584,GO:0006725,GO:0006753,GO:0006793,GO:0006796,GO:0006807,GO:0006810,GO:0006935,GO:…	4.6.1.2	ko:K12323,ko:K12324,ko:K12325,ko:K13140	ANF_receptor,Dimer_Tnp_hAT,Guanylate_cyc,HNOBA,Ints3,Pkinase,Pkinase_Tyr
g1844.t1	S	Otopetrin	-	GO:0003674,GO:0005215,GO:0005216,GO:0005261,GO:0006810,GO:0006811,GO:0006812,GO:0008150,GO:0008324,GO:0015075,GO:0015077,GO:0015078,GO:0015252,GO:0015267,GO:0015318,GO:0015672,GO:0022803,GO:0022838,GO:0022857,GO:0022890,GO:0034220,GO:0051179,GO:0051234,GO:0055085,GO:0098655,GO:0098660,GO:0098662,GO:1902600	-	-	Otopetrin
g1897.t1	T	guanylate cyclase activity	Gucy2g	GO:0003674,GO:0003824,GO:0004383,GO:0005575,GO:0005622,GO:0005623,GO:0005737,GO:0005829,GO:0005886,GO:0006139,GO:0006163,GO:0006164,GO:0006182,GO:0006725,GO:0006753,GO:0006793,GO:0006796,GO:0006807,GO:0007154,GO:0007165,GO:0008074,GO:0008150,GO:0008152,GO:0009058,GO:0009117,GO:0009150,GO:0009152,GO:0009165,GO:0009187,GO:0009190,GO:0009259,GO:0009260,GO:0009897,GO:0009975,GO:0009986,GO:0009987,GO:…	4.6.1.2	ko:K12322,ko:K12323	ANF_receptor,Guanylate_cyc,HNOBA,Pkinase_Tyr
g1898.t1	T	Adenylyl- / guanylyl cyclase, catalytic domain	-	GO:0003674,GO:0003824,GO:0004383,GO:0005575,GO:0005622,GO:0005623,GO:0005737,GO:0005829,GO:0005886,GO:0005887,GO:0006139,GO:0006163,GO:0006164,GO:0006182,GO:0006725,GO:0006753,GO:0006793,GO:0006796,GO:0006807,GO:0007154,GO:0007165,GO:0008074,GO:0008150,GO:0008152,GO:0009058,GO:0009117,GO:0009150,GO:0009152,GO:0009165,GO:0009187,GO:0009190,GO:0009259,GO:0009260,GO:0009975,GO:0009987,GO:0016020,GO:…	4.6.1.2	ko:K12323,ko:K12324	ANF_receptor,Ank_2,Guanylate_cyc,HNOBA,Pkinase,Pkinase_Tyr
g1940.t1	T	Neural ectodermal development factor	ImpL2	GO:0003674,GO:0005488,GO:0005515,GO:0005520,GO:0005575,GO:0005576,GO:0005615,GO:0006950,GO:0007275,GO:0007399,GO:0007568,GO:0008150,GO:0008340,GO:0009605,GO:0009966,GO:0009967,GO:0009968,GO:0009987,GO:0009991,GO:0010259,GO:0010646,GO:0010647,GO:0010648,GO:0010883,GO:0010888,GO:0014066,GO:0014067,GO:0017046,GO:0019838,GO:0022008,GO:0022611,GO:0023051,GO:0023056,GO:0023057,GO:0030154,GO:0030182,GO:…	-	-	C2-set_2,I-set,Ig_3,V-set,ig
g1942.t1	U	vesicle fusion with Golgi apparatus	SEC22B	GO:0000139,GO:0000149,GO:0002376,GO:0002474,GO:0002478,GO:0002479,GO:0002790,GO:0003674,GO:0005484,GO:0005488,GO:0005515,GO:0005575,GO:0005622,GO:0005623,GO:0005737,GO:0005783,GO:0005789,GO:0005793,GO:0005794,GO:0005798,GO:0005886,GO:0006810,GO:0006886,GO:0006887,GO:0006888,GO:0006890,GO:0006900,GO:0006901,GO:0006903,GO:0006906,GO:0006996,GO:0007154,GO:0007267,GO:0008104,GO:0008150,GO:0009306,GO:…	-	ko:K08517	Acyltransferase,Complex1_51K,DLIC,DcpS,DcpS_C,Elong_Iki1,Elongin_A,Glyco_hydro_1,HSP70,Longin,PI3_PI4_kinase,PP2C,PPR,PPR_2,PPR_3,Synaptobrevin,ubiquitin
g1957.t1	T	Adenylyl- / guanylyl cyclase, catalytic domain	-	-	4.6.1.2	ko:K12323,ko:K12324	ANF_receptor,Guanylate_cyc,Pkinase_Tyr
g1958.t1	I	Lipocalin / cytosolic fatty-acid binding protein family	FABP3	GO:0000003,GO:0000323,GO:0001101,GO:0001654,GO:0001669,GO:0001675,GO:0001775,GO:0001816,GO:0001932,GO:0001933,GO:0001964,GO:0001972,GO:0002252,GO:0002263,GO:0002274,GO:0002275,GO:0002283,GO:0002366,GO:0002376,GO:0002443,GO:0002444,GO:0002446,GO:0003006,GO:0003008,GO:0003407,GO:0003674,GO:0005102,GO:0005215,GO:0005319,GO:0005324,GO:0005488,GO:0005496,GO:0005501,GO:0005504,GO:0005515,GO:0005575,GO:…	-	ko:K08752,ko:K08753,ko:K08754,ko:K08756,ko:K17289	Lipocalin,Lipocalin_7
g1959.t1	I	Lipocalin / cytosolic fatty-acid binding protein family	FABP3	GO:0000003,GO:0000323,GO:0001101,GO:0001654,GO:0001669,GO:0001675,GO:0001775,GO:0001816,GO:0001932,GO:0001933,GO:0001964,GO:0001972,GO:0002252,GO:0002263,GO:0002274,GO:0002275,GO:0002283,GO:0002366,GO:0002376,GO:0002443,GO:0002444,GO:0002446,GO:0003006,GO:0003008,GO:0003407,GO:0003674,GO:0005102,GO:0005215,GO:0005319,GO:0005324,GO:0005488,GO:0005496,GO:0005501,GO:0005504,GO:0005515,GO:0005575,GO:…	-	ko:K08752,ko:K08753,ko:K08754,ko:K08756,ko:K17289	Lipocalin,Lipocalin_7
g1960.t1	K	DNA binding. It is involved in the biological process described with regulation of transcription, DNA-templated	RFX3	GO:0000003,GO:0000122,GO:0000228,GO:0000785,GO:0000790,GO:0000902,GO:0000904,GO:0000976,GO:0000977,GO:0000978,GO:0000981,GO:0000982,GO:0000987,GO:0001012,GO:0001067,GO:0001077,GO:0001228,GO:0001539,GO:0001675,GO:0001838,GO:0001841,GO:0001843,GO:0002009,GO:0002064,GO:0002065,GO:0002066,GO:0002067,GO:0002068,GO:0002069,GO:0002070,GO:0002071,GO:0002376,GO:0002791,GO:0003006,GO:0003008,GO:0003309,GO:…	-	ko:K09173,ko:K09174,ko:K09175	DnaJ_C,LRR_8,MFS_1,RFX1_trans_act,RFX_DNA_binding,zf-C2H2
g1991.t1	O	Ubiquitin-2 like Rad60 SUMO-like	NFATC2IP	GO:0000724,GO:0000725,GO:0001816,GO:0003674,GO:0005575,GO:0005622,GO:0005623,GO:0005634,GO:0005737,GO:0006139,GO:0006259,GO:0006281,GO:0006302,GO:0006310,GO:0006355,GO:0006357,GO:0006464,GO:0006725,GO:0006807,GO:0006950,GO:0006974,GO:0008150,GO:0008152,GO:0009889,GO:0009891,GO:0009893,GO:0009987,GO:0010468,GO:0010556,GO:0010557,GO:0010604,GO:0010628,GO:0016925,GO:0018193,GO:0018205,GO:0019219,GO:…	-	ko:K12160	GRDP-like,Methyltransf_21,Rad60-SLD,ubiquitin
g1992.t1	S	GTP binding. It is involved in the biological process described with	-	-	-	ko:K04353,ko:K07208,ko:K07827,ko:K07830,ko:K07831,ko:K07839,ko:K07841,ko:K07843,ko:K07847,ko:K17198	Ras
g1993.t1	T	protein serine threonine kinase activity. It is involved in the biological process described with protein phosphorylation	RIOK2	GO:0000462,GO:0002119,GO:0002164,GO:0003674,GO:0003824,GO:0004672,GO:0004674,GO:0005575,GO:0005622,GO:0005623,GO:0005634,GO:0005654,GO:0005737,GO:0005829,GO:0006139,GO:0006364,GO:0006396,GO:0006464,GO:0006468,GO:0006725,GO:0006793,GO:0006796,GO:0006807,GO:0007088,GO:0007275,GO:0007346,GO:0007399,GO:0008150,GO:0008152,GO:0008284,GO:0009791,GO:0009893,GO:0009987,GO:0010467,GO:0010468,GO:0010494,GO:…	2.7.11.1	ko:K07179	DDE_3,Pkinase,RIO1,Ribosomal_L23,Rio2_N,SMN
g2024.t1	T	guanylate cyclase activity	-	GO:0003674,GO:0003824,GO:0004383,GO:0005575,GO:0005622,GO:0005623,GO:0005737,GO:0005829,GO:0005886,GO:0005887,GO:0006139,GO:0006163,GO:0006164,GO:0006182,GO:0006725,GO:0006753,GO:0006793,GO:0006796,GO:0006807,GO:0007154,GO:0007165,GO:0008074,GO:0008150,GO:0008152,GO:0009058,GO:0009117,GO:0009150,GO:0009152,GO:0009165,GO:0009187,GO:0009190,GO:0009259,GO:0009260,GO:0009975,GO:0009987,GO:0016020,GO:…	4.6.1.2	ko:K12323,ko:K12324,ko:K12325	ANF_receptor,Ank_2,Guanylate_cyc,HNOBA,Pkinase,Pkinase_Tyr
g2055.t1	T	It is involved in the biological process described with	-	GO:0003674,GO:0003824,GO:0004383,GO:0005575,GO:0005622,GO:0005623,GO:0005737,GO:0005829,GO:0005886,GO:0005887,GO:0006139,GO:0006163,GO:0006164,GO:0006182,GO:0006725,GO:0006753,GO:0006793,GO:0006796,GO:0006807,GO:0007154,GO:0007165,GO:0008074,GO:0008150,GO:0008152,GO:0009058,GO:0009117,GO:0009150,GO:0009152,GO:0009165,GO:0009187,GO:0009190,GO:0009259,GO:0009260,GO:0009975,GO:0009987,GO:0016020,GO:…	4.6.1.2	ko:K12323,ko:K12324	ANF_receptor,Ank_2,Guanylate_cyc,HNOBA,Pkinase,Pkinase_Tyr
g2276.t1	T	Tyrosine kinase, catalytic domain	-	GO:0000003,GO:0000165,GO:0000902,GO:0001700,GO:0002009,GO:0002064,GO:0002065,GO:0002066,GO:0002376,GO:0003006,GO:0003674,GO:0003824,GO:0004672,GO:0004713,GO:0004715,GO:0005102,GO:0005488,GO:0005515,GO:0005575,GO:0005622,GO:0005623,GO:0005737,GO:0005886,GO:0005938,GO:0006464,GO:0006468,GO:0006793,GO:0006796,GO:0006807,GO:0006810,GO:0006897,GO:0006909,GO:0006928,GO:0006950,GO:0006952,GO:0006955,GO:…	2.7.10.2	ko:K17512	Ank,Ank_2,Ank_3,Ank_4,Ank_5,Pkinase_Tyr,SH2,SH3_1,SH3_9
g2276.t2	T	Tyrosine kinase, catalytic domain	-	GO:0000003,GO:0000165,GO:0000902,GO:0001700,GO:0002009,GO:0002064,GO:0002065,GO:0002066,GO:0002376,GO:0003006,GO:0003674,GO:0003824,GO:0004672,GO:0004713,GO:0004715,GO:0005102,GO:0005488,GO:0005515,GO:0005575,GO:0005622,GO:0005623,GO:0005737,GO:0005886,GO:0005938,GO:0006464,GO:0006468,GO:0006793,GO:0006796,GO:0006807,GO:0006810,GO:0006897,GO:0006909,GO:0006928,GO:0006950,GO:0006952,GO:0006955,GO:…	2.7.10.2	ko:K17512	Ank,Ank_2,Ank_3,Ank_4,Ank_5,Pkinase_Tyr,SH2,SH3_1,SH3_9
g2316.t1	T	Fibroblast growth factor receptor	FGFR4	GO:0000003,GO:0000122,GO:0000165,GO:0000187,GO:0000323,GO:0000902,GO:0000904,GO:0001501,GO:0001503,GO:0001525,GO:0001558,GO:0001568,GO:0001570,GO:0001654,GO:0001655,GO:0001657,GO:0001667,GO:0001701,GO:0001708,GO:0001759,GO:0001763,GO:0001764,GO:0001816,GO:0001817,GO:0001818,GO:0001822,GO:0001823,GO:0001837,GO:0001889,GO:0001890,GO:0001892,GO:0001932,GO:0001934,GO:0001936,GO:0001938,GO:0001942,GO:…	2.7.10.1	ko:K04362,ko:K05093,ko:K05094,ko:K05095	AAA,I-set,Ig_2,Ig_3,PEX-1N,Pkinase_Tyr,ig
g2329.t1	T	Protein tyrosine kinase	-	-	2.7.11.1,2.7.11.25	ko:K04420,ko:K08269,ko:K08857,ko:K13412	EF-hand_1,EF-hand_5,EF-hand_7,Pkinase
g2400.t1	T	Adenylyl- / guanylyl cyclase, catalytic domain	-	-	4.6.1.2	ko:K12323,ko:K12324	ANF_receptor,Guanylate_cyc,Pkinase_Tyr
g2401.t1	T	Adenylyl- / guanylyl cyclase, catalytic domain	-	GO:0003674,GO:0003824,GO:0004383,GO:0005575,GO:0005622,GO:0005623,GO:0005737,GO:0005829,GO:0005886,GO:0005887,GO:0006139,GO:0006163,GO:0006164,GO:0006182,GO:0006725,GO:0006753,GO:0006793,GO:0006796,GO:0006807,GO:0007154,GO:0007165,GO:0008074,GO:0008150,GO:0008152,GO:0009058,GO:0009117,GO:0009150,GO:0009152,GO:0009165,GO:0009187,GO:0009190,GO:0009259,GO:0009260,GO:0009975,GO:0009987,GO:0016020,GO:…	4.6.1.2	ko:K11450,ko:K12323,ko:K12324,ko:K14429	AA_permease,ANF_receptor,Amino_oxidase,Ank,Ank_2,Ank_4,Ank_5,Guanylate_cyc,HNOBA,Ion_trans,Pkinase,Pkinase_Tyr,RVT_1,SAM_1,SLC12,SWIRM,TMC,rve,zf-C3HC4_3
g2403.t1	T	It is involved in the biological process described with	-	GO:0003674,GO:0003824,GO:0004383,GO:0005575,GO:0005622,GO:0005623,GO:0005737,GO:0005829,GO:0005886,GO:0005887,GO:0006139,GO:0006163,GO:0006164,GO:0006182,GO:0006725,GO:0006753,GO:0006793,GO:0006796,GO:0006807,GO:0007154,GO:0007165,GO:0008074,GO:0008150,GO:0008152,GO:0009058,GO:0009117,GO:0009150,GO:0009152,GO:0009165,GO:0009187,GO:0009190,GO:0009259,GO:0009260,GO:0009975,GO:0009987,GO:0016020,GO:…	4.6.1.2	ko:K12323,ko:K12324	ANF_receptor,Ank_2,Guanylate_cyc,HNOBA,Pkinase,Pkinase_Tyr
g2431.t1	T	It is involved in the biological process described with	-	GO:0003674,GO:0003824,GO:0004383,GO:0005575,GO:0005622,GO:0005623,GO:0005737,GO:0005829,GO:0005886,GO:0005887,GO:0006139,GO:0006163,GO:0006164,GO:0006182,GO:0006725,GO:0006753,GO:0006793,GO:0006796,GO:0006807,GO:0007154,GO:0007165,GO:0008074,GO:0008150,GO:0008152,GO:0009058,GO:0009117,GO:0009150,GO:0009152,GO:0009165,GO:0009187,GO:0009190,GO:0009259,GO:0009260,GO:0009975,GO:0009987,GO:0016020,GO:…	4.6.1.2	ko:K12323,ko:K12324	ANF_receptor,Ank_2,Guanylate_cyc,HNOBA,Pkinase,Pkinase_Tyr
g2462.t1	EGP	Allomyces macrogynus ATCC 38327	-	-	-	-	MFS_1,Sugar_tr
g2463.t1	EGP	Allomyces macrogynus ATCC 38327	-	-	-	-	MFS_1,Sugar_tr
g2492.t1	Z	cytoskeletal protein binding	-	-	-	-	CH,KASH
g2493.t1	T	protein kinase kinase kinase 4	MAP3K4	GO:0000003,GO:0000131,GO:0000160,GO:0000161,GO:0000165,GO:0000166,GO:0000186,GO:0001672,GO:0001708,GO:0001890,GO:0001932,GO:0001934,GO:0002251,GO:0002376,GO:0002385,GO:0003002,GO:0003006,GO:0003674,GO:0003779,GO:0003824,GO:0004672,GO:0004674,GO:0004690,GO:0004691,GO:0004709,GO:0004713,GO:0005488,GO:0005515,GO:0005524,GO:0005575,GO:0005622,GO:0005623,GO:0005737,GO:0005829,GO:0005933,GO:0005934,GO:…	2.7.11.25	ko:K04428,ko:K11230	CCDC142,CHCH,FNIP,MATH,PAS,Pkinase
g2497.t1	S	Interferon-inducible GTPase (IIGP)	Ifggb1	GO:0002376,GO:0003674,GO:0003824,GO:0003924,GO:0005575,GO:0005622,GO:0005623,GO:0005737,GO:0005783,GO:0005789,GO:0006950,GO:0006952,GO:0006955,GO:0008150,GO:0009605,GO:0009607,GO:0009615,GO:0009617,GO:0009987,GO:0010033,GO:0012505,GO:0016020,GO:0016462,GO:0016787,GO:0016817,GO:0016818,GO:0017111,GO:0031984,GO:0034097,GO:0034341,GO:0035455,GO:0035456,GO:0035458,GO:0042175,GO:0042221,GO:0043207,GO:…	-	-	IIGP
g2502.t1	T	Macrophage-stimulating protein receptor	MST1R	GO:0000003,GO:0001725,GO:0001932,GO:0001934,GO:0003674,GO:0003824,GO:0004672,GO:0004713,GO:0004714,GO:0004888,GO:0005011,GO:0005488,GO:0005515,GO:0005575,GO:0005622,GO:0005623,GO:0005737,GO:0005773,GO:0005856,GO:0005886,GO:0005887,GO:0006464,GO:0006468,GO:0006793,GO:0006796,GO:0006807,GO:0006935,GO:0006950,GO:0006952,GO:0007154,GO:0007165,GO:0007166,GO:0007167,GO:0007169,GO:0007338,GO:0008150,GO:…	2.7.10.1	ko:K05086,ko:K05088,ko:K05099,ko:K05100,ko:K05118,ko:K05119,ko:K08252	Actin,Furin-like,Gly_rich,Integrin_alpha2,Integrin_beta,MAM,PSI,Pkinase_Tyr,Recep_L_domain,Sema,TIG,fn3
g2503.t1	O	It is involved in the biological process described with proteolysis	mep1b	GO:0003008,GO:0003674,GO:0003824,GO:0004175,GO:0004222,GO:0005575,GO:0005576,GO:0005615,GO:0006508,GO:0006807,GO:0006928,GO:0007154,GO:0007267,GO:0007600,GO:0008150,GO:0008152,GO:0008233,GO:0008237,GO:0009987,GO:0010467,GO:0016477,GO:0016485,GO:0016787,GO:0019233,GO:0019538,GO:0023052,GO:0030154,GO:0032501,GO:0032502,GO:0040011,GO:0043170,GO:0044238,GO:0044421,GO:0045165,GO:0045168,GO:0046331,GO:…	3.4.24.63	ko:K08606	Astacin,DUF1891,MAM
g2504.t1	S	PAP2 superfamily C-terminal	SGMS1	GO:0000138,GO:0000139,GO:0002237,GO:0002950,GO:0003674,GO:0003824,GO:0005575,GO:0005622,GO:0005623,GO:0005634,GO:0005737,GO:0005783,GO:0005789,GO:0005794,GO:0005795,GO:0005886,GO:0005887,GO:0006629,GO:0006643,GO:0006644,GO:0006665,GO:0006672,GO:0006684,GO:0006686,GO:0006793,GO:0006796,GO:0006807,GO:0006950,GO:0006952,GO:0006954,GO:0008150,GO:0008152,GO:0008610,GO:0008654,GO:0009058,GO:0009605,GO:…	2.7.8.27	ko:K04714	PAP2_C,SAM_1
g2505.t1	T	It is involved in the biological process described with	-	GO:0003674,GO:0003824,GO:0004383,GO:0005575,GO:0005622,GO:0005623,GO:0005737,GO:0005829,GO:0005886,GO:0005887,GO:0006139,GO:0006163,GO:0006164,GO:0006182,GO:0006725,GO:0006753,GO:0006793,GO:0006796,GO:0006807,GO:0007154,GO:0007165,GO:0008074,GO:0008150,GO:0008152,GO:0009058,GO:0009117,GO:0009150,GO:0009152,GO:0009165,GO:0009187,GO:0009190,GO:0009259,GO:0009260,GO:0009975,GO:0009987,GO:0016020,GO:…	4.6.1.2	ko:K12323,ko:K12324	ANF_receptor,Ank_2,Guanylate_cyc,HNOBA,Pkinase,Pkinase_Tyr
g2606.t1	T	positive regulation of endothelial cell chemotaxis	MST1R	GO:0000003,GO:0000122,GO:0000165,GO:0000187,GO:0000902,GO:0000904,GO:0001678,GO:0001725,GO:0001763,GO:0001764,GO:0001817,GO:0001818,GO:0001885,GO:0001886,GO:0001889,GO:0001890,GO:0001932,GO:0001933,GO:0001934,GO:0002009,GO:0002064,GO:0003006,GO:0003008,GO:0003012,GO:0003013,GO:0003015,GO:0003158,GO:0003382,GO:0003674,GO:0003824,GO:0004672,GO:0004713,GO:0004714,GO:0004888,GO:0005008,GO:0005011,GO:…	2.7.10.1	ko:K05088,ko:K05099,ko:K05100,ko:K08252	Actin,F-actin_cap_A,Integrin_alpha2,Integrin_beta,PSI,Pkinase_Tyr,Sema,TIG
g2607.t1	T	guanylate cyclase activity	Gucy2g	GO:0003674,GO:0003824,GO:0004383,GO:0005575,GO:0005622,GO:0005623,GO:0005737,GO:0005829,GO:0005886,GO:0006139,GO:0006163,GO:0006164,GO:0006182,GO:0006725,GO:0006753,GO:0006793,GO:0006796,GO:0006807,GO:0007154,GO:0007165,GO:0008074,GO:0008150,GO:0008152,GO:0009058,GO:0009117,GO:0009150,GO:0009152,GO:0009165,GO:0009187,GO:0009190,GO:0009259,GO:0009260,GO:0009897,GO:0009975,GO:0009986,GO:0009987,GO:…	4.6.1.2	ko:K12321,ko:K12322,ko:K12323,ko:K12324	ANF_receptor,Guanylate_cyc,HNOBA,Pkinase,Pkinase_Tyr
g2637.t1	BDL	Structural maintenance of chromosomes protein	-	GO:0000819,GO:0005575,GO:0005911,GO:0006996,GO:0007049,GO:0007059,GO:0007062,GO:0008150,GO:0009506,GO:0009987,GO:0016043,GO:0022402,GO:0030054,GO:0051276,GO:0055044,GO:0071840,GO:0098813	-	-	AAA_15,AAA_23,RabGAP-TBC,SMC_N
g2735.t1	T	Rho Binding	ROCK2	GO:0000003,GO:0000022,GO:0000070,GO:0000226,GO:0000278,GO:0000280,GO:0000281,GO:0000819,GO:0000902,GO:0000904,GO:0000910,GO:0000922,GO:0001654,GO:0001700,GO:0001726,GO:0001736,GO:0001737,GO:0001738,GO:0001745,GO:0001775,GO:0001816,GO:0001817,GO:0001819,GO:0001838,GO:0001841,GO:0001843,GO:0001932,GO:0001934,GO:0001952,GO:0001954,GO:0002009,GO:0002064,GO:0002119,GO:0002164,GO:0002165,GO:0002252,GO:…	2.7.11.1	ko:K04514,ko:K16307,ko:K17388	C1_1,HR1,PH,Pkinase,Pkinase_C,Rho_Binding,WD40,rve
g2736.t1	T	Bravo-like intracellular region	CHL1	GO:0000003,GO:0000132,GO:0000226,GO:0000278,GO:0000902,GO:0000904,GO:0001101,GO:0001501,GO:0001508,GO:0001525,GO:0001558,GO:0001568,GO:0001667,GO:0001764,GO:0001775,GO:0001871,GO:0001932,GO:0001944,GO:0002009,GO:0002020,GO:0002064,GO:0002165,GO:0002175,GO:0002252,GO:0002263,GO:0002274,GO:0002275,GO:0002283,GO:0002366,GO:0002376,GO:0002443,GO:0002444,GO:0002446,GO:0003007,GO:0003008,GO:0003381,GO:…	-	ko:K06550,ko:K06756,ko:K06757,ko:K06758,ko:K06760	Bravo_FIGEY,DUF4821,Glyco_hydro_47,Homeobox,I-set,Ig_2,Ig_3,TRAP-delta,V-set,fn3,ig
g2738.t1	T	positive regulation of endothelial cell chemotaxis	MET	GO:0000003,GO:0000122,GO:0000165,GO:0000187,GO:0000902,GO:0000904,GO:0001678,GO:0001763,GO:0001764,GO:0001817,GO:0001818,GO:0001885,GO:0001886,GO:0001889,GO:0001890,GO:0001932,GO:0001933,GO:0001934,GO:0002009,GO:0002064,GO:0003006,GO:0003008,GO:0003012,GO:0003013,GO:0003015,GO:0003158,GO:0003382,GO:0003674,GO:0003824,GO:0004672,GO:0004713,GO:0004714,GO:0004888,GO:0005008,GO:0005085,GO:0005088,GO:…	2.7.10.1	ko:K05086,ko:K05088,ko:K05099,ko:K05100,ko:K05118,ko:K05119,ko:K08252	F-actin_cap_A,Furin-like,Gly_rich,Integrin_alpha2,Integrin_beta,MAM,PSI,Pkinase_Tyr,Recep_L_domain,Sema,TIG,fn3
g2774.t1	T	guanylate cyclase activity	-	GO:0003674,GO:0003824,GO:0004383,GO:0005575,GO:0005622,GO:0005623,GO:0005737,GO:0005829,GO:0005886,GO:0005887,GO:0006139,GO:0006163,GO:0006164,GO:0006182,GO:0006725,GO:0006753,GO:0006793,GO:0006796,GO:0006807,GO:0007154,GO:0007165,GO:0008074,GO:0008150,GO:0008152,GO:0009058,GO:0009117,GO:0009150,GO:0009152,GO:0009165,GO:0009187,GO:0009190,GO:0009259,GO:0009260,GO:0009975,GO:0009987,GO:0016020,GO:…	4.6.1.2	ko:K12323,ko:K12324	ANF_receptor,Ank_2,Guanylate_cyc,HNOBA,Pkinase,Pkinase_Tyr
g2775.t1	T	Natriuretic peptide receptor	NPR1	GO:0000166,GO:0001558,GO:0001653,GO:0001882,GO:0001883,GO:0003008,GO:0003013,GO:0003014,GO:0003018,GO:0003674,GO:0003824,GO:0004383,GO:0004888,GO:0004930,GO:0005488,GO:0005515,GO:0005525,GO:0005575,GO:0005622,GO:0005623,GO:0005737,GO:0005829,GO:0005886,GO:0005887,GO:0006139,GO:0006163,GO:0006164,GO:0006182,GO:0006584,GO:0006725,GO:0006753,GO:0006793,GO:0006796,GO:0006807,GO:0006810,GO:0006935,GO:…	4.6.1.2	ko:K12323,ko:K12324,ko:K12325,ko:K13140	ANF_receptor,Dimer_Tnp_hAT,Guanylate_cyc,HNOBA,Ints3,Pkinase,Pkinase_Tyr
g2861.t1	T	Adenylyl- / guanylyl cyclase, catalytic domain	-	-	4.6.1.2	ko:K12323,ko:K12324	ANF_receptor,Guanylate_cyc,HNOBA,Pkinase_Tyr
g2888.t1	S	MULE transposase domain	-	-	-	-	FLYWCH,MULE
g2897.t1	T	Receptor family ligand binding region	NPR1	GO:0000166,GO:0000302,GO:0001101,GO:0001306,GO:0001558,GO:0001653,GO:0001882,GO:0001883,GO:0002119,GO:0002164,GO:0003008,GO:0003013,GO:0003014,GO:0003018,GO:0003674,GO:0003824,GO:0004383,GO:0004888,GO:0004930,GO:0005488,GO:0005515,GO:0005525,GO:0005575,GO:0005622,GO:0005623,GO:0005737,GO:0005829,GO:0005886,GO:0005887,GO:0005929,GO:0006139,GO:0006163,GO:0006164,GO:0006182,GO:0006584,GO:0006725,GO:…	4.6.1.2	ko:K12322,ko:K12323,ko:K12324	ANF_receptor,CHDCT2,CHDNT,Chromo,DUF1086,DUF1087,Dimer_Tnp_hAT,Guanylate_cyc,HNOBA,Helicase_C,PAP2,PHD,Phosphonate-bd,Pkinase,Pkinase_Tyr,SNF2_N
g2900.t1	T	guanylate cyclase activity	-	GO:0000302,GO:0001101,GO:0001306,GO:0001558,GO:0002119,GO:0002164,GO:0003008,GO:0003674,GO:0003824,GO:0004383,GO:0005575,GO:0005623,GO:0005929,GO:0006139,GO:0006163,GO:0006164,GO:0006182,GO:0006725,GO:0006753,GO:0006793,GO:0006796,GO:0006807,GO:0006935,GO:0006950,GO:0006979,GO:0006996,GO:0007154,GO:0007165,GO:0007166,GO:0007167,GO:0007168,GO:0007275,GO:0007399,GO:0007568,GO:0007571,GO:0007584,GO:…	-	-	ANF_receptor,CHDCT2,CHDNT,Chromo,DUF1086,DUF1087,Guanylate_cyc,Helicase_C,PHD,Phosphonate-bd,Pkinase,Pkinase_Tyr,SNF2_N
g2978.t1	S	Retrotransposon gag protein	ASPRV1	GO:0003674,GO:0003824,GO:0004175,GO:0004190,GO:0005575,GO:0006508,GO:0006807,GO:0007275,GO:0008150,GO:0008152,GO:0008233,GO:0010467,GO:0016020,GO:0016021,GO:0016485,GO:0016787,GO:0019538,GO:0031224,GO:0032501,GO:0032502,GO:0043170,GO:0043588,GO:0044238,GO:0044425,GO:0048513,GO:0048731,GO:0048856,GO:0051604,GO:0070001,GO:0070011,GO:0071704,GO:0140096,GO:1901564	-	-	Asp_protease_2,RVP,RVP_2,Retrotrans_gag,gag-asp_proteas
g3032.t1	T	Olfactory receptor	TRHR	GO:0003674,GO:0004888,GO:0004930,GO:0004997,GO:0005488,GO:0005515,GO:0005575,GO:0005623,GO:0005886,GO:0005887,GO:0006873,GO:0006874,GO:0006875,GO:0007154,GO:0007165,GO:0007186,GO:0007204,GO:0008150,GO:0009986,GO:0009987,GO:0016020,GO:0016021,GO:0019725,GO:0023052,GO:0030003,GO:0031224,GO:0031226,GO:0032092,GO:0038023,GO:0042592,GO:0042802,GO:0042803,GO:0043393,GO:0043496,GO:0044093,GO:0044425,GO:…	-	ko:K04282	7tm_1
g3033.t1	-	-	-	-	-	-	DUF1258,F5_F8_type_C,Transposase_21
g3054.t1	K	oxidative stress-induced premature senescence	ARNTL	GO:0000003,GO:0000060,GO:0000122,GO:0000976,GO:0000977,GO:0000978,GO:0000980,GO:0000981,GO:0000982,GO:0000987,GO:0000988,GO:0000989,GO:0001012,GO:0001067,GO:0001076,GO:0001077,GO:0001158,GO:0001190,GO:0001228,GO:0002027,GO:0002791,GO:0003053,GO:0003674,GO:0003676,GO:0003677,GO:0003690,GO:0003700,GO:0005102,GO:0005488,GO:0005515,GO:0005575,GO:0005622,GO:0005623,GO:0005634,GO:0005654,GO:0005667,GO:…	2.3.1.48	ko:K02223,ko:K02296,ko:K09099	Glycogen_syn,HLH,PAS,PAS_11,PAS_3,PAS_9
g3065.t1	O	Astacin-like metalloendopeptidase	ASTL	GO:0000003,GO:0001775,GO:0003674,GO:0003824,GO:0004175,GO:0004222,GO:0005575,GO:0005622,GO:0005623,GO:0005737,GO:0005886,GO:0006508,GO:0006807,GO:0007155,GO:0007275,GO:0007338,GO:0007343,GO:0007610,GO:0007631,GO:0008150,GO:0008152,GO:0008233,GO:0008237,GO:0009566,GO:0009893,GO:0009987,GO:0010468,GO:0010604,GO:0010628,GO:0010954,GO:0012505,GO:0016020,GO:0016787,GO:0019222,GO:0019538,GO:0019953,GO:…	3.4.24.21	ko:K08076,ko:K08778	Astacin,CUB,F5_F8_type_C,Innexin,Laminin_G_3,Lectin_C,MAM,Methyltransf_FA,Ricin_B_lectin,ShK,TSP_1,VWD
g3118.t1	P	ZIP Zinc transporter	SLC39A9	GO:0000041,GO:0000139,GO:0003674,GO:0005215,GO:0005384,GO:0005385,GO:0005575,GO:0005622,GO:0005623,GO:0005737,GO:0005768,GO:0005770,GO:0005783,GO:0005794,GO:0005802,GO:0006810,GO:0006811,GO:0006812,GO:0006828,GO:0006829,GO:0006873,GO:0006875,GO:0008150,GO:0008324,GO:0009987,GO:0012505,GO:0015075,GO:0015318,GO:0016020,GO:0016021,GO:0019725,GO:0022857,GO:0022890,GO:0030001,GO:0030003,GO:0030026,GO:…	-	ko:K14715	F-box-like,Grp1_Fun34_YaaH,RCC1_2,RTA1,WD40,Zip
g3119.t1	GO	WSC domain containing 1	WSCD1	-	-	-	Sulfotransfer_1,WSC
g3159.t1	T	Heme NO binding associated	-	GO:0003674,GO:0003824,GO:0004383,GO:0005575,GO:0005622,GO:0005623,GO:0005737,GO:0005829,GO:0005886,GO:0005887,GO:0006139,GO:0006163,GO:0006164,GO:0006182,GO:0006725,GO:0006753,GO:0006793,GO:0006796,GO:0006807,GO:0007154,GO:0007165,GO:0008074,GO:0008150,GO:0008152,GO:0009058,GO:0009117,GO:0009150,GO:0009152,GO:0009165,GO:0009187,GO:0009190,GO:0009259,GO:0009260,GO:0009975,GO:0009987,GO:0016020,GO:…	4.6.1.2	ko:K12323,ko:K12324	ANF_receptor,Ank_2,Guanylate_cyc,HNOBA,Pkinase,Pkinase_Tyr
g3160.t1	T	guanylate cyclase activity	-	GO:0003674,GO:0003824,GO:0004383,GO:0005575,GO:0005622,GO:0005623,GO:0005737,GO:0005829,GO:0005886,GO:0005887,GO:0006139,GO:0006163,GO:0006164,GO:0006182,GO:0006725,GO:0006753,GO:0006793,GO:0006796,GO:0006807,GO:0007154,GO:0007165,GO:0008074,GO:0008150,GO:0008152,GO:0009058,GO:0009117,GO:0009150,GO:0009152,GO:0009165,GO:0009187,GO:0009190,GO:0009259,GO:0009260,GO:0009975,GO:0009987,GO:0016020,GO:…	4.6.1.2	ko:K12323,ko:K12324	ANF_receptor,Ank_2,Guanylate_cyc,HNOBA,Pkinase,Pkinase_Tyr
g3161.t1	T	to Saccharomyces cerevisiae SSK22 (YCR073C) and SSK2 (YNR031C)	MAP3K4	GO:0000003,GO:0000131,GO:0000160,GO:0000161,GO:0000165,GO:0000166,GO:0000186,GO:0001672,GO:0001708,GO:0001890,GO:0001932,GO:0001934,GO:0002251,GO:0002376,GO:0002385,GO:0003002,GO:0003006,GO:0003674,GO:0003779,GO:0003824,GO:0004672,GO:0004674,GO:0004690,GO:0004691,GO:0004709,GO:0004713,GO:0005488,GO:0005515,GO:0005524,GO:0005575,GO:0005622,GO:0005623,GO:0005737,GO:0005829,GO:0005933,GO:0005934,GO:…	2.7.11.25	ko:K04428,ko:K11230	CCDC142,CHCH,FNIP,MATH,PAS,Pkinase
g3187.t1	T	Natriuretic peptide receptor	NPR1	GO:0000166,GO:0001558,GO:0001653,GO:0001882,GO:0001883,GO:0003008,GO:0003013,GO:0003014,GO:0003018,GO:0003674,GO:0003824,GO:0004383,GO:0004888,GO:0004930,GO:0005488,GO:0005515,GO:0005525,GO:0005575,GO:0005622,GO:0005623,GO:0005737,GO:0005829,GO:0005886,GO:0005887,GO:0006139,GO:0006163,GO:0006164,GO:0006182,GO:0006584,GO:0006725,GO:0006753,GO:0006793,GO:0006796,GO:0006807,GO:0006810,GO:0006935,GO:…	4.6.1.2	ko:K12323,ko:K12324,ko:K12325,ko:K13140	ANF_receptor,Dimer_Tnp_hAT,Guanylate_cyc,HNOBA,Ints3,Pkinase,Pkinase_Tyr
g3211.t1	O	oxidation-dependent protein catabolic process	PIM1	GO:0000002,GO:0000166,GO:0001018,GO:0001067,GO:0001666,GO:0003674,GO:0003676,GO:0003677,GO:0003697,GO:0003723,GO:0003727,GO:0003824,GO:0004175,GO:0004176,GO:0004252,GO:0005488,GO:0005515,GO:0005524,GO:0005575,GO:0005622,GO:0005623,GO:0005634,GO:0005654,GO:0005737,GO:0005739,GO:0005759,GO:0005777,GO:0005829,GO:0006139,GO:0006259,GO:0006508,GO:0006515,GO:0006725,GO:0006807,GO:0006950,GO:0006979,GO:…	3.4.21.53	ko:K08675	4HBT_2,AAA,CN_hydrolase,H_PPase,Ion_trans_N,LON_substr_bdg,Lon_C,PseudoU_synth_2,RVT_1,RVT_3,S1,Snf7,TMEM18
g3243.t1	P	Solute carrier family 14 (urea transporter), member 2	SLC14A2	GO:0001101,GO:0003674,GO:0005215,GO:0005488,GO:0005515,GO:0005575,GO:0005623,GO:0005886,GO:0006810,GO:0006950,GO:0008150,GO:0009414,GO:0009415,GO:0009628,GO:0010035,GO:0015204,GO:0015840,GO:0016020,GO:0016021,GO:0016324,GO:0019755,GO:0022857,GO:0031224,GO:0042221,GO:0042886,GO:0042887,GO:0044425,GO:0044459,GO:0044464,GO:0045177,GO:0050839,GO:0050896,GO:0051179,GO:0051234,GO:0055085,GO:0071702,GO:…	-	ko:K08716	UT
g3244.t1	T	phosphorus-oxygen lyase activity. It is involved in the biological process described with	NPR2	GO:0000003,GO:0000166,GO:0001501,GO:0001558,GO:0001653,GO:0001882,GO:0001883,GO:0003008,GO:0003013,GO:0003014,GO:0003018,GO:0003674,GO:0003824,GO:0004383,GO:0004888,GO:0004930,GO:0005488,GO:0005515,GO:0005524,GO:0005525,GO:0005575,GO:0005622,GO:0005623,GO:0005737,GO:0005829,GO:0005886,GO:0005887,GO:0006139,GO:0006163,GO:0006164,GO:0006182,GO:0006584,GO:0006725,GO:0006753,GO:0006793,GO:0006796,GO:…	4.6.1.2	ko:K12323,ko:K12324	ANF_receptor,Dimer_Tnp_hAT,Guanylate_cyc,HNOBA,Pkinase,Pkinase_Tyr
g3247.t1	T	guanylate cyclase activity. It is involved in the biological process described with intracellular signal transduction	-	GO:0003674,GO:0003824,GO:0004383,GO:0005575,GO:0005622,GO:0005623,GO:0005737,GO:0005829,GO:0005886,GO:0005887,GO:0006139,GO:0006163,GO:0006164,GO:0006182,GO:0006725,GO:0006753,GO:0006793,GO:0006796,GO:0006807,GO:0007154,GO:0007165,GO:0008074,GO:0008150,GO:0008152,GO:0009058,GO:0009117,GO:0009150,GO:0009152,GO:0009165,GO:0009187,GO:0009190,GO:0009259,GO:0009260,GO:0009975,GO:0009987,GO:0016020,GO:…	4.6.1.2	ko:K12323,ko:K12324	ANF_receptor,Ank_2,Guanylate_cyc,HNOBA,Pkinase,Pkinase_Tyr
g3356.t1	Z	Belongs to the TRAFAC class myosin-kinesin ATPase superfamily. Myosin family	MYH9	GO:0000003,GO:0000146,GO:0000166,GO:0000212,GO:0000226,GO:0000278,GO:0000281,GO:0000287,GO:0000768,GO:0000902,GO:0000904,GO:0000910,GO:0001525,GO:0001541,GO:0001568,GO:0001654,GO:0001655,GO:0001664,GO:0001667,GO:0001700,GO:0001701,GO:0001709,GO:0001725,GO:0001726,GO:0001736,GO:0001738,GO:0001745,GO:0001764,GO:0001767,GO:0001768,GO:0001775,GO:0001778,GO:0001894,GO:0001931,GO:0001932,GO:0001934,GO:…	2.7.12.1	ko:K10352,ko:K10362,ko:K17751,ko:K18669	ApoL,DEAD,IQ,Myosin_N,Myosin_head,Myosin_tail_1,PDZ,gag-asp_proteas
g3392.t1	T	Receptor family ligand binding region	gcy-13	-	-	-	ANF_receptor,Guanylate_cyc,HNOBA,Pkinase,Pkinase_Tyr
g3393.t1	-	-	-	-	-	-	-
g3436.t1	T	Belongs to the protein-tyrosine phosphatase family. Non-receptor class myotubularin subfamily	SBF1	GO:0000003,GO:0000123,GO:0000278,GO:0001558,GO:0001691,GO:0003674,GO:0003682,GO:0003824,GO:0004721,GO:0004857,GO:0005085,GO:0005088,GO:0005488,GO:0005515,GO:0005575,GO:0005622,GO:0005623,GO:0005634,GO:0005654,GO:0005694,GO:0005700,GO:0005737,GO:0005768,GO:0005783,GO:0005789,GO:0005829,GO:0005938,GO:0006325,GO:0006355,GO:0006357,GO:0006464,GO:0006470,GO:0006473,GO:0006475,GO:0006479,GO:0006629,GO:…	-	ko:K18061	C1_1,DENN,GRAM,Myotub-related,PH,Peptidase_M19,Ribosomal_S27e,SBF2,dDENN,uDENN
g3440.t1	O	Zinc-dependent metalloprotease	MEP1B	GO:0003674,GO:0003824,GO:0004175,GO:0004222,GO:0005488,GO:0005515,GO:0005575,GO:0005623,GO:0005886,GO:0005887,GO:0006508,GO:0006807,GO:0006810,GO:0007275,GO:0007610,GO:0007631,GO:0008150,GO:0008152,GO:0008233,GO:0008237,GO:0016020,GO:0016021,GO:0016787,GO:0017090,GO:0019538,GO:0031224,GO:0031226,GO:0032501,GO:0032502,GO:0032991,GO:0035295,GO:0042755,GO:0042802,GO:0043050,GO:0043170,GO:0044238,GO:…	3.4.24.21,3.4.24.63	ko:K08076,ko:K08606	Astacin,EGF,Histone,MAM,ShK,TSP_1,Trypsin
g3441.t1	S	Belongs to the transient receptor (TC 1.A.4) family	TRPA1	GO:0000302,GO:0001580,GO:0002791,GO:0002793,GO:0003008,GO:0003012,GO:0003674,GO:0004888,GO:0005034,GO:0005215,GO:0005216,GO:0005217,GO:0005244,GO:0005245,GO:0005261,GO:0005262,GO:0005488,GO:0005515,GO:0005575,GO:0005623,GO:0005886,GO:0005887,GO:0006810,GO:0006811,GO:0006812,GO:0006816,GO:0006873,GO:0006874,GO:0006875,GO:0006936,GO:0006939,GO:0006950,GO:0006979,GO:0007154,GO:0007165,GO:0007166,GO:…	-	ko:K04984	Ank,Ank_2,Ank_3,Ank_4,Ion_trans,RCC1
g3442.t1	S	RNA transmembrane transporter activity	SIDT1	GO:0000323,GO:0003674,GO:0003676,GO:0003723,GO:0003725,GO:0005488,GO:0005496,GO:0005575,GO:0005622,GO:0005623,GO:0005737,GO:0005764,GO:0005768,GO:0005773,GO:0005794,GO:0005886,GO:0006810,GO:0006869,GO:0008150,GO:0008289,GO:0010876,GO:0012505,GO:0015485,GO:0015850,GO:0015918,GO:0016020,GO:0030301,GO:0031410,GO:0031982,GO:0032934,GO:0033036,GO:0035376,GO:0036094,GO:0043178,GO:0043226,GO:0043227,GO:…	-	-	SID-1_RNA_chan
g3526.t1	T	lipoprotein receptor-related protein	LRP1B	GO:0001701,GO:0003674,GO:0005041,GO:0005102,GO:0005488,GO:0005515,GO:0005575,GO:0006810,GO:0006897,GO:0006898,GO:0007275,GO:0008104,GO:0008150,GO:0009790,GO:0009792,GO:0015031,GO:0015833,GO:0016020,GO:0016192,GO:0030228,GO:0030334,GO:0032501,GO:0032502,GO:0032879,GO:0032991,GO:0033036,GO:0038024,GO:0040012,GO:0042886,GO:0043009,GO:0043235,GO:0045184,GO:0048856,GO:0050750,GO:0050789,GO:0050794,GO:…	-	ko:K04550,ko:K20049	DUF5050,EGF,EGF_CA,FXa_inhibition,Ldl_recept_a,Ldl_recept_b,cEGF
g3533.t1	T	guanylate cyclase activity	-	GO:0003674,GO:0003824,GO:0004383,GO:0005575,GO:0005622,GO:0005623,GO:0005737,GO:0005829,GO:0005886,GO:0005887,GO:0006139,GO:0006163,GO:0006164,GO:0006182,GO:0006725,GO:0006753,GO:0006793,GO:0006796,GO:0006807,GO:0007154,GO:0007165,GO:0008074,GO:0008150,GO:0008152,GO:0009058,GO:0009117,GO:0009150,GO:0009152,GO:0009165,GO:0009187,GO:0009190,GO:0009259,GO:0009260,GO:0009975,GO:0009987,GO:0016020,GO:…	4.6.1.2	ko:K12323,ko:K12324,ko:K12325	ANF_receptor,Ank_2,Guanylate_cyc,HNOBA,Pkinase,Pkinase_Tyr
g3558.t1	O	Belongs to the peptidase S1 family	Tpsg1	GO:0003674,GO:0003824,GO:0006508,GO:0006807,GO:0008150,GO:0008152,GO:0008233,GO:0008236,GO:0016787,GO:0017171,GO:0019538,GO:0043170,GO:0044238,GO:0070011,GO:0071704,GO:0140096,GO:1901564	3.4.21.1,3.4.21.4	ko:K01310,ko:K01312,ko:K09615,ko:K09628	Chitin_bind_4,NIDO,Somatomedin_B,Trypsin
g3710.t1	T	Immunoglobulin	NCAM2	GO:0000003,GO:0000139,GO:0000165,GO:0000902,GO:0000904,GO:0001654,GO:0001746,GO:0001928,GO:0002009,GO:0002165,GO:0002237,GO:0002376,GO:0003006,GO:0003008,GO:0003674,GO:0005085,GO:0005088,GO:0005102,GO:0005104,GO:0005488,GO:0005515,GO:0005575,GO:0005576,GO:0005622,GO:0005623,GO:0005634,GO:0005654,GO:0005737,GO:0005794,GO:0005829,GO:0005886,GO:0005911,GO:0006464,GO:0006468,GO:0006793,GO:0006796,GO:…	-	ko:K06491	Aminotran_5,Copine,I-set,Ig_3,Zona_pellucida,fn3,ig
g3712.t1	T	Heme NO binding associated	-	GO:0003674,GO:0003824,GO:0004383,GO:0005575,GO:0005622,GO:0005623,GO:0005737,GO:0005829,GO:0005886,GO:0005887,GO:0006139,GO:0006163,GO:0006164,GO:0006182,GO:0006725,GO:0006753,GO:0006793,GO:0006796,GO:0006807,GO:0007154,GO:0007165,GO:0008074,GO:0008150,GO:0008152,GO:0009058,GO:0009117,GO:0009150,GO:0009152,GO:0009165,GO:0009187,GO:0009190,GO:0009259,GO:0009260,GO:0009975,GO:0009987,GO:0016020,GO:…	4.6.1.2	ko:K12323,ko:K12324	ANF_receptor,Ank_2,Guanylate_cyc,HNOBA,Pkinase,Pkinase_Tyr
g3778.t1	T	Serine/Threonine protein kinases, catalytic domain	IKS1	GO:0000186,GO:0001817,GO:0001819,GO:0001932,GO:0001934,GO:0002682,GO:0003674,GO:0003676,GO:0003723,GO:0003725,GO:0003824,GO:0004672,GO:0004674,GO:0004694,GO:0005488,GO:0005515,GO:0005575,GO:0005622,GO:0005623,GO:0005634,GO:0005737,GO:0005829,GO:0005840,GO:0006355,GO:0006417,GO:0006446,GO:0006464,GO:0006468,GO:0006793,GO:0006796,GO:0006807,GO:0006950,GO:0007154,GO:0008150,GO:0008152,GO:0008285,GO:…	-	ko:K08286	DPM2,DUF3506,DUF3844,MFS_1,Mito_carr,Pal1,Peptidase_S8,Pkinase
g3779.t1	Z	Belongs to the TRAFAC class myosin-kinesin ATPase superfamily. Myosin family	MYO6	GO:0000003,GO:0000139,GO:0000146,GO:0000166,GO:0000226,GO:0000278,GO:0000323,GO:0000428,GO:0001667,GO:0001700,GO:0001709,GO:0001726,GO:0002009,GO:0002064,GO:0002065,GO:0002066,GO:0002164,GO:0002165,GO:0002168,GO:0003006,GO:0003008,GO:0003674,GO:0003774,GO:0003779,GO:0003824,GO:0005488,GO:0005515,GO:0005516,GO:0005575,GO:0005576,GO:0005622,GO:0005623,GO:0005634,GO:0005635,GO:0005654,GO:0005737,GO:…	-	ko:K10357,ko:K10358	IQ,Myosin-VI_CBD,Myosin_N,Myosin_head,PX,Pkinase
g3782.t1	T	natriuretic peptide receptor activity	NPR1	GO:0000003,GO:0000166,GO:0001501,GO:0001558,GO:0001653,GO:0001882,GO:0001883,GO:0003008,GO:0003013,GO:0003014,GO:0003018,GO:0003674,GO:0003824,GO:0004383,GO:0004888,GO:0004930,GO:0005488,GO:0005515,GO:0005524,GO:0005525,GO:0005575,GO:0005622,GO:0005623,GO:0005737,GO:0005829,GO:0005886,GO:0005887,GO:0006139,GO:0006163,GO:0006164,GO:0006182,GO:0006584,GO:0006725,GO:0006753,GO:0006793,GO:0006796,GO:…	4.6.1.2	ko:K12323,ko:K12324,ko:K12325	ANF_receptor,Dimer_Tnp_hAT,Guanylate_cyc,HNOBA,Pkinase,Pkinase_Tyr
g3783.t1	T	guanylate cyclase activity	-	-	4.6.1.2	ko:K12323,ko:K12324,ko:K12325	ANF_receptor,Guanylate_cyc,Pkinase,Pkinase_Tyr
g3787.t1	I	transporter activity. It is involved in the biological process described with transport	SEC14L2	GO:0003674,GO:0003824,GO:0005488,GO:0005543,GO:0005575,GO:0005622,GO:0005623,GO:0005634,GO:0005737,GO:0005829,GO:0005886,GO:0006355,GO:0006937,GO:0008047,GO:0008150,GO:0008289,GO:0008431,GO:0009889,GO:0009891,GO:0009893,GO:0010468,GO:0010556,GO:0010557,GO:0010604,GO:0010628,GO:0010893,GO:0010959,GO:0015459,GO:0016020,GO:0016247,GO:0016740,GO:0016765,GO:0019216,GO:0019218,GO:0019219,GO:0019222,GO:…	2.8.2.11	ko:K01019,ko:K16600	CRAL_TRIO,CRAL_TRIO_N,DDE_3,GOLD_2,Gal-3-0_sulfotr,Galactosyl_T,Glycoprotein,MFS_1,MTP18,Pescadillo_N,RVT_1,TTL,UNC-93,WSN
g3794.t1	T	It is involved in the biological process described with	-	GO:0003674,GO:0003824,GO:0004383,GO:0005575,GO:0005622,GO:0005623,GO:0005737,GO:0005829,GO:0005886,GO:0005887,GO:0006139,GO:0006163,GO:0006164,GO:0006182,GO:0006725,GO:0006753,GO:0006793,GO:0006796,GO:0006807,GO:0007154,GO:0007165,GO:0008074,GO:0008150,GO:0008152,GO:0009058,GO:0009117,GO:0009150,GO:0009152,GO:0009165,GO:0009187,GO:0009190,GO:0009259,GO:0009260,GO:0009975,GO:0009987,GO:0016020,GO:…	4.6.1.2	ko:K12323,ko:K12324	ANF_receptor,Ank_2,Guanylate_cyc,HNOBA,Pkinase,Pkinase_Tyr
g3851.t1	C	Catalytic subunit of the peripheral V1 complex of vacuolar ATPase (V-ATPase). V-ATPase is responsible for acidifying a variety of intracellular compartments in eukaryotic cells	ATP6V1G1	GO:0000041,GO:0000166,GO:0000221,GO:0000322,GO:0000323,GO:0000324,GO:0000325,GO:0000329,GO:0000331,GO:0001700,GO:0001763,GO:0002009,GO:0003674,GO:0003824,GO:0005215,GO:0005488,GO:0005515,GO:0005524,GO:0005575,GO:0005622,GO:0005623,GO:0005737,GO:0005764,GO:0005765,GO:0005773,GO:0005774,GO:0005794,GO:0005829,GO:0005886,GO:0006139,GO:0006163,GO:0006164,GO:0006725,GO:0006753,GO:0006754,GO:0006793,GO:…	3.1.1.3	ko:K01046,ko:K02152	AA_permease_2,ADH_N,MCU,SIP1,V-ATPase_G
g3852.t1	T	cell death in response to hydrogen peroxide	SIGMAR1	GO:0000247,GO:0000302,GO:0001653,GO:0003674,GO:0003824,GO:0004888,GO:0004930,GO:0004985,GO:0005488,GO:0005515,GO:0005575,GO:0005622,GO:0005623,GO:0005634,GO:0005635,GO:0005737,GO:0005783,GO:0005886,GO:0005887,GO:0006066,GO:0006629,GO:0006694,GO:0006696,GO:0006950,GO:0006979,GO:0007154,GO:0007165,GO:0007186,GO:0007275,GO:0007399,GO:0008144,GO:0008150,GO:0008152,GO:0008202,GO:0008204,GO:0008219,GO:…	-	ko:K09829,ko:K11997,ko:K12183,ko:K20719	ERG2_Sigma1R,Homeobox,NHL,PEP_mutase,UEV,Vps23_core,zf-B_box,zf-C3HC4_3
g3856.t1	-	-	-	-	-	-	DUF1258,Transposase_21
g3885.t1	-	-	-	-	-	-	7TM_GPCR_Srw,DNA_pol_B_2
g3940.t1	T	Adenylyl- / guanylyl cyclase, catalytic domain	-	-	4.6.1.2	ko:K12323,ko:K12324	ANF_receptor,Guanylate_cyc,Pkinase_Tyr
g3961.t1	T	melatonin receptor activity	MTNR1A	GO:0000003,GO:0001654,GO:0002791,GO:0002792,GO:0003008,GO:0003013,GO:0003018,GO:0003674,GO:0004888,GO:0004930,GO:0005488,GO:0005575,GO:0005623,GO:0005886,GO:0005887,GO:0006109,GO:0006110,GO:0006140,GO:0006873,GO:0006874,GO:0006875,GO:0007154,GO:0007165,GO:0007186,GO:0007187,GO:0007188,GO:0007193,GO:0007267,GO:0007268,GO:0007275,GO:0007423,GO:0007568,GO:0007610,GO:0007617,GO:0007618,GO:0007623,GO:…	-	ko:K04160,ko:K04250,ko:K04255,ko:K04256,ko:K04285,ko:K04286,ko:K08409,ko:K08421,ko:K18627	7tm_1,ATG27,Kinesin
g4088.t1	-	-	-	-	-	-	-
g4146.t1	S	DNA polymerase type B, organellar and viral	-	-	-	-	7TM_GPCR_Srw,DNA_pol_B_2,Rho_N
g4147.t1	-	-	-	-	-	-	7TM_GPCR_Srw,DNA_pol_B_2,Rho_N
g4193.t1	S	Atlastin GTPase 2	ATL2	GO:0000166,GO:0000226,GO:0001558,GO:0001882,GO:0001883,GO:0003674,GO:0003824,GO:0003924,GO:0005488,GO:0005515,GO:0005525,GO:0005575,GO:0005622,GO:0005623,GO:0005737,GO:0005783,GO:0005789,GO:0005794,GO:0006996,GO:0007010,GO:0007017,GO:0007019,GO:0007029,GO:0007030,GO:0007275,GO:0007399,GO:0007416,GO:0007517,GO:0007528,GO:0008150,GO:0008361,GO:0008582,GO:0009987,GO:0010256,GO:0010720,GO:0010769,GO:…	-	ko:K17339	Calreticulin,GBP,GBP_C,Hormone_recep,zf-C4
g4194.t1	O	Belongs to the peptidase S1 family	-	-	3.4.21.109,3.4.21.120,3.4.21.4,3.4.21.7	ko:K01312,ko:K01315,ko:K01362,ko:K08670,ko:K20111	CUB,Ldl_recept_a,MAM,Trypsin,VWA,fn3
g4273.t1	K	sequence-specific DNA binding. It is involved in the biological process described with regulation of transcription, DNA-templated	zip-7	GO:0000976,GO:0000977,GO:0000981,GO:0000982,GO:0001012,GO:0001067,GO:0001077,GO:0001228,GO:0003674,GO:0003676,GO:0003677,GO:0003690,GO:0003700,GO:0005488,GO:0005515,GO:0005575,GO:0005622,GO:0005623,GO:0005634,GO:0006139,GO:0006351,GO:0006355,GO:0006357,GO:0006366,GO:0006725,GO:0006807,GO:0007275,GO:0008150,GO:0008152,GO:0009058,GO:0009059,GO:0009889,GO:0009891,GO:0009893,GO:0009987,GO:0010467,GO:…	-	ko:K09057	bZIP_2
g4274.t1	U	protein-cysteine S-acyltransferase activity	YKT6	GO:0000139,GO:0000149,GO:0000322,GO:0000323,GO:0000324,GO:0003674,GO:0003824,GO:0005484,GO:0005488,GO:0005515,GO:0005575,GO:0005622,GO:0005623,GO:0005737,GO:0005739,GO:0005768,GO:0005773,GO:0005783,GO:0005793,GO:0005794,GO:0005829,GO:0005886,GO:0005887,GO:0006810,GO:0006886,GO:0006887,GO:0006888,GO:0006890,GO:0006891,GO:0006903,GO:0006904,GO:0006906,GO:0006996,GO:0007033,GO:0008104,GO:0008150,GO:…	3.1.3.16,4.1.2.13	ko:K01623,ko:K08516,ko:K18999	ALG11_N,BRCT,CHCH,Costars,Glycolytic,Glycos_transf_1,Histone,Longin,NIF,Synaptobrevin
g4347.t1	T	It is involved in the biological process described with	-	GO:0003674,GO:0003824,GO:0004383,GO:0005575,GO:0005622,GO:0005623,GO:0005737,GO:0005829,GO:0005886,GO:0005887,GO:0006139,GO:0006163,GO:0006164,GO:0006182,GO:0006725,GO:0006753,GO:0006793,GO:0006796,GO:0006807,GO:0007154,GO:0007165,GO:0008074,GO:0008150,GO:0008152,GO:0009058,GO:0009117,GO:0009150,GO:0009152,GO:0009165,GO:0009187,GO:0009190,GO:0009259,GO:0009260,GO:0009975,GO:0009987,GO:0016020,GO:…	4.6.1.2	ko:K12323,ko:K12324	ANF_receptor,Ank_2,Guanylate_cyc,HNOBA,Pkinase,Pkinase_Tyr
g4530.t1	K	medial motor column neuron differentiation	LHX3	GO:0000003,GO:0000166,GO:0000902,GO:0000904,GO:0000976,GO:0000977,GO:0000981,GO:0000988,GO:0000989,GO:0001012,GO:0001067,GO:0001076,GO:0001085,GO:0001228,GO:0001708,GO:0001890,GO:0003002,GO:0003006,GO:0003674,GO:0003676,GO:0003677,GO:0003690,GO:0003700,GO:0005488,GO:0005515,GO:0005575,GO:0005622,GO:0005623,GO:0005634,GO:0005654,GO:0005667,GO:0006139,GO:0006351,GO:0006355,GO:0006357,GO:0006366,GO:…	-	ko:K09374,ko:K09378	Homeobox,LIM
g4609.t1	S	Ig-like domain from next to BRCA1 gene	NBR1	GO:0000322,GO:0000323,GO:0000324,GO:0000328,GO:0000407,GO:0001932,GO:0003674,GO:0005488,GO:0005515,GO:0005575,GO:0005622,GO:0005623,GO:0005634,GO:0005654,GO:0005737,GO:0005768,GO:0005770,GO:0005771,GO:0005773,GO:0005775,GO:0005776,GO:0005829,GO:0006914,GO:0008104,GO:0008150,GO:0008152,GO:0009056,GO:0009966,GO:0009987,GO:0010646,GO:0012505,GO:0016043,GO:0016236,GO:0016604,GO:0019220,GO:0019222,GO:…	2.1.1.62	ko:K05925,ko:K17987,ko:K21997	ATG19_autophagy,BRX,C1_2,DUF3632,EF-hand_1,EF-hand_7,MRP-L51,MT-A70,MatE,N_BRCA1_IG,PB1,Rep-A_N,ZZ,zf-C3HC4_2
g4716.t1	T	It is involved in the biological process described with	-	GO:0003674,GO:0003824,GO:0004383,GO:0005575,GO:0005622,GO:0005623,GO:0005737,GO:0005829,GO:0005886,GO:0005887,GO:0006139,GO:0006163,GO:0006164,GO:0006182,GO:0006725,GO:0006753,GO:0006793,GO:0006796,GO:0006807,GO:0007154,GO:0007165,GO:0008074,GO:0008150,GO:0008152,GO:0009058,GO:0009117,GO:0009150,GO:0009152,GO:0009165,GO:0009187,GO:0009190,GO:0009259,GO:0009260,GO:0009975,GO:0009987,GO:0016020,GO:…	4.6.1.2	ko:K12323,ko:K12324	ANF_receptor,Ank_2,Guanylate_cyc,HNOBA,Pkinase,Pkinase_Tyr
g4718.t1	L	Integrase core domain	-	-	-	-	Baculo_F,Chromo,Pkinase,rve
g4722.t1	-	-	-	-	-	-	Helitron_like_N
g4746.t1	OU	K02A2.6-like	-	-	-	-	7TM_GPCR_Srx,AT_hook,Asp_protease_2,Baculo_F,Glycoprotein_B,LMF1,RVP,RVT_1,RVT_3,Retrotrans_gag,SAP,gag-asp_proteas,rve,zf-CCHC,zf-CCHC_3,zf-H2C2
g4748.t1	S	lymphoid lineage cell migration into thymus	BCL11A	GO:0000122,GO:0000902,GO:0000904,GO:0000976,GO:0000977,GO:0000978,GO:0000981,GO:0000982,GO:0000987,GO:0001012,GO:0001067,GO:0001077,GO:0001078,GO:0001227,GO:0001228,GO:0001558,GO:0001654,GO:0001775,GO:0002064,GO:0002200,GO:0002376,GO:0002520,GO:0002521,GO:0002562,GO:0002568,GO:0002681,GO:0002791,GO:0002792,GO:0003334,GO:0003382,GO:0003674,GO:0003676,GO:0003677,GO:0003690,GO:0003700,GO:0003712,GO:…	-	ko:K22045,ko:K22046	FAM177,zf-C2H2
g4850.t1	A	Belongs to the DEAD box helicase family	DDX47	GO:0000339,GO:0000462,GO:0003674,GO:0003676,GO:0003723,GO:0003724,GO:0003725,GO:0003729,GO:0003824,GO:0004004,GO:0004386,GO:0005488,GO:0005575,GO:0005622,GO:0005623,GO:0005634,GO:0005654,GO:0005730,GO:0005737,GO:0005829,GO:0006139,GO:0006364,GO:0006396,GO:0006412,GO:0006413,GO:0006518,GO:0006725,GO:0006807,GO:0006915,GO:0007154,GO:0007165,GO:0007166,GO:0008026,GO:0008135,GO:0008150,GO:0008152,GO:…	3.6.4.13	ko:K10352,ko:K14777	DEAD,Helicase_C,IQ,Myosin_head,Myosin_tail_1
g4882.t1	T	melatonin receptor activity	MTNR1A	GO:0000003,GO:0001654,GO:0002791,GO:0002792,GO:0003008,GO:0003013,GO:0003018,GO:0003674,GO:0004888,GO:0004930,GO:0005488,GO:0005575,GO:0005623,GO:0005886,GO:0005887,GO:0006109,GO:0006110,GO:0006140,GO:0006873,GO:0006874,GO:0006875,GO:0007154,GO:0007165,GO:0007186,GO:0007187,GO:0007188,GO:0007193,GO:0007267,GO:0007268,GO:0007275,GO:0007423,GO:0007568,GO:0007610,GO:0007617,GO:0007618,GO:0007623,GO:…	2.7.10.2	ko:K04250,ko:K04255,ko:K04256,ko:K04285,ko:K04286,ko:K05728,ko:K08409	7tm_1,7tm_2,ATG27,Cupin_8,DEP,FYVE,GPS,Pkinase_Tyr,SH2
g4904.t1	J	lysyl-tRNA synthetase	KARS	GO:0000003,GO:0000049,GO:0000165,GO:0000166,GO:0000187,GO:0001775,GO:0001817,GO:0001819,GO:0001932,GO:0001934,GO:0002181,GO:0002252,GO:0002263,GO:0002274,GO:0002275,GO:0002276,GO:0002366,GO:0002376,GO:0002682,GO:0002684,GO:0002685,GO:0002687,GO:0002688,GO:0002690,GO:0002694,GO:0002696,GO:0002697,GO:0002699,GO:0002700,GO:0002702,GO:0002718,GO:0002720,GO:0002739,GO:0002741,GO:0002791,GO:0002793,GO:…	6.1.1.6	ko:K04567	PHD,RAI16-like,RHD_DNA_bind,RHD_dimer,SPOC,TFIIS_M,tRNA-synt_2,tRNA_anti-codon
g4905.t1	J	lysyl-tRNA aminoacylation	KARS	GO:0000003,GO:0000049,GO:0000165,GO:0000166,GO:0000187,GO:0001775,GO:0001817,GO:0001819,GO:0001932,GO:0001934,GO:0002181,GO:0002252,GO:0002263,GO:0002274,GO:0002275,GO:0002276,GO:0002366,GO:0002376,GO:0002682,GO:0002684,GO:0002685,GO:0002687,GO:0002688,GO:0002690,GO:0002694,GO:0002696,GO:0002697,GO:0002699,GO:0002700,GO:0002702,GO:0002718,GO:0002720,GO:0002739,GO:0002741,GO:0002791,GO:0002793,GO:…	6.1.1.6	ko:K04567	PHD,RAI16-like,RHD_DNA_bind,RHD_dimer,SPOC,TFIIS_M,tRNA-synt_2,tRNA_anti-codon
g4906.t1	J	lysyl-tRNA aminoacylation	KARS	GO:0000003,GO:0000049,GO:0000165,GO:0000166,GO:0000187,GO:0001775,GO:0001817,GO:0001819,GO:0001932,GO:0001934,GO:0002181,GO:0002252,GO:0002263,GO:0002274,GO:0002275,GO:0002276,GO:0002366,GO:0002376,GO:0002682,GO:0002684,GO:0002685,GO:0002687,GO:0002688,GO:0002690,GO:0002694,GO:0002696,GO:0002697,GO:0002699,GO:0002700,GO:0002702,GO:0002718,GO:0002720,GO:0002739,GO:0002741,GO:0002791,GO:0002793,GO:…	6.1.1.6	ko:K04567	PHD,RAI16-like,RHD_DNA_bind,RHD_dimer,SPOC,TFIIS_M,tRNA-synt_2,tRNA_anti-codon
g4909.t1	O	Ubiquitin carboxyl-terminal hydrolase	USP5	GO:0000003,GO:0000323,GO:0001654,GO:0001745,GO:0001751,GO:0001754,GO:0001932,GO:0001933,GO:0003006,GO:0003674,GO:0003824,GO:0004175,GO:0004197,GO:0004843,GO:0005488,GO:0005515,GO:0005575,GO:0005622,GO:0005623,GO:0005634,GO:0005654,GO:0005737,GO:0005764,GO:0005773,GO:0005829,GO:0006109,GO:0006111,GO:0006355,GO:0006464,GO:0006508,GO:0006511,GO:0006807,GO:0006950,GO:0007275,GO:0007399,GO:0007423,GO:…	3.4.19.12	ko:K11836	CAP_GLY,DASH_Dad2,DNA_pol_phi,HTH_Tnp_Tc5,HTH_psq,Lactamase_B_6,Med4,PARG_cat,Peptidase_C1,UBA,UCH,UCH_1,XPG_I,zf-UBP
g4910.t1	J	RNA binding. It is involved in the biological process described with	MRPL21	GO:0000313,GO:0000315,GO:0003674,GO:0003735,GO:0005198,GO:0005575,GO:0005622,GO:0005623,GO:0005737,GO:0005739,GO:0005740,GO:0005743,GO:0005759,GO:0005761,GO:0005762,GO:0005840,GO:0006412,GO:0006414,GO:0006415,GO:0006518,GO:0006807,GO:0008150,GO:0008152,GO:0009058,GO:0009059,GO:0009987,GO:0010467,GO:0015934,GO:0016020,GO:0016043,GO:0019538,GO:0019866,GO:0022411,GO:0031090,GO:0031966,GO:0031967,GO:…	-	ko:K02888	AlaDh_PNT_N,KH_1,Ribosomal_L21p,Sacchrp_dh_C,Sacchrp_dh_NADP,WD40,zf-HIT
g4988.t1	S	Tetraspanin family	-	-	-	ko:K17352	Tetraspannin
g4989.t1	KO	protein serine/threonine phosphatase activity	UBLCP1	GO:0003674,GO:0003824,GO:0004721,GO:0004722,GO:0005575,GO:0005622,GO:0005623,GO:0005634,GO:0005730,GO:0006464,GO:0006470,GO:0006793,GO:0006796,GO:0006807,GO:0008150,GO:0008152,GO:0009987,GO:0016311,GO:0016787,GO:0016788,GO:0016791,GO:0019538,GO:0031974,GO:0031981,GO:0036211,GO:0042578,GO:0043170,GO:0043226,GO:0043227,GO:0043228,GO:0043229,GO:0043231,GO:0043232,GO:0043233,GO:0043412,GO:0044237,GO:…	3.1.3.16	ko:K17618	COMM_domain,FAM193_C,NIF,WEMBL,ubiquitin
g5151.t1	S	Transient receptor potential cation channel, subfamily A, member	TRPA1	GO:0000302,GO:0001580,GO:0002791,GO:0002793,GO:0003008,GO:0003012,GO:0003674,GO:0004888,GO:0005034,GO:0005215,GO:0005216,GO:0005217,GO:0005244,GO:0005245,GO:0005261,GO:0005262,GO:0005488,GO:0005515,GO:0005575,GO:0005623,GO:0005886,GO:0005887,GO:0006810,GO:0006811,GO:0006812,GO:0006816,GO:0006873,GO:0006874,GO:0006875,GO:0006936,GO:0006939,GO:0006950,GO:0006979,GO:0007154,GO:0007165,GO:0007166,GO:…	-	ko:K04984	Ank,Ank_2,Ank_3,Ank_4,Ion_trans,RCC1
g5214.t1	V	ATPase activity, coupled to transmembrane movement of substances	-	-	-	-	ABC_membrane,ABC_tran,AOX,Transposase_21
g5216.t1	Z	Belongs to the TRAFAC class myosin-kinesin ATPase superfamily. Myosin family	MYO7A	GO:0000146,GO:0000166,GO:0000323,GO:0000902,GO:0000904,GO:0001654,GO:0001750,GO:0001754,GO:0001845,GO:0001917,GO:0002009,GO:0002064,GO:0002065,GO:0002066,GO:0002093,GO:0002139,GO:0002140,GO:0002164,GO:0002165,GO:0002168,GO:0003002,GO:0003008,GO:0003674,GO:0003774,GO:0003779,GO:0003824,GO:0005488,GO:0005515,GO:0005516,GO:0005524,GO:0005575,GO:0005576,GO:0005622,GO:0005623,GO:0005737,GO:0005764,GO:…	-	ko:K10359,ko:K21868	DUF4729,DUF4817,FERM_M,FERM_N,IQ,MyTH4,Myosin_head,SH3_1,SH3_2,SH3_9
g5362.t1	T	Growth factor receptor	PDGFRB	GO:0000003,GO:0000165,GO:0000302,GO:0000323,GO:0001101,GO:0001501,GO:0001525,GO:0001568,GO:0001570,GO:0001654,GO:0001655,GO:0001656,GO:0001701,GO:0001822,GO:0001894,GO:0001932,GO:0001934,GO:0001944,GO:0003006,GO:0003338,GO:0003674,GO:0003824,GO:0004672,GO:0004713,GO:0004714,GO:0004888,GO:0004930,GO:0004992,GO:0005017,GO:0005019,GO:0005085,GO:0005088,GO:0005102,GO:0005161,GO:0005488,GO:0005515,GO:…	2.7.10.1	ko:K04363,ko:K05089,ko:K05090,ko:K05091,ko:K05092,ko:K05096,ko:K05097,ko:K05098	I-set,Ig_2,Ig_3,Pkinase_Tyr,ig
g5434.t1	M	metalloendopeptidase activity	-	-	-	-	Hemopexin,Homeobox,MAM,PG_binding_1,fn2
g5454.t1	T	Receptor family ligand binding region	NPR1	GO:0000166,GO:0001558,GO:0001653,GO:0001882,GO:0001883,GO:0003008,GO:0003013,GO:0003014,GO:0003018,GO:0003674,GO:0003824,GO:0004383,GO:0004888,GO:0004930,GO:0005488,GO:0005515,GO:0005525,GO:0005575,GO:0005622,GO:0005623,GO:0005737,GO:0005829,GO:0005886,GO:0005887,GO:0006139,GO:0006163,GO:0006164,GO:0006182,GO:0006584,GO:0006725,GO:0006753,GO:0006793,GO:0006796,GO:0006807,GO:0006810,GO:0006935,GO:…	4.6.1.2	ko:K12323,ko:K12324,ko:K12325	ANF_receptor,Dimer_Tnp_hAT,Guanylate_cyc,HNOBA,Pkinase,Pkinase_Tyr
g5459.t1	T	mitogen-activated protein kinase	tmk1	GO:0000003,GO:0000165,GO:0000166,GO:0000278,GO:0000302,GO:0000746,GO:0000747,GO:0000749,GO:0000750,GO:0001402,GO:0001403,GO:0001556,GO:0001654,GO:0001745,GO:0001751,GO:0001752,GO:0001754,GO:0001932,GO:0001933,GO:0002009,GO:0002119,GO:0002164,GO:0002165,GO:0002252,GO:0002376,GO:0002831,GO:0002833,GO:0003002,GO:0003006,GO:0003674,GO:0003824,GO:0004672,GO:0004674,GO:0004707,GO:0005488,GO:0005515,GO:…	2.7.11.24	ko:K04371	Pkinase
g5485.t1	H	lysosomal microautophagy	ATG7	GO:0000003,GO:0000045,GO:0000302,GO:0000407,GO:0000422,GO:0000902,GO:0000904,GO:0001101,GO:0001775,GO:0001889,GO:0002119,GO:0002164,GO:0002165,GO:0002252,GO:0002263,GO:0002274,GO:0002275,GO:0002283,GO:0002366,GO:0002376,GO:0002443,GO:0002444,GO:0002446,GO:0002682,GO:0002697,GO:0002791,GO:0002793,GO:0002831,GO:0003006,GO:0003008,GO:0003674,GO:0003824,GO:0004839,GO:0005488,GO:0005515,GO:0005575,GO:…	3.5.4.12,3.6.4.13	ko:K01493,ko:K08337,ko:K13117	ATG7_N,DEAD,DUF2462,Glyco_hydro_12,HA2,Helicase_C,MNR,ThiF,dCMP_cyt_deam_1,mRNA_cap_C,mRNA_cap_enzyme
g5513.t1	U	Vault protein inter-alpha-trypsin domain	-	GO:0000003,GO:0003006,GO:0003674,GO:0005488,GO:0005515,GO:0007275,GO:0007276,GO:0007281,GO:0007292,GO:0008150,GO:0009790,GO:0009792,GO:0009987,GO:0019953,GO:0022412,GO:0022414,GO:0030154,GO:0032501,GO:0032502,GO:0032504,GO:0044703,GO:0048468,GO:0048477,GO:0048609,GO:0048856,GO:0048869,GO:0051704	-	ko:K07936	Nucleoporin_FG,Ras,VIT,VWA_3
g5514.t1	S	von Willebrand factor type A domain	VWA5A	GO:0005575,GO:0005622,GO:0005623,GO:0005634,GO:0005654,GO:0031974,GO:0031981,GO:0043226,GO:0043227,GO:0043229,GO:0043231,GO:0043233,GO:0044422,GO:0044424,GO:0044428,GO:0044446,GO:0044464,GO:0070013	-	-	GSP_synth,Nucleoporin_FG,UBA_4,VIT,VIT_2,VWA_2,VWA_3
g5686.t1	S	DDE superfamily endonuclease	-	-	-	-	DDE_1,HTH_Tnp_Tc5,HTH_psq
g5686.t2	S	DDE superfamily endonuclease	-	-	-	-	DDE_1,HTH_Tnp_Tc5,HTH_psq
g5687.t1	O	Low-density lipoprotein receptor domain class A	-	GO:0000003,GO:0001775,GO:0002064,GO:0002065,GO:0002066,GO:0003002,GO:0003006,GO:0003674,GO:0003824,GO:0004175,GO:0004252,GO:0006508,GO:0006807,GO:0007154,GO:0007165,GO:0007166,GO:0007275,GO:0007276,GO:0007281,GO:0007292,GO:0007304,GO:0007306,GO:0007308,GO:0007309,GO:0007310,GO:0007338,GO:0007343,GO:0007389,GO:0008063,GO:0008150,GO:0008152,GO:0008233,GO:0008236,GO:0009566,GO:0009653,GO:0009798,GO:…	-	ko:K09631	DUF1986,Ldl_recept_a,Trypsin
g5689.t1	T	guanylate cyclase activity	-	GO:0003674,GO:0003824,GO:0004383,GO:0005575,GO:0005622,GO:0005623,GO:0005737,GO:0005829,GO:0005886,GO:0005887,GO:0006139,GO:0006163,GO:0006164,GO:0006182,GO:0006725,GO:0006753,GO:0006793,GO:0006796,GO:0006807,GO:0007154,GO:0007165,GO:0008074,GO:0008150,GO:0008152,GO:0009058,GO:0009117,GO:0009150,GO:0009152,GO:0009165,GO:0009187,GO:0009190,GO:0009259,GO:0009260,GO:0009975,GO:0009987,GO:0016020,GO:…	4.6.1.2	ko:K12323,ko:K12324	ANF_receptor,Ank_2,Guanylate_cyc,HNOBA,Pkinase,Pkinase_Tyr
g5742.t1	T	guanylate cyclase activity. It is involved in the biological process described with intracellular signal transduction	-	GO:0003674,GO:0003824,GO:0004383,GO:0005575,GO:0005622,GO:0005623,GO:0005737,GO:0005829,GO:0005886,GO:0005887,GO:0006139,GO:0006163,GO:0006164,GO:0006182,GO:0006725,GO:0006753,GO:0006793,GO:0006796,GO:0006807,GO:0007154,GO:0007165,GO:0008074,GO:0008150,GO:0008152,GO:0009058,GO:0009117,GO:0009150,GO:0009152,GO:0009165,GO:0009187,GO:0009190,GO:0009259,GO:0009260,GO:0009975,GO:0009987,GO:0016020,GO:…	4.6.1.2	ko:K12323,ko:K12324	ANF_receptor,Ank_2,Guanylate_cyc,HNOBA,Pkinase,Pkinase_Tyr
g5742.t2	T	guanylate cyclase activity. It is involved in the biological process described with intracellular signal transduction	-	GO:0003674,GO:0003824,GO:0004383,GO:0005575,GO:0005622,GO:0005623,GO:0005737,GO:0005829,GO:0005886,GO:0005887,GO:0006139,GO:0006163,GO:0006164,GO:0006182,GO:0006725,GO:0006753,GO:0006793,GO:0006796,GO:0006807,GO:0007154,GO:0007165,GO:0008074,GO:0008150,GO:0008152,GO:0009058,GO:0009117,GO:0009150,GO:0009152,GO:0009165,GO:0009187,GO:0009190,GO:0009259,GO:0009260,GO:0009975,GO:0009987,GO:0016020,GO:…	4.6.1.2	ko:K12323,ko:K12324	ANF_receptor,Ank_2,Guanylate_cyc,HNOBA,Pkinase,Pkinase_Tyr
g5810.t1	S	G-protein coupled receptor activity. It is involved in the biological process described with G-protein coupled receptor signaling pathway	GPR139	GO:0001653,GO:0003674,GO:0004888,GO:0004930,GO:0005488,GO:0005515,GO:0005575,GO:0005622,GO:0005623,GO:0005737,GO:0005829,GO:0005886,GO:0005887,GO:0007154,GO:0007165,GO:0007186,GO:0007200,GO:0007218,GO:0008150,GO:0008188,GO:0008528,GO:0009987,GO:0016020,GO:0016021,GO:0023052,GO:0030054,GO:0031224,GO:0031226,GO:0035236,GO:0038023,GO:0044424,GO:0044425,GO:0044444,GO:0044459,GO:0044464,GO:0046983,GO:…	-	ko:K08428,ko:K08430	7TM_GPCR_Srw,7tm_1
g5916.t1	T	guanylate cyclase activity	-	GO:0003674,GO:0003824,GO:0004383,GO:0005575,GO:0005622,GO:0005623,GO:0005737,GO:0005829,GO:0005886,GO:0005887,GO:0006139,GO:0006163,GO:0006164,GO:0006182,GO:0006725,GO:0006753,GO:0006793,GO:0006796,GO:0006807,GO:0007154,GO:0007165,GO:0008074,GO:0008150,GO:0008152,GO:0009058,GO:0009117,GO:0009150,GO:0009152,GO:0009165,GO:0009187,GO:0009190,GO:0009259,GO:0009260,GO:0009975,GO:0009987,GO:0016020,GO:…	4.6.1.2	ko:K12323,ko:K12324	ANF_receptor,Ank_2,Guanylate_cyc,HNOBA,Pkinase,Pkinase_Tyr
g5917.t1	T	It is involved in the biological process described with	-	GO:0003674,GO:0003824,GO:0004383,GO:0005575,GO:0005622,GO:0005623,GO:0005737,GO:0005829,GO:0005886,GO:0005887,GO:0006139,GO:0006163,GO:0006164,GO:0006182,GO:0006725,GO:0006753,GO:0006793,GO:0006796,GO:0006807,GO:0007154,GO:0007165,GO:0008074,GO:0008150,GO:0008152,GO:0009058,GO:0009117,GO:0009150,GO:0009152,GO:0009165,GO:0009187,GO:0009190,GO:0009259,GO:0009260,GO:0009975,GO:0009987,GO:0016020,GO:…	4.6.1.2	ko:K12323,ko:K12324	ANF_receptor,Ank_2,Guanylate_cyc,HNOBA,Pkinase,Pkinase_Tyr
g5921.t1	T	It is involved in the biological process described with	-	GO:0003674,GO:0003824,GO:0004383,GO:0005575,GO:0005622,GO:0005623,GO:0005737,GO:0005829,GO:0005886,GO:0005887,GO:0006139,GO:0006163,GO:0006164,GO:0006182,GO:0006725,GO:0006753,GO:0006793,GO:0006796,GO:0006807,GO:0007154,GO:0007165,GO:0008074,GO:0008150,GO:0008152,GO:0009058,GO:0009117,GO:0009150,GO:0009152,GO:0009165,GO:0009187,GO:0009190,GO:0009259,GO:0009260,GO:0009975,GO:0009987,GO:0016020,GO:…	4.6.1.2	ko:K12323,ko:K12324	ANF_receptor,Ank_2,Guanylate_cyc,HNOBA,Pkinase,Pkinase_Tyr
g5960.t1	O	histone H2A-K119 monoubiquitination	BMI1	GO:0000003,GO:0000122,GO:0000151,GO:0000152,GO:0000785,GO:0000792,GO:0000976,GO:0000977,GO:0000978,GO:0000987,GO:0001012,GO:0001067,GO:0001501,GO:0001558,GO:0001701,GO:0002376,GO:0002520,GO:0002682,GO:0002684,GO:0002694,GO:0002696,GO:0003002,GO:0003006,GO:0003674,GO:0003676,GO:0003677,GO:0003682,GO:0003690,GO:0005488,GO:0005515,GO:0005575,GO:0005622,GO:0005623,GO:0005634,GO:0005654,GO:0005694,GO:…	-	ko:K11459,ko:K14404	COMM_domain,RAWUL,zf-C3HC4,zf-C3HC4_2,zf-CCCH
g5961.t1	I	RNA binding	HDLBP	GO:0000003,GO:0000280,GO:0000322,GO:0000323,GO:0000324,GO:0000329,GO:0000749,GO:0000750,GO:0000785,GO:0000792,GO:0001965,GO:0003674,GO:0003676,GO:0003677,GO:0003690,GO:0003696,GO:0003697,GO:0003723,GO:0003729,GO:0003730,GO:0005488,GO:0005515,GO:0005575,GO:0005622,GO:0005623,GO:0005634,GO:0005694,GO:0005700,GO:0005701,GO:0005737,GO:0005773,GO:0005774,GO:0005783,GO:0005789,GO:0005829,GO:0005844,GO:…	-	-	Collagen,DUF778,KH_1,OLF
g6118.t1	T	Adenylyl- / guanylyl cyclase, catalytic domain	-	GO:0003674,GO:0003824,GO:0004383,GO:0005575,GO:0005622,GO:0005623,GO:0005737,GO:0005829,GO:0005886,GO:0005887,GO:0006139,GO:0006163,GO:0006164,GO:0006182,GO:0006725,GO:0006753,GO:0006793,GO:0006796,GO:0006807,GO:0007154,GO:0007165,GO:0008074,GO:0008150,GO:0008152,GO:0009058,GO:0009117,GO:0009150,GO:0009152,GO:0009165,GO:0009187,GO:0009190,GO:0009259,GO:0009260,GO:0009975,GO:0009987,GO:0016020,GO:…	4.6.1.2	ko:K12323,ko:K12324	ANF_receptor,Ank_2,Guanylate_cyc,HNOBA,Pkinase,Pkinase_Tyr
g6140.t1	B	Tpr domain protein	-	-	-	-	Aminotran_3,SET,TPR_11,TPR_16,TPR_2,TPR_6,TPR_7,TPR_8,p450
g6197.t1	I	ethanolamine kinase activity	ETNK2	GO:0000003,GO:0001666,GO:0001701,GO:0001890,GO:0003006,GO:0003008,GO:0003674,GO:0003824,GO:0004103,GO:0004305,GO:0005575,GO:0005622,GO:0005623,GO:0005634,GO:0005654,GO:0005737,GO:0005829,GO:0005886,GO:0006629,GO:0006644,GO:0006646,GO:0006650,GO:0006656,GO:0006657,GO:0006793,GO:0006796,GO:0006807,GO:0006950,GO:0007275,GO:0007399,GO:0007405,GO:0007417,GO:0007420,GO:0007610,GO:0007611,GO:0007612,GO:…	2.7.1.82	ko:K00894	Choline_kinase,DNA_pol_A_exo1,Methyltransf_11
g6247.t1	L	Gypsy retrotransposon integrase-like protein	GIN1	-	-	-	SCAN,THAP,rve,zf-CCHC,zf-H2C2
g6311.t1	T	Adenylyl- / guanylyl cyclase, catalytic domain	-	-	4.6.1.2	ko:K12323,ko:K12324	ANF_receptor,Guanylate_cyc,Pkinase_Tyr
g6419.t1	T	Heme NO binding associated	-	GO:0003674,GO:0003824,GO:0004383,GO:0005575,GO:0005622,GO:0005623,GO:0005737,GO:0005829,GO:0005886,GO:0005887,GO:0006139,GO:0006163,GO:0006164,GO:0006182,GO:0006725,GO:0006753,GO:0006793,GO:0006796,GO:0006807,GO:0007154,GO:0007165,GO:0008074,GO:0008150,GO:0008152,GO:0009058,GO:0009117,GO:0009150,GO:0009152,GO:0009165,GO:0009187,GO:0009190,GO:0009259,GO:0009260,GO:0009975,GO:0009987,GO:0016020,GO:…	4.6.1.2	ko:K12323,ko:K12324	ANF_receptor,Ank_2,Guanylate_cyc,HNOBA,Pkinase,Pkinase_Tyr
g6452.t1	L	KRAB-A domain containing 2	KRBA2	-	-	-	ABA_GPCR,DDE_Tnp_4,DUF4371,Dimer_Tnp_hAT,KRAB,Myb_DNA-bind_5,RVT_1,THAP,rve
g6489.t1	S	proton channel activity	-	-	-	-	Asp_protease_2,DDE_3,DUF4817,HTH_24,HTH_28,HTH_Tnp_Tc3_1,HTH_Tnp_Tc3_2,MSA-2c,Otopetrin,Retrotrans_gag,WSN,Y_phosphatase
g6563.t1	W	von Willebrand factor (vWF) type A domain	-	-	3.1.3.48	ko:K06238,ko:K16910	CBM_14,PAN_1,VWA
g6711.t1	T	Adenylyl- / guanylyl cyclase, catalytic domain	-	-	4.6.1.2	ko:K12323,ko:K12324	ANF_receptor,Guanylate_cyc,Pkinase_Tyr
g6713.t1	S	DNA- binding	-	-	-	-	Herpes_alk_exo,PIF1,Peptidase_C48,YqaJ
g6729.t1	T	Natriuretic peptide receptor	NPR1	GO:0000166,GO:0001558,GO:0001653,GO:0001882,GO:0001883,GO:0003008,GO:0003013,GO:0003014,GO:0003018,GO:0003674,GO:0003824,GO:0004383,GO:0004888,GO:0004930,GO:0005488,GO:0005515,GO:0005525,GO:0005575,GO:0005622,GO:0005623,GO:0005737,GO:0005829,GO:0005886,GO:0005887,GO:0006139,GO:0006163,GO:0006164,GO:0006182,GO:0006584,GO:0006725,GO:0006753,GO:0006793,GO:0006796,GO:0006807,GO:0006810,GO:0006935,GO:…	4.6.1.2	ko:K12323,ko:K12324,ko:K12325,ko:K13140	ANF_receptor,Dimer_Tnp_hAT,Guanylate_cyc,HNOBA,Ints3,Pkinase,Pkinase_Tyr
g6776.t1	-	-	-	-	-	-	Methyltransf_31,YqaJ
g6809.t1	-	-	-	-	-	-	ALS2CR8,PHD,Peptidase_C48,SWIM
g6976.t1	S	Guanylate-binding protein, N-terminal domain	ATL2	GO:0000137,GO:0000166,GO:0000226,GO:0000902,GO:0000904,GO:0001558,GO:0001882,GO:0001883,GO:0003674,GO:0003824,GO:0003924,GO:0005488,GO:0005515,GO:0005525,GO:0005575,GO:0005622,GO:0005623,GO:0005737,GO:0005783,GO:0005789,GO:0005794,GO:0005795,GO:0006996,GO:0007010,GO:0007017,GO:0007019,GO:0007029,GO:0007030,GO:0007275,GO:0007399,GO:0007409,GO:0007416,GO:0007517,GO:0007528,GO:0008150,GO:0008361,GO:…	-	ko:K17339	Calreticulin,GBP,GBP_C
g7412.t1	T	Olfactory receptor	TRHR	GO:0003674,GO:0004888,GO:0004930,GO:0004997,GO:0005488,GO:0005515,GO:0005575,GO:0005623,GO:0005886,GO:0005887,GO:0006873,GO:0006874,GO:0006875,GO:0007154,GO:0007165,GO:0007186,GO:0007204,GO:0008150,GO:0009986,GO:0009987,GO:0016020,GO:0016021,GO:0019725,GO:0023052,GO:0030003,GO:0031224,GO:0031226,GO:0032092,GO:0038023,GO:0042592,GO:0042802,GO:0042803,GO:0043393,GO:0043496,GO:0044093,GO:0044425,GO:…	-	ko:K04282	7tm_1
g7461.t1	D	Baculoviral IAP repeat-containing	IAP5	GO:0000003,GO:0000022,GO:0000070,GO:0000226,GO:0000278,GO:0000280,GO:0000281,GO:0000775,GO:0000776,GO:0000777,GO:0000779,GO:0000793,GO:0000819,GO:0000910,GO:0000912,GO:0000915,GO:0003674,GO:0003824,GO:0004842,GO:0004857,GO:0004866,GO:0004869,GO:0005488,GO:0005515,GO:0005575,GO:0005622,GO:0005623,GO:0005634,GO:0005694,GO:0005737,GO:0005819,GO:0005856,GO:0005875,GO:0006323,GO:0006325,GO:0006355,GO:…	-	ko:K08731	BIR
g7589.t1	T	guanylate cyclase activity	-	GO:0003674,GO:0003824,GO:0004383,GO:0005575,GO:0005622,GO:0005623,GO:0005737,GO:0005829,GO:0005886,GO:0005887,GO:0006139,GO:0006163,GO:0006164,GO:0006182,GO:0006725,GO:0006753,GO:0006793,GO:0006796,GO:0006807,GO:0007154,GO:0007165,GO:0008074,GO:0008150,GO:0008152,GO:0009058,GO:0009117,GO:0009150,GO:0009152,GO:0009165,GO:0009187,GO:0009190,GO:0009259,GO:0009260,GO:0009975,GO:0009987,GO:0016020,GO:…	4.6.1.2	ko:K12323,ko:K12324	ANF_receptor,Ank_2,Guanylate_cyc,HNOBA,Pkinase,Pkinase_Tyr
g7675.t1	H	Flavin containing amine oxidoreductase	-	GO:0003674,GO:0003824,GO:0005575,GO:0005622,GO:0005623,GO:0005737,GO:0008150,GO:0008152,GO:0016491,GO:0016645,GO:0016647,GO:0040034,GO:0044424,GO:0044464,GO:0048506,GO:0048509,GO:0048510,GO:0050789,GO:0050793,GO:0055114,GO:0065007,GO:1990534	1.5.3.16	ko:K12259	A_deaminase_N,Amino_oxidase,NAD_binding_8,Ribosomal_L29e
g7692.t1	EO	zinc ion binding. It is involved in the biological process described with proteolysis	-	GO:0003674,GO:0003824,GO:0004177,GO:0005488,GO:0005575,GO:0005622,GO:0005623,GO:0005737,GO:0006508,GO:0006518,GO:0006807,GO:0008150,GO:0008152,GO:0008233,GO:0008235,GO:0008237,GO:0008238,GO:0008270,GO:0009056,GO:0009987,GO:0016787,GO:0019538,GO:0033218,GO:0034641,GO:0042277,GO:0043167,GO:0043169,GO:0043170,GO:0043171,GO:0043603,GO:0044237,GO:0044238,GO:0044248,GO:0044424,GO:0044464,GO:0046872,GO:…	3.4.11.2	ko:K11140	DUF773,ERAP1_C,Peptidase_M1,Trypsin
g7890.t1	S	Leukocyte cysteine proteinase inhibitor 1-like	CSTB	GO:0003674,GO:0004857,GO:0004866,GO:0004869,GO:0005575,GO:0005622,GO:0005623,GO:0005737,GO:0005829,GO:0006508,GO:0006807,GO:0006950,GO:0006970,GO:0006972,GO:0008150,GO:0008152,GO:0009628,GO:0009892,GO:0010466,GO:0010605,GO:0010951,GO:0019222,GO:0019538,GO:0030162,GO:0030234,GO:0030414,GO:0031323,GO:0031324,GO:0032268,GO:0032269,GO:0043086,GO:0043170,GO:0044092,GO:0044238,GO:0044424,GO:0044444,GO:…	-	ko:K13907	Cystatin
g8041.t1	Q	Belongs to the cytochrome P450 family	-	GO:0003674,GO:0003824,GO:0004497,GO:0005575,GO:0008150,GO:0008152,GO:0009058,GO:0009719,GO:0009725,GO:0009733,GO:0010033,GO:0016020,GO:0016491,GO:0016705,GO:0016709,GO:0019748,GO:0042221,GO:0044550,GO:0050896,GO:0055114	1.14.14.19,1.14.14.32	ko:K00512,ko:K20770	AAA,p450
g8042.t1	T	Sidekick cell adhesion molecule	PTPRQ	GO:0000902,GO:0000904,GO:0002244,GO:0002376,GO:0002520,GO:0003008,GO:0005575,GO:0005623,GO:0007044,GO:0007275,GO:0007399,GO:0007423,GO:0007600,GO:0007605,GO:0008150,GO:0008544,GO:0009581,GO:0009582,GO:0009605,GO:0009612,GO:0009628,GO:0009653,GO:0009790,GO:0009887,GO:0009888,GO:0009913,GO:0009987,GO:0016043,GO:0022008,GO:0022607,GO:0030054,GO:0030055,GO:0030056,GO:0030097,GO:0030154,GO:0030182,GO:…	2.7.10.1,3.1.3.48	ko:K05120,ko:K16353,ko:K16910	Ig_3,Ion_trans_2,Kringle,Laminin_EGF,Lectin_C,NIDO,PSI,SEA,Sema,Sushi,VWA,Y_phosphatase,fn3
g8199.t1	S	SID1 transmembrane family member	SIDT2	GO:0000323,GO:0000902,GO:0002064,GO:0002065,GO:0002066,GO:0002067,GO:0002068,GO:0002791,GO:0003309,GO:0003323,GO:0003674,GO:0003676,GO:0003723,GO:0003725,GO:0005215,GO:0005488,GO:0005496,GO:0005575,GO:0005622,GO:0005623,GO:0005737,GO:0005764,GO:0005765,GO:0005768,GO:0005773,GO:0005774,GO:0005794,GO:0005886,GO:0006139,GO:0006401,GO:0006403,GO:0006725,GO:0006807,GO:0006810,GO:0006869,GO:0007275,GO:…	-	-	SID-1_RNA_chan
g8262.t1	T	Calcium ion binding	KCNIP4	GO:0000122,GO:0000287,GO:0000976,GO:0001046,GO:0001047,GO:0001067,GO:0001508,GO:0003008,GO:0003012,GO:0003674,GO:0003676,GO:0003677,GO:0003690,GO:0003712,GO:0003714,GO:0005048,GO:0005215,GO:0005216,GO:0005244,GO:0005249,GO:0005250,GO:0005261,GO:0005267,GO:0005488,GO:0005509,GO:0005513,GO:0005515,GO:0005575,GO:0005622,GO:0005623,GO:0005634,GO:0005737,GO:0005829,GO:0005886,GO:0005887,GO:0006355,GO:…	-	ko:K19932	EF-hand_1,EF-hand_5,EF-hand_7,EF-hand_8,Rad60-SLD,YL1
g8404.t1	T	belongs to the protein kinase superfamily	-	GO:0003674,GO:0003824,GO:0004672,GO:0005575,GO:0005622,GO:0005623,GO:0005737,GO:0006464,GO:0006468,GO:0006793,GO:0006796,GO:0006807,GO:0007154,GO:0007165,GO:0008150,GO:0008152,GO:0009987,GO:0016301,GO:0016310,GO:0016740,GO:0016772,GO:0016773,GO:0019538,GO:0023052,GO:0035556,GO:0036211,GO:0043170,GO:0043412,GO:0044237,GO:0044238,GO:0044260,GO:0044267,GO:0044424,GO:0044464,GO:0050789,GO:0050794,GO:…	2.7.11.1,2.7.11.25	ko:K04419,ko:K04424,ko:K04427,ko:K17535	Ank_4,CBM_1,COR,DNA_pol_A,LRR_1,LRR_8,Pkinase,Pkinase_Tyr,Roc,Suc_Fer-like,Usp
g8419.t1	T	positive regulation of endothelial cell chemotaxis	MST1R	GO:0000003,GO:0000122,GO:0000165,GO:0000187,GO:0000902,GO:0000904,GO:0001678,GO:0001725,GO:0001763,GO:0001764,GO:0001817,GO:0001818,GO:0001885,GO:0001886,GO:0001889,GO:0001890,GO:0001932,GO:0001933,GO:0001934,GO:0002009,GO:0002064,GO:0003006,GO:0003008,GO:0003012,GO:0003013,GO:0003015,GO:0003158,GO:0003382,GO:0003674,GO:0003824,GO:0004672,GO:0004713,GO:0004714,GO:0004888,GO:0005008,GO:0005011,GO:…	2.7.10.1	ko:K05088,ko:K05099,ko:K05100,ko:K05119,ko:K08252	Actin,F-actin_cap_A,Gly_rich,Integrin_alpha2,Integrin_beta,Ldl_recept_a,MAM,PSI,Pkinase,Pkinase_Tyr,Sema,TIG,fn3
g8439.t1	S	proton channel activity	-	-	-	-	DDE_3,DUF4817,HTH_24,Otopetrin,PAX,RVT_1,Retrotrans_gag,Y_phosphatase,rve
g8605.t1	S	Sialic acid acetylesterase	SIAE	GO:0000323,GO:0001681,GO:0002682,GO:0003674,GO:0003824,GO:0005575,GO:0005576,GO:0005622,GO:0005623,GO:0005737,GO:0005764,GO:0005773,GO:0005975,GO:0008126,GO:0008150,GO:0008152,GO:0016787,GO:0016788,GO:0034338,GO:0043226,GO:0043227,GO:0043229,GO:0043231,GO:0044238,GO:0044424,GO:0044444,GO:0044464,GO:0050789,GO:0052689,GO:0065007,GO:0071704	3.1.1.53	ko:K05970	SASA
g8798.t1	K	Metal ion binding. It is involved in the biological process described with	TSHZ2	GO:0000122,GO:0000981,GO:0000982,GO:0001078,GO:0001227,GO:0001654,GO:0001655,GO:0001700,GO:0002009,GO:0002165,GO:0003002,GO:0003156,GO:0003674,GO:0003676,GO:0003677,GO:0003682,GO:0003700,GO:0005488,GO:0005515,GO:0005575,GO:0005622,GO:0005623,GO:0005634,GO:0005737,GO:0006355,GO:0006357,GO:0007154,GO:0007165,GO:0007166,GO:0007267,GO:0007275,GO:0007350,GO:0007379,GO:0007380,GO:0007384,GO:0007389,GO:…	-	ko:K09236	zf-C2H2,zf-C2H2_2,zf-C2H2_6,zf-met
g8864.t1	P	STAS domain	SLC26A2	GO:0000003,GO:0001101,GO:0001503,GO:0002376,GO:0002931,GO:0003006,GO:0003008,GO:0003674,GO:0003774,GO:0003824,GO:0005215,GO:0005216,GO:0005253,GO:0005254,GO:0005310,GO:0005342,GO:0005452,GO:0005488,GO:0005515,GO:0005575,GO:0005576,GO:0005615,GO:0005622,GO:0005623,GO:0005737,GO:0005886,GO:0005887,GO:0005902,GO:0005903,GO:0005929,GO:0006082,GO:0006139,GO:0006163,GO:0006164,GO:0006725,GO:0006753,GO:…	-	ko:K14453,ko:K14700,ko:K14701,ko:K14702,ko:K14703,ko:K14704,ko:K14707,ko:K17341	I-set,STAS,Sulfate_transp,TMEM89
g8865.t1	T	phosphorus-oxygen lyase activity. It is involved in the biological process described with	NPR2	GO:0000003,GO:0000166,GO:0001501,GO:0001558,GO:0001653,GO:0001882,GO:0001883,GO:0003008,GO:0003013,GO:0003014,GO:0003018,GO:0003674,GO:0003824,GO:0004383,GO:0004888,GO:0004930,GO:0005488,GO:0005515,GO:0005524,GO:0005525,GO:0005575,GO:0005622,GO:0005623,GO:0005737,GO:0005829,GO:0005886,GO:0005887,GO:0006139,GO:0006163,GO:0006164,GO:0006182,GO:0006584,GO:0006725,GO:0006753,GO:0006793,GO:0006796,GO:…	4.6.1.2	ko:K12323,ko:K12324	ANF_receptor,Dimer_Tnp_hAT,Guanylate_cyc,HNOBA,Pkinase,Pkinase_Tyr
g8866.t1	T	Adenylyl- / guanylyl cyclase, catalytic domain	-	-	-	-	ANF_receptor,Guanylate_cyc,HNOBA,Pkinase_Tyr
g8979.t1	T	Calcium ion binding	LDLRAD3	GO:0000003,GO:0001540,GO:0003006,GO:0003674,GO:0005488,GO:0005575,GO:0005622,GO:0005623,GO:0005737,GO:0005886,GO:0006810,GO:0006897,GO:0006898,GO:0007276,GO:0007281,GO:0007292,GO:0008150,GO:0008196,GO:0009987,GO:0010468,GO:0016020,GO:0016192,GO:0019222,GO:0019953,GO:0022412,GO:0022414,GO:0030135,GO:0030154,GO:0030162,GO:0031410,GO:0031982,GO:0032501,GO:0032502,GO:0032504,GO:0033218,GO:0038024,GO:…	-	ko:K06233	EGF,EGF_CA,FXa_inhibition,Ldl_recept_a,Ldl_recept_b,cEGF
g9350.t1	T	negative regulation of bile acid biosynthetic process	MALRD1	GO:0005575,GO:0005622,GO:0005623,GO:0005737,GO:0005794,GO:0008150,GO:0009889,GO:0009890,GO:0009892,GO:0010565,GO:0010894,GO:0012505,GO:0019216,GO:0019218,GO:0019222,GO:0031323,GO:0031324,GO:0031326,GO:0031327,GO:0042592,GO:0042632,GO:0043226,GO:0043227,GO:0043229,GO:0043231,GO:0044424,GO:0044444,GO:0044464,GO:0045833,GO:0045939,GO:0046890,GO:0048519,GO:0048523,GO:0048878,GO:0050789,GO:0050794,GO:…	-	ko:K22453	DUF316,EGF,I-set,Kringle,Ldl_recept_a,MAM,Ocnus,Pkinase_Tyr,SRCR,Trefoil
g9493.t1	T	guanylate cyclase activity	-	GO:0003674,GO:0003824,GO:0004383,GO:0005575,GO:0005622,GO:0005623,GO:0005737,GO:0005829,GO:0005886,GO:0005887,GO:0006139,GO:0006163,GO:0006164,GO:0006182,GO:0006725,GO:0006753,GO:0006793,GO:0006796,GO:0006807,GO:0007154,GO:0007165,GO:0008074,GO:0008150,GO:0008152,GO:0009058,GO:0009117,GO:0009150,GO:0009152,GO:0009165,GO:0009187,GO:0009190,GO:0009259,GO:0009260,GO:0009975,GO:0009987,GO:0016020,GO:…	4.6.1.2	ko:K12323,ko:K12324	ANF_receptor,Ank_2,Guanylate_cyc,HNOBA,Pkinase,Pkinase_Tyr
g9495.t1	S	PAN domain	-	-	-	-	CBM_1,PAN_1,PAN_4,Ricin_B_lectin,Trypan_PARP,Trypsin_2
g9629.t1	D	Poly(A) RNA polymerase	MTPAP	GO:0000166,GO:0000287,GO:0000956,GO:0000959,GO:0000963,GO:0000965,GO:0001882,GO:0001884,GO:0002134,GO:0003674,GO:0003676,GO:0003723,GO:0003824,GO:0004652,GO:0005488,GO:0005515,GO:0005524,GO:0005575,GO:0005622,GO:0005623,GO:0005737,GO:0005739,GO:0006139,GO:0006378,GO:0006396,GO:0006397,GO:0006401,GO:0006402,GO:0006725,GO:0006807,GO:0008144,GO:0008150,GO:0008152,GO:0008334,GO:0009056,GO:0009057,GO:…	2.7.7.19,2.7.7.52	ko:K13291,ko:K14079,ko:K18060	DSS1_SEM1,GOLGA2L5,NTP_transf_2,PAP_assoc,RRM_1,Thioredoxin
g9977.t1	O	Glutathione S-transferase, N-terminal domain	HPGDS	GO:0000287,GO:0001516,GO:0003674,GO:0003824,GO:0004364,GO:0004667,GO:0005488,GO:0005509,GO:0005515,GO:0005575,GO:0005622,GO:0005623,GO:0005737,GO:0006082,GO:0006629,GO:0006631,GO:0006633,GO:0006636,GO:0006690,GO:0006692,GO:0006693,GO:0008150,GO:0008152,GO:0008285,GO:0008610,GO:0009058,GO:0009987,GO:0016053,GO:0016740,GO:0016765,GO:0016853,GO:0016860,GO:0019752,GO:0032787,GO:0033559,GO:0042127,GO:…	2.5.1.18,5.3.99.2	ko:K00799,ko:K04097	GST_C_3,GST_N
g10076.t1	Q	Glutathione synthetase	GSS	GO:0000166,GO:0000287,GO:0001101,GO:0003674,GO:0003824,GO:0004363,GO:0005488,GO:0005515,GO:0005524,GO:0005575,GO:0005622,GO:0005623,GO:0005737,GO:0005829,GO:0006082,GO:0006518,GO:0006520,GO:0006575,GO:0006749,GO:0006750,GO:0006790,GO:0006807,GO:0006810,GO:0006811,GO:0006820,GO:0006857,GO:0006950,GO:0006974,GO:0006979,GO:0007275,GO:0007399,GO:0007568,GO:0008144,GO:0008150,GO:0008152,GO:0009058,GO:…	3.1.26.5,4.2.2.23,6.3.2.17,6.3.2.3	ko:K01930,ko:K03539,ko:K18195,ko:K21456	CARD,CBM-like,DUF155,DUF3759,DUF4413,GSH_synth_ATP,GSH_synthase,IMD,Mur_ligase_M,Peptidase_C14,RNase_P_p30,Rep_fac_C,fn3_3,polyprenyl_synt
g10122.t1	-	-	-	-	-	-	ALS2CR8,PHD,Peptidase_C48,SWIM
g10403.t1	S	Lecithin retinol acyltransferase	HRASLS2	GO:0003674,GO:0003824,GO:0005575,GO:0005622,GO:0005623,GO:0005737,GO:0005829,GO:0006629,GO:0006644,GO:0006650,GO:0006793,GO:0006796,GO:0006807,GO:0008150,GO:0008152,GO:0009987,GO:0016020,GO:0016740,GO:0016746,GO:0019637,GO:0036152,GO:0044237,GO:0044238,GO:0044255,GO:0044424,GO:0044444,GO:0044464,GO:0046470,GO:0046486,GO:0071704,GO:0097164,GO:1901564	3.1.1.32,3.1.1.4	ko:K16817	LRAT
g10500.t1	T	Atrial natriuretic peptide receptor	NPR1	GO:0000166,GO:0001558,GO:0001653,GO:0001882,GO:0001883,GO:0003008,GO:0003013,GO:0003014,GO:0003018,GO:0003674,GO:0003824,GO:0004383,GO:0004888,GO:0004930,GO:0005488,GO:0005515,GO:0005525,GO:0005575,GO:0005622,GO:0005623,GO:0005737,GO:0005829,GO:0005886,GO:0005887,GO:0006139,GO:0006163,GO:0006164,GO:0006182,GO:0006584,GO:0006725,GO:0006753,GO:0006793,GO:0006796,GO:0006807,GO:0006810,GO:0006935,GO:…	4.6.1.2	ko:K12323,ko:K12324,ko:K12325,ko:K13140	ANF_receptor,Dimer_Tnp_hAT,Guanylate_cyc,HNOBA,Ints3,Pkinase,Pkinase_Tyr
g11165.t1	-	-	-	-	-	-	DUF4218,DUF4806,THAP,Transposase_21
g11230.t1	T	Possible catecholamine-binding domain present in a variety of eukaryotic proteins.	nahoda	-	-	ko:K06568	Cornifin,DOMON,EGF,EGF_2,Fz,LPMO_10,Ldl_recept_a,Reeler,SEA,SRCR,TIL,TonB_N
g11288.t1	T	Rho guanyl-nucleotide exchange factor activity. It is involved in the biological process described with	ARHGEF12	GO:0001505,GO:0001558,GO:0001664,GO:0003008,GO:0003012,GO:0003674,GO:0005085,GO:0005088,GO:0005089,GO:0005102,GO:0005488,GO:0005515,GO:0005575,GO:0005622,GO:0005623,GO:0005737,GO:0005829,GO:0006355,GO:0006936,GO:0006941,GO:0006996,GO:0007010,GO:0007154,GO:0007163,GO:0007165,GO:0007186,GO:0007264,GO:0007265,GO:0007266,GO:0008150,GO:0009889,GO:0009891,GO:0009893,GO:0009966,GO:0009987,GO:0010468,GO:…	-	ko:K07532,ko:K12331	Actin,B9-C2,C1_1,DUF1619,Ets,PDZ,PDZ_2,PH_13,RGS-like,RhoGEF,Ribosomal_S27,ubiquitin
g11372.t1	EJ	ABC transporter	ABCF3	GO:0000166,GO:0001932,GO:0001934,GO:0003674,GO:0003824,GO:0005488,GO:0005515,GO:0005524,GO:0005575,GO:0005622,GO:0005623,GO:0005737,GO:0005829,GO:0005840,GO:0006417,GO:0006448,GO:0008144,GO:0008150,GO:0009889,GO:0009893,GO:0010468,GO:0010556,GO:0010562,GO:0010604,GO:0010608,GO:0010941,GO:0016462,GO:0016787,GO:0016817,GO:0016818,GO:0016887,GO:0017076,GO:0017111,GO:0019220,GO:0019222,GO:0022626,GO:…	-	ko:K06158	ABC_tran,ABC_tran_Xtn,BRICHOS,CIA30,DUF3700,Sugar_tr
g11392.t1	MW	Calcium ion binding. It is involved in the biological process described with cell-matrix adhesion	NID1	GO:0000902,GO:0000904,GO:0001655,GO:0001764,GO:0001822,GO:0003674,GO:0005198,GO:0005201,GO:0005488,GO:0005515,GO:0005518,GO:0005575,GO:0005576,GO:0005604,GO:0005605,GO:0005623,GO:0005886,GO:0006928,GO:0006935,GO:0007154,GO:0007155,GO:0007160,GO:0007267,GO:0007268,GO:0007271,GO:0007275,GO:0007399,GO:0007409,GO:0007411,GO:0008104,GO:0008150,GO:0009605,GO:0009653,GO:0009986,GO:0009987,GO:0010810,GO:…	-	ko:K06826	EGF,EGF_3,EGF_CA,EGF_MSP1_1,FXa_inhibition,G2F,Kunitz_BPTI,Ldl_recept_b,NIDO,NTR,OLF,Thyroglobulin_1,WAP,cEGF,hEGF
g11875.t1	E	K02A2.6-like	-	-	-	-	Asp_protease_2,DDE_Tnp_4,DUF1759,HTH_Tnp_4,PHD,PNMA,RVP_2,RVT_1,SCAN,SRCR,Suppressor_APC,TatD_DNase,Zona_pellucida,gag-asp_proteas,rve,zf-CCHC,zf-H2C2
g12410.t1	S	YqaJ-like viral recombinase domain	-	-	-	-	YqaJ
g12586.t1	P	Solute carrier family 26 member	SLC26A10	GO:0003674,GO:0005215,GO:0005216,GO:0005253,GO:0005254,GO:0005310,GO:0005342,GO:0005452,GO:0005575,GO:0005623,GO:0005886,GO:0005887,GO:0006810,GO:0006811,GO:0006812,GO:0006816,GO:0006820,GO:0006821,GO:0006835,GO:0006855,GO:0006873,GO:0006885,GO:0008028,GO:0008150,GO:0008272,GO:0008324,GO:0008509,GO:0008514,GO:0009987,GO:0015075,GO:0015085,GO:0015103,GO:0015106,GO:0015108,GO:0015116,GO:0015238,GO:…	-	ko:K14453,ko:K14703,ko:K14704,ko:K14707	STAS,Sulfate_transp
g12789.t1	S	lymphoid lineage cell migration into thymus	BCL11A	GO:0000122,GO:0000902,GO:0000904,GO:0000976,GO:0000977,GO:0000978,GO:0000981,GO:0000982,GO:0000987,GO:0001012,GO:0001067,GO:0001077,GO:0001078,GO:0001227,GO:0001228,GO:0001558,GO:0001654,GO:0001775,GO:0002064,GO:0002200,GO:0002376,GO:0002520,GO:0002521,GO:0002562,GO:0002568,GO:0002681,GO:0002791,GO:0002792,GO:0003334,GO:0003382,GO:0003674,GO:0003676,GO:0003677,GO:0003690,GO:0003700,GO:0003712,GO:…	-	ko:K22045,ko:K22046	FAM177,zf-C2H2
g12834.t1	T	Leucine rich repeat containing 43	LRRC43	-	-	-	LRR_6,LRR_8,LRR_9
g13016.t1	S	intraflagellar transport	IFT88	GO:0000003,GO:0000226,GO:0000902,GO:0000904,GO:0001578,GO:0001654,GO:0001655,GO:0001669,GO:0001822,GO:0001885,GO:0001886,GO:0001889,GO:0001944,GO:0002064,GO:0002080,GO:0002081,GO:0002119,GO:0002164,GO:0003002,GO:0003006,GO:0003007,GO:0003008,GO:0003158,GO:0003205,GO:0003206,GO:0003279,GO:0003382,GO:0003674,GO:0005488,GO:0005515,GO:0005575,GO:0005622,GO:0005623,GO:0005737,GO:0005794,GO:0005802,GO:…	-	ko:K16474	ABC2_membrane,Ank_2,CHB_HEX_C_1,Cyt-b5,DUF3808,EGF_2,Ion_trans,Kelch_1,Kelch_4,Kelch_5,MFS_1,MMR_HSR1,MORN,NCA2,NGP1NT,Pkinase_Tyr,SBP_bac_1,TPR_1,TPR_12,TPR_16,TPR_19,TPR_2,TPR_3,TPR_6,TPR_7,TPR_8
g13017.t1	K	Contains two conserved F residues	TCERG1	GO:0000122,GO:0000375,GO:0000377,GO:0000398,GO:0001085,GO:0001103,GO:0003674,GO:0003676,GO:0003700,GO:0003712,GO:0003713,GO:0003714,GO:0003723,GO:0005488,GO:0005515,GO:0005575,GO:0005622,GO:0005623,GO:0005634,GO:0005654,GO:0005681,GO:0005684,GO:0005685,GO:0006139,GO:0006351,GO:0006355,GO:0006357,GO:0006366,GO:0006396,GO:0006397,GO:0006725,GO:0006807,GO:0008134,GO:0008150,GO:0008152,GO:0008380,GO:…	-	ko:K12824	Efg1,FF,GST_C,GST_N,Peroxidase_2,SEA,WW
g13554.t1	-	-	-	-	-	-	Tnp_zf-ribbon_2
g13634.t1	T	Protein kinase domain	SCYL1	GO:0000049,GO:0003674,GO:0003676,GO:0003723,GO:0003824,GO:0004672,GO:0004713,GO:0005488,GO:0005575,GO:0005622,GO:0005623,GO:0005737,GO:0005793,GO:0005794,GO:0005798,GO:0005801,GO:0005815,GO:0005829,GO:0005856,GO:0006403,GO:0006405,GO:0006409,GO:0006464,GO:0006468,GO:0006611,GO:0006793,GO:0006796,GO:0006807,GO:0006810,GO:0006886,GO:0006890,GO:0006913,GO:0008104,GO:0008150,GO:0008152,GO:0009987,GO:…	-	ko:K08876	ATP-synt_ab,ATP-synt_ab_N,ATP-synt_ab_Xtn,BCDHK_Adom3,Cnd1,DUF2462,DUF4203,HEAT,PDZ,PTS_2-RNA,Pkinase,Pkinase_Tyr,adh_short
g13777.t1	T	Animal haem peroxidase	-	-	1.11.1.7	ko:K19511	An_peroxidase,Ank_2,Ank_4,IgGFc_binding,PAN_4
g14055.t1	S	Transcription activator MBF2	-	-	-	-	MBF2
g14075.t1	L	transposition, RNA-mediated	-	-	-	-	Chromo,rve
g14325.t1	-	-	-	-	-	-	RVT_1,RVT_3
g14471.t1	A	Pre-mRNA 3' end processing protein	WDR33	GO:0000003,GO:0000228,GO:0000375,GO:0000377,GO:0000398,GO:0000785,GO:0000790,GO:0001650,GO:0005575,GO:0005622,GO:0005623,GO:0005634,GO:0005654,GO:0005694,GO:0005730,GO:0005847,GO:0005849,GO:0006139,GO:0006259,GO:0006281,GO:0006301,GO:0006351,GO:0006353,GO:0006366,GO:0006369,GO:0006378,GO:0006379,GO:0006396,GO:0006397,GO:0006403,GO:0006405,GO:0006406,GO:0006611,GO:0006725,GO:0006807,GO:0006810,GO:…	-	ko:K13221,ko:K15542	ATP-synt_C,Collagen,PPR,PPR_2,PPR_3,Tmemb_170,WD40,p450
g14500.t1	BD	Tigger transposable	PDC2	GO:0000003,GO:0000070,GO:0000228,GO:0000278,GO:0000280,GO:0000775,GO:0000779,GO:0000780,GO:0000785,GO:0000790,GO:0000792,GO:0000793,GO:0000794,GO:0000819,GO:0000976,GO:0000977,GO:0000978,GO:0000987,GO:0001012,GO:0001067,GO:0003006,GO:0003674,GO:0003676,GO:0003677,GO:0003690,GO:0005488,GO:0005575,GO:0005622,GO:0005623,GO:0005634,GO:0005694,GO:0006109,GO:0006140,GO:0006325,GO:0006342,GO:0006355,GO:…	-	-	CENP-B_N,DDE_1,DDE_Tnp_4,DUF4371,Dimer_Tnp_hAT,HTH_Tnp_Tc5,MADF_DNA_bdg
g14583.t1	T	It is involved in the biological process described with	-	GO:0003674,GO:0003824,GO:0004383,GO:0005575,GO:0005622,GO:0005623,GO:0005737,GO:0005829,GO:0005886,GO:0005887,GO:0006139,GO:0006163,GO:0006164,GO:0006182,GO:0006725,GO:0006753,GO:0006793,GO:0006796,GO:0006807,GO:0007154,GO:0007165,GO:0008074,GO:0008150,GO:0008152,GO:0009058,GO:0009117,GO:0009150,GO:0009152,GO:0009165,GO:0009187,GO:0009190,GO:0009259,GO:0009260,GO:0009975,GO:0009987,GO:0016020,GO:…	4.6.1.2	ko:K12323,ko:K12324	ANF_receptor,Ank_2,Guanylate_cyc,HNOBA,Pkinase,Pkinase_Tyr
g14616.t1	T	guanylate cyclase activity	NPR2	GO:0000003,GO:0000166,GO:0001501,GO:0001558,GO:0001653,GO:0001882,GO:0001883,GO:0003008,GO:0003013,GO:0003014,GO:0003018,GO:0003674,GO:0003824,GO:0004383,GO:0004888,GO:0004930,GO:0005488,GO:0005515,GO:0005524,GO:0005525,GO:0005575,GO:0005622,GO:0005623,GO:0005737,GO:0005829,GO:0005886,GO:0005887,GO:0006139,GO:0006163,GO:0006164,GO:0006182,GO:0006584,GO:0006725,GO:0006753,GO:0006793,GO:0006796,GO:…	4.6.1.2	ko:K12323,ko:K12324	ANF_receptor,Dimer_Tnp_hAT,Guanylate_cyc,HNOBA,Pkinase,Pkinase_Tyr
g14662.t1	-	-	-	-	-	-	7TM_GPCR_Srw,DNA_pol_B_2
g15370.t1	S	oxidation-reduction process	-	-	-	-	Exo_endo_phos_2,Herpes_teg_N
g15391.t1	-	-	-	-	-	-	7TM_GPCR_Srw,DNA_pol_B_2
g15726.t1	S	DNA polymerase type B, organellar and viral	-	-	-	-	7TM_GPCR_Srw,DNA_pol_B_2,Rho_N
g15744.t1	L	transposition, RNA-mediated	-	-	-	-	Asp_protease,Asp_protease_2,RVP_2,RVT_1,Retrotrans_gag,rve
g16.t1	E	dopamine beta-monooxygenase activity	MOXD1	GO:0001505,GO:0003674,GO:0003824,GO:0004497,GO:0004500,GO:0005488,GO:0005507,GO:0005575,GO:0005576,GO:0005615,GO:0005622,GO:0005623,GO:0005737,GO:0005783,GO:0005789,GO:0006066,GO:0006576,GO:0006584,GO:0006589,GO:0006725,GO:0006807,GO:0008150,GO:0008152,GO:0009056,GO:0009058,GO:0009308,GO:0009309,GO:0009712,GO:0009713,GO:0009987,GO:0012505,GO:0012506,GO:0016020,GO:0016491,GO:0016705,GO:0016715,GO:…	1.14.17.1	ko:K00503	Clat_adaptor_s,Cu2_monoox_C,Cu2_monooxygen,DOMON
g222.t1	-	-	-	-	-	-	7TM_GPCR_Srw,DNA_pol_B_2
g242.t1	L	Integrase core domain	-	-	-	-	Baculo_F,Chromo,Pkinase,rve
g399.t1	KO	base-excision repair	HUWE1	GO:0000209,GO:0000278,GO:0000447,GO:0000448,GO:0000460,GO:0000462,GO:0000463,GO:0000466,GO:0000469,GO:0000470,GO:0000472,GO:0000478,GO:0000479,GO:0000480,GO:0000966,GO:0000967,GO:0001709,GO:0001775,GO:0002252,GO:0002263,GO:0002274,GO:0002275,GO:0002283,GO:0002366,GO:0002376,GO:0002443,GO:0002444,GO:0002446,GO:0003674,GO:0003676,GO:0003677,GO:0003824,GO:0004842,GO:0005488,GO:0005515,GO:0005575,GO:…	2.3.2.26	ko:K10592	DUF4414,DUF908,DUF913,HECT,Kri1,Pribosyl_synth,Pribosyltran_N,UBA,UDPGT,WWE
g530.t1	-	-	-	-	-	-	7TM_GPCR_Srw,DNA_pol_B_2,Rho_N
g700.t1	E	K02A2.6-like	-	-	-	-	Asp_protease_2,HMGL-like,PNMA,RVP,RVT_1,Retrotrans_gag,SCAN,V-set,gag-asp_proteas,rve,zf-CCHC,zf-H2C2
g13583.t1	J	ATP binding. It is involved in the biological process described with threonyl-tRNA aminoacylation	TARS	GO:0000049,GO:0000166,GO:0003674,GO:0003676,GO:0003723,GO:0003746,GO:0003824,GO:0004812,GO:0004817,GO:0004829,GO:0005488,GO:0005515,GO:0005524,GO:0005575,GO:0005622,GO:0005623,GO:0005737,GO:0005739,GO:0005829,GO:0005853,GO:0005856,GO:0006082,GO:0006139,GO:0006399,GO:0006412,GO:0006414,GO:0006418,GO:0006423,GO:0006435,GO:0006518,GO:0006520,GO:0006725,GO:0006807,GO:0007275,GO:0007568,GO:0008135,GO:…	6.1.1.1,6.1.1.11,6.1.1.16,6.1.1.3	ko:K01866,ko:K01868,ko:K01875,ko:K01883,ko:K03232,ko:K15410	Aa_trans,DUF2431,DUF4615,EF-1_beta_acid,EF1_GNE,HGTP_anticodon,LRR_4,Ribosomal_60s,Seryl_tRNA_N,TGS,Y_phosphatase,tRNA-synt_1b,tRNA-synt_1e,tRNA-synt_2,tRNA-synt_2b,tRNA_SAD,tRNA_anti-codon,tRNA_bind
g13584.t1	J	ribosomal protein S11	MRPS11	GO:0000028,GO:0000313,GO:0000314,GO:0000462,GO:0003674,GO:0003676,GO:0003723,GO:0003729,GO:0003735,GO:0005198,GO:0005488,GO:0005575,GO:0005622,GO:0005623,GO:0005737,GO:0005739,GO:0005740,GO:0005743,GO:0005759,GO:0005761,GO:0005763,GO:0005840,GO:0006139,GO:0006364,GO:0006396,GO:0006412,GO:0006414,GO:0006415,GO:0006518,GO:0006725,GO:0006807,GO:0006950,GO:0006974,GO:0006996,GO:0008150,GO:0008152,GO:…	-	ko:K02948	Ribosomal_L18p,Ribosomal_L27A,Ribosomal_L6,Ribosomal_S11,Ribosomal_S13,Ribosomal_S4,Ribosomal_S5,Ribosomal_S5_C,S4,SecY
g13585.t1	S	Mitochondrial 28S ribosomal protein S27	MRPS27	GO:0000049,GO:0000313,GO:0000314,GO:0003674,GO:0003676,GO:0003723,GO:0005488,GO:0005575,GO:0005622,GO:0005623,GO:0005737,GO:0005739,GO:0005740,GO:0005743,GO:0005759,GO:0005761,GO:0005763,GO:0005840,GO:0006412,GO:0006414,GO:0006415,GO:0006417,GO:0006518,GO:0006807,GO:0008150,GO:0008152,GO:0008283,GO:0009058,GO:0009059,GO:0009889,GO:0009891,GO:0009893,GO:0009987,GO:0010467,GO:0010468,GO:0010556,GO:…	-	ko:K17406	MRP-S27
g13586.t1	J	ribosomal protein, L54	MRPL54	GO:0000313,GO:0000315,GO:0003674,GO:0003735,GO:0005198,GO:0005575,GO:0005622,GO:0005623,GO:0005737,GO:0005739,GO:0005740,GO:0005743,GO:0005759,GO:0005761,GO:0005762,GO:0005840,GO:0006412,GO:0006414,GO:0006415,GO:0006518,GO:0006807,GO:0008150,GO:0008152,GO:0009058,GO:0009059,GO:0009987,GO:0010467,GO:0015934,GO:0016020,GO:0016043,GO:0019538,GO:0019866,GO:0022411,GO:0031090,GO:0031966,GO:0031967,GO:…	-	ko:K17435	Ank_2,BCDHK_Adom3,HATPase_c,RRM_1,Ribosomal_L37,TIG
g13587.t1	S	intraciliary transport	IFT27	GO:0000166,GO:0001882,GO:0001883,GO:0003674,GO:0003824,GO:0003924,GO:0005488,GO:0005525,GO:0005575,GO:0005622,GO:0005623,GO:0005737,GO:0005768,GO:0005794,GO:0005813,GO:0005815,GO:0005856,GO:0005929,GO:0006810,GO:0006886,GO:0006928,GO:0006996,GO:0007017,GO:0007018,GO:0007154,GO:0007165,GO:0007166,GO:0007224,GO:0007264,GO:0007275,GO:0007399,GO:0007423,GO:0008104,GO:0008150,GO:0009987,GO:0010970,GO:…	-	ko:K07934	Ras,Transmemb_17
g13588.t1	T	Calcineurin subunit B type	PPP3R1	GO:0000003,GO:0000749,GO:0000754,GO:0001505,GO:0001525,GO:0001568,GO:0001569,GO:0001763,GO:0001837,GO:0001944,GO:0002009,GO:0002682,GO:0002764,GO:0002768,GO:0003674,GO:0003824,GO:0004721,GO:0004722,GO:0004723,GO:0005488,GO:0005509,GO:0005515,GO:0005516,GO:0005575,GO:0005622,GO:0005623,GO:0005634,GO:0005654,GO:0005737,GO:0005829,GO:0005886,GO:0005955,GO:0005975,GO:0005976,GO:0005977,GO:0006073,GO:…	-	ko:K06268	CNRIP1,Cnd2,Diphthamide_syn,EF-hand_1,EF-hand_5,EF-hand_6,EF-hand_7,EF-hand_8,Pkinase,WD40
g13589.t1	K	methylated histone binding	HP1A	GO:0000182,GO:0000228,GO:0000278,GO:0000723,GO:0000775,GO:0000779,GO:0000780,GO:0000781,GO:0000785,GO:0000790,GO:0000791,GO:0000792,GO:0000793,GO:0000794,GO:0001672,GO:0003674,GO:0003676,GO:0003677,GO:0003682,GO:0003690,GO:0003696,GO:0003723,GO:0003729,GO:0005488,GO:0005515,GO:0005575,GO:0005622,GO:0005623,GO:0005634,GO:0005694,GO:0005700,GO:0005701,GO:0005703,GO:0005704,GO:0005720,GO:0005721,GO:…	-	ko:K11585,ko:K11586,ko:K11587	Chromo,Chromo_shadow
g13590.t1	P	Calcium-activated BK potassium channel alpha subunit	KCNMA1	GO:0000003,GO:0001505,GO:0001508,GO:0001666,GO:0002065,GO:0003008,GO:0003012,GO:0003013,GO:0003014,GO:0003018,GO:0003674,GO:0003779,GO:0005215,GO:0005216,GO:0005227,GO:0005244,GO:0005249,GO:0005261,GO:0005267,GO:0005488,GO:0005515,GO:0005575,GO:0005576,GO:0005615,GO:0005622,GO:0005623,GO:0005737,GO:0005783,GO:0005886,GO:0005887,GO:0005901,GO:0006810,GO:0006811,GO:0006812,GO:0006813,GO:0006873,GO:…	-	ko:K04936,ko:K05274	BK_channel_a,Ion_trans,Ion_trans_2,KA1,Pkinase,Ribosomal_60s,TrkA_N
g13591.t1	E	It is involved in the biological process described with transmembrane transport	SLC12A9	GO:0000002,GO:0000313,GO:0000315,GO:0000322,GO:0000323,GO:0000324,GO:0000329,GO:0003333,GO:0003674,GO:0003735,GO:0005198,GO:0005215,GO:0005342,GO:0005575,GO:0005622,GO:0005623,GO:0005737,GO:0005739,GO:0005740,GO:0005743,GO:0005759,GO:0005761,GO:0005762,GO:0005773,GO:0005774,GO:0005840,GO:0005886,GO:0006412,GO:0006414,GO:0006415,GO:0006518,GO:0006807,GO:0006810,GO:0006811,GO:0006812,GO:0006813,GO:…	3.1.3.16,6.1.1.3	ko:K01868,ko:K09611,ko:K12792,ko:K14429,ko:K17420,ko:K20827	AA_permease,AA_permease_2,Ank_4,Dpy-30,Inhibitor_I9,PAP2_C,PPR,Peptidase_M17,Peptidase_S8,RPAP2_Rtr1,SLC12,SLT,Sulfatase,T-box,TGS,tRNA-synt_2b,tRNA_SAD
g13592.t1	J	mRNA cap-binding component of the eukaryotic translation initiation factor 3 (eIF-3) complex, which is involved in protein synthesis of a specialized repertoire of mRNAs and, together with other initiation factors, stimulates binding of mRNA and methionyl-tRNAi to the 40S ribosome. The eIF-3 complex specifically targets and initiates translation of a subset of mRNAs involved in cell proliferation…	EIF3D	GO:0000339,GO:0001732,GO:0002181,GO:0002183,GO:0002191,GO:0003674,GO:0003676,GO:0003723,GO:0003729,GO:0003743,GO:0003824,GO:0004721,GO:0004722,GO:0005488,GO:0005515,GO:0005575,GO:0005622,GO:0005623,GO:0005634,GO:0005635,GO:0005654,GO:0005737,GO:0005783,GO:0005789,GO:0005813,GO:0005815,GO:0005829,GO:0005852,GO:0005856,GO:0005911,GO:0006412,GO:0006413,GO:0006417,GO:0006446,GO:0006464,GO:0006470,GO:…	-	ko:K02987,ko:K03251,ko:K10136	40S_S4_C,DRMBL,Endosulfine,FAD_binding_3,HECT_2,Lactamase_B_2,Metallophos,Methyltransf_16,Myosin_head,PMP22_Claudin,PPP5,Patatin,Peptidase_S28,RS4NT,Ribosomal_S4e,Snf7,TPR_1,TPR_8,WCOR413,dCMP_cyt_deam_1,eIF-3_zeta
g13594.t1	O	DnaJ (Hsp40) homolog, subfamily C, member 11	DNAJC11	GO:0000003,GO:0001671,GO:0003006,GO:0003674,GO:0005575,GO:0005622,GO:0005623,GO:0005634,GO:0005737,GO:0005739,GO:0005740,GO:0005741,GO:0006605,GO:0006626,GO:0006810,GO:0006839,GO:0006886,GO:0006996,GO:0007005,GO:0007006,GO:0007007,GO:0007275,GO:0008047,GO:0008104,GO:0008150,GO:0009314,GO:0009416,GO:0009536,GO:0009628,GO:0009642,GO:0009791,GO:0009987,GO:0010228,GO:0015031,GO:0015833,GO:0016020,GO:…	-	ko:K03575,ko:K09531	DUF3395,DnaJ,HhH-GPD
g13595.t1	S	2, light intermediate chain 1	DYNC2LI1	GO:0003674,GO:0005488,GO:0005515,GO:0005575,GO:0005622,GO:0005623,GO:0005737,GO:0005813,GO:0005815,GO:0005856,GO:0005868,GO:0005875,GO:0005929,GO:0005930,GO:0006810,GO:0006928,GO:0006996,GO:0007017,GO:0007018,GO:0007275,GO:0007368,GO:0007389,GO:0008150,GO:0009799,GO:0009855,GO:0009987,GO:0010970,GO:0015630,GO:0016043,GO:0022607,GO:0030030,GO:0030031,GO:0030286,GO:0030705,GO:0030990,GO:0031344,GO:…	-	ko:K10417	DLIC,FERM_M,Longin,Proteasome,Ras,Roc,Synaptobrevin
g13600.t1	O	ring-box protein	RBX1	GO:0000003,GO:0000082,GO:0000151,GO:0000152,GO:0000278,GO:0000280,GO:0000578,GO:0000819,GO:0003002,GO:0003674,GO:0003824,GO:0004842,GO:0005488,GO:0005515,GO:0005575,GO:0005622,GO:0005623,GO:0005634,GO:0005654,GO:0005737,GO:0006464,GO:0006508,GO:0006511,GO:0006807,GO:0006928,GO:0006996,GO:0007017,GO:0007018,GO:0007049,GO:0007059,GO:0007135,GO:0007154,GO:0007165,GO:0007166,GO:0007224,GO:0007275,GO:…	2.3.2.32	ko:K03868	zf-ANAPC11,zf-rbx1
g13601.t1	F	Adenosine deaminase	-	-	3.5.4.4	ko:K01488	A_deaminase,PseudoU_synth_2
g13602.t1	F	Carbamoyl-phosphate synthetase 2, aspartate transcarbamylase, and dihydroorotase	CAD	GO:0000050,GO:0000052,GO:0000166,GO:0001882,GO:0001884,GO:0002119,GO:0002134,GO:0002164,GO:0003674,GO:0003824,GO:0004070,GO:0004087,GO:0004088,GO:0004151,GO:0004672,GO:0005488,GO:0005515,GO:0005524,GO:0005575,GO:0005622,GO:0005623,GO:0005634,GO:0005654,GO:0005737,GO:0005739,GO:0005829,GO:0006082,GO:0006139,GO:0006206,GO:0006207,GO:0006213,GO:0006220,GO:0006221,GO:0006228,GO:0006464,GO:0006468,GO:…	2.1.3.2,3.5.2.3,6.3.5.5	ko:K11540	Amidohydro_1,BetaGal_dom4_5,CPSase_L_D2,CPSase_L_D3,CPSase_sm_chain,GATase,Glyco_hydro_35,MGS,OTCace,OTCace_N
g13603.t1	S	identical protein binding	UHRF1BP1L	GO:0003674,GO:0005488,GO:0005515,GO:0005575,GO:0005622,GO:0005623,GO:0005737,GO:0005768,GO:0005769,GO:0005829,GO:0012505,GO:0019899,GO:0031410,GO:0031982,GO:0042802,GO:0042803,GO:0042826,GO:0043226,GO:0043227,GO:0043229,GO:0044424,GO:0044444,GO:0044464,GO:0046983,GO:0097708	-	-	Chorein_N,Ferritin,Neur_chan_LBD,PPR,PPR_2,SAP18,SHR-BD,TAXi_C,VPS13,VPS13_C
g13603.t2	S	identical protein binding	UHRF1BP1L	GO:0003674,GO:0005488,GO:0005515,GO:0005575,GO:0005622,GO:0005623,GO:0005737,GO:0005768,GO:0005769,GO:0005829,GO:0012505,GO:0019899,GO:0031410,GO:0031982,GO:0042802,GO:0042803,GO:0042826,GO:0043226,GO:0043227,GO:0043229,GO:0044424,GO:0044444,GO:0044464,GO:0046983,GO:0097708	-	-	Chorein_N,Ferritin,Neur_chan_LBD,PPR,PPR_2,SAP18,SHR-BD,TAXi_C,VPS13,VPS13_C
g13604.t1	S	gamma-secretase subunit	PSENEN	GO:0000003,GO:0001667,GO:0003006,GO:0005575,GO:0005622,GO:0005623,GO:0005737,GO:0005768,GO:0005770,GO:0005783,GO:0005794,GO:0005798,GO:0005886,GO:0005887,GO:0006508,GO:0006509,GO:0006518,GO:0006807,GO:0006928,GO:0007154,GO:0007165,GO:0007166,GO:0007219,GO:0007220,GO:0007275,GO:0007276,GO:0007281,GO:0008150,GO:0008152,GO:0009653,GO:0009790,GO:0009792,GO:0009987,GO:0010467,GO:0010631,GO:0010941,GO:…	-	ko:K02701,ko:K06170,ko:K15356	PEN-2,PIG-S,PsaN,TPT
g13605.t1	U	vesicle docking involved in exocytosis	EXOC6B	GO:0000003,GO:0000131,GO:0000145,GO:0000902,GO:0000904,GO:0001505,GO:0001667,GO:0002064,GO:0002065,GO:0002066,GO:0003006,GO:0003674,GO:0005488,GO:0005515,GO:0005575,GO:0005576,GO:0005615,GO:0005622,GO:0005623,GO:0005628,GO:0005737,GO:0005768,GO:0005829,GO:0005886,GO:0005911,GO:0005933,GO:0005934,GO:0005935,GO:0005937,GO:0005938,GO:0006810,GO:0006836,GO:0006886,GO:0006887,GO:0006892,GO:0006893,GO:…	-	ko:K19985	COG2,COG5,CtaG_Cox11,HSP70,Phosphodiest,Sec15,Sec8_exocyst,Vps51
g13607.t1	H	Atg12 activating enzyme activity	ATG7	GO:0000003,GO:0000045,GO:0000302,GO:0000407,GO:0000422,GO:0000902,GO:0000904,GO:0001101,GO:0001775,GO:0001889,GO:0002119,GO:0002164,GO:0002165,GO:0002252,GO:0002263,GO:0002274,GO:0002275,GO:0002283,GO:0002366,GO:0002376,GO:0002443,GO:0002444,GO:0002446,GO:0002682,GO:0002697,GO:0002791,GO:0002793,GO:0002831,GO:0003006,GO:0003008,GO:0003674,GO:0003824,GO:0004839,GO:0005488,GO:0005515,GO:0005575,GO:…	3.5.4.12,3.6.4.13	ko:K01493,ko:K08337,ko:K13117	ATG7_N,DEAD,DUF2462,Glyco_hydro_12,HA2,Helicase_C,MNR,ThiF,dCMP_cyt_deam_1,mRNA_cap_C,mRNA_cap_enzyme
g13608.t1	T	RNA polymerase II CTD heptapeptide repeat kinase activity	CDK1	GO:0000003,GO:0000075,GO:0000077,GO:0000082,GO:0000086,GO:0000187,GO:0000226,GO:0000278,GO:0000280,GO:0000302,GO:0000307,GO:0000578,GO:0000724,GO:0000725,GO:0000741,GO:0001556,GO:0001932,GO:0001934,GO:0002064,GO:0002065,GO:0002066,GO:0002082,GO:0003002,GO:0003006,GO:0003674,GO:0003682,GO:0003824,GO:0004672,GO:0004674,GO:0004693,GO:0005488,GO:0005515,GO:0005575,GO:0005622,GO:0005623,GO:0005634,GO:…	2.7.11.22,2.7.11.23	ko:K02087,ko:K15595,ko:K15596	Pkinase
g13609.t1	K	SRY (sex determining region Y)-box	SOX9	GO:0000003,GO:0000122,GO:0000165,GO:0000976,GO:0000977,GO:0000978,GO:0000981,GO:0000982,GO:0000987,GO:0001012,GO:0001046,GO:0001047,GO:0001067,GO:0001077,GO:0001101,GO:0001158,GO:0001228,GO:0001501,GO:0001502,GO:0001503,GO:0001654,GO:0001655,GO:0001656,GO:0001657,GO:0001658,GO:0001667,GO:0001708,GO:0001754,GO:0001755,GO:0001763,GO:0001822,GO:0001823,GO:0001837,GO:0001838,GO:0001889,GO:0001894,GO:…	-	ko:K09270,ko:K18435	HMG_box,Sox_N
g13610.t1	S	tetratricopeptide repeat	TTC27	GO:0005575,GO:0005622,GO:0005623,GO:0005634,GO:0005737,GO:0008150,GO:0009987,GO:0016043,GO:0031505,GO:0032991,GO:0043226,GO:0043227,GO:0043229,GO:0043231,GO:0044424,GO:0044464,GO:0045229,GO:0071554,GO:0071555,GO:0071840,GO:0071852	-	-	GYF,NUDIX,PPR,TBP,TPR_1,TPR_11,TPR_15,TPR_16,TPR_17,TPR_19,TPR_2,TPR_7,TPR_8,adh_short_C2
g13611.t1	S	CWC25 spliceosome-associated protein homolog (S. cerevisiae)	CWC25	GO:0000003,GO:0000375,GO:0000377,GO:0000398,GO:0003006,GO:0003674,GO:0005488,GO:0005515,GO:0005575,GO:0005622,GO:0005623,GO:0005634,GO:0005654,GO:0005681,GO:0005684,GO:0006139,GO:0006396,GO:0006397,GO:0006725,GO:0006807,GO:0007049,GO:0007275,GO:0007530,GO:0008150,GO:0008152,GO:0008380,GO:0009987,GO:0010467,GO:0016070,GO:0016071,GO:0016604,GO:0016607,GO:0018992,GO:0022414,GO:0031974,GO:0031981,GO:…	2.7.11.1	ko:K07203,ko:K12182	BRO1,CWC25,Cir_N,DUF3385,DnaJ,FAT,FATC,FRB_dom,FYVE,HR1,PI3_PI4_kinase,SH3_1,SH3_9,TPR_16,TPR_2,TPR_8,VHS
g13612.t1	J	Belongs to the class-I aminoacyl-tRNA synthetase family	EARS2	GO:0000959,GO:0003674,GO:0003824,GO:0004812,GO:0004818,GO:0005575,GO:0005622,GO:0005623,GO:0005737,GO:0005739,GO:0006082,GO:0006139,GO:0006399,GO:0006412,GO:0006418,GO:0006424,GO:0006518,GO:0006520,GO:0006725,GO:0006807,GO:0008150,GO:0008152,GO:0009058,GO:0009059,GO:0009987,GO:0010467,GO:0016070,GO:0016874,GO:0016875,GO:0019538,GO:0019752,GO:0032543,GO:0034641,GO:0034645,GO:0034660,GO:0043038,GO:…	6.1.1.17,6.1.1.24	ko:K01885,ko:K09698,ko:K18752	Glyco_transf_92,HEAT_EZ,tRNA-synt_1c
g13613.t1	BD	meiotic chromosome condensation	NCAPD2	GO:0000003,GO:0000018,GO:0000070,GO:0000228,GO:0000278,GO:0000280,GO:0000775,GO:0000776,GO:0000777,GO:0000778,GO:0000779,GO:0000780,GO:0000785,GO:0000793,GO:0000794,GO:0000796,GO:0000797,GO:0000799,GO:0000803,GO:0000805,GO:0000819,GO:0003674,GO:0003682,GO:0005488,GO:0005515,GO:0005575,GO:0005622,GO:0005623,GO:0005634,GO:0005654,GO:0005694,GO:0005730,GO:0005737,GO:0005829,GO:0006139,GO:0006259,GO:…	-	ko:K06677	Amino_oxidase,Asparaginase_2,Bac_rhamnosid_C,Cnd1,Cnd1_N,Cohesin_HEAT,NUDIX,PK,PK_C,Prothymosin,rve,zf-C2H2_2,zf-C2H2_jaz
g13614.t1	DL	Hus1-like protein	HUS1	GO:0000003,GO:0000075,GO:0000076,GO:0000077,GO:0000228,GO:0000278,GO:0000723,GO:0000724,GO:0000725,GO:0000785,GO:0000790,GO:0000792,GO:0000793,GO:0000794,GO:0001932,GO:0003006,GO:0003674,GO:0005488,GO:0005515,GO:0005575,GO:0005622,GO:0005623,GO:0005634,GO:0005654,GO:0005694,GO:0005737,GO:0006139,GO:0006259,GO:0006275,GO:0006281,GO:0006289,GO:0006302,GO:0006310,GO:0006464,GO:0006468,GO:0006725,GO:…	-	ko:K02870,ko:K10903,ko:K10996	Ank_2,Cyclin_C_2,Cyclin_N,Hexokinase_1,Hexokinase_2,Hus1,PTCB-BRCT,Ribosomal_L10,Ribosomal_L11,Ribosomal_L11_N,SET,Yae1_N,zf-C3HC4,zf-RING_2
g13616.t1	S	Ribonuclease H protein	-	-	-	-	DUF1891,IFT57,PCM1_C,RVT_1,SRCR
g13618.t1	A	RNA binding motif protein 19	RBM19	GO:0000003,GO:0000028,GO:0000447,GO:0000460,GO:0000462,GO:0000466,GO:0000469,GO:0000472,GO:0000478,GO:0000479,GO:0000480,GO:0000966,GO:0000967,GO:0002119,GO:0002164,GO:0003006,GO:0003674,GO:0003676,GO:0003723,GO:0003729,GO:0003824,GO:0004386,GO:0005488,GO:0005575,GO:0005622,GO:0005623,GO:0005634,GO:0005654,GO:0005694,GO:0005730,GO:0005737,GO:0006139,GO:0006364,GO:0006396,GO:0006725,GO:0006807,GO:…	-	ko:K09448,ko:K14787	Cyclin_N,DUF3715,DUF4743,EGF,NUDIX,RRM_1,RRM_5,TEA
g13619.t1	A	RNA recognition motif. (a.k.a. RRM, RBD, or RNP domain)	RBM19	GO:0000003,GO:0000028,GO:0000447,GO:0000460,GO:0000462,GO:0000466,GO:0000469,GO:0000472,GO:0000478,GO:0000479,GO:0000480,GO:0000966,GO:0000967,GO:0002119,GO:0002164,GO:0003006,GO:0003674,GO:0003676,GO:0003723,GO:0003729,GO:0003824,GO:0004386,GO:0005488,GO:0005575,GO:0005622,GO:0005623,GO:0005634,GO:0005654,GO:0005694,GO:0005730,GO:0005737,GO:0006139,GO:0006364,GO:0006396,GO:0006725,GO:0006807,GO:…	-	ko:K09448,ko:K14787	Cyclin_N,DUF3715,DUF4743,EGF,NUDIX,RRM_1,RRM_5,TEA
g13620.t1	C	Catalyzes the hydroxylation of L-kynurenine (L-Kyn) to form 3-hydroxy-L-kynurenine (L-3OHKyn). Required for synthesis of quinolinic acid, a neurotoxic NMDA receptor antagonist and potential endogenous inhibitor of NMDA receptor signaling in axonal targeting, synaptogenesis and apoptosis during brain development. Quinolinic acid may also affect NMDA receptor signaling in pancreatic beta cells, ost…	BNA4	GO:0000166,GO:0001505,GO:0001655,GO:0001822,GO:0001878,GO:0001956,GO:0002064,GO:0002237,GO:0003674,GO:0003824,GO:0004497,GO:0004502,GO:0005488,GO:0005575,GO:0005622,GO:0005623,GO:0005737,GO:0005739,GO:0005740,GO:0005741,GO:0005829,GO:0005886,GO:0006082,GO:0006139,GO:0006520,GO:0006568,GO:0006569,GO:0006576,GO:0006586,GO:0006725,GO:0006726,GO:0006727,GO:0006732,GO:0006733,GO:0006753,GO:0006793,GO:…	1.14.13.9	ko:K00486,ko:K19751	3HCDH_N,COG2,CorA,DAO,FAD_binding_3,NAD_binding_8,PIH1,Pyr_redox,Pyr_redox_2
g13620.t2	O	RING-H2 zinc finger domain	-	-	-	-	PX,zf-RING_2,zf-rbx1
g13621.t1	A	Serine arginine-rich splicing factor	SRSF3	-	-	ko:K12892,ko:K12896	RRM_1,zf-CCHC
g13622.t1	B	MYND finger	LY75	GO:0003674,GO:0005488,GO:0008270,GO:0043167,GO:0043169,GO:0046872,GO:0046914	-	ko:K11426,ko:K17495	CX,EGF,Ephrin_rec_like,Fibrinogen_C,Lectin_C,SET,Sushi,TPR_12,VWA,fn2,zf-MYND
g13623.t1	H	protoheme IX farnesyltransferase activity	COX10	GO:0000266,GO:0003674,GO:0003676,GO:0003723,GO:0003824,GO:0004311,GO:0004518,GO:0004519,GO:0004659,GO:0005488,GO:0005575,GO:0005622,GO:0005623,GO:0005634,GO:0005730,GO:0005737,GO:0005739,GO:0005740,GO:0005743,GO:0005829,GO:0006091,GO:0006119,GO:0006123,GO:0006139,GO:0006163,GO:0006464,GO:0006725,GO:0006753,GO:0006778,GO:0006779,GO:0006783,GO:0006784,GO:0006793,GO:0006796,GO:0006807,GO:0006996,GO:…	2.5.1.141	ko:K02257,ko:K09008,ko:K22072	ABC_membrane,ABC_tran,DUF1640,DUF3336,DUF498,Fe-S_biosyn,Lyase_1,Methyltransf_29,PPR,Patatin,SRR1,TauD,UbiA,cNMP_binding
g13625.t1	EPT	ionotropic glutamate receptor activity	GRIK1	GO:0003674,GO:0004888,GO:0004970,GO:0005215,GO:0005216,GO:0005230,GO:0005261,GO:0005267,GO:0005272,GO:0005575,GO:0005623,GO:0005886,GO:0006810,GO:0006811,GO:0006812,GO:0006813,GO:0006814,GO:0007154,GO:0007165,GO:0007166,GO:0007215,GO:0007267,GO:0007268,GO:0007610,GO:0007632,GO:0007634,GO:0008066,GO:0008150,GO:0008324,GO:0009314,GO:0009416,GO:0009628,GO:0009642,GO:0009987,GO:0010646,GO:0015075,GO:…	-	ko:K05201,ko:K05202,ko:K05313	ANF_receptor,Cornifin,Lig_chan,Lig_chan-Glu_bd,SBP_bac_3,Sep15_SelM,Tetraspannin
g13626.t1	J	Belongs to the class I-like SAM-binding methyltransferase superfamily. RNA M5U methyltransferase family	TRMT2B	GO:0003674,GO:0003676,GO:0003723,GO:0003729,GO:0005488,GO:0097159,GO:1901363	2.1.1.35	ko:K15331,ko:K15332	FA_desaturase,MTS,Methyltransf_31,RINGv,RRM_1,UPF0020,tRNA_U5-meth_tr,zf-CCCH
g13627.t1	L	Rad50 zinc hook motif	RAD50	GO:0000003,GO:0000018,GO:0000019,GO:0000075,GO:0000077,GO:0000166,GO:0000228,GO:0000278,GO:0000280,GO:0000706,GO:0000722,GO:0000723,GO:0000724,GO:0000725,GO:0000726,GO:0000727,GO:0000729,GO:0000781,GO:0000784,GO:0000785,GO:0000790,GO:0000793,GO:0000794,GO:0001932,GO:0001934,GO:0003674,GO:0003676,GO:0003677,GO:0003678,GO:0003690,GO:0003691,GO:0003697,GO:0003824,GO:0004003,GO:0004017,GO:0004386,GO:…	-	ko:K10866,ko:K13912	AAA_15,AAA_21,AAA_23,MFS_1,PPP4R2,Rad50_zn_hook,SMC_N,SRCR,SbcCD_C
g13629.t1	S	microtubule anchoring	FGFR1OP	GO:0000086,GO:0000278,GO:0001558,GO:0001932,GO:0001933,GO:0003674,GO:0003824,GO:0004672,GO:0004713,GO:0004857,GO:0004860,GO:0005488,GO:0005515,GO:0005575,GO:0005622,GO:0005623,GO:0005634,GO:0005737,GO:0005813,GO:0005815,GO:0005829,GO:0005856,GO:0006464,GO:0006468,GO:0006469,GO:0006793,GO:0006796,GO:0006807,GO:0006996,GO:0007049,GO:0007346,GO:0008150,GO:0008152,GO:0008284,GO:0009892,GO:0009987,GO:…	-	ko:K16546	EF-hand_5,EF-hand_6,EF-hand_7,FOP_dimer
g13630.t1	M	GlcNAc-PI de-N-acetylase	PIGL	GO:0000225,GO:0003674,GO:0003824,GO:0005575,GO:0005622,GO:0005623,GO:0005737,GO:0005783,GO:0005789,GO:0006464,GO:0006497,GO:0006505,GO:0006506,GO:0006629,GO:0006643,GO:0006644,GO:0006650,GO:0006661,GO:0006664,GO:0006793,GO:0006796,GO:0006807,GO:0008150,GO:0008152,GO:0008610,GO:0008654,GO:0009058,GO:0009059,GO:0009247,GO:0009987,GO:0012505,GO:0016020,GO:0016021,GO:0016254,GO:0016787,GO:0016810,GO:…	3.5.1.89	ko:K03434	Cornichon,Ferrochelatase,PIG-L,Sugar_tr,TLD,Use1
g13631.t1	P	It is involved in the biological process described with response to metal ion	CUTA	GO:0003674,GO:0005488,GO:0005507,GO:0005515,GO:0005575,GO:0008104,GO:0008150,GO:0009987,GO:0016020,GO:0016043,GO:0019899,GO:0022607,GO:0033036,GO:0043167,GO:0043169,GO:0043933,GO:0044085,GO:0046872,GO:0046914,GO:0051179,GO:0051259,GO:0051260,GO:0065003,GO:0071840	-	ko:K03926	CutA1
g13631.t2	P	It is involved in the biological process described with response to metal ion	CUTA	GO:0003674,GO:0005488,GO:0005507,GO:0005515,GO:0005575,GO:0008104,GO:0008150,GO:0009987,GO:0016020,GO:0016043,GO:0019899,GO:0022607,GO:0033036,GO:0043167,GO:0043169,GO:0043933,GO:0044085,GO:0046872,GO:0046914,GO:0051179,GO:0051259,GO:0051260,GO:0065003,GO:0071840	-	ko:K03926	CutA1
g13633.t1	S	Protein phosphatase inhibitor	PPP1R11	GO:0000075,GO:0000164,GO:0000278,GO:0001817,GO:0001818,GO:0002791,GO:0002792,GO:0003674,GO:0003824,GO:0004842,GO:0004857,GO:0004864,GO:0004865,GO:0005488,GO:0005515,GO:0005575,GO:0005622,GO:0005623,GO:0005634,GO:0005737,GO:0005975,GO:0005976,GO:0005977,GO:0006073,GO:0006091,GO:0006112,GO:0006464,GO:0006508,GO:0006511,GO:0006807,GO:0006873,GO:0006950,GO:0006952,GO:0007049,GO:0007088,GO:0007093,GO:…	2.8.3.13	ko:K17553,ko:K18703	CoA_transf_3,MIP,PPI_Ypi1
g4093.t1	T	melatonin receptor activity	MTNR1A	GO:0000003,GO:0001654,GO:0002791,GO:0002792,GO:0003008,GO:0003013,GO:0003018,GO:0003674,GO:0004888,GO:0004930,GO:0005488,GO:0005575,GO:0005623,GO:0005886,GO:0005887,GO:0006109,GO:0006110,GO:0006140,GO:0006873,GO:0006874,GO:0006875,GO:0007154,GO:0007165,GO:0007186,GO:0007187,GO:0007188,GO:0007193,GO:0007267,GO:0007268,GO:0007275,GO:0007423,GO:0007568,GO:0007610,GO:0007617,GO:0007618,GO:0007623,GO:…	-	ko:K04160,ko:K04250,ko:K04255,ko:K04256,ko:K04285,ko:K04286,ko:K08409,ko:K08421,ko:K18627	7tm_1,ATG27,Kinesin
g4094.t1	M	positive regulation of cytolysis in other organism	PGLYRP3	GO:0000270,GO:0001817,GO:0001818,GO:0001906,GO:0001932,GO:0001933,GO:0002218,GO:0002221,GO:0002225,GO:0002237,GO:0002252,GO:0002253,GO:0002376,GO:0002682,GO:0002683,GO:0002684,GO:0002694,GO:0002695,GO:0002697,GO:0002698,GO:0002699,GO:0002700,GO:0002702,GO:0002757,GO:0002758,GO:0002759,GO:0002760,GO:0002764,GO:0002784,GO:0002786,GO:0002803,GO:0002805,GO:0002807,GO:0002808,GO:0002813,GO:0002831,GO:…	-	ko:K01446	Amidase_2
g4095.t1	S	deadenylation-dependent decapping of nuclear-transcribed mRNA	PATL2	GO:0000288,GO:0000290,GO:0000291,GO:0000775,GO:0000776,GO:0000932,GO:0000956,GO:0001731,GO:0002151,GO:0002181,GO:0002183,GO:0003674,GO:0003676,GO:0003682,GO:0003723,GO:0003727,GO:0003729,GO:0005488,GO:0005515,GO:0005575,GO:0005622,GO:0005623,GO:0005634,GO:0005654,GO:0005694,GO:0005737,GO:0005829,GO:0005840,GO:0006139,GO:0006401,GO:0006402,GO:0006412,GO:0006413,GO:0006417,GO:0006446,GO:0006518,GO:…	-	ko:K12617	7tm_1,FATC,PAT1,PI3_PI4_kinase,Spatacsin_C,TLV_coat
g4096.t1	T	Very low density lipoprotein receptor	VLDLR	GO:0000122,GO:0000323,GO:0000902,GO:0000904,GO:0001666,GO:0001932,GO:0001934,GO:0002237,GO:0003008,GO:0003674,GO:0004888,GO:0005041,GO:0005215,GO:0005488,GO:0005515,GO:0005575,GO:0005576,GO:0005615,GO:0005622,GO:0005623,GO:0005634,GO:0005737,GO:0005764,GO:0005765,GO:0005773,GO:0005774,GO:0005886,GO:0005905,GO:0006355,GO:0006357,GO:0006807,GO:0006810,GO:0006897,GO:0006898,GO:0006928,GO:0006935,GO:…	-	ko:K03068,ko:K12473,ko:K20051,ko:K20052,ko:K20053	Adap_comp_sub,Clat_adaptor_s,EGF,EGF_CA,FXa_inhibition,Ig_3,Ldl_recept_a,Ldl_recept_b,Sushi,Trypsin
g4097.t1	T	Low-density lipoprotein receptor repeat class B	LRP10	GO:0003674,GO:0005041,GO:0005488,GO:0005575,GO:0005623,GO:0005886,GO:0006629,GO:0006810,GO:0006869,GO:0006897,GO:0006898,GO:0007275,GO:0007423,GO:0008150,GO:0008152,GO:0010876,GO:0016020,GO:0016021,GO:0016192,GO:0030228,GO:0031224,GO:0032368,GO:0032370,GO:0032501,GO:0032502,GO:0032879,GO:0033036,GO:0038024,GO:0043583,GO:0044238,GO:0044425,GO:0044464,GO:0044877,GO:0048513,GO:0048518,GO:0048731,GO:…	-	ko:K20049,ko:K20050,ko:K20051,ko:K20053	CUB,EGF_CA,FXa_inhibition,Ig_2,Ig_3,Ldl_recept_a,Ldl_recept_b,cEGF
g4098.t1	Z	Dynein light chain type 1	DYNLL1	GO:0000003,GO:0000086,GO:0000278,GO:0000775,GO:0000776,GO:0001505,GO:0001775,GO:0002252,GO:0002263,GO:0002274,GO:0002275,GO:0002283,GO:0002366,GO:0002376,GO:0002443,GO:0002444,GO:0002446,GO:0002478,GO:0002495,GO:0002504,GO:0002791,GO:0002793,GO:0003006,GO:0003674,GO:0003824,GO:0004857,GO:0005488,GO:0005515,GO:0005575,GO:0005622,GO:0005623,GO:0005634,GO:0005694,GO:0005737,GO:0005739,GO:0005813,GO:…	-	ko:K10418	Dynein_light,Hist_deacetyl,p450,zf-B_box,zf-C3HC4
g4100.t1	P	Calcium-activated BK potassium channel alpha subunit	KCNMA1	GO:0000003,GO:0001505,GO:0001508,GO:0001666,GO:0002065,GO:0003008,GO:0003012,GO:0003013,GO:0003014,GO:0003018,GO:0003674,GO:0003779,GO:0005215,GO:0005216,GO:0005227,GO:0005244,GO:0005249,GO:0005261,GO:0005267,GO:0005488,GO:0005515,GO:0005575,GO:0005576,GO:0005615,GO:0005622,GO:0005623,GO:0005737,GO:0005783,GO:0005886,GO:0005887,GO:0005901,GO:0006810,GO:0006811,GO:0006812,GO:0006813,GO:0006873,GO:…	-	ko:K04936,ko:K05274	BK_channel_a,Ion_trans,Ion_trans_2,KA1,Pkinase,Ribosomal_60s,TrkA_N
g4101.t1	Z	positive regulation of ATP-dependent microtubule motor activity, plus-end-directed	DYNLL1	GO:0000003,GO:0000086,GO:0000132,GO:0000226,GO:0000278,GO:0000775,GO:0000776,GO:0001505,GO:0001775,GO:0002009,GO:0002165,GO:0002252,GO:0002263,GO:0002274,GO:0002275,GO:0002283,GO:0002366,GO:0002376,GO:0002443,GO:0002444,GO:0002446,GO:0002478,GO:0002495,GO:0002504,GO:0002791,GO:0002793,GO:0003006,GO:0003674,GO:0003824,GO:0004857,GO:0005488,GO:0005515,GO:0005575,GO:0005622,GO:0005623,GO:0005634,GO:…	-	ko:K10418	Dynein_light,Hist_deacetyl,p450,zf-B_box,zf-C3HC4
g4102.t1	S	Niemann-Pick disease, type C2	NPC2	GO:0000323,GO:0001530,GO:0001775,GO:0002165,GO:0002252,GO:0002263,GO:0002274,GO:0002275,GO:0002283,GO:0002366,GO:0002376,GO:0002443,GO:0002444,GO:0002446,GO:0003674,GO:0003823,GO:0005215,GO:0005319,GO:0005488,GO:0005496,GO:0005515,GO:0005539,GO:0005575,GO:0005576,GO:0005615,GO:0005622,GO:0005623,GO:0005737,GO:0005764,GO:0005766,GO:0005773,GO:0005775,GO:0006629,GO:0006694,GO:0006810,GO:0006811,GO:…	3.6.4.13	ko:K13443,ko:K17675	DUF3456,E1_DerP2_DerF2,EGF_CA,Helicase_C,SUV3_C
g4103.t1	O	Astacin (Peptidase family M12A)	-	-	3.4.24.21	ko:K08076	Astacin,CUB,ShK
g4106.t1	E	Cys/Met metabolism PLP-dependent enzyme	-	-	-	-	Cys_Met_Meta_PP
g4107.t1	T	guanylate cyclase activity	-	GO:0003674,GO:0003824,GO:0004383,GO:0005575,GO:0005622,GO:0005623,GO:0005737,GO:0005829,GO:0005886,GO:0005887,GO:0006139,GO:0006163,GO:0006164,GO:0006182,GO:0006725,GO:0006753,GO:0006793,GO:0006796,GO:0006807,GO:0007154,GO:0007165,GO:0008074,GO:0008150,GO:0008152,GO:0009058,GO:0009117,GO:0009150,GO:0009152,GO:0009165,GO:0009187,GO:0009190,GO:0009259,GO:0009260,GO:0009975,GO:0009987,GO:0016020,GO:…	4.6.1.2	ko:K12323,ko:K12324	ANF_receptor,Ank_2,Guanylate_cyc,HNOBA,Pkinase,Pkinase_Tyr
g4110.t1	U	ionotropic glutamate receptor activity	GRID1	GO:0001964,GO:0003008,GO:0003674,GO:0004888,GO:0005488,GO:0005515,GO:0005575,GO:0005623,GO:0005886,GO:0005887,GO:0007154,GO:0007155,GO:0007157,GO:0007165,GO:0007166,GO:0007215,GO:0007267,GO:0007268,GO:0007275,GO:0007399,GO:0007416,GO:0007417,GO:0007420,GO:0007610,GO:0008066,GO:0008104,GO:0008150,GO:0008328,GO:0009605,GO:0009653,GO:0009987,GO:0010646,GO:0010941,GO:0010975,GO:0014069,GO:0016020,GO:…	2.4.1.41	ko:K00710,ko:K05206,ko:K05207	ANF_receptor,Glycos_transf_2,Lig_chan,Lig_chan-Glu_bd,Peripla_BP_6,RVT_1,Ricin_B_lectin,SBP_bac_3
g4111.t1	T	catalytic activity. It is involved in the biological process described with metabolic process	PIGG	GO:0003674,GO:0003824,GO:0005575,GO:0005622,GO:0005623,GO:0005737,GO:0005783,GO:0005789,GO:0005886,GO:0005887,GO:0006464,GO:0006497,GO:0006505,GO:0006506,GO:0006629,GO:0006643,GO:0006644,GO:0006650,GO:0006661,GO:0006664,GO:0006793,GO:0006796,GO:0006807,GO:0006950,GO:0007154,GO:0008150,GO:0008152,GO:0008610,GO:0008654,GO:0009058,GO:0009059,GO:0009247,GO:0009267,GO:0009405,GO:0009605,GO:0009607,GO:…	-	ko:K05288,ko:K05310	DNA_pol_B_2,DUF2423,GOLGA2L5,Phosphodiest,Sulfatase
g4113.t1	T	Tyrosine kinase, catalytic domain	-	GO:0003674,GO:0003824,GO:0004672,GO:0004713,GO:0005575,GO:0005623,GO:0005886,GO:0005887,GO:0006464,GO:0006468,GO:0006793,GO:0006796,GO:0006807,GO:0006950,GO:0006996,GO:0007030,GO:0007155,GO:0008150,GO:0008152,GO:0008361,GO:0009611,GO:0009987,GO:0010256,GO:0016020,GO:0016021,GO:0016043,GO:0016301,GO:0016310,GO:0016339,GO:0016740,GO:0016772,GO:0016773,GO:0018108,GO:0018193,GO:0018212,GO:0019538,GO:…	2.7.10.1	ko:K04362,ko:K05093,ko:K05094,ko:K05126,ko:K08252	C2-set_2,CUB,Cadherin,EGF,Ig_2,Ig_3,Pkinase_Tyr,ig
g6696.t1	T	Natriuretic peptide receptor	NPR1	GO:0000166,GO:0001558,GO:0001653,GO:0001882,GO:0001883,GO:0003008,GO:0003013,GO:0003014,GO:0003018,GO:0003674,GO:0003824,GO:0004383,GO:0004888,GO:0004930,GO:0005488,GO:0005515,GO:0005525,GO:0005575,GO:0005622,GO:0005623,GO:0005737,GO:0005829,GO:0005886,GO:0005887,GO:0006139,GO:0006163,GO:0006164,GO:0006182,GO:0006584,GO:0006725,GO:0006753,GO:0006793,GO:0006796,GO:0006807,GO:0006810,GO:0006935,GO:…	4.6.1.2	ko:K12323,ko:K12324,ko:K12325,ko:K13140	ANF_receptor,Dimer_Tnp_hAT,Guanylate_cyc,HNOBA,Ints3,Pkinase,Pkinase_Tyr
g6697.t1	O	Zinc-dependent metalloprotease	MEP1B	GO:0003674,GO:0003824,GO:0004175,GO:0004222,GO:0005488,GO:0005515,GO:0005575,GO:0005623,GO:0005886,GO:0005887,GO:0006508,GO:0006807,GO:0006810,GO:0007275,GO:0007610,GO:0007631,GO:0008150,GO:0008152,GO:0008233,GO:0008237,GO:0016020,GO:0016021,GO:0016787,GO:0017090,GO:0019538,GO:0031224,GO:0031226,GO:0032501,GO:0032502,GO:0032991,GO:0035295,GO:0042755,GO:0042802,GO:0043050,GO:0043170,GO:0044238,GO:…	3.4.24.21,3.4.24.63	ko:K08076,ko:K08606	Astacin,EGF,Histone,MAM,ShK,TSP_1,Trypsin
g6698.t1	O	endopeptidase inhibitor activity	CD109	GO:0000768,GO:0001932,GO:0001933,GO:0001942,GO:0002376,GO:0002520,GO:0002521,GO:0002573,GO:0002576,GO:0003674,GO:0005488,GO:0005515,GO:0005575,GO:0005576,GO:0005622,GO:0005623,GO:0005737,GO:0005886,GO:0006810,GO:0006887,GO:0006949,GO:0006950,GO:0006952,GO:0007275,GO:0008150,GO:0008285,GO:0008544,GO:0009605,GO:0009607,GO:0009617,GO:0009653,GO:0009888,GO:0009892,GO:0009966,GO:0009968,GO:0009987,GO:…	-	ko:K03910,ko:K06530	A2M,A2M_N,A2M_N_2,A2M_comp,A2M_recep,DUF1891,TLV_coat,Thiol-ester_cl
g6698.t2	O	endopeptidase inhibitor activity	CD109	GO:0000768,GO:0001932,GO:0001933,GO:0001942,GO:0002376,GO:0002520,GO:0002521,GO:0002573,GO:0002576,GO:0003674,GO:0005488,GO:0005515,GO:0005575,GO:0005576,GO:0005622,GO:0005623,GO:0005737,GO:0005886,GO:0006810,GO:0006887,GO:0006949,GO:0006950,GO:0006952,GO:0007275,GO:0008150,GO:0008285,GO:0008544,GO:0009605,GO:0009607,GO:0009617,GO:0009653,GO:0009888,GO:0009892,GO:0009966,GO:0009968,GO:0009987,GO:…	-	ko:K03910,ko:K06530	A2M,A2M_N,A2M_N_2,A2M_comp,A2M_recep,DUF1891,TLV_coat,Thiol-ester_cl
g6699.t1	O	Zinc-dependent metalloprotease	nas-15	-	3.4.24.21,3.4.24.63	ko:K08076,ko:K08606	Astacin,ShK,TSP_1
g6700.t1	O	Zinc-dependent metalloprotease	MEP1B	GO:0003674,GO:0003824,GO:0004175,GO:0004222,GO:0005488,GO:0005515,GO:0005575,GO:0005623,GO:0005886,GO:0005887,GO:0006508,GO:0006807,GO:0006810,GO:0007275,GO:0007610,GO:0007631,GO:0008150,GO:0008152,GO:0008233,GO:0008237,GO:0016020,GO:0016021,GO:0016787,GO:0017090,GO:0019538,GO:0031224,GO:0031226,GO:0032501,GO:0032502,GO:0032991,GO:0035295,GO:0042755,GO:0042802,GO:0043050,GO:0043170,GO:0044238,GO:…	3.4.24.21,3.4.24.63	ko:K08076,ko:K08606	Astacin,EGF,Histone,MAM,ShK,TSP_1,Trypsin
g6701.t1	O	Zinc-dependent metalloprotease	MEP1B	GO:0003674,GO:0003824,GO:0004175,GO:0004222,GO:0005488,GO:0005515,GO:0005575,GO:0005576,GO:0005615,GO:0005623,GO:0005886,GO:0005887,GO:0006508,GO:0006807,GO:0006810,GO:0008150,GO:0008152,GO:0008233,GO:0008237,GO:0016020,GO:0016021,GO:0016787,GO:0017090,GO:0019538,GO:0031224,GO:0031226,GO:0032991,GO:0042802,GO:0043170,GO:0044238,GO:0044421,GO:0044425,GO:0044459,GO:0044464,GO:0051179,GO:0051234,GO:…	3.4.24.18,3.4.24.63	ko:K01395,ko:K08606,ko:K08778	Astacin,DUF1891,EGF,Histone,Kringle,Ldl_recept_a,Lectin_C,MAM,Methyltransf_FA,ShK,TSP_1,VCBS,VWD
g6702.t1	O	Low choriolytic enzyme-like	ASTL	GO:0000003,GO:0001775,GO:0003674,GO:0003824,GO:0005575,GO:0005622,GO:0005623,GO:0005737,GO:0005886,GO:0006508,GO:0006807,GO:0007155,GO:0007338,GO:0007343,GO:0008150,GO:0008152,GO:0008233,GO:0009566,GO:0009893,GO:0009987,GO:0010468,GO:0010604,GO:0010628,GO:0010954,GO:0012505,GO:0016020,GO:0016787,GO:0019222,GO:0019538,GO:0019953,GO:0022414,GO:0022610,GO:0030133,GO:0030141,GO:0030162,GO:0031323,GO:…	3.4.24.63,3.4.24.66	ko:K08606,ko:K13047,ko:K18542	Astacin,CUB,F5_F8_type_C,Laminin_G_3,Lectin_C,MAM,Methyltransf_FA,Ricin_B_lectin,ShK,TSP_1,VWD
g6707.t1	S	MFS_1 like family	-	-	-	-	MFS_1_like,Nuc_H_symport
g6708.t1	K	sequence-specific DNA binding. It is involved in the biological process described with regulation of transcription, DNA-templated	BSX	GO:0000976,GO:0000977,GO:0000978,GO:0000981,GO:0000982,GO:0000987,GO:0001012,GO:0001067,GO:0001077,GO:0001228,GO:0003674,GO:0003676,GO:0003677,GO:0003690,GO:0003700,GO:0005488,GO:0005575,GO:0005622,GO:0005623,GO:0005634,GO:0005667,GO:0005737,GO:0006139,GO:0006351,GO:0006355,GO:0006357,GO:0006366,GO:0006725,GO:0006807,GO:0007275,GO:0007399,GO:0007417,GO:0007420,GO:0007610,GO:0007626,GO:0007631,GO:…	-	-	Homeobox
g6709.t1	T	guanylate cyclase activity. It is involved in the biological process described with intracellular signal transduction	-	GO:0003674,GO:0003824,GO:0004383,GO:0005575,GO:0005622,GO:0005623,GO:0005737,GO:0005829,GO:0005886,GO:0005887,GO:0006139,GO:0006163,GO:0006164,GO:0006182,GO:0006725,GO:0006753,GO:0006793,GO:0006796,GO:0006807,GO:0007154,GO:0007165,GO:0008074,GO:0008150,GO:0008152,GO:0009058,GO:0009117,GO:0009150,GO:0009152,GO:0009165,GO:0009187,GO:0009190,GO:0009259,GO:0009260,GO:0009975,GO:0009987,GO:0016020,GO:…	4.6.1.2	ko:K12323,ko:K12324	ANF_receptor,Ank_2,Guanylate_cyc,HNOBA,Pkinase,Pkinase_Tyr
g6710.t1	O	Belongs to the peptidase C1 family	ALG14	GO:0003674,GO:0003824,GO:0004175,GO:0004197,GO:0004577,GO:0005488,GO:0005515,GO:0005575,GO:0005576,GO:0005622,GO:0005623,GO:0005737,GO:0005783,GO:0005789,GO:0006464,GO:0006486,GO:0006487,GO:0006488,GO:0006490,GO:0006508,GO:0006629,GO:0006807,GO:0007154,GO:0007267,GO:0008150,GO:0008152,GO:0008194,GO:0008233,GO:0008234,GO:0008375,GO:0009056,GO:0009057,GO:0009058,GO:0009059,GO:0009100,GO:0009101,GO:…	2.4.1.141,3.4.14.1,3.4.18.1,3.4.22.1,3.4.22.15,3.4.22.41	ko:K01275,ko:K01363,ko:K01365,ko:K01373,ko:K07441,ko:K08568	Alg14,CH,Calponin,CathepsinC_exc,Cupin_8,Fra10Ac1,Glyco_hydro_18,Glyco_tran_28_C,Inhibitor_I29,PPR_2,Peptidase_C1,Peptidase_M16,Peptidase_M16_C,Peptidase_M16_M,Propeptide_C1,adh_short_C2
g8824.t1	K	Belongs to the SKP1 family	TCEB1	GO:0000003,GO:0000151,GO:0000153,GO:0000280,GO:0000578,GO:0000819,GO:0001666,GO:0002009,GO:0002165,GO:0003002,GO:0003674,GO:0005488,GO:0005515,GO:0005575,GO:0005622,GO:0005623,GO:0005634,GO:0005654,GO:0005694,GO:0005700,GO:0005705,GO:0005737,GO:0005829,GO:0006139,GO:0006259,GO:0006281,GO:0006289,GO:0006351,GO:0006354,GO:0006355,GO:0006357,GO:0006366,GO:0006368,GO:0006464,GO:0006725,GO:0006807,GO:…	-	ko:K03872	FA_hydroxylase,Methyltransf_25,Skp1_POZ
g8824.t2	K	Belongs to the SKP1 family	TCEB1	GO:0000003,GO:0000151,GO:0000153,GO:0000280,GO:0000578,GO:0000819,GO:0001666,GO:0002009,GO:0002165,GO:0003002,GO:0003674,GO:0005488,GO:0005515,GO:0005575,GO:0005622,GO:0005623,GO:0005634,GO:0005654,GO:0005694,GO:0005700,GO:0005705,GO:0005737,GO:0005829,GO:0006139,GO:0006259,GO:0006281,GO:0006289,GO:0006351,GO:0006354,GO:0006355,GO:0006357,GO:0006366,GO:0006368,GO:0006464,GO:0006725,GO:0006807,GO:…	-	ko:K03872	FA_hydroxylase,Methyltransf_25,Skp1_POZ
g8825.t1	S	stress fiber assembly	PHACTR1	GO:0001654,GO:0001667,GO:0001755,GO:0001838,GO:0001841,GO:0001843,GO:0002009,GO:0002011,GO:0002072,GO:0002576,GO:0003674,GO:0003779,GO:0004857,GO:0004864,GO:0005488,GO:0005515,GO:0005575,GO:0005622,GO:0005623,GO:0005634,GO:0005654,GO:0005737,GO:0005829,GO:0005886,GO:0006810,GO:0006887,GO:0006928,GO:0006996,GO:0007010,GO:0007015,GO:0007154,GO:0007165,GO:0007264,GO:0007265,GO:0007266,GO:0007275,GO:…	5.1.99.6	ko:K17585,ko:K17594,ko:K17759	F-box,RPEL,YjeF_N
g8826.t1	O	homolog subfamily B member	DNAJB2	GO:0000003,GO:0001558,GO:0001671,GO:0001701,GO:0001890,GO:0001892,GO:0003006,GO:0003674,GO:0003676,GO:0003677,GO:0005488,GO:0005515,GO:0005575,GO:0005622,GO:0005623,GO:0005634,GO:0005635,GO:0005654,GO:0005737,GO:0005783,GO:0005789,GO:0005813,GO:0005815,GO:0005829,GO:0005856,GO:0006355,GO:0006457,GO:0006508,GO:0006511,GO:0006807,GO:0006950,GO:0006986,GO:0006996,GO:0007010,GO:0007155,GO:0007275,GO:…	-	ko:K09508,ko:K09509,ko:K09512,ko:K09513,ko:K09514	DnaJ,UIM
g8827.t1	T	ATP binding. It is involved in the biological process described with protein phosphorylation	JAK2	GO:0000165,GO:0000902,GO:0000904,GO:0001654,GO:0001700,GO:0001932,GO:0001934,GO:0002009,GO:0002165,GO:0002262,GO:0002376,GO:0002520,GO:0003674,GO:0003824,GO:0004672,GO:0004713,GO:0004715,GO:0005102,GO:0005126,GO:0005131,GO:0005488,GO:0005515,GO:0005575,GO:0005622,GO:0005623,GO:0005634,GO:0005886,GO:0005912,GO:0006082,GO:0006091,GO:0006099,GO:0006101,GO:0006325,GO:0006464,GO:0006468,GO:0006793,GO:…	2.7.10.2	ko:K04447,ko:K08892	Pkinase_Tyr,SH2,SH3_1
g8827.t2	T	ATP binding. It is involved in the biological process described with protein phosphorylation	JAK2	GO:0000165,GO:0000902,GO:0000904,GO:0001654,GO:0001700,GO:0001932,GO:0001934,GO:0002009,GO:0002165,GO:0002262,GO:0002376,GO:0002520,GO:0003674,GO:0003824,GO:0004672,GO:0004713,GO:0004715,GO:0005102,GO:0005126,GO:0005131,GO:0005488,GO:0005515,GO:0005575,GO:0005622,GO:0005623,GO:0005634,GO:0005886,GO:0005912,GO:0006082,GO:0006091,GO:0006099,GO:0006101,GO:0006325,GO:0006464,GO:0006468,GO:0006793,GO:…	2.7.10.2	ko:K04447,ko:K08892	Pkinase_Tyr,SH2,SH3_1
g8828.t1	K	catalytic domain of ctd-like phosphatases	-	GO:0003674,GO:0003824,GO:0004721,GO:0006464,GO:0006470,GO:0006793,GO:0006796,GO:0006807,GO:0008150,GO:0008152,GO:0009987,GO:0016311,GO:0016787,GO:0016788,GO:0016791,GO:0019538,GO:0036211,GO:0042578,GO:0043170,GO:0043412,GO:0044237,GO:0044238,GO:0044260,GO:0044267,GO:0071704,GO:0140096,GO:1901564	2.7.11.25	ko:K04424,ko:K17616	DUF1230,EDR1,HORMA,NIF,Pkinase_Tyr,REF,adh_short_C2
g10133.t1	L	Belongs to the helicase family	-	-	3.6.4.12	ko:K15255	Ank_4,Helitron_like_N,Herpes_Helicase,PIF1,RVP_2
g10134.t1	V	Belongs to the serpin family	SRPN17	-	-	ko:K03984,ko:K13963	Serpin
g10135.t1	T	It is involved in the biological process described with	-	GO:0003674,GO:0003824,GO:0004383,GO:0005575,GO:0005622,GO:0005623,GO:0005737,GO:0005829,GO:0005886,GO:0005887,GO:0006139,GO:0006163,GO:0006164,GO:0006182,GO:0006725,GO:0006753,GO:0006793,GO:0006796,GO:0006807,GO:0007154,GO:0007165,GO:0008074,GO:0008150,GO:0008152,GO:0009058,GO:0009117,GO:0009150,GO:0009152,GO:0009165,GO:0009187,GO:0009190,GO:0009259,GO:0009260,GO:0009975,GO:0009987,GO:0016020,GO:…	4.6.1.2	ko:K12323,ko:K12324	ANF_receptor,Ank_2,Guanylate_cyc,HNOBA,Pkinase,Pkinase_Tyr
g10137.t1	S	Interferon-inducible GTPase 5-like	Ifggb1	GO:0002376,GO:0003674,GO:0003824,GO:0003924,GO:0005575,GO:0005622,GO:0005623,GO:0005737,GO:0005783,GO:0005789,GO:0006950,GO:0006952,GO:0006955,GO:0008150,GO:0009605,GO:0009607,GO:0009615,GO:0009617,GO:0009987,GO:0010033,GO:0012505,GO:0016020,GO:0016462,GO:0016787,GO:0016817,GO:0016818,GO:0017111,GO:0031984,GO:0034097,GO:0034341,GO:0035455,GO:0035456,GO:0035458,GO:0042175,GO:0042221,GO:0043207,GO:…	-	-	IIGP
g10138.t1	K	Scm-like with four mbt domains	SFMBT2	GO:0003674,GO:0005488,GO:0005515,GO:0005575,GO:0005622,GO:0005623,GO:0005634,GO:0005654,GO:0008150,GO:0009892,GO:0010468,GO:0010605,GO:0010629,GO:0016234,GO:0016235,GO:0016604,GO:0016607,GO:0019222,GO:0031974,GO:0031981,GO:0042393,GO:0043226,GO:0043227,GO:0043229,GO:0043231,GO:0043233,GO:0044422,GO:0044424,GO:0044428,GO:0044446,GO:0044451,GO:0044464,GO:0048519,GO:0050789,GO:0060255,GO:0065007,GO:…	-	-	MBT,RVT_1,SAM_1,SLED
g10141.t1	T	Protein phosphatase, EF-hand calcium binding domain 2	PPEF2	GO:0001750,GO:0001917,GO:0001932,GO:0001933,GO:0003674,GO:0003824,GO:0004721,GO:0004722,GO:0004723,GO:0005488,GO:0005515,GO:0005516,GO:0005575,GO:0005622,GO:0005623,GO:0005634,GO:0005737,GO:0005929,GO:0006464,GO:0006470,GO:0006793,GO:0006796,GO:0006807,GO:0007154,GO:0007165,GO:0007602,GO:0008150,GO:0008152,GO:0008277,GO:0009266,GO:0009314,GO:0009416,GO:0009581,GO:0009582,GO:0009583,GO:0009605,GO:…	3.1.3.16	ko:K13807	EF-hand_1,EF-hand_5,EF-hand_7,EF-hand_8,Gag_p24,IQ,Metallophos,PPP5,zf-CCHC
g10141.t2	T	Protein phosphatase, EF-hand calcium binding domain 2	PPEF2	GO:0001750,GO:0001917,GO:0001932,GO:0001933,GO:0003674,GO:0003824,GO:0004721,GO:0004722,GO:0004723,GO:0005488,GO:0005515,GO:0005516,GO:0005575,GO:0005622,GO:0005623,GO:0005634,GO:0005737,GO:0005929,GO:0006464,GO:0006470,GO:0006793,GO:0006796,GO:0006807,GO:0007154,GO:0007165,GO:0007602,GO:0008150,GO:0008152,GO:0008277,GO:0009266,GO:0009314,GO:0009416,GO:0009581,GO:0009582,GO:0009583,GO:0009605,GO:…	3.1.3.16	ko:K13807	EF-hand_1,EF-hand_5,EF-hand_7,EF-hand_8,Gag_p24,IQ,Metallophos,PPP5,zf-CCHC
g11768.t1	S	proton channel activity	-	-	-	-	DDE_3,DUF4817,HTH_24,Otopetrin,Y_phosphatase
g11769.t1	P	Carbonic anhydrase	CA13	GO:0003674,GO:0003824,GO:0004089,GO:0005575,GO:0005622,GO:0005623,GO:0005737,GO:0005829,GO:0006730,GO:0006810,GO:0006811,GO:0006820,GO:0006950,GO:0006970,GO:0006971,GO:0008150,GO:0008152,GO:0009628,GO:0009651,GO:0009987,GO:0015669,GO:0015670,GO:0015701,GO:0015711,GO:0015893,GO:0016829,GO:0016835,GO:0016836,GO:0019755,GO:0042221,GO:0042493,GO:0042539,GO:0043209,GO:0043226,GO:0043227,GO:0043229,GO:…	4.2.1.1	ko:K01672,ko:K18245	Carb_anhydrase
g11770.t1	T	guanylate cyclase activity	-	GO:0003674,GO:0003824,GO:0004383,GO:0005575,GO:0005622,GO:0005623,GO:0005737,GO:0005829,GO:0005886,GO:0005887,GO:0006139,GO:0006163,GO:0006164,GO:0006182,GO:0006725,GO:0006753,GO:0006793,GO:0006796,GO:0006807,GO:0007154,GO:0007165,GO:0008074,GO:0008150,GO:0008152,GO:0009058,GO:0009117,GO:0009150,GO:0009152,GO:0009165,GO:0009187,GO:0009190,GO:0009259,GO:0009260,GO:0009975,GO:0009987,GO:0016020,GO:…	4.6.1.2	ko:K12323,ko:K12324,ko:K12325	ANF_receptor,Ank_2,Guanylate_cyc,HNOBA,Pkinase,Pkinase_Tyr
g11771.t1	G	Major Facilitator Superfamily	im:7160594	-	-	-	ATG22,Fn3-like,MFS_1,Sugar_tr,Xan_ur_permease,tRNA-synt_1g
g11774.t1	S	Neugrin	-	-	-	-	Neugrin
g11775.t1	T	C-terminal region of MMR_HSR1 domain	DRG2	GO:0000166,GO:0001882,GO:0001883,GO:0002181,GO:0003674,GO:0003824,GO:0003924,GO:0005488,GO:0005515,GO:0005525,GO:0005543,GO:0005575,GO:0005622,GO:0005623,GO:0005634,GO:0005654,GO:0005737,GO:0005829,GO:0006412,GO:0006518,GO:0006807,GO:0007154,GO:0007165,GO:0008150,GO:0008152,GO:0008289,GO:0009058,GO:0009059,GO:0009987,GO:0010467,GO:0010646,GO:0010647,GO:0016462,GO:0016787,GO:0016817,GO:0016818,GO:…	-	ko:K06944	EF-hand_5,EF-hand_7,MMR_HSR1,MMR_HSR1_Xtn,NAM-associated,RRM_1,TGS,Torus
g11776.t1	U	Belongs to the syntaxin family	STX7	GO:0000011,GO:0000045,GO:0000149,GO:0000322,GO:0000323,GO:0000324,GO:0000325,GO:0000329,GO:0000407,GO:0001505,GO:0001772,GO:0001910,GO:0001912,GO:0001914,GO:0001916,GO:0002165,GO:0002682,GO:0002684,GO:0002697,GO:0002699,GO:0002703,GO:0002705,GO:0002706,GO:0002708,GO:0002709,GO:0002711,GO:0002819,GO:0002821,GO:0002822,GO:0002824,GO:0003674,GO:0005484,GO:0005488,GO:0005515,GO:0005575,GO:0005622,GO:…	3.1.2.1	ko:K01067,ko:K03321,ko:K08455,ko:K08488,ko:K13216,ko:K13813,ko:K21155	7tm_2,Abhydrolase_1,AcetylCoA_hyd_C,AcetylCoA_hydro,CarD_CdnL_TRCF,DEAD,FHA,GPS,Helicase_C,LEA_2,LRR_8,PGG,RhoGAP,Rtt106,SNARE,STAS,Sulfate_transp,Synaptobrevin,Syntaxin,Syntaxin_2,ThiF,cNMP_binding
g11777.t1	T	Belongs to the sodium neurotransmitter symporter (SNF) (TC 2.A.22) family	SLC6A7	GO:0003333,GO:0003674,GO:0005215,GO:0005283,GO:0005298,GO:0005342,GO:0005343,GO:0005416,GO:0005575,GO:0005623,GO:0005886,GO:0005887,GO:0006810,GO:0006811,GO:0006812,GO:0006814,GO:0006820,GO:0006855,GO:0006865,GO:0008150,GO:0008324,GO:0008509,GO:0008514,GO:0015075,GO:0015077,GO:0015081,GO:0015171,GO:0015175,GO:0015179,GO:0015193,GO:0015238,GO:0015291,GO:0015293,GO:0015294,GO:0015318,GO:0015370,GO:…	-	ko:K05038	SNF
g11778.t1	T	Neural ectodermal development factor	ImpL2	GO:0003674,GO:0005488,GO:0005515,GO:0005520,GO:0005575,GO:0005576,GO:0005615,GO:0006950,GO:0007275,GO:0007399,GO:0007568,GO:0008150,GO:0008340,GO:0009605,GO:0009966,GO:0009967,GO:0009968,GO:0009987,GO:0009991,GO:0010259,GO:0010646,GO:0010647,GO:0010648,GO:0010883,GO:0010888,GO:0014066,GO:0014067,GO:0017046,GO:0019838,GO:0022008,GO:0022611,GO:0023051,GO:0023056,GO:0023057,GO:0030154,GO:0030182,GO:…	-	-	C2-set_2,I-set,Ig_3,V-set,ig
g11982.t1	K	Ligand binding domain of hormone receptors	nhr-236	-	-	ko:K08543,ko:K08545,ko:K08546	Hormone_recep,PPARgamma_N,zf-C4
g11983.t1	S	chitin binding. It is involved in the biological process described with chitin metabolic process	-	-	-	-	CBM_14
g11985.t1	P	large conductance calcium-activated potassium channel activity	KCNMA1	GO:0000003,GO:0001505,GO:0001508,GO:0001666,GO:0002065,GO:0003008,GO:0003012,GO:0003013,GO:0003014,GO:0003018,GO:0003674,GO:0003779,GO:0005215,GO:0005216,GO:0005227,GO:0005244,GO:0005249,GO:0005261,GO:0005267,GO:0005488,GO:0005515,GO:0005575,GO:0005576,GO:0005615,GO:0005622,GO:0005623,GO:0005737,GO:0005783,GO:0005886,GO:0005887,GO:0005901,GO:0006810,GO:0006811,GO:0006812,GO:0006813,GO:0006873,GO:…	-	ko:K04936,ko:K05274	BK_channel_a,Ion_trans,Ion_trans_2,KA1,Pkinase,Ribosomal_60s,TrkA_N
g11986.t1	O	Matrixin	Mmp1	GO:0001838,GO:0002009,GO:0002164,GO:0002165,GO:0002168,GO:0003007,GO:0003143,GO:0003144,GO:0005575,GO:0005623,GO:0006950,GO:0007155,GO:0007275,GO:0007399,GO:0007413,GO:0007417,GO:0007419,GO:0007424,GO:0007444,GO:0007503,GO:0007505,GO:0007507,GO:0007552,GO:0007560,GO:0007561,GO:0007591,GO:0008037,GO:0008038,GO:0008150,GO:0009611,GO:0009653,GO:0009790,GO:0009791,GO:0009886,GO:0009887,GO:0009888,GO:…	3.4.24.12,3.4.24.80	ko:K07763,ko:K07994,ko:K07997,ko:K19957	Cornifin,Glypican,Hemopexin,PG_binding_1,Patatin,Peptidase_M10
g11987.t1	U	exocytosis	EXOC7	GO:0000131,GO:0000145,GO:0000920,GO:0001411,GO:0001505,GO:0001927,GO:0003674,GO:0005488,GO:0005515,GO:0005543,GO:0005546,GO:0005575,GO:0005622,GO:0005623,GO:0005628,GO:0005737,GO:0005813,GO:0005815,GO:0005829,GO:0005856,GO:0005886,GO:0005933,GO:0005934,GO:0005935,GO:0005937,GO:0005938,GO:0006810,GO:0006836,GO:0006886,GO:0006887,GO:0006892,GO:0006893,GO:0006903,GO:0006904,GO:0007154,GO:0007165,GO:…	-	ko:K02865,ko:K07195	ACC_central,Aminotran_3,Cas1_AcylT,DUF1943,Exo70,Methyltransf_25,MinE,Profilin,Ribosomal_L1,SAM_2,Sec34,TAXi_C,TAXi_N,VWD,Vitellogenin_N
g11988.t1	L	RNA pyrophosphohydrolase activity	DXO	GO:0000003,GO:0000166,GO:0000287,GO:0000291,GO:0000448,GO:0000460,GO:0000463,GO:0000466,GO:0000469,GO:0000470,GO:0000478,GO:0000479,GO:0000578,GO:0000956,GO:0001882,GO:0001883,GO:0003002,GO:0003006,GO:0003674,GO:0003676,GO:0003723,GO:0003729,GO:0003824,GO:0004518,GO:0004519,GO:0004521,GO:0004527,GO:0004540,GO:0005488,GO:0005575,GO:0005622,GO:0005623,GO:0005634,GO:0005737,GO:0005829,GO:0005886,GO:…	-	ko:K14845,ko:K18404	Methyltransf_11,PPR,Pkinase,RAI1,VEFS-Box
g11989.t1	L	DNA binding. It is involved in the biological process described with DNA replication	ORC3	GO:0000003,GO:0000082,GO:0000228,GO:0000278,GO:0000781,GO:0000784,GO:0000785,GO:0000790,GO:0000808,GO:0001667,GO:0002064,GO:0002065,GO:0002066,GO:0003006,GO:0003008,GO:0003674,GO:0003676,GO:0003677,GO:0003682,GO:0003688,GO:0003690,GO:0005488,GO:0005575,GO:0005622,GO:0005623,GO:0005634,GO:0005654,GO:0005656,GO:0005657,GO:0005664,GO:0005694,GO:0006139,GO:0006259,GO:0006260,GO:0006261,GO:0006267,GO:…	-	ko:K02605,ko:K15210	LTP_2,ORC3_N,Phosphodiest,SIKE,zf-SNAP50_C
g11990.t1	S	Transducin beta-like	TBL2	GO:0001666,GO:0003674,GO:0005488,GO:0005515,GO:0005575,GO:0005622,GO:0005623,GO:0005737,GO:0005783,GO:0005789,GO:0006950,GO:0006986,GO:0007154,GO:0007165,GO:0008150,GO:0009267,GO:0009605,GO:0009628,GO:0009987,GO:0009991,GO:0010033,GO:0012505,GO:0016020,GO:0016021,GO:0019899,GO:0019900,GO:0019901,GO:0023052,GO:0030176,GO:0030968,GO:0031224,GO:0031227,GO:0031369,GO:0031667,GO:0031668,GO:0031669,GO:…	2.7.7.50	ko:K09113,ko:K13917,ko:K14570	ANAPC4_WD40,DSPc,HLH,RNase_T,WD40,mRNA_cap_C,mRNA_cap_enzyme
g12905.t1	L	transposition, RNA-mediated	-	-	-	-	Baculo_F,Chromo,Pkinase,rve
g12906.t1	L	transposition, RNA-mediated	-	-	-	-	Baculo_F,Chromo,Pkinase,rve
g12907.t1	S	oxidation-reduction process	-	-	-	-	Exo_endo_phos_2,Herpes_teg_N
g12913.t1	T	family, member 25	KLHL25	GO:0000151,GO:0005575,GO:0005622,GO:0005623,GO:0005737,GO:0005829,GO:0006417,GO:0006446,GO:0006464,GO:0006508,GO:0006511,GO:0006807,GO:0008150,GO:0008152,GO:0009056,GO:0009057,GO:0009889,GO:0009987,GO:0010468,GO:0010556,GO:0010608,GO:0016567,GO:0019222,GO:0019538,GO:0019941,GO:0030163,GO:0031323,GO:0031326,GO:0031461,GO:0031463,GO:0032268,GO:0032446,GO:0032991,GO:0034248,GO:0036211,GO:0043170,GO:…	-	ko:K10462	BACK,BTB,Kelch_1,Kelch_4
g12914.t1	O	Belongs to the peptidase C1 family	CTSB	GO:0000003,GO:0000323,GO:0001775,GO:0001890,GO:0001893,GO:0002252,GO:0002263,GO:0002274,GO:0002275,GO:0002283,GO:0002366,GO:0002376,GO:0002443,GO:0002444,GO:0002446,GO:0003006,GO:0003674,GO:0003824,GO:0004175,GO:0004197,GO:0004252,GO:0005488,GO:0005515,GO:0005518,GO:0005575,GO:0005576,GO:0005615,GO:0005622,GO:0005623,GO:0005634,GO:0005730,GO:0005737,GO:0005739,GO:0005764,GO:0005768,GO:0005773,GO:…	3.4.14.1,3.4.18.1,3.4.22.1,3.4.22.15,3.4.22.27,3.4.22.38	ko:K01275,ko:K01363,ko:K01365,ko:K01368,ko:K01371,ko:K08568	CathepsinC_exc,Inhibitor_I29,Peptidase_C1,Propeptide_C1
g12916.t1	S	Zona pellucida (ZP) domain	-	-	-	-	Zona_pellucida
g13457.t1	T	It is involved in the biological process described with	-	GO:0003674,GO:0003824,GO:0004383,GO:0005575,GO:0005622,GO:0005623,GO:0005737,GO:0005829,GO:0005886,GO:0005887,GO:0006139,GO:0006163,GO:0006164,GO:0006182,GO:0006725,GO:0006753,GO:0006793,GO:0006796,GO:0006807,GO:0007154,GO:0007165,GO:0008074,GO:0008150,GO:0008152,GO:0009058,GO:0009117,GO:0009150,GO:0009152,GO:0009165,GO:0009187,GO:0009190,GO:0009259,GO:0009260,GO:0009975,GO:0009987,GO:0016020,GO:…	4.6.1.2	ko:K12323,ko:K12324	ANF_receptor,Ank_2,Guanylate_cyc,HNOBA,Pkinase,Pkinase_Tyr
g13458.t1	S	Expressed protein	-	-	-	-	HtrL_YibB
g13459.t1	T	Fibronectin type 3 domain	-	-	-	ko:K16353,ko:K19599	7tm_2,AIG1,F5_F8_type_C,Fibrinogen_C,Furin-like_2,GAIN,GPS,HRM,I-set,Ig_3,Septin,TLD,TNFR_c6,fn3,ig
g13460.t1	O	Astacin-like metallo-endopeptidase (M12 family)	-	-	3.4.24.63	ko:K08606	Astacin,Ricin_B_lectin
g13965.t1	-	-	-	-	-	-	AIG1,Dynamin_N,MMR_HSR1,Septin
g13967.t1	S	CAS1 domain-containing protein	CASD1	GO:0000139,GO:0003674,GO:0003824,GO:0005575,GO:0005622,GO:0005623,GO:0005737,GO:0005794,GO:0005975,GO:0007154,GO:0007267,GO:0008150,GO:0008152,GO:0008374,GO:0009987,GO:0012505,GO:0016020,GO:0016021,GO:0016407,GO:0016413,GO:0016740,GO:0016746,GO:0016747,GO:0023052,GO:0030154,GO:0030173,GO:0031090,GO:0031224,GO:0031228,GO:0031300,GO:0031301,GO:0031984,GO:0032502,GO:0043226,GO:0043227,GO:0043229,GO:…	2.3.1.45	ko:K03377	Cas1_AcylT,MFS_1,PC-Esterase,RVP,dUTPase
g62.t1	S	multicellular organism development	CCDC85A	GO:0001558,GO:0003674,GO:0005488,GO:0005515,GO:0005575,GO:0005622,GO:0005623,GO:0005634,GO:0005813,GO:0005815,GO:0005856,GO:0005911,GO:0006355,GO:0007275,GO:0007399,GO:0007417,GO:0007420,GO:0008150,GO:0009889,GO:0009890,GO:0009892,GO:0009987,GO:0010468,GO:0010556,GO:0010558,GO:0010605,GO:0010608,GO:0010629,GO:0015630,GO:0016246,GO:0016441,GO:0016458,GO:0019219,GO:0019222,GO:0021537,GO:0021543,GO:…	-	ko:K16758	CCDC85,PH,adh_short
g63.t1	K	Paired box	PAX1	GO:0000902,GO:0000904,GO:0000976,GO:0000977,GO:0000978,GO:0000981,GO:0000982,GO:0000987,GO:0001012,GO:0001067,GO:0001077,GO:0001228,GO:0001501,GO:0001756,GO:0001775,GO:0002164,GO:0002376,GO:0002520,GO:0002521,GO:0003002,GO:0003674,GO:0003676,GO:0003677,GO:0003690,GO:0003700,GO:0005488,GO:0005575,GO:0005622,GO:0005623,GO:0005634,GO:0005667,GO:0006139,GO:0006351,GO:0006355,GO:0006357,GO:0006366,GO:…	-	ko:K09382	PAX
g238.t1	E	Glutaminase	GLS	GO:0001967,GO:0002087,GO:0003008,GO:0003674,GO:0003824,GO:0004359,GO:0005488,GO:0005515,GO:0005575,GO:0005622,GO:0005623,GO:0005737,GO:0005739,GO:0005759,GO:0005829,GO:0006082,GO:0006520,GO:0006536,GO:0006537,GO:0006541,GO:0006543,GO:0006807,GO:0006810,GO:0006811,GO:0006820,GO:0006835,GO:0006865,GO:0007154,GO:0007267,GO:0007268,GO:0007610,GO:0007631,GO:0008150,GO:0008152,GO:0008652,GO:0009056,GO:…	3.5.1.2	ko:K01425	Ank_2,Ank_4,Glutaminase,Robl_LC7,Tmemb_cc2
g238.t2	E	Glutaminase	GLS	GO:0001967,GO:0002087,GO:0003008,GO:0003674,GO:0003824,GO:0004359,GO:0005488,GO:0005515,GO:0005575,GO:0005622,GO:0005623,GO:0005737,GO:0005739,GO:0005759,GO:0005829,GO:0006082,GO:0006520,GO:0006536,GO:0006537,GO:0006541,GO:0006543,GO:0006807,GO:0006810,GO:0006811,GO:0006820,GO:0006835,GO:0006865,GO:0007154,GO:0007267,GO:0007268,GO:0007610,GO:0007631,GO:0008150,GO:0008152,GO:0008652,GO:0009056,GO:…	3.5.1.2	ko:K01425	Ank_2,Ank_4,Glutaminase,Robl_LC7,Tmemb_cc2
g239.t1	U	Major Facilitator Superfamily	SLC18B1	GO:0003674,GO:0005215,GO:0005575,GO:0005623,GO:0005886,GO:0005887,GO:0006810,GO:0008150,GO:0016020,GO:0016021,GO:0022857,GO:0031224,GO:0031226,GO:0044425,GO:0044459,GO:0044464,GO:0051179,GO:0051234,GO:0055085,GO:0071944	-	-	Calponin,MFS_1,MFS_1_like,Methyltransf_16
g239.t2	U	Major Facilitator Superfamily	SLC18B1	GO:0003674,GO:0005215,GO:0005575,GO:0005623,GO:0005886,GO:0005887,GO:0006810,GO:0008150,GO:0016020,GO:0016021,GO:0022857,GO:0031224,GO:0031226,GO:0044425,GO:0044459,GO:0044464,GO:0051179,GO:0051234,GO:0055085,GO:0071944	-	-	Calponin,MFS_1,MFS_1_like,Methyltransf_16
g240.t1	C	Belongs to the ATP guanido phosphotransferase family	F46H5.3	GO:0003674,GO:0003824,GO:0004054,GO:0006793,GO:0006796,GO:0008150,GO:0008152,GO:0009987,GO:0016301,GO:0016310,GO:0016740,GO:0016772,GO:0016775,GO:0019202,GO:0044237	2.7.3.2,2.7.3.3	ko:K00933,ko:K00934	ATP-gua_Ptrans,ATP-gua_PtransN
g241.t1	S	Tetraspanin family	Tspan18	GO:0005575,GO:0005623,GO:0005886,GO:0005887,GO:0007154,GO:0007165,GO:0007166,GO:0008150,GO:0009987,GO:0016020,GO:0016021,GO:0023052,GO:0031224,GO:0031226,GO:0044425,GO:0044459,GO:0044464,GO:0050789,GO:0050794,GO:0050896,GO:0051716,GO:0065007,GO:0071944	-	ko:K17352,ko:K17353	Tetraspannin
g353.t1	B	MYND finger	Bzd	GO:0003674,GO:0005488,GO:0008270,GO:0043167,GO:0043169,GO:0046872,GO:0046914	-	ko:K11426	SET,TPR_12,zf-MYND
g354.t1	B	MYND finger	Bzd	GO:0003674,GO:0005488,GO:0008270,GO:0043167,GO:0043169,GO:0046872,GO:0046914	-	ko:K11426	SET,TPR_12,zf-MYND
g355.t1	G	N-terminal region of glycosyl transferase group 7	B4GALT7	GO:0000003,GO:0000139,GO:0002009,GO:0002119,GO:0002164,GO:0003674,GO:0003824,GO:0003831,GO:0005488,GO:0005575,GO:0005622,GO:0005623,GO:0005737,GO:0005794,GO:0005795,GO:0006022,GO:0006023,GO:0006024,GO:0006029,GO:0006082,GO:0006464,GO:0006486,GO:0006487,GO:0006491,GO:0006790,GO:0006807,GO:0007275,GO:0007610,GO:0008150,GO:0008152,GO:0008194,GO:0008285,GO:0008378,GO:0009058,GO:0009059,GO:0009100,GO:…	2.4.1.133	ko:K00733	AAA,EMP24_GP25L,Glyco_transf_7C,Glyco_transf_7N,KH_1,Lectin_leg-like,SRPRB
g356.t1	DT	Cyclin-dependent kinase 2-associated protein	CDK2AP1	GO:0001701,GO:0001932,GO:0001934,GO:0003674,GO:0005488,GO:0005515,GO:0005575,GO:0005622,GO:0005623,GO:0005634,GO:0005654,GO:0005737,GO:0005829,GO:0005856,GO:0005874,GO:0006139,GO:0006259,GO:0006260,GO:0006261,GO:0006725,GO:0006807,GO:0007275,GO:0007346,GO:0008150,GO:0008152,GO:0009058,GO:0009059,GO:0009653,GO:0009790,GO:0009792,GO:0009893,GO:0009987,GO:0010171,GO:0010562,GO:0010564,GO:0010604,GO:…	-	-	CDK2AP,DDHD,IP_trans
g758.t1	-	-	-	-	-	-	7TM_GPCR_Srw,DNA_pol_B_2,Rho_N
g759.t1	O	A-macroglobulin receptor	CD109	GO:0000768,GO:0001932,GO:0001933,GO:0001942,GO:0002376,GO:0002520,GO:0002521,GO:0002573,GO:0002576,GO:0003674,GO:0005488,GO:0005515,GO:0005575,GO:0005576,GO:0005615,GO:0005622,GO:0005623,GO:0005737,GO:0005886,GO:0006810,GO:0006887,GO:0006949,GO:0006950,GO:0006952,GO:0007275,GO:0008150,GO:0008285,GO:0008544,GO:0009605,GO:0009607,GO:0009617,GO:0009620,GO:0009653,GO:0009888,GO:0009892,GO:0009966,GO:…	-	ko:K03910,ko:K06530	A2M,A2M_N,A2M_N_2,A2M_comp,A2M_recep,DUF1891,TLV_coat,Thiol-ester_cl,VIR_N
g775.t1	U	DnaJ molecular chaperone homology domain	-	-	-	-	DnaJ
g776.t1	T	to Saccharomyces cerevisiae SSK22 (YCR073C) and SSK2 (YNR031C)	MAP3K4	GO:0000003,GO:0000161,GO:0000165,GO:0000166,GO:0000186,GO:0001672,GO:0001708,GO:0001890,GO:0001932,GO:0001934,GO:0002251,GO:0002376,GO:0002385,GO:0003002,GO:0003006,GO:0003674,GO:0003824,GO:0004672,GO:0004674,GO:0004690,GO:0004691,GO:0004709,GO:0004713,GO:0005488,GO:0005515,GO:0005524,GO:0005575,GO:0005622,GO:0005623,GO:0005737,GO:0006464,GO:0006468,GO:0006793,GO:0006796,GO:0006807,GO:0006810,GO:…	2.7.11.25	ko:K04428,ko:K11230	CCDC142,CHCH,FNIP,MATH,PAS,Pkinase
g1327.t1	T	Growth factor receptor domain IV	ERBB2	GO:0000003,GO:0000079,GO:0000086,GO:0000165,GO:0000186,GO:0000278,GO:0000302,GO:0000578,GO:0000902,GO:0000904,GO:0001042,GO:0001067,GO:0001101,GO:0001503,GO:0001558,GO:0001654,GO:0001655,GO:0001667,GO:0001700,GO:0001701,GO:0001708,GO:0001709,GO:0001736,GO:0001738,GO:0001742,GO:0001745,GO:0001751,GO:0001752,GO:0001754,GO:0001755,GO:0001775,GO:0001889,GO:0001890,GO:0001892,GO:0001894,GO:0001932,GO:…	2.7.10.1	ko:K04361,ko:K05083,ko:K05084,ko:K05085	Furin-like,GF_recep_IV,MFS_1,Peptidase_M24,Pkinase_Tyr,Recep_L_domain,SH2
g1593.t1	E	K02A2.6-like	-	-	-	-	Asp_protease_2,DDE_Tnp_4,DUF1759,HTH_Tnp_4,PHD,PNMA,RVP_2,RVT_1,SCAN,SRCR,Suppressor_APC,TatD_DNase,Zona_pellucida,gag-asp_proteas,rve,zf-CCHC,zf-H2C2
g1597.t1	-	-	-	-	-	-	RNA_helicase
g2308.t1	S	biological adhesion	VWF	GO:0000003,GO:0001101,GO:0001775,GO:0001889,GO:0001890,GO:0002020,GO:0002237,GO:0002576,GO:0003006,GO:0003674,GO:0005102,GO:0005178,GO:0005488,GO:0005515,GO:0005518,GO:0005575,GO:0005576,GO:0005615,GO:0005622,GO:0005623,GO:0005737,GO:0005783,GO:0005886,GO:0006807,GO:0006810,GO:0006887,GO:0006950,GO:0007155,GO:0007275,GO:0007584,GO:0007596,GO:0007597,GO:0007599,GO:0008150,GO:0008152,GO:0009266,GO:…	-	ko:K03900	Anoct_dimer,Anoctamin,C8,CAP,CUE,Cys_knot,GLEYA,TIL,VWA,VWA_N2,VWC,VWD
g2309.t1	-	-	-	-	-	-	-
g2310.t1	Q	ABC transporter transmembrane region	ABCC2	GO:0000003,GO:0000041,GO:0001101,GO:0002119,GO:0002164,GO:0002237,GO:0003008,GO:0003014,GO:0003674,GO:0003824,GO:0005215,GO:0005310,GO:0005342,GO:0005488,GO:0005515,GO:0005575,GO:0005622,GO:0005623,GO:0005737,GO:0005886,GO:0005887,GO:0005903,GO:0005911,GO:0006082,GO:0006790,GO:0006807,GO:0006810,GO:0006811,GO:0006812,GO:0006820,GO:0006835,GO:0006855,GO:0006869,GO:0006873,GO:0006950,GO:0006979,GO:…	-	ko:K02021,ko:K05665,ko:K05666,ko:K05667,ko:K05670	ABC_membrane,ABC_tran,ACC_central,Biotin_carb_C,Biotin_carb_N,Biotin_lipoyl,CPSase_L_D2,Carboxyl_trans,CutC,DDE_3,HECT,MTABC_N
g2356.t1	K	It is involved in the biological process described with regulation of transcription, DNA-templated	EBF2	GO:0000902,GO:0000904,GO:0000976,GO:0000977,GO:0000978,GO:0000981,GO:0000982,GO:0000987,GO:0001012,GO:0001067,GO:0001077,GO:0001228,GO:0001700,GO:0001708,GO:0001709,GO:0002009,GO:0002119,GO:0002164,GO:0002165,GO:0002376,GO:0002682,GO:0003002,GO:0003674,GO:0003676,GO:0003677,GO:0003682,GO:0003690,GO:0003700,GO:0005488,GO:0005515,GO:0005575,GO:0005622,GO:0005623,GO:0005634,GO:0005654,GO:0006139,GO:…	-	ko:K09103	COE1_DBD,COE1_HLH,HMG_box,TIG
g2715.t1	S	DNA- binding	-	-	-	-	Herpes_alk_exo,PIF1,Peptidase_C48,YqaJ
g2717.t1	L	Integrase core domain	-	-	-	-	Baculo_F,Chromo,Pkinase,rve
g2719.t1	L	transposition, RNA-mediated	-	-	-	-	Baculo_F,Chromo,Pkinase,rve
g2720.t1	L	transposition, RNA-mediated	-	-	-	-	Baculo_F,Chromo,Pkinase,rve
g2721.t1	S	oxidation-reduction process	-	-	-	-	Exo_endo_phos_2,Herpes_teg_N
g3088.t1	S	oxidation-reduction process	-	-	-	-	Exo_endo_phos_2,Herpes_teg_N
g3090.t1	S	Domain of unknown function (DUF1768)	-	-	-	ko:K09935	DUF1768,Macro
g3092.t1	-	-	-	-	-	-	Tnp_zf-ribbon_2
g3093.t1	L	Integrase core domain	-	-	-	-	Baculo_F,Chromo,Pkinase,rve
g3239.t1	L	Integrase core domain	-	-	-	-	Baculo_F,Chromo,Pkinase,rve
g3240.t1	L	Integrase core domain	-	-	-	-	Baculo_F,Chromo,Pkinase,rve
g3242.t1	-	-	-	-	-	-	7tm_1
g3853.t1	T	MAP kinase activity	MAPK1	GO:0000003,GO:0000165,GO:0000166,GO:0000187,GO:0000278,GO:0000302,GO:0000323,GO:0000746,GO:0000747,GO:0000749,GO:0000750,GO:0000902,GO:0000904,GO:0001402,GO:0001403,GO:0001501,GO:0001556,GO:0001568,GO:0001654,GO:0001676,GO:0001701,GO:0001745,GO:0001751,GO:0001752,GO:0001754,GO:0001775,GO:0001784,GO:0001817,GO:0001819,GO:0001890,GO:0001892,GO:0001932,GO:0001933,GO:0001934,GO:0001944,GO:0002009,GO:…	2.7.11.24,3.1.4.39	ko:K04371,ko:K04464,ko:K22387	GDPD,Pkinase
g4351.t1	-	-	-	-	-	-	7TM_GPCR_Srw,DNA_pol_B_2
g4655.t1	L	genomic stop codons	-	-	-	-	Gag_MA,Gag_p30,Galactosyl_T,RNase_H,RVP,RVP_2,RVT_1,Retrotrans_gag,SCAN,V-set,gag-asp_proteas,rve,zf-CCHC,zf-H2C2
g4853.t1	E	K02A2.6-like	-	-	-	-	Asp_protease_2,DDE_Tnp_4,DUF1759,HTH_Tnp_4,PHD,PNMA,RVP_2,RVT_1,SCAN,SRCR,Suppressor_APC,TatD_DNase,Zona_pellucida,gag-asp_proteas,rve,zf-CCHC,zf-H2C2
g4943.t1	-	-	-	-	-	-	7TM_GPCR_Srw,DNA_pol_B_2
g4962.t1	O	K02A2.6-like	-	-	-	-	7TM_GPCR_Srx,AT_hook,Asp_protease_2,Baculo_F,GatB_N,Glycoprotein_B,LMF1,RNase_H,RVP,RVP_2,RVT_1,RVT_3,Retrotrans_gag,SAP,gag-asp_proteas,rve,zf-CCHC,zf-CCHC_3,zf-H2C2,zf-RVT
g5018.t1	E	prolyl 4-hydroxylase	P4HA2	GO:0000003,GO:0003674,GO:0003824,GO:0004656,GO:0005575,GO:0005576,GO:0005615,GO:0005622,GO:0005623,GO:0005634,GO:0005654,GO:0005737,GO:0005783,GO:0005788,GO:0005829,GO:0006082,GO:0006091,GO:0006464,GO:0006520,GO:0006575,GO:0006807,GO:0006928,GO:0007154,GO:0007267,GO:0007275,GO:0007431,GO:0007435,GO:0008150,GO:0008152,GO:0009055,GO:0009653,GO:0009790,GO:0009792,GO:0009887,GO:0009987,GO:0010171,GO:…	1.14.11.2	ko:K00472	2OG-FeII_Oxy,2OG-FeII_Oxy_3,DBB,Fungal_trans,Mito_carr,P4Ha_N,TPR_2,Trypsin,Zn_clus
g5213.t1	-	-	-	-	-	-	7TM_GPCR_Srw,DNA_pol_B_2
g5246.t1	S	oxidation-reduction process	-	-	-	-	Exo_endo_phos_2,Herpes_teg_N
g5507.t1	L	Integrase core domain	-	-	-	-	Baculo_F,Chromo,Pkinase,rve
g5508.t1	L	transposition, RNA-mediated	-	-	-	-	Baculo_F,Chromo,Pkinase,rve
g5509.t1	S	oxidation-reduction process	-	-	-	-	Exo_endo_phos_2,Herpes_teg_N
g5542.t1	O	K02A2.6-like	-	-	-	-	7TM_GPCR_Srx,AT_hook,Asp_protease_2,Baculo_F,GatB_N,Glycoprotein_B,LMF1,RNase_H,RVP,RVP_2,RVT_1,RVT_3,Retrotrans_gag,SAP,gag-asp_proteas,rve,zf-CCHC,zf-CCHC_3,zf-H2C2,zf-RVT
g5708.t1	-	-	-	-	-	-	7TM_GPCR_Srw,DNA_pol_B_2,Rho_N
g5995.t1	K	Zinc finger, C2H2 type	PRDM10	GO:0000981,GO:0003674,GO:0003700,GO:0006355,GO:0006357,GO:0008150,GO:0009889,GO:0010468,GO:0010556,GO:0019219,GO:0019222,GO:0031323,GO:0031326,GO:0050789,GO:0050794,GO:0051171,GO:0051252,GO:0060255,GO:0065007,GO:0080090,GO:0140110,GO:1903506,GO:2000112,GO:2001141	-	-	DDE_Tnp_1_7,Tristanin_u2,zf-C2H2,zf-C2H2_4,zf-C2H2_6,zf-met
g6195.t1	L	Integrase core domain	-	-	-	-	Baculo_F,Chromo,Pkinase,rve
g6899.t1	BD	Putative DNA-binding domain in centromere protein B, mouse jerky and transposases.	-	-	-	-	CENP-B_N,DDE_1,DDE_Tnp_4,DUF4371,Dimer_Tnp_hAT,HTH_Tnp_Tc5,MADF_DNA_bdg
g6955.t1	L	transposition, RNA-mediated	-	-	-	-	Baculo_F,Chromo,Pkinase,rve
g7442.t1	L	K02A2.6-like	-	-	-	-	Asp_protease,Asp_protease_2,PNMA,RVP,RVP_2,RVT_1,RVT_3,Retrotrans_gag,SCAN,gag-asp_proteas,rve,zf-CCHC,zf-H2C2,zf-RVT
g7854.t1	S	oxidation-reduction process	-	-	-	-	Exo_endo_phos_2,Herpes_teg_N
g8039.t1	E	K02A2.6-like	-	-	-	-	Asp_protease_2,DDE_Tnp_4,DUF1759,HTH_Tnp_4,PHD,PNMA,RVP_2,RVT_1,SCAN,SRCR,Suppressor_APC,TatD_DNase,Zona_pellucida,gag-asp_proteas,rve,zf-CCHC,zf-H2C2
g8230.t1	L	transposition, RNA-mediated	-	-	-	-	Baculo_F,Chromo,Pkinase,rve
g9604.t1	L	Reverse transcriptase (RNA-dependent DNA polymerase)	-	-	-	-	Asp_protease_2,Baculo_F,RVP,RVT_1,Retrotrans_gag,SAP,gag-asp_proteas,rve,zf-CCHC,zf-CCHC_3,zf-H2C2
g9854.t1	S	oxidation-reduction process	-	-	-	-	Exo_endo_phos_2,Herpes_teg_N
g10155.t1	-	-	-	-	-	-	zf-CCHC
g10258.t1	-	-	-	-	-	-	7TM_GPCR_Srw,DNA_pol_B_2,Rho_N
g10964.t1	-	-	-	-	-	-	7TM_GPCR_Srw,DNA_pol_B_2,Rho_N
g11556.t1	-	-	-	-	-	-	RNA_helicase
g12587.t1	-	-	-	-	-	-	7TM_GPCR_Srw,DNA_pol_B_2
g12925.t1	-	-	-	-	-	-	RNA_helicase
g12977.t1	L	transposition, RNA-mediated	-	-	-	-	Chromo,rve
g13028.t1	-	-	-	-	-	-	7TM_GPCR_Srw,DNA_pol_B_2
g13037.t1	L	Reverse transcriptase (RNA-dependent DNA polymerase)	-	-	-	-	Asp_protease,Asp_protease_2,Chromo,PHD,RVP,RVP_2,RVT_1,RVT_2,Retrotrans_gag,SCAN,gag-asp_proteas,gag_pre-integrs,rve,zf-CCHC,zf-H2C2
g13272.t1	-	-	-	-	-	-	7TM_GPCR_Srw,DNA_pol_B_2,Rho_N
g13274.t1	-	-	-	-	-	-	7TM_GPCR_Srw,DNA_pol_B_2,Rho_N
g13688.t1	E	K02A2.6-like	-	-	-	-	Asp_protease_2,DDE_Tnp_4,DUF1759,HTH_Tnp_4,PHD,RVP_2,RVT_1,SCAN,SRCR,Suppressor_APC,TatD_DNase,gag-asp_proteas,rve,zf-CCHC,zf-H2C2
g13754.t1	-	-	-	-	-	-	7TM_GPCR_Srw,DNA_pol_B_2,Rho_N
g13972.t1	-	-	-	-	-	-	7TM_GPCR_Srw,DNA_pol_B_2
g14054.t1	L	Integrase core domain	-	-	-	-	Baculo_F,Chromo,Pkinase,rve
g14490.t1	L	K02A2.6-like	-	-	-	-	7TM_GPCR_Srx,Asp_protease_2,Baculo_F,Chromo,Glycoprotein_B,LMF1,RVP,RVT_1,RVT_3,Retrotrans_gag,gag-asp_proteas,rve,zf-CCHC,zf-H2C2
g14868.t1	L	K02A2.6-like	-	-	-	-	Asp_protease,Asp_protease_2,BIR,PHD,RVP,RVT_1,RVT_2,Retrotrans_gag,SCAN,gag-asp_proteas,gag_pre-integrs,rve,zf-CCHC,zf-H2C2
g15219.t1	L	transposition, RNA-mediated	-	-	-	-	rve
g15279.t1	L	Integrase core domain	-	-	-	-	Chromo,rve
g15743.t1	-	-	-	-	-	-	7TM_GPCR_Srw,DNA_pol_B_2,Rho_N
g11811.t1	L	K02A2.6-like	-	-	-	-	AAA_12,Asp_protease_2,RVP,RVT_1,Retrotrans_gag,dUTPase,gag-asp_proteas,rve,zf-CCHC,zf-H2C2
g11812.t1	L	Reverse transcriptase (RNA-dependent DNA polymerase)	-	-	-	-	Asp_protease_2,Baculo_F,RVP,RVT_1,Retrotrans_gag,SAP,gag-asp_proteas,rve,zf-CCHC,zf-CCHC_3,zf-H2C2
g11813.t1	E	K02A2.6-like	-	-	-	-	Asp_protease_2,DDE_Tnp_4,DUF1759,HTH_Tnp_4,PHD,PNMA,RVP_2,RVT_1,SCAN,SRCR,Suppressor_APC,TatD_DNase,Zona_pellucida,gag-asp_proteas,rve,zf-CCHC,zf-H2C2
g11814.t1	L	transposition, RNA-mediated	-	-	-	-	-
g11819.t1	I	C-4 methylsterol oxidase activity	MSMO1	GO:0000003,GO:0000254,GO:0003006,GO:0003674,GO:0003824,GO:0004497,GO:0005488,GO:0005506,GO:0005575,GO:0005622,GO:0005623,GO:0005737,GO:0005783,GO:0005789,GO:0005886,GO:0006066,GO:0006082,GO:0006629,GO:0006631,GO:0006694,GO:0006695,GO:0006696,GO:0007275,GO:0008150,GO:0008152,GO:0008202,GO:0008203,GO:0008204,GO:0008610,GO:0009058,GO:0009507,GO:0009526,GO:0009536,GO:0009790,GO:0009791,GO:0009793,GO:…	1.14.18.9	ko:K07750,ko:K14424,ko:K22282	Acyl_transf_1,Agenet,DUF1729,F-box,FA_hydroxylase,LRR_2,MaoC_dehydrat_N,MaoC_dehydratas,Ras,Roc,SAT,adh_short
g11821.t1	CG	Belongs to the UDP-glycosyltransferase family	-	GO:0000302,GO:0001101,GO:0003674,GO:0003824,GO:0005575,GO:0005622,GO:0005623,GO:0006082,GO:0006725,GO:0006807,GO:0006950,GO:0006970,GO:0006972,GO:0006979,GO:0007154,GO:0007275,GO:0008150,GO:0008152,GO:0008194,GO:0009414,GO:0009415,GO:0009605,GO:0009628,GO:0009636,GO:0009651,GO:0009653,GO:0009719,GO:0009725,GO:0009737,GO:0009850,GO:0009987,GO:0009991,GO:0010016,GO:0010033,GO:0010035,GO:0010817,GO:…	2.4.1.350	ko:K13691,ko:K22426	UDPGT
g11823.t1	DO	Myosin-binding striated muscle assembly central	UNC45A	GO:0000003,GO:0001654,GO:0002088,GO:0003674,GO:0005488,GO:0005515,GO:0005575,GO:0005622,GO:0005623,GO:0005634,GO:0005654,GO:0005737,GO:0005794,GO:0005829,GO:0005886,GO:0005938,GO:0006457,GO:0006950,GO:0006996,GO:0007010,GO:0007275,GO:0007423,GO:0007507,GO:0007517,GO:0007519,GO:0007525,GO:0007610,GO:0008150,GO:0009266,GO:0009408,GO:0009628,GO:0009653,GO:0009790,GO:0009792,GO:0009888,GO:0009987,GO:…	-	ko:K21991	Arm,RCC1,S8_pro-domain,TPR_1,TPR_16,TPR_2,TPR_8,UNC45-central,zf-C2H2
g11824.t1	C	oxygen carrier activity	HBQ1	-	-	ko:K13822,ko:K13827,ko:K21893,ko:K21894	Globin
g11825.t1	G	O-fucosylpeptide 3-beta-N-acetylglucosaminyltransferase activity	MFNG	GO:0000003,GO:0000139,GO:0001541,GO:0001654,GO:0001708,GO:0001745,GO:0001756,GO:0001775,GO:0002009,GO:0002165,GO:0002252,GO:0002263,GO:0002285,GO:0002312,GO:0002313,GO:0002315,GO:0002335,GO:0002366,GO:0002376,GO:0002520,GO:0002521,GO:0003002,GO:0003006,GO:0003674,GO:0003824,GO:0005575,GO:0005576,GO:0005615,GO:0005622,GO:0005623,GO:0005737,GO:0005783,GO:0005794,GO:0005795,GO:0005797,GO:0005975,GO:…	2.4.1.222	ko:K05948	DUF3835,Fringe
g11827.t1	Q	heme binding. It is involved in the biological process described with oxidation-reduction process	CYP2U1	GO:0000003,GO:0001676,GO:0002009,GO:0002064,GO:0002065,GO:0002066,GO:0002119,GO:0002164,GO:0002165,GO:0003006,GO:0003674,GO:0003824,GO:0004497,GO:0005575,GO:0005622,GO:0005623,GO:0005634,GO:0005737,GO:0005783,GO:0005789,GO:0006082,GO:0006629,GO:0006631,GO:0006690,GO:0006706,GO:0006714,GO:0006716,GO:0006718,GO:0006720,GO:0006721,GO:0007154,GO:0007267,GO:0007275,GO:0007276,GO:0007281,GO:0007292,GO:…	1.14.13.202,1.14.13.203,1.14.14.1,1.14.14.24	ko:K07414,ko:K07418,ko:K07419,ko:K07422,ko:K14772,ko:K14937,ko:K14985,ko:K17855,ko:K17946,ko:K17955,ko:K17956,ko:K17957,ko:K17958	Chromo,DDE_3,DRIM,Ephrin_rec_like,FTH,HTH_Tnp_Tc3_2,NPDC1,PAP2_C,p450,zf-AD,zf-C2H2
g11828.t1	Q	Cytochrome P450, family 2, subfamily AA, polypeptide	-	-	1.14.14.1	ko:K07417,ko:K07418,ko:K07422,ko:K17852,ko:K17854,ko:K17858	p450
g11829.t1	Q	Cytochrome P450, family 2, subfamily AA, polypeptide	-	-	1.14.14.1	ko:K07417,ko:K07418,ko:K07422,ko:K17852,ko:K17854,ko:K17858	p450
g11830.t1	G	Belongs to the glycosyl hydrolase 31 family	MGAM	GO:0000272,GO:0001775,GO:0002252,GO:0002263,GO:0002274,GO:0002275,GO:0002283,GO:0002366,GO:0002376,GO:0002443,GO:0002444,GO:0002446,GO:0003674,GO:0003824,GO:0004553,GO:0004558,GO:0005575,GO:0005622,GO:0005623,GO:0005737,GO:0005886,GO:0005975,GO:0005976,GO:0005982,GO:0005983,GO:0006073,GO:0006810,GO:0006887,GO:0006955,GO:0007586,GO:0008150,GO:0008152,GO:0008422,GO:0009056,GO:0009057,GO:0009251,GO:…	3.2.1.10,3.2.1.20,3.2.1.3,3.2.1.48	ko:K01187,ko:K01203,ko:K12047,ko:K12316	CBM_20,DUF5110,Gal_mutarotas_2,Glyco_hydro_31,Hairy_orange,NtCtMGAM_N,Trefoil,Trypsin
g11831.t1	T	Belongs to the G-protein coupled receptor 1 family	OPRL1	GO:0000003,GO:0001626,GO:0001653,GO:0003008,GO:0003013,GO:0003014,GO:0003674,GO:0004888,GO:0004930,GO:0004985,GO:0005488,GO:0005515,GO:0005575,GO:0005623,GO:0005886,GO:0005887,GO:0006873,GO:0006874,GO:0006875,GO:0007154,GO:0007165,GO:0007186,GO:0007187,GO:0007188,GO:0007193,GO:0007200,GO:0007204,GO:0007218,GO:0007267,GO:0007268,GO:0007600,GO:0007610,GO:0007631,GO:0008015,GO:0008022,GO:0008150,GO:…	-	ko:K04009,ko:K04216,ko:K04218,ko:K04220	7tm_1
g11835.t1	T	Neural ectodermal development factor	ImpL2	GO:0003674,GO:0005488,GO:0005515,GO:0005520,GO:0005575,GO:0005576,GO:0005615,GO:0006950,GO:0007275,GO:0007399,GO:0007568,GO:0008150,GO:0008340,GO:0009605,GO:0009966,GO:0009967,GO:0009968,GO:0009987,GO:0009991,GO:0010259,GO:0010646,GO:0010647,GO:0010648,GO:0010883,GO:0010888,GO:0014066,GO:0014067,GO:0017046,GO:0019838,GO:0022008,GO:0022611,GO:0023051,GO:0023056,GO:0023057,GO:0030154,GO:0030182,GO:…	-	-	C2-set_2,I-set,Ig_3,V-set,ig
g11836.t1	J	translation initiation factor activity	EIF3M	GO:0000003,GO:0001732,GO:0002020,GO:0002181,GO:0002183,GO:0002790,GO:0003006,GO:0003674,GO:0005488,GO:0005515,GO:0005575,GO:0005622,GO:0005623,GO:0005737,GO:0005794,GO:0005829,GO:0005852,GO:0005856,GO:0006412,GO:0006413,GO:0006508,GO:0006518,GO:0006807,GO:0006810,GO:0006996,GO:0007030,GO:0007275,GO:0007276,GO:0007281,GO:0007283,GO:0007286,GO:0007291,GO:0007349,GO:0008104,GO:0008150,GO:0008152,GO:…	-	ko:K15030	F-box,LRRNT_2,LRR_1,LRR_8,PCI,Pkinase,RRS1,RVT_1
g11837.t1	J	Binds to the 60S ribosomal subunit and prevents its association with the 40S ribosomal subunit to form the 80S initiation complex in the cytoplasm. Is also involved in ribosome biogenesis. Associates with pre-60S subunits in the nucleus and is involved in its nuclear export	EIF6	GO:0000003,GO:0000054,GO:0000460,GO:0000463,GO:0000466,GO:0000470,GO:0001101,GO:0002682,GO:0003006,GO:0003674,GO:0003676,GO:0003723,GO:0003743,GO:0005488,GO:0005575,GO:0005622,GO:0005623,GO:0005634,GO:0005638,GO:0005652,GO:0005654,GO:0005730,GO:0005737,GO:0005829,GO:0005856,GO:0005882,GO:0006109,GO:0006110,GO:0006139,GO:0006140,GO:0006364,GO:0006396,GO:0006403,GO:0006405,GO:0006412,GO:0006413,GO:…	-	ko:K03264,ko:K03440	ASC,Helicase_C,Myosin_head,SE,Thioredoxin,eIF-6
g11839.t1	B	Chromobox protein homolog	CBX3	-	2.3.1.48	ko:K00653,ko:K11585,ko:K11586,ko:K11587,ko:K13539,ko:K21871	Ank_2,Chromo,Chromo_shadow,ECH_1,Peptidase_M8
g11840.t1	I	Belongs to the thiolase family	HADHB	GO:0000062,GO:0000166,GO:0003674,GO:0003824,GO:0003857,GO:0003988,GO:0004300,GO:0005488,GO:0005575,GO:0005622,GO:0005623,GO:0005737,GO:0005739,GO:0005740,GO:0005741,GO:0005743,GO:0005759,GO:0005783,GO:0006082,GO:0006629,GO:0006631,GO:0006635,GO:0007275,GO:0007568,GO:0008150,GO:0008152,GO:0008340,GO:0009056,GO:0009062,GO:0009295,GO:0009987,GO:0010259,GO:0012505,GO:0016020,GO:0016042,GO:0016054,GO:…	2.3.1.16	ko:K07509	Thiolase_C,Thiolase_N,WD40,zf-RING_2
g11845.t1	T	melatonin receptor activity	MTNR1A	GO:0000003,GO:0001654,GO:0002791,GO:0002792,GO:0003008,GO:0003013,GO:0003018,GO:0003674,GO:0004888,GO:0004930,GO:0005488,GO:0005575,GO:0005623,GO:0005886,GO:0005887,GO:0006109,GO:0006110,GO:0006140,GO:0006873,GO:0006874,GO:0006875,GO:0007154,GO:0007165,GO:0007186,GO:0007187,GO:0007188,GO:0007193,GO:0007267,GO:0007268,GO:0007275,GO:0007423,GO:0007568,GO:0007610,GO:0007617,GO:0007618,GO:0007623,GO:…	-	ko:K04160,ko:K04250,ko:K04255,ko:K04256,ko:K04285,ko:K04286,ko:K08409,ko:K08421,ko:K18627	7tm_1,ATG27,Kinesin
g11846.t1	-	-	-	-	-	-	HTH_Tnp_Tc5
g11848.t1	S	RNA splicing	WDR83	GO:0000165,GO:0000375,GO:0000377,GO:0000398,GO:0003674,GO:0005198,GO:0005488,GO:0005515,GO:0005575,GO:0005622,GO:0005623,GO:0005634,GO:0005681,GO:0005737,GO:0005768,GO:0006139,GO:0006396,GO:0006397,GO:0006464,GO:0006468,GO:0006725,GO:0006793,GO:0006796,GO:0006807,GO:0007154,GO:0007165,GO:0008150,GO:0008152,GO:0008380,GO:0009987,GO:0010008,GO:0010467,GO:0012505,GO:0016020,GO:0016070,GO:0016071,GO:…	-	ko:K13124	ANAPC4_WD40,WD40,zf-CCCH
g11848.t2	S	RNA splicing	WDR83	GO:0000165,GO:0000375,GO:0000377,GO:0000398,GO:0003674,GO:0005198,GO:0005488,GO:0005515,GO:0005575,GO:0005622,GO:0005623,GO:0005634,GO:0005681,GO:0005737,GO:0005768,GO:0006139,GO:0006396,GO:0006397,GO:0006464,GO:0006468,GO:0006725,GO:0006793,GO:0006796,GO:0006807,GO:0007154,GO:0007165,GO:0008150,GO:0008152,GO:0008380,GO:0009987,GO:0010008,GO:0010467,GO:0012505,GO:0016020,GO:0016070,GO:0016071,GO:…	-	ko:K13124	ANAPC4_WD40,WD40,zf-CCCH
g11849.t1	U	It is involved in the biological process described with intracellular protein transport	NAPG	GO:0000149,GO:0001505,GO:0003002,GO:0003674,GO:0005483,GO:0005488,GO:0005515,GO:0005575,GO:0005622,GO:0005623,GO:0005737,GO:0005739,GO:0005773,GO:0005774,GO:0005886,GO:0006810,GO:0006836,GO:0006886,GO:0006887,GO:0006891,GO:0007154,GO:0007267,GO:0007268,GO:0007269,GO:0007275,GO:0007389,GO:0007444,GO:0007447,GO:0007450,GO:0008104,GO:0008150,GO:0009888,GO:0009953,GO:0009987,GO:0015031,GO:0015833,GO:…	-	ko:K21198	DOR,KH_1,Microtub_bd,PapD-like,SNAP
g11850.t1	T	Domain first found in C1r, C1s, uEGF, and bone morphogenetic protein.	NETO2	GO:0003674,GO:0005102,GO:0005488,GO:0005515,GO:0005575,GO:0005623,GO:0005886,GO:0014069,GO:0016020,GO:0032279,GO:0035254,GO:0035255,GO:0043226,GO:0044456,GO:0044464,GO:0045202,GO:0071944,GO:0097458,GO:0098794,GO:0098984,GO:0099572	-	-	CUB,Ldl_recept_a
g11852.t1	S	chitin binding. It is involved in the biological process described with chitin metabolic process	-	-	-	-	CBM_14
g11853.t1	T	Neural ectodermal development factor	ImpL2	GO:0003674,GO:0005488,GO:0005515,GO:0005520,GO:0005575,GO:0005576,GO:0005615,GO:0006950,GO:0007275,GO:0007399,GO:0007568,GO:0008150,GO:0008340,GO:0009605,GO:0009966,GO:0009967,GO:0009968,GO:0009987,GO:0009991,GO:0010259,GO:0010646,GO:0010647,GO:0010648,GO:0010883,GO:0010888,GO:0014066,GO:0014067,GO:0017046,GO:0019838,GO:0022008,GO:0022611,GO:0023051,GO:0023056,GO:0023057,GO:0030154,GO:0030182,GO:…	-	-	C2-set_2,I-set,Ig_3,V-set,ig
g11854.t1	O	zinc ion binding. It is involved in the biological process described with proteolysis	-	GO:0000003,GO:0003674,GO:0003824,GO:0004177,GO:0005488,GO:0005575,GO:0005576,GO:0005622,GO:0005623,GO:0005737,GO:0006508,GO:0006518,GO:0006807,GO:0008150,GO:0008152,GO:0008233,GO:0008235,GO:0008237,GO:0008238,GO:0008270,GO:0009056,GO:0009987,GO:0016787,GO:0019538,GO:0032501,GO:0032504,GO:0033218,GO:0034641,GO:0042277,GO:0043167,GO:0043169,GO:0043170,GO:0043171,GO:0043603,GO:0044237,GO:0044238,GO:…	3.4.11.2	ko:K11140	ERAP1_C,Peptidase_M1
g11855.t1	Z	Talin, middle domain	TLN1	GO:0000003,GO:0001667,GO:0001700,GO:0001708,GO:0001726,GO:0001786,GO:0001894,GO:0002009,GO:0002064,GO:0002065,GO:0002066,GO:0002119,GO:0002164,GO:0002165,GO:0002576,GO:0003006,GO:0003008,GO:0003012,GO:0003674,GO:0003779,GO:0005102,GO:0005178,GO:0005198,GO:0005200,GO:0005488,GO:0005515,GO:0005543,GO:0005575,GO:0005576,GO:0005604,GO:0005605,GO:0005622,GO:0005623,GO:0005737,GO:0005829,GO:0005886,GO:…	-	ko:K06271	FERM_M,FERM_N,FERM_f0,IRS,I_LWEQ,Pkinase_Tyr,SH2,Talin_middle,Tyr_Deacylase,VBS
g782.t1	C	Zinc-binding dehydrogenase	CRYZ	GO:0000166,GO:0003008,GO:0003674,GO:0003676,GO:0003723,GO:0003729,GO:0003730,GO:0003824,GO:0003960,GO:0005198,GO:0005212,GO:0005488,GO:0005575,GO:0005622,GO:0005623,GO:0005737,GO:0005829,GO:0006805,GO:0007600,GO:0007601,GO:0008150,GO:0008152,GO:0009056,GO:0009410,GO:0009987,GO:0016043,GO:0016491,GO:0016651,GO:0016655,GO:0022607,GO:0032501,GO:0036094,GO:0042178,GO:0042221,GO:0043167,GO:0043168,GO:…	1.6.5.5	ko:K00344	ADH_N,ADH_zinc_N,ADH_zinc_N_2,Trypsin
g784.t1	C	Zinc-binding dehydrogenase	CRYZ	GO:0000166,GO:0003008,GO:0003674,GO:0003676,GO:0003723,GO:0003729,GO:0003730,GO:0003824,GO:0003960,GO:0005198,GO:0005212,GO:0005488,GO:0005575,GO:0005622,GO:0005623,GO:0005737,GO:0005829,GO:0006805,GO:0007600,GO:0007601,GO:0008150,GO:0008152,GO:0009056,GO:0009410,GO:0009987,GO:0016043,GO:0016491,GO:0016651,GO:0016655,GO:0022607,GO:0032501,GO:0036094,GO:0042178,GO:0042221,GO:0043167,GO:0043168,GO:…	1.6.5.5	ko:K00344	ADH_N,ADH_zinc_N,ADH_zinc_N_2,Trypsin
g786.t1	DZ	Doublecortin domain-containing protein 2C	DCDC2C	GO:0005575,GO:0005622,GO:0005623,GO:0005737,GO:0005929,GO:0031514,GO:0036126,GO:0042995,GO:0043226,GO:0044424,GO:0044464,GO:0097223,GO:0097729,GO:0120025	-	-	Allantoicase,DCX
g789.t1	S	Impact RWD domain protein	IMPACT	GO:0000122,GO:0000302,GO:0000902,GO:0001932,GO:0001933,GO:0003674,GO:0003779,GO:0003785,GO:0004857,GO:0004860,GO:0005488,GO:0005515,GO:0005575,GO:0005622,GO:0005623,GO:0005634,GO:0005737,GO:0005844,GO:0006355,GO:0006357,GO:0006417,GO:0006446,GO:0006469,GO:0006950,GO:0006979,GO:0007154,GO:0007275,GO:0007399,GO:0008092,GO:0008150,GO:0009267,GO:0009268,GO:0009314,GO:0009411,GO:0009416,GO:0009605,GO:…	1.2.1.16,1.2.1.20,1.2.1.79,3.5.3.1	ko:K00135,ko:K01476	ATP-synt_ab,ATP-synt_ab_N,ATP-synt_ab_Xtn,Aldedh,Aminotran_1_2,Arginase,RWD,UPF0029
g790.t1	-	-	-	-	-	-	-
g791.t1	I	fatty acid elongation, polyunsaturated fatty acid	ELOVL5	GO:0000038,GO:0001676,GO:0003674,GO:0003824,GO:0004312,GO:0005575,GO:0005622,GO:0005623,GO:0005737,GO:0005783,GO:0005789,GO:0006082,GO:0006139,GO:0006163,GO:0006164,GO:0006629,GO:0006631,GO:0006633,GO:0006637,GO:0006643,GO:0006665,GO:0006725,GO:0006732,GO:0006753,GO:0006790,GO:0006793,GO:0006796,GO:0006807,GO:0008150,GO:0008152,GO:0008610,GO:0009058,GO:0009108,GO:0009117,GO:0009150,GO:0009152,GO:…	2.3.1.199	ko:K10205,ko:K10244,ko:K10249	ELO
g792.t1	I	fatty acid elongation, polyunsaturated fatty acid	ELOVL5	GO:0000038,GO:0001676,GO:0003674,GO:0003824,GO:0004312,GO:0005575,GO:0005622,GO:0005623,GO:0005737,GO:0005783,GO:0005789,GO:0006082,GO:0006139,GO:0006163,GO:0006164,GO:0006629,GO:0006631,GO:0006633,GO:0006637,GO:0006643,GO:0006665,GO:0006725,GO:0006732,GO:0006753,GO:0006790,GO:0006793,GO:0006796,GO:0006807,GO:0008150,GO:0008152,GO:0008610,GO:0009058,GO:0009108,GO:0009117,GO:0009150,GO:0009152,GO:…	2.3.1.199	ko:K10205,ko:K10244,ko:K10249	ELO
g792.t2	I	fatty acid elongation, polyunsaturated fatty acid	ELOVL5	GO:0000038,GO:0001676,GO:0003674,GO:0003824,GO:0004312,GO:0005575,GO:0005622,GO:0005623,GO:0005737,GO:0005783,GO:0005789,GO:0006082,GO:0006139,GO:0006163,GO:0006164,GO:0006629,GO:0006631,GO:0006633,GO:0006637,GO:0006643,GO:0006665,GO:0006725,GO:0006732,GO:0006753,GO:0006790,GO:0006793,GO:0006796,GO:0006807,GO:0008150,GO:0008152,GO:0008610,GO:0009058,GO:0009108,GO:0009117,GO:0009150,GO:0009152,GO:…	2.3.1.199	ko:K10205,ko:K10244,ko:K10249	ELO
g793.t1	I	Elongation of very long chain fatty acids protein	ELOVL4	GO:0000038,GO:0001676,GO:0003674,GO:0003824,GO:0004312,GO:0004888,GO:0004930,GO:0005575,GO:0005622,GO:0005623,GO:0005737,GO:0005783,GO:0005789,GO:0006082,GO:0006629,GO:0006631,GO:0006633,GO:0006643,GO:0006665,GO:0006807,GO:0007154,GO:0007165,GO:0007186,GO:0008020,GO:0008150,GO:0008152,GO:0008610,GO:0009058,GO:0009314,GO:0009416,GO:0009581,GO:0009582,GO:0009583,GO:0009584,GO:0009605,GO:0009628,GO:…	2.3.1.199	ko:K10249	ELO
g794.t1	J	structural constituent of ribosome	RPS12	GO:0000184,GO:0000956,GO:0002181,GO:0003674,GO:0003735,GO:0005198,GO:0005575,GO:0005622,GO:0005623,GO:0005634,GO:0005654,GO:0005737,GO:0005794,GO:0005829,GO:0005840,GO:0006139,GO:0006401,GO:0006402,GO:0006412,GO:0006413,GO:0006518,GO:0006605,GO:0006612,GO:0006613,GO:0006614,GO:0006725,GO:0006807,GO:0006810,GO:0006886,GO:0008104,GO:0008150,GO:0008152,GO:0009056,GO:0009057,GO:0009058,GO:0009059,GO:…	-	ko:K02951	Ribosomal_L7Ae,Steroid_dh
g795.t1	A	helicase superfamily c-terminal domain	DDX23	GO:0000003,GO:0000245,GO:0000354,GO:0000375,GO:0000377,GO:0000384,GO:0000395,GO:0000398,GO:0002119,GO:0002164,GO:0002682,GO:0002697,GO:0002831,GO:0003006,GO:0003674,GO:0003676,GO:0003723,GO:0003724,GO:0003824,GO:0004004,GO:0004386,GO:0005488,GO:0005575,GO:0005622,GO:0005623,GO:0005634,GO:0005654,GO:0005681,GO:0005682,GO:0005730,GO:0005737,GO:0006139,GO:0006376,GO:0006396,GO:0006397,GO:0006725,GO:…	3.6.4.13	ko:K12858	DEAD,DUF2986,DUF953,Helicase_C,Ubiq_cyt_C_chap
g797.t1	O	Trypsin-like peptidase domain	PRSS56	GO:0001654,GO:0003674,GO:0003824,GO:0004175,GO:0004252,GO:0005575,GO:0005622,GO:0005623,GO:0005737,GO:0005783,GO:0006508,GO:0006807,GO:0007275,GO:0007423,GO:0008150,GO:0008152,GO:0008233,GO:0008236,GO:0012505,GO:0016787,GO:0017171,GO:0019538,GO:0032501,GO:0032502,GO:0043010,GO:0043170,GO:0043226,GO:0043227,GO:0043229,GO:0043231,GO:0044238,GO:0044424,GO:0044444,GO:0044464,GO:0048513,GO:0048731,GO:…	3.4.21.1	ko:K01310,ko:K09640	TSP_1,Trypsin
g798.t1	O	serine-type endopeptidase activity. It is involved in the biological process described with proteolysis	-	-	-	ko:K01362,ko:K09640	CLIP,Trypsin
g799.t1	O	Domain of unknown function (DUF1986)	-	-	-	ko:K09628	Trypsin
g800.t1	S	paraoxonase	PON2	GO:0000323,GO:0003674,GO:0003824,GO:0004064,GO:0005488,GO:0005515,GO:0005575,GO:0005576,GO:0005622,GO:0005623,GO:0005634,GO:0005737,GO:0005739,GO:0005764,GO:0005773,GO:0005886,GO:0006082,GO:0006629,GO:0006631,GO:0006690,GO:0006725,GO:0006950,GO:0006979,GO:0008150,GO:0008152,GO:0009056,GO:0009636,GO:0009987,GO:0016020,GO:0016787,GO:0016788,GO:0019372,GO:0019439,GO:0019752,GO:0032787,GO:0042221,GO:…	3.1.1.2,3.1.8.1	ko:K01045	Arylesterase,RVT_1
g802.t1	K	Short stature homeobox	SHOX2	GO:0000122,GO:0000981,GO:0001227,GO:0001501,GO:0001503,GO:0001649,GO:0002053,GO:0002062,GO:0002063,GO:0003007,GO:0003170,GO:0003205,GO:0003206,GO:0003209,GO:0003230,GO:0003674,GO:0003676,GO:0003677,GO:0003700,GO:0005488,GO:0005575,GO:0005622,GO:0005623,GO:0005634,GO:0006355,GO:0006357,GO:0007275,GO:0007399,GO:0007507,GO:0007517,GO:0008150,GO:0008284,GO:0008589,GO:0009653,GO:0009790,GO:0009792,GO:…	-	ko:K09331	Homeobox,OAR
g809.t1	E	cellular response to UV-A	MME	GO:0001655,GO:0001775,GO:0001822,GO:0001990,GO:0001991,GO:0002002,GO:0002003,GO:0002252,GO:0002263,GO:0002274,GO:0002275,GO:0002283,GO:0002366,GO:0002376,GO:0002443,GO:0002444,GO:0002446,GO:0003008,GO:0003013,GO:0003044,GO:0003073,GO:0003081,GO:0003674,GO:0003824,GO:0004175,GO:0004222,GO:0005488,GO:0005575,GO:0005576,GO:0005615,GO:0005622,GO:0005623,GO:0005737,GO:0005783,GO:0005886,GO:0005887,GO:…	3.4.24.11	ko:K01389,ko:K08635	BTB,Peptidase_M13,Peptidase_M13_N,TRA-1_regulated
g811.t1	T	Kinase-like	-	GO:0001101,GO:0003674,GO:0003824,GO:0004672,GO:0004674,GO:0004842,GO:0005488,GO:0005515,GO:0005575,GO:0005622,GO:0005623,GO:0005737,GO:0005768,GO:0005769,GO:0005794,GO:0005802,GO:0006464,GO:0006468,GO:0006793,GO:0006796,GO:0006807,GO:0006810,GO:0006950,GO:0006952,GO:0007034,GO:0007154,GO:0007165,GO:0008150,GO:0008152,GO:0009719,GO:0009725,GO:0009737,GO:0009738,GO:0009755,GO:0009787,GO:0009788,GO:…	-	-	DOG1,EMP70,Pkinase,Pkinase_Tyr
g812.t1	O	Astacin (Peptidase family M12A)	MEP1B	GO:0003674,GO:0003824,GO:0004175,GO:0004222,GO:0005488,GO:0005515,GO:0005575,GO:0005576,GO:0005615,GO:0005623,GO:0005886,GO:0005887,GO:0006508,GO:0006807,GO:0006810,GO:0008150,GO:0008152,GO:0008233,GO:0008237,GO:0016020,GO:0016021,GO:0016787,GO:0017090,GO:0019538,GO:0031224,GO:0031226,GO:0032991,GO:0042802,GO:0043170,GO:0044238,GO:0044421,GO:0044425,GO:0044459,GO:0044464,GO:0051179,GO:0051234,GO:…	3.4.24.18,3.4.24.63	ko:K01395,ko:K08606	Astacin,DUF1891,EGF,Histone,Lectin_C,MAM,Methyltransf_FA,TSP_1,VCBS,VWD
g814.t1	S	Lysosomal-associated transmembrane	LAPTM4A	GO:0000323,GO:0001817,GO:0001818,GO:0003674,GO:0005488,GO:0005515,GO:0005543,GO:0005575,GO:0005622,GO:0005623,GO:0005737,GO:0005764,GO:0005765,GO:0005768,GO:0005769,GO:0005770,GO:0005771,GO:0005773,GO:0005774,GO:0005794,GO:0005886,GO:0006810,GO:0006996,GO:0007032,GO:0007033,GO:0007040,GO:0008150,GO:0008289,GO:0009892,GO:0009894,GO:0009895,GO:0009987,GO:0010008,GO:0010256,GO:0010605,GO:0012505,GO:…	-	ko:K12387	BACK,BTB,DUF4734,Mtp
g815.t1	GQ	Oxidoreductase family, NAD-binding Rossmann fold	DHDH	GO:0003674,GO:0003824,GO:0005975,GO:0005996,GO:0006091,GO:0008150,GO:0008152,GO:0008746,GO:0009055,GO:0009056,GO:0009987,GO:0016052,GO:0016491,GO:0016614,GO:0016616,GO:0016651,GO:0016652,GO:0019321,GO:0019323,GO:0022900,GO:0042732,GO:0042843,GO:0044237,GO:0044238,GO:0044281,GO:0044282,GO:0046365,GO:0047837,GO:0055114,GO:0071704,GO:1901575	1.1.1.179,1.3.1.20	ko:K00078	Bcl-2,DUF4817,GFO_IDH_MocA,GFO_IDH_MocA_C
g816.t1	T	Octopamine receptor activity. It is involved in the biological process described with G-protein coupled receptor signaling pathway	ser-2	GO:0003008,GO:0003674,GO:0004888,GO:0004930,GO:0004935,GO:0005575,GO:0005623,GO:0005886,GO:0005887,GO:0007154,GO:0007165,GO:0007186,GO:0007187,GO:0007188,GO:0007189,GO:0007211,GO:0007212,GO:0007267,GO:0007600,GO:0007606,GO:0007608,GO:0008150,GO:0008226,GO:0008227,GO:0008277,GO:0009966,GO:0009967,GO:0009987,GO:0010578,GO:0010646,GO:0010647,GO:0016020,GO:0016021,GO:0019932,GO:0019933,GO:0019935,GO:…	-	ko:K04153,ko:K04163	7tm_1
g819.t1	T	Adrenergic, alpha-2D-, receptor	adra2a	GO:0002682,GO:0002683,GO:0003674,GO:0004888,GO:0004930,GO:0004935,GO:0004936,GO:0004938,GO:0004989,GO:0005575,GO:0005623,GO:0005886,GO:0005887,GO:0007154,GO:0007165,GO:0007186,GO:0007187,GO:0007188,GO:0007189,GO:0007193,GO:0007211,GO:0007267,GO:0008150,GO:0008227,GO:0009966,GO:0009987,GO:0010646,GO:0016020,GO:0016021,GO:0019932,GO:0019933,GO:0019935,GO:0023051,GO:0023052,GO:0030594,GO:0031224,GO:…	-	ko:K04138,ko:K04139,ko:K04140	7tm_1,Na_Pi_cotrans
g819.t2	T	adenylate cyclase-inhibiting adrenergic receptor signaling pathway	ADRA2B	GO:0002682,GO:0002683,GO:0003674,GO:0004888,GO:0004930,GO:0004935,GO:0004936,GO:0004938,GO:0004989,GO:0005575,GO:0005623,GO:0005886,GO:0005887,GO:0007154,GO:0007165,GO:0007186,GO:0007187,GO:0007188,GO:0007189,GO:0007193,GO:0007211,GO:0007267,GO:0008150,GO:0008227,GO:0009966,GO:0009987,GO:0010646,GO:0016020,GO:0016021,GO:0019932,GO:0019933,GO:0019935,GO:0023051,GO:0023052,GO:0030594,GO:0031224,GO:…	-	ko:K04138,ko:K04139,ko:K04140	7tm_1,Na_Pi_cotrans
g1274.t1	O	Zinc-dependent metalloprotease	MEP1B	GO:0003674,GO:0003824,GO:0004175,GO:0004222,GO:0005488,GO:0005515,GO:0005575,GO:0005623,GO:0005886,GO:0005887,GO:0006508,GO:0006807,GO:0006810,GO:0007275,GO:0007610,GO:0007631,GO:0008150,GO:0008152,GO:0008233,GO:0008237,GO:0016020,GO:0016021,GO:0016787,GO:0017090,GO:0019538,GO:0031224,GO:0031226,GO:0032501,GO:0032502,GO:0032991,GO:0035295,GO:0042755,GO:0042802,GO:0043050,GO:0043170,GO:0044238,GO:…	3.4.24.21,3.4.24.63	ko:K08076,ko:K08606	Astacin,EGF,Histone,MAM,ShK,TSP_1,Trypsin
g1275.t1	O	Belongs to the TRAFAC class dynamin-like GTPase superfamily. Dynamin Fzo YdjA family	MFN2	GO:0000003,GO:0000045,GO:0000166,GO:0000278,GO:0001101,GO:0001654,GO:0001666,GO:0001678,GO:0001701,GO:0001824,GO:0001825,GO:0001882,GO:0001883,GO:0002165,GO:0002682,GO:0002683,GO:0002831,GO:0002832,GO:0003006,GO:0003674,GO:0003824,GO:0003924,GO:0005488,GO:0005515,GO:0005525,GO:0005575,GO:0005622,GO:0005623,GO:0005737,GO:0005739,GO:0005740,GO:0005741,GO:0005829,GO:0005856,GO:0006066,GO:0006605,GO:…	-	ko:K06030,ko:K21356	Dynamin_N,FAF,Fzo_mitofusin,SAM_2,TMP-TENI
g1277.t1	T	G-protein coupled receptor	-	-	2.4.1.145,2.4.1.201	ko:K08428,ko:K13748	7tm_1,Glyco_transf_54
g1278.t1	S	Serpentine type 7TM GPCR chemoreceptor Srw	-	-	-	-	7TM_GPCR_Srw
g1279.t1	M	Apolipoprotein D	APOD	GO:0000302,GO:0001525,GO:0001568,GO:0001817,GO:0001818,GO:0001944,GO:0001952,GO:0001953,GO:0002682,GO:0002683,GO:0002685,GO:0002686,GO:0003674,GO:0005215,GO:0005319,GO:0005488,GO:0005496,GO:0005575,GO:0005576,GO:0005615,GO:0005622,GO:0005623,GO:0005737,GO:0005783,GO:0005829,GO:0005840,GO:0005975,GO:0005996,GO:0006006,GO:0006629,GO:0006810,GO:0006869,GO:0006950,GO:0006979,GO:0007162,GO:0007275,GO:…	-	ko:K03098,ko:K18271	Lipocalin,Lipocalin_2,Triabin
g1280.t1	T	phosphorus-oxygen lyase activity. It is involved in the biological process described with	NPR2	GO:0000003,GO:0000166,GO:0001501,GO:0001558,GO:0001653,GO:0001882,GO:0001883,GO:0003008,GO:0003013,GO:0003014,GO:0003018,GO:0003674,GO:0003824,GO:0004383,GO:0004888,GO:0004930,GO:0005488,GO:0005515,GO:0005524,GO:0005525,GO:0005575,GO:0005622,GO:0005623,GO:0005737,GO:0005829,GO:0005886,GO:0005887,GO:0006139,GO:0006163,GO:0006164,GO:0006182,GO:0006584,GO:0006725,GO:0006753,GO:0006793,GO:0006796,GO:…	4.6.1.2	ko:K12323,ko:K12324	ANF_receptor,Dimer_Tnp_hAT,Guanylate_cyc,HNOBA,Pkinase,Pkinase_Tyr
g1282.t1	F	Equilibrative nucleoside transporter	SLC29A1	GO:0000322,GO:0000323,GO:0000324,GO:0000329,GO:0001666,GO:0001678,GO:0003008,GO:0003674,GO:0005215,GO:0005337,GO:0005575,GO:0005622,GO:0005623,GO:0005634,GO:0005730,GO:0005737,GO:0005773,GO:0005774,GO:0005886,GO:0005887,GO:0006139,GO:0006725,GO:0006807,GO:0006810,GO:0006863,GO:0006950,GO:0007154,GO:0007165,GO:0007166,GO:0007267,GO:0007268,GO:0007275,GO:0007589,GO:0007595,GO:0008150,GO:0008152,GO:…	-	ko:K03323,ko:K15014	Bud13,Nucleoside_tran,Pinin_SDK_memA,p450
g1283.t1	Q	Cytochrome P450, family 2, subfamily J, polypeptide 2	CYP2J2	GO:0001523,GO:0001676,GO:0001817,GO:0001819,GO:0001990,GO:0001998,GO:0002034,GO:0002791,GO:0002793,GO:0003008,GO:0003013,GO:0003014,GO:0003018,GO:0003044,GO:0003071,GO:0003072,GO:0003073,GO:0003081,GO:0003084,GO:0003674,GO:0003824,GO:0003958,GO:0004497,GO:0005575,GO:0005622,GO:0005623,GO:0005737,GO:0005783,GO:0005789,GO:0006082,GO:0006629,GO:0006631,GO:0006690,GO:0006720,GO:0006721,GO:0006805,GO:…	1.14.14.1	ko:K07418,ko:K17857	RVT_1,SDF,p450
g1284.t1	T	melatonin receptor activity	MTNR1A	GO:0000003,GO:0001654,GO:0002791,GO:0002792,GO:0003008,GO:0003013,GO:0003018,GO:0003674,GO:0004888,GO:0004930,GO:0005488,GO:0005575,GO:0005623,GO:0005886,GO:0005887,GO:0006109,GO:0006110,GO:0006140,GO:0006873,GO:0006874,GO:0006875,GO:0007154,GO:0007165,GO:0007186,GO:0007187,GO:0007188,GO:0007193,GO:0007267,GO:0007268,GO:0007275,GO:0007423,GO:0007568,GO:0007610,GO:0007617,GO:0007618,GO:0007623,GO:…	-	ko:K04160,ko:K04163,ko:K04285,ko:K04286,ko:K08409	7tm_1,ATG27
g1286.t1	L	transposition, RNA-mediated	-	-	-	-	Phage_integrase,RVT_1
g1287.t1	-	-	-	-	-	-	-
g1288.t1	-	-	-	-	-	-	-
g1290.t1	T	Adenylyl- / guanylyl cyclase, catalytic domain	-	GO:0003674,GO:0003824,GO:0004383,GO:0005575,GO:0005622,GO:0005623,GO:0005737,GO:0005829,GO:0005886,GO:0005887,GO:0006139,GO:0006163,GO:0006164,GO:0006182,GO:0006725,GO:0006753,GO:0006793,GO:0006796,GO:0006807,GO:0007154,GO:0007165,GO:0008074,GO:0008150,GO:0008152,GO:0009058,GO:0009117,GO:0009150,GO:0009152,GO:0009165,GO:0009187,GO:0009190,GO:0009259,GO:0009260,GO:0009975,GO:0009987,GO:0016020,GO:…	4.6.1.2	ko:K12323,ko:K12324	ANF_receptor,Ank_2,Guanylate_cyc,HNOBA,Pkinase,Pkinase_Tyr
g1291.t1	E	Belongs to the peptidase S1 family	-	-	3.4.21.1,3.4.21.2,3.4.21.36,3.4.21.70,3.4.21.71	ko:K01310,ko:K01311,ko:K01326,ko:K01345,ko:K01346,ko:K01362,ko:K09632,ko:K14616	7tm_2,CPW_WPC,CUB,EGF,EGF_CA,GAIN,GMP_PDE_delta,GPS,IgGFc_binding,Ldl_recept_b,Lectin_C,MAM,TSP_1,Trypsin,hEGF
g1292.t1	O	endopeptidase inhibitor activity	CD109	GO:0000768,GO:0001932,GO:0001933,GO:0001942,GO:0002376,GO:0002520,GO:0002521,GO:0002573,GO:0002576,GO:0003674,GO:0005488,GO:0005515,GO:0005575,GO:0005576,GO:0005615,GO:0005622,GO:0005623,GO:0005737,GO:0005886,GO:0006810,GO:0006887,GO:0006949,GO:0006950,GO:0006952,GO:0007275,GO:0008150,GO:0008285,GO:0008544,GO:0009605,GO:0009607,GO:0009617,GO:0009620,GO:0009653,GO:0009888,GO:0009892,GO:0009966,GO:…	-	ko:K06530	A2M,A2M_N,A2M_N_2,A2M_comp,A2M_recep,DUF1891,TLV_coat,Thiol-ester_cl,VIR_N
g1293.t1	O	Astacin-like metallo-endopeptidase (M12 family)	-	-	3.4.24.63	ko:K08606	Astacin,Ricin_B_lectin
g1294.t1	F	Equilibrative nucleoside transporter	SLC29A1	GO:0000322,GO:0000323,GO:0000324,GO:0000329,GO:0001666,GO:0001678,GO:0003008,GO:0003674,GO:0005215,GO:0005337,GO:0005575,GO:0005622,GO:0005623,GO:0005634,GO:0005730,GO:0005737,GO:0005773,GO:0005774,GO:0005886,GO:0005887,GO:0006139,GO:0006725,GO:0006807,GO:0006810,GO:0006863,GO:0006950,GO:0007154,GO:0007165,GO:0007166,GO:0007267,GO:0007268,GO:0007275,GO:0007589,GO:0007595,GO:0008150,GO:0008152,GO:…	-	ko:K03323,ko:K15014	Bud13,Nucleoside_tran,Pinin_SDK_memA,p450
g1295.t1	S	Serpentine type 7TM GPCR chemoreceptor Srw	-	-	-	-	7TM_GPCR_Srw
g1298.t1	S	F-box protein 30	FBXO30	GO:0000209,GO:0003674,GO:0003824,GO:0004842,GO:0005575,GO:0005622,GO:0005623,GO:0005737,GO:0005829,GO:0006464,GO:0006807,GO:0008150,GO:0008152,GO:0009987,GO:0016567,GO:0016740,GO:0019538,GO:0019787,GO:0032446,GO:0036211,GO:0043170,GO:0043412,GO:0043687,GO:0044237,GO:0044238,GO:0044260,GO:0044267,GO:0044424,GO:0044444,GO:0044464,GO:0070647,GO:0071704,GO:0140096,GO:1901564	-	ko:K10307	F-box_4,GLTSCR1,zf-TRAF_2
g1300.t1	O	Astacin (Peptidase family M12A)	nas-15	-	3.4.24.21	ko:K08076	Astacin,ShK
g4299.t1	T	guanylate cyclase activity	-	GO:0003674,GO:0003824,GO:0004383,GO:0005575,GO:0005622,GO:0005623,GO:0005737,GO:0005829,GO:0005886,GO:0005887,GO:0006139,GO:0006163,GO:0006164,GO:0006182,GO:0006725,GO:0006753,GO:0006793,GO:0006796,GO:0006807,GO:0007154,GO:0007165,GO:0008074,GO:0008150,GO:0008152,GO:0009058,GO:0009117,GO:0009150,GO:0009152,GO:0009165,GO:0009187,GO:0009190,GO:0009259,GO:0009260,GO:0009975,GO:0009987,GO:0016020,GO:…	4.6.1.2	ko:K12323,ko:K12324,ko:K12325	ANF_receptor,Ank_2,Guanylate_cyc,HNOBA,Pkinase,Pkinase_Tyr
g4300.t1	T	guanylate cyclase activity	-	GO:0003674,GO:0003824,GO:0004383,GO:0005575,GO:0005622,GO:0005623,GO:0005737,GO:0005829,GO:0005886,GO:0005887,GO:0006139,GO:0006163,GO:0006164,GO:0006182,GO:0006725,GO:0006753,GO:0006793,GO:0006796,GO:0006807,GO:0007154,GO:0007165,GO:0008074,GO:0008150,GO:0008152,GO:0009058,GO:0009117,GO:0009150,GO:0009152,GO:0009165,GO:0009187,GO:0009190,GO:0009259,GO:0009260,GO:0009975,GO:0009987,GO:0016020,GO:…	4.6.1.2	ko:K12323,ko:K12324	ANF_receptor,Ank_2,Guanylate_cyc,HNOBA,Pkinase,Pkinase_Tyr
g4300.t2	T	guanylate cyclase activity	-	GO:0003674,GO:0003824,GO:0004383,GO:0005575,GO:0005622,GO:0005623,GO:0005737,GO:0005829,GO:0005886,GO:0005887,GO:0006139,GO:0006163,GO:0006164,GO:0006182,GO:0006725,GO:0006753,GO:0006793,GO:0006796,GO:0006807,GO:0007154,GO:0007165,GO:0008074,GO:0008150,GO:0008152,GO:0009058,GO:0009117,GO:0009150,GO:0009152,GO:0009165,GO:0009187,GO:0009190,GO:0009259,GO:0009260,GO:0009975,GO:0009987,GO:0016020,GO:…	4.6.1.2	ko:K12323,ko:K12324	ANF_receptor,Ank_2,Guanylate_cyc,HNOBA,Pkinase,Pkinase_Tyr
g4301.t1	MPT	Ion transport protein	-	GO:0001964,GO:0003008,GO:0003674,GO:0005215,GO:0005216,GO:0005261,GO:0005262,GO:0005488,GO:0005515,GO:0005575,GO:0005623,GO:0005886,GO:0005887,GO:0005929,GO:0006810,GO:0006811,GO:0006812,GO:0006816,GO:0007600,GO:0007605,GO:0007610,GO:0007638,GO:0008092,GO:0008150,GO:0008324,GO:0008381,GO:0009581,GO:0009582,GO:0009605,GO:0009612,GO:0009628,GO:0009987,GO:0010996,GO:0015075,GO:0015085,GO:0015267,GO:…	-	ko:K04967,ko:K13803,ko:K15502,ko:K21415	Ank,Ank_2,Ank_3,Ank_4,Ank_5,COesterase,DDE_Tnp_1_7,Ion_trans,PKD_channel,Sema,TRP_2
g4302.t1	P	Selenium-binding protein	SELENBP1	GO:0000103,GO:0000302,GO:0000741,GO:0001650,GO:0003674,GO:0005488,GO:0005575,GO:0005622,GO:0005623,GO:0005634,GO:0005730,GO:0005737,GO:0005829,GO:0005911,GO:0006790,GO:0006950,GO:0006979,GO:0006996,GO:0006997,GO:0007275,GO:0008150,GO:0008152,GO:0008430,GO:0009506,GO:0009553,GO:0009559,GO:0009561,GO:0009636,GO:0009987,GO:0010035,GO:0010038,GO:0010197,GO:0010269,GO:0016043,GO:0030054,GO:0030154,GO:…	3.1.3.16	ko:K01090,ko:K17285	7TM_GPCR_Srw,DUF1759,DYW_deaminase,G10,LRRNT_2,LRR_8,Metallophos,PPR,Pkinase,SBP56,TTR-52
g4303.t1	T	guanylate cyclase activity	-	GO:0003674,GO:0003824,GO:0004383,GO:0005575,GO:0005622,GO:0005623,GO:0005737,GO:0005829,GO:0005886,GO:0005887,GO:0006139,GO:0006163,GO:0006164,GO:0006182,GO:0006725,GO:0006753,GO:0006793,GO:0006796,GO:0006807,GO:0007154,GO:0007165,GO:0008074,GO:0008150,GO:0008152,GO:0009058,GO:0009117,GO:0009150,GO:0009152,GO:0009165,GO:0009187,GO:0009190,GO:0009259,GO:0009260,GO:0009975,GO:0009987,GO:0016020,GO:…	4.6.1.2	ko:K12323,ko:K12324	ANF_receptor,Ank_2,Guanylate_cyc,HNOBA,Pkinase,Pkinase_Tyr
g4304.t1	D	Speckle-type poz protein	SPOPL	GO:0000122,GO:0000151,GO:0000209,GO:0001085,GO:0001654,GO:0001736,GO:0001738,GO:0001745,GO:0001932,GO:0001934,GO:0002009,GO:0003002,GO:0003674,GO:0005488,GO:0005515,GO:0005575,GO:0005622,GO:0005623,GO:0005634,GO:0005654,GO:0005737,GO:0006355,GO:0006357,GO:0006464,GO:0006508,GO:0006511,GO:0006515,GO:0006807,GO:0006950,GO:0007163,GO:0007164,GO:0007275,GO:0007350,GO:0007365,GO:0007367,GO:0007389,GO:…	-	ko:K10523	BTB,MATH
g4305.t1	-	-	-	-	-	-	-
g4306.t1	L	G-protein coupled receptor activity. It is involved in the biological process described with	OPN4	GO:0000122,GO:0000323,GO:0000902,GO:0000904,GO:0001654,GO:0001745,GO:0001750,GO:0001751,GO:0001754,GO:0003008,GO:0003674,GO:0004888,GO:0004930,GO:0005488,GO:0005501,GO:0005502,GO:0005515,GO:0005575,GO:0005622,GO:0005623,GO:0005737,GO:0005764,GO:0005767,GO:0005768,GO:0005769,GO:0005770,GO:0005771,GO:0005773,GO:0005783,GO:0005790,GO:0005791,GO:0005886,GO:0005887,GO:0005929,GO:0006355,GO:0006357,GO:…	2.1.2.9	ko:K00604,ko:K04255,ko:K13802,ko:K19867	7tm_1,COMM_domain,DUF4749,Formyl_trans_C,Formyl_trans_N,LIM,MoCF_biosynth,Nup88,PDZ,RVT_2
g4306.t2	L	G-protein coupled receptor activity. It is involved in the biological process described with	OPN4	GO:0000122,GO:0000323,GO:0000902,GO:0000904,GO:0001654,GO:0001745,GO:0001750,GO:0001751,GO:0001754,GO:0003008,GO:0003674,GO:0004888,GO:0004930,GO:0005488,GO:0005501,GO:0005502,GO:0005515,GO:0005575,GO:0005622,GO:0005623,GO:0005737,GO:0005764,GO:0005767,GO:0005768,GO:0005769,GO:0005770,GO:0005771,GO:0005773,GO:0005783,GO:0005790,GO:0005791,GO:0005886,GO:0005887,GO:0005929,GO:0006355,GO:0006357,GO:…	2.1.2.9	ko:K00604,ko:K04255,ko:K13802,ko:K19867	7tm_1,COMM_domain,DUF4749,Formyl_trans_C,Formyl_trans_N,LIM,MoCF_biosynth,Nup88,PDZ,RVT_2
g4307.t1	O	Fungal-type cellulose-binding domain	-	-	-	-	CBM_1,Glyco_hydro_45,NACHT_N
g4308.t1	T	Growth factor receptor	PDGFRB	GO:0000003,GO:0000165,GO:0000302,GO:0000323,GO:0001101,GO:0001501,GO:0001525,GO:0001568,GO:0001570,GO:0001654,GO:0001655,GO:0001656,GO:0001701,GO:0001822,GO:0001894,GO:0001932,GO:0001934,GO:0001944,GO:0003006,GO:0003338,GO:0003674,GO:0003824,GO:0004672,GO:0004713,GO:0004714,GO:0004888,GO:0004930,GO:0004992,GO:0005017,GO:0005019,GO:0005085,GO:0005088,GO:0005102,GO:0005161,GO:0005488,GO:0005515,GO:…	2.7.10.1	ko:K04363,ko:K05089,ko:K05090,ko:K05091,ko:K05092,ko:K05096,ko:K05097,ko:K05098	I-set,Ig_2,Ig_3,Pkinase_Tyr,ig
g4309.t1	P	Alpha-carbonic anhydrase	CA14	GO:0003674,GO:0003824,GO:0004089,GO:0005575,GO:0005623,GO:0005886,GO:0006730,GO:0006810,GO:0006811,GO:0006820,GO:0006885,GO:0008150,GO:0008152,GO:0009897,GO:0009986,GO:0009987,GO:0015669,GO:0015670,GO:0015701,GO:0015711,GO:0015893,GO:0016020,GO:0016021,GO:0016829,GO:0016835,GO:0016836,GO:0019755,GO:0031224,GO:0031225,GO:0031226,GO:0031233,GO:0042221,GO:0042493,GO:0042592,GO:0044237,GO:0044281,GO:…	4.2.1.1	ko:K01672,ko:K01674,ko:K18246	Carb_anhydrase,Lectin_C
g4310.t1	T	It is involved in the biological process described with	-	GO:0003674,GO:0003824,GO:0004383,GO:0005575,GO:0005622,GO:0005623,GO:0005737,GO:0005829,GO:0005886,GO:0005887,GO:0006139,GO:0006163,GO:0006164,GO:0006182,GO:0006725,GO:0006753,GO:0006793,GO:0006796,GO:0006807,GO:0007154,GO:0007165,GO:0008074,GO:0008150,GO:0008152,GO:0009058,GO:0009117,GO:0009150,GO:0009152,GO:0009165,GO:0009187,GO:0009190,GO:0009259,GO:0009260,GO:0009975,GO:0009987,GO:0016020,GO:…	4.6.1.2	ko:K12323,ko:K12324	ANF_receptor,Ank_2,Guanylate_cyc,HNOBA,Pkinase,Pkinase_Tyr
g4311.t1	S	carnitine transmembrane transporter activity	-	-	-	ko:K08202,ko:K08203	MFS_1,Sugar_tr
g4312.t1	S	Zinc-finger containing family	ZC3H11A	GO:0000981,GO:0003674,GO:0003676,GO:0003700,GO:0003723,GO:0003729,GO:0005488,GO:0005575,GO:0005622,GO:0005623,GO:0005634,GO:0005654,GO:0006139,GO:0006355,GO:0006357,GO:0006396,GO:0006397,GO:0006403,GO:0006405,GO:0006406,GO:0006611,GO:0006725,GO:0006807,GO:0006810,GO:0006886,GO:0006913,GO:0008104,GO:0008150,GO:0008152,GO:0009889,GO:0009987,GO:0010467,GO:0010468,GO:0010556,GO:0015031,GO:0015833,GO:…	-	ko:K22415	zf-BED,zf-CCCH,zf-CCCH_2,zf-CCCH_3
g4313.t1	T	cAMP-dependent protein kinase regulator activity. It is involved in the biological process described with regulation of protein phosphorylation	PRKAR2B	GO:0000003,GO:0000086,GO:0000166,GO:0000228,GO:0000278,GO:0000785,GO:0000790,GO:0000902,GO:0000904,GO:0001664,GO:0001674,GO:0001932,GO:0001933,GO:0001934,GO:0002831,GO:0002832,GO:0003008,GO:0003014,GO:0003091,GO:0003674,GO:0004857,GO:0004860,GO:0004862,GO:0005102,GO:0005488,GO:0005515,GO:0005575,GO:0005622,GO:0005623,GO:0005634,GO:0005694,GO:0005737,GO:0005739,GO:0005740,GO:0005743,GO:0005813,GO:…	-	ko:K04739,ko:K15109	Methyltransf_16,Mito_carr,MutS_III,MutS_V,RIIa,Rho_GDI,SAGA-Tad1,cNMP_binding
g5465.t1	T	fibroblast growth factor-activated receptor activity	RET	GO:0000003,GO:0000165,GO:0000187,GO:0000578,GO:0000902,GO:0000904,GO:0001101,GO:0001654,GO:0001655,GO:0001656,GO:0001657,GO:0001667,GO:0001709,GO:0001755,GO:0001822,GO:0001823,GO:0001838,GO:0001932,GO:0001934,GO:0001952,GO:0001954,GO:0002009,GO:0002119,GO:0002164,GO:0002376,GO:0002520,GO:0003002,GO:0003006,GO:0003674,GO:0003824,GO:0004672,GO:0004713,GO:0004714,GO:0004888,GO:0005085,GO:0005088,GO:…	2.7.10.1	ko:K04362,ko:K05093,ko:K05094,ko:K05126,ko:K12378	CARMIL_C,Cadherin,I-set,LRR_6,Pkinase_Tyr
g5466.t1	L	transposition, RNA-mediated	-	-	-	-	rve,zf-CCHC,zf-H2C2
g5468.t1	O	It is involved in the biological process described with proteolysis	mep1b	-	3.4.24.63	ko:K08606	Arf,Astacin,DUF1891,MAM
g5470.t1	S	Lytic transglycolase	-	-	-	-	DPBB_1
g5471.t1	O	Laminin G domain	HSPG2	GO:0000323,GO:0000902,GO:0000904,GO:0001523,GO:0003674,GO:0005102,GO:0005178,GO:0005488,GO:0005515,GO:0005575,GO:0005576,GO:0005604,GO:0005622,GO:0005623,GO:0005737,GO:0005764,GO:0005773,GO:0005775,GO:0005794,GO:0005796,GO:0005886,GO:0006022,GO:0006023,GO:0006024,GO:0006026,GO:0006027,GO:0006629,GO:0006720,GO:0006721,GO:0006807,GO:0006810,GO:0006897,GO:0006898,GO:0006928,GO:0006935,GO:0006950,GO:…	-	ko:K06255,ko:K20049	CUB,EGF,Fz,I-set,Ig_2,Ig_3,Laminin_B,Laminin_EGF,Laminin_G_1,Laminin_G_2,Ldl_recept_a,Pentapeptide_4,SEA,UCH,cEGF,fn3,hEGF,ig
g5472.t1	T	Immunoglobulin	KDR	GO:0000003,GO:0000165,GO:0000166,GO:0000186,GO:0000902,GO:0000904,GO:0001101,GO:0001525,GO:0001541,GO:0001558,GO:0001568,GO:0001569,GO:0001570,GO:0001654,GO:0001655,GO:0001666,GO:0001667,GO:0001763,GO:0001817,GO:0001818,GO:0001819,GO:0001889,GO:0001894,GO:0001932,GO:0001934,GO:0001936,GO:0001937,GO:0001938,GO:0001944,GO:0001945,GO:0001946,GO:0001952,GO:0001954,GO:0002009,GO:0002040,GO:0002042,GO:…	2.7.10.1,3.4.21.109	ko:K04362,ko:K05089,ko:K05093,ko:K05096,ko:K05097,ko:K05098,ko:K08670	CUB,I-set,Ig_2,Ig_3,Ldl_recept_a,Pkinase_Tyr,Trypsin,V-set,ig
g5475.t1	O	Belongs to the peptidase C1 family	-	-	3.4.22.1,3.4.22.15,3.4.22.27,3.4.22.38	ko:K01363,ko:K01365,ko:K01368,ko:K01371	Inhibitor_I29,Peptidase_C1,Propeptide_C1
g5476.t1	S	CECR6/TMEM121 family	-	-	-	-	CECR6_TMEM121
g5477.t1	T	Mitogen-activated protein kinase kinase kinase 1-like	-	GO:0000165,GO:0000186,GO:0001101,GO:0001932,GO:0001934,GO:0003674,GO:0003676,GO:0003677,GO:0003700,GO:0003824,GO:0004672,GO:0004674,GO:0004709,GO:0005488,GO:0005515,GO:0005575,GO:0005622,GO:0005623,GO:0005634,GO:0005737,GO:0005768,GO:0005886,GO:0006355,GO:0006464,GO:0006468,GO:0006793,GO:0006796,GO:0006807,GO:0006950,GO:0006970,GO:0007154,GO:0007165,GO:0007275,GO:0007346,GO:0007584,GO:0008150,GO:…	2.7.11.25	ko:K13414,ko:K20605	CaATP_NAI,Calmodulin_bind,LRR_3,NB-ARC,PAH,Pkinase,TIR,WRKY
g5478.t1	I	Fatty acid desaturase	FAD2	GO:0003674,GO:0003824,GO:0004497,GO:0005575,GO:0005622,GO:0005623,GO:0005737,GO:0005783,GO:0005789,GO:0008150,GO:0008152,GO:0012505,GO:0016020,GO:0016021,GO:0016491,GO:0016705,GO:0016709,GO:0030176,GO:0031224,GO:0031227,GO:0031984,GO:0042175,GO:0043226,GO:0043227,GO:0043229,GO:0043231,GO:0044422,GO:0044424,GO:0044425,GO:0044432,GO:0044444,GO:0044446,GO:0044464,GO:0045485,GO:0050183,GO:0055114,GO:…	1.14.18.4,1.14.19.16,1.14.19.22,1.14.19.33,1.14.19.34,1.14.19.6	ko:K10256,ko:K21704,ko:K21710,ko:K21736	DUF3474,FA_desaturase,Plant_tran
g5482.t1	O	Trypsin-like serine protease	yip7	GO:0003674,GO:0003824,GO:0004175,GO:0004252,GO:0006508,GO:0006807,GO:0008150,GO:0008152,GO:0008233,GO:0008236,GO:0016787,GO:0017171,GO:0019538,GO:0043170,GO:0044238,GO:0070011,GO:0071704,GO:0140096,GO:1901564	3.1.3.4,3.4.21.1,3.4.21.36,3.4.21.4,3.4.21.49,3.4.21.71	ko:K01080,ko:K01310,ko:K01312,ko:K01326,ko:K01346,ko:K09640,ko:K20752	CBM_14,PAP2,RED_C,RED_N,RRM_1,Trypsin
g6297.t1	T	Natriuretic peptide receptor	NPR1	GO:0000166,GO:0001558,GO:0001653,GO:0001882,GO:0001883,GO:0003008,GO:0003013,GO:0003014,GO:0003018,GO:0003674,GO:0003824,GO:0004383,GO:0004888,GO:0004930,GO:0005488,GO:0005515,GO:0005525,GO:0005575,GO:0005622,GO:0005623,GO:0005737,GO:0005829,GO:0005886,GO:0005887,GO:0006139,GO:0006163,GO:0006164,GO:0006182,GO:0006584,GO:0006725,GO:0006753,GO:0006793,GO:0006796,GO:0006807,GO:0006810,GO:0006935,GO:…	4.6.1.2	ko:K12323,ko:K12324,ko:K12325,ko:K13140	ANF_receptor,Dimer_Tnp_hAT,Guanylate_cyc,HNOBA,Ints3,Pkinase,Pkinase_Tyr
g6298.t1	T	Receptor family ligand binding region	NPR1	GO:0000166,GO:0001558,GO:0001653,GO:0001882,GO:0001883,GO:0003008,GO:0003013,GO:0003014,GO:0003018,GO:0003674,GO:0003824,GO:0004383,GO:0004888,GO:0004930,GO:0005488,GO:0005515,GO:0005525,GO:0005575,GO:0005622,GO:0005623,GO:0005737,GO:0005829,GO:0005886,GO:0005887,GO:0006139,GO:0006163,GO:0006164,GO:0006182,GO:0006584,GO:0006725,GO:0006753,GO:0006793,GO:0006796,GO:0006807,GO:0006810,GO:0006935,GO:…	4.6.1.2	ko:K12323,ko:K12324,ko:K12325	ANF_receptor,Dimer_Tnp_hAT,Guanylate_cyc,HNOBA,Pkinase,Pkinase_Tyr
g6299.t1	G	Fucosyltransferase activity. It is involved in the biological process described with protein glycosylation	FUT7	GO:0000139,GO:0003674,GO:0003824,GO:0004553,GO:0004560,GO:0005575,GO:0005622,GO:0005623,GO:0005737,GO:0005794,GO:0005795,GO:0005797,GO:0005975,GO:0006464,GO:0006486,GO:0006807,GO:0007275,GO:0007399,GO:0008150,GO:0008152,GO:0008417,GO:0009058,GO:0009059,GO:0009100,GO:0009101,GO:0009987,GO:0012505,GO:0015928,GO:0016020,GO:0016051,GO:0016740,GO:0016757,GO:0016758,GO:0016787,GO:0016798,GO:0017060,GO:…	2.4.1.214	ko:K00753,ko:K07635,ko:K14464	DUF4817,Glyco_tran_10_N,Glyco_transf_10,SH2
g6304.t1	S	chitin binding. It is involved in the biological process described with chitin metabolic process	-	-	-	-	CBM_14
g6305.t1	T	Adenylyl- / guanylyl cyclase, catalytic domain	-	GO:0003674,GO:0003824,GO:0004383,GO:0005575,GO:0005622,GO:0005623,GO:0005737,GO:0005829,GO:0005886,GO:0005887,GO:0006139,GO:0006163,GO:0006164,GO:0006182,GO:0006725,GO:0006753,GO:0006793,GO:0006796,GO:0006807,GO:0007154,GO:0007165,GO:0008074,GO:0008150,GO:0008152,GO:0009058,GO:0009117,GO:0009150,GO:0009152,GO:0009165,GO:0009187,GO:0009190,GO:0009259,GO:0009260,GO:0009975,GO:0009987,GO:0016020,GO:…	4.6.1.2	ko:K12323,ko:K12324	ANF_receptor,Ank_2,Guanylate_cyc,HNOBA,Pkinase,Pkinase_Tyr
g6306.t1	P	large conductance calcium-activated potassium channel activity	KCNMA1	GO:0000003,GO:0001505,GO:0001508,GO:0001666,GO:0002065,GO:0003008,GO:0003012,GO:0003013,GO:0003014,GO:0003018,GO:0003674,GO:0003779,GO:0005215,GO:0005216,GO:0005227,GO:0005244,GO:0005249,GO:0005261,GO:0005267,GO:0005488,GO:0005515,GO:0005575,GO:0005576,GO:0005615,GO:0005622,GO:0005623,GO:0005737,GO:0005783,GO:0005886,GO:0005887,GO:0005901,GO:0006810,GO:0006811,GO:0006812,GO:0006813,GO:0006873,GO:…	-	ko:K04936,ko:K05274	BK_channel_a,Ion_trans,Ion_trans_2,KA1,Pkinase,Ribosomal_60s,TrkA_N
g6307.t1	P	Large conductance calcium-activated potassium channel activity. It is involved in the biological process described with potassium ion transport	KCNMA1	GO:0000003,GO:0001505,GO:0001508,GO:0001666,GO:0002065,GO:0003008,GO:0003012,GO:0003013,GO:0003014,GO:0003018,GO:0003674,GO:0003779,GO:0005215,GO:0005216,GO:0005227,GO:0005244,GO:0005249,GO:0005261,GO:0005267,GO:0005488,GO:0005515,GO:0005575,GO:0005576,GO:0005615,GO:0005622,GO:0005623,GO:0005737,GO:0005783,GO:0005886,GO:0005887,GO:0005901,GO:0006810,GO:0006811,GO:0006812,GO:0006813,GO:0006873,GO:…	-	ko:K04936,ko:K05274	BK_channel_a,Ion_trans,Ion_trans_2,KA1,Pkinase,Ribosomal_60s,TrkA_N
g6579.t1	-	-	-	-	-	-	7TM_GPCR_Srw,DNA_pol_B_2
g6580.t1	-	-	-	-	-	-	7TM_GPCR_Srw,DNA_pol_B_2
g6581.t1	G	protein serine/threonine kinase activity	-	GO:0003674,GO:0003824,GO:0004672,GO:0004674,GO:0005575,GO:0005622,GO:0005623,GO:0005634,GO:0005737,GO:0006464,GO:0006468,GO:0006793,GO:0006796,GO:0006807,GO:0007154,GO:0007165,GO:0008150,GO:0008152,GO:0009987,GO:0010468,GO:0016301,GO:0016310,GO:0016740,GO:0016772,GO:0016773,GO:0019222,GO:0019538,GO:0023052,GO:0035556,GO:0036211,GO:0043170,GO:0043226,GO:0043227,GO:0043229,GO:0043231,GO:0043412,GO:…	2.7.11.22	ko:K08828,ko:K08829	Pkinase
g6582.t1	T	It is involved in the biological process described with protein phosphorylation	CDKL1	GO:0000278,GO:0000281,GO:0000910,GO:0003674,GO:0003824,GO:0004672,GO:0004674,GO:0004693,GO:0005575,GO:0005622,GO:0005623,GO:0005634,GO:0005654,GO:0005737,GO:0005929,GO:0006464,GO:0006468,GO:0006793,GO:0006796,GO:0006807,GO:0007049,GO:0007275,GO:0007507,GO:0008150,GO:0008152,GO:0009987,GO:0016301,GO:0016310,GO:0016740,GO:0016772,GO:0016773,GO:0019538,GO:0022402,GO:0031344,GO:0031974,GO:0031981,GO:…	2.7.11.22	ko:K08824	Pkinase
g6585.t1	T	guanylate cyclase activity	-	GO:0003674,GO:0003824,GO:0004383,GO:0005575,GO:0005622,GO:0005623,GO:0005737,GO:0005829,GO:0005886,GO:0005887,GO:0006139,GO:0006163,GO:0006164,GO:0006182,GO:0006725,GO:0006753,GO:0006793,GO:0006796,GO:0006807,GO:0007154,GO:0007165,GO:0008074,GO:0008150,GO:0008152,GO:0009058,GO:0009117,GO:0009150,GO:0009152,GO:0009165,GO:0009187,GO:0009190,GO:0009259,GO:0009260,GO:0009975,GO:0009987,GO:0016020,GO:…	4.6.1.2	ko:K12323,ko:K12324	ANF_receptor,Ank_2,Guanylate_cyc,HNOBA,Pkinase,Pkinase_Tyr
g6586.t1	T	guanylate cyclase activity	-	GO:0003674,GO:0003824,GO:0004383,GO:0005575,GO:0005622,GO:0005623,GO:0005737,GO:0005829,GO:0005886,GO:0005887,GO:0006139,GO:0006163,GO:0006164,GO:0006182,GO:0006725,GO:0006753,GO:0006793,GO:0006796,GO:0006807,GO:0007154,GO:0007165,GO:0008074,GO:0008150,GO:0008152,GO:0009058,GO:0009117,GO:0009150,GO:0009152,GO:0009165,GO:0009187,GO:0009190,GO:0009259,GO:0009260,GO:0009975,GO:0009987,GO:0016020,GO:…	4.6.1.2	ko:K12323,ko:K12324,ko:K12325	ANF_receptor,Ank_2,Guanylate_cyc,HNOBA,Pkinase,Pkinase_Tyr
g6587.t1	O	Astacin (Peptidase family M12A)	-	-	-	-	Astacin,CUB
g6588.t1	T	protein modification by small protein conjugation	KLHL8	GO:0000151,GO:0005575,GO:0005622,GO:0005623,GO:0005634,GO:0005654,GO:0006464,GO:0006508,GO:0006511,GO:0006807,GO:0008150,GO:0008152,GO:0009056,GO:0009057,GO:0009987,GO:0014069,GO:0016567,GO:0019538,GO:0019941,GO:0030163,GO:0031461,GO:0031463,GO:0031974,GO:0031981,GO:0032279,GO:0032446,GO:0032991,GO:0036211,GO:0036477,GO:0042995,GO:0043005,GO:0043025,GO:0043170,GO:0043226,GO:0043227,GO:0043229,GO:…	-	ko:K10442,ko:K10446,ko:K10457	BACK,BTB,C2,HECT,Kelch_1,WW
g6589.t1	O	Zinc-dependent metalloprotease	mep1b	GO:0006810,GO:0006897,GO:0006909,GO:0008150,GO:0016192,GO:0051179,GO:0051234,GO:0098657	3.4.24.63	ko:K08606	Arf,Astacin,DUF1891,MAM
g6590.t1	O	Alpha-2-Macroglobulin	CD109	GO:0000768,GO:0001932,GO:0001933,GO:0001942,GO:0002376,GO:0002520,GO:0002521,GO:0002573,GO:0002576,GO:0003674,GO:0005488,GO:0005515,GO:0005575,GO:0005576,GO:0005615,GO:0005622,GO:0005623,GO:0005737,GO:0005886,GO:0006810,GO:0006887,GO:0006949,GO:0006950,GO:0006952,GO:0007275,GO:0008150,GO:0008285,GO:0008544,GO:0009605,GO:0009607,GO:0009617,GO:0009620,GO:0009653,GO:0009888,GO:0009892,GO:0009966,GO:…	-	ko:K03910,ko:K06530	A2M,A2M_N,A2M_N_2,A2M_comp,A2M_recep,DUF1891,TLV_coat,Thiol-ester_cl,VIR_N
g6591.t1	O	endopeptidase inhibitor activity	CD109	GO:0000768,GO:0001932,GO:0001933,GO:0001942,GO:0002376,GO:0002520,GO:0002521,GO:0002573,GO:0002576,GO:0003674,GO:0005488,GO:0005515,GO:0005575,GO:0005576,GO:0005622,GO:0005623,GO:0005737,GO:0005886,GO:0006810,GO:0006887,GO:0006949,GO:0006950,GO:0006952,GO:0007275,GO:0008150,GO:0008285,GO:0008544,GO:0009605,GO:0009607,GO:0009617,GO:0009653,GO:0009888,GO:0009892,GO:0009966,GO:0009968,GO:0009987,GO:…	-	ko:K03910,ko:K06530	A2M,A2M_N,A2M_N_2,A2M_comp,A2M_recep,DUF1891,TLV_coat,Thiol-ester_cl
g6591.t2	O	endopeptidase inhibitor activity	CD109	GO:0000768,GO:0001932,GO:0001933,GO:0001942,GO:0002376,GO:0002520,GO:0002521,GO:0002573,GO:0002576,GO:0003674,GO:0005488,GO:0005515,GO:0005575,GO:0005576,GO:0005622,GO:0005623,GO:0005737,GO:0005886,GO:0006810,GO:0006887,GO:0006949,GO:0006950,GO:0006952,GO:0007275,GO:0008150,GO:0008285,GO:0008544,GO:0009605,GO:0009607,GO:0009617,GO:0009653,GO:0009888,GO:0009892,GO:0009966,GO:0009968,GO:0009987,GO:…	-	ko:K03910,ko:K06530	A2M,A2M_N,A2M_N_2,A2M_comp,A2M_recep,DUF1891,TLV_coat,Thiol-ester_cl
g6592.t1	AT	mRNA methylation	KIAA1429	GO:0000003,GO:0000375,GO:0000381,GO:0001510,GO:0001667,GO:0002064,GO:0002065,GO:0002066,GO:0003006,GO:0003674,GO:0003676,GO:0005488,GO:0005515,GO:0005575,GO:0005622,GO:0005623,GO:0005634,GO:0005654,GO:0005737,GO:0005829,GO:0006139,GO:0006396,GO:0006725,GO:0006807,GO:0006928,GO:0006950,GO:0006952,GO:0007275,GO:0007276,GO:0007281,GO:0007292,GO:0007297,GO:0007298,GO:0007530,GO:0007538,GO:0007539,GO:…	-	ko:K06530	A2M,A2M_N,A2M_N_2,A2M_comp,A2M_recep,ANAPC3,Retrotran_gag_2,TPR_1,TPR_8,Thiol-ester_cl,VIR_N,zf-RVT
g6593.t1	T	Growth factor receptor	PDGFRB	GO:0000003,GO:0000165,GO:0000302,GO:0000323,GO:0001101,GO:0001501,GO:0001525,GO:0001568,GO:0001570,GO:0001654,GO:0001655,GO:0001656,GO:0001701,GO:0001822,GO:0001894,GO:0001932,GO:0001934,GO:0001944,GO:0003006,GO:0003338,GO:0003674,GO:0003824,GO:0004672,GO:0004713,GO:0004714,GO:0004888,GO:0004930,GO:0004992,GO:0005017,GO:0005019,GO:0005085,GO:0005088,GO:0005102,GO:0005161,GO:0005488,GO:0005515,GO:…	2.7.10.1	ko:K04363,ko:K05089,ko:K05090,ko:K05091,ko:K05092,ko:K05096,ko:K05097,ko:K05098	I-set,Ig_2,Ig_3,Pkinase_Tyr,ig
g6777.t1	-	-	-	-	-	-	7TM_GPCR_Srw,DNA_pol_B_2
g6779.t1	E	DBH-like monooxygenase protein 1	MOXD1	GO:0000003,GO:0000302,GO:0001101,GO:0001501,GO:0001505,GO:0001659,GO:0001816,GO:0001974,GO:0001975,GO:0002118,GO:0002121,GO:0002252,GO:0002376,GO:0002443,GO:0003008,GO:0003013,GO:0003018,GO:0003674,GO:0003824,GO:0004497,GO:0004500,GO:0004836,GO:0005488,GO:0005507,GO:0005575,GO:0005576,GO:0005615,GO:0005622,GO:0005623,GO:0005737,GO:0005783,GO:0005789,GO:0005815,GO:0005856,GO:0006066,GO:0006576,GO:…	1.14.17.1	ko:K00503,ko:K15266	CSD,Clat_adaptor_s,Cu2_monoox_C,Cu2_monooxygen,DOMON,RrnaAD
g6780.t1	E	dopamine beta-monooxygenase activity	moxd1	GO:0001505,GO:0003674,GO:0003824,GO:0004497,GO:0004500,GO:0005488,GO:0005507,GO:0005575,GO:0005576,GO:0005615,GO:0005622,GO:0005623,GO:0005737,GO:0006066,GO:0006576,GO:0006584,GO:0006589,GO:0006725,GO:0006807,GO:0008150,GO:0008152,GO:0009056,GO:0009058,GO:0009308,GO:0009309,GO:0009712,GO:0009713,GO:0009987,GO:0012505,GO:0012506,GO:0016020,GO:0016491,GO:0016705,GO:0016715,GO:0017144,GO:0018958,GO:…	1.14.17.1	ko:K00503,ko:K15266	Clat_adaptor_s,Cu2_monoox_C,Cu2_monooxygen,DOMON,RrnaAD
g6785.t1	O	Alpha-2-Macroglobulin	CD109	GO:0000768,GO:0001932,GO:0001933,GO:0001942,GO:0002376,GO:0002520,GO:0002521,GO:0002573,GO:0002576,GO:0003674,GO:0005488,GO:0005515,GO:0005575,GO:0005576,GO:0005615,GO:0005622,GO:0005623,GO:0005737,GO:0005886,GO:0006810,GO:0006887,GO:0006949,GO:0006950,GO:0006952,GO:0007275,GO:0008150,GO:0008285,GO:0008544,GO:0009605,GO:0009607,GO:0009617,GO:0009620,GO:0009653,GO:0009888,GO:0009892,GO:0009966,GO:…	-	ko:K06530	A2M,A2M_N,A2M_N_2,A2M_comp,A2M_recep,DUF1891,TLV_coat,Thiol-ester_cl,VIR_N
g6786.t1	O	It is involved in the biological process described with proteolysis	-	GO:0003008,GO:0003674,GO:0003824,GO:0004175,GO:0004222,GO:0005575,GO:0005576,GO:0005615,GO:0006508,GO:0006807,GO:0006928,GO:0007154,GO:0007267,GO:0007600,GO:0008150,GO:0008152,GO:0008233,GO:0008237,GO:0009987,GO:0010467,GO:0016477,GO:0016485,GO:0016787,GO:0019233,GO:0019538,GO:0023052,GO:0030154,GO:0032501,GO:0032502,GO:0040011,GO:0043170,GO:0044238,GO:0044421,GO:0045165,GO:0045168,GO:0046331,GO:…	3.4.24.18,3.4.24.63	ko:K01395,ko:K08606,ko:K19323	Astacin,Atx10homo_assoc,CUB,F5_F8_type_C,MAM,ShK,VWD
g6788.t1	T	to MAP kinase kinase kinase	MAP3K4	GO:0000003,GO:0000131,GO:0000160,GO:0000161,GO:0000165,GO:0000166,GO:0000186,GO:0001672,GO:0001708,GO:0001890,GO:0001932,GO:0001934,GO:0002251,GO:0002376,GO:0002385,GO:0003002,GO:0003006,GO:0003674,GO:0003779,GO:0003824,GO:0004672,GO:0004674,GO:0004690,GO:0004691,GO:0004709,GO:0004713,GO:0005488,GO:0005515,GO:0005524,GO:0005575,GO:0005622,GO:0005623,GO:0005737,GO:0005829,GO:0005933,GO:0005934,GO:…	2.7.11.25	ko:K04428,ko:K11230	CCDC142,CHCH,FNIP,MATH,PAS,Pkinase
g6789.t1	V	Serpin peptidase inhibitor, clade B (ovalbumin), member 1	SERPINB1	GO:0001775,GO:0002252,GO:0002263,GO:0002274,GO:0002275,GO:0002283,GO:0002366,GO:0002376,GO:0002443,GO:0002444,GO:0002446,GO:0003674,GO:0004857,GO:0004866,GO:0004867,GO:0005575,GO:0005576,GO:0005615,GO:0005622,GO:0005623,GO:0005737,GO:0006810,GO:0006887,GO:0006955,GO:0008150,GO:0009892,GO:0009894,GO:0009987,GO:0010466,GO:0010605,GO:0010951,GO:0012505,GO:0016192,GO:0019222,GO:0030141,GO:0030162,GO:…	-	ko:K13963,ko:K13966	Serpin
g6790.t1	V	serine-type endopeptidase inhibitor activity	SERPINB1	GO:0001775,GO:0002252,GO:0002263,GO:0002274,GO:0002275,GO:0002283,GO:0002366,GO:0002376,GO:0002443,GO:0002444,GO:0002446,GO:0003674,GO:0004857,GO:0004866,GO:0004867,GO:0005575,GO:0005576,GO:0005615,GO:0005622,GO:0005623,GO:0005737,GO:0006810,GO:0006887,GO:0006955,GO:0008150,GO:0009892,GO:0009894,GO:0009987,GO:0010466,GO:0010605,GO:0010951,GO:0012505,GO:0016192,GO:0019222,GO:0030141,GO:0030162,GO:…	-	ko:K13963,ko:K13966	Serpin
g7444.t1	T	Natriuretic peptide receptor	NPR1	GO:0000166,GO:0001558,GO:0001653,GO:0001882,GO:0001883,GO:0003008,GO:0003013,GO:0003014,GO:0003018,GO:0003674,GO:0003824,GO:0004383,GO:0004888,GO:0004930,GO:0005488,GO:0005515,GO:0005525,GO:0005575,GO:0005622,GO:0005623,GO:0005737,GO:0005829,GO:0005886,GO:0005887,GO:0006139,GO:0006163,GO:0006164,GO:0006182,GO:0006584,GO:0006725,GO:0006753,GO:0006793,GO:0006796,GO:0006807,GO:0006810,GO:0006935,GO:…	4.6.1.2	ko:K12323,ko:K12324,ko:K12325,ko:K13140	ANF_receptor,Dimer_Tnp_hAT,Guanylate_cyc,HNOBA,Ints3,Pkinase,Pkinase_Tyr
g7445.t1	M	DegT/DnrJ/EryC1/StrS aminotransferase family	-	-	-	-	DegT_DnrJ_EryC1
g7447.t1	Q	It is involved in the biological process described with transmembrane transport	ABCB6	GO:0000041,GO:0000166,GO:0000322,GO:0000323,GO:0000324,GO:0000329,GO:0003674,GO:0003824,GO:0005215,GO:0005488,GO:0005524,GO:0005575,GO:0005622,GO:0005623,GO:0005634,GO:0005654,GO:0005737,GO:0005739,GO:0005740,GO:0005741,GO:0005743,GO:0005768,GO:0005773,GO:0005774,GO:0005783,GO:0005794,GO:0005829,GO:0005886,GO:0006725,GO:0006778,GO:0006779,GO:0006807,GO:0006810,GO:0006811,GO:0006812,GO:0006820,GO:…	-	ko:K05661,ko:K05663	ABC_membrane,ABC_tran,APG9,EamA,MTABC_N,Ribosomal_L44,XLF
g7448.t1	T	Mitogen-activated protein kinase kinase kinase	MAP3K2	GO:0000165,GO:0000186,GO:0000187,GO:0000226,GO:0001568,GO:0001932,GO:0001934,GO:0001944,GO:0003674,GO:0003824,GO:0004672,GO:0004674,GO:0004709,GO:0005488,GO:0005515,GO:0005575,GO:0005576,GO:0005622,GO:0005623,GO:0005634,GO:0005654,GO:0005737,GO:0005829,GO:0006355,GO:0006464,GO:0006468,GO:0006793,GO:0006796,GO:0006807,GO:0006950,GO:0006979,GO:0006996,GO:0007010,GO:0007017,GO:0007154,GO:0007165,GO:…	2.7.11.25	ko:K04420,ko:K04421,ko:K10406,ko:K20606	Ank_5,Kinesin,PB1,Pkinase
g7450.t1	S	proton channel activity	-	-	-	-	DDE_3,DUF4817,HTH_23,HTH_24,HTH_Tnp_Tc3_2,Otopetrin,PAX
g7451.t1	T	plexin-B2-like	PLXNB2	GO:0001838,GO:0001841,GO:0001843,GO:0001932,GO:0002009,GO:0003674,GO:0004888,GO:0005575,GO:0005623,GO:0005886,GO:0005887,GO:0007154,GO:0007155,GO:0007156,GO:0007162,GO:0007165,GO:0007166,GO:0007275,GO:0007399,GO:0007405,GO:0007417,GO:0007420,GO:0008150,GO:0008283,GO:0008360,GO:0009653,GO:0009790,GO:0009792,GO:0009888,GO:0009987,GO:0010720,GO:0010769,GO:0010770,GO:0010975,GO:0010976,GO:0014020,GO:…	-	ko:K06821	Hist_deacetyl,PSI,Pkinase,Plexin_cytopl,Sema,Spc97_Spc98,TIG
g7452.t1	E	K02A2.6-like	-	-	-	-	Asp_protease_2,DDE_Tnp_4,DUF1759,HTH_Tnp_4,PHD,PNMA,RVP_2,RVT_1,SCAN,SRCR,Suppressor_APC,TatD_DNase,Zona_pellucida,gag-asp_proteas,rve,zf-CCHC,zf-H2C2
g7456.t1	-	-	-	-	-	-	RNA_helicase
g7790.t1	U	positive regulation of natural killer cell degranulation	-	GO:0001654,GO:0002790,GO:0003674,GO:0003676,GO:0003677,GO:0005215,GO:0005488,GO:0005515,GO:0005575,GO:0005622,GO:0005623,GO:0005634,GO:0005737,GO:0005768,GO:0005794,GO:0005798,GO:0005802,GO:0006810,GO:0006996,GO:0007275,GO:0007423,GO:0008104,GO:0008150,GO:0008565,GO:0009306,GO:0009987,GO:0010256,GO:0010468,GO:0012505,GO:0012506,GO:0012510,GO:0015031,GO:0015833,GO:0016020,GO:0016043,GO:0016050,GO:…	-	ko:K12391,ko:K12400,ko:K12404	14-3-3,AP4E_app_platf,API5,Adaptin_N,Alpha_adaptinC2,DUF608,GAT,Glyco_hydr_116N,RRM_1,RVT_1,VHS
g7791.t1	S	Interferon-inducible GTPase (IIGP)	Ifggb1	GO:0002376,GO:0003674,GO:0003824,GO:0003924,GO:0005575,GO:0005622,GO:0005623,GO:0005737,GO:0005783,GO:0005789,GO:0006950,GO:0006952,GO:0006955,GO:0008150,GO:0009605,GO:0009607,GO:0009615,GO:0009617,GO:0009987,GO:0010033,GO:0012505,GO:0016020,GO:0016462,GO:0016787,GO:0016817,GO:0016818,GO:0017111,GO:0031984,GO:0034097,GO:0034341,GO:0035455,GO:0035456,GO:0035458,GO:0042175,GO:0042221,GO:0043207,GO:…	-	-	IIGP
g7796.t1	S	50S ribosome-binding GTPase	-	-	-	-	AIG1,CD20,DDE_Tnp_1_7,MMR_HSR1,Septin,fn3
g7797.t1	-	-	-	-	-	-	AIG1,CD20,DDE_Tnp_1_7,MMR_HSR1,Septin,fn3
g7799.t1	O	Astacin (Peptidase family M12A)	-	-	3.4.24.21	ko:K08076	Astacin,CUB,ShK
g7800.t1	T	Fibronectin type 3 domain	-	-	-	ko:K16353,ko:K19599	7tm_2,AIG1,F5_F8_type_C,Fibrinogen_C,Furin-like_2,GAIN,GPS,HRM,I-set,Ig_3,Septin,TLD,TNFR_c6,fn3,ig
g7801.t1	-	-	-	-	-	-	AIG1,CD20,DDE_Tnp_1_7,MMR_HSR1,Septin,fn3
g7802.t1	S	50S ribosome-binding GTPase	-	-	-	-	AIG1,CD20,DDE_Tnp_1_7,MMR_HSR1,Septin,fn3
g7803.t1	Z	Belongs to the TRAFAC class TrmE-Era-EngA-EngB-Septin- like GTPase superfamily. Septin GTPase family	-	-	-	-	AIG1,Cadherin,I-set,Ig_3,Lipase_GDSL,MAM,MMR_HSR1,PRY,Pkinase,SPRY,Septin,fn3
g7805.t1	L	Reverse transcriptase (RNA-dependent DNA polymerase)	-	-	-	-	Asp_protease_2,Baculo_F,RVP,RVT_1,Retrotrans_gag,SAP,gag-asp_proteas,rve,zf-CCHC,zf-CCHC_3,zf-H2C2
g7870.t1	T	Heme NO binding associated	-	GO:0003674,GO:0003824,GO:0004383,GO:0005575,GO:0005622,GO:0005623,GO:0005737,GO:0005829,GO:0005886,GO:0005887,GO:0006139,GO:0006163,GO:0006164,GO:0006182,GO:0006725,GO:0006753,GO:0006793,GO:0006796,GO:0006807,GO:0007154,GO:0007165,GO:0008074,GO:0008150,GO:0008152,GO:0009058,GO:0009117,GO:0009150,GO:0009152,GO:0009165,GO:0009187,GO:0009190,GO:0009259,GO:0009260,GO:0009975,GO:0009987,GO:0016020,GO:…	4.6.1.2	ko:K12323,ko:K12324	ANF_receptor,Ank_2,Guanylate_cyc,HNOBA,Pkinase,Pkinase_Tyr
g7871.t1	O	homolog, subfamily B, member 5	DNAJB5	GO:0000122,GO:0000226,GO:0000278,GO:0000281,GO:0000910,GO:0000923,GO:0002682,GO:0002684,GO:0003674,GO:0005488,GO:0005515,GO:0005575,GO:0005622,GO:0005623,GO:0005634,GO:0005737,GO:0005815,GO:0005816,GO:0005829,GO:0005856,GO:0006355,GO:0006357,GO:0006417,GO:0006448,GO:0006457,GO:0006464,GO:0006807,GO:0006810,GO:0006950,GO:0006986,GO:0006996,GO:0007010,GO:0007017,GO:0007049,GO:0007097,GO:0007163,GO:…	-	ko:K09507,ko:K09510,ko:K09511,ko:K09519,ko:K17867	DnaJ,DnaJ_C,UBA_4,UBX,zf-CSL
g7879.t1	S	Leucine rich repeat and sterile alpha motif containing 1	LRSAM1	GO:0000209,GO:0002831,GO:0002833,GO:0003674,GO:0003824,GO:0004842,GO:0005575,GO:0005622,GO:0005623,GO:0005737,GO:0005829,GO:0005886,GO:0006464,GO:0006807,GO:0006810,GO:0006897,GO:0007154,GO:0007165,GO:0008104,GO:0008150,GO:0008152,GO:0009056,GO:0009057,GO:0009893,GO:0009894,GO:0009896,GO:0009987,GO:0010506,GO:0010508,GO:0010638,GO:0015031,GO:0015833,GO:0016020,GO:0016032,GO:0016192,GO:0016239,GO:…	2.3.2.27	ko:K10641	Ank_2,Ank_4,COR,LRR_1,LRR_4,LRR_6,LRR_8,Mab-21,PAX,Pkinase,Roc,SAM_1,SAM_2,zf-C3HC4_3
g7880.t1	O	zinc metalloproteinase	MEP1B	GO:0003674,GO:0003824,GO:0004175,GO:0004222,GO:0005488,GO:0005515,GO:0005575,GO:0005623,GO:0005886,GO:0005887,GO:0006508,GO:0006807,GO:0006810,GO:0007275,GO:0007610,GO:0007631,GO:0008150,GO:0008152,GO:0008233,GO:0008237,GO:0016020,GO:0016021,GO:0016787,GO:0017090,GO:0019538,GO:0031224,GO:0031226,GO:0032501,GO:0032502,GO:0032991,GO:0035295,GO:0042755,GO:0042802,GO:0043050,GO:0043170,GO:0044238,GO:…	3.4.24.21,3.4.24.63	ko:K08076,ko:K08606	Astacin,EGF,Histone,MAM,ShK,TSP_1,Trypsin
g7881.t1	-	-	-	-	-	-	zf-CCHC
g7882.t1	L	K02A2.6-like	-	-	-	-	Asp_protease,Asp_protease_2,PNMA,RVP,RVP_2,RVT_1,RVT_3,Retrotrans_gag,SCAN,gag-asp_proteas,rve,zf-CCHC,zf-H2C2,zf-RVT
g7883.t1	L	Reverse transcriptase (RNA-dependent DNA polymerase)	-	-	-	-	Asp_protease_2,Baculo_F,RVP,RVT_1,Retrotrans_gag,SAP,gag-asp_proteas,rve,zf-CCHC,zf-CCHC_3,zf-H2C2
g7884.t1	E	K02A2.6-like	-	-	-	-	Asp_protease_2,DDE_Tnp_4,DUF1759,HTH_Tnp_4,PHD,PNMA,RVP_2,RVT_1,SCAN,SRCR,Suppressor_APC,TatD_DNase,Zona_pellucida,gag-asp_proteas,rve,zf-CCHC,zf-H2C2
g8406.t1	-	-	-	-	-	-	RNA_helicase
g8407.t1	L	transposition, RNA-mediated	-	-	-	-	Baculo_F,Chromo,Pkinase,rve
g8410.t1	T	BTB And C-terminal Kelch	KLHL3	GO:0000003,GO:0000151,GO:0000209,GO:0001655,GO:0001725,GO:0001822,GO:0002009,GO:0003006,GO:0003008,GO:0003014,GO:0003096,GO:0003674,GO:0003779,GO:0005198,GO:0005488,GO:0005515,GO:0005575,GO:0005576,GO:0005622,GO:0005623,GO:0005737,GO:0005829,GO:0005856,GO:0006464,GO:0006508,GO:0006511,GO:0006807,GO:0006810,GO:0006811,GO:0006812,GO:0006814,GO:0006996,GO:0007010,GO:0007049,GO:0007275,GO:0007276,GO:…	-	ko:K10443,ko:K10457	BACK,BTB,DDE_Tnp_IS1595,HGTP_anticodon,Kelch_1,THAP,ThiF,Tnp_P_element,Tnp_P_element_C
g8411.t1	M	Apolipoprotein D	Apod	GO:0000302,GO:0001817,GO:0001818,GO:0001952,GO:0001953,GO:0002682,GO:0002683,GO:0002685,GO:0002686,GO:0003674,GO:0005488,GO:0005496,GO:0005575,GO:0005576,GO:0005615,GO:0005622,GO:0005623,GO:0005737,GO:0005783,GO:0005829,GO:0005840,GO:0005975,GO:0005996,GO:0006006,GO:0006629,GO:0006950,GO:0006979,GO:0007162,GO:0007275,GO:0007399,GO:0007417,GO:0007420,GO:0007568,GO:0008150,GO:0008152,GO:0008285,GO:…	-	ko:K03098,ko:K18271	Lipocalin,Lipocalin_2,Triabin
g8412.t1	S	Sperm-tail PG-rich repeat	STPG2	-	-	-	SHIPPO-rpt
g8414.t1	O	Belongs to the peptidase C1 family	-	GO:0003674,GO:0003824,GO:0004175,GO:0004197,GO:0005575,GO:0005576,GO:0006508,GO:0006807,GO:0008150,GO:0008152,GO:0008233,GO:0008234,GO:0009056,GO:0009057,GO:0009314,GO:0009411,GO:0009416,GO:0009628,GO:0009987,GO:0010212,GO:0010332,GO:0016787,GO:0019538,GO:0030163,GO:0034644,GO:0043170,GO:0044237,GO:0044238,GO:0044248,GO:0044257,GO:0044260,GO:0044265,GO:0044267,GO:0050896,GO:0051603,GO:0051716,GO:…	3.4.22.1	ko:K01363	Alg14,Fra10Ac1,HECT_2,Inhibitor_I29,Peptidase_C1,Propeptide_C1
g8415.t1	O	ATPase activity	CLPB	GO:0006950,GO:0008150,GO:0009266,GO:0009408,GO:0009628,GO:0009987,GO:0033554,GO:0034605,GO:0050896,GO:0051716	-	ko:K03695	AAA_2,Ank,Ank_2,Ank_3,Ank_4,Ank_5,ClpB_D2-small,UbiA
g8416.t1	O	Protease, serine 56	PRSS56	GO:0001654,GO:0003674,GO:0003824,GO:0004175,GO:0004252,GO:0005575,GO:0005622,GO:0005623,GO:0005737,GO:0005783,GO:0006508,GO:0006807,GO:0007275,GO:0007423,GO:0008150,GO:0008152,GO:0008233,GO:0008236,GO:0012505,GO:0016787,GO:0017171,GO:0019538,GO:0032501,GO:0032502,GO:0043010,GO:0043170,GO:0043226,GO:0043227,GO:0043229,GO:0043231,GO:0044238,GO:0044424,GO:0044444,GO:0044464,GO:0048513,GO:0048731,GO:…	-	-	TSP_1,Trypsin
g8417.t1	P	Transmembrane transporter activity. It is involved in the biological process described with	SLC26A2	GO:0000003,GO:0001101,GO:0001503,GO:0002376,GO:0002931,GO:0003006,GO:0003008,GO:0003674,GO:0003774,GO:0003824,GO:0005215,GO:0005216,GO:0005253,GO:0005254,GO:0005310,GO:0005342,GO:0005452,GO:0005488,GO:0005515,GO:0005575,GO:0005576,GO:0005615,GO:0005622,GO:0005623,GO:0005737,GO:0005886,GO:0005887,GO:0005902,GO:0005903,GO:0005929,GO:0006082,GO:0006139,GO:0006163,GO:0006164,GO:0006725,GO:0006753,GO:…	-	ko:K14453,ko:K14700,ko:K14701,ko:K14702,ko:K14703,ko:K14704,ko:K14707,ko:K17341	I-set,STAS,Sulfate_transp,TMEM89
g8957.t1	E	Belongs to the peptidase S1 family	CTRC	GO:0003674,GO:0003824,GO:0005575,GO:0005576,GO:0006508,GO:0006725,GO:0006766,GO:0006767,GO:0006807,GO:0006873,GO:0006874,GO:0006875,GO:0008150,GO:0008152,GO:0008233,GO:0009235,GO:0009987,GO:0016787,GO:0017144,GO:0019538,GO:0019725,GO:0030003,GO:0033013,GO:0042592,GO:0043170,GO:0044237,GO:0044238,GO:0044281,GO:0046483,GO:0048878,GO:0050801,GO:0051186,GO:0055065,GO:0055074,GO:0055080,GO:0055082,GO:…	3.4.21.1,3.4.21.2,3.4.21.36,3.4.21.71,3.4.21.99	ko:K01310,ko:K01311,ko:K01326,ko:K01346,ko:K09632,ko:K20751	CUB,TIL,Trypsin
g8958.t1	O	zinc ion binding	RNF39	-	2.3.2.27,2.7.7.6	ko:K03006,ko:K04617,ko:K10651,ko:K12009,ko:K12015	Bromodomain,MATH,PHD,PRY,PYRIN,Rpr2,SPRY,SRCR,V-set,zf-B_box,zf-C3HC4,zf-C3HC4_2,zf-C3HC4_3,zf-C3HC4_4,zf-RING_2,zf-RING_UBOX
g8959.t1	T	Kelch repeat and BTB	KBTBD2	GO:0000151,GO:0005575,GO:0005622,GO:0005623,GO:0031461,GO:0031463,GO:0032991,GO:0044424,GO:0044464,GO:1902494,GO:1990234	-	ko:K10470,ko:K10475,ko:K21912	BACK,BTB,DUF4470,Kelch_1,Kelch_6
g8960.t1	O	K02A2.6-like	-	-	-	-	Asp_protease_2,BESS,Baculo_F,Dimer_Tnp_hAT,HMGL-like,MADF_DNA_bdg,Macro,OTU,PNP_UDP_1,RVP,RVT_1,Retrotrans_gag,SCAN,Spuma_A9PTase,rve,zf-CCHC,zf-H2C2
g8962.t1	B	Jerky protein homolog-like	-	-	-	-	DDE_1,DDE_3,DUF4551,HTH_Tnp_Tc5,HTH_psq,Myb_DNA-bind_4
g8964.t1	T	hepatocyte growth factor receptor	MET	GO:0000003,GO:0000122,GO:0000165,GO:0000187,GO:0000902,GO:0000904,GO:0001678,GO:0001763,GO:0001764,GO:0001817,GO:0001818,GO:0001885,GO:0001886,GO:0001889,GO:0001890,GO:0001932,GO:0001933,GO:0001934,GO:0002009,GO:0002064,GO:0003006,GO:0003008,GO:0003012,GO:0003013,GO:0003015,GO:0003158,GO:0003382,GO:0003674,GO:0003824,GO:0004672,GO:0004713,GO:0004714,GO:0004888,GO:0005008,GO:0005085,GO:0005088,GO:…	2.7.10.1	ko:K05088,ko:K05099,ko:K05100,ko:K05119,ko:K08252	F-actin_cap_A,Gly_rich,Integrin_alpha2,Integrin_beta,Ldl_recept_a,MAM,PSI,Pkinase_Tyr,Sema,TIG,fn3
g8965.t1	L	Integrase core domain	-	-	-	-	Asp_protease_2,Glycoprotein_B,PNMA,RVT_1,Retrotrans_gag,gag-asp_proteas,rve,zf-CCHC,zf-H2C2
g9026.t1	O	It is involved in the biological process described with proteolysis	mep1b	GO:0003008,GO:0003674,GO:0003824,GO:0004175,GO:0004222,GO:0005575,GO:0005576,GO:0005615,GO:0006508,GO:0006807,GO:0006928,GO:0007154,GO:0007267,GO:0007600,GO:0008150,GO:0008152,GO:0008233,GO:0008237,GO:0009987,GO:0010467,GO:0016477,GO:0016485,GO:0016787,GO:0019233,GO:0019538,GO:0023052,GO:0030154,GO:0032501,GO:0032502,GO:0040011,GO:0043170,GO:0044238,GO:0044421,GO:0045165,GO:0045168,GO:0046331,GO:…	3.4.24.63	ko:K08606	Astacin,DUF1891,MAM
g9027.t1	O	Astacin (Peptidase family M12A)	-	-	3.4.24.21	ko:K08076	Astacin,CUB,F5_F8_type_C,MAM,Ricin_B_lectin,ShK,Sushi
g9028.t1	T	tyrosine kinase 3	FLT3	GO:0001775,GO:0001776,GO:0001817,GO:0001818,GO:0001819,GO:0001894,GO:0001932,GO:0001934,GO:0002244,GO:0002318,GO:0002320,GO:0002328,GO:0002376,GO:0002520,GO:0002521,GO:0002572,GO:0002682,GO:0002683,GO:0002694,GO:0002695,GO:0002791,GO:0002793,GO:0003674,GO:0003824,GO:0004672,GO:0004713,GO:0004714,GO:0004888,GO:0004896,GO:0005021,GO:0005102,GO:0005488,GO:0005515,GO:0005575,GO:0005622,GO:0005623,GO:…	2.7.10.1	ko:K04363,ko:K05089,ko:K05090,ko:K05091,ko:K05092,ko:K05096,ko:K05097,ko:K05098	I-set,Ig_3,Myb_DNA-bind_4,Pkinase_Tyr,UBA_4,ig
g9029.t1	O	Astacin (Peptidase family M12A)	-	-	-	-	Astacin,CUB
g9031.t1	S	Guanylate-binding protein, N-terminal domain	ATL2	GO:0000137,GO:0000166,GO:0000226,GO:0000902,GO:0000904,GO:0001558,GO:0001882,GO:0001883,GO:0003674,GO:0003824,GO:0003924,GO:0005488,GO:0005515,GO:0005525,GO:0005575,GO:0005622,GO:0005623,GO:0005737,GO:0005783,GO:0005789,GO:0005794,GO:0005795,GO:0006996,GO:0007010,GO:0007017,GO:0007019,GO:0007029,GO:0007030,GO:0007275,GO:0007399,GO:0007409,GO:0007416,GO:0007517,GO:0007528,GO:0008150,GO:0008361,GO:…	-	ko:K17339	Calreticulin,GBP,GBP_C,Hormone_recep,zf-C4
g9032.t1	O	Zinc-dependent metalloprotease	mep1b	GO:0006810,GO:0006897,GO:0006909,GO:0008150,GO:0016192,GO:0051179,GO:0051234,GO:0098657	3.4.24.63	ko:K08606	Arf,Astacin,DUF1891,MAM
g9035.t1	M	GTPase activity	-	-	-	ko:K17339	GBP
g9036.t1	CH	DNA binding	-	-	-	-	CENP-B_N,DDE_1,DDE_Tnp_4,DUF4371,Dimer_Tnp_hAT,HTH_Tnp_Tc5,MADF_DNA_bdg
g9811.t1	S	WD domain, G-beta repeat	CFAP44	GO:0001539,GO:0006928,GO:0008150,GO:0009987,GO:0040011,GO:0048870,GO:0051179,GO:0051674,GO:0060285	-	-	DAZAP2,DUF2804,MTHFR,Nuf2,WD40
g9813.t1	CG	Belongs to the UDP-glycosyltransferase family	-	-	2.4.1.121,2.4.1.17	ko:K00699,ko:K13692	UDPGT
g9814.t1	S	DDE superfamily endonuclease	-	-	-	-	DDE_Tnp_4
g9816.t1	F	cytidylate kinase activity	AK7	GO:0000003,GO:0000226,GO:0001578,GO:0002376,GO:0002437,GO:0003341,GO:0003351,GO:0003674,GO:0003824,GO:0004017,GO:0004127,GO:0004550,GO:0005575,GO:0005622,GO:0005623,GO:0005737,GO:0005829,GO:0006139,GO:0006165,GO:0006725,GO:0006753,GO:0006793,GO:0006796,GO:0006807,GO:0006928,GO:0006950,GO:0006952,GO:0006954,GO:0006955,GO:0006996,GO:0007010,GO:0007017,GO:0007018,GO:0007275,GO:0007276,GO:0007283,GO:…	2.7.4.3	ko:K00939	AAA,AAA_17,AAA_18,ADK,ADK_lid,Dpy-30,FA,FERM_C,FERM_M,FERM_N,Hydin_ADK,SKI
g9817.t1	S	Expressed protein	DAG7	-	-	-	DPBB_1,LysM
g9819.t1	S	Enkurin, TRPC channel interacting protein	ENKUR	GO:0001669,GO:0003674,GO:0005488,GO:0005515,GO:0005516,GO:0005575,GO:0005622,GO:0005623,GO:0005737,GO:0005929,GO:0012505,GO:0030141,GO:0031410,GO:0031514,GO:0031982,GO:0036126,GO:0042995,GO:0043226,GO:0043227,GO:0043229,GO:0044422,GO:0044424,GO:0044441,GO:0044444,GO:0044463,GO:0044464,GO:0097223,GO:0097228,GO:0097708,GO:0097729,GO:0099503,GO:0120025,GO:0120038	-	-	Enkurin
g9820.t1	U	DnaJ molecular chaperone homology domain	-	-	-	-	DnaJ
g9980.t1	S	Galactose-3-O-sulfotransferase	-	-	2.8.2.11	ko:K01019,ko:K09675	Gal-3-0_sulfotr
g9984.t1	K	helix loop helix domain	NHLH1	GO:0000976,GO:0000977,GO:0000981,GO:0001012,GO:0001067,GO:0001228,GO:0003674,GO:0003676,GO:0003677,GO:0003690,GO:0003700,GO:0005488,GO:0005575,GO:0005622,GO:0005623,GO:0005634,GO:0006139,GO:0006351,GO:0006355,GO:0006357,GO:0006366,GO:0006725,GO:0006807,GO:0007275,GO:0007399,GO:0007417,GO:0008150,GO:0008152,GO:0009058,GO:0009059,GO:0009889,GO:0009891,GO:0009893,GO:0009987,GO:0010467,GO:0010468,GO:…	-	ko:K09075	HLH
g9986.t1	O	Zinc-dependent metalloprotease	nas-15	GO:0005575,GO:0005622,GO:0005623,GO:0005737,GO:0007275,GO:0007610,GO:0007631,GO:0008150,GO:0012505,GO:0030133,GO:0031410,GO:0031982,GO:0032501,GO:0032502,GO:0035295,GO:0042755,GO:0043050,GO:0043226,GO:0043227,GO:0043229,GO:0044424,GO:0044444,GO:0044464,GO:0048565,GO:0048731,GO:0048856,GO:0055123,GO:0060465,GO:0097708	3.4.24.21,3.4.24.63,3.4.24.66,3.4.24.67	ko:K08076,ko:K08606,ko:K13047,ko:K18542,ko:K18543	Astacin,CUB,DERM,F5_F8_type_C,Laminin_G_3,ShK,TSP_1
g9987.t1	O	Fungal-type cellulose-binding domain	-	-	-	-	CBM_1,Glyco_hydro_45,NACHT_N
g9989.t1	I	phosphatidylinositol phospholipase C activity. It is involved in the biological process described with intracellular signal transduction	PLCB2	GO:0000003,GO:0000086,GO:0000228,GO:0000278,GO:0000785,GO:0000790,GO:0001101,GO:0001556,GO:0001580,GO:0001775,GO:0001817,GO:0001819,GO:0001932,GO:0001934,GO:0002028,GO:0002262,GO:0002376,GO:0002520,GO:0002521,GO:0002573,GO:0002682,GO:0002683,GO:0002685,GO:0002686,GO:0002691,GO:0002692,GO:0003006,GO:0003008,GO:0003013,GO:0003073,GO:0003674,GO:0003824,GO:0004435,GO:0004620,GO:0004629,GO:0005096,GO:…	3.1.4.11	ko:K05857,ko:K05858,ko:K19006	ANF_receptor,C2,DUF1154,EF-hand_like,FHA,PH,PH_12,PI-PLC-X,PI-PLC-Y,PLC-beta_C,adh_short
g10097.t1	L	Reverse transcriptase (RNA-dependent DNA polymerase)	-	-	-	-	Asp_protease_2,Baculo_F,RVP,RVT_1,Retrotrans_gag,SAP,gag-asp_proteas,rve,zf-CCHC,zf-CCHC_3,zf-H2C2
g10098.t1	S	biological adhesion	-	-	-	ko:K03900,ko:K21443	C8,CAP,CUE,F5_F8_type_C,Fibrinogen_C,GLEYA,I-set,Mucin2_WxxW,TIL,TILa,TSP_1,VWC,VWD
g10100.t1	T	Serpentine type 7TM GPCR chemoreceptor Srv	OPN4	GO:0000122,GO:0000323,GO:0000902,GO:0000904,GO:0001654,GO:0001745,GO:0001750,GO:0001751,GO:0001754,GO:0003008,GO:0003674,GO:0004888,GO:0004930,GO:0005488,GO:0005501,GO:0005502,GO:0005515,GO:0005575,GO:0005622,GO:0005623,GO:0005737,GO:0005764,GO:0005767,GO:0005768,GO:0005769,GO:0005770,GO:0005771,GO:0005773,GO:0005783,GO:0005790,GO:0005791,GO:0005886,GO:0005887,GO:0005929,GO:0006355,GO:0006357,GO:…	2.1.2.9	ko:K00604,ko:K04255,ko:K13802,ko:K19867	7tm_1,COMM_domain,DUF4749,Formyl_trans_C,Formyl_trans_N,LIM,MoCF_biosynth,Nup88,PDZ,RVT_2
g10101.t1	EI	Acyl-CoA dehydrogenase, C-terminal domain	IVD	GO:0000166,GO:0003674,GO:0003824,GO:0003853,GO:0003995,GO:0005488,GO:0005524,GO:0005575,GO:0005622,GO:0005623,GO:0005634,GO:0005654,GO:0005737,GO:0005739,GO:0005740,GO:0005759,GO:0006082,GO:0006139,GO:0006163,GO:0006195,GO:0006520,GO:0006551,GO:0006552,GO:0006629,GO:0006631,GO:0006635,GO:0006637,GO:0006725,GO:0006732,GO:0006753,GO:0006790,GO:0006793,GO:0006796,GO:0006807,GO:0008144,GO:0008150,GO:…	1.3.8.4	ko:K00253	Acyl-CoA_dh_1,Acyl-CoA_dh_2,Acyl-CoA_dh_M,Acyl-CoA_dh_N,C2,HpaB_N,RVP_2,Retrotrans_gag,SAP,TetR_N,Trypsin,zf-MIZ
g10107.t1	S	Catalytic LigB subunit of aromatic ring-opening dioxygenase	-	-	-	ko:K18626	LigB
g10108.t1	Y	iron-sulfur cluster assembly	NARFL	GO:0001525,GO:0001568,GO:0001666,GO:0001944,GO:0002040,GO:0002244,GO:0002376,GO:0002520,GO:0003674,GO:0003824,GO:0003954,GO:0005488,GO:0005515,GO:0005521,GO:0005575,GO:0005622,GO:0005623,GO:0005634,GO:0005638,GO:0005652,GO:0005730,GO:0005737,GO:0005829,GO:0005856,GO:0005882,GO:0006790,GO:0006807,GO:0006950,GO:0007275,GO:0008150,GO:0008152,GO:0008901,GO:0009628,GO:0009653,GO:0009987,GO:0010467,GO:…	-	ko:K22125	C2,FAD_binding_1,FHA,Fe_hyd_SSU,Fe_hyd_lg_C,Fer2_4,Fer4,Fer4_21,Fer4_7,Fer4_9,FerA,FerB,FerI,Filamin,Flavodoxin_1,Forkhead,Mesothelin,NADH-G_4Fe-4S_3,NAD_binding_1,Sedlin_N
g10108.t2	Y	Cytosolic Fe-S cluster assembly factor NARFL	NARFL	GO:0001525,GO:0001568,GO:0001666,GO:0001944,GO:0002040,GO:0002244,GO:0002376,GO:0002520,GO:0003674,GO:0003824,GO:0003954,GO:0005488,GO:0005575,GO:0005622,GO:0005623,GO:0005737,GO:0005829,GO:0006790,GO:0006807,GO:0006950,GO:0007275,GO:0008150,GO:0008152,GO:0008901,GO:0009628,GO:0009653,GO:0009987,GO:0010467,GO:0010468,GO:0016020,GO:0016043,GO:0016226,GO:0016491,GO:0016651,GO:0016695,GO:0016699,GO:…	-	-	FAD_binding_1,Fe_hyd_SSU,Fe_hyd_lg_C,Fer2_4,Fer4,Fer4_21,Fer4_7,Fer4_9,Filamin,Flavodoxin_1,Mesothelin,NADH-G_4Fe-4S_3,NAD_binding_1,Sedlin_N
g10527.t1	L	ATP-dependent RNA helicase of the SFI superfamily, required for nonsense mediated mRNA decay and for	UPF1	GO:0000003,GO:0000166,GO:0000184,GO:0000228,GO:0000288,GO:0000291,GO:0000294,GO:0000723,GO:0000781,GO:0000784,GO:0000785,GO:0000932,GO:0000956,GO:0001101,GO:0001666,GO:0002237,GO:0003006,GO:0003674,GO:0003676,GO:0003677,GO:0003682,GO:0003723,GO:0003724,GO:0003729,GO:0003824,GO:0004004,GO:0004386,GO:0005488,GO:0005515,GO:0005524,GO:0005575,GO:0005622,GO:0005623,GO:0005634,GO:0005654,GO:0005681,GO:…	-	ko:K14326	AAA_11,AAA_12,AAA_30,DUF2075,Fungal_trans,Helicase_RecD,PPR,ResIII,UPF1_Zn_bind
g10528.t1	L	nuclear-transcribed mRNA catabolic process, endonucleolytic cleavage-dependent decay	UPF1	GO:0000003,GO:0000166,GO:0000184,GO:0000228,GO:0000288,GO:0000291,GO:0000294,GO:0000723,GO:0000781,GO:0000784,GO:0000785,GO:0000932,GO:0000956,GO:0001101,GO:0001666,GO:0002237,GO:0003006,GO:0003674,GO:0003676,GO:0003677,GO:0003682,GO:0003723,GO:0003724,GO:0003729,GO:0003824,GO:0004004,GO:0004386,GO:0005488,GO:0005515,GO:0005524,GO:0005575,GO:0005622,GO:0005623,GO:0005634,GO:0005654,GO:0005681,GO:…	-	ko:K14326	AAA_11,AAA_12,AAA_30,DUF2075,Fungal_trans,Helicase_RecD,PPR,ResIII,UPF1_Zn_bind
g10529.t1	T	Natriuretic peptide receptor 1	NPR1	GO:0000166,GO:0001558,GO:0001653,GO:0001882,GO:0001883,GO:0003008,GO:0003013,GO:0003014,GO:0003018,GO:0003674,GO:0003824,GO:0004383,GO:0004888,GO:0004930,GO:0005488,GO:0005515,GO:0005525,GO:0005575,GO:0005622,GO:0005623,GO:0005737,GO:0005829,GO:0005886,GO:0005887,GO:0006139,GO:0006163,GO:0006164,GO:0006182,GO:0006584,GO:0006725,GO:0006753,GO:0006793,GO:0006796,GO:0006807,GO:0006810,GO:0006935,GO:…	4.6.1.2	ko:K12323,ko:K12324,ko:K12325	ANF_receptor,Dimer_Tnp_hAT,Guanylate_cyc,HNOBA,Pkinase,Pkinase_Tyr
g10529.t2	T	Natriuretic peptide receptor	NPR1	GO:0000166,GO:0001558,GO:0001653,GO:0001882,GO:0001883,GO:0003008,GO:0003013,GO:0003014,GO:0003018,GO:0003674,GO:0003824,GO:0004383,GO:0004888,GO:0004930,GO:0005488,GO:0005515,GO:0005525,GO:0005575,GO:0005622,GO:0005623,GO:0005737,GO:0005829,GO:0005886,GO:0005887,GO:0006139,GO:0006163,GO:0006164,GO:0006182,GO:0006584,GO:0006725,GO:0006753,GO:0006793,GO:0006796,GO:0006807,GO:0006810,GO:0006935,GO:…	4.6.1.2	ko:K12323,ko:K12324,ko:K12325,ko:K13140	ANF_receptor,Dimer_Tnp_hAT,Guanylate_cyc,HNOBA,Ints3,Pkinase,Pkinase_Tyr
g10530.t1	-	-	-	-	-	-	DUF1258,HTH_23,HTH_29,Peptidase_C48,Transposase_21
g10533.t1	T	It is involved in the biological process described with	-	GO:0006950,GO:0006952,GO:0008150,GO:0009605,GO:0009607,GO:0009617,GO:0042742,GO:0043207,GO:0050830,GO:0050896,GO:0051704,GO:0051707,GO:0098542	1.11.1.7	ko:K19511	An_peroxidase,Ank_2,Ank_4,IgGFc_binding,Lectin_C,Mucin2_WxxW
g10534.t1	O	endopeptidase inhibitor activity	CD109	GO:0000768,GO:0001932,GO:0001933,GO:0001942,GO:0002376,GO:0002520,GO:0002521,GO:0002573,GO:0002576,GO:0003674,GO:0005488,GO:0005515,GO:0005575,GO:0005576,GO:0005622,GO:0005623,GO:0005737,GO:0005886,GO:0006810,GO:0006887,GO:0006949,GO:0006950,GO:0006952,GO:0007275,GO:0008150,GO:0008285,GO:0008544,GO:0009605,GO:0009607,GO:0009617,GO:0009653,GO:0009888,GO:0009892,GO:0009966,GO:0009968,GO:0009987,GO:…	-	ko:K03910,ko:K06530	A2M,A2M_N,A2M_N_2,A2M_comp,A2M_recep,DUF1891,TLV_coat,Thiol-ester_cl
g10536.t1	O	Papain family cysteine protease	-	GO:0000323,GO:0003674,GO:0003824,GO:0004175,GO:0004197,GO:0005575,GO:0005576,GO:0005615,GO:0005622,GO:0005623,GO:0005737,GO:0005764,GO:0005773,GO:0005829,GO:0006508,GO:0006807,GO:0008150,GO:0008152,GO:0008233,GO:0008234,GO:0009056,GO:0009057,GO:0009987,GO:0016787,GO:0019538,GO:0030163,GO:0043170,GO:0043226,GO:0043227,GO:0043229,GO:0043231,GO:0044237,GO:0044238,GO:0044248,GO:0044257,GO:0044260,GO:…	3.4.22.1,3.4.22.15	ko:K01363,ko:K01365	Alg14,Fra10Ac1,Glyco_hydro_17,Inhibitor_I29,PPR_2,PPR_3,Peptidase_C1,Profilin,Propeptide_C1
g10537.t1	J	proton channel activity	-	-	-	-	Asp_protease_2,DDE_3,HTH_28,HTH_Tnp_Tc3_1,HTH_Tnp_Tc3_2,MSA-2c,Otopetrin,Retrotrans_gag,WSN,Y_phosphatase
g11244.t1	L	transposition	-	-	-	-	RVT_1,rve,zf-CCHC
g11245.t1	O	A-macroglobulin receptor	CD109	GO:0000768,GO:0001932,GO:0001933,GO:0001942,GO:0002376,GO:0002520,GO:0002521,GO:0002573,GO:0002576,GO:0003674,GO:0005488,GO:0005515,GO:0005575,GO:0005576,GO:0005615,GO:0005622,GO:0005623,GO:0005737,GO:0005886,GO:0006810,GO:0006887,GO:0006949,GO:0006950,GO:0006952,GO:0007275,GO:0008150,GO:0008285,GO:0008544,GO:0009605,GO:0009607,GO:0009617,GO:0009620,GO:0009653,GO:0009888,GO:0009892,GO:0009966,GO:…	-	ko:K03910,ko:K06530	A2M,A2M_N,A2M_N_2,A2M_comp,A2M_recep,DUF1891,TLV_coat,Thiol-ester_cl,VIR_N
g11246.t1	O	endopeptidase inhibitor activity	CD109	GO:0000768,GO:0001932,GO:0001933,GO:0001942,GO:0002376,GO:0002520,GO:0002521,GO:0002573,GO:0002576,GO:0003674,GO:0005488,GO:0005515,GO:0005575,GO:0005576,GO:0005622,GO:0005623,GO:0005737,GO:0005886,GO:0006810,GO:0006887,GO:0006949,GO:0006950,GO:0006952,GO:0007275,GO:0008150,GO:0008285,GO:0008544,GO:0009605,GO:0009607,GO:0009617,GO:0009653,GO:0009888,GO:0009892,GO:0009966,GO:0009968,GO:0009987,GO:…	-	ko:K06530	A2M,A2M_N,A2M_N_2,A2M_comp,A2M_recep,DUF1891,TLV_coat,Thiol-ester_cl,VIR_N
g11247.t1	-	-	-	-	-	-	-
g11248.t1	O	Alpha-2-Macroglobulin	CD109	GO:0000768,GO:0001932,GO:0001933,GO:0001942,GO:0002376,GO:0002520,GO:0002521,GO:0002573,GO:0002576,GO:0003674,GO:0005488,GO:0005515,GO:0005575,GO:0005576,GO:0005615,GO:0005622,GO:0005623,GO:0005737,GO:0005886,GO:0006810,GO:0006887,GO:0006949,GO:0006950,GO:0006952,GO:0007275,GO:0008150,GO:0008285,GO:0008544,GO:0009605,GO:0009607,GO:0009617,GO:0009620,GO:0009653,GO:0009888,GO:0009892,GO:0009966,GO:…	-	ko:K06530	A2M,A2M_N,A2M_N_2,A2M_comp,A2M_recep,DUF1891,TLV_coat,Thiol-ester_cl,VIR_N
g11248.t2	O	A-macroglobulin receptor	CD109	GO:0000768,GO:0001932,GO:0001933,GO:0001942,GO:0002376,GO:0002520,GO:0002521,GO:0002573,GO:0002576,GO:0003674,GO:0005488,GO:0005515,GO:0005575,GO:0005576,GO:0005615,GO:0005622,GO:0005623,GO:0005737,GO:0005886,GO:0006810,GO:0006887,GO:0006949,GO:0006950,GO:0006952,GO:0007275,GO:0008150,GO:0008285,GO:0008544,GO:0009605,GO:0009607,GO:0009617,GO:0009620,GO:0009653,GO:0009888,GO:0009892,GO:0009966,GO:…	-	ko:K03910,ko:K06530	A2M,A2M_N,A2M_N_2,A2M_comp,A2M_recep,DUF1891,TLV_coat,Thiol-ester_cl,VIR_N
g11249.t1	O	metalloendopeptidase activity	MEP1B	GO:0003674,GO:0003824,GO:0004175,GO:0004222,GO:0005488,GO:0005515,GO:0005575,GO:0005623,GO:0005886,GO:0005887,GO:0006508,GO:0006807,GO:0006810,GO:0007275,GO:0007610,GO:0007631,GO:0008150,GO:0008152,GO:0008233,GO:0008237,GO:0016020,GO:0016021,GO:0016787,GO:0017090,GO:0019538,GO:0031224,GO:0031226,GO:0032501,GO:0032502,GO:0032991,GO:0035295,GO:0042755,GO:0042802,GO:0043050,GO:0043170,GO:0044238,GO:…	3.4.24.21,3.4.24.63	ko:K08076,ko:K08606,ko:K13047	Astacin,CUB,EGF,Histone,MAM,ShK,Trypsin
g12194.t1	S	paraoxonase	PON2	GO:0000323,GO:0003674,GO:0003824,GO:0004064,GO:0005488,GO:0005515,GO:0005575,GO:0005576,GO:0005622,GO:0005623,GO:0005634,GO:0005737,GO:0005739,GO:0005764,GO:0005773,GO:0005886,GO:0006082,GO:0006629,GO:0006631,GO:0006690,GO:0006725,GO:0006950,GO:0006979,GO:0008150,GO:0008152,GO:0009056,GO:0009636,GO:0009987,GO:0016020,GO:0016787,GO:0016788,GO:0019372,GO:0019439,GO:0019752,GO:0032787,GO:0042221,GO:…	3.1.1.2,3.1.8.1	ko:K01045	Arylesterase,RVT_1
g12195.t1	A	pre-mRNA branch point binding	SF1	GO:0000003,GO:0000243,GO:0000245,GO:0000375,GO:0000377,GO:0000380,GO:0000389,GO:0000398,GO:0001101,GO:0003006,GO:0003674,GO:0003676,GO:0003712,GO:0003714,GO:0003723,GO:0005488,GO:0005515,GO:0005575,GO:0005622,GO:0005623,GO:0005634,GO:0005654,GO:0005681,GO:0005684,GO:0005737,GO:0005829,GO:0005840,GO:0006139,GO:0006376,GO:0006396,GO:0006397,GO:0006725,GO:0006807,GO:0006996,GO:0006997,GO:0007275,GO:…	-	ko:K13095,ko:K13126	2-oxogl_dehyd_N,ABC_membrane,ABC_tran,DAGK_cat,E1_dh,GLTT,GST_N,KH_1,MFS_1,OxoGdeHyase_C,Peptidase_M28,Phosphorylase,RRM_1,SAP,SF1-HH,Transket_pyr,zf-CCHC,zf-CCHC_3,zf-RanBP
g12196.t1	L	genomic stop codons	-	-	-	-	Gag_MA,Gag_p30,Galactosyl_T,RNase_H,RVP,RVP_2,RVT_1,Retrotrans_gag,SCAN,V-set,gag-asp_proteas,rve,zf-CCHC,zf-H2C2
g12198.t1	C	oxidoreductase activity, oxidizing metal ions with flavin as acceptor	-	-	-	-	DYW_deaminase,PPR,PPR_2,Retrotrans_gag
g12200.t1	S	MAP kinase kinase kinase activity	-	-	-	-	Pkinase
g12201.t1	T	Serine/Threonine protein kinases, catalytic domain	-	-	-	-	FYVE,MORN,Pkinase
g12294.t1	S	Transposase IS4	-	-	-	-	DDE_Tnp_1_7,Dimer_Tnp_hAT
g12295.t1	S	Chitin binding Peritrophin-A domain	-	-	-	-	CBM_14
g12296.t1	T	Neurotransmitter-gated ion-channel transmembrane region	nAChRb1	GO:0001505,GO:0001956,GO:0003008,GO:0003674,GO:0004888,GO:0005215,GO:0005216,GO:0005230,GO:0005231,GO:0005261,GO:0005575,GO:0005623,GO:0005886,GO:0005887,GO:0005892,GO:0006810,GO:0006811,GO:0006812,GO:0006816,GO:0006873,GO:0006874,GO:0006875,GO:0006937,GO:0007154,GO:0007165,GO:0007166,GO:0007204,GO:0007267,GO:0007268,GO:0007271,GO:0007274,GO:0008150,GO:0008324,GO:0009987,GO:0010468,GO:0010646,GO:…	-	ko:K05312	Neur_chan_LBD,Neur_chan_memb
g12297.t1	P	Sodium/hydrogen exchanger family	-	GO:0003008,GO:0005575,GO:0005623,GO:0005886,GO:0006810,GO:0006869,GO:0006873,GO:0006885,GO:0006937,GO:0006942,GO:0007588,GO:0008150,GO:0009987,GO:0010876,GO:0010877,GO:0016020,GO:0016323,GO:0019725,GO:0019915,GO:0030003,GO:0030004,GO:0030421,GO:0030641,GO:0032368,GO:0032370,GO:0032501,GO:0032879,GO:0033036,GO:0042592,GO:0044057,GO:0044058,GO:0044425,GO:0044459,GO:0044464,GO:0045933,GO:0045989,GO:…	-	ko:K05742,ko:K12040,ko:K14722	ADH_N,ADH_zinc_N,Na_H_Exchanger
g12595.t1	O	DnaJ molecular chaperone homology domain	DNAJB8	GO:0003674,GO:0005488,GO:0005515,GO:0005575,GO:0005622,GO:0005623,GO:0005634,GO:0005737,GO:0005829,GO:0006457,GO:0008150,GO:0009987,GO:0043226,GO:0043227,GO:0043229,GO:0043231,GO:0044087,GO:0044183,GO:0044424,GO:0044444,GO:0044464,GO:0048519,GO:0048523,GO:0050789,GO:0050794,GO:0051082,GO:0051087,GO:0051128,GO:0051129,GO:0061077,GO:0065007,GO:0090083,GO:0090084	-	ko:K09508,ko:K09512,ko:K09514	DnaJ,UIM
g12596.t1	TU	Synaptotagmin-like 5	SYTL5	GO:0000149,GO:0001505,GO:0001703,GO:0001736,GO:0001738,GO:0002009,GO:0002164,GO:0002165,GO:0002168,GO:0003674,GO:0005488,GO:0005509,GO:0005515,GO:0005543,GO:0005544,GO:0005575,GO:0005622,GO:0005623,GO:0005737,GO:0005886,GO:0006810,GO:0006836,GO:0006887,GO:0006906,GO:0006996,GO:0007010,GO:0007015,GO:0007043,GO:0007154,GO:0007164,GO:0007267,GO:0007268,GO:0007269,GO:0007275,GO:0007369,GO:0007424,GO:…	-	ko:K17598	C2,FYVE_2,L27_1,RVT_1
g12598.t1	U	emp24/gp25L/p24 family/GOLD	TMED2	GO:0000003,GO:0000139,GO:0000578,GO:0001568,GO:0001701,GO:0001756,GO:0001838,GO:0001841,GO:0001843,GO:0001890,GO:0001892,GO:0001893,GO:0001944,GO:0001947,GO:0002009,GO:0002790,GO:0003002,GO:0003006,GO:0003007,GO:0003143,GO:0003674,GO:0005215,GO:0005575,GO:0005622,GO:0005623,GO:0005737,GO:0005783,GO:0005789,GO:0005793,GO:0005794,GO:0005798,GO:0006621,GO:0006810,GO:0006886,GO:0006888,GO:0006890,GO:…	-	ko:K20347	DEAD,DUF4217,EMP24_GP25L,Helicase_C,LIM_bind
g12721.t1	-	-	-	-	-	-	Helitron_like_N
g12724.t1	O	APPLE domain	F11	GO:0001889,GO:0002254,GO:0002353,GO:0002526,GO:0002542,GO:0002673,GO:0002675,GO:0003674,GO:0003824,GO:0004175,GO:0004177,GO:0004252,GO:0005488,GO:0005515,GO:0005575,GO:0005576,GO:0005615,GO:0005623,GO:0005886,GO:0006082,GO:0006508,GO:0006629,GO:0006631,GO:0006807,GO:0006950,GO:0006952,GO:0006954,GO:0007275,GO:0007596,GO:0007597,GO:0007599,GO:0008150,GO:0008152,GO:0008233,GO:0008236,GO:0008238,GO:…	3.4.21.27,3.4.21.34	ko:K01323,ko:K01324	CBM_14,CUB,PAN_1,PAN_4,Sushi,Trypsin,p450
g12725.t1	T	Transmembrane protease, serine 9	TMPRSS9	GO:0003674,GO:0003824,GO:0004175,GO:0004252,GO:0006508,GO:0006807,GO:0008150,GO:0008152,GO:0008233,GO:0008236,GO:0010467,GO:0016485,GO:0016787,GO:0017171,GO:0019538,GO:0031638,GO:0031639,GO:0043170,GO:0044238,GO:0050789,GO:0050794,GO:0050803,GO:0050807,GO:0051128,GO:0051604,GO:0065007,GO:0065008,GO:0070011,GO:0071704,GO:0099174,GO:0140096,GO:1901564,GO:2000331	3.4.21.9	ko:K01316,ko:K09614,ko:K09640,ko:K17495	CAP_GLY,CUB,EGF,Fz,Kazal_2,Ldl_recept_a,Lectin_C,MAM,PAN_1,SCAN,SEA,Sushi,Trypsin,VWA
g12726.t1	E	of tumorigenicity 14	ST14	GO:0000003,GO:0000902,GO:0000904,GO:0001701,GO:0001763,GO:0001838,GO:0001841,GO:0001843,GO:0001890,GO:0001892,GO:0002009,GO:0002064,GO:0003006,GO:0003382,GO:0003674,GO:0003824,GO:0004175,GO:0004252,GO:0005575,GO:0005576,GO:0005615,GO:0005623,GO:0005886,GO:0005887,GO:0006508,GO:0006807,GO:0006928,GO:0007275,GO:0007399,GO:0008150,GO:0008152,GO:0008219,GO:0008233,GO:0008236,GO:0008544,GO:0009653,GO:…	3.4.21.109,3.4.21.34,3.4.21.4	ko:K01312,ko:K01324,ko:K08670	7tm_1,CUB,EGF,LRR_8,Ldl_recept_a,SEA,SRCR_2,Sushi,Trypsin
g12728.t1	T	guanylate cyclase activity	-	GO:0003674,GO:0003824,GO:0004383,GO:0005575,GO:0005622,GO:0005623,GO:0005737,GO:0005829,GO:0005886,GO:0005887,GO:0006139,GO:0006163,GO:0006164,GO:0006182,GO:0006725,GO:0006753,GO:0006793,GO:0006796,GO:0006807,GO:0007154,GO:0007165,GO:0008074,GO:0008150,GO:0008152,GO:0009058,GO:0009117,GO:0009150,GO:0009152,GO:0009165,GO:0009187,GO:0009190,GO:0009259,GO:0009260,GO:0009975,GO:0009987,GO:0016020,GO:…	4.6.1.2	ko:K12323,ko:K12324,ko:K12325	ANF_receptor,Ank_2,Guanylate_cyc,HNOBA,Pkinase,Pkinase_Tyr
g12729.t1	O	It is involved in the biological process described with proteolysis	mep1b	-	3.4.24.63	ko:K08606	Astacin,DUF1891,MAM
g12987.t1	O	Reverse transcriptase (RNA-dependent DNA polymerase)	-	-	-	ko:K10577	Ank_2,DDE_3,DUF1758,DUF1759,DUF4283,Dimer_Tnp_hAT,MULE,PLAT,RVT_1,UDPGT,UQ_con
g12988.t1	G	positive regulation of TOR signaling	-	-	-	-	Exo_endo_phos_2,RNase_H,RVT_1
g12989.t1	D	Speckle-type poz protein	mel-26	GO:0000793,GO:0003674,GO:0005488,GO:0005515,GO:0005575,GO:0005622,GO:0005623,GO:0005694,GO:0005737,GO:0005886,GO:0005938,GO:0006807,GO:0006996,GO:0007010,GO:0008150,GO:0008152,GO:0009056,GO:0009057,GO:0009653,GO:0009987,GO:0010927,GO:0016020,GO:0016043,GO:0019538,GO:0019899,GO:0019900,GO:0019901,GO:0022607,GO:0030016,GO:0030017,GO:0030029,GO:0030036,GO:0030154,GO:0030163,GO:0030239,GO:0030674,GO:…	-	ko:K03876,ko:K10523,ko:K11373	BTB,Dcc1,IKI3,MATH,RRM_1
g12991.t1	T	Receptor family ligand binding region	gcy-13	-	4.6.1.2	ko:K12323	ANF_receptor,Guanylate_cyc,HNOBA,PBP_like_2,Pkinase,Pkinase_Tyr
g12992.t1	O	It is involved in the biological process described with proteolysis	mep1b	-	3.4.24.63	ko:K08606	Arf,Astacin,DUF1891,MAM
g12993.t1	T	Opsin 4.1	OPN4	GO:0000122,GO:0000323,GO:0000902,GO:0000904,GO:0001654,GO:0001745,GO:0001750,GO:0001751,GO:0001754,GO:0003008,GO:0003674,GO:0004888,GO:0004930,GO:0005488,GO:0005501,GO:0005502,GO:0005515,GO:0005575,GO:0005622,GO:0005623,GO:0005737,GO:0005764,GO:0005767,GO:0005768,GO:0005769,GO:0005770,GO:0005771,GO:0005773,GO:0005783,GO:0005790,GO:0005791,GO:0005886,GO:0005887,GO:0005929,GO:0006355,GO:0006357,GO:…	2.1.2.9	ko:K00604,ko:K04255,ko:K13802	7tm_1,COMM_domain,Formyl_trans_C,Formyl_trans_N,MoCF_biosynth,Nup88,RVT_2
g13030.t1	L	K02A2.6-like	-	-	-	-	7tm_1,RVP,RVT_1,Retrotrans_gag,SCAN,rve,zf-CCHC,zf-H2C2
g13031.t1	L	K02A2.6-like	-	-	-	-	Asp_protease,Asp_protease_2,BIR,PHD,RVP,RVT_1,RVT_2,Retrotrans_gag,SCAN,gag-asp_proteas,gag_pre-integrs,rve,zf-CCHC,zf-H2C2
g13032.t1	O	A-macroglobulin receptor	CD109	GO:0000768,GO:0001932,GO:0001933,GO:0001942,GO:0002376,GO:0002520,GO:0002521,GO:0002573,GO:0002576,GO:0003674,GO:0005488,GO:0005515,GO:0005575,GO:0005576,GO:0005615,GO:0005622,GO:0005623,GO:0005737,GO:0005886,GO:0006810,GO:0006887,GO:0006949,GO:0006950,GO:0006952,GO:0007275,GO:0008150,GO:0008285,GO:0008544,GO:0009605,GO:0009607,GO:0009617,GO:0009620,GO:0009653,GO:0009888,GO:0009892,GO:0009966,GO:…	-	ko:K03910,ko:K06530	A2M,A2M_N,A2M_N_2,A2M_comp,A2M_recep,DUF1891,TLV_coat,Thiol-ester_cl,VIR_N
g13033.t1	O	endopeptidase inhibitor activity	CD109	GO:0000768,GO:0001932,GO:0001933,GO:0001942,GO:0002376,GO:0002520,GO:0002521,GO:0002573,GO:0002576,GO:0003674,GO:0005488,GO:0005515,GO:0005575,GO:0005576,GO:0005615,GO:0005622,GO:0005623,GO:0005737,GO:0005886,GO:0006810,GO:0006887,GO:0006949,GO:0006950,GO:0006952,GO:0007275,GO:0008150,GO:0008285,GO:0008544,GO:0009605,GO:0009607,GO:0009617,GO:0009620,GO:0009653,GO:0009888,GO:0009892,GO:0009966,GO:…	-	ko:K06530	A2M,A2M_N,A2M_N_2,A2M_comp,A2M_recep,DUF1891,TLV_coat,Thiol-ester_cl
g13035.t1	EPT	extracellularly glutamate-gated ion channel activity	-	GO:0003674,GO:0005215,GO:0005216,GO:0005575,GO:0006810,GO:0006811,GO:0008150,GO:0009593,GO:0015075,GO:0015267,GO:0015276,GO:0015318,GO:0016020,GO:0016021,GO:0022803,GO:0022834,GO:0022836,GO:0022838,GO:0022839,GO:0022857,GO:0031224,GO:0034220,GO:0042221,GO:0044425,GO:0050896,GO:0051179,GO:0051234,GO:0051606,GO:0055085	-	-	ANF_receptor,Lig_chan,Lig_chan-Glu_bd,SBP_bac_3,Tetraspannin
g13036.t1	O	glutamic-type peptidase activity	ASTL	GO:0000003,GO:0001775,GO:0003674,GO:0003824,GO:0004175,GO:0004222,GO:0005575,GO:0005622,GO:0005623,GO:0005737,GO:0005886,GO:0006508,GO:0006807,GO:0007155,GO:0007338,GO:0007343,GO:0008150,GO:0008152,GO:0008233,GO:0008237,GO:0009566,GO:0009893,GO:0009987,GO:0010468,GO:0010604,GO:0010628,GO:0010954,GO:0012505,GO:0016020,GO:0016787,GO:0019222,GO:0019538,GO:0019953,GO:0022414,GO:0022610,GO:0030133,GO:…	3.4.24.66,3.4.24.67	ko:K08778,ko:K18542,ko:K18543	Astacin,CUB,DERM,Laminin_G_3,Lectin_C,MAM,Methyltransf_FA,ShK,TSP_1,VWD
g13479.t1	-	-	-	-	-	-	AIG1,Dynamin_N,MMR_HSR1,Septin
g13480.t1	U	member RAS oncogene family	RAB11A	GO:0000003,GO:0000041,GO:0000070,GO:0000149,GO:0000166,GO:0000226,GO:0000278,GO:0000280,GO:0000819,GO:0000902,GO:0000910,GO:0000916,GO:0000922,GO:0001558,GO:0001654,GO:0001667,GO:0001678,GO:0001700,GO:0001709,GO:0001745,GO:0001751,GO:0001754,GO:0001775,GO:0001881,GO:0001882,GO:0001883,GO:0002009,GO:0002064,GO:0002065,GO:0002066,GO:0002376,GO:0002790,GO:0003002,GO:0003006,GO:0003008,GO:0003014,GO:…	-	ko:K07904,ko:K07905	Ras,Roc
g13481.t1	L	stress-activated protein kinase signaling cascade	-	-	2.7.11.1	ko:K08836,ko:K08837	Pkinase
g13482.t1	L	Conserved hypothetical protein	-	-	-	-	DUF659,Dimer_Tnp_hAT,zf-BED
g13486.t1	O	It is involved in the biological process described with proteolysis	-	GO:0003008,GO:0003674,GO:0003824,GO:0004175,GO:0004222,GO:0005575,GO:0005576,GO:0005615,GO:0006508,GO:0006807,GO:0006928,GO:0007154,GO:0007267,GO:0007600,GO:0008150,GO:0008152,GO:0008233,GO:0008237,GO:0009987,GO:0010467,GO:0016477,GO:0016485,GO:0016787,GO:0019233,GO:0019538,GO:0023052,GO:0030154,GO:0032501,GO:0032502,GO:0040011,GO:0043170,GO:0044238,GO:0044421,GO:0045165,GO:0045168,GO:0046331,GO:…	3.4.24.18,3.4.24.63	ko:K01395,ko:K08606	Antistasin,Astacin,CUB,F5_F8_type_C,LRR_8,Lectin_C,MAM,Pentaxin,ShK,VWD
g13635.t1	Z	Dynein light chain	-	GO:0000003,GO:0000775,GO:0000776,GO:0001505,GO:0002791,GO:0002793,GO:0003006,GO:0003674,GO:0004857,GO:0005085,GO:0005088,GO:0005089,GO:0005488,GO:0005515,GO:0005575,GO:0005622,GO:0005623,GO:0005634,GO:0005694,GO:0005737,GO:0005819,GO:0005856,GO:0005868,GO:0005875,GO:0006807,GO:0006809,GO:0006810,GO:0006928,GO:0006996,GO:0007017,GO:0007018,GO:0007275,GO:0007276,GO:0007281,GO:0007283,GO:0007286,GO:…	-	ko:K10418	Dynein_light,Metallophos,PRONE,Ribosomal_S14
g13636.t1	Z	Dynein light chain	-	GO:0000003,GO:0000775,GO:0000776,GO:0001505,GO:0002791,GO:0002793,GO:0003006,GO:0003674,GO:0004857,GO:0005085,GO:0005088,GO:0005089,GO:0005488,GO:0005515,GO:0005575,GO:0005622,GO:0005623,GO:0005634,GO:0005694,GO:0005737,GO:0005819,GO:0005856,GO:0005868,GO:0005875,GO:0006807,GO:0006809,GO:0006810,GO:0006928,GO:0006996,GO:0007017,GO:0007018,GO:0007275,GO:0007276,GO:0007281,GO:0007283,GO:0007286,GO:…	-	ko:K10418	Dynein_light,Metallophos,PRONE,Ribosomal_S14
g13638.t1	W	Sushi domain-containing protein	-	-	-	-	AMOP,Cadherin,EGF,EGF_CA,HYR,IgGFc_binding,Lectin_C,NIDO,PAN_1,Sushi,TIG,TMEM154,VWD
g13640.t1	-	-	-	-	-	-	AIG1,Dynamin_N,MMR_HSR1,Septin
g13641.t1	L	zinc finger	-	-	-	-	RVT_1,Retrotrans_gag,gag-asp_proteas,zf-CCHC
g13875.t1	T	MAM and LDL-receptor class A domain-containing protein	MAMDC4	-	2.7.10.1	ko:K05088,ko:K05099,ko:K05119	Gly_rich,Ldl_recept_a,MAM,Ocnus,Pkinase_Tyr,TIG,fn3
g13876.t1	T	negative regulation of bile acid biosynthetic process	-	-	-	ko:K04307,ko:K19721,ko:K22453	7tm_1,CUB,Collagen,DUF229,DUF316,EB,EGF,EGF_CA,F5_F8_type_C,FXa_inhibition,I-set,IgGFc_binding,Ig_3,Kringle,LRR_5,LRR_8,Ldl_recept_a,Lectin_C,MAM,Mucin2_WxxW,NIDO,Pkinase_Tyr,SEA,SRCR,Trefoil,WIF,Xlink,cEGF
g13877.t1	TV	Mannose receptor	MRC1	GO:0000003,GO:0002237,GO:0002376,GO:0003674,GO:0004888,GO:0005488,GO:0005534,GO:0005537,GO:0005575,GO:0005576,GO:0005615,GO:0005622,GO:0005623,GO:0005737,GO:0005768,GO:0005886,GO:0005887,GO:0006810,GO:0006897,GO:0006898,GO:0006950,GO:0006952,GO:0006955,GO:0007154,GO:0007165,GO:0007320,GO:0007610,GO:0007617,GO:0007618,GO:0007620,GO:0008104,GO:0008150,GO:0009605,GO:0009607,GO:0009617,GO:0009986,GO:…	-	ko:K06560	Lectin_C,Ricin_B_lectin,fn2
g13878.t1	G	phosphatase activity. It is involved in the biological process described with metabolic process	ALPL	GO:0000003,GO:0000287,GO:0000322,GO:0000323,GO:0000324,GO:0000329,GO:0001501,GO:0001503,GO:0001666,GO:0001958,GO:0002020,GO:0002237,GO:0003006,GO:0003674,GO:0003824,GO:0004035,GO:0005488,GO:0005515,GO:0005575,GO:0005576,GO:0005615,GO:0005622,GO:0005623,GO:0005737,GO:0005773,GO:0005774,GO:0005886,GO:0005903,GO:0006139,GO:0006464,GO:0006470,GO:0006629,GO:0006644,GO:0006650,GO:0006654,GO:0006725,GO:…	3.1.3.1	ko:K01077,ko:K21411	Abhydrolase_6,Alk_phosphatase,Beta-Casp,CPSF73-100_C,CutC,DSPc,LEM,Lactamase_B_6,MFS_1,Peptidase_M13_N,RMMBL,RVT_1,SesA
g13879.t1	O	Astacin-like metallo-endopeptidase (M12 family)	-	-	-	ko:K08778	Astacin,TSP_1,VCBS
g13945.t1	O	ubiquitin-protein transferase activity	HUWE1	GO:0000209,GO:0000278,GO:0000447,GO:0000448,GO:0000460,GO:0000462,GO:0000463,GO:0000466,GO:0000469,GO:0000470,GO:0000472,GO:0000478,GO:0000479,GO:0000480,GO:0000966,GO:0000967,GO:0001709,GO:0001775,GO:0002252,GO:0002263,GO:0002274,GO:0002275,GO:0002283,GO:0002366,GO:0002376,GO:0002443,GO:0002444,GO:0002446,GO:0003674,GO:0003676,GO:0003677,GO:0003824,GO:0004842,GO:0005488,GO:0005515,GO:0005575,GO:…	2.3.2.26	ko:K10592	DUF4414,DUF908,DUF913,HECT,Kri1,Pribosyl_synth,Pribosyltran_N,UBA,UDPGT,WWE
g13948.t1	-	-	-	-	-	-	7TM_GPCR_Srw,DNA_pol_B_2,Rho_N
g13949.t1	-	-	-	-	-	-	7TM_GPCR_Srw,DNA_pol_B_2
g13952.t1	M	Acetyltransferase (GNAT) domain	GNPNAT1	GO:0000003,GO:0003006,GO:0003674,GO:0003824,GO:0004343,GO:0005488,GO:0005515,GO:0005575,GO:0005622,GO:0005623,GO:0005634,GO:0005737,GO:0005768,GO:0005770,GO:0005783,GO:0005793,GO:0005794,GO:0005829,GO:0006022,GO:0006023,GO:0006030,GO:0006031,GO:0006040,GO:0006041,GO:0006044,GO:0006045,GO:0006047,GO:0006048,GO:0006139,GO:0006725,GO:0006793,GO:0006807,GO:0007275,GO:0007276,GO:0007281,GO:0007292,GO:…	2.1.1.211,2.3.1.4,4.2.1.2	ko:K00621,ko:K01679,ko:K15447	Acetyltransf_1,Acetyltransf_10,Acetyltransf_7,AdoMet_MTase,DUF962,FYRC,FYRN,FumaraseC_C,Gelsolin,Lyase_1,PTPLA,RAI1,RhoGAP,Sec23_BS,Sec23_helical,Sec23_trunk,Syntaxin-6_N,TauD,zf-Sec23_Sec24
g13953.t1	S	Complex I intermediate-associated protein 30 (CIA30)	NDUFAF1	GO:0001666,GO:0003674,GO:0005488,GO:0005515,GO:0005575,GO:0005622,GO:0005623,GO:0005737,GO:0005739,GO:0005740,GO:0005743,GO:0005746,GO:0005747,GO:0005829,GO:0006091,GO:0006119,GO:0006120,GO:0006139,GO:0006163,GO:0006725,GO:0006753,GO:0006793,GO:0006796,GO:0006807,GO:0006950,GO:0006996,GO:0007005,GO:0008150,GO:0008152,GO:0009117,GO:0009123,GO:0009126,GO:0009141,GO:0009144,GO:0009150,GO:0009161,GO:…	-	ko:K18159	CIA30,DAO
g13955.t1	-	-	-	-	-	-	DUF1258,HTH_23,HTH_29,Peptidase_C48,Transposase_21
g14048.t1	Q	glutathione synthase activity. It is involved in the biological process described with glutathione biosynthetic process	GSS	GO:0000166,GO:0000287,GO:0001101,GO:0003674,GO:0003824,GO:0004363,GO:0005488,GO:0005515,GO:0005524,GO:0005575,GO:0005622,GO:0005623,GO:0005737,GO:0005829,GO:0006082,GO:0006518,GO:0006520,GO:0006575,GO:0006749,GO:0006750,GO:0006790,GO:0006807,GO:0006810,GO:0006811,GO:0006820,GO:0006857,GO:0006950,GO:0006974,GO:0006979,GO:0007275,GO:0007399,GO:0007568,GO:0008144,GO:0008150,GO:0008152,GO:0009058,GO:…	3.1.26.5,4.2.2.23,6.3.2.17,6.3.2.3	ko:K01930,ko:K03539,ko:K18195,ko:K21456	CARD,CBM-like,DUF155,DUF3759,DUF4413,GSH_synth_ATP,GSH_synthase,IMD,Mur_ligase_M,Peptidase_C14,RNase_P_p30,Rep_fac_C,fn3_3,polyprenyl_synt
g14049.t1	S	heme binding	CYB5D2	GO:0003674,GO:0005488,GO:0005575,GO:0005576,GO:0005623,GO:0007275,GO:0007399,GO:0008150,GO:0009987,GO:0010720,GO:0012505,GO:0016020,GO:0020037,GO:0022008,GO:0030154,GO:0032501,GO:0032502,GO:0044464,GO:0045595,GO:0045597,GO:0045664,GO:0045666,GO:0046906,GO:0048037,GO:0048518,GO:0048522,GO:0048699,GO:0048731,GO:0048856,GO:0048869,GO:0050767,GO:0050769,GO:0050789,GO:0050793,GO:0050794,GO:0051094,GO:…	1.5.1.3	ko:K00287	Cyt-b5,DUF1838,F-box-like,FSH1,TFIIS_C
g14051.t1	S	paraoxonase	PON2	GO:0000323,GO:0003674,GO:0003824,GO:0004064,GO:0005488,GO:0005515,GO:0005575,GO:0005576,GO:0005622,GO:0005623,GO:0005634,GO:0005737,GO:0005739,GO:0005764,GO:0005773,GO:0005886,GO:0006082,GO:0006629,GO:0006631,GO:0006690,GO:0006725,GO:0006950,GO:0006979,GO:0008150,GO:0008152,GO:0009056,GO:0009636,GO:0009987,GO:0016020,GO:0016787,GO:0016788,GO:0019372,GO:0019439,GO:0019752,GO:0032787,GO:0042221,GO:…	3.1.1.2,3.1.8.1	ko:K01045	Arylesterase,RVT_1
g14052.t1	O	cysteine-type endopeptidase activity	-	-	3.4.22.15	ko:K01365	7tm_1,CathepsinC_exc,Inhibitor_I29,Peptidase_C1,Propeptide_C1
g14053.t1	S	oxygenase	MIOX	GO:0000166,GO:0003674,GO:0003824,GO:0004033,GO:0005488,GO:0005506,GO:0005575,GO:0005622,GO:0005623,GO:0005737,GO:0005829,GO:0005975,GO:0006020,GO:0006066,GO:0006793,GO:0006796,GO:0006884,GO:0007154,GO:0007165,GO:0008150,GO:0008152,GO:0008199,GO:0008361,GO:0009056,GO:0009987,GO:0009992,GO:0016043,GO:0016052,GO:0016234,GO:0016491,GO:0016614,GO:0016616,GO:0016651,GO:0016701,GO:0019310,GO:0019637,GO:…	1.13.99.1	ko:K00469	AAA,Ank,Ank_2,DRY_EERY,Kinesin,MIOX,NopRA1,RVT_2,Surp
g14260.t1	E	Oxidoreductase activity, acting on paired donors, with incorporation or reduction of molecular oxygen, reduced ascorbate as one donor, and incorporation of one atom of oxygen	MOXD1	GO:0001505,GO:0003674,GO:0003824,GO:0004497,GO:0004500,GO:0005488,GO:0005507,GO:0005575,GO:0005576,GO:0005615,GO:0005622,GO:0005623,GO:0005737,GO:0005783,GO:0005789,GO:0006066,GO:0006576,GO:0006584,GO:0006589,GO:0006725,GO:0006807,GO:0008150,GO:0008152,GO:0009056,GO:0009058,GO:0009308,GO:0009309,GO:0009712,GO:0009713,GO:0009987,GO:0012505,GO:0012506,GO:0016020,GO:0016491,GO:0016705,GO:0016715,GO:…	1.14.17.1	ko:K00503	Clat_adaptor_s,Cu2_monoox_C,Cu2_monooxygen,DOMON
g14261.t1	E	Oxidoreductase activity, acting on paired donors, with incorporation or reduction of molecular oxygen, reduced ascorbate as one donor, and incorporation of one atom of oxygen	MOXD1	GO:0001505,GO:0003674,GO:0003824,GO:0004497,GO:0004500,GO:0005488,GO:0005507,GO:0005575,GO:0005576,GO:0005615,GO:0005622,GO:0005623,GO:0005737,GO:0005783,GO:0005789,GO:0006066,GO:0006576,GO:0006584,GO:0006589,GO:0006725,GO:0006807,GO:0008150,GO:0008152,GO:0009056,GO:0009058,GO:0009308,GO:0009309,GO:0009712,GO:0009713,GO:0009987,GO:0012505,GO:0012506,GO:0016020,GO:0016491,GO:0016705,GO:0016715,GO:…	1.14.17.1	ko:K00503	Clat_adaptor_s,Cu2_monoox_C,Cu2_monooxygen,DOMON
g14262.t1	M	DegT/DnrJ/EryC1/StrS aminotransferase family	-	-	-	-	DegT_DnrJ_EryC1
g14263.t1	S	secretory protein 3	CRISP3	GO:0006935,GO:0008150,GO:0009605,GO:0040011,GO:0042221,GO:0042330,GO:0050896	-	ko:K19919	CAP,CXCXC,Crisp,EGF,Lectin_C
g14264.t1	TZ	cysteine and glycine-rich protein	CSRP1	GO:0001085,GO:0001725,GO:0001974,GO:0002026,GO:0003008,GO:0003012,GO:0003013,GO:0003015,GO:0003300,GO:0003674,GO:0005198,GO:0005488,GO:0005515,GO:0005575,GO:0005622,GO:0005623,GO:0005634,GO:0005654,GO:0005737,GO:0005856,GO:0005912,GO:0005924,GO:0005925,GO:0006355,GO:0006357,GO:0006873,GO:0006874,GO:0006875,GO:0006936,GO:0006941,GO:0006996,GO:0007010,GO:0007275,GO:0007399,GO:0007507,GO:0007517,GO:…	-	ko:K09377	LIM
g14266.t1	T	Casein kinase 1 gamma C terminal	CSNK1G2	GO:0000003,GO:0000166,GO:0000287,GO:0000322,GO:0000323,GO:0000324,GO:0000329,GO:0000902,GO:0001654,GO:0001678,GO:0001736,GO:0001738,GO:0001745,GO:0002009,GO:0003006,GO:0003008,GO:0003674,GO:0003824,GO:0004672,GO:0004674,GO:0004713,GO:0005488,GO:0005515,GO:0005524,GO:0005575,GO:0005622,GO:0005623,GO:0005634,GO:0005737,GO:0005739,GO:0005773,GO:0005774,GO:0005783,GO:0005818,GO:0005819,GO:0005829,GO:…	2.7.11.1	ko:K02218,ko:K08958,ko:K19830	CK1gamma_C,Pkinase,Pkinase_Tyr
g14267.t1	E	K02A2.6-like	-	-	-	-	Asp_protease_2,DDE_Tnp_4,DUF1759,HTH_Tnp_4,PHD,PNMA,RVP_2,RVT_1,SCAN,SRCR,Suppressor_APC,TatD_DNase,Zona_pellucida,gag-asp_proteas,rve,zf-CCHC,zf-H2C2
g14639.t1	S	N-terminal domain in C. elegans NRF-6 (Nose Resistant to Fluoxetine-4) and NDG-4 (resistant to nordihydroguaiaretic acid-4).	OACYL	GO:0007275,GO:0007423,GO:0007444,GO:0008150,GO:0009888,GO:0022416,GO:0032501,GO:0032502,GO:0035220,GO:0035295,GO:0048513,GO:0048731,GO:0048856,GO:0060429	-	-	Acyl_transf_3,Ank_4,BACK,BTB,DUF1091,Death,Exo_endo_phos,LRR_8,PapD-like
g14641.t1	T	guanylate cyclase activity	-	GO:0003674,GO:0003824,GO:0004383,GO:0005575,GO:0005622,GO:0005623,GO:0005737,GO:0005829,GO:0005886,GO:0005887,GO:0006139,GO:0006163,GO:0006164,GO:0006182,GO:0006725,GO:0006753,GO:0006793,GO:0006796,GO:0006807,GO:0007154,GO:0007165,GO:0008074,GO:0008150,GO:0008152,GO:0009058,GO:0009117,GO:0009150,GO:0009152,GO:0009165,GO:0009187,GO:0009190,GO:0009259,GO:0009260,GO:0009975,GO:0009987,GO:0016020,GO:…	4.6.1.2	ko:K12323,ko:K12324,ko:K12325	ANF_receptor,Ank_2,Guanylate_cyc,HNOBA,Pkinase,Pkinase_Tyr
g14642.t1	S	Tetraspanin family	Tspan18	GO:0005575,GO:0005623,GO:0005886,GO:0005887,GO:0007154,GO:0007165,GO:0007166,GO:0008150,GO:0009987,GO:0016020,GO:0016021,GO:0023052,GO:0031224,GO:0031226,GO:0044425,GO:0044459,GO:0044464,GO:0050789,GO:0050794,GO:0050896,GO:0051716,GO:0065007,GO:0071944	-	ko:K17352,ko:K17353	Tetraspannin
g14651.t1	L	Integrase core domain	-	-	-	-	Baculo_F,Chromo,Pkinase,rve
g14652.t1	H	Integrase core domain	-	-	-	-	Baculo_F,Chromo,DUF4371,Pkinase,RVT_1,rve
g14653.t1	S	carbohydrate binding	CLEC9A	GO:0001817,GO:0001819,GO:0002791,GO:0002793,GO:0005575,GO:0005623,GO:0006810,GO:0006897,GO:0006898,GO:0008150,GO:0009986,GO:0016192,GO:0032879,GO:0032880,GO:0044464,GO:0048518,GO:0048522,GO:0050707,GO:0050708,GO:0050714,GO:0050715,GO:0050789,GO:0050794,GO:0051046,GO:0051047,GO:0051049,GO:0051050,GO:0051179,GO:0051222,GO:0051223,GO:0051234,GO:0051239,GO:0051240,GO:0065007,GO:0070201,GO:0090087,GO:…	-	ko:K17515,ko:K17516	Lectin_C,Ly49
g14654.t1	S	oxidation-reduction process	-	-	-	-	Exo_endo_phos_2,Herpes_teg_N
g14657.t1	S	50S ribosome-binding GTPase	-	-	-	-	AIG1,MMR_HSR1
g14659.t1	O	zinc metalloproteinase	MEP1B	GO:0003674,GO:0003824,GO:0004175,GO:0004222,GO:0005488,GO:0005515,GO:0005575,GO:0005623,GO:0005886,GO:0005887,GO:0006508,GO:0006807,GO:0006810,GO:0007275,GO:0007610,GO:0007631,GO:0008150,GO:0008152,GO:0008233,GO:0008237,GO:0016020,GO:0016021,GO:0016787,GO:0017090,GO:0019538,GO:0031224,GO:0031226,GO:0032501,GO:0032502,GO:0032991,GO:0035295,GO:0042755,GO:0042802,GO:0043050,GO:0043170,GO:0044238,GO:…	3.4.24.21,3.4.24.63	ko:K08076,ko:K08606	Astacin,EGF,Histone,MAM,ShK,TSP_1,Trypsin
g14660.t1	T	Calcium ion binding	dp	GO:0002009,GO:0002165,GO:0003674,GO:0005198,GO:0005201,GO:0005575,GO:0005576,GO:0007275,GO:0007424,GO:0007444,GO:0007472,GO:0007475,GO:0007476,GO:0007552,GO:0007560,GO:0007591,GO:0008150,GO:0008362,GO:0008587,GO:0009653,GO:0009791,GO:0009886,GO:0009887,GO:0009888,GO:0022404,GO:0031012,GO:0032501,GO:0032502,GO:0035107,GO:0035114,GO:0035120,GO:0035220,GO:0035239,GO:0035295,GO:0040003,GO:0040005,GO:…	-	ko:K02599,ko:K04550,ko:K19601	EGF,EGF_2,EGF_3,EGF_CA,FXa_inhibition,Glyco_hydro_114,JHBP,Kunitz_BPTI,LRR_8,Laminin_G_2,Ldl_recept_a,Ldl_recept_b,Mucin2_WxxW,NIDO,REJ,Somatomedin_B,TSP_1,VCBS,Zona_pellucida,cEGF,hEGF
g14661.t1	O	glutamic-type peptidase activity	ASTL	GO:0000003,GO:0001775,GO:0003674,GO:0003824,GO:0004175,GO:0004222,GO:0005575,GO:0005622,GO:0005623,GO:0005737,GO:0005886,GO:0006508,GO:0006807,GO:0007155,GO:0007338,GO:0007343,GO:0008150,GO:0008152,GO:0008233,GO:0008237,GO:0009566,GO:0009893,GO:0009987,GO:0010468,GO:0010604,GO:0010628,GO:0010954,GO:0012505,GO:0016020,GO:0016787,GO:0019222,GO:0019538,GO:0019953,GO:0022414,GO:0022610,GO:0030133,GO:…	3.4.24.66,3.4.24.67	ko:K08778,ko:K18542,ko:K18543	Astacin,CUB,DERM,Laminin_G_3,Lectin_C,MAM,Methyltransf_FA,ShK,TSP_1,VWD
g14725.t1	T	EF-hand domain	CALML3	GO:0003674,GO:0005488,GO:0005509,GO:0043167,GO:0043169,GO:0046872	-	ko:K02183	EF-hand_1,EF-hand_5,EF-hand_6,EF-hand_7,EF-hand_8
g14726.t1	BD	Putative DNA-binding domain in centromere protein B, mouse jerky and transposases.	PDC2	GO:0000003,GO:0000070,GO:0000228,GO:0000278,GO:0000280,GO:0000775,GO:0000779,GO:0000780,GO:0000785,GO:0000790,GO:0000792,GO:0000793,GO:0000794,GO:0000819,GO:0000976,GO:0000977,GO:0000978,GO:0000987,GO:0001012,GO:0001067,GO:0003006,GO:0003674,GO:0003676,GO:0003677,GO:0003690,GO:0005488,GO:0005575,GO:0005622,GO:0005623,GO:0005634,GO:0005694,GO:0006109,GO:0006140,GO:0006325,GO:0006342,GO:0006355,GO:…	-	-	CENP-B_N,COesterase,DDE_1,DDE_Tnp_4,DUF4371,Dimer_Tnp_hAT,HTH_Tnp_Tc5,MADF_DNA_bdg
g14727.t1	BD	Putative DNA-binding domain in centromere protein B, mouse jerky and transposases.	PDC2	GO:0000003,GO:0000070,GO:0000228,GO:0000278,GO:0000280,GO:0000775,GO:0000779,GO:0000780,GO:0000785,GO:0000790,GO:0000792,GO:0000793,GO:0000794,GO:0000819,GO:0000976,GO:0000977,GO:0000978,GO:0000987,GO:0001012,GO:0001067,GO:0003006,GO:0003674,GO:0003676,GO:0003677,GO:0003690,GO:0005488,GO:0005575,GO:0005622,GO:0005623,GO:0005634,GO:0005694,GO:0006109,GO:0006140,GO:0006325,GO:0006342,GO:0006355,GO:…	-	-	CENP-B_N,COesterase,DDE_1,DDE_Tnp_4,DUF4371,Dimer_Tnp_hAT,HTH_Tnp_Tc5,MADF_DNA_bdg
g14729.t1	-	-	-	-	-	-	-
g14730.t1	S	Fuseless	fusl	GO:0005575,GO:0005623,GO:0005886,GO:0007154,GO:0007267,GO:0007268,GO:0007270,GO:0007274,GO:0007275,GO:0007399,GO:0008150,GO:0009987,GO:0016020,GO:0016043,GO:0021700,GO:0022008,GO:0023052,GO:0030154,GO:0030182,GO:0030424,GO:0032501,GO:0032502,GO:0033267,GO:0042551,GO:0042734,GO:0042995,GO:0043005,GO:0043195,GO:0043679,GO:0044306,GO:0044425,GO:0044456,GO:0044459,GO:0044463,GO:0044464,GO:0045161,GO:…	-	-	Fuseless
g14849.t1	T	Serine threonine-protein kinase	-	GO:0001666,GO:0003674,GO:0003824,GO:0004672,GO:0004674,GO:0004712,GO:0005575,GO:0005622,GO:0005623,GO:0005737,GO:0005783,GO:0005789,GO:0006082,GO:0006464,GO:0006468,GO:0006629,GO:0006720,GO:0006721,GO:0006793,GO:0006796,GO:0006807,GO:0006950,GO:0007154,GO:0007165,GO:0008150,GO:0008152,GO:0008299,GO:0008610,GO:0009058,GO:0009628,GO:0009685,GO:0009686,GO:0009719,GO:0009723,GO:0009725,GO:0009743,GO:…	2.7.11.1,2.7.11.25	ko:K04424,ko:K14510	EDR1,PAS,PAS_3,PAS_4,PAS_9,Pkinase_Tyr,RVT_1
g14851.t1	S	dsRNA-gated channel SID-1	SIDT1	GO:0000323,GO:0000902,GO:0002064,GO:0002065,GO:0002066,GO:0002067,GO:0002068,GO:0002791,GO:0003309,GO:0003323,GO:0003674,GO:0003676,GO:0003723,GO:0003725,GO:0005215,GO:0005488,GO:0005496,GO:0005575,GO:0005622,GO:0005623,GO:0005737,GO:0005764,GO:0005765,GO:0005768,GO:0005773,GO:0005774,GO:0005794,GO:0005886,GO:0006139,GO:0006401,GO:0006403,GO:0006725,GO:0006807,GO:0006810,GO:0006869,GO:0007275,GO:…	-	-	SID-1_RNA_chan
g14852.t1	S	dsRNA-gated channel SID-1	SIDT1	GO:0000323,GO:0000902,GO:0002064,GO:0002065,GO:0002066,GO:0002067,GO:0002068,GO:0002791,GO:0003309,GO:0003323,GO:0003674,GO:0003676,GO:0003723,GO:0003725,GO:0005215,GO:0005488,GO:0005496,GO:0005575,GO:0005622,GO:0005623,GO:0005737,GO:0005764,GO:0005765,GO:0005768,GO:0005773,GO:0005774,GO:0005794,GO:0005886,GO:0006139,GO:0006401,GO:0006403,GO:0006725,GO:0006807,GO:0006810,GO:0006869,GO:0007275,GO:…	-	-	SID-1_RNA_chan
g14855.t1	BD	Putative DNA-binding domain in centromere protein B, mouse jerky and transposases.	-	-	-	-	CENP-B_N,DDE_1,DDE_Tnp_4,DUF4371,Dimer_Tnp_hAT,HTH_Tnp_Tc5,MADF_DNA_bdg
g14857.t1	O	Heat shock protein	HSP70	GO:0001666,GO:0003674,GO:0005488,GO:0005515,GO:0005575,GO:0005622,GO:0005623,GO:0005737,GO:0005739,GO:0006457,GO:0006950,GO:0006986,GO:0006996,GO:0007275,GO:0007568,GO:0008150,GO:0008340,GO:0009266,GO:0009408,GO:0009605,GO:0009628,GO:0009636,GO:0009987,GO:0009991,GO:0010033,GO:0010259,GO:0016043,GO:0031667,GO:0032501,GO:0032502,GO:0033554,GO:0034605,GO:0035079,GO:0035080,GO:0035966,GO:0036293,GO:…	-	ko:K03283	HSP70,MreB_Mbl,Pkinase,SRCR
g14858.t1	O	Belongs to the heat shock protein 70 family	HSP70	-	-	ko:K03283	HSP70,MreB_Mbl,SRCR
g14859.t1	O	Prolylcarboxypeptidase (angiotensinase C)	PRCP	GO:0000323,GO:0001525,GO:0001568,GO:0001775,GO:0001944,GO:0002155,GO:0002252,GO:0002254,GO:0002263,GO:0002274,GO:0002275,GO:0002283,GO:0002353,GO:0002366,GO:0002376,GO:0002443,GO:0002444,GO:0002446,GO:0002526,GO:0003008,GO:0003013,GO:0003073,GO:0003085,GO:0003674,GO:0003824,GO:0004177,GO:0004180,GO:0004185,GO:0005575,GO:0005622,GO:0005623,GO:0005737,GO:0005764,GO:0005765,GO:0005766,GO:0005773,GO:…	3.4.14.2,3.4.16.2	ko:K01276,ko:K01285	FtsJ,Peptidase_S28
g14860.t1	Z	Belongs to the TRAFAC class TrmE-Era-EngA-EngB-Septin- like GTPase superfamily. Septin GTPase family	-	-	-	-	AIG1,Cadherin,I-set,Ig_3,Lipase_GDSL,MAM,MMR_HSR1,PRY,SPRY,Septin,fn3
g14862.t1	O	Prolylcarboxypeptidase (angiotensinase C)	PRCP	GO:0000323,GO:0001525,GO:0001568,GO:0001775,GO:0001944,GO:0002155,GO:0002252,GO:0002254,GO:0002263,GO:0002274,GO:0002275,GO:0002283,GO:0002353,GO:0002366,GO:0002376,GO:0002443,GO:0002444,GO:0002446,GO:0002526,GO:0003008,GO:0003013,GO:0003073,GO:0003085,GO:0003674,GO:0003824,GO:0004177,GO:0004180,GO:0004185,GO:0005575,GO:0005622,GO:0005623,GO:0005737,GO:0005764,GO:0005765,GO:0005766,GO:0005773,GO:…	3.4.14.2,3.4.16.2	ko:K01276,ko:K01285	FtsJ,Peptidase_S28
g14924.t1	O	Belongs to the peptidase C1 family	-	-	3.4.22.1,3.4.22.15,3.4.22.27,3.4.22.38	ko:K01363,ko:K01365,ko:K01368,ko:K01371	Inhibitor_I29,Peptidase_C1,Propeptide_C1
g14925.t1	-	-	-	-	-	-	-
g14926.t1	T	guanylate cyclase activity	-	GO:0003674,GO:0003824,GO:0004383,GO:0005575,GO:0005622,GO:0005623,GO:0005737,GO:0005829,GO:0005886,GO:0005887,GO:0006139,GO:0006163,GO:0006164,GO:0006182,GO:0006725,GO:0006753,GO:0006793,GO:0006796,GO:0006807,GO:0007154,GO:0007165,GO:0008074,GO:0008150,GO:0008152,GO:0009058,GO:0009117,GO:0009150,GO:0009152,GO:0009165,GO:0009187,GO:0009190,GO:0009259,GO:0009260,GO:0009975,GO:0009987,GO:0016020,GO:…	4.6.1.2	ko:K12323,ko:K12324,ko:K12325	ANF_receptor,Ank_2,Guanylate_cyc,HNOBA,Pkinase,Pkinase_Tyr
g15099.t1	O	It is involved in the biological process described with proteolysis	mep1b	-	3.4.24.63	ko:K08606	Astacin,DERM,DUF1891,MAM,ShK
g15100.t1	S	Septin	-	-	-	-	AIG1,CD20,DDE_Tnp_1_7,MMR_HSR1,Septin,fn3
g15101.t1	T	Serine/Threonine protein kinases, catalytic domain	TTK	GO:0000003,GO:0000075,GO:0000226,GO:0000228,GO:0000278,GO:0000280,GO:0000775,GO:0000776,GO:0000777,GO:0000778,GO:0000779,GO:0000780,GO:0000793,GO:0000794,GO:0001932,GO:0001934,GO:0003674,GO:0003824,GO:0004672,GO:0004674,GO:0004712,GO:0004713,GO:0005488,GO:0005515,GO:0005575,GO:0005622,GO:0005623,GO:0005634,GO:0005694,GO:0005737,GO:0005813,GO:0005815,GO:0005819,GO:0005856,GO:0006464,GO:0006468,GO:…	2.7.12.1	ko:K08866	Mad3_BUB1_I,NAM-associated,Pkinase
g15105.t1	P	It is involved in the biological process described with cation transport	ATP13A1	GO:0000003,GO:0000041,GO:0001709,GO:0003674,GO:0003824,GO:0005215,GO:0005384,GO:0005388,GO:0005575,GO:0005622,GO:0005623,GO:0005737,GO:0005739,GO:0005783,GO:0005789,GO:0005794,GO:0005801,GO:0005886,GO:0005887,GO:0006810,GO:0006811,GO:0006812,GO:0006816,GO:0006828,GO:0006873,GO:0006874,GO:0006875,GO:0006950,GO:0007154,GO:0007275,GO:0008150,GO:0008324,GO:0009267,GO:0009555,GO:0009605,GO:0009846,GO:…	3.6.3.8	ko:K01537,ko:K14950	BSD,Cation_ATPase,Cation_ATPase_N,E1-E2_ATPase,Fungal_trans_2,Hydrolase,Hydrolase_3,OPT,PKD_channel,Ras,SIR2,WD40
g15106.t1	S	Lysin motif	-	-	-	-	DUF1080,LysM
g15152.t1	O	zinc metalloproteinase	MEP1B	GO:0003674,GO:0003824,GO:0004175,GO:0004222,GO:0005488,GO:0005515,GO:0005575,GO:0005623,GO:0005886,GO:0005887,GO:0006508,GO:0006807,GO:0006810,GO:0007275,GO:0007610,GO:0007631,GO:0008150,GO:0008152,GO:0008233,GO:0008237,GO:0016020,GO:0016021,GO:0016787,GO:0017090,GO:0019538,GO:0031224,GO:0031226,GO:0032501,GO:0032502,GO:0032991,GO:0035295,GO:0042755,GO:0042802,GO:0043050,GO:0043170,GO:0044238,GO:…	3.4.24.21,3.4.24.63	ko:K08076,ko:K08606	Astacin,EGF,Histone,MAM,ShK,TSP_1,Trypsin
g15153.t1	T	guanylate cyclase activity	-	-	-	-	Guanylate_cyc,HNOBA,NIT
g15154.t1	T	Centrosomal protein	CEP104	GO:0000922,GO:0003674,GO:0005488,GO:0005575,GO:0005622,GO:0005623,GO:0005737,GO:0005814,GO:0005815,GO:0005819,GO:0005856,GO:0008144,GO:0015630,GO:0016594,GO:0016595,GO:0016596,GO:0016597,GO:0031406,GO:0036094,GO:0042165,GO:0043167,GO:0043168,GO:0043169,GO:0043177,GO:0043226,GO:0043228,GO:0043229,GO:0043232,GO:0044422,GO:0044424,GO:0044430,GO:0044444,GO:0044446,GO:0044450,GO:0044464,GO:0097159,GO:…	-	ko:K08471,ko:K16458	7tm_6,Peptidase_M2,UVR,XRCC1_N
g15226.t1	S	Transposase	-	-	-	-	DDE_3,DUF1258,HTH_23,HTH_28,HTH_32,HTH_Tnp_Tc3_2,PAX
g15227.t1	E	K02A2.6-like	-	-	-	-	Asp_protease,Asp_protease_2,PHD,RVP,RVT_1,RVT_2,Retrotrans_gag,SCAN,gag-asp_proteas,gag_pre-integrs,rve,zf-CCHC,zf-H2C2
g15228.t1	E	K02A2.6-like	-	-	-	-	Asp_protease_2,DDE_Tnp_4,DUF1759,HTH_Tnp_4,PHD,PNMA,RVP_2,RVT_1,SCAN,SRCR,Suppressor_APC,TatD_DNase,Zona_pellucida,gag-asp_proteas,rve,zf-CCHC,zf-H2C2
g15230.t1	I	Belongs to the calycin superfamily. Fatty-acid binding protein (FABP) family	FABP3	GO:0000003,GO:0000323,GO:0001101,GO:0001654,GO:0001669,GO:0001675,GO:0001775,GO:0001816,GO:0001932,GO:0001933,GO:0001964,GO:0001972,GO:0002252,GO:0002263,GO:0002274,GO:0002275,GO:0002283,GO:0002366,GO:0002376,GO:0002443,GO:0002444,GO:0002446,GO:0003006,GO:0003008,GO:0003407,GO:0003674,GO:0005102,GO:0005215,GO:0005319,GO:0005324,GO:0005488,GO:0005496,GO:0005501,GO:0005504,GO:0005515,GO:0005575,GO:…	-	ko:K08752,ko:K08753,ko:K08754,ko:K08756,ko:K17289	Lipocalin,Lipocalin_7
g15231.t1	T	Natriuretic peptide receptor	NPR1	GO:0000166,GO:0001558,GO:0001653,GO:0001882,GO:0001883,GO:0003008,GO:0003013,GO:0003014,GO:0003018,GO:0003674,GO:0003824,GO:0004383,GO:0004888,GO:0004930,GO:0005488,GO:0005515,GO:0005525,GO:0005575,GO:0005622,GO:0005623,GO:0005737,GO:0005829,GO:0005886,GO:0005887,GO:0006139,GO:0006163,GO:0006164,GO:0006182,GO:0006584,GO:0006725,GO:0006753,GO:0006793,GO:0006796,GO:0006807,GO:0006810,GO:0006935,GO:…	4.6.1.2	ko:K12323,ko:K12324,ko:K12325,ko:K13140	ANF_receptor,Dimer_Tnp_hAT,Guanylate_cyc,HNOBA,Ints3,Pkinase,Pkinase_Tyr
g15356.t1	O	It is involved in the biological process described with proteolysis	mep1b	-	3.4.24.63	ko:K08606	Astacin,DUF1891,MAM
g15357.t1	T	cubilin (intrinsic factor-cobalamin receptor)	cubn	-	-	ko:K14616	CUB,EGF,EGF_3,EGF_CA,TSP_1,hEGF
g15358.t1	S	Transposase IS4	-	GO:0005575,GO:0005622,GO:0005623,GO:0005634,GO:0005654,GO:0016604,GO:0031974,GO:0031981,GO:0043226,GO:0043227,GO:0043229,GO:0043231,GO:0043233,GO:0044422,GO:0044424,GO:0044428,GO:0044446,GO:0044451,GO:0044464,GO:0070013	-	-	DDE_Tnp_1_7
g15360.t1	T	It is involved in the biological process described with	-	GO:0003674,GO:0003824,GO:0004383,GO:0005575,GO:0005622,GO:0005623,GO:0005737,GO:0005829,GO:0005886,GO:0005887,GO:0006139,GO:0006163,GO:0006164,GO:0006182,GO:0006725,GO:0006753,GO:0006793,GO:0006796,GO:0006807,GO:0007154,GO:0007165,GO:0008074,GO:0008150,GO:0008152,GO:0009058,GO:0009117,GO:0009150,GO:0009152,GO:0009165,GO:0009187,GO:0009190,GO:0009259,GO:0009260,GO:0009975,GO:0009987,GO:0016020,GO:…	4.6.1.2	ko:K12323,ko:K12324	ANF_receptor,Ank_2,Guanylate_cyc,HNOBA,Pkinase,Pkinase_Tyr
g15361.t1	T	It is involved in the biological process described with	-	GO:0003674,GO:0003824,GO:0004383,GO:0005575,GO:0005622,GO:0005623,GO:0005737,GO:0005829,GO:0005886,GO:0005887,GO:0006139,GO:0006163,GO:0006164,GO:0006182,GO:0006725,GO:0006753,GO:0006793,GO:0006796,GO:0006807,GO:0007154,GO:0007165,GO:0008074,GO:0008150,GO:0008152,GO:0009058,GO:0009117,GO:0009150,GO:0009152,GO:0009165,GO:0009187,GO:0009190,GO:0009259,GO:0009260,GO:0009975,GO:0009987,GO:0016020,GO:…	4.6.1.2	ko:K12323,ko:K12324	ANF_receptor,Ank_2,Guanylate_cyc,HNOBA,Pkinase,Pkinase_Tyr
g15362.t1	C	oxygen carrier activity	HBQ1	-	-	ko:K13822,ko:K13827,ko:K21893,ko:K21894	Globin
g15434.t1	EO	ERAP1-like C-terminal domain	-	GO:0007275,GO:0008150,GO:0009790,GO:0009792,GO:0010564,GO:0032501,GO:0032502,GO:0043900,GO:0045595,GO:0046662,GO:0048856,GO:0050789,GO:0050793,GO:0050794,GO:0050795,GO:0051239,GO:0051445,GO:0051726,GO:0060281,GO:0060284,GO:0065007,GO:1900193,GO:1903429,GO:1903538,GO:1905879,GO:2000241	3.4.11.2	ko:K11140	ERAP1_C,PBP_GOBP,Peptidase_M1
g15436.t1	T	Calcium ion binding	KCNIP4	GO:0000122,GO:0000287,GO:0000976,GO:0001046,GO:0001047,GO:0001067,GO:0001508,GO:0003008,GO:0003012,GO:0003674,GO:0003676,GO:0003677,GO:0003690,GO:0003712,GO:0003714,GO:0005048,GO:0005215,GO:0005216,GO:0005244,GO:0005249,GO:0005250,GO:0005261,GO:0005267,GO:0005488,GO:0005509,GO:0005513,GO:0005515,GO:0005575,GO:0005622,GO:0005623,GO:0005634,GO:0005737,GO:0005829,GO:0005886,GO:0005887,GO:0006355,GO:…	-	ko:K19932	EF-hand_1,EF-hand_5,EF-hand_7,EF-hand_8,Rad60-SLD,YL1
g15493.t1	S	oxidation-reduction process	-	-	-	-	Exo_endo_phos_2,Herpes_teg_N
g15507.t1	-	-	-	-	-	-	C1q
g15508.t1	U	protein transport from ciliary membrane to plasma membrane	ARL6	GO:0000166,GO:0001654,GO:0001882,GO:0001883,GO:0003008,GO:0003407,GO:0003674,GO:0003824,GO:0003924,GO:0005488,GO:0005525,GO:0005543,GO:0005575,GO:0005622,GO:0005623,GO:0005737,GO:0005829,GO:0005856,GO:0005874,GO:0005879,GO:0005881,GO:0005886,GO:0005929,GO:0005930,GO:0006464,GO:0006471,GO:0006605,GO:0006612,GO:0006807,GO:0006810,GO:0006886,GO:0006996,GO:0007154,GO:0007165,GO:0007166,GO:0007264,GO:…	-	ko:K07951,ko:K07977	Arf,Sugar_tr,Transmemb_17
g15508.t2	U	protein transport from ciliary membrane to plasma membrane	ARL6	GO:0000166,GO:0001654,GO:0001882,GO:0001883,GO:0003008,GO:0003407,GO:0003674,GO:0003824,GO:0003924,GO:0005488,GO:0005525,GO:0005543,GO:0005575,GO:0005622,GO:0005623,GO:0005737,GO:0005829,GO:0005856,GO:0005874,GO:0005879,GO:0005881,GO:0005886,GO:0005929,GO:0005930,GO:0006464,GO:0006471,GO:0006605,GO:0006612,GO:0006807,GO:0006810,GO:0006886,GO:0006996,GO:0007154,GO:0007165,GO:0007166,GO:0007264,GO:…	-	ko:K07951,ko:K07977	Arf,Sugar_tr,Transmemb_17
g15509.t1	GO	WSC domain-containing protein	-	-	-	-	O-FucT,Sulfotransfer_1,WSC
g7.t1	E	Low-density lipoprotein receptor domain class A	TMPRSS15	GO:0005575,GO:0005623,GO:0005903,GO:0006508,GO:0006807,GO:0007586,GO:0008150,GO:0008152,GO:0010467,GO:0016020,GO:0016485,GO:0019538,GO:0031638,GO:0032023,GO:0032501,GO:0043170,GO:0044238,GO:0044256,GO:0044464,GO:0051604,GO:0071704,GO:0098862,GO:1901564	3.4.21.9	ko:K01316,ko:K09614	CUB,EGF,Fz,HATPase_c_3,Ldl_recept_a,MAM,SEA,SMC_hinge,SRCR,SRCR_2,TSP_1,Trypsin
g8.t1	T	Kinase-like	MAP3K4	GO:0000003,GO:0000131,GO:0000160,GO:0000161,GO:0000165,GO:0000166,GO:0000186,GO:0001672,GO:0001708,GO:0001890,GO:0001932,GO:0001934,GO:0002251,GO:0002376,GO:0002385,GO:0003002,GO:0003006,GO:0003674,GO:0003779,GO:0003824,GO:0004672,GO:0004674,GO:0004690,GO:0004691,GO:0004709,GO:0004713,GO:0005488,GO:0005515,GO:0005524,GO:0005575,GO:0005622,GO:0005623,GO:0005737,GO:0005829,GO:0005933,GO:0005934,GO:…	2.7.11.25	ko:K04428,ko:K11230	CCDC142,CHCH,FNIP,MATH,PAS,Pkinase
g9.t1	O	Astacin (Peptidase family M12A)	ASTL	GO:0000003,GO:0001775,GO:0003674,GO:0003824,GO:0005575,GO:0005622,GO:0005623,GO:0005737,GO:0005886,GO:0006508,GO:0006807,GO:0007155,GO:0007338,GO:0007343,GO:0008150,GO:0008152,GO:0008233,GO:0009566,GO:0009893,GO:0009987,GO:0010468,GO:0010604,GO:0010628,GO:0010954,GO:0012505,GO:0016020,GO:0016787,GO:0019222,GO:0019538,GO:0019953,GO:0022414,GO:0022610,GO:0030133,GO:0030141,GO:0030162,GO:0031323,GO:…	3.4.24.66,3.4.24.67	ko:K08778,ko:K18542,ko:K18543	Astacin,CUB,F5_F8_type_C,Laminin_G_3,Lectin_C,MAM,Methyltransf_FA,Ricin_B_lectin,ShK,TSP_1,VWD
g109.t1	T	endodermal-mesodermal cell signaling	BMP4	GO:0000003,GO:0000122,GO:0000186,GO:0000187,GO:0000302,GO:0000578,GO:0001101,GO:0001501,GO:0001503,GO:0001525,GO:0001541,GO:0001568,GO:0001649,GO:0001654,GO:0001655,GO:0001656,GO:0001657,GO:0001658,GO:0001666,GO:0001667,GO:0001700,GO:0001701,GO:0001703,GO:0001704,GO:0001705,GO:0001707,GO:0001708,GO:0001709,GO:0001710,GO:0001712,GO:0001715,GO:0001745,GO:0001759,GO:0001763,GO:0001822,GO:0001823,GO:…	-	ko:K04662,ko:K20013,ko:K21283	TGF_beta,TGFb_propeptide
g170.t1	U	Belongs to the MIP aquaporin (TC 1.A.8) family	AQP12B	GO:0005575,GO:0005622,GO:0005623,GO:0005737,GO:0044424,GO:0044464	-	ko:K09871,ko:K09884	MIP
g173.t1	G	lunatic fringe	LFNG	GO:0000003,GO:0000139,GO:0001541,GO:0001654,GO:0001708,GO:0001745,GO:0001756,GO:0001775,GO:0002009,GO:0002165,GO:0002252,GO:0002263,GO:0002285,GO:0002312,GO:0002313,GO:0002315,GO:0002335,GO:0002366,GO:0002376,GO:0002520,GO:0002521,GO:0003002,GO:0003006,GO:0003674,GO:0003824,GO:0005575,GO:0005576,GO:0005622,GO:0005623,GO:0005737,GO:0005783,GO:0005794,GO:0005795,GO:0005797,GO:0005975,GO:0005996,GO:…	2.4.1.222	ko:K05948	DUF3835,Fringe
g174.t1	O	Glycoside hydrolase family 45 protein	-	GO:0005575,GO:0005576	-	-	CBM_1,Glyco_hydro_45
g299.t1	L	DNA integration	GIN1	-	-	-	Dimer_Tnp_hAT,rve,zf-H2C2
g301.t1	T	guanylate cyclase activity	-	GO:0003674,GO:0003824,GO:0004383,GO:0005575,GO:0005622,GO:0005623,GO:0005737,GO:0005829,GO:0005886,GO:0005887,GO:0006139,GO:0006163,GO:0006164,GO:0006182,GO:0006725,GO:0006753,GO:0006793,GO:0006796,GO:0006807,GO:0007154,GO:0007165,GO:0008074,GO:0008150,GO:0008152,GO:0009058,GO:0009117,GO:0009150,GO:0009152,GO:0009165,GO:0009187,GO:0009190,GO:0009259,GO:0009260,GO:0009975,GO:0009987,GO:0016020,GO:…	4.6.1.2	ko:K12323,ko:K12324,ko:K12325	ANF_receptor,Ank_2,Guanylate_cyc,HNOBA,Pkinase,Pkinase_Tyr
g516.t1	-	-	-	-	-	-	7TM_GPCR_Srw,DNA_pol_B_2
g520.t1	S	oxidation-reduction process	-	-	-	-	Exo_endo_phos_2,Herpes_teg_N
g717.t1	T	Natriuretic peptide receptor	NPR1	GO:0000166,GO:0001558,GO:0001653,GO:0001882,GO:0001883,GO:0003008,GO:0003013,GO:0003014,GO:0003018,GO:0003674,GO:0003824,GO:0004383,GO:0004888,GO:0004930,GO:0005488,GO:0005515,GO:0005525,GO:0005575,GO:0005622,GO:0005623,GO:0005737,GO:0005829,GO:0005886,GO:0005887,GO:0006139,GO:0006163,GO:0006164,GO:0006182,GO:0006584,GO:0006725,GO:0006753,GO:0006793,GO:0006796,GO:0006807,GO:0006810,GO:0006935,GO:…	4.6.1.2	ko:K12323,ko:K12324,ko:K12325,ko:K13140	ANF_receptor,Dimer_Tnp_hAT,Guanylate_cyc,HNOBA,Ints3,Pkinase,Pkinase_Tyr
g718.t1	U	Prenylated Rab acceptor protein	RABAC1	GO:0003674,GO:0005488,GO:0005515,GO:0005575,GO:0005622,GO:0005623,GO:0005737,GO:0005768,GO:0005773,GO:0005774,GO:0005783,GO:0005794,GO:0005802,GO:0005829,GO:0006810,GO:0008022,GO:0008150,GO:0012505,GO:0016020,GO:0016021,GO:0016032,GO:0016192,GO:0030674,GO:0031090,GO:0031224,GO:0031410,GO:0031982,GO:0031984,GO:0040011,GO:0042802,GO:0043226,GO:0043227,GO:0043229,GO:0043231,GO:0044000,GO:0044403,GO:…	1.14.13.112	ko:K12638,ko:K19496,ko:K20359	Anoct_dimer,Anoctamin,ChaC,LRRNT_2,LRR_8,MIF,MatE,PRA1,Pkinase_Tyr,Ribosomal_S19,TAP42,Thioredoxin,p450
g719.t1	-	-	-	-	-	-	7TM_GPCR_Srw,DNA_pol_B_2
g720.t1	-	-	-	-	-	-	7TM_GPCR_Srw,DNA_pol_B_2
g1334.t1	S	biological adhesion	VWF	GO:0000003,GO:0001101,GO:0001775,GO:0001889,GO:0001890,GO:0002020,GO:0002237,GO:0002576,GO:0003006,GO:0003674,GO:0005102,GO:0005178,GO:0005488,GO:0005515,GO:0005518,GO:0005575,GO:0005576,GO:0005615,GO:0005622,GO:0005623,GO:0005737,GO:0005783,GO:0005886,GO:0006807,GO:0006810,GO:0006887,GO:0006950,GO:0007155,GO:0007275,GO:0007584,GO:0007596,GO:0007597,GO:0007599,GO:0008150,GO:0008152,GO:0009266,GO:…	-	ko:K03900	Anoct_dimer,Anoctamin,C8,CAP,CUE,Cys_knot,GLEYA,TIL,VWA,VWA_N2,VWC,VWD
g1335.t1	E	K02A2.6-like	-	-	-	-	Asp_protease_2,DDE_Tnp_4,DUF1759,HTH_Tnp_4,PHD,PNMA,RVP_2,RVT_1,SCAN,SRCR,Suppressor_APC,TatD_DNase,Zona_pellucida,gag-asp_proteas,rve,zf-CCHC,zf-H2C2
g1845.t1	T	mitogen-activated protein kinase	MAPK3	GO:0000003,GO:0000165,GO:0000166,GO:0000187,GO:0000278,GO:0000302,GO:0000746,GO:0000747,GO:0000749,GO:0000750,GO:0000902,GO:0000904,GO:0001402,GO:0001403,GO:0001501,GO:0001654,GO:0001676,GO:0001745,GO:0001751,GO:0001752,GO:0001754,GO:0001775,GO:0001784,GO:0001817,GO:0001819,GO:0001932,GO:0001933,GO:0001934,GO:0002009,GO:0002165,GO:0002237,GO:0002252,GO:0002253,GO:0002376,GO:0002429,GO:0002431,GO:…	2.7.11.24,3.1.4.39	ko:K04371,ko:K04464,ko:K22387	GDPD,Pkinase
g1846.t1	O	Cathepsin propeptide inhibitor domain (I29)	Cp1	GO:0000323,GO:0003674,GO:0003824,GO:0004175,GO:0004197,GO:0005488,GO:0005515,GO:0005575,GO:0005576,GO:0005615,GO:0005622,GO:0005623,GO:0005737,GO:0005764,GO:0005773,GO:0006508,GO:0006807,GO:0008150,GO:0008152,GO:0008233,GO:0008234,GO:0009056,GO:0009057,GO:0009987,GO:0016787,GO:0019538,GO:0030163,GO:0031974,GO:0031982,GO:0031983,GO:0042718,GO:0043170,GO:0043226,GO:0043227,GO:0043229,GO:0043231,GO:…	3.4.22.15	ko:K01365	Inhibitor_I29,Peptidase_C1
g1847.t1	O	Belongs to the peptidase C1 family	CTSL	GO:0000003,GO:0000323,GO:0001701,GO:0001890,GO:0001892,GO:0001893,GO:0001942,GO:0001968,GO:0001974,GO:0002009,GO:0002250,GO:0002376,GO:0002478,GO:0002495,GO:0002504,GO:0003006,GO:0003674,GO:0003824,GO:0004175,GO:0004177,GO:0004180,GO:0004197,GO:0004252,GO:0005488,GO:0005515,GO:0005518,GO:0005575,GO:0005576,GO:0005615,GO:0005622,GO:0005623,GO:0005634,GO:0005730,GO:0005737,GO:0005764,GO:0005768,GO:…	3.4.14.1,3.4.18.1,3.4.22.1,3.4.22.15,3.4.22.16,3.4.22.27,3.4.22.38,3.4.22.43	ko:K01275,ko:K01363,ko:K01365,ko:K01366,ko:K01368,ko:K01371,ko:K01375,ko:K08568,ko:K09599,ko:K09600,ko:K09601	7tm_1,AA_permease,CathepsinC_exc,Inhibitor_I29,Peptidase_C1,Propeptide_C1
g1851.t1	O	It is involved in the biological process described with proteolysis	mep1b	-	3.4.24.63	ko:K08606	Astacin,DUF1891,MAM
g2833.t1	O	endopeptidase inhibitor activity	CD109	GO:0000768,GO:0001932,GO:0001933,GO:0001942,GO:0002376,GO:0002520,GO:0002521,GO:0002573,GO:0002576,GO:0003674,GO:0005488,GO:0005515,GO:0005575,GO:0005576,GO:0005615,GO:0005622,GO:0005623,GO:0005737,GO:0005886,GO:0006810,GO:0006887,GO:0006949,GO:0006950,GO:0006952,GO:0007275,GO:0008150,GO:0008285,GO:0008544,GO:0009605,GO:0009607,GO:0009617,GO:0009620,GO:0009653,GO:0009888,GO:0009892,GO:0009966,GO:…	-	ko:K06530	A2M,A2M_N,A2M_N_2,A2M_comp,A2M_recep,DUF1891,TLV_coat,Thiol-ester_cl,VIR_N
g2884.t1	L	Belongs to the helicase family	-	-	3.6.4.12	ko:K15255	CVNH,DDE_1,DUF659,FAR1,GMC_oxred_C,GMC_oxred_N,Helitron_like_N,Herpes_Helicase,MULE,PIF1,RVP_2
g2885.t1	-	-	-	-	-	-	Helitron_like_N
g3207.t1	O	Alpha-2-Macroglobulin	CD109	GO:0000768,GO:0001932,GO:0001933,GO:0001942,GO:0002376,GO:0002520,GO:0002521,GO:0002573,GO:0002576,GO:0003674,GO:0005488,GO:0005515,GO:0005575,GO:0005576,GO:0005615,GO:0005622,GO:0005623,GO:0005737,GO:0005886,GO:0006810,GO:0006887,GO:0006949,GO:0006950,GO:0006952,GO:0007275,GO:0008150,GO:0008285,GO:0008544,GO:0009605,GO:0009607,GO:0009617,GO:0009620,GO:0009653,GO:0009888,GO:0009892,GO:0009966,GO:…	-	ko:K06530	A2M,A2M_N,A2M_N_2,A2M_comp,A2M_recep,DUF1891,TLV_coat,Thiol-ester_cl,VIR_N
g3209.t1	T	It is involved in the biological process described with protein phosphorylation	MAP3K4	GO:0000003,GO:0000131,GO:0000160,GO:0000161,GO:0000165,GO:0000166,GO:0000186,GO:0001672,GO:0001708,GO:0001890,GO:0001932,GO:0001934,GO:0002251,GO:0002376,GO:0002385,GO:0003002,GO:0003006,GO:0003674,GO:0003779,GO:0003824,GO:0004672,GO:0004674,GO:0004690,GO:0004691,GO:0004709,GO:0004713,GO:0005488,GO:0005515,GO:0005524,GO:0005575,GO:0005622,GO:0005623,GO:0005737,GO:0005829,GO:0005933,GO:0005934,GO:…	2.7.11.25	ko:K04428,ko:K11230	CCDC142,CHCH,FNIP,MATH,PAS,Pkinase
g3557.t1	-	-	-	-	-	-	MACPF,Notch
g3746.t1	E	K02A2.6-like	-	-	-	-	Asp_protease_2,DDE_Tnp_4,DUF1759,HTH_Tnp_4,PHD,PNMA,RVP_2,RVT_1,SCAN,SRCR,Suppressor_APC,TatD_DNase,Zona_pellucida,gag-asp_proteas,rve,zf-CCHC,zf-H2C2
g3747.t1	S	biological adhesion	VWF	GO:0000003,GO:0001101,GO:0001775,GO:0001889,GO:0001890,GO:0002020,GO:0002237,GO:0002576,GO:0003006,GO:0003674,GO:0005102,GO:0005178,GO:0005488,GO:0005515,GO:0005518,GO:0005575,GO:0005576,GO:0005615,GO:0005622,GO:0005623,GO:0005737,GO:0005783,GO:0005886,GO:0006807,GO:0006810,GO:0006887,GO:0006950,GO:0007155,GO:0007275,GO:0007584,GO:0007596,GO:0007597,GO:0007599,GO:0008150,GO:0008152,GO:0009266,GO:…	-	ko:K03900	Anoct_dimer,Anoctamin,C8,CAP,CUE,Cys_knot,GLEYA,TIL,VWA,VWA_N2,VWC,VWD
g4227.t1	-	-	-	-	-	-	7TM_GPCR_Srw,DNA_pol_B_2
g4297.t1	L	Integrase core domain	-	-	-	-	Baculo_F,Chromo,Pkinase,rve
g4298.t1	H	Integrase core domain	-	-	-	-	Baculo_F,Chromo,DUF4371,Pkinase,RVT_1,rve
g4937.t1	L	Integrase core domain	-	-	-	-	Baculo_F,Chromo,Pkinase,rve
g4939.t1	L	transposition, RNA-mediated	-	-	-	-	Baculo_F,Chromo,Pkinase,rve
g5279.t1	-	-	-	-	-	-	-
g5280.t1	H	Integrase core domain	-	-	-	-	Baculo_F,Chromo,DUF4371,Pkinase,RVT_1,rve
g5538.t1	H	E1-like activating enzyme involved in the 2 ubiquitin- like systems required for cytoplasm to vacuole transport (Cvt) and autophagy. Activates ATG12 for its conjugation with ATG5 and ATG8 for its conjugation with phosphatidylethanolamine. Both systems are needed for the ATG8 association to Cvt vesicles and autophagosomes membranes. Autophagy is essential for maintenance of amino acid levels and p…	ATG7	GO:0000003,GO:0000045,GO:0000302,GO:0000407,GO:0000422,GO:0000902,GO:0000904,GO:0001101,GO:0001775,GO:0001889,GO:0002119,GO:0002164,GO:0002165,GO:0002252,GO:0002263,GO:0002274,GO:0002275,GO:0002283,GO:0002366,GO:0002376,GO:0002443,GO:0002444,GO:0002446,GO:0002682,GO:0002697,GO:0002791,GO:0002793,GO:0002831,GO:0003006,GO:0003008,GO:0003674,GO:0003824,GO:0004839,GO:0005488,GO:0005515,GO:0005575,GO:…	3.5.4.12,3.6.4.13	ko:K01493,ko:K08337,ko:K13117	ATG7_N,DEAD,DUF2462,Glyco_hydro_12,HA2,Helicase_C,MNR,Pkinase,ThiF,dCMP_cyt_deam_1,mRNA_cap_C,mRNA_cap_enzyme
g5539.t1	H	Catalytic activity. It is involved in the biological process described with autophagy	ATG7	GO:0000003,GO:0000045,GO:0000302,GO:0000407,GO:0000422,GO:0000902,GO:0000904,GO:0001101,GO:0001775,GO:0001889,GO:0002119,GO:0002164,GO:0002165,GO:0002252,GO:0002263,GO:0002274,GO:0002275,GO:0002283,GO:0002366,GO:0002376,GO:0002443,GO:0002444,GO:0002446,GO:0002682,GO:0002697,GO:0002791,GO:0002793,GO:0002831,GO:0003006,GO:0003008,GO:0003674,GO:0003824,GO:0004839,GO:0005488,GO:0005515,GO:0005575,GO:…	3.5.4.12,3.6.4.13	ko:K01493,ko:K08337,ko:K13117	ATG7_N,DEAD,DUF2462,Glyco_hydro_12,HA2,Helicase_C,MNR,Pkinase,ThiF,dCMP_cyt_deam_1,mRNA_cap_C,mRNA_cap_enzyme
g5918.t1	-	-	-	-	-	-	7TM_GPCR_Srw,DNA_pol_B_2
g5975.t1	V	Belongs to the serpin family	SERPINB12	GO:0000323,GO:0001618,GO:0001775,GO:0001910,GO:0001911,GO:0001932,GO:0001933,GO:0002020,GO:0002244,GO:0002252,GO:0002263,GO:0002274,GO:0002275,GO:0002283,GO:0002366,GO:0002376,GO:0002443,GO:0002444,GO:0002446,GO:0002520,GO:0002682,GO:0002683,GO:0002697,GO:0002698,GO:0002703,GO:0002704,GO:0002706,GO:0002707,GO:0002715,GO:0002716,GO:0003674,GO:0004857,GO:0004866,GO:0004867,GO:0004869,GO:0005488,GO:…	-	ko:K13963,ko:K13966	Serpin
g5977.t1	L	K02A2.6-like	-	-	-	-	Asp_protease_2,HMGL-like,PNP_UDP_1,RVP,RVT_1,Retrotrans_gag,SCAN,Spuma_A9PTase,gag-asp_proteas,rve,zf-CCHC,zf-H2C2
g6141.t1	-	-	-	-	-	-	AIG1,CD20,DDE_Tnp_1_7,MMR_HSR1,Septin,fn3
g6791.t1	L	Integrase core domain	-	-	-	-	Baculo_F,Chromo,Pkinase,rve
g6793.t1	L	Integrase core domain	-	-	-	-	Baculo_F,Chromo,Pkinase,rve
g6810.t1	Z	actin binding	FLNB	GO:0000003,GO:0000226,GO:0000278,GO:0000280,GO:0000902,GO:0000904,GO:0001525,GO:0001568,GO:0001664,GO:0001725,GO:0001775,GO:0001837,GO:0001944,GO:0001974,GO:0002009,GO:0002011,GO:0002064,GO:0002065,GO:0002066,GO:0002376,GO:0002576,GO:0002682,GO:0002683,GO:0003006,GO:0003007,GO:0003008,GO:0003334,GO:0003382,GO:0003674,GO:0003779,GO:0005080,GO:0005102,GO:0005488,GO:0005515,GO:0005575,GO:0005576,GO:…	2.4.2.30	ko:K04437,ko:K15259	CH,FHA,Filamin,Gal-bind_lectin,SH3BGR
g6974.t1	-	-	-	-	-	-	zf-CCHC
g6992.t1	-	-	-	-	-	-	7TM_GPCR_Srw,DNA_pol_B_2
g7230.t1	L	transposition, RNA-mediated	-	-	-	-	Baculo_F,Chromo,Pkinase,rve
g7424.t1	-	-	-	-	-	-	7TM_GPCR_Srw,DNA_pol_B_2
g7425.t1	-	-	-	-	-	-	7TM_GPCR_Srw,DNA_pol_B_2,Rho_N
g7459.t1	L	transposition, RNA-mediated	-	-	-	-	rve
g11992.t1	L	Integrase core domain	-	-	-	-	Asp_protease_2,Baculo_F,Chromo,DUF4939,Glycoprotein_B,LMF1,RVP,RVP_2,RVT_1,RVT_3,Retrotrans_gag,gag-asp_proteas,rve,zf-CCHC,zf-H2C2
g12267.t1	H	Ribonuclease H protein	-	-	-	-	Chromo,DUF4371,MULE,Pox_A32,RVT_1,rve
g12375.t1	S	oxidation-reduction process	-	-	-	-	Exo_endo_phos_2,Herpes_teg_N
g13104.t1	-	-	-	-	-	-	7TM_GPCR_Srw,DNA_pol_B_2,Rho_N
g13109.t1	-	-	-	-	-	-	7TM_GPCR_Srw,DNA_pol_B_2,Rho_N
g14650.t1	-	-	-	-	-	-	7TM_GPCR_Srw,DNA_pol_B_2,Rho_N
g14711.t1	-	-	-	-	-	-	7TM_GPCR_Srw,DNA_pol_B_2,Rho_N
g500.t1	L	Reverse transcriptase (RNA-dependent DNA polymerase)	-	-	-	-	Asp_protease_2,RVP_2,RVT_1,gag-asp_proteas,rve,zf-CCHC,zf-H2C2
[truncated: 10,933 more rows]

## Sheet: hypexem
query	COG_category	Description	Preferred_name	GOs	EC	KEGG_ko	PFAMs
[truncated: 13,002 more rows]

## Sheet: parmetro
query	COG_category	Description	Preferred_name	GOs	EC	KEGG_ko	PFAMs
[truncated: 20,587 more rows]

## Sheet: rvar
query	COG_category	Description	Preferred_name	GOs	EC	KEGG_ko	PFAMs
[truncated: 12,724 more rows]
