# Supplementary material
Source: Research Square preprint supplement (doi:10.21203/rs.3.rs-8958382/v1)
Supplement: Supplementary file 2 [file e994dba4e1bda1665a31b9cc.xlsx]

## Sheet: Orthogroups
Orthogroup	cucumibius	hypexem	parmetro	rvar
OG0000000		OQV11597.1, OQV11944.1, OQV11945.1, OQV12364.1, OQV12535.1, OQV12923.1, OQV13586.1, OQV14058.1, OQV14059.1, OQV14309.1, OQV14585.1, OQV15305.1, OQV15455.1, OQV15456.1, OQV15818.1, OQV16822.1, OQV17095.1, OQV17096.1, OQV17289.1, OQV18610.1, OQV18733.1, OQV19463.1, OQV20237.1, OQV20450.1, OQV20691.1, OQV20692.1, OQV20694.1, OQV21416.1, OQV21417.1, OQV21418.1, OQV21620.1, OQV22053.1, OQV22538.1, OQV…	XP_055348756.1, XP_055348757.1	GAU87123.1, GAU87218.1, GAU87298.1, GAU87299.1, GAU87463.1, GAU87649.1, GAU87669.1, GAU87670.1, GAU88393.1, GAU88394.1, GAU88553.1, GAU88554.1, GAU88558.1, GAU88559.1, GAU88629.1, GAU88630.1, GAU88631.1, GAU88665.1, GAU88666.1, GAU88715.1, GAU88845.1, GAU88846.1, GAU88900.1, GAU88901.1, GAU89107.1, GAU89245.1, GAU89247.1, GAU89394.1, GAU89395.1, GAU89478.1, GAU89491.1, GAU89492.1, GAU89594.1, GAU…
OG0000001			XP_055328689.1, XP_055328716.1, XP_055330341.1, XP_055330417.1, XP_055330593.1, XP_055330594.1, XP_055330611.1, XP_055330720.1, XP_055330755.1, XP_055330756.1, XP_055330790.1, XP_055330809.1, XP_055332953.1, XP_055334165.1, XP_055334169.1, XP_055334170.1, XP_055334247.1, XP_055334312.1, XP_055334341.1, XP_055334951.1, XP_055334967.1, XP_055334968.1, XP_055334976.1, XP_055334982.1, XP_055335023.1,…
OG0000002	g12869.t1, g14250.t1, g4131.t1, g6354.t1, g6354.t2	OQV11573.1, OQV12123.1, OQV13407.1, OQV14746.1, OQV15014.1, OQV15015.1, OQV17133.1, OQV19112.1, OQV19119.1, OQV20668.1, OWA52029.1, OWA54829.1, OWA55109.1	XP_055328906.1, XP_055329387.1, XP_055339090.1, XP_055348362.1, XP_055352367.1, XP_055353441.1, XP_055357130.1	GAU87137.1, GAU87138.1, GAU87139.1, GAU87153.1, GAU87154.1, GAU87156.1, GAU87157.1, GAU87672.1, GAU87675.1, GAU87699.1, GAU87753.1, GAU88005.1, GAU88029.1, GAU88288.1, GAU88289.1, GAU88290.1, GAU88291.1, GAU88292.1, GAU88293.1, GAU88294.1, GAU89294.1, GAU89295.1, GAU89353.1, GAU89354.1, GAU89872.1, GAU90193.1, GAU90234.1, GAU90235.1, GAU90236.1, GAU90413.1, GAU90414.1, GAU90641.1, GAU90642.1, GAU…
OG0000003	g7845.t1	OQV12362.1, OQV13984.1, OQV16561.1, OQV21172.1, OQV22599.1, OQV23678.1, OWA51173.1, OWA54832.1, OWA55054.1, OWA55557.1	XP_055328433.1, XP_055330408.1, XP_055330549.1, XP_055337311.1, XP_055339179.1, XP_055340243.1, XP_055343125.1, XP_055344218.1, XP_055344557.1, XP_055347842.1, XP_055349060.1, XP_055351117.1, XP_055351118.1, XP_055351870.1, XP_055351928.1, XP_055352365.1, XP_055352366.1, XP_055353013.1, XP_055356532.1, XP_055357049.1, XP_055357290.1, XP_055357498.1	GAU87542.1, GAU87596.1, GAU87599.1, GAU87628.1, GAU88012.1, GAU88013.1, GAU88217.1, GAU88395.1, GAU89070.1, GAU89087.1, GAU89115.1, GAU89153.1, GAU89220.1, GAU89269.1, GAU89270.1, GAU89292.1, GAU89327.1, GAU89555.1, GAU89556.1, GAU89626.1, GAU89627.1, GAU89862.1, GAU89863.1, GAU89873.1, GAU89884.1, GAU90002.1, GAU90003.1, GAU90069.1, GAU90547.1, GAU90644.1, GAU90700.1, GAU90701.1, GAU90702.1, GAU…
OG0000004	g10100.t1, g10459.t1, g10463.t1, g11540.t1, g11765.t1, g13106.t1, g13126.t1, g13573.t1, g15173.t1, g15272.t1, g15273.t1, g15274.t1, g1944.t1, g195.t1, g195.t2, g2788.t1, g3608.t1, g3801.t1, g5970.t1, g6230.t1, g6230.t2, g6539.t1, g8377.t1, g8378.t1, g8380.t1	OQV11952.1, OQV12053.1, OQV12421.1, OQV12711.1, OQV12754.1, OQV13411.1, OQV13502.1, OQV13503.1, OQV13561.1, OQV13562.1, OQV14857.1, OQV15282.1, OQV15772.1, OQV15774.1, OQV15775.1, OQV15776.1, OQV16601.1, OQV16603.1, OQV16604.1, OQV16609.1, OQV16610.1, OQV16952.1, OQV17089.1, OQV17554.1, OQV17555.1, OQV17560.1, OQV17602.1, OQV17603.1, OQV17642.1, OQV17646.1, OQV17856.1, OQV17857.1, OQV17957.1, OQV…	XP_055334060.1, XP_055334061.1, XP_055335696.1, XP_055338433.1, XP_055345252.1, XP_055345253.1, XP_055345256.1, XP_055347686.1, XP_055347764.1, XP_055348114.1, XP_055349157.1, XP_055349188.1, XP_055350162.1, XP_055350163.1, XP_055352043.1	GAU90518.1, GAU94537.1, GAU94811.1, GAU94932.1, GAV00685.1, GAV00686.1, GAV00777.1, GAV01062.1, GAV01109.1, GAV02954.1, GAV04714.1, GAV06035.1, GAV06057.1, GAV06249.1, GAV06897.1, GAV06927.1, GAV08171.1, GAV08658.1, GAV09623.1
OG0000005	g10538.t1, g10671.t1, g10905.t1, g11055.t1, g11068.t1, g11069.t1, g11070.t1, g11117.t1, g11121.t1, g11123.t1, g11167.t1, g11189.t1, g11190.t1, g11191.t1, g11231.t1, g11232.t1, g11255.t1, g11282.t1, g11476.t1, g11808.t1, g11865.t1, g11929.t1, g1219.t1, g12274.t1, g12307.t1, g12308.t1, g1252.t1, g12526.t1, g1299.t1, g13275.t1, g1328.t1, g1336.t1, g13395.t1, g13486.t1, g1372.t1, g13770.t1, g13771.t1…	OQV24133.1, OQV24185.1, OWA50740.1
OG0000006			XP_055329605.1, XP_055329606.1, XP_055329608.1, XP_055329691.1, XP_055329692.1, XP_055329748.1, XP_055329894.1, XP_055330272.1, XP_055330273.1, XP_055330298.1, XP_055330514.1, XP_055330746.1, XP_055330747.1, XP_055330748.1, XP_055330749.1, XP_055330763.1, XP_055330767.1, XP_055330773.1, XP_055330774.1, XP_055331688.1, XP_055332421.1, XP_055332422.1, XP_055332467.1, XP_055332468.1, XP_055333043.1,…
OG0000007			XP_055327602.1, XP_055329588.1, XP_055329589.1, XP_055329613.1, XP_055329614.1, XP_055329616.1, XP_055329617.1, XP_055329836.1, XP_055329868.1, XP_055329991.1, XP_055330194.1, XP_055330195.1, XP_055330321.1, XP_055330329.1, XP_055330345.1, XP_055330372.1, XP_055330447.1, XP_055330448.1, XP_055330931.1, XP_055330932.1, XP_055330984.1, XP_055331084.1, XP_055335692.1, XP_055339047.1, XP_055339138.1,…
OG0000008			XP_055330110.1, XP_055330466.1, XP_055330989.1, XP_055330990.1, XP_055330991.1, XP_055330992.1, XP_055331263.1, XP_055331264.1, XP_055331265.1, XP_055332534.1, XP_055332535.1, XP_055333838.1, XP_055333839.1, XP_055333840.1, XP_055333841.1, XP_055334284.1, XP_055334285.1, XP_055334286.1, XP_055334287.1, XP_055334288.1, XP_055334289.1, XP_055334290.1, XP_055336707.1, XP_055336708.1, XP_055336709.1,…
OG0000009			XP_055327345.1, XP_055327585.1, XP_055327687.1, XP_055328652.1, XP_055328664.1, XP_055328676.1, XP_055328701.1, XP_055328753.1, XP_055328868.1, XP_055328926.1, XP_055329829.1, XP_055329859.1, XP_055329882.1, XP_055329884.1, XP_055330464.1, XP_055330526.1, XP_055330821.1, XP_055331633.1, XP_055332160.1, XP_055334081.1, XP_055334221.1, XP_055334248.1, XP_055334972.1, XP_055335025.1, XP_055335711.1,…
OG0000010			XP_055329929.1, XP_055330127.1, XP_055330153.1, XP_055330154.1, XP_055330155.1, XP_055330156.1, XP_055330157.1, XP_055330158.1, XP_055330173.1, XP_055330299.1, XP_055331588.1, XP_055331589.1, XP_055332514.1, XP_055332516.1, XP_055332573.1, XP_055332575.1, XP_055334334.1, XP_055334335.1, XP_055335897.1, XP_055341849.1, XP_055344680.1, XP_055344794.1, XP_055346549.1, XP_055347080.1, XP_055347081.1,…
OG0000011	g14348.t1	OQV13587.1, OQV13919.1, OQV15449.1, OQV15454.1, OQV16394.1, OQV18777.1, OQV20772.1, OQV20882.1, OQV21861.1, OQV22928.1, OQV24071.1, OQV25838.1, OQV25839.1, OQV25840.1, OQV25864.1, OWA50470.1, OWA52981.1, OWA53075.1, OWA53999.1	XP_055327384.1, XP_055328072.1, XP_055328073.1, XP_055328074.1, XP_055329609.1, XP_055329720.1, XP_055329721.1, XP_055329722.1, XP_055329723.1, XP_055330571.1, XP_055330572.1, XP_055332179.1, XP_055332311.1, XP_055335726.1, XP_055337134.1, XP_055337788.1, XP_055339157.1, XP_055339158.1, XP_055339159.1, XP_055339160.1, XP_055340250.1, XP_055341049.1, XP_055343516.1, XP_055343517.1, XP_055344928.1,…	GAU87352.1, GAU87353.1, GAU90388.1, GAU90416.1, GAU90493.1, GAU90494.1, GAU90643.1, GAU90646.1, GAU90679.1, GAU90716.1, GAU90748.1, GAU91118.1, GAU91120.1, GAU91121.1, GAU91196.1, GAU91197.1, GAU91413.1, GAU91623.1, GAU91756.1, GAU91757.1, GAU92213.1, GAU92579.1, GAU92580.1, GAU93518.1, GAU94378.1, GAU94691.1, GAU94936.1, GAU95299.1, GAU95300.1, GAU96870.1, GAU96871.1, GAU96967.1, GAU96968.1, GAU…
OG0000012			XP_055330128.1, XP_055330129.1, XP_055330187.1, XP_055330188.1, XP_055330189.1, XP_055330492.1, XP_055330493.1, XP_055331579.1, XP_055331580.1, XP_055331619.1, XP_055331620.1, XP_055331639.1, XP_055332115.1, XP_055332283.1, XP_055332492.1, XP_055332588.1, XP_055332589.1, XP_055346073.1, XP_055346081.1, XP_055347137.1, XP_055347156.1, XP_055347652.1, XP_055347784.1, XP_055347787.1, XP_055347910.1,…
OG0000013			XP_055327196.1, XP_055327205.1, XP_055327369.1, XP_055327376.1, XP_055327383.1, XP_055327391.1, XP_055327580.1, XP_055327714.1, XP_055327793.1, XP_055327938.1, XP_055328139.1, XP_055328341.1, XP_055329689.1, XP_055329690.1, XP_055329819.1, XP_055329835.1, XP_055330152.1, XP_055330300.1, XP_055330356.1, XP_055330357.1, XP_055330358.1, XP_055330374.1, XP_055330742.1, XP_055330743.1, XP_055330744.1,…
OG0000014			XP_055327852.1, XP_055329193.1, XP_055329325.1, XP_055330551.1, XP_055330582.1, XP_055331168.1, XP_055331169.1, XP_055333711.1, XP_055333712.1, XP_055333891.1, XP_055333908.1, XP_055333909.1, XP_055336715.1, XP_055336716.1, XP_055336717.1, XP_055336718.1, XP_055336736.1, XP_055337037.1, XP_055337046.1, XP_055337047.1, XP_055337049.1, XP_055339199.1, XP_055339230.1, XP_055339231.1, XP_055339232.1,…
OG0000015	g10275.t1		XP_055328532.1, XP_055328544.1, XP_055328557.1, XP_055332156.1, XP_055332302.1, XP_055332447.1, XP_055332462.1, XP_055332463.1, XP_055332464.1, XP_055332465.1, XP_055332509.1, XP_055332510.1, XP_055332563.1, XP_055332592.1, XP_055333724.1, XP_055333727.1, XP_055333728.1, XP_055333729.1, XP_055333738.1, XP_055333739.1, XP_055333922.1, XP_055333923.1, XP_055333924.1, XP_055333925.1, XP_055333926.1,…	GAU93318.1, GAU94020.1, GAU94021.1, GAU94022.1, GAU94049.1
OG0000016			XP_055327635.1, XP_055328789.1, XP_055330518.1, XP_055330521.1, XP_055330525.1, XP_055330527.1, XP_055330563.1, XP_055330573.1, XP_055330603.1, XP_055330604.1, XP_055330616.1, XP_055330617.1, XP_055330618.1, XP_055330619.1, XP_055330620.1, XP_055330630.1, XP_055330637.1, XP_055330638.1, XP_055330640.1, XP_055330641.1, XP_055330671.1, XP_055330672.1, XP_055330673.1, XP_055330674.1, XP_055330675.1,…
OG0000017		OQV11543.1, OQV11835.1, OQV13043.1, OQV13245.1, OQV13246.1, OQV13484.1, OQV14195.1, OQV14196.1, OQV14721.1, OQV16326.1, OQV17124.1, OQV17202.1, OQV17203.1, OQV17362.1, OQV17363.1, OQV17364.1, OQV18039.1, OQV18421.1, OQV18424.1, OQV20429.1, OQV20430.1, OQV20431.1, OQV21790.1, OQV21791.1, OQV21792.1, OQV21793.1, OQV22535.1, OQV23404.1, OQV23405.1, OQV23406.1, OQV23407.1, OWA49800.1, OWA50125.1, OWA…		GAU89222.1, GAU89438.1, GAU99813.1
OG0000018			XP_055328182.1, XP_055329817.1, XP_055330381.1, XP_055331585.1, XP_055331724.1, XP_055331777.1, XP_055332880.1, XP_055332881.1, XP_055333039.1, XP_055333990.1, XP_055339196.1, XP_055339395.1, XP_055340570.1, XP_055342249.1, XP_055342349.1, XP_055342614.1, XP_055342615.1, XP_055343079.1, XP_055343090.1, XP_055343092.1, XP_055343165.1, XP_055343493.1, XP_055343572.1, XP_055343629.1, XP_055343630.1,…
OG0000019	g2363.t1, g3926.t1	OQV12531.1, OQV12681.1, OQV14774.1, OQV14775.1, OQV14780.1, OQV15451.1, OQV16599.1, OQV21863.1, OQV22527.1, OQV22929.1, OQV23893.1, OWA51473.1, OWA51753.1, OWA51822.1, OWA52982.1, OWA53891.1	XP_055327217.1, XP_055334792.1, XP_055345042.1, XP_055355475.1	GAU87158.1, GAU87541.1, GAU88059.1, GAU89484.1, GAU89490.1, GAU89681.1, GAU90327.1, GAU90386.1, GAU90387.1, GAU90417.1, GAU90454.1, GAU90455.1, GAU90465.1, GAU90487.1, GAU90647.1, GAU90699.1, GAU90715.1, GAU91351.1, GAU91622.1, GAU91758.1, GAU91839.1, GAU92221.1, GAU92222.1, GAU92581.1, GAU92960.1, GAU93516.1, GAU94313.1, GAU94690.1, GAU94935.1, GAU95301.1, GAU95729.1, GAU96872.1, GAU97252.1, GAU…
OG0000020	g10150.t1, g10234.t1, g10501.t1, g10529.t1, g10529.t2, g10529.t3, g10635.t1, g10636.t1, g10913.t1, g10930.t1, g10953.t1, g11371.t1, g11740.t1, g11878.t1, g11882.t1, g119.t1, g121.t1, g12209.t1, g12210.t1, g12380.t1, g12397.t1, g12420.t1, g1249.t1, g12529.t1, g12875.t1, g12876.t1, g13007.t1, g13318.t1, g13401.t1, g13667.t1, g13668.t1, g1396.t1, g1396.t2, g14946.t1, g14946.t2, g14946.t3, g14946.t4,…
OG0000021		OQV11467.1, OQV11468.1, OQV11469.1, OQV11489.1, OQV11490.1, OQV11491.1, OQV11492.1, OQV11494.1, OQV12439.1, OQV12533.1, OQV12534.1, OQV13409.1, OQV13628.1, OQV13719.1, OQV13720.1, OQV13960.1, OQV13994.1, OQV13995.1, OQV13996.1, OQV13997.1, OQV15342.1, OQV16142.1, OQV16143.1, OQV16145.1, OQV16146.1, OQV16350.1, OQV16569.1, OQV16570.1, OQV16571.1, OQV16572.1, OQV17537.1, OQV19271.1, OQV19272.1, OQV…	XP_055336586.1, XP_055338447.1, XP_055350319.1	GAU92018.1, GAU92019.1, GAU99073.1
OG0000022			XP_055327528.1, XP_055330131.1, XP_055330771.1, XP_055335026.1, XP_055335043.1, XP_055339326.1, XP_055340743.1, XP_055340756.1, XP_055340763.1, XP_055342008.1, XP_055342020.1, XP_055342385.1, XP_055342401.1, XP_055342618.1, XP_055342625.1, XP_055342626.1, XP_055342633.1, XP_055344329.1, XP_055344330.1, XP_055344492.1, XP_055344714.1, XP_055347183.1, XP_055347261.1, XP_055347349.1, XP_055347390.1,…
OG0000023	g14574.t1, g5943.t1	OQV12853.1, OQV19376.1, OQV24208.1, OWA52440.1, OWA54175.1, OWA54176.1, OWA55060.1, OWA55061.1	XP_055334979.1, XP_055357212.1	GAU87811.1, GAU87812.1, GAU88399.1, GAU88400.1, GAU88401.1, GAU88632.1, GAU89391.1, GAU89392.1, GAU89393.1, GAU89649.1, GAU89650.1, GAU89875.1, GAU89876.1, GAU89877.1, GAU90365.1, GAU90366.1, GAU90412.1, GAU90418.1, GAU90419.1, GAU90420.1, GAU90421.1, GAU90422.1, GAU90566.1, GAU90645.1, GAU91434.1, GAU91840.1, GAU91841.1, GAU91842.1, GAU92371.1, GAU92372.1, GAU92373.1, GAU93120.1, GAU93121.1, GAU…
OG0000024	g10535.t1, g11130.t1, g11488.t1, g11906.t1, g1240.t1, g13108.t1, g13112.t1, g13432.t1, g13432.t2, g13705.t1, g13786.t1, g1415.t1, g14446.t1, g14664.t1, g14664.t2, g14903.t1, g15284.t1, g15387.t1, g15444.t1, g2453.t1, g2453.t2, g2509.t1, g5303.t1, g6019.t1, g6236.t1, g6240.t1, g6907.t1, g6907.t2, g832.t1, g9282.t1, g9323.t1, g9371.t1, g9418.t1	OQV12429.1, OQV12869.1, OQV12870.1, OQV12871.1, OQV12875.1, OQV12906.1, OQV12907.1, OQV14295.1, OQV14296.1, OQV14297.1, OQV14298.1, OQV14716.1, OQV18035.1, OQV19505.1, OQV19506.1, OQV19517.1, OQV19714.1, OQV19956.1, OQV19958.1, OQV20395.1, OQV23705.1, OQV25005.1, OQV25006.1, OQV25008.1, OWA50157.1, OWA50158.1, OWA50159.1, OWA50180.1, OWA50188.1, OWA50612.1, OWA50613.1, OWA50614.1, OWA51396.1, OWA…	XP_055347918.1, XP_055348094.1, XP_055348110.1, XP_055348112.1	GAU87657.1, GAU87658.1, GAU87660.1, GAU88942.1, GAU88943.1, GAU88944.1, GAU88945.1, GAU88946.1
OG0000025		OWA53752.1, OWA53814.1	XP_055340557.1, XP_055354979.1	GAU87136.1, GAU89486.1, GAU89487.1, GAU89773.1, GAU90618.1, GAU90619.1, GAU90708.1, GAU90726.1, GAU91183.1, GAU91184.1, GAU91185.1, GAU91339.1, GAU91340.1, GAU91804.1, GAU91805.1, GAU95276.1, GAU95277.1, GAU95278.1, GAU95848.1, GAU96097.1, GAU96098.1, GAU96099.1, GAU96100.1, GAU96172.1, GAU97329.1, GAU98982.1, GAU98983.1, GAU99274.1, GAU99733.1, GAU99734.1, GAU99855.1, GAU99976.1, GAU99977.1, GAV…
OG0000026	g11944.t1, g12707.t1, g13534.t1, g13929.t1, g15355.t1	OQV11493.1, OQV11544.1, OQV11545.1, OQV11547.1, OQV12296.1, OQV12447.1, OQV14322.1, OQV14323.1, OQV15002.1, OQV15008.1, OQV15679.1, OQV17408.1, OQV18041.1, OQV18042.1, OQV19433.1, OQV19642.1, OQV19850.1, OQV19851.1, OQV20842.1, OQV20843.1, OQV22694.1, OQV22695.1, OQV23273.1, OQV23433.1, OQV24132.1, OQV25096.1, OQV25164.1, OWA50502.1, OWA50594.1, OWA50836.1, OWA50837.1, OWA51344.1, OWA52644.1, OWA…	XP_055329967.1, XP_055344556.1, XP_055346109.1, XP_055351960.1, XP_055357431.1	GAU89144.1, GAU89145.1, GAU89485.1, GAU89631.1, GAU89632.1, GAU90661.1, GAU92891.1, GAU92892.1, GAU95363.1, GAU97074.1, GAU97102.1, GAU99057.1, GAV00077.1, GAV00504.1, GAV00505.1, GAV01008.1, GAV01386.1, GAV02885.1, GAV02887.1, GAV04158.1, GAV04159.1, GAV04160.1, GAV04524.1, GAV04552.1, GAV04942.1, GAV04995.1, GAV05131.1, GAV05134.1, GAV05318.1, GAV05319.1, GAV06002.1, GAV06259.1, GAV06260.1, GAV…
OG0000027				GAU87515.1, GAU87535.1, GAU88164.1, GAU89123.1, GAU89124.1, GAU89388.1, GAU89566.1, GAU89859.1, GAU90462.1, GAU91038.1, GAU91039.1, GAU91295.1, GAU91587.1, GAU92985.1, GAU92986.1, GAU92988.1, GAU93448.1, GAU93449.1, GAU93488.1, GAU94465.1, GAU94467.1, GAU94468.1, GAU94470.1, GAU94471.1, GAU94696.1, GAU96090.1, GAU96096.1, GAU96243.1, GAU96246.1, GAU96490.1, GAU96802.1, GAU97214.1, GAU97215.1, GAU…
OG0000028	g15162.t1	OQV15812.1, OQV20022.1	XP_055352992.1	GAU87663.1, GAU87664.1, GAU88988.1, GAU89303.1, GAU89304.1, GAU89305.1, GAU89445.1, GAU90457.1, GAU90458.1, GAU90459.1, GAU90689.1, GAU90695.1, GAU90696.1, GAU90697.1, GAU91401.1, GAU91402.1, GAU91565.1, GAU91651.1, GAU92040.1, GAU92043.1, GAU92044.1, GAU92678.1, GAU92699.1, GAU92715.1, GAU94550.1, GAU94706.1, GAU94707.1, GAU94708.1, GAU94861.1, GAU94864.1, GAU94865.1, GAU95070.1, GAU95071.1, GAU…
OG0000029	g14249.t1, g4986.t1, g5294.t1, g6263.t1, g9231.t1	OQV12295.1, OQV23000.1, OQV23001.1, OWA50457.1, OWA54656.1	XP_055330443.1, XP_055341993.1, XP_055342466.1, XP_055344088.1, XP_055352480.1, XP_055353547.1, XP_055353549.1, XP_055354891.1	GAU88006.1, GAU89401.1, GAU89402.1, GAU89403.1, GAU89404.1, GAU89501.1, GAU89795.1, GAU90376.1, GAU90377.1, GAU90378.1, GAU91338.1, GAU91421.1, GAU92235.1, GAU92236.1, GAU92277.1, GAU92278.1, GAU92437.1, GAU94855.1, GAU95249.1, GAU95303.1, GAU97736.1, GAU97737.1, GAU99163.1, GAU99306.1, GAU99307.1, GAU99610.1, GAU99611.1, GAU99910.1, GAU99911.1, GAU99912.1, GAU99913.1, GAU99996.1, GAV00101.1, GAV…
OG0000030		OQV11962.1, OQV11963.1, OQV11964.1, OQV12132.1, OQV14314.1, OQV15807.1, OQV17460.1, OQV19766.1, OQV22764.1, OQV22765.1, OQV23330.1, OQV24501.1, OQV25336.1, OWA51499.1, OWA51502.1, OWA51505.1, OWA51570.1, OWA53410.1, OWA53497.1, OWA53499.1, OWA55270.1	XP_055328905.1, XP_055332443.1, XP_055332444.1, XP_055332460.1, XP_055332497.1, XP_055332583.1, XP_055337959.1, XP_055345190.1, XP_055347085.1, XP_055347152.1, XP_055347175.1, XP_055347862.1, XP_055348501.1, XP_055348502.1, XP_055348503.1, XP_055348504.1, XP_055348522.1, XP_055348523.1, XP_055348530.1, XP_055348531.1, XP_055348532.1, XP_055348533.1, XP_055348536.1, XP_055348537.1, XP_055348538.1,…	GAU89634.1, GAV01357.1, GAV01367.1, GAV02922.1, GAV06851.1
OG0000031			XP_055327814.1, XP_055327864.1, XP_055328149.1, XP_055328453.1, XP_055330422.1, XP_055330423.1, XP_055330702.1, XP_055330703.1, XP_055332519.1, XP_055332550.1, XP_055332552.1, XP_055333725.1, XP_055333802.1, XP_055333877.1, XP_055333953.1, XP_055334027.1, XP_055334101.1, XP_055334185.1, XP_055335700.1, XP_055335928.1, XP_055336345.1, XP_055339217.1, XP_055339221.1, XP_055339222.1, XP_055339226.1,…
OG0000032	g10941.t1, g10942.t1, g10952.t1, g11027.t1, g11107.t1, g11108.t1, g11171.t1, g11178.t1, g11280.t1, g11590.t1, g11653.t1, g11654.t1, g11655.t1, g11657.t1, g11658.t1, g11659.t1, g11662.t1, g11746.t1, g12298.t1, g12389.t1, g12390.t1, g12391.t1, g12412.t1, g12413.t1, g12416.t1, g12417.t1, g1268.t1, g13131.t1, g13134.t1, g1329.t1, g13307.t1, g13308.t1, g13408.t1, g13442.t1, g1376.t1, g1379.t1, g13960.…			GAU87528.1, GAV04860.1
OG0000033		OQV12821.1, OQV13590.1, OQV13776.1, OQV16119.1, OQV17686.1, OQV17923.1, OQV20565.1, OWA50769.1	XP_055332094.1, XP_055334985.1, XP_055340969.1, XP_055344410.1, XP_055346537.1	GAU89074.1, GAU89463.1, GAU89820.1, GAU89933.1, GAU90230.1, GAU90324.1, GAU90662.1, GAU90753.1, GAU91041.1, GAU91138.1, GAU91381.1, GAU91382.1, GAU91538.1, GAU92359.1, GAU92360.1, GAU92889.1, GAU92890.1, GAU94213.1, GAU94379.1, GAU94380.1, GAU94387.1, GAU94977.1, GAU95437.1, GAU95438.1, GAU95467.1, GAU95641.1, GAU95800.1, GAU95826.1, GAU96249.1, GAU96353.1, GAU97010.1, GAU97062.1, GAU97071.1, GAU…
OG0000034			XP_055328105.1, XP_055329765.1, XP_055330260.1, XP_055330515.1, XP_055332159.1, XP_055336486.1, XP_055337921.1, XP_055339228.1, XP_055340295.1, XP_055340504.1, XP_055340505.1, XP_055342027.1, XP_055342028.1, XP_055343066.1, XP_055343654.1, XP_055344803.1, XP_055344879.1, XP_055345334.1, XP_055346024.1, XP_055347049.1, XP_055347058.1, XP_055347345.1, XP_055347467.1, XP_055347468.1, XP_055347469.1,…
OG0000035		OQV11595.1, OQV12849.1, OQV13559.1, OQV13560.1, OQV13636.1, OQV13642.1, OQV14366.1, OQV17411.1, OQV17412.1, OQV17414.1, OQV20369.1, OQV21590.1, OQV23276.1, OQV23277.1, OQV24111.1, OQV24113.1, OQV24128.1, OQV24129.1, OQV24165.1, OWA50377.1, OWA50482.1, OWA50487.1, OWA50507.1, OWA50635.1, OWA50636.1, OWA50640.1, OWA50642.1, OWA50647.1, OWA50648.1, OWA50649.1, OWA50650.1, OWA50652.1, OWA51346.1, OWA…
OG0000036	g11545.t1, g9814.t1	OQV15754.1, OQV16821.1, OQV17649.1, OQV17876.1, OQV19786.1, OQV22985.1, OWA50092.1, OWA51278.1	XP_055329421.1, XP_055331221.1, XP_055332309.1, XP_055339621.1, XP_055341969.1, XP_055342334.1, XP_055344223.1, XP_055344846.1, XP_055345269.1, XP_055348000.1, XP_055348117.1, XP_055348838.1, XP_055349054.1, XP_055349413.1, XP_055351212.1, XP_055351872.1, XP_055353196.1, XP_055354354.1, XP_055355412.1, XP_055356564.1	GAU87165.1, GAU87166.1, GAU88330.1, GAU88549.1, GAU88550.1, GAU89278.1, GAU89279.1, GAU89311.1, GAU89312.1, GAU89750.1, GAU89787.1, GAU90075.1, GAU91098.1, GAU91445.1, GAU91501.1, GAU92514.1, GAU93192.1, GAU93734.1, GAU94084.1, GAU94461.1, GAU94733.1, GAU94737.1, GAU94738.1, GAU96533.1, GAU96534.1, GAU97547.1, GAU97703.1, GAU99370.1, GAV00307.1, GAV00308.1, GAV00419.1, GAV03104.1, GAV04956.1, GAV…
OG0000037		OQV20793.1, OWA50384.1, OWA50385.1, OWA50829.1, OWA51408.1, OWA51409.1, OWA51410.1, OWA54364.1	XP_055329877.1, XP_055336857.1, XP_055352694.1, XP_055354003.1, XP_055355335.1, XP_055356458.1	GAU87259.1, GAU89158.1, GAU89258.1, GAU91193.1, GAU91417.1, GAU91418.1, GAU91419.1, GAU91706.1, GAU91809.1, GAU91859.1, GAU92042.1, GAU94455.1, GAU94627.1, GAU94628.1, GAU94629.1, GAU95085.1, GAU95184.1, GAU97127.1, GAU97128.1, GAU99785.1, GAU99786.1, GAU99798.1, GAV00878.1, GAV00938.1, GAV00939.1, GAV00940.1, GAV01185.1, GAV01506.1, GAV01508.1, GAV01509.1, GAV01510.1, GAV01523.1, GAV01524.1, GAV…
OG0000038			XP_055329620.1, XP_055329621.1, XP_055329622.1, XP_055329623.1, XP_055329631.1, XP_055329641.1, XP_055329643.1, XP_055329688.1, XP_055329712.1, XP_055329743.1, XP_055329798.1, XP_055330508.1, XP_055334300.1, XP_055335000.1, XP_055337968.1, XP_055340869.1, XP_055340893.1, XP_055340895.1, XP_055340896.1, XP_055340925.1, XP_055340926.1, XP_055340927.1, XP_055340978.1, XP_055340980.1, XP_055343091.1,…
OG0000039			XP_055328900.1, XP_055328901.1, XP_055329035.1, XP_055329036.1, XP_055329041.1, XP_055329258.1, XP_055329311.1, XP_055329381.1, XP_055329382.1, XP_055329383.1, XP_055329385.1, XP_055329432.1, XP_055329433.1, XP_055329458.1, XP_055329811.1, XP_055329812.1, XP_055329813.1, XP_055334955.1, XP_055334956.1, XP_055334957.1, XP_055334958.1, XP_055334959.1, XP_055334992.1, XP_055334993.1, XP_055334994.1,…
OG0000040		OQV11797.1, OQV12427.1, OQV12495.1, OQV12850.1, OQV16110.1, OQV16306.1, OQV16368.1, OQV17051.1, OQV17506.1, OQV17650.1, OQV17729.1, OQV19275.1, OQV19450.1, OQV20014.1, OQV20018.1, OQV22549.1, OQV22713.1, OQV22837.1, OQV22998.1, OQV22999.1, OQV23003.1, OQV23005.1, OQV23006.1, OQV23007.1, OQV23008.1, OQV23009.1, OQV23011.1, OQV23012.1, OQV23016.1, OQV23017.1, OQV23084.1, OQV23085.1, OQV23086.1, OQV…		GAU94234.1, GAU97208.1, GAV02870.1, GAV06723.1, GAV08334.1, GAV09471.1
OG0000041	g10543.t1, g7249.t1	OQV11596.1, OQV11615.1, OQV11781.1, OQV11973.1, OQV12082.1, OQV12434.1, OQV14991.1, OQV14993.1, OQV15019.1, OQV15020.1, OQV15021.1, OQV15022.1, OQV15057.1, OQV15413.1, OQV15757.1, OQV15760.1, OQV18998.1, OQV19762.1, OQV19779.1, OQV19780.1, OQV19972.1, OQV19999.1, OQV20019.1, OQV20028.1, OQV20032.1, OQV20033.1, OQV20034.1, OQV20045.1, OQV20048.1, OQV21595.1, OQV21981.1, OQV21982.1, OQV21983.1, OQV…
OG0000042			XP_055328844.1, XP_055330339.1, XP_055330346.1, XP_055330352.1, XP_055332542.1, XP_055336757.1, XP_055336758.1, XP_055339111.1, XP_055339112.1, XP_055339131.1, XP_055339132.1, XP_055339178.1, XP_055339186.1, XP_055339187.1, XP_055339204.1, XP_055339214.1, XP_055339215.1, XP_055339223.1, XP_055340977.1, XP_055341000.1, XP_055343061.1, XP_055343110.1, XP_055343119.1, XP_055343133.1, XP_055343146.1,…
OG0000043		OQV13243.1, OQV13244.1, OQV13250.1, OQV13251.1, OQV14996.1, OQV15437.1, OQV15438.1, OQV15439.1, OQV15440.1, OQV15442.1, OQV15443.1, OQV15444.1, OQV15445.1, OQV15447.1, OQV15448.1, OQV15452.1, OQV18425.1, OQV18426.1, OQV18428.1, OQV18429.1, OQV21855.1, OQV21856.1, OQV21857.1, OQV21858.1, OQV24210.1, OQV24211.1, OQV24827.1, OQV24828.1, OQV25381.1, OWA51136.1, OWA51137.1, OWA51138.1, OWA51139.1, OWA…	XP_055331249.1, XP_055357446.1
OG0000044		OWA55055.1	XP_055334255.1, XP_055334343.1, XP_055335902.1, XP_055346321.1, XP_055349042.1	GAU87349.1, GAU88505.1, GAU88738.1, GAU89557.1, GAU89558.1, GAU89561.1, GAU89562.1, GAU89565.1, GAU89666.1, GAU89667.1, GAU89668.1, GAU89724.1, GAU90248.1, GAU90271.1, GAU90325.1, GAU91549.1, GAU91599.1, GAU91600.1, GAU91648.1, GAU91705.1, GAU92084.1, GAU92085.1, GAU92309.1, GAU92394.1, GAU92416.1, GAU95725.1, GAU96001.1, GAU96935.1, GAU97117.1, GAU97119.1, GAU97574.1, GAU99916.1, GAV00279.1, GAV…
OG0000045	g4142.t1	OQV17415.1	XP_055328171.1, XP_055328172.1, XP_055328173.1, XP_055328174.1, XP_055344040.1, XP_055344674.1, XP_055350264.1, XP_055352212.1, XP_055352688.1, XP_055354360.1, XP_055357105.1, XP_055357215.1	GAU89034.1, GAU89586.1, GAU91802.1, GAU91803.1, GAU91910.1, GAU91911.1, GAU92496.1, GAU92878.1, GAU92880.1, GAU93619.1, GAU93620.1, GAU93621.1, GAU94256.1, GAU94871.1, GAU94872.1, GAU94998.1, GAU98526.1, GAU99895.1, GAU99966.1, GAV00121.1, GAV00337.1, GAV00338.1, GAV00497.1, GAV00549.1, GAV00730.1, GAV00872.1, GAV00873.1, GAV00874.1, GAV03711.1, GAV04612.1, GAV04613.1, GAV05072.1, GAV06508.1, GAV…
OG0000046			XP_055336872.1, XP_055336883.1, XP_055336884.1, XP_055336885.1, XP_055336886.1, XP_055336888.1, XP_055336889.1, XP_055336890.1, XP_055336891.1, XP_055336892.1, XP_055336893.1, XP_055336894.1, XP_055336896.1, XP_055336897.1, XP_055336898.1, XP_055336899.1, XP_055336900.1, XP_055336901.1, XP_055336902.1, XP_055336903.1, XP_055336904.1, XP_055336934.1, XP_055336936.1, XP_055336937.1, XP_055336976.1,…
OG0000047	g4918.t1	OQV12732.1, OQV15377.1, OQV15378.1, OWA52907.1, OWA52909.1, OWA53813.1, OWA54943.1, OWA55512.1	XP_055351530.1, XP_055351531.1, XP_055351552.1, XP_055356256.1	GAU87135.1, GAU87462.1, GAU88402.1, GAU88403.1, GAU88556.1, GAU88557.1, GAU88717.1, GAU89405.1, GAU89406.1, GAU89407.1, GAU89793.1, GAU90496.1, GAU91780.1, GAU91781.1, GAU92289.1, GAU92435.1, GAU92436.1, GAU93451.1, GAU93452.1, GAU93453.1, GAU93454.1, GAU93815.1, GAU94771.1, GAU95075.1, GAU95289.1, GAU95304.1, GAU95305.1, GAU97258.1, GAU97259.1, GAU97733.1, GAU97734.1, GAU97735.1, GAU98141.1, GAU…
OG0000048	g10916.t1, g10917.t1, g10919.t1, g10924.t1, g11076.t1, g11126.t1, g11351.t1, g11757.t1, g12418.t1, g12419.t1, g13457.t1, g13498.t1, g13499.t1, g15360.t1, g15361.t1, g15489.t1, g1929.t1, g1930.t1, g221.t1, g2403.t1, g3053.t1, g3247.t1, g3512.t1, g370.t1, g373.t1, g3802.t1, g525.t1, g526.t1, g527.t1, g529.t1, g5917.t1, g6311.t1, g7463.t1, g7807.t1, g7808.t1, g8675.t1, g9602.t1	OQV21849.1	XP_055333898.1, XP_055334072.1, XP_055334075.1, XP_055344151.1, XP_055347021.1, XP_055350901.1, XP_055351616.1	GAU88777.1, GAU89908.1, GAU89909.1, GAV02728.1, GAV02823.1, GAV03792.1, GAV06181.1, GAV06435.1, GAV06469.1, GAV06470.1, GAV06497.1, GAV06502.1, GAV06503.1, GAV06506.1, GAV06514.1, GAV06515.1, GAV09530.1, GAV09540.1, GAV09541.1, GAV09609.1, GAV09610.1
OG0000049			XP_055329558.1, XP_055329559.1, XP_055329560.1, XP_055329561.1, XP_055329580.1, XP_055329822.1, XP_055329834.1, XP_055330475.1, XP_055330668.1, XP_055330669.1, XP_055330670.1, XP_055340198.1, XP_055340199.1, XP_055340213.1, XP_055340231.1, XP_055340249.1, XP_055340280.1, XP_055340281.1, XP_055340282.1, XP_055340291.1, XP_055340298.1, XP_055340299.1, XP_055340487.1, XP_055346128.1, XP_055347370.1,…
OG0000050			XP_055331152.1, XP_055331153.1, XP_055331157.1, XP_055331158.1, XP_055332284.1, XP_055332300.1, XP_055332376.1, XP_055332417.1, XP_055335702.1, XP_055335703.1, XP_055337348.1, XP_055338223.1, XP_055338224.1, XP_055338225.1, XP_055338226.1, XP_055338227.1, XP_055338229.1, XP_055344643.1, XP_055344678.1, XP_055344740.1, XP_055344749.1, XP_055344750.1, XP_055344751.1, XP_055344760.1, XP_055344761.1,…
OG0000051	g11262.t1, g15055.t1, g209.t1, g4041.t1, g5384.t1, g7260.t1, g841.t1, g8454.t1	OQV12021.1, OQV12185.1, OQV12346.1, OQV12349.1, OQV12417.1, OQV12595.1, OQV13809.1, OQV15356.1, OQV16762.1, OQV16768.1, OQV17310.1, OQV17313.1, OQV17314.1, OQV17315.1, OQV17358.1, OQV17396.1, OQV17397.1, OQV17398.1, OQV17400.1, OQV17401.1, OQV17402.1, OQV17404.1, OQV17425.1, OQV17426.1, OQV17427.1, OQV17429.1, OQV17431.1, OQV22754.1, OQV23083.1, OQV24159.1, OQV24701.1, OQV24702.1, OQV25379.1, OWA…	XP_055329965.1, XP_055330402.1, XP_055332329.1, XP_055333555.1, XP_055336590.1, XP_055336593.1, XP_055337120.1, XP_055337910.1, XP_055341323.1, XP_055344555.1, XP_055346101.1, XP_055346102.1, XP_055346104.1, XP_055350956.1	GAV09745.1
OG0000052			XP_055327414.1, XP_055328471.1, XP_055330179.1, XP_055330267.1, XP_055330933.1, XP_055331803.1, XP_055337325.1, XP_055337327.1, XP_055339291.1, XP_055340153.1, XP_055340775.1, XP_055340779.1, XP_055342315.1, XP_055343723.1, XP_055343823.1, XP_055343844.1, XP_055343845.1, XP_055343846.1, XP_055343927.1, XP_055344038.1, XP_055347082.1, XP_055347839.1, XP_055347840.1, XP_055347841.1, XP_055348198.1,…
OG0000053			XP_055330968.1, XP_055330969.1, XP_055330970.1, XP_055330971.1, XP_055330973.1, XP_055330974.1, XP_055330975.1, XP_055334661.1, XP_055334663.1, XP_055336850.1, XP_055336851.1, XP_055336864.1, XP_055336867.1, XP_055336925.1, XP_055336927.1, XP_055336928.1, XP_055336929.1, XP_055336930.1, XP_055336931.1, XP_055336932.1, XP_055336939.1, XP_055337013.1, XP_055337041.1, XP_055337042.1, XP_055337055.1,…
OG0000054	g1715.t1	OQV23048.1, OQV23049.1, OQV23050.1, OWA51540.1, OWA52208.1, OWA53115.1, OWA53116.1, OWA53117.1, OWA55523.1	XP_055328692.1, XP_055328780.1, XP_055328781.1, XP_055328945.1, XP_055328947.1, XP_055328948.1, XP_055328949.1, XP_055328950.1, XP_055329162.1, XP_055329163.1, XP_055329165.1, XP_055329166.1, XP_055329167.1, XP_055329250.1, XP_055329251.1, XP_055329388.1, XP_055329389.1, XP_055329390.1, XP_055332867.1, XP_055332868.1, XP_055332869.1, XP_055332870.1, XP_055332996.1, XP_055333069.1, XP_055336712.1,…	GAU90880.1, GAV01122.1, GAV03041.1, GAV06281.1, GAV06282.1
OG0000055			XP_055342557.1, XP_055344190.1, XP_055344191.1, XP_055344193.1, XP_055344194.1, XP_055344205.1, XP_055344206.1, XP_055344207.1, XP_055344208.1, XP_055344209.1, XP_055344211.1, XP_055344212.1, XP_055344213.1, XP_055344214.1, XP_055344215.1, XP_055344222.1, XP_055344241.1, XP_055344243.1, XP_055344247.1, XP_055344248.1, XP_055344249.1, XP_055344250.1, XP_055344251.1, XP_055344252.1, XP_055344254.1,…
OG0000056	g10258.t1, g10964.t1, g11863.t1, g11896.t1, g11897.t1, g11898.t1, g12430.t1, g13028.t1, g13104.t1, g13109.t1, g13130.t1, g13272.t1, g13274.t1, g13754.t1, g13948.t1, g13949.t1, g14650.t1, g14662.t1, g14711.t1, g15225.t1, g15743.t1, g1956.t1, g1994.t1, g232.t1, g234.t1, g2646.t1, g4146.t1, g4227.t1, g4351.t1, g4943.t1, g5213.t1, g5553.t1, g5641.t1, g5708.t1, g6579.t1, g6992.t1, g720.t1, g7424.t1, g…	OWA55352.1	XP_055328935.1, XP_055329378.1, XP_055338441.1, XP_055339180.1, XP_055344232.1, XP_055347372.1, XP_055348846.1, XP_055351306.1, XP_055351307.1, XP_055353689.1, XP_055353765.1, XP_055353927.1, XP_055354335.1, XP_055356884.1, XP_055357527.1	GAV09138.1
OG0000057	g10464.t1, g10498.t1, g10499.t1, g10534.t1, g11245.t1, g11246.t1, g11248.t1, g11248.t2, g12809.t1, g1292.t1, g13032.t1, g13033.t1, g13454.t1, g2833.t1, g3207.t1, g5763.t1, g6590.t1, g6591.t1, g6591.t2, g6592.t1, g6698.t1, g6698.t2, g6785.t1, g759.t1, g869.t1		XP_055328829.1, XP_055328936.1, XP_055329152.1, XP_055342086.1, XP_055342087.1, XP_055342088.1, XP_055342089.1, XP_055342090.1, XP_055342112.1, XP_055342122.1, XP_055342124.1, XP_055342125.1, XP_055342126.1, XP_055342181.1, XP_055342182.1, XP_055342183.1, XP_055342234.1, XP_055342238.1, XP_055342252.1, XP_055342262.1, XP_055345763.1, XP_055346839.1, XP_055346840.1, XP_055346857.1, XP_055347016.1,…
OG0000058			XP_055327333.1, XP_055330784.1, XP_055332499.1, XP_055336759.1, XP_055336760.1, XP_055345395.1, XP_055345396.1, XP_055345397.1, XP_055345398.1, XP_055345410.1, XP_055345411.1, XP_055345412.1, XP_055347007.1, XP_055347008.1, XP_055347009.1, XP_055347562.1, XP_055348480.1, XP_055350701.1, XP_055350702.1, XP_055350703.1, XP_055351937.1, XP_055351938.1, XP_055353299.1, XP_055354104.1, XP_055354147.1,…
OG0000059	g11015.t1, g11570.t1, g13046.t1, g13372.t1, g2459.t1, g2460.t1, g2461.t1, g2669.t1, g3513.t1, g4424.t1, g6228.t1, g6304.t1, g7293.t1, g8058.t1, g8537.t1	OQV11688.1, OQV12593.1, OQV12594.1, OQV13630.1, OQV14085.1, OQV17214.1, OQV17695.1, OQV17704.1, OQV17705.1, OQV17706.1, OQV17707.1, OQV17708.1, OQV17709.1, OQV17710.1, OQV17711.1, OQV17712.1, OQV17725.1, OQV17726.1, OQV17727.1, OQV17728.1, OQV17734.1, OQV17738.1, OQV17753.1, OQV22902.1, OQV22903.1, OQV22904.1, OQV25931.1, OQV26198.1, OWA50687.1, OWA50688.1, OWA53886.1	XP_055340552.1, XP_055340658.1, XP_055344090.1, XP_055344353.1, XP_055346192.1	GAU88079.1, GAU88959.1, GAU94916.1, GAU94917.1, GAU95053.1, GAU95087.1, GAV04775.1, GAV08291.1
OG0000060		OQV23992.1, OWA55044.1	XP_055328170.1, XP_055328490.1, XP_055330095.1, XP_055330096.1, XP_055330122.1, XP_055330202.1, XP_055333754.1, XP_055335010.1, XP_055335013.1, XP_055335014.1, XP_055335015.1, XP_055335017.1, XP_055335071.1, XP_055335072.1, XP_055335074.1, XP_055335075.1, XP_055335076.1, XP_055340254.1, XP_055340255.1, XP_055340371.1, XP_055340432.1, XP_055342329.1, XP_055342424.1, XP_055342425.1, XP_055342437.1,…
OG0000061			XP_055329927.1, XP_055329928.1, XP_055329931.1, XP_055329932.1, XP_055329933.1, XP_055329934.1, XP_055329935.1, XP_055329936.1, XP_055329937.1, XP_055329939.1, XP_055329943.1, XP_055329944.1, XP_055329983.1, XP_055329992.1, XP_055331147.1, XP_055331148.1, XP_055331149.1, XP_055331150.1, XP_055331151.1, XP_055336905.1, XP_055336907.1, XP_055336909.1, XP_055336910.1, XP_055341938.1, XP_055341943.1,…
OG0000062	g10378.t1, g11283.t1, g12203.t1, g12408.t1, g12813.t1, g12993.t1, g13078.t1, g13404.t1, g13412.t1, g13973.t1, g14265.t1, g14778.t1, g15556.t1, g15591.t1, g15592.t1, g2655.t1, g2827.t1, g2829.t1, g3246.t1, g3525.t1, g3813.t1, g4252.t1, g4255.t1, g4263.t1, g4266.t1, g4321.t1, g4322.t1, g4327.t1, g4580.t1, g4732.t1, g5274.t1, g5310.t1, g5555.t1, g5728.t1, g6119.t1, g6249.t1, g6265.t1, g6266.t1, g743…		XP_055354500.1	GAU97137.1, GAV00684.1, GAV00778.1
OG0000063	g11454.t1, g4018.t1, g4573.t1, g550.t1, g551.t1	OQV11451.1, OQV11452.1, OQV12178.1, OQV12179.1, OQV12180.1, OQV12181.1, OQV12182.1, OQV12401.1, OQV12402.1, OQV12516.1, OQV12703.1, OQV12704.1, OQV12705.1, OQV13699.1, OQV13700.1, OQV13701.1, OQV13703.1, OQV14497.1, OQV14498.1, OQV14499.1, OQV14508.1, OQV15294.1, OQV15756.1, OQV15811.1, OQV17323.1, OQV17383.1, OQV17616.1, OQV21562.1, OQV22584.1, OQV22585.1, OQV22586.1, OQV23357.1, OQV23364.1, OQV…	XP_055353490.1	GAU88891.1, GAU89635.1, GAU89636.1, GAV03732.1, GAV03733.1
OG0000064	g8857.t1, g8857.t2	OQV14747.1, OQV14757.1, OQV14758.1, OQV21347.1, OQV21350.1, OQV21351.1, OQV21353.1, OWA51124.1, OWA51132.1, OWA51133.1, OWA51134.1, OWA51135.1, OWA51143.1, OWA51144.1, OWA51145.1, OWA51146.1, OWA51147.1, OWA51148.1, OWA52586.1, OWA52899.1, OWA52905.1, OWA52906.1, OWA52910.1, OWA52911.1, OWA52913.1, OWA52915.1, OWA52916.1, OWA52918.1, OWA53181.1, OWA53182.1, OWA53186.1, OWA53188.1, OWA53190.1, OWA…	XP_055343677.1, XP_055357400.1, XP_055357401.1, XP_055357402.1	GAU94757.1, GAU94758.1
OG0000065	g3120.t1		XP_055330061.1, XP_055337118.1, XP_055337719.1, XP_055337720.1, XP_055339267.1, XP_055340220.1, XP_055340297.1, XP_055340341.1, XP_055340361.1, XP_055340362.1, XP_055340363.1, XP_055340364.1, XP_055340365.1, XP_055340412.1, XP_055340413.1, XP_055340425.1, XP_055340426.1, XP_055340483.1, XP_055340484.1, XP_055340499.1, XP_055340502.1, XP_055340515.1, XP_055340535.1, XP_055342540.1, XP_055342541.1,…
OG0000066			XP_055327295.1, XP_055327873.1, XP_055332076.1, XP_055335715.1, XP_055340290.1, XP_055341940.1, XP_055343081.1, XP_055346005.1, XP_055346756.1, XP_055346757.1, XP_055346758.1, XP_055346759.1, XP_055346798.1, XP_055346800.1, XP_055346801.1, XP_055346802.1, XP_055347610.1, XP_055348047.1, XP_055349051.1, XP_055349127.1, XP_055349199.1, XP_055349265.1, XP_055349266.1, XP_055349280.1, XP_055349353.1,…
OG0000067	g11146.t1, g11665.t1, g11871.t1, g11886.t1, g12.t1, g1227.t1, g1227.t2, g1227.t3, g12310.t1, g12727.t1, g12728.t1, g13.t1, g13111.t1, g13111.t2, g13292.t1, g13434.t1, g13671.t1, g14616.t1, g15511.t1, g1821.t1, g1825.t1, g2221.t1, g2223.t1, g2861.t1, g3002.t1, g3948.t1, g3951.t1, g4249.t1, g4532.t1, g4533.t1, g4627.t1, g4733.t1, g4733.t2, g4735.t1, g5215.t1, g5689.t1, g5965.t1, g5968.t1, g5969.t1,…			GAV00678.1, GAV00679.1, GAV00680.1
OG0000068	g10052.t1, g10053.t1, g10129.t1, g11773.t1, g12536.t1, g1385.t1, g1387.t1, g13956.t1, g14805.t1, g14811.t1, g15086.t1, g15313.t1, g15314.t1, g15315.t1, g15658.t1, g2097.t1, g2323.t1, g2643.t1, g2898.t1, g3178.t1, g3178.t2, g3815.t1, g5692.t1, g6018.t1, g6498.t1, g7195.t1, g8978.t1, g9937.t1	OQV16755.1, OQV23706.1, OQV26027.1, OQV26028.1	XP_055339086.1, XP_055343688.1, XP_055344618.1	GAU87712.1, GAU87713.1, GAU89151.1, GAU91821.1, GAU91822.1, GAU92179.1, GAV01196.1, GAV01197.1, GAV01480.1, GAV01560.1, GAV01561.1, GAV01562.1, GAV01612.1, GAV01618.1, GAV04559.1, GAV04560.1, GAV05116.1, GAV05117.1, GAV06306.1, GAV06307.1
OG0000069	g10096.t1, g10909.t1, g11220.t1, g11807.t1, g11931.t1, g11939.t1, g11940.t1, g13305.t1, g13309.t1, g13310.t1, g13311.t1, g13493.t1, g13502.t1, g13639.t1, g13669.t1, g13969.t1, g13970.t1, g14343.t1, g14343.t2, g14572.t1, g14945.t1, g14948.t1, g15298.t1, g1763.t1, g2335.t1, g2337.t1, g2339.t1, g2344.t1, g2345.t1, g2346.t1, g2347.t1, g2348.t1, g2349.t1, g2350.t1, g26.t1, g3354.t1, g3393.t1, g390.t1,…	OQV24714.1, OQV24715.1, OWA49900.1, OWA49901.1
OG0000070	g10507.t1, g10511.t1, g10524.t1, g185.t1, g5773.t1, g6169.t1	OQV11686.1, OQV12598.1, OQV12599.1, OQV12600.1, OQV12601.1, OQV12602.1, OQV12603.1, OQV12735.1, OQV12736.1, OQV14159.1, OQV17085.1, OQV17978.1, OQV20994.1, OQV24194.1, OWA50056.1, OWA50870.1, OWA51108.1	XP_055330537.1, XP_055330538.1, XP_055330539.1, XP_055330540.1, XP_055330541.1, XP_055330542.1, XP_055330810.1, XP_055333797.1, XP_055333862.1, XP_055333872.1, XP_055333914.1, XP_055333957.1, XP_055334069.1, XP_055334070.1, XP_055334071.1, XP_055334073.1, XP_055334079.1, XP_055334080.1, XP_055344037.1, XP_055344666.1, XP_055344667.1, XP_055344668.1, XP_055345136.1, XP_055350723.1, XP_055353984.1,…	GAV02926.1
OG0000071				GAU87434.1, GAU89191.1, GAU89215.1, GAU89233.1, GAU89384.1, GAU89824.1, GAU89826.1, GAU90920.1, GAU91976.1, GAU92625.1, GAU92677.1, GAU92792.1, GAU93529.1, GAU93530.1, GAU93531.1, GAU93653.1, GAU93654.1, GAU94657.1, GAU94885.1, GAU94886.1, GAU95171.1, GAU95172.1, GAU95468.1, GAU95693.1, GAU96109.1, GAU96110.1, GAU96837.1, GAU96838.1, GAU96895.1, GAU97303.1, GAU97477.1, GAV00637.1, GAV00757.1, GAV…
OG0000072		OQV11980.1, OQV12166.1, OQV12441.1, OQV13733.1, OQV13967.1, OQV14201.1, OQV14325.1, OQV14326.1, OQV14456.1, OQV14516.1, OQV14613.1, OQV14997.1, OQV15058.1, OQV15059.1, OQV16148.1, OQV17206.1, OQV17645.1, OQV18044.1, OQV18859.1, OQV18860.1, OQV20031.1, OQV20678.1, OQV20770.1, OQV22168.1, OQV22712.1, OQV23025.1, OQV24192.1, OQV24836.1, OWA50170.1, OWA50512.1, OWA50819.1, OWA50868.1, OWA51566.1, OWA…
OG0000073			XP_055338503.1, XP_055338523.1, XP_055338548.1, XP_055338549.1, XP_055338578.1, XP_055338579.1, XP_055338584.1, XP_055338592.1, XP_055338608.1, XP_055341006.1, XP_055345084.1, XP_055345183.1, XP_055345184.1, XP_055345691.1, XP_055345701.1, XP_055345711.1, XP_055347595.1, XP_055347596.1, XP_055347597.1, XP_055348718.1, XP_055349732.1, XP_055349748.1, XP_055349749.1, XP_055349811.1, XP_055349835.1,…
OG0000074	g10522.t1, g11071.t1, g11249.t1, g11553.t1, g11554.t1, g11599.t1, g11599.t2, g11601.t1, g11868.t1, g11869.t1, g12268.t1, g1293.t1, g1300.t1, g13036.t1, g13456.t1, g13460.t1, g13461.t1, g14480.t1, g14573.t1, g14659.t1, g1466.t1, g14661.t1, g14802.t1, g14921.t1, g15240.t1, g15378.t1, g15379.t1, g15496.t1, g15661.t1, g1600.t1, g2273.t1, g2338.t1, g298.t1, g3780.t1, g459.t1, g5227.t1, g5232.t1, g5233…		XP_055347141.1
OG0000075	g12534.t1, g1808.t1, g4578.t1, g4884.t1, g5366.t1, g8041.t1	OQV12854.1, OQV12855.1, OQV12856.1, OQV16081.1, OQV16082.1, OQV16083.1, OQV16084.1, OQV16086.1, OQV16087.1, OQV16869.1, OQV16872.1, OQV16873.1, OQV17434.1, OQV17435.1, OQV17436.1, OQV17437.1, OQV17438.1, OQV22533.1, OQV22860.1, OQV22873.1, OQV22977.1, OQV22978.1, OQV22986.1, OQV22988.1, OQV23040.1, OWA50097.1, OWA50098.1, OWA50099.1, OWA51966.1, OWA52565.1, OWA52865.1, OWA52866.1, OWA52867.1, OWA…	XP_055332315.1, XP_055332394.1, XP_055336541.1, XP_055336648.1, XP_055336679.1, XP_055354210.1, XP_055354232.1, XP_055354234.1, XP_055354245.1	GAU87300.1, GAU97055.1, GAU97057.1
OG0000076	g1091.t1, g15490.t1, g2730.t1, g2730.t2, g2892.t1, g2995.t1, g3025.t1, g509.t1, g518.t1, g519.t1, g5247.t1, g6514.t1, g7458.t1, g7712.t1	OQV12324.1, OQV13209.1, OQV13210.1, OQV13211.1, OQV13247.1, OQV18430.1, OQV19440.1, OQV19441.1, OQV19442.1, OQV19443.1, OQV20666.1, OQV20683.1, OWA51270.1, OWA53811.1, OWA53995.1, OWA53996.1, OWA55500.1	XP_055334974.1, XP_055336369.1, XP_055337767.1, XP_055337916.1, XP_055339250.1, XP_055340931.1, XP_055341430.1, XP_055342628.1, XP_055343838.1, XP_055344936.1, XP_055344945.1, XP_055344946.1, XP_055345386.1, XP_055350334.1, XP_055352325.1, XP_055352950.1, XP_055355346.1, XP_055355919.1, XP_055356150.1	GAU90670.1, GAU90711.1, GAV01649.1
OG0000077			XP_055333201.1, XP_055334117.1, XP_055334118.1, XP_055334120.1, XP_055334121.1, XP_055334122.1, XP_055334123.1, XP_055334132.1, XP_055334202.1, XP_055334226.1, XP_055334231.1, XP_055334236.1, XP_055334237.1, XP_055334238.1, XP_055334239.1, XP_055334269.1, XP_055334270.1, XP_055334295.1, XP_055334296.1, XP_055334302.1, XP_055334307.1, XP_055334308.1, XP_055334309.1, XP_055334310.1, XP_055334317.1,…
OG0000078			XP_055328118.1, XP_055330138.1, XP_055330290.1, XP_055330596.1, XP_055330712.1, XP_055332513.1, XP_055333936.1, XP_055335045.1, XP_055335046.1, XP_055338512.1, XP_055339254.1, XP_055339255.1, XP_055339256.1, XP_055339265.1, XP_055339274.1, XP_055342014.1, XP_055342015.1, XP_055342018.1, XP_055342055.1, XP_055343055.1, XP_055343056.1, XP_055343057.1, XP_055343058.1, XP_055343059.1, XP_055343060.1,…
OG0000079	g10537.t1, g11195.t1, g11646.t1, g11647.t1, g11768.t1, g12509.t1, g1303.t1, g14293.t1, g14453.t1, g14562.t1, g14757.t1, g14758.t1, g14797.t1, g14857.t1, g14909.t1, g15257.t1, g1530.t1, g15588.t1, g15773.t1, g15774.t1, g15776.t1, g2218.t1, g2471.t1, g2677.t1, g2679.t1, g2761.t1, g2818.t1, g3071.t1, g3233.t1, g3233.t2, g3275.t1, g3456.t1, g3527.t1, g3628.t1, g4173.t1, g4800.t1, g4940.t1, g5283.t1, …	OQV14583.1, OWA51776.1, OWA53030.1, OWA53521.1
OG0000080			XP_055329619.1, XP_055329896.1, XP_055329897.1, XP_055330375.1, XP_055330407.1, XP_055330432.1, XP_055330433.1, XP_055332506.1, XP_055332543.1, XP_055333986.1, XP_055334047.1, XP_055335868.1, XP_055340296.1, XP_055341791.1, XP_055345222.1, XP_055345224.1, XP_055345258.1, XP_055345259.1, XP_055345279.1, XP_055345281.1, XP_055345282.1, XP_055348883.1, XP_055350614.1, XP_055350616.1, XP_055350637.1,…
OG0000081			XP_055332764.1, XP_055332765.1, XP_055332766.1, XP_055332767.1, XP_055338504.1, XP_055339259.1, XP_055339260.1, XP_055339261.1, XP_055339264.1, XP_055339273.1, XP_055339277.1, XP_055339313.1, XP_055339324.1, XP_055339334.1, XP_055339356.1, XP_055339357.1, XP_055339358.1, XP_055339361.1, XP_055339377.1, XP_055339379.1, XP_055339384.1, XP_055339385.1, XP_055339387.1, XP_055339388.1, XP_055339392.1,…
OG0000082	g11392.t1	OQV11584.1, OQV11598.1, OQV11610.1, OQV11612.1, OQV11616.1, OQV11618.1, OQV13541.1, OQV13542.1, OQV15409.1, OQV19428.1, OQV19429.1, OQV19430.1, OQV19434.1, OQV23381.1, OQV23385.1, OQV23986.1, OQV23993.1, OWA50388.1, OWA50389.1, OWA50390.1, OWA50391.1, OWA50469.1, OWA50500.1, OWA51414.1, OWA51415.1, OWA51416.1, OWA52411.1, OWA53517.1, OWA53520.1, OWA53522.1, OWA53523.1, OWA53748.1, OWA54188.1, OWA…	XP_055353904.1
OG0000083	g5315.t1	OQV12546.1, OQV12893.1, OQV13196.1, OQV13477.1, OQV13478.1, OQV13481.1, OQV13903.1, OQV13904.1, OQV14798.1, OQV17621.1, OQV18946.1, OQV19246.1, OQV19718.1, OQV19857.1, OQV19962.1, OQV20342.1, OQV20875.1, OQV20969.1, OQV21683.1, OQV22898.1, OQV22927.1, OQV23375.1, OQV23452.1, OQV24905.1, OWA50832.1, OWA50833.1, OWA52071.1, OWA52172.1, OWA53559.1, OWA53848.1, OWA54076.1, OWA54077.1, OWA54079.1, OWA…	XP_055343395.1, XP_055347389.1, XP_055353290.1	GAV07177.1
OG0000084	g13413.t1, g13414.t1, g14708.t1, g3015.t1, g3016.t1, g5737.t1, g5739.t1, g9310.t1	OQV15026.1, OQV15027.1, OQV15030.1, OQV15031.1, OQV15032.1, OQV15034.1, OQV15035.1, OQV15036.1, OQV15040.1, OQV15041.1, OQV15053.1, OQV15055.1, OQV18224.1, OWA50939.1, OWA50944.1, OWA50945.1, OWA50946.1, OWA50948.1, OWA50949.1, OWA50950.1, OWA50957.1, OWA50961.1, OWA53755.1, OWA53756.1, OWA53758.1, OWA53759.1, OWA53760.1, OWA53762.1, OWA53765.1, OWA53767.1, OWA55312.1, OWA55576.1, OWA55725.1, OWA…	XP_055337821.1, XP_055337822.1, XP_055337960.1, XP_055345156.1, XP_055352025.1, XP_055352026.1, XP_055352027.1, XP_055352028.1
OG0000085	g1092.t1, g1093.t1, g2729.t1, g2891.t1, g2996.t1, g3024.t1, g4984.t1, g510.t1, g520.t1, g5248.t1, g5278.t1, g6512.t1, g6513.t1, g7711.t1, g8702.t1		XP_055329872.1, XP_055330499.1, XP_055330505.1, XP_055334067.1, XP_055336281.1, XP_055336861.1, XP_055337791.1, XP_055338424.1, XP_055339083.1, XP_055339094.1, XP_055339280.1, XP_055340508.1, XP_055340853.1, XP_055342579.1, XP_055342629.1, XP_055344937.1, XP_055345063.1, XP_055345166.1, XP_055345255.1, XP_055345369.1, XP_055345379.1, XP_055345578.1, XP_055347729.1, XP_055350101.1, XP_055350333.1,…	GAU89452.1
OG0000086	g12299.t1, g1315.t1, g1316.t1, g3142.t1, g3142.t2, g4571.t1, g6743.t1, g6748.t1	OQV11471.1, OQV11549.1, OQV11550.1, OQV11566.1, OQV11567.1, OQV11568.1, OQV11572.1, OQV11714.1, OQV12926.1, OQV13506.1, OQV13507.1, OQV14884.1, OQV14886.1, OQV16926.1, OWA50359.1, OWA50367.1, OWA50368.1, OWA50369.1, OWA50372.1, OWA51422.1, OWA51423.1, OWA52526.1, OWA52527.1, OWA52533.1, OWA52534.1, OWA52557.1, OWA53077.1, OWA53177.1, OWA53965.1, OWA54473.1		GAU87568.1, GAU87569.1, GAU87570.1, GAU89365.1, GAU90440.1, GAU90441.1, GAU90471.1, GAU90472.1, GAU90473.1, GAU90565.1, GAV01677.1
OG0000087		OQV12056.1, OQV12723.1, OQV18009.1, OQV20616.1, OQV20617.1, OQV20618.1, OQV20619.1, OQV20620.1, OQV20621.1, OQV20622.1, OQV20623.1, OQV20627.1, OQV23345.1, OWA50194.1, OWA50195.1, OWA50196.1, OWA50197.1, OWA50198.1, OWA50200.1, OWA52885.1, OWA53140.1, OWA53141.1, OWA53555.1, OWA53556.1, OWA53557.1, OWA53558.1, OWA53654.1, OWA53656.1, OWA53854.1, OWA53855.1, OWA54217.1, OWA54218.1, OWA54219.1, OWA…		GAU94748.1, GAV08339.1
OG0000088	g10394.t1, g11386.t1, g1250.t1, g12891.t1, g13060.t1, g14663.t1, g2327.t1, g2328.t1, g3013.t1, g306.t1, g3159.t1, g3179.t1, g3588.t1, g522.t1, g5658.t1, g5659.t1, g6811.t1, g6905.t1, g7207.t1, g7813.t1, g7870.t1, g833.t1, g8619.t1, g9276.t1, g9277.t1	OQV12409.1, OQV12410.1, OWA50761.1, OWA50762.1, OWA50763.1	XP_055346208.1, XP_055346504.1, XP_055346518.1, XP_055352754.1, XP_055352763.1, XP_055352768.1, XP_055352776.1, XP_055352786.1, XP_055352797.1	GAU88412.1, GAU88413.1, GAU88414.1, GAU91888.1, GAU91889.1, GAU91890.1, GAU91891.1, GAU91896.1, GAU97309.1
OG0000089	g11258.t1, g11361.t1, g11864.t1, g12566.t1, g12581.t1, g12835.t1, g12887.t1, g13173.t1, g13387.t1, g13417.t1, g13575.t1, g13683.t1, g1383.t1, g14091.t1, g14098.t1, g14337.t1, g14669.t1, g14871.t1, g15659.t1, g1577.t1, g2211.t1, g2321.t1, g2341.t1, g25.t1, g2817.t1, g366.t1, g3914.t1, g392.t1, g4850.t1, g4932.t1, g4966.t1, g5241.t1, g5268.t1, g57.t1, g6257.t1, g6308.t1, g636.t1, g638.t1, g721.t1, …	OWA53549.1		GAU92511.1
OG0000090	g13213.t1	OQV11458.1, OQV11480.1, OQV12161.1, OQV12164.1, OQV12165.1, OQV12167.1, OQV12168.1, OQV13577.1, OQV13578.1, OQV13579.1, OQV13580.1, OQV13581.1, OQV13693.1, OQV13695.1, OQV13696.1, OQV13697.1, OQV13698.1, OQV13706.1, OQV13707.1, OQV13713.1, OQV13714.1, OQV13715.1, OQV13716.1, OQV13717.1, OQV13718.1, OQV14360.1, OQV15341.1, OQV19641.1, OQV19649.1, OQV24134.1, OWA52746.1, OWA52753.1, OWA53260.1, OWA…		GAU87189.1, GAU87674.1
OG0000091	g10116.t1, g10264.t1, g10532.t1, g11067.t1, g11207.t1, g11759.t1, g11831.t1, g11860.t1, g11925.t1, g1209.t1, g122.t1, g12384.t1, g12511.t1, g12812.t1, g13073.t1, g13426.t1, g1347.t1, g13708.t1, g14936.t1, g15392.t1, g15499.t1, g15500.t1, g15501.t1, g15552.t1, g15554.t1, g15555.t1, g1758.t1, g1914.t1, g2676.t1, g2789.t1, g3399.t1, g3993.t1, g4567.t1, g4730.t1, g4963.t1, g690.t1, g691.t1, g692.t1, …
OG0000092	g11412.t1	OQV11659.1, OQV12055.1, OQV12057.1, OQV12416.1, OQV12419.1, OQV12423.1, OQV12424.1, OQV12431.1, OQV12936.1, OQV18144.1, OQV18146.1, OQV20011.1, OQV20012.1, OQV21357.1, OQV21358.1, OQV22718.1, OQV22719.1, OQV23811.1, OQV24130.1, OQV24817.1, OWA51022.1, OWA51025.1, OWA51026.1, OWA51027.1, OWA51028.1, OWA51029.1, OWA51189.1, OWA51191.1, OWA51421.1, OWA52483.1, OWA52484.1, OWA52568.1, OWA54471.1, OWA…	XP_055334074.1, XP_055334076.1, XP_055349334.1, XP_055350629.1	GAU89537.1, GAU90862.1, GAU90863.1, GAV01333.1, GAV01334.1, GAV01337.1
OG0000093			XP_055328875.1, XP_055328907.1, XP_055332409.1, XP_055332411.1, XP_055332412.1, XP_055332413.1, XP_055332585.1, XP_055332586.1, XP_055332587.1, XP_055338603.1, XP_055341094.1, XP_055341095.1, XP_055341096.1, XP_055341097.1, XP_055342237.1, XP_055343137.1, XP_055343138.1, XP_055345244.1, XP_055346180.1, XP_055346181.1, XP_055346182.1, XP_055346183.1, XP_055346250.1, XP_055346251.1, XP_055348821.1,…
OG0000094			XP_055331127.1, XP_055331128.1, XP_055331129.1, XP_055336813.1, XP_055336974.1, XP_055337005.1, XP_055337007.1, XP_055337008.1, XP_055337009.1, XP_055337010.1, XP_055337045.1, XP_055343337.1, XP_055343338.1, XP_055343339.1, XP_055343340.1, XP_055343341.1, XP_055343342.1, XP_055344715.1, XP_055344716.1, XP_055347165.1, XP_055347166.1, XP_055347167.1, XP_055347168.1, XP_055347169.1, XP_055347170.1,…
OG0000095	g11872.t1, g11873.t1, g12286.t1, g12320.t1, g125.t1, g1288.t1, g13023.t1, g13411.t1, g15243.t1, g15443.t1, g15447.t1, g1935.t1, g3390.t1, g5045.t1, g5698.t1, g931.t1, g9825.t1	OWA52370.1, OWA52609.1, OWA53142.1, OWA53438.1, OWA53439.1, OWA53761.1, OWA54452.1, OWA54934.1	XP_055328312.1, XP_055329866.1, XP_055330395.1, XP_055332306.1, XP_055335734.1, XP_055337902.1, XP_055339092.1, XP_055344391.1, XP_055344929.1, XP_055345168.1, XP_055345784.1, XP_055349959.1, XP_055350942.1, XP_055353478.1, XP_055353612.1, XP_055354004.1, XP_055354019.1, XP_055354193.1, XP_055355334.1	GAU97495.1, GAV03753.1
OG0000096		OQV12342.1, OQV12343.1, OQV12344.1, OQV12549.1, OQV12550.1, OQV12551.1, OQV12555.1, OQV13598.1, OQV13771.1, OQV13772.1, OQV14511.1, OQV14512.1, OQV14513.1, OQV14514.1, OQV16011.1, OQV16103.1, OQV17198.1, OQV17288.1, OQV17290.1, OQV17320.1, OQV17731.1, OQV18902.1, OQV20906.1, OQV23344.1, OWA49910.1, OWA49911.1, OWA49938.1, OWA49939.1, OWA51254.1, OWA51263.1, OWA51264.1, OWA51265.1, OWA51266.1, OWA…
OG0000097		OQV12528.1, OQV12529.1, OQV12879.1, OQV13376.1, OQV13377.1, OQV13379.1, OQV13380.1, OQV13381.1, OQV14493.1, OQV14494.1, OQV14495.1, OQV14496.1, OQV16127.1, OQV16129.1, OQV16139.1, OQV16144.1, OQV20594.1, OQV20598.1, OQV20600.1, OQV20611.1, OQV20612.1, OQV20636.1, OQV20643.1, OQV21893.1, OQV23053.1, OQV24934.1, OQV24935.1, OQV24948.1, OQV24949.1, OWA49805.1, OWA51857.1, OWA51859.1, OWA51861.1, OWA…
OG0000098			XP_055332144.1, XP_055332218.1, XP_055332291.1, XP_055332361.1, XP_055332437.1, XP_055342567.1, XP_055342624.1, XP_055342679.1, XP_055345261.1, XP_055347213.1, XP_055347214.1, XP_055347253.1, XP_055347254.1, XP_055347256.1, XP_055347257.1, XP_055347267.1, XP_055347270.1, XP_055347271.1, XP_055347272.1, XP_055347280.1, XP_055347281.1, XP_055347282.1, XP_055347285.1, XP_055347286.1, XP_055347287.1,…
OG0000099	g10404.t1, g1066.t1, g10914.t1, g11866.t1, g11874.t1, g1286.t1, g1287.t1, g13022.t1, g15149.t1, g15242.t1, g1937.t1, g289.t1, g3391.t1, g503.t1, g5699.t1, g8025.t1, g932.t1, g9826.t1	OWA54933.1	XP_055328424.1, XP_055330271.1, XP_055335738.1, XP_055337903.1, XP_055345768.1, XP_055346824.1, XP_055346825.1, XP_055346887.1, XP_055349958.1, XP_055357392.1, XP_055357577.1	GAU90671.1, GAU90714.1, GAU91676.1, GAU91677.1, GAU99940.1, GAV00861.1, GAV02772.1, GAV06389.1, GAV06504.1, GAV06656.1, GAV09983.1, GAV09984.1, GAV09985.1, GAV10015.1, GAV10057.1
OG0000100		OQV14078.1, OQV14578.1, OQV14586.1, OQV14589.1, OQV14590.1, OQV15595.1, OQV15596.1, OQV15597.1, OQV15598.1, OQV15599.1, OQV16335.1, OQV16337.1, OQV16341.1, OQV16342.1, OQV16343.1, OQV16344.1, OQV16562.1, OQV17291.1, OQV17292.1, OQV17293.1, OQV17294.1, OQV17296.1, OQV19715.1, OQV19716.1, OQV19717.1, OWA51087.1, OWA53924.1, OWA53925.1, OWA53928.1, OWA55301.1, OWA55741.1	XP_055333873.1, XP_055350045.1, XP_055355071.1	GAU95181.1, GAU95182.1, GAU95183.1, GAU95185.1, GAU95186.1, GAU95187.1, GAU95188.1, GAU95189.1, GAU95190.1, GAU95191.1, GAV08707.1
OG0000101	g13686.t1, g15664.t1, g1767.t1, g2866.t1, g2867.t1, g3855.t1, g4226.t1, g4873.t1, g4879.t1, g6248.t1, g6798.t1, g8291.t1, g8543.t1	OQV12652.1, OQV12653.1, OQV14540.1, OQV19536.1, OQV19537.1, OQV19539.1, OQV22541.1, OWA51943.1	XP_055338173.1, XP_055341054.1, XP_055341055.1, XP_055341068.1, XP_055341069.1, XP_055344412.1, XP_055344471.1, XP_055344472.1, XP_055352536.1, XP_055352547.1, XP_055352548.1, XP_055352552.1, XP_055352559.1, XP_055352561.1, XP_055352564.1, XP_055354055.1, XP_055354066.1	GAU87469.1, GAU89481.1, GAU91740.1, GAU91996.1, GAV06133.1, GAV06134.1, GAV06135.1
OG0000102	g14248.t1	OQV23002.1, OWA50458.1, OWA54655.1	XP_055330076.1, XP_055344565.1, XP_055350100.1, XP_055352505.1, XP_055353546.1, XP_055356364.1	GAU88007.1, GAU89502.1, GAU89503.1, GAU89796.1, GAU91049.1, GAU91336.1, GAU91337.1, GAU91422.1, GAU91598.1, GAU92276.1, GAU94856.1, GAU95250.1, GAU99164.1, GAU99609.1, GAU99914.1, GAU99995.1, GAV00746.1, GAV00755.1, GAV02648.1, GAV02766.1, GAV03389.1, GAV03392.1, GAV03617.1, GAV05590.1, GAV05591.1, GAV07075.1, GAV08223.1, GAV09579.1, GAV09738.1, GAV10056.1, GAV10068.1, GAV10076.1, GAV10077.1, GAV…
OG0000103	g9131.t1	OQV23817.1, OQV23822.1		GAU87437.1, GAU87438.1, GAU89192.1, GAU89219.1, GAU89382.1, GAU89383.1, GAU89461.1, GAU89825.1, GAU89827.1, GAU89828.1, GAU89829.1, GAU90220.1, GAU91977.1, GAU91978.1, GAU91979.1, GAU92626.1, GAU92627.1, GAU92676.1, GAU93652.1, GAU94655.1, GAU94656.1, GAU94873.1, GAU94874.1, GAU96839.1, GAU96840.1, GAU96841.1, GAU96893.1, GAV00635.1, GAV00636.1, GAV00758.1, GAV00759.1, GAV03402.1, GAV05808.1, GAV…
OG0000104	g12544.t1		XP_055329711.1, XP_055329739.1, XP_055329774.1, XP_055329775.1, XP_055329776.1, XP_055329777.1, XP_055329784.1, XP_055330328.1, XP_055340222.1, XP_055340223.1, XP_055340234.1, XP_055340235.1, XP_055340236.1, XP_055340306.1, XP_055340307.1, XP_055344728.1, XP_055344729.1, XP_055344818.1, XP_055344819.1, XP_055344821.1, XP_055344822.1, XP_055344967.1, XP_055344968.1, XP_055345225.1, XP_055345248.1,…	GAV07291.1
OG0000105		OWA50913.1	XP_055338520.1, XP_055348241.1	GAU87527.1, GAU87676.1, GAU87678.1, GAU89307.1, GAU89363.1, GAU89663.1, GAU89664.1, GAU90760.1, GAU91650.1, GAU91652.1, GAU91653.1, GAU91654.1, GAU91655.1, GAU91656.1, GAU91657.1, GAU91884.1, GAU91885.1, GAU91886.1, GAU91887.1, GAU92123.1, GAU92124.1, GAU92125.1, GAU92126.1, GAU92127.1, GAU92984.1, GAV00577.1, GAV00579.1, GAV00580.1, GAV01431.1, GAV04504.1, GAV04651.1, GAV04652.1, GAV04653.1, GAV…
OG0000106			XP_055336966.1, XP_055336967.1, XP_055336968.1, XP_055336969.1, XP_055336970.1, XP_055340219.1, XP_055342348.1, XP_055342366.1, XP_055342367.1, XP_055342368.1, XP_055342369.1, XP_055342370.1, XP_055342371.1, XP_055342393.1, XP_055342464.1, XP_055342522.1, XP_055342523.1, XP_055342524.1, XP_055342525.1, XP_055342526.1, XP_055342527.1, XP_055342528.1, XP_055347109.1, XP_055347110.1, XP_055347112.1,…
OG0000107	g10152.t1, g11109.t1, g11111.t1, g11112.t1, g11113.t1, g1200.t1, g12199.t1, g12200.t1, g12415.t1, g12561.t1, g12883.t1, g12884.t1, g13301.t1, g13478.t1, g13481.t1, g13501.t1, g1375.t1, g13784.t1, g14393.t1, g15520.t1, g15521.t1, g2272.t1, g3161.t1, g4272.t1, g6778.t1, g7212.t1, g7214.t1, g7215.t1, g7216.t1, g7218.t1, g7222.t1, g811.t1, g8672.t1, g8674.t1, g8811.t1, g8812.t1, g8813.t1, g8988.t1, g…			GAU87228.1, GAV04858.1
OG0000108	g3149.t1	OQV11533.1, OQV12558.1, OQV12561.1, OQV12886.1, OQV12887.1, OQV12888.1, OQV12889.1, OQV13884.1, OQV15340.1, OQV16222.1, OQV16648.1, OQV18226.1, OQV19455.1, OQV20895.1, OQV21794.1, OQV21796.1, OQV22035.1, OQV22981.1, OQV22989.1, OQV23435.1, OQV24085.1, OQV24202.1, OQV24544.1, OQV25563.1, OWA50299.1, OWA50540.1, OWA51665.1, OWA52703.1, OWA53606.1, OWA54010.1, OWA54104.1, OWA54412.1, OWA54904.1, OWA…	XP_055345777.1, XP_055345778.1, XP_055345779.1, XP_055345780.1, XP_055345997.1	GAU91969.1, GAU91970.1, GAU92877.1, GAU99885.1
OG0000109	g5132.t1	OQV11449.1, OQV12426.1, OQV13487.1, OQV16094.1, OQV16095.1, OQV16457.1, OQV17213.1, OQV17390.1, OQV19963.1, OQV23060.1, OQV24163.1, OWA50639.1, OWA50818.1, OWA50820.1, OWA50827.1, OWA50964.1, OWA51128.1, OWA51129.1, OWA51296.1, OWA51297.1, OWA51298.1, OWA52373.1, OWA52376.1, OWA52988.1, OWA52990.1, OWA52991.1, OWA53210.1, OWA53293.1, OWA53294.1, OWA53296.1, OWA54126.1, OWA54679.1, OWA54685.1, OWA…	XP_055338607.1, XP_055349251.1	GAU96258.1, GAV00892.1, GAV03004.1, GAV06518.1
OG0000110	g10489.t1, g1304.t1, g14059.t1, g14336.t1, g15662.t1, g3114.t1, g3614.t1, g6305.t1, g6585.t1, g699.t1	OQV12337.1, OQV12338.1, OQV12340.1, OQV12341.1, OWA50189.1, OWA50229.1, OWA50681.1, OWA51276.1, OWA52105.1, OWA52106.1, OWA52107.1, OWA52108.1, OWA52109.1, OWA52110.1, OWA54308.1, OWA54608.1, OWA54611.1, OWA54612.1, OWA54664.1, OWA54784.1, OWA54836.1, OWA54837.1, OWA54838.1, OWA54839.1, OWA54919.1, OWA54920.1, OWA54921.1, OWA54922.1, OWA55393.1, OWA55494.1, OWA55543.1	XP_055357694.1	GAV06355.1
OG0000111	g8994.t1	OQV13588.1, OQV17368.1, OQV20771.1, OQV21917.1, OQV25841.1	XP_055328595.1, XP_055329947.1, XP_055330817.1, XP_055337089.1, XP_055339050.1, XP_055339051.1, XP_055339052.1, XP_055339053.1, XP_055339055.1, XP_055339056.1, XP_055339057.1, XP_055341435.1, XP_055343134.1, XP_055345680.1, XP_055345959.1, XP_055345960.1, XP_055347205.1, XP_055347500.1, XP_055347966.1, XP_055347967.1, XP_055348003.1, XP_055348359.1, XP_055348698.1, XP_055349888.1, XP_055350379.1,…	GAU90596.1, GAU92374.1, GAV00458.1
OG0000112	g15441.t1, g2080.t1, g2081.t1, g2082.t1, g467.t1, g468.t1		XP_055333929.1, XP_055333930.1, XP_055335054.1, XP_055343018.1, XP_055351459.1, XP_055351476.1, XP_055356941.1	GAU87260.1, GAU87261.1, GAU89202.1, GAU89203.1, GAU89572.1, GAU89855.1, GAU90134.1, GAU90144.1, GAU91509.1, GAU91989.1, GAU91990.1, GAU91991.1, GAU92141.1, GAU92142.1, GAU96370.1, GAU96371.1, GAU97635.1, GAU99356.1, GAV01171.1, GAV01172.1, GAV01181.1, GAV01182.1, GAV01183.1, GAV06575.1, GAV08299.1, GAV08300.1, GAV08301.1, GAV08886.1, GAV08887.1, GAV08888.1
OG0000113			XP_055330064.1, XP_055330065.1, XP_055330364.1, XP_055330365.1, XP_055330366.1, XP_055335970.1, XP_055344614.1, XP_055344615.1, XP_055344617.1, XP_055353084.1, XP_055353105.1, XP_055353106.1, XP_055353108.1, XP_055353109.1, XP_055354965.1, XP_055354966.1, XP_055355361.1, XP_055355362.1, XP_055355363.1, XP_055355364.1, XP_055355365.1, XP_055355366.1, XP_055355367.1, XP_055355368.1, XP_055355369.1,…
OG0000114			XP_055335051.1, XP_055335052.1, XP_055336280.1, XP_055336572.1, XP_055336745.1, XP_055336862.1, XP_055337792.1, XP_055339082.1, XP_055339247.1, XP_055339248.1, XP_055339249.1, XP_055340393.1, XP_055340852.1, XP_055340930.1, XP_055341431.1, XP_055342666.1, XP_055342667.1, XP_055342668.1, XP_055344849.1, XP_055344850.1, XP_055344851.1, XP_055344853.1, XP_055344854.1, XP_055344924.1, XP_055344926.1,…
OG0000115	g10151.t1, g10368.t1, g10411.t1, g10921.t1, g11110.t1, g11880.t1, g11881.t1, g12201.t1, g12414.t1, g1267.t1, g12709.t1, g1323.t1, g1324.t1, g13306.t1, g13635.t1, g13636.t1, g14621.t1, g14882.t1, g14932.t1, g15057.t1, g15282.t1, g15286.t1, g15300.t1, g1585.t1, g1585.t2, g2017.t1, g2329.t1, g2463.t1, g2840.t1, g51.t1, g533.t1, g8810.t1, g8814.t1, g9422.t1, g9423.t1, g9450.t1	OWA54359.1	XP_055340902.1, XP_055357334.1, XP_055357335.1, XP_055357336.1	GAV00140.1
OG0000116	g13263.t1, g14383.t1, g14409.t1, g2811.t1, g2812.t1, g2813.t1, g2815.t1, g5928.t1, g6718.t1, g7378.t1, g9258.t1, g9258.t2, g9259.t1, g9263.t1, g9808.t1	OQV12169.1, OQV12170.1, OQV12171.1, OQV12172.1, OQV12174.1, OQV12176.1, OQV16764.1, OQV16766.1, OQV16767.1, OQV16976.1, OQV16977.1, OQV17359.1, OQV17361.1, OQV25453.1, OQV26066.1, OWA53841.1, OWA54242.1, OWA55721.1	XP_055347697.1, XP_055348752.1, XP_055348754.1	GAU91918.1, GAU91919.1, GAU91920.1, GAU91921.1, GAU91922.1, GAU91923.1
OG0000117		OQV25908.1	XP_055356392.1, XP_055356394.1	GAU88650.1, GAU88651.1, GAU88652.1, GAU88653.1, GAU88654.1, GAU88655.1, GAU88656.1, GAU89935.1, GAU92148.1, GAU92149.1, GAU93239.1, GAU93240.1, GAU93241.1, GAU97625.1, GAU97626.1, GAU97627.1, GAU99069.1, GAU99070.1, GAU99286.1, GAU99287.1, GAU99395.1, GAU99396.1, GAU99397.1, GAV01746.1, GAV01747.1, GAV03674.1, GAV03675.1, GAV03676.1, GAV03677.1, GAV07102.1, GAV07103.1, GAV07104.1, GAV08907.1, GAV…
OG0000118			XP_055332530.1, XP_055332531.1, XP_055348788.1, XP_055348849.1, XP_055348850.1, XP_055349706.1, XP_055349707.1, XP_055351919.1, XP_055351920.1, XP_055351931.1, XP_055351933.1, XP_055351934.1, XP_055351939.1, XP_055351940.1, XP_055351942.1, XP_055351943.1, XP_055351944.1, XP_055351945.1, XP_055351946.1, XP_055351948.1, XP_055351949.1, XP_055351965.1, XP_055351966.1, XP_055351967.1, XP_055351968.1,…
OG0000119	g11776.t1, g12293.t1, g12680.t1, g12842.t1, g12880.t1, g13477.t1, g13690.t1, g13778.t1, g13947.t1, g13964.t1, g14668.t1, g15363.t1, g15431.t1, g15491.t1, g15492.t1, g15733.t1, g165.t1, g1721.t1, g2052.t1, g229.t1, g363.t1, g4086.t1, g4124.t1, g4256.t1, g4611.t1, g4903.t1, g56.t1, g5710.t1, g5918.t1, g5920.t1, g6270.t1, g6580.t1, g6777.t1, g6973.t1, g708.t1, g719.t1, g7592.t1, g9664.t1, g9690.t1		XP_055329379.1, XP_055329380.1
OG0000120	g10097.t1, g11244.t1, g11811.t1, g11812.t1, g11813.t1, g13487.t1, g15066.t1, g15067.t1, g15068.t1, g15227.t1, g15228.t1, g15389.t1, g15744.t1, g3746.t1, g4745.t1, g5543.t1, g5544.t1, g8039.t1, g9909.t1	OQV14197.1, OQV14198.1, OQV14199.1, OQV14200.1, OQV16272.1, OQV16273.1, OWA53553.1	XP_055340376.1, XP_055340377.1, XP_055340378.1, XP_055340379.1, XP_055343593.1, XP_055343594.1, XP_055350893.1, XP_055351566.1, XP_055351567.1, XP_055351568.1, XP_055356454.1, XP_055356455.1, XP_055357355.1, XP_055357356.1	GAU89227.1
OG0000121	g4170.t1	OQV11660.1, OQV12430.1, OQV13750.1, OQV13783.1, OQV14276.1, OQV14286.1, OQV14671.1, OQV15936.1, OQV16016.1, OQV16833.1, OQV16917.1, OQV17668.1, OQV17669.1, OQV17671.1, OQV18692.1, OQV18724.1, OQV18903.1, OQV19078.1, OQV19080.1, OQV19284.1, OQV19996.1, OQV20735.1, OQV21175.1, OQV22350.1, OQV23044.1, OQV23045.1, OQV24181.1, OQV24253.1, OQV25033.1, OQV25666.1, OQV25701.1, OQV26169.1, OWA50918.1, OWA…	XP_055342920.1, XP_055342928.1	GAU95345.1, GAV08932.1, GAV08933.1
OG0000122		OQV12415.1, OQV12432.1, OQV12440.1, OQV12901.1, OQV14609.1, OQV14610.1, OQV16149.1, OQV17385.1, OQV17387.1, OQV24125.1, OQV24164.1, OQV24188.1, OQV24207.1, OQV24789.1, OQV25658.1, OQV25659.1, OQV25660.1, OQV25661.1, OWA49807.1, OWA49809.1, OWA50617.1, OWA50812.1, OWA52086.1, OWA52087.1, OWA52089.1, OWA52090.1, OWA52092.1, OWA52409.1, OWA54024.1, OWA54025.1, OWA54026.1, OWA54027.1, OWA55309.1, OWA…	XP_055354045.1	GAU88979.1, GAU88980.1, GAU92470.1, GAU94534.1, GAU94749.1, GAU96018.1
OG0000123			XP_055329585.1, XP_055331224.1, XP_055334249.1, XP_055334297.1, XP_055334298.1, XP_055334299.1, XP_055334301.1, XP_055336301.1, XP_055337124.1, XP_055338377.1, XP_055339292.1, XP_055340245.1, XP_055342339.1, XP_055343078.1, XP_055343914.1, XP_055344772.1, XP_055344845.1, XP_055345010.1, XP_055345118.1, XP_055345276.1, XP_055345326.1, XP_055345783.1, XP_055347130.1, XP_055347900.1, XP_055348517.1,…
OG0000124			XP_055330825.1, XP_055332198.1, XP_055334135.1, XP_055334136.1, XP_055334137.1, XP_055334138.1, XP_055334144.1, XP_055334145.1, XP_055334146.1, XP_055334147.1, XP_055334148.1, XP_055334149.1, XP_055334151.1, XP_055334152.1, XP_055334153.1, XP_055334154.1, XP_055334155.1, XP_055334156.1, XP_055334158.1, XP_055334160.1, XP_055334162.1, XP_055334163.1, XP_055334164.1, XP_055334173.1, XP_055334174.1,…
OG0000125				GAU87230.1, GAU87231.1, GAU87276.1, GAU87503.1, GAU87504.1, GAU89377.1, GAU90567.1, GAU95251.1, GAU95252.1, GAU95280.1, GAU96188.1, GAU97327.1, GAU97328.1, GAU97806.1, GAU98589.1, GAU99375.1, GAU99376.1, GAV00122.1, GAV01126.1, GAV01379.1, GAV01380.1, GAV01749.1, GAV01750.1, GAV02044.1, GAV02588.1, GAV04379.1, GAV05055.1, GAV05056.1, GAV06636.1, GAV06637.1, GAV06889.1, GAV06890.1, GAV06891.1, GAV…
OG0000126	g11391.t1, g13065.t1	OQV12319.1, OQV18766.1	XP_055357674.1, XP_055357675.1, XP_055357676.1, XP_055357677.1	GAU88659.1, GAU89937.1, GAU89938.1, GAU92150.1, GAU93231.1, GAU93232.1, GAU93233.1, GAU93235.1, GAU93236.1, GAU93237.1, GAU97628.1, GAU97846.1, GAU99063.1, GAU99064.1, GAU99065.1, GAU99066.1, GAU99284.1, GAU99285.1, GAU99393.1, GAU99394.1, GAV01744.1, GAV01745.1, GAV03673.1, GAV07100.1, GAV07101.1, GAV08623.1, GAV09131.1, GAV09381.1, GAV09382.1, GAV09904.1, GAV09905.1, GAV10003.1
OG0000127	g10558.t1, g10682.t1, g10683.t1, g10940.t1, g110.t1, g112.t1, g11424.t1, g11475.t1, g11884.t1, g12679.t1, g12681.t1, g12828.t1, g12889.t1, g12908.t1, g12917.t1, g13080.t1, g13081.t1, g13389.t1, g14655.t1, g15238.t1, g15563.t1, g15576.t1, g1723.t1, g2722.t1, g378.t1, g398.t1, g4190.t1, g513.t1, g5169.t1, g5170.t1, g5364.t1, g5461.t1, g5462.t1, g6775.t1, g7595.t1, g7806.t1, g831.t1, g8350.t1, g8952…			GAV01656.1
OG0000128	g10135.t1, g11484.t1, g12041.t1, g12220.t1, g12222.t1, g12665.t1, g12890.t1, g13703.t1, g13986.t1, g14060.t1, g1462.t1, g1463.t1, g14885.t1, g15734.t1, g1601.t1, g1813.t1, g1813.t2, g216.t1, g4568.t1, g4872.t1, g5054.t1, g5289.t1, g5293.t1, g5973.t1, g6252.t1, g6258.t1, g6261.t1, g6262.t1, g6262.t2, g6264.t1, g821.t1, g9830.t1, g9872.t1	OQV16699.1, OQV16701.1	XP_055348086.1, XP_055351769.1, XP_055354000.1	GAV01411.1, GAV01412.1
OG0000129		OQV12433.1, OQV16375.1, OQV16376.1, OQV17049.1, OQV17050.1, OQV17395.1, OQV17584.1, OQV17585.1, OQV19320.1, OQV22970.1, OQV23286.1, OQV24199.1, OQV24200.1, OQV24209.1, OQV24980.1, OQV24981.1, OQV24983.1, OQV24984.1, OQV24985.1, OWA50182.1, OWA50183.1, OWA50184.1, OWA50185.1, OWA51371.1, OWA51372.1, OWA51373.1, OWA51374.1, OWA51376.1, OWA54417.1, OWA54418.1, OWA54419.1, OWA54420.1, OWA54421.1, OWA…		GAU87249.1, GAU95114.1
OG0000130	g11062.t1, g11254.t1, g11290.t1, g11593.t1, g11595.t1, g11606.t1, g11613.t1, g11614.t1, g11615.t1, g11620.t1, g11622.t1, g11623.t1, g12000.t1, g12663.t1, g13564.t1, g13827.t1, g14625.t1, g14629.t1, g14665.t1, g14869.t1, g14929.t1, g15296.t1, g15736.t1, g15750.t1, g1602.t1, g2322.t1, g3558.t1, g4096.t1, g4097.t1, g5471.t1, g5687.t1, g5775.t1, g66.t1, g7.t1, g8979.t1, g9027.t1, g9314.t1, g9656.t1			GAU94614.1
OG0000131	g334.t1	OQV14001.1, OQV19570.1, OQV20975.1, OQV20987.1, OQV21080.1, OQV23670.1, OWA52708.1	XP_055330347.1	GAU89264.1, GAU90371.1, GAU94854.1, GAU96621.1, GAU99077.1, GAV00063.1, GAV00270.1, GAV00271.1, GAV00922.1, GAV00923.1, GAV01009.1, GAV01080.1, GAV03821.1, GAV06038.1, GAV06624.1, GAV06625.1, GAV07381.1, GAV07382.1, GAV07841.1, GAV07854.1, GAV07987.1, GAV08095.1, GAV08583.1, GAV08674.1, GAV08803.1, GAV09017.1, GAV09068.1, GAV09125.1, GAV09126.1, GAV09683.1
OG0000132	g9037.t1			GAU87270.1, GAU87277.1, GAU87278.1, GAU89196.1, GAU89207.1, GAU89271.1, GAU89272.1, GAU89585.1, GAU89818.1, GAU89819.1, GAU89901.1, GAU90402.1, GAU90406.1, GAU90407.1, GAU90408.1, GAU90409.1, GAU90561.1, GAU90562.1, GAU91353.1, GAU91354.1, GAU94778.1, GAU97105.1, GAU99300.1, GAU99301.1, GAU99923.1, GAV00423.1, GAV00425.1, GAV00801.1, GAV01283.1, GAV06228.1, GAV06229.1, GAV06230.1, GAV06913.1, GAV…
OG0000133			XP_055328504.1, XP_055329900.1, XP_055329938.1, XP_055331222.1, XP_055332164.1, XP_055332165.1, XP_055333044.1, XP_055334225.1, XP_055338681.1, XP_055340858.1, XP_055343543.1, XP_055344369.1, XP_055344988.1, XP_055345223.1, XP_055347265.1, XP_055347368.1, XP_055348004.1, XP_055350040.1, XP_055350106.1, XP_055350175.1, XP_055350176.1, XP_055350323.1, XP_055351030.1, XP_055351504.1, XP_055351901.1,…
OG0000134	g10106.t1, g11095.t1, g11814.t1, g11815.t1, g11816.t1, g11818.t1, g11820.t1, g11822.t1, g12395.t1, g12711.t1, g12999.t1, g13867.t1, g13968.t1, g14043.t1, g14045.t1, g14094.t1, g14908.t1, g14910.t1, g14911.t1, g15169.t1, g15170.t1, g303.t1, g3030.t1, g3211.t1, g3212.t1, g353.t1, g354.t1, g3554.t1, g5396.t1, g5427.t1, g5892.t1, g7896.t1, g8389.t1, g8555.t1, g8556.t1, g8636.t1, g8987.t1, g9600.t1	OQV22997.1
OG0000135	g489.t1, g492.t1	OQV12442.1, OQV13488.1, OQV13615.1, OQV15181.1, OQV15182.1, OQV17317.1, OQV17318.1, OQV17754.1, OQV17755.1, OQV20597.1, OQV20602.1, OQV20605.1, OQV20606.1, OQV20607.1, OQV20613.1, OQV24147.1, OQV24148.1, OQV24173.1, OQV24179.1, OQV24180.1, OWA50133.1, OWA50821.1, OWA51174.1, OWA52766.1, OWA52769.1, OWA52904.1, OWA53213.1, OWA53566.1, OWA54237.1, OWA54238.1, OWA54396.1, OWA54399.1, OWA54437.1, OWA…	XP_055348999.1
OG0000136	g12021.t1, g12588.t1, g12720.t1, g13001.t1, g14342.t1, g14473.t1, g14581.t1, g1470.t1, g192.t1, g2055.t1, g2431.t1, g2774.t1, g3794.t1, g3912.t1, g4107.t1, g4241.t1, g4242.t1, g4243.t1, g4244.t1, g4610.t1, g5974.t1, g6118.t1, g6947.t1, g6950.t1, g6951.t1, g6952.t1, g6953.t1, g731.t1, g7727.t1, g9595.t1, g9832.t1	OQV15158.1, OQV16565.1, OQV20010.1, OQV20751.1		GAU89906.1, GAU97190.1, GAV06731.1, GAV09538.1
OG0000137	g1979.t1, g5382.t1		XP_055340573.1, XP_055341850.1, XP_055343046.1, XP_055343047.1, XP_055343048.1, XP_055343049.1, XP_055343051.1, XP_055343052.1, XP_055343053.1, XP_055343075.1, XP_055343093.1, XP_055343094.1, XP_055343095.1, XP_055343096.1, XP_055343097.1, XP_055343098.1, XP_055343113.1, XP_055343130.1, XP_055343131.1, XP_055343139.1, XP_055343144.1, XP_055343149.1, XP_055343153.1, XP_055343154.1, XP_055343155.1,…	GAU90633.1
OG0000138			XP_055329751.1, XP_055329752.1, XP_055329753.1, XP_055337029.1, XP_055337091.1, XP_055337092.1, XP_055343404.1, XP_055344005.1, XP_055344006.1, XP_055344007.1, XP_055344008.1, XP_055344009.1, XP_055344010.1, XP_055344011.1, XP_055353502.1, XP_055353503.1, XP_055355193.1, XP_055355194.1, XP_055355195.1, XP_055355196.1, XP_055355197.1, XP_055355198.1, XP_055355199.1, XP_055355207.1, XP_055355208.1,…
OG0000139	g10630.t1, g11026.t1, g1135.t1, g1136.t1, g115.t1, g11542.t1, g11846.t1, g11930.t1, g12048.t1, g12425.t1, g12996.t1, g13267.t1, g13528.t1, g1414.t1, g1449.t1, g14855.t1, g14856.t1, g15222.t1, g15366.t1, g15463.t1, g167.t1, g1836.t1, g2054.t1, g2590.t1, g2591.t1, g4876.t1, g6439.t1, g6820.t1, g6820.t2, g868.t1, g9036.t1, g9793.t1	OQV11960.1	XP_055337460.1, XP_055337461.1, XP_055337784.1	GAU92682.1, GAV10083.1
OG0000140	g12037.t1, g12038.t1, g12530.t1, g1546.t1, g1547.t1, g2085.t1, g4653.t1, g5290.t1, g5292.t1, g5975.t1, g5976.t1, g6789.t1, g6790.t1, g7672.t1, g8212.t1	OQV20810.1	XP_055343100.1, XP_055348623.1, XP_055349270.1, XP_055349271.1, XP_055349858.1, XP_055351191.1, XP_055351203.1, XP_055351214.1, XP_055351226.1, XP_055352746.1, XP_055352747.1, XP_055352748.1, XP_055352751.1, XP_055352757.1, XP_055356107.1, XP_055356108.1, XP_055356110.1, XP_055356119.1, XP_055356132.1, XP_055356133.1, XP_055357438.1	GAU95159.1
OG0000141	g12280.t1, g15384.t1, g2888.t1	OQV18017.1, OQV24090.1, OQV24091.1, OWA50250.1, OWA51501.1, OWA54595.1	XP_055335056.1, XP_055335057.1, XP_055335354.1, XP_055336022.1, XP_055338485.1, XP_055342131.1, XP_055344994.1, XP_055345159.1, XP_055345264.1, XP_055352210.1, XP_055352623.1	GAU90290.1, GAU90513.1, GAU90514.1, GAU90515.1, GAU90517.1, GAU92458.1, GAU92459.1, GAU92460.1, GAU94356.1, GAU95674.1, GAV00779.1, GAV01020.1, GAV01021.1, GAV02807.1, GAV04604.1, GAV05109.1, GAV05138.1, GAV05139.1
OG0000142	g13189.t1, g4560.t1, g4697.t1	OWA50160.1, OWA50161.1, OWA51240.1, OWA51241.1, OWA55088.1, OWA55089.1, OWA55090.1	XP_055347822.1, XP_055347823.1, XP_055347833.1, XP_055347837.1, XP_055347838.1, XP_055347843.1, XP_055347845.1, XP_055347846.1, XP_055347850.1, XP_055347915.1, XP_055347916.1, XP_055347917.1, XP_055354673.1	GAU87605.1, GAU87609.1, GAU87610.1, GAU87611.1, GAU87612.1, GAU87613.1, GAU87617.1, GAU87618.1, GAU92547.1, GAU99249.1, GAU99917.1, GAU99918.1, GAU99920.1, GAU99925.1, GAU99926.1
OG0000143			XP_055329906.1, XP_055329907.1, XP_055331203.1, XP_055331204.1, XP_055331218.1, XP_055332320.1, XP_055334279.1, XP_055334280.1, XP_055334281.1, XP_055334282.1, XP_055334283.1, XP_055335708.1, XP_055335710.1, XP_055335776.1, XP_055337911.1, XP_055344862.1, XP_055344863.1, XP_055344865.1, XP_055345094.1, XP_055345095.1, XP_055346546.1, XP_055348015.1, XP_055348016.1, XP_055348017.1, XP_055350409.1,…
OG0000144			XP_055335053.1, XP_055335860.1, XP_055335861.1, XP_055339141.1, XP_055339161.1, XP_055339162.1, XP_055339164.1, XP_055339165.1, XP_055339166.1, XP_055339174.1, XP_055339210.1, XP_055339211.1, XP_055341970.1, XP_055342583.1, XP_055342584.1, XP_055344336.1, XP_055344475.1, XP_055344483.1, XP_055344507.1, XP_055345409.1, XP_055346107.1, XP_055346108.1, XP_055347848.1, XP_055347849.1, XP_055349865.1,…
OG0000145			XP_055339078.1	GAU92023.1, GAU92026.1, GAU92086.1, GAU92157.1, GAU92159.1, GAU92164.1, GAU92165.1, GAU92166.1, GAU96911.1, GAU96913.1, GAV00410.1, GAV00411.1, GAV00412.1, GAV01118.1, GAV01120.1, GAV03714.1, GAV06772.1, GAV06785.1, GAV06830.1, GAV06847.1, GAV06848.1, GAV06849.1, GAV06850.1, GAV08544.1, GAV08566.1, GAV08567.1, GAV08569.1, GAV08570.1, GAV08662.1, GAV08663.1, GAV08664.1, GAV09517.1, GAV09518.1, GAV…
OG0000146	g10568.t1, g1260.t1, g1261.t1, g1261.t2, g1262.t1, g1263.t1, g1263.t2, g1264.t1, g1265.t1, g13697.t1, g9653.t1	OQV13470.1, OQV15590.1, OQV15591.1, OQV16865.1, OQV18383.1, OQV20263.1, OQV21547.1, OQV21654.1, OQV21655.1, OQV23218.1	XP_055330565.1, XP_055334646.1, XP_055337186.1, XP_055338869.1, XP_055345131.1, XP_055345301.1, XP_055355640.1, XP_055357665.1	GAU88113.1, GAU88387.1, GAV02176.1, GAV02446.1, GAV06214.1, GAV06915.1, GAV06916.1, GAV09045.1
OG0000147	g13574.t1, g6885.t1	OQV11785.1, OQV11786.1, OQV14500.1, OQV14501.1, OQV14502.1, OQV15666.1, OQV19751.1, OQV19752.1, OQV19754.1, OQV19756.1, OQV19757.1, OQV19758.1, OQV19759.1, OQV19764.1, OQV19765.1, OQV19937.1, OQV19938.1, OQV22611.1, OQV22612.1, OQV24812.1, OQV24813.1, OQV24978.1, OWA51079.1, OWA51080.1, OWA51081.1, OWA51082.1, OWA51405.1, OWA51407.1, OWA51412.1, OWA51916.1, OWA52447.1, OWA52448.1, OWA54955.1, OWA…		GAU96502.1
OG0000148			XP_055327566.1, XP_055329581.1, XP_055330389.1, XP_055330440.1, XP_055330532.1, XP_055336596.1, XP_055342562.1, XP_055342563.1, XP_055342564.1, XP_055342565.1, XP_055344045.1, XP_055344046.1, XP_055344048.1, XP_055344049.1, XP_055344063.1, XP_055344064.1, XP_055344065.1, XP_055344066.1, XP_055347527.1, XP_055348749.1, XP_055352889.1, XP_055352990.1, XP_055353868.1, XP_055353869.1, XP_055354134.1,…
OG0000149			XP_055339188.1, XP_055339190.1, XP_055339191.1, XP_055339192.1, XP_055339290.1, XP_055344880.1, XP_055344881.1, XP_055344882.1, XP_055344883.1, XP_055344894.1, XP_055344895.1, XP_055344896.1, XP_055344914.1, XP_055344915.1, XP_055344916.1, XP_055344917.1, XP_055344955.1, XP_055344977.1, XP_055344979.1, XP_055344983.1, XP_055344984.1, XP_055344989.1, XP_055344990.1, XP_055345283.1, XP_055346544.1,…
OG0000150	g11414.t1, g11518.t1, g11631.t1, g14500.t1, g14727.t1, g6899.t1			GAU87141.1, GAU88241.1, GAU89225.1, GAU89387.1, GAU89936.1, GAU90600.1, GAU90601.1, GAU91266.1, GAU91303.1, GAU91315.1, GAU91897.1, GAU92888.1, GAU94695.1, GAU95732.1, GAU96168.1, GAU97015.1, GAU99272.1, GAV00496.1, GAV01599.1, GAV02936.1, GAV04062.1, GAV04368.1, GAV05059.1, GAV05158.1, GAV05159.1, GAV06128.1, GAV06969.1, GAV07605.1, GAV09616.1, GAV10028.1
OG0000151	g10458.t1, g10467.t1, g10468.t1, g10469.t1, g10470.t1, g11059.t1, g11061.t1, g11933.t1, g1380.t1, g13800.t1, g13802.t1, g13802.t2, g13803.t1, g14328.t1, g14329.t1, g14481.t1, g14793.t1, g2514.t1, g2515.t1, g5547.t1, g5779.t1, g7213.t1, g7217.t1, g7219.t1, g7220.t1, g7221.t1, g7223.t1, g7224.t1, g8667.t1, g9270.t1	OQV11673.1, OQV20635.1, OQV20637.1, OQV20638.1		GAV09528.1
OG0000152	g1410.t1	OQV14862.1, OQV17148.1, OQV22708.1, OQV23400.1, OQV23401.1, OQV23402.1	XP_055343117.1, XP_055343118.1, XP_055343123.1, XP_055343143.1, XP_055344510.1, XP_055344511.1, XP_055353160.1	GAU87358.1, GAU91260.1, GAU92379.1, GAU92380.1, GAU94788.1, GAU95749.1, GAU95846.1, GAU95847.1, GAU96036.1, GAU96037.1, GAU99236.1, GAU99237.1, GAV01261.1, GAV02209.1, GAV02210.1, GAV05359.1, GAV05360.1, GAV07355.1, GAV08302.1, GAV09124.1, GAV09163.1
OG0000153	g12528.t1, g15649.t1, g1942.t1, g2800.t1, g3992.t1, g4087.t1, g5387.t1, g710.t1		XP_055332373.1, XP_055335805.1, XP_055335806.1, XP_055335807.1, XP_055335808.1, XP_055335810.1, XP_055335811.1, XP_055335812.1, XP_055335813.1, XP_055335814.1, XP_055335909.1, XP_055335911.1, XP_055344422.1, XP_055344459.1, XP_055350660.1, XP_055352352.1, XP_055352353.1, XP_055352359.1, XP_055352907.1, XP_055352908.1, XP_055352909.1, XP_055352910.1, XP_055352911.1, XP_055352912.1, XP_055355488.1	GAV01346.1, GAV06926.1
OG0000154	g10923.t1, g12311.t1, g6709.t1, g8358.t1, g8359.t1, g9343.t1, g9878.t1	OQV11624.1, OQV11625.1, OQV11626.1, OQV11627.1, OQV11628.1, OQV11629.1, OQV11630.1, OQV12044.1, OQV12045.1, OQV12046.1, OQV12047.1, OQV17407.1, OQV22016.1, OWA50616.1, OWA50625.1, OWA50626.1, OWA52027.1, OWA52028.1, OWA54062.1, OWA55248.1	XP_055344683.1, XP_055347111.1, XP_055347333.1, XP_055347698.1, XP_055347699.1	GAU91539.1, GAU91540.1, GAU91541.1
OG0000155	g10272.t1, g11889.t1, g15092.t1, g1756.t1	OQV15368.1, OQV15401.1, OQV15406.1, OQV15407.1, OQV15408.1, OQV15411.1, OQV15412.1, OQV15799.1, OQV15801.1, OQV15802.1, OQV17863.1, OQV17865.1, OQV18367.1, OQV18368.1, OQV19977.1, OQV23386.1, OQV25670.1, OWA51952.1, OWA51953.1	XP_055329799.1, XP_055342491.1, XP_055342493.1, XP_055348430.1, XP_055348681.1, XP_055353603.1, XP_055354862.1	GAU89707.1, GAU91696.1, GAU92639.1, GAV00742.1, GAV00802.1
OG0000156			XP_055331124.1, XP_055331234.1, XP_055335850.1, XP_055335851.1, XP_055335852.1, XP_055335890.1, XP_055335923.1, XP_055335931.1, XP_055335934.1, XP_055335935.1, XP_055335936.1, XP_055340909.1, XP_055340910.1, XP_055340934.1, XP_055340936.1, XP_055340937.1, XP_055340938.1, XP_055340976.1, XP_055340983.1, XP_055344956.1, XP_055344971.1, XP_055344980.1, XP_055344981.1, XP_055344985.1, XP_055345328.1,…
OG0000157	g10416.t1, g11556.t1, g12017.t1, g12587.t1, g12925.t1, g13019.t1, g13473.t1, g14054.t1, g14651.t1, g14853.t1, g15280.t1, g231.t1, g233.t1, g2714.t1, g2716.t1, g2717.t1, g310.t1, g3239.t1, g4295.t1, g4296.t1, g4297.t1, g4718.t1, g4780.t1, g4936.t1, g4937.t1, g512.t1, g6194.t1, g6195.t1, g6793.t1, g709.t1, g8214.t1, g8406.t1, g9496.t1		XP_055355961.1
OG0000158	g14666.t1, g3183.t1, g6173.t1, g6310.t1	OQV22368.1, OQV24155.1	XP_055330590.1, XP_055334966.1, XP_055336374.1, XP_055340154.1, XP_055340155.1, XP_055340156.1, XP_055340157.1, XP_055340158.1, XP_055340159.1, XP_055343010.1, XP_055344314.1, XP_055351690.1, XP_055352257.1, XP_055356937.1, XP_055357055.1, XP_055357063.1, XP_055357071.1, XP_055357337.1, XP_055357338.1, XP_055357339.1, XP_055357340.1, XP_055357341.1, XP_055357342.1, XP_055357953.1, XP_055357954.1,…
OG0000159	g13251.t1, g15239.t1	OQV12842.1, OQV12843.1, OWA50258.1, OWA50259.1, OWA52062.1, OWA52232.1, OWA52266.1, OWA52410.1, OWA54107.1, OWA54780.1, OWA54781.1, OWA54782.1	XP_055334206.1, XP_055334207.1, XP_055334304.1, XP_055334306.1, XP_055337626.1, XP_055337628.1, XP_055342397.1, XP_055347712.1, XP_055352507.1, XP_055352508.1, XP_055352525.1, XP_055352526.1, XP_055352532.1, XP_055352533.1, XP_055352534.1, XP_055352535.1, XP_055352541.1, XP_055352553.1, XP_055352557.1, XP_055354981.1
OG0000160		OQV20650.1, OQV20651.1	XP_055344753.1, XP_055344755.1, XP_055344756.1, XP_055347337.1, XP_055347432.1, XP_055347445.1, XP_055347451.1, XP_055347452.1, XP_055347454.1, XP_055347455.1, XP_055347456.1, XP_055347457.1, XP_055348162.1, XP_055352312.1, XP_055352320.1, XP_055354953.1, XP_055354954.1	GAU89731.1, GAU90375.1, GAU91793.1, GAU91860.1, GAU91937.1, GAU97072.1, GAV00357.1, GAV00398.1, GAV00933.1, GAV00982.1, GAV02760.1, GAV02762.1, GAV06800.1, GAV06909.1, GAV06914.1
OG0000161		OQV12336.1, OQV12484.1, OQV12737.1, OQV12900.1, OQV15789.1, OQV17056.1, OQV19423.1, OQV19965.1, OQV19966.1, OQV22965.1, OQV22966.1, OWA51317.1, OWA52101.1, OWA52102.1, OWA52114.1, OWA54313.1, OWA54314.1, OWA54609.1, OWA54610.1, OWA54659.1, OWA54660.1, OWA54661.1, OWA54662.1, OWA54663.1	XP_055328302.1, XP_055328316.1, XP_055336667.1, XP_055347374.1, XP_055348966.1, XP_055348967.1, XP_055352054.1	GAV03953.1, GAV06997.1
OG0000162			XP_055333101.1, XP_055343070.1, XP_055343071.1, XP_055343072.1, XP_055343073.1, XP_055350960.1, XP_055350988.1, XP_055350996.1, XP_055351000.1, XP_055351001.1, XP_055351002.1, XP_055351004.1, XP_055351005.1, XP_055351008.1, XP_055351015.1, XP_055351016.1, XP_055351017.1, XP_055351021.1, XP_055351028.1, XP_055351029.1, XP_055351032.1, XP_055351039.1, XP_055352815.1, XP_055354373.1, XP_055354374.1,…
OG0000163			XP_055334087.1, XP_055334088.1, XP_055334089.1, XP_055334090.1, XP_055334091.1, XP_055334092.1, XP_055334093.1, XP_055334095.1, XP_055334096.1, XP_055334097.1, XP_055334098.1, XP_055334099.1, XP_055334100.1, XP_055334103.1, XP_055334104.1, XP_055334105.1, XP_055334106.1, XP_055334107.1, XP_055334115.1, XP_055334126.1, XP_055334133.1, XP_055334134.1, XP_055334141.1, XP_055334142.1, XP_055334179.1,…
OG0000164				GAU89718.1, GAU89840.1, GAU89841.1, GAU90066.1, GAU90765.1, GAU91264.1, GAU91265.1, GAU92407.1, GAU92447.1, GAU94407.1, GAU94408.1, GAU94787.1, GAU97185.1, GAU97186.1, GAU99978.1, GAV00095.1, GAV00503.1, GAV02825.1, GAV02826.1, GAV03390.1, GAV03391.1, GAV03558.1, GAV03691.1, GAV03773.1, GAV03774.1, GAV05883.1, GAV05884.1, GAV06233.1, GAV06446.1, GAV06887.1, GAV06888.1, GAV09003.1, GAV09580.1
OG0000165	g11152.t1, g14483.t1, g1552.t1, g8592.t1, g9598.t1	OQV11866.1, OQV24850.1, OWA52782.1, OWA53045.1, OWA55053.1	XP_055344488.1, XP_055345206.1, XP_055345207.1, XP_055345208.1, XP_055345209.1, XP_055345611.1, XP_055345612.1, XP_055345614.1, XP_055348738.1, XP_055349801.1, XP_055349802.1, XP_055349803.1, XP_055349805.1, XP_055349806.1, XP_055349807.1, XP_055349808.1, XP_055353604.1, XP_055353605.1, XP_055357886.1, XP_055357894.1	GAV02593.1, GAV02594.1
OG0000166	g3249.t1	OQV11684.1, OQV11685.1, OQV12924.1, OQV14528.1, OQV14529.1, OQV15619.1, OQV15620.1, OQV15621.1, OQV15622.1, OQV15623.1, OQV15624.1, OQV18824.1, OQV18825.1, OQV21391.1, OQV21392.1, OQV21393.1, OQV21394.1, OQV21395.1, OQV21396.1, OQV22760.1, OQV23503.1, OQV23504.1, OQV24875.1, OWA49836.1, OWA49943.1, OWA52257.1	XP_055346039.1	GAU90239.1, GAV04592.1, GAV04939.1, GAV04993.1
OG0000167		OQV11495.1, OQV11496.1, OQV11497.1, OQV14579.1, OQV14584.1, OQV19445.1, OQV19446.1, OQV24160.1, OQV25707.1, OQV25708.1, OQV25709.1, OQV25710.1, OQV25711.1, OWA51291.1, OWA53937.1, OWA53939.1, OWA53940.1, OWA55640.1		GAV00035.1, GAV00037.1, GAV00075.1, GAV00076.1, GAV00078.1, GAV00079.1, GAV00081.1, GAV00082.1, GAV00083.1, GAV00084.1, GAV00087.1, GAV00827.1, GAV06918.1, GAV06940.1
OG0000168		OQV11850.1, OQV13734.1, OQV16557.1, OQV16558.1, OQV18483.1, OQV19668.1, OQV19669.1, OQV19670.1, OQV23071.1, OQV23073.1, OQV23408.1, OQV24170.1, OWA50491.1, OWA50492.1, OWA51932.1, OWA51933.1, OWA51934.1, OWA51935.1, OWA51936.1, OWA51937.1, OWA52755.1, OWA52756.1, OWA52757.1, OWA52759.1, OWA52760.1, OWA52761.1, OWA52762.1, OWA55433.1, OWA55466.1, OWA55590.1, OWA55614.1, OWA55622.1
OG0000169		OWA52936.1		GAU87831.1, GAU88714.1, GAU89361.1, GAU89680.1, GAU89871.1, GAU90214.1, GAU90215.1, GAU90275.1, GAU90448.1, GAU90553.1, GAU90991.1, GAU91779.1, GAU92571.1, GAU94808.1, GAU95302.1, GAU95485.1, GAU96220.1, GAU96221.1, GAU97702.1, GAU99629.1, GAU99646.1, GAV04128.1, GAV04670.1, GAV06474.1, GAV07049.1, GAV07615.1, GAV07644.1, GAV08021.1, GAV08467.1, GAV09268.1, GAV09269.1
OG0000170			XP_055327347.1, XP_055329737.1, XP_055330322.1, XP_055330323.1, XP_055330325.1, XP_055330460.1, XP_055333932.1, XP_055335862.1, XP_055340488.1, XP_055340940.1, XP_055344216.1, XP_055344231.1, XP_055344273.1, XP_055344274.1, XP_055344275.1, XP_055344276.1, XP_055344277.1, XP_055344301.1, XP_055344703.1, XP_055345037.1, XP_055345061.1, XP_055345074.1, XP_055345075.1, XP_055345179.1, XP_055345180.1,…
OG0000171			XP_055327469.1, XP_055327479.1, XP_055327485.1, XP_055327494.1, XP_055327503.1, XP_055331064.1, XP_055331065.1, XP_055335932.1, XP_055336818.1, XP_055336860.1, XP_055337053.1, XP_055337054.1, XP_055340695.1, XP_055348158.1, XP_055348159.1, XP_055348160.1, XP_055350734.1, XP_055350838.1, XP_055350847.1, XP_055350856.1, XP_055351040.1, XP_055351042.1, XP_055351043.1, XP_055351047.1, XP_055352151.1,…
OG0000172			XP_055328884.1, XP_055328885.1, XP_055329685.1, XP_055329726.1, XP_055329727.1, XP_055329728.1, XP_055329729.1, XP_055334999.1, XP_055335035.1, XP_055345112.1, XP_055345113.1, XP_055345122.1, XP_055345123.1, XP_055345124.1, XP_055345125.1, XP_055345126.1, XP_055345127.1, XP_055345128.1, XP_055345129.1, XP_055345130.1, XP_055345133.1, XP_055345169.1, XP_055345337.1, XP_055346048.1, XP_055346050.1,…
OG0000173	g10263.t1, g12381.t1, g13035.t1, g13854.t1, g13855.t1, g1461.t1, g15504.t1, g1599.t1, g2516.t1, g2642.t1, g364.t1, g4977.t1, g7297.t1, g838.t1, g9347.t1, g9624.t1, g9958.t1	OQV11947.1, OQV11948.1, OQV12563.1, OQV21389.1, OQV22947.1, OQV22948.1, OQV23399.1, OWA51021.1, OWA51441.1	XP_055340757.1, XP_055340760.1, XP_055344489.1, XP_055344496.1	GAV06063.1
OG0000174	g10929.t1, g14705.t1, g14896.t1, g14896.t2, g3522.t1, g4052.t1, g5369.t1, g6728.t1, g6795.t1	OQV11689.1, OQV13357.1, OQV13358.1, OQV14574.1, OQV21848.1, OQV21985.1, OQV21986.1, OQV23314.1, OWA50396.1, OWA50397.1, OWA51153.1, OWA51154.1, OWA51161.1, OWA51976.1, OWA51977.1, OWA51984.1, OWA51985.1, OWA53488.1, OWA53489.1, OWA53490.1, OWA55103.1		GAU92155.1
OG0000175	g1313.t1	OQV12712.1, OQV12713.1, OQV12814.1, OQV14469.1, OQV14873.1, OQV14874.1, OQV14878.1, OQV14879.1, OQV14890.1, OQV14891.1, OQV15766.1, OQV17543.1, OQV22007.1, OQV23491.1, OQV23492.1, OQV23493.1, OQV24793.1, OWA51039.1, OWA51042.1, OWA51043.1, OWA51045.1, OWA51048.1, OWA51275.1, OWA52566.1, OWA52883.1, OWA53964.1, OWA55675.1	XP_055357944.1	GAU89546.1, GAU89547.1
OG0000176	g10531.t1, g12407.t1, g12592.t1, g13397.t1, g13400.t1, g13988.t1, g14341.t1, g14563.t1, g14564.t1, g14565.t1, g14707.t1, g14709.t1, g14883.t1, g14884.t1, g14895.t1, g14897.t1, g15302.t1, g15303.t1, g2018.t1, g4328.t1, g4946.t1, g6782.t1, g6784.t1, g9302.t1, g9305.t1, g9306.t1, g9307.t1, g9308.t1, g9433.t1, g9434.t1, g9449.t1
OG0000177	g11883.t1, g13069.t1, g14325.t1, g15220.t1, g18.t1, g198.t1, g4329.t1, g5043.t1, g521.t1, g5308.t1, g5415.t1, g6237.t1, g6238.t1	OQV12339.1, OQV19644.1, OQV20802.1, OQV20804.1, OQV20890.1, OQV20891.1, OWA51339.1, OWA53550.1, OWA53551.1, OWA53768.1, OWA53769.1, OWA53770.1, OWA53966.1, OWA53967.1	XP_055355707.1	GAU94357.1, GAV00031.1, GAV00032.1
OG0000178	g1429.t1	OQV12693.1, OQV12694.1, OQV12695.1, OQV12696.1, OQV12697.1, OQV12699.1, OQV12700.1, OQV12701.1, OQV13090.1, OQV14050.1, OWA51574.1, OWA52774.1, OWA52775.1, OWA52776.1, OWA52777.1, OWA52779.1, OWA52780.1, OWA52781.1, OWA52892.1	XP_055344464.1, XP_055346574.1, XP_055346576.1, XP_055350538.1	GAU95806.1, GAU95807.1, GAU95809.1, GAU95931.1, GAV01772.1, GAV02595.1, GAV02597.1
OG0000179			XP_055343152.1, XP_055350959.1, XP_055350962.1, XP_055350963.1, XP_055350964.1, XP_055350965.1, XP_055350966.1, XP_055350967.1, XP_055350968.1, XP_055350969.1, XP_055350971.1, XP_055350972.1, XP_055350973.1, XP_055350974.1, XP_055350975.1, XP_055350977.1, XP_055350978.1, XP_055350995.1, XP_055350997.1, XP_055350998.1, XP_055351009.1, XP_055351010.1, XP_055351011.1, XP_055356715.1, XP_055356740.1,…
OG0000180	g13398.t1, g13537.t1, g1420.t1, g14566.t1, g2503.t1, g5425.t1, g877.t1, g9300.t1, g9303.t1, g9694.t1	OQV15003.1, OQV15023.1, OWA51559.1	XP_055329679.1, XP_055329681.1, XP_055329682.1, XP_055329683.1, XP_055329684.1, XP_055330655.1, XP_055344388.1, XP_055344390.1, XP_055344838.1, XP_055349193.1, XP_055349302.1, XP_055351897.1, XP_055355261.1, XP_055355270.1, XP_055356658.1, XP_055357304.1, XP_055357387.1
OG0000181	g13038.t1, g13039.t1, g7451.t1	OQV13519.1, OQV17087.1, OQV25829.1, OQV25830.1, OQV25832.1, OQV25833.1, OQV25836.1, OQV25837.1, OQV25842.1, OQV25843.1, OQV25847.1, OQV25848.1, OQV26095.1, OQV26096.1, OQV26098.1, OWA51101.1, OWA54565.1, OWA54566.1, OWA54569.1, OWA54570.1, OWA54572.1, OWA54573.1, OWA55462.1		GAU89669.1, GAU89670.1, GAU89671.1, GAV09048.1
OG0000182	g11083.t1, g11084.t1, g13691.t1, g13693.t1, g13694.t1, g13694.t2, g15587.t1, g15590.t1, g3238.t1, g3395.t1, g4349.t1, g8594.t1, g8594.t2	OQV14012.1, OQV14013.1, OQV14014.1, OQV14015.1, OWA55275.1, OWA55276.1	XP_055345481.1, XP_055348320.1, XP_055348355.1, XP_055351556.1, XP_055351557.1	GAU92845.1, GAV06315.1, GAV06328.1, GAV06329.1, GAV06330.1, GAV06331.1
OG0000183	g7419.t1	OWA49963.1, OWA55609.1	XP_055334192.1, XP_055334194.1, XP_055334195.1, XP_055335929.1, XP_055335943.1, XP_055339570.1, XP_055343469.1, XP_055343527.1, XP_055343528.1, XP_055343529.1, XP_055343595.1, XP_055343596.1, XP_055343597.1, XP_055343598.1, XP_055343651.1, XP_055343652.1, XP_055343653.1, XP_055354026.1, XP_055354027.1, XP_055354028.1, XP_055354029.1, XP_055354030.1, XP_055357398.1, XP_055357399.1	GAU88149.1, GAV01393.1, GAV05714.1
OG0000184		OQV11388.1, OQV19939.1, OQV19940.1, OQV19941.1, OQV19943.1, OQV19944.1, OQV19945.1, OQV19946.1, OQV19948.1, OQV21168.1, OQV21170.1, OQV21173.1, OQV21174.1, OQV21176.1, OQV23341.1, OQV23342.1, OQV23343.1, OQV24938.1, OWA50592.1, OWA50593.1, OWA50595.1, OWA53097.1, OWA53111.1, OWA53112.1, OWA53113.1	XP_055347788.1, XP_055347790.1	GAV06726.1, GAV06727.1, GAV07277.1
OG0000185		OQV11777.1, OQV12325.1, OQV12326.1, OQV16300.1, OQV18016.1, OQV18369.1, OQV22855.1, OQV22856.1, OQV23208.1, OQV23635.1, OQV23636.1, OQV24137.1, OQV24903.1, OQV25508.1, OQV25510.1, OQV25536.1, OQV25537.1, OQV25540.1, OQV25706.1, OWA50464.1, OWA50699.1, OWA50755.1, OWA53261.1, OWA53642.1, OWA53643.1, OWA53953.1, OWA53954.1, OWA54547.1, OWA54548.1, OWA54931.1
OG0000186			XP_055329002.1, XP_055329011.1, XP_055338517.1, XP_055338595.1, XP_055344367.1, XP_055344402.1, XP_055344403.1, XP_055344404.1, XP_055344405.1, XP_055344406.1, XP_055344407.1, XP_055344474.1, XP_055344486.1, XP_055344487.1, XP_055352254.1, XP_055352255.1, XP_055352256.1, XP_055352258.1, XP_055352259.1, XP_055352260.1, XP_055352261.1, XP_055352262.1, XP_055352263.1, XP_055352577.1, XP_055352578.1,…
OG0000187			XP_055344372.1, XP_055344417.1, XP_055344444.1, XP_055344445.1, XP_055344446.1, XP_055344453.1, XP_055350013.1, XP_055350014.1, XP_055350015.1, XP_055350019.1, XP_055350020.1, XP_055350021.1, XP_055350036.1, XP_055350037.1, XP_055350063.1, XP_055350064.1, XP_055350071.1, XP_055350075.1, XP_055350084.1, XP_055350088.1, XP_055350796.1, XP_055350797.1, XP_055353004.1, XP_055353011.1, XP_055353019.1,…
OG0000188		OQV11604.1, OQV11607.1, OQV11972.1, OQV14916.1, OQV14919.1, OQV15410.1, OQV15758.1, OQV17216.1, OQV17423.1, OQV17424.1, OQV20025.1, OQV20026.1, OQV20027.1, OQV20029.1, OQV20030.1, OQV20040.1, OQV20041.1, OQV20042.1, OQV20043.1, OQV20044.1, OQV20046.1, OQV20047.1, OQV24190.1, OWA50941.1, OWA53677.1, OWA54506.1, OWA54705.1, OWA54802.1, OWA54804.1
OG0000189	g10405.t1, g11064.t1, g12715.t1, g12717.t1, g1816.t1, g1830.t1, g1831.t1, g1833.t1, g2575.t1, g5271.t1, g5276.t1, g5444.t1, g5690.t1, g9867.t1	OQV14817.1, OWA54147.1, OWA54393.1	XP_055329782.1, XP_055329783.1	GAU87279.1, GAU89821.1, GAU89823.1, GAU94777.1, GAU99294.1, GAV00426.1, GAV00427.1, GAV00428.1, GAV00799.1, GAV07037.1
OG0000190	g10563.t1, g10564.t1, g13637.t1, g1990.t1, g3166.t1, g3534.t1, g3535.t1, g4704.t1, g5379.t1, g5494.t1, g563.t1, g5769.t1, g6170.t1		XP_055332288.1, XP_055332317.1, XP_055332564.1, XP_055332593.1, XP_055340860.1, XP_055345262.1, XP_055345265.1, XP_055346099.1, XP_055353206.1, XP_055355848.1, XP_055356977.1	GAU87703.1, GAU89343.1, GAU91571.1, GAU96060.1, GAV09555.1
OG0000191	g10536.t1, g11636.t1, g11916.t1, g11916.t2, g11927.t1, g13361.t1, g13362.t1, g1374.t1, g1374.t2, g14924.t1, g3355.t1, g3394.t1, g5374.t1, g5475.t1, g553.t1, g6538.t1, g9375.t1, g9472.t1, g9953.t1	OQV18808.1, OQV20724.1, OQV22589.1, OQV22590.1, OQV22591.1, OWA52128.1	XP_055348555.1, XP_055348556.1, XP_055351579.1	GAV00646.1
OG0000192	g15312.t1	OQV13735.1, OQV15384.1, OQV19855.1, OQV19856.1, OQV20728.1, OQV20766.1, OQV20768.1, OQV20769.1, OQV20783.1, OQV20785.1, OQV22204.1, OQV22205.1, OQV22615.1, OQV23610.1, OQV23611.1, OQV23612.1, OWA49816.1, OWA49817.1, OWA49818.1, OWA49820.1, OWA55521.1		GAU92248.1, GAV00403.1, GAV00430.1, GAV00431.1, GAV00670.1, GAV00673.1, GAV00875.1
OG0000193	g10127.t1, g10130.t1, g11144.t1, g11169.t1, g11778.t1, g11835.t1, g11853.t1, g13555.t1, g14339.t1, g15364.t1, g1940.t1, g2822.t1, g2823.t1, g461.t1, g5420.t1, g5421.t1, g5422.t1, g5430.t1, g5431.t1, g5432.t1, g7244.t1, g7245.t1, g7246.t1, g8103.t1, g8104.t1, g8972.t1	OQV18624.1, OQV18625.1	XP_055338531.1
OG0000194	g12028.t1	OQV20672.1, OQV21927.1, OQV21928.1, OQV21929.1, OQV22720.1, OQV22721.1, OQV25697.1, OWA50450.1, OWA50451.1, OWA50452.1, OWA50453.1, OWA50454.1, OWA53726.1, OWA54162.1, OWA54163.1, OWA54189.1, OWA54190.1, OWA54205.1, OWA54206.1, OWA54756.1, OWA54757.1, OWA54758.1, OWA54958.1, OWA54959.1, OWA54960.1	XP_055350724.1	GAU92483.1, GAV04557.1
OG0000195	g12769.t1, g12769.t2, g1413.t1, g1997.t1, g1997.t2, g1997.t3, g9387.t1	OQV14320.1, OWA53585.1, OWA53595.1, OWA54098.1, OWA54100.1, OWA54101.1, OWA54102.1, OWA54103.1, OWA54873.1, OWA54875.1	XP_055338097.1, XP_055349351.1, XP_055349352.1, XP_055353800.1, XP_055353809.1, XP_055353818.1	GAU95211.1, GAU95212.1, GAU95295.1, GAU95325.1, GAU95326.1, GAV10066.1
OG0000196			XP_055330597.1, XP_055330696.1, XP_055330716.1, XP_055330718.1, XP_055330719.1, XP_055330723.1, XP_055330740.1, XP_055330741.1, XP_055330766.1, XP_055330795.1, XP_055330812.1, XP_055330814.1, XP_055330815.1, XP_055330816.1, XP_055330818.1, XP_055331554.1, XP_055340933.1, XP_055345032.1, XP_055345090.1, XP_055348213.1, XP_055348214.1, XP_055349871.1, XP_055349966.1, XP_055350777.1, XP_055351776.1,…
OG0000197			XP_055341539.1, XP_055343109.1, XP_055343121.1, XP_055343132.1, XP_055343140.1, XP_055344992.1, XP_055344993.1, XP_055346174.1, XP_055346175.1, XP_055346203.1, XP_055346204.1, XP_055346205.1, XP_055346206.1, XP_055346218.1, XP_055348101.1, XP_055348591.1, XP_055348597.1, XP_055349004.1, XP_055349011.1, XP_055349013.1, XP_055349014.1, XP_055349016.1, XP_055352332.1, XP_055352333.1, XP_055352334.1,…
OG0000198	g3466.t1		XP_055330957.1, XP_055330965.1, XP_055330966.1, XP_055333876.1, XP_055346541.1, XP_055346568.1, XP_055347992.1, XP_055347993.1, XP_055348032.1, XP_055348036.1, XP_055353976.1, XP_055353980.1	GAU92100.1, GAU92101.1, GAU92102.1, GAU92504.1, GAU92505.1, GAU94593.1, GAV02829.1, GAV02830.1, GAV02831.1, GAV02832.1, GAV02841.1, GAV06580.1, GAV06581.1, GAV06582.1, GAV08170.1
OG0000199			XP_055339085.1, XP_055339500.1, XP_055344939.1, XP_055347352.1, XP_055347353.1, XP_055347354.1, XP_055347355.1, XP_055347357.1, XP_055347358.1, XP_055347359.1, XP_055347366.1, XP_055347425.1, XP_055347427.1, XP_055347442.1, XP_055347450.1, XP_055347461.1, XP_055348904.1, XP_055348905.1, XP_055348962.1, XP_055348964.1, XP_055350253.1, XP_055350272.1, XP_055351599.1, XP_055352317.1, XP_055353510.1,…
OG0000200	g4919.t1	OQV13486.1, OQV17353.1, OQV17643.1, OQV20693.1, OWA52869.1, OWA52870.1, OWA52908.1, OWA55132.1	XP_055337543.1	GAU90429.1, GAU90430.1, GAU90498.1, GAU91496.1, GAU92879.1, GAU94590.1, GAU94693.1, GAU95073.1, GAU95074.1, GAV00472.1, GAV00473.1, GAV01251.1, GAV01545.1, GAV03767.1, GAV07562.1, GAV09203.1, GAV09204.1, GAV09696.1
OG0000201			XP_055327937.1, XP_055333702.1, XP_055333703.1, XP_055333704.1, XP_055333747.1, XP_055333749.1, XP_055333750.1, XP_055333818.1, XP_055333819.1, XP_055333820.1, XP_055333821.1, XP_055333950.1, XP_055333977.1, XP_055334009.1, XP_055340227.1, XP_055340251.1, XP_055340274.1, XP_055349697.1, XP_055352001.1, XP_055353492.1, XP_055353516.1, XP_055355606.1, XP_055355693.1, XP_055355694.1, XP_055355695.1,…
OG0000202	g12823.t1, g12825.t1, g14803.t1, g15259.t1, g15261.t1, g4246.t1, g8373.t1, g8836.t1, g8836.t2, g9944.t1	OQV13527.1, OQV13529.1, OQV13533.1, OQV13807.1, OQV23272.1, OQV25382.1, OQV25383.1, OWA50164.1, OWA52344.1, OWA54287.1, OWA54331.1, OWA54333.1, OWA54335.1, OWA54337.1, OWA54338.1, OWA54339.1	XP_055329190.1	GAV01941.1
OG0000203	g13005.t1	OQV16788.1, OQV23329.1, OWA51384.1	XP_055327165.1, XP_055327170.1, XP_055332332.1, XP_055332400.1, XP_055340990.1, XP_055343762.1, XP_055343763.1, XP_055343771.1, XP_055343940.1, XP_055343953.1, XP_055344246.1, XP_055352538.1, XP_055354733.1, XP_055354734.1, XP_055354984.1, XP_055354985.1, XP_055354997.1, XP_055355802.1, XP_055356373.1, XP_055356643.1, XP_055356701.1, XP_055357963.1	GAU91635.1, GAU95493.1
OG0000204	g10153.t1, g10681.t1, g10684.t1, g11425.t1, g12322.t1, g12909.t1, g14656.t1, g15084.t1, g15159.t1, g15505.t1, g15575.t1, g219.t1, g2499.t1, g2786.t1, g3055.t1, g311.t1, g377.t1, g504.t1, g5171.t1, g5363.t1, g5435.t1, g5463.t1, g7596.t1, g8043.t1, g8195.t1, g820.t1, g8351.t1, g9436.t1
OG0000205	g11827.t1, g11828.t1, g11829.t1, g13556.t1	OQV14575.1, OQV15219.1, OQV15854.1, OQV15855.1, OQV15856.1, OQV15857.1, OQV15858.1, OQV15859.1, OQV15860.1, OQV15861.1, OQV15864.1, OQV17278.1, OWA51244.1, OWA51245.1, OWA52480.1, OWA53526.1	XP_055331313.1	GAV05746.1, GAV07057.1, GAV07058.1, GAV07059.1, GAV07060.1, GAV07061.1, GAV07062.1
OG0000206		OQV14221.1, OQV21475.1		GAU90296.1, GAU90297.1, GAU90298.1, GAU90300.1, GAU90301.1, GAU90302.1, GAU90303.1, GAU90304.1, GAU90306.1, GAU90307.1, GAU90308.1, GAU90310.1, GAU90312.1, GAU90313.1, GAU90315.1, GAU95937.1, GAU95938.1, GAU95939.1, GAU95940.1, GAU96171.1, GAU99135.1, GAU99136.1, GAU99138.1, GAU99139.1, GAV02725.1, GAV02726.1
OG0000207		OQV24916.1	XP_055329576.1, XP_055329577.1, XP_055329578.1, XP_055329644.1, XP_055329645.1, XP_055329646.1, XP_055329694.1, XP_055329695.1, XP_055329696.1, XP_055329707.1, XP_055329708.1, XP_055329827.1, XP_055336399.1, XP_055336400.1, XP_055336401.1, XP_055336402.1, XP_055336403.1, XP_055336405.1, XP_055344003.1, XP_055344017.1, XP_055344018.1, XP_055344019.1, XP_055344020.1, XP_055344021.1, XP_055355620.1,…	GAV04002.1
OG0000208			XP_055330642.1, XP_055330643.1, XP_055332419.1, XP_055332420.1, XP_055332511.1, XP_055338419.1, XP_055338449.1, XP_055339243.1, XP_055340772.1, XP_055342323.1, XP_055344570.1, XP_055344571.1, XP_055344572.1, XP_055344593.1, XP_055344594.1, XP_055346523.1, XP_055346968.1, XP_055346979.1, XP_055348582.1, XP_055348583.1, XP_055348584.1, XP_055348585.1, XP_055349035.1, XP_055350181.1, XP_055350808.1,…
OG0000209			XP_055340686.1, XP_055340687.1, XP_055345332.1, XP_055345341.1, XP_055345342.1, XP_055345376.1, XP_055345384.1, XP_055345385.1, XP_055345400.1, XP_055345405.1, XP_055349282.1, XP_055349283.1, XP_055349284.1, XP_055349285.1, XP_055349291.1, XP_055349297.1, XP_055350709.1, XP_055350711.1, XP_055350741.1, XP_055350742.1, XP_055350744.1, XP_055350745.1, XP_055350747.1, XP_055350748.1, XP_055350754.1,…
OG0000210	g10299.t1, g1090.t1, g11920.t1, g12276.t1, g13649.t1, g13963.t1, g14099.t1, g14649.t1, g14912.t1, g222.t1, g2645.t1, g2732.t1, g2733.t1, g2894.t1, g2993.t1, g3029.t1, g3885.t1, g506.t1, g507.t1, g516.t1, g530.t1, g7910.t1, g8186.t1, g8703.t1, g8704.t1			GAU91135.1, GAV01659.1
OG0000211	g9414.t1			GAU89630.1, GAU89706.1, GAU89779.1, GAU89780.1, GAU90782.1, GAU90783.1, GAU92137.1, GAU92333.1, GAU94633.1, GAU95091.1, GAU95135.1, GAU95610.1, GAU97419.1, GAU99612.1, GAV05099.1, GAV05100.1, GAV05291.1, GAV05509.1, GAV05510.1, GAV06109.1, GAV06701.1, GAV07384.1, GAV07447.1, GAV07448.1, GAV07449.1, GAV08019.1
OG0000212	g10466.t1, g10902.t1, g11234.t1, g11235.t1, g11238.t1, g11239.t1, g12399.t1, g12400.t1, g12724.t1, g12725.t1, g12726.t1, g14459.t1, g14460.t1, g14462.t1, g14463.t1, g14479.t1, g236.t1, g294.t1, g3996.t1, g3997.t1, g733.t1, g8434.t1	OQV15028.1, OQV15033.1, OQV15042.1, OWA50956.1		GAU97281.1
OG0000213	g11842.t1	OQV16157.1, OQV19504.1, OQV19513.1, OQV19516.1, OQV22653.1, OQV23664.1, OWA51701.1, OWA52474.1, OWA52516.1	XP_055331122.1, XP_055336192.1, XP_055343929.1, XP_055344934.1, XP_055346198.1, XP_055347107.1, XP_055352033.1, XP_055352037.1, XP_055354879.1, XP_055355170.1, XP_055355171.1, XP_055355172.1, XP_055355173.1, XP_055355174.1, XP_055355176.1, XP_055355183.1, XP_055355192.1
OG0000214	g10904.t1, g11043.t1, g12393.t1, g13132.t1, g13133.t1, g14322.t1, g14322.t2, g14710.t1, g15742.t1, g4191.t1, g4235.t1, g4236.t1, g4238.t1, g4248.t1, g6712.t1, g7660.t1, g7661.t1, g7662.t1, g7663.t1, g7664.t1, g7665.t1, g7666.t1, g7673.t1	OWA53289.1	XP_055328805.1, XP_055344538.1, XP_055354012.1
OG0000215	g10265.t1, g10530.t1, g11779.t1, g13853.t1, g14039.t1, g14469.t1, g14470.t1, g14617.t1, g14618.t1, g15432.t1, g15653.t1, g1584.t1, g2330.t1, g2340.t1, g2342.t1, g2343.t1, g235.t1, g3033.t1, g3816.t1, g4585.t1, g5214.t1, g6436.t1, g6511.t1, g7693.t1, g9280.t1, g9417.t1, g9983.t1
OG0000216	g11285.t1, g12510.t1, g12698.t1, g13517.t1, g14452.t1, g14464.t1, g14796.t1, g1515.t1, g1531.t1, g15435.t1, g15772.t1, g15775.t1, g3232.t1, g3597.t1, g3627.t1, g6222.t1, g7197.t1, g7251.t1, g7252.t1, g7254.t1, g8250.t1, g8830.t1, g8831.t1, g8832.t1, g9076.t1	OQV24550.1	XP_055348848.1
OG0000217	g10546.t1, g10547.t1, g11663.t1, g1223.t1, g14327.t1, g15085.t1, g15087.t1, g1764.t1, g2206.t1, g2207.t1, g2493.t1, g2495.t1, g381.t1, g4331.t1, g6788.t1, g7448.t1, g780.t1, g7894.t1, g810.t1, g813.t1, g9038.t1, g9041.t1, g9042.t1, g930.t1, g9477.t1, g9790.t1, g9791.t1
OG0000218	g10672.t1, g10675.t1, g11136.t1, g11137.t1, g11138.t1, g12270.t1, g15171.t1, g15597.t1, g1724.t1, g3172.t1, g3173.t1, g35.t1, g391.t1, g4535.t1, g4613.t1, g4715.t1, g645.t1, g7792.t1, g806.t1, g807.t1, g812.t1, g8353.t1, g8940.t1	OQV21876.1, OQV21877.1	XP_055344725.1, XP_055344741.1
OG0000219	g11770.t1, g12305.t1, g12306.t1, g12742.t1, g12743.t1, g12744.t1, g12745.t1, g12745.t2, g13492.t1, g2400.t1, g4960.t1, g4961.t1, g7949.t1	OQV19031.1, OQV19035.1, OQV19036.1	XP_055339432.1, XP_055339433.1, XP_055339434.1, XP_055345655.1, XP_055345668.1, XP_055346933.1, XP_055346941.1	GAV06323.1, GAV06324.1, GAV06382.1, GAV06383.1
OG0000220	g5329.t1	OQV15044.1, OQV15045.1, OQV15457.1, OQV15458.1, OQV15459.1, OQV15496.1, OQV15497.1, OQV18147.1, OQV18836.1, OQV19447.1, OQV25904.1, OQV25933.1, OWA52123.1		GAU91319.1, GAU93511.1, GAU93512.1, GAU93513.1, GAU93514.1, GAU97528.1, GAU99518.1, GAV01980.1, GAV04048.1, GAV05062.1, GAV07920.1, GAV09234.1, GAV09996.1
OG0000221	g14139.t1	OQV12127.1, OQV13732.1, OQV14454.1, OQV14455.1, OQV14457.1, OQV14458.1, OQV14459.1, OQV16374.1, OQV16498.1, OQV16499.1, OQV17977.1, OQV18738.1, OQV19701.1, OQV19703.1, OQV19705.1, OQV19706.1, OQV19707.1, OQV19710.1, OQV19711.1, OQV19712.1, OWA50834.1	XP_055327710.1, XP_055327711.1, XP_055349531.1	GAV00745.1, GAV08599.1
OG0000222		OQV19957.1, OQV21498.1, OQV21499.1, OQV24151.1, OQV24156.1, OWA49801.1, OWA49802.1, OWA49803.1, OWA49804.1, OWA50587.1, OWA51397.1, OWA51398.1, OWA51402.1, OWA51404.1, OWA52919.1, OWA52920.1, OWA52921.1, OWA52922.1, OWA52924.1, OWA54411.1, OWA54413.1, OWA54414.1, OWA54433.1, OWA55018.1, OWA55020.1	XP_055338557.1, XP_055351577.1
OG0000223		OQV21740.1		GAU87745.1, GAU90012.1, GAU90605.1, GAU90606.1, GAU90865.1, GAU96741.1, GAU96788.1, GAU96789.1, GAU96805.1, GAU97295.1, GAU99929.1, GAU99998.1, GAU99999.1, GAV00190.1, GAV00499.1, GAV00513.1, GAV00649.1, GAV07360.1, GAV07424.1, GAV07507.1, GAV07508.1, GAV07916.1, GAV07917.1, GAV08248.1, GAV08249.1, GAV08434.1
OG0000224			XP_055327328.1, XP_055327336.1, XP_055329871.1, XP_055329874.1, XP_055330504.1, XP_055336582.1, XP_055336724.1, XP_055336725.1, XP_055336727.1, XP_055340972.1, XP_055340973.1, XP_055342669.1, XP_055342671.1, XP_055344558.1, XP_055344974.1, XP_055344975.1, XP_055344976.1, XP_055345348.1, XP_055347693.1, XP_055351719.1, XP_055351720.1, XP_055351721.1, XP_055353849.1, XP_055355821.1, XP_055355995.1,…
OG0000225	g11691.t1, g11856.t1, g11875.t1, g12197.t1, g12198.t1, g1335.t1, g13641.t1, g13688.t1, g13944.t1, g4550.t1, g4551.t1, g4655.t1, g4853.t1, g4898.t1, g500.t1, g5152.t1, g5809.t1, g7452.t1, g7453.t1, g7621.t1, g7622.t1, g8438.t1, g8578.t1	OQV24066.1	XP_055334059.1	GAU90410.1
OG0000226	g11042.t1, g111.t1, g11794.t1, g11895.t1, g12879.t1, g14042.t1, g14381.t1, g14944.t1, g15267.t1, g15513.t1, g15680.t1, g1951.t1, g2635.t1, g2638.t1, g2639.t1, g2641.t1, g2831.t1, g3352.t1, g369.t1, g4228.t1, g499.t1, g7585.t1, g8187.t1, g8261.t1, g9065.t1		XP_055337123.1
OG0000227	g10154.t1, g10670.t1, g11675.t1, g12277.t1, g12321.t1, g12910.t1, g14714.t1, g1722.t1, g2498.t1, g2785.t1, g376.t1, g380.t1, g5172.t1, g5217.t1, g5240.t1, g5436.t1, g5464.t1, g713.t1, g7461.t1, g7462.t1, g7597.t1, g761.t1, g7833.t1, g9435.t1			GAV09140.1, GAV09636.1
OG0000228	g12900.t1, g13872.t1, g3158.t1, g6900.t1, g6917.t1, g8755.t1, g9456.t1	OQV15164.1, OQV19736.1, OQV19763.1, OQV19923.1, OQV19924.1, OQV19925.1, OQV19926.1, OWA55386.1	XP_055340865.1, XP_055341960.1, XP_055345234.1, XP_055345235.1, XP_055348834.1, XP_055348885.1, XP_055351837.1, XP_055352871.1, XP_055354020.1, XP_055356170.1, XP_055356173.1
OG0000229	g10542.t1, g12881.t1, g12882.t1, g13297.t1, g13298.t1, g13299.t1, g13300.t1, g13300.t2, g1377.t1, g13799.t1, g13801.t1, g15494.t1, g15495.t1, g15519.t1, g2652.t1, g2816.t1, g5513.t1, g732.t1, g7625.t1, g7950.t1, g7951.t1	OQV22972.1	XP_055344115.1, XP_055346092.1, XP_055351153.1	GAV08173.1
OG0000230	g5944.t1	OQV13350.1, OQV13629.1, OQV15154.1, OQV15302.1, OQV15530.1, OQV18505.1, OQV19980.1, OQV24699.1, OQV25523.1, OWA51190.1, OWA51192.1, OWA51194.1, OWA52556.1, OWA54509.1, OWA54877.1, OWA54893.1, OWA54896.1	XP_055332520.1, XP_055354676.1, XP_055354687.1, XP_055354688.1, XP_055357428.1, XP_055357429.1	GAU95666.1, GAU99936.1
OG0000231	g10373.t1, g11854.t1, g15434.t1, g5502.t1, g5503.t1	OQV13304.1, OWA49975.1, OWA51655.1, OWA53414.1, OWA53415.1, OWA53417.1, OWA53418.1, OWA53419.1, OWA53420.1, OWA53421.1, OWA53424.1, OWA54223.1, OWA55453.1	XP_055343557.1, XP_055343558.1	GAV01254.1, GAV01255.1, GAV01256.1, GAV01257.1, GAV01312.1, GAV01444.1
OG0000232		OQV13620.1, OQV13621.1, OQV13622.1, OQV13633.1, OQV13672.1, OQV13673.1, OQV17054.1, OQV17055.1, OQV19538.1, OQV24819.1, OQV24820.1, OQV24821.1, OQV24822.1, OQV24823.1, OQV24826.1, OQV24829.1, OQV24833.1, OQV24834.1, OQV24835.1, OWA53032.1, OWA53033.1, OWA53034.1, OWA53943.1, OWA54973.1, OWA54975.1	XP_055347681.1
OG0000233		OQV24855.1	XP_055334235.1, XP_055339189.1, XP_055339262.1, XP_055340319.1, XP_055340321.1, XP_055340322.1, XP_055340323.1, XP_055340343.1, XP_055340367.1, XP_055340368.1, XP_055340373.1, XP_055340390.1, XP_055340394.1, XP_055340403.1, XP_055340422.1, XP_055340423.1, XP_055340495.1, XP_055340496.1, XP_055340497.1, XP_055340507.1, XP_055340514.1, XP_055344217.1, XP_055344433.1, XP_055344434.1, XP_055356291.1
OG0000234		OQV26242.1, OWA54281.1	XP_055327809.1, XP_055327810.1, XP_055327811.1, XP_055327812.1, XP_055333828.1, XP_055334989.1, XP_055335068.1, XP_055344225.1, XP_055349053.1, XP_055349956.1	GAU87359.1, GAU89210.1, GAU90901.1, GAU90902.1, GAU99242.1, GAU99245.1, GAV06223.1, GAV07002.1, GAV07415.1, GAV07416.1, GAV09484.1, GAV09485.1, GAV09771.1, GAV09772.1
OG0000235			XP_055328582.1, XP_055328617.1, XP_055329850.1, XP_055329878.1, XP_055330531.1, XP_055335003.1, XP_055335005.1, XP_055335007.1, XP_055335008.1, XP_055335031.1, XP_055335033.1, XP_055335034.1, XP_055335086.1, XP_055335088.1, XP_055345170.1, XP_055345173.1, XP_055345174.1, XP_055351600.1, XP_055351922.1, XP_055351923.1, XP_055351924.1, XP_055351925.1, XP_055355116.1, XP_055357053.1, XP_055357054.1,…
OG0000236			XP_055331226.1, XP_055334002.1, XP_055335275.1, XP_055335276.1, XP_055335277.1, XP_055335869.1, XP_055337260.1, XP_055337261.1, XP_055337262.1, XP_055337263.1, XP_055338030.1, XP_055338031.1, XP_055338623.1, XP_055338852.1, XP_055338853.1, XP_055341420.1, XP_055348383.1, XP_055349685.1, XP_055349686.1, XP_055349687.1, XP_055349688.1, XP_055351950.1, XP_055351951.1, XP_055351952.1, XP_055352492.1,…
OG0000237			XP_055332135.1, XP_055332138.1, XP_055332145.1, XP_055332146.1, XP_055332224.1, XP_055334161.1, XP_055334166.1, XP_055334167.1, XP_055334181.1, XP_055334182.1, XP_055334183.1, XP_055334233.1, XP_055334292.1, XP_055334293.1, XP_055334294.1, XP_055334326.1, XP_055334338.1, XP_055344035.1, XP_055347844.1, XP_055350775.1, XP_055351891.1, XP_055353958.1, XP_055353959.1, XP_055354721.1, XP_055356039.1,…
OG0000238			XP_055332289.1, XP_055332290.1, XP_055332293.1, XP_055332326.1, XP_055332367.1, XP_055332436.1, XP_055332439.1, XP_055332454.1, XP_055332455.1, XP_055332474.1, XP_055332576.1, XP_055333896.1, XP_055335803.1, XP_055335886.1, XP_055351516.1, XP_055351517.1, XP_055352335.1, XP_055352336.1, XP_055352337.1, XP_055352338.1, XP_055352339.1, XP_055352340.1, XP_055352341.1, XP_055352342.1, XP_055352358.1,…
OG0000239			XP_055334094.1, XP_055334108.1, XP_055334109.1, XP_055334113.1, XP_055334114.1, XP_055334125.1, XP_055334128.1, XP_055334129.1, XP_055334130.1, XP_055334131.1, XP_055334139.1, XP_055334171.1, XP_055334188.1, XP_055334196.1, XP_055334198.1, XP_055334204.1, XP_055334244.1, XP_055334245.1, XP_055334246.1, XP_055334250.1, XP_055334251.1, XP_055334261.1, XP_055334262.1, XP_055334263.1, XP_055334264.1,…
OG0000240			XP_055354937.1, XP_055354938.1, XP_055354939.1, XP_055354940.1, XP_055354941.1, XP_055354942.1, XP_055354943.1, XP_055354944.1, XP_055354945.1, XP_055354946.1, XP_055354947.1, XP_055354948.1, XP_055354978.1, XP_055355286.1, XP_055355287.1, XP_055355288.1, XP_055355290.1, XP_055355291.1, XP_055355292.1, XP_055355293.1, XP_055355294.1, XP_055355297.1, XP_055355299.1, XP_055356675.1, XP_055356676.1,…
OG0000241	g10976.t1, g11024.t1, g11025.t1, g11487.t1, g12212.t1, g13484.t1, g13485.t1, g13566.t1, g14646.t1, g15175.t1, g2430.t1, g2552.t1, g4554.t1, g4754.t1, g5638.t1, g5972.t1, g6142.t1, g6921.t1, g6922.t1, g6923.t1, g8980.t1, g9309.t1, g9329.t1, g9478.t1		XP_055337403.1
OG0000242	g11544.t1, g14630.t1, g1892.t1, g1893.t1, g6014.t1	OQV16607.1, OQV17877.1, OWA53155.1	XP_055335449.1, XP_055350395.1, XP_055357318.1	GAU87164.1, GAU90568.1, GAU90569.1, GAU94085.1, GAU94086.1, GAU96532.1, GAU97548.1, GAU97549.1, GAV06072.1, GAV08502.1, GAV08503.1, GAV08764.1, GAV08983.1, GAV09949.1
OG0000243	g12586.t1, g307.t1, g3528.t1, g3529.t1, g3786.t1, g3808.t1, g6294.t1, g8560.t1	OQV13612.1, OQV17022.1, OQV19497.1, OQV19498.1, OQV19499.1, OQV19500.1, OQV19501.1, OQV19502.1, OQV19503.1, OQV19510.1, OQV19511.1	XP_055336017.1, XP_055336026.1, XP_055336033.1	GAV09781.1, GAV09782.1, GAV09783.1
OG0000244		OQV12357.1, OQV12358.1, OQV17200.1, OQV17204.1, OQV17208.1, OQV22574.1, OQV23380.1, OQV23383.1, OQV23387.1, OQV23389.1, OQV23396.1, OQV23397.1, OQV23403.1, OQV24667.1, OQV25686.1, OQV25687.1, OWA51268.1, OWA54298.1, OWA55225.1	XP_055344204.1, XP_055344260.1, XP_055353477.1	GAV09842.1, GAV09843.1, GAV09844.1
OG0000245		OWA51056.1, OWA51057.1	XP_055329993.1, XP_055331542.1, XP_055331543.1, XP_055343602.1, XP_055350803.1, XP_055355081.1, XP_055356370.1	GAU88310.1, GAU88311.1, GAU88312.1, GAU88313.1, GAU99417.1, GAU99418.1, GAU99419.1, GAV00281.1, GAV00282.1, GAV03366.1, GAV03367.1, GAV03368.1, GAV03369.1, GAV06288.1, GAV06289.1, GAV09605.1
OG0000246			XP_055329903.1, XP_055332324.1, XP_055334340.1, XP_055335036.1, XP_055335037.1, XP_055335038.1, XP_055342062.1, XP_055345045.1, XP_055345091.1, XP_055346529.1, XP_055347974.1, XP_055347975.1, XP_055348007.1, XP_055351603.1, XP_055355966.1, XP_055355967.1, XP_055356793.1, XP_055356794.1, XP_055356795.1, XP_055357162.1, XP_055357163.1, XP_055357164.1, XP_055357165.1, XP_055357166.1, XP_055357167.1
OG0000247			XP_055330413.1, XP_055345048.1, XP_055345554.1, XP_055345565.1, XP_055345566.1, XP_055345589.1, XP_055345590.1, XP_055345591.1, XP_055345592.1, XP_055345593.1, XP_055345627.1, XP_055345628.1, XP_055345629.1, XP_055345630.1, XP_055345678.1, XP_055345681.1, XP_055345684.1, XP_055345685.1, XP_055345688.1, XP_055345716.1, XP_055347181.1, XP_055350256.1, XP_055352798.1, XP_055357161.1, XP_055357360.1
OG0000248			XP_055330835.1, XP_055333744.1, XP_055341957.1, XP_055342273.1, XP_055342274.1, XP_055342433.1, XP_055342496.1, XP_055342497.1, XP_055342498.1, XP_055342500.1, XP_055342501.1, XP_055342502.1, XP_055347675.1, XP_055347715.1, XP_055347723.1, XP_055347769.1, XP_055347780.1, XP_055349149.1, XP_055349591.1, XP_055349592.1, XP_055349593.1, XP_055349594.1, XP_055355921.1, XP_055355923.1, XP_055356989.1
OG0000249			XP_055331181.1, XP_055331182.1, XP_055331183.1, XP_055331184.1, XP_055331187.1, XP_055331230.1, XP_055332469.1, XP_055341056.1, XP_055341364.1, XP_055341366.1, XP_055341367.1, XP_055342006.1, XP_055347476.1, XP_055347605.1, XP_055347609.1, XP_055347614.1, XP_055348635.1, XP_055348636.1, XP_055348637.1, XP_055348638.1, XP_055348639.1, XP_055348640.1, XP_055350173.1, XP_055356878.1, XP_055356881.1
OG0000250			XP_055353681.1, XP_055353688.1, XP_055353700.1, XP_055353710.1, XP_055357354.1, XP_055357365.1, XP_055357372.1, XP_055357380.1, XP_055357386.1, XP_055357397.1, XP_055357405.1, XP_055357413.1, XP_055357421.1, XP_055357427.1, XP_055357434.1, XP_055357442.1, XP_055357590.1, XP_055357591.1, XP_055357592.1, XP_055357652.1, XP_055357735.1, XP_055357736.1, XP_055357737.1, XP_055357738.1, XP_055358017.1
OG0000251				GAU87425.1, GAU89152.1, GAU91172.1, GAU91173.1, GAU94576.1, GAU94807.1, GAU94862.1, GAU94863.1, GAU96332.1, GAU96333.1, GAV00346.1, GAV00347.1, GAV00350.1, GAV01482.1, GAV01572.1, GAV01586.1, GAV01876.1, GAV01877.1, GAV06174.1, GAV06175.1, GAV06828.1, GAV08649.1, GAV09336.1, GAV09581.1, GAV09761.1
OG0000252	g1373.t1, g1373.t2, g3940.t1, g6510.t1	OQV13877.1, OQV17121.1, OQV21851.1, OQV22050.1, OQV22595.1, OQV22597.1, OQV22598.1, OQV23533.1, OQV23534.1, OQV23535.1, OQV26219.1, OQV26220.1, OQV26234.1, OWA50488.1, OWA50822.1, OWA50823.1, OWA50830.1, OWA53291.1	XP_055331236.1	GAV06697.1
OG0000253	g12318.t1, g12375.t1, g12654.t1, g12907.t1, g13474.t1, g14075.t1, g14284.t1, g14654.t1, g15370.t1, g15493.t1, g2721.t1, g3088.t1, g3241.t1, g379.t1, g4838.t1, g5246.t1, g5509.t1, g7594.t1, g7854.t1, g9416.t1, g9854.t1		XP_055338440.1	GAV09143.1, GAV09631.1
OG0000254	g15098.t1, g8424.t1	OQV14828.1, OQV15924.1, OQV15925.1, OQV15926.1, OQV16154.1, OQV25284.1, OQV25285.1, OQV25286.1, OWA51925.1, OWA51927.1, OWA53824.1, OWA53826.1, OWA53827.1, OWA55009.1, OWA55013.1, OWA55107.1, OWA55689.1	XP_055331599.1, XP_055331600.1	GAU98025.1, GAV02284.1, GAV08723.1
OG0000255	g10813.t1, g14825.t1, g6982.t1, g745.t1, g8392.t1, g8947.t1	OQV22806.1, OQV22807.1, OQV23658.1, OQV23659.1, OQV23660.1, OQV23661.1, OQV23662.1, OQV23663.1, OQV23665.1, OQV23666.1	XP_055347531.1, XP_055347535.1, XP_055347536.1, XP_055347537.1, XP_055347556.1, XP_055357712.1, XP_055357713.1	GAU96609.1
OG0000256	g10300.t1, g10316.t1, g5495.t1, g5496.t1, g6595.t1, g7258.t1		XP_055346966.1	GAU89116.1, GAU89117.1, GAU89118.1, GAU89119.1, GAU89121.1, GAU89879.1, GAU90147.1, GAU90148.1, GAU95312.1, GAU95313.1, GAU95316.1, GAU95317.1, GAU95318.1, GAU95319.1, GAU95321.1, GAU95322.1, GAU95323.1
OG0000257	g10384.t1, g11539.t1, g13354.t1, g13385.t1, g15083.t1, g15215.t1, g15216.t1, g15582.t1, g15758.t1, g15759.t1, g15761.t1, g15763.t1, g15764.t1, g15766.t1, g15768.t1, g3112.t1, g5052.t1, g531.t1, g5419.t1, g6584.t1, g7009.t1, g8410.t1, g9805.t1, g9911.t1
OG0000258	g10460.t1, g10461.t1, g10462.t1, g1273.t1, g14713.t1, g194.t1, g7790.t1, g7937.t1, g7938.t1, g7940.t1	OWA54591.1, OWA54592.1	XP_055334986.1, XP_055350105.1	GAU89198.1, GAU89199.1, GAU89595.1, GAU89596.1, GAU89597.1, GAU99924.1, GAV00424.1, GAV01284.1, GAV06945.1, GAV06946.1
OG0000259		OWA54677.1	XP_055329571.1, XP_055329572.1, XP_055330528.1, XP_055338568.1, XP_055342333.1, XP_055344224.1, XP_055348126.1, XP_055349414.1, XP_055350098.1, XP_055351979.1	GAU88548.1, GAU89280.1, GAU89281.1, GAU89788.1, GAU91099.1, GAU93193.1, GAU93735.1, GAU93736.1, GAU94462.1, GAU94463.1, GAV08553.1, GAV08939.1, GAV08940.1
OG0000260			XP_055329864.1, XP_055340638.1, XP_055340639.1, XP_055340669.1, XP_055340740.1, XP_055340747.1, XP_055340749.1, XP_055340750.1, XP_055340754.1, XP_055340755.1, XP_055340758.1, XP_055340768.1, XP_055340781.1, XP_055340783.1, XP_055341284.1, XP_055341285.1, XP_055341286.1, XP_055341288.1, XP_055341289.1, XP_055341318.1, XP_055341320.1, XP_055341321.1, XP_055341360.1, XP_055341361.1
OG0000261			XP_055329971.1, XP_055331634.1, XP_055331635.1, XP_055331636.1, XP_055331637.1, XP_055331638.1, XP_055348232.1, XP_055349927.1, XP_055350383.1, XP_055350384.1, XP_055350385.1, XP_055350386.1, XP_055350387.1, XP_055350389.1, XP_055351165.1, XP_055353036.1, XP_055353037.1, XP_055353939.1, XP_055355141.1, XP_055355151.1, XP_055355152.1, XP_055357292.1, XP_055357294.1, XP_055357295.1
OG0000262				GAU87246.1, GAU87247.1, GAU87248.1, GAU87272.1, GAU87273.1, GAU89197.1, GAU89204.1, GAU89284.1, GAU89285.1, GAU89286.1, GAU89583.1, GAU89584.1, GAU89898.1, GAU90399.1, GAU90400.1, GAU90563.1, GAU91360.1, GAU91362.1, GAU99297.1, GAU99298.1, GAV06911.1, GAV06912.1, GAV07038.1
OG0000263	g11561.t1	OQV12545.1, OQV14453.1, OQV23274.1, OWA50402.1, OWA50403.1, OWA55105.1	XP_055342980.1, XP_055347154.1, XP_055347155.1, XP_055347212.1, XP_055349776.1, XP_055353268.1, XP_055355045.1	GAU89638.1, GAU90683.1, GAU91533.1, GAU91573.1, GAU91607.1, GAV00323.1, GAV04167.1, GAV10039.1, GAV10040.1
OG0000264	g14263.t1, g14993.t1, g1717.t1	OQV13655.1, OQV25517.1, OQV25518.1		GAU89575.1, GAU90104.1, GAU92381.1, GAU94424.1, GAU94425.1, GAU94426.1, GAU94427.1, GAU97078.1, GAV03057.1, GAV03780.1, GAV04828.1, GAV04869.1, GAV04872.1, GAV06122.1, GAV06353.1, GAV08172.1, GAV09881.1
OG0000265	g15368.t1, g5557.t1, g6908.t1, g7939.t1	OQV12657.1, OQV12917.1, OQV12920.1, OQV12921.1, OQV12922.1, OQV16927.1, OQV24970.1, OQV24972.1, OQV24976.1, OQV24977.1	XP_055330757.1, XP_055330759.1, XP_055337431.1, XP_055337501.1	GAU91616.1, GAU92850.1, GAU92852.1, GAV06660.1, GAV06661.1
OG0000266	g10347.t1, g12024.t1, g13788.t1, g15735.t1, g5470.t1, g9441.t1, g9795.t1, g9817.t1	OQV15000.1, OQV15016.1, OQV18387.1	XP_055340866.1, XP_055340867.1, XP_055344311.1, XP_055347264.1, XP_055347298.1, XP_055348005.1, XP_055350683.1, XP_055351830.1, XP_055351834.1, XP_055351841.1, XP_055351842.1	GAV06145.1
OG0000267	g1826.t1	OQV11776.1, OQV12294.1, OQV12320.1, OQV15259.1, OQV15260.1, OQV15435.1, OQV15436.1, OQV17065.1, OQV17068.1, OQV17933.1, OQV17934.1, OQV17935.1, OQV17936.1, OQV18893.1, OQV18898.1, OQV18899.1, OQV23377.1, OWA49825.1, OWA50058.1, OWA50154.1, OWA50330.1, OWA50332.1
OG0000268	g1242.t1, g5260.t1	OQV12890.1, OQV12891.1, OQV12892.1, OQV12894.1, OQV12895.1, OQV12897.1, OQV12898.1, OQV12899.1, OQV12918.1, OQV12919.1, OQV13611.1, OQV17624.1, OQV17625.1, OQV17901.1, OQV20628.1, OQV20658.1, OQV22822.1	XP_055331052.1, XP_055331238.1, XP_055347530.1	GAV04498.1
OG0000269		OQV12404.1, OQV17922.1, OQV17924.1, OQV20321.1, OQV20748.1, OQV20754.1, OQV20755.1, OQV21000.1, OQV21001.1, OQV21869.1, OQV21870.1, OQV21874.1, OQV21875.1, OQV25011.1, OWA50750.1, OWA51119.1, OWA52912.1, OWA53524.1, OWA54173.1, OWA54177.1, OWA55658.1	XP_055337970.1, XP_055337971.1
OG0000270			XP_055328912.1, XP_055328915.1, XP_055328922.1, XP_055328942.1, XP_055328943.1, XP_055328944.1, XP_055328946.1, XP_055328951.1, XP_055328985.1, XP_055329170.1, XP_055329171.1, XP_055329247.1, XP_055329256.1, XP_055329257.1, XP_055332983.1, XP_055342097.1, XP_055345338.1, XP_055345339.1, XP_055345340.1, XP_055354665.1, XP_055354666.1, XP_055354667.1, XP_055354668.1
OG0000271			XP_055329990.1, XP_055330444.1, XP_055330480.1, XP_055330732.1, XP_055330733.1, XP_055330734.1, XP_055344400.1, XP_055344419.1, XP_055345165.1, XP_055346542.1, XP_055347663.1, XP_055347665.1, XP_055347690.1, XP_055347725.1, XP_055347726.1, XP_055350089.1, XP_055350096.1, XP_055350104.1, XP_055350109.1, XP_055350118.1, XP_055350130.1, XP_055356863.1, XP_055357218.1
OG0000272			XP_055332313.1, XP_055332502.1, XP_055332553.1, XP_055340610.1, XP_055340611.1, XP_055340667.1, XP_055340672.1, XP_055340688.1, XP_055340696.1, XP_055340733.1, XP_055340791.1, XP_055340792.1, XP_055342494.1, XP_055342495.1, XP_055355624.1, XP_055355625.1, XP_055355628.1, XP_055355629.1, XP_055355630.1, XP_055355633.1, XP_055355641.1, XP_055355642.1, XP_055356602.1
OG0000273			XP_055336116.1, XP_055336117.1, XP_055336118.1, XP_055336119.1, XP_055336121.1, XP_055336122.1, XP_055336123.1, XP_055336124.1, XP_055336125.1, XP_055336126.1, XP_055336127.1, XP_055336128.1, XP_055336129.1, XP_055336130.1, XP_055336132.1, XP_055336133.1, XP_055357011.1, XP_055357012.1, XP_055357013.1, XP_055357014.1, XP_055357015.1, XP_055357016.1, XP_055357017.1
OG0000274			XP_055336754.1, XP_055339219.1, XP_055340292.1, XP_055344519.1, XP_055344520.1, XP_055344521.1, XP_055344523.1, XP_055344524.1, XP_055344568.1, XP_055344586.1, XP_055344587.1, XP_055344766.1, XP_055344767.1, XP_055351112.1, XP_055351113.1, XP_055351114.1, XP_055351115.1, XP_055351116.1, XP_055351126.1, XP_055352327.1, XP_055356292.1, XP_055356294.1, XP_055357693.1
OG0000275	g10293.t1, g10295.t1, g11251.t1, g11289.t1, g11426.t1, g13857.t1, g1391.t1, g14414.t1, g14704.t1, g15088.t1, g15760.t1, g1586.t1, g2352.t1, g3599.t1, g3995.t1, g5946.t1, g8554.t1, g8849.t1, g8850.t1, g9476.t1		XP_055353992.1, XP_055353993.1
OG0000276	g1065.t1, g12729.t1, g12992.t1, g1381.t1, g1382.t1, g15281.t1, g1851.t1, g2507.t1, g2808.t1, g3881.t1, g4344.t1, g5239.t1, g5244.t1, g5468.t1, g6587.t1, g6589.t1, g7629.t1, g7798.t1, g9.t1, g9026.t1, g9029.t1, g9032.t1
OG0000277		OQV14368.1, OQV16724.1, OQV16725.1, OQV17413.1, OQV21979.1, OWA50509.1, OWA50597.1, OWA52343.1, OWA53014.1, OWA54533.1, OWA54534.1, OWA54535.1, OWA54604.1, OWA54605.1, OWA55098.1, OWA55162.1, OWA55163.1, OWA55234.1, OWA55235.1, OWA55302.1, OWA55413.1, OWA55514.1
OG0000278	g13533.t1, g13536.t1, g14411.t1, g15003.t1, g15004.t1, g15005.t1, g15006.t1, g2807.t1, g6699.t1, g706.t1, g7721.t1, g7722.t1, g9265.t1, g9513.t1		XP_055344823.1, XP_055344824.1, XP_055344826.1, XP_055344827.1, XP_055344831.1, XP_055344832.1	GAU99328.1, GAV06255.1
OG0000279				GAU88623.1, GAU88624.1, GAU89386.1, GAU91704.1, GAU93014.1, GAU94175.1, GAU94704.1, GAU94709.1, GAU95524.1, GAU95525.1, GAU99365.1, GAU99366.1, GAU99367.1, GAV01733.1, GAV06418.1, GAV06419.1, GAV06955.1, GAV06956.1, GAV07123.1, GAV07124.1, GAV07450.1, GAV08018.1
OG0000280	g10077.t1, g11131.t1, g1280.t1, g13402.t1, g13405.t1, g13775.t1, g1468.t1, g2454.t1, g4785.t1, g5423.t1, g5454.t1, g6680.t1, g6796.t1, g6814.t1, g8225.t1	OQV20781.1, OQV20786.1	XP_055327356.1	GAV01473.1, GAV01474.1, GAV01475.1, GAV09835.1
OG0000281	g10390.t1, g11165.t1, g11809.t1, g12712.t1, g14321.t1, g15722.t1, g1906.t1, g397.t1, g4859.t1, g631.t1, g632.t1, g9260.t1, g972.t1	OQV11978.1, OQV13638.1, OQV21937.1, OQV22051.1, OQV22052.1, OQV22579.1, OWA53805.1	XP_055351961.1	GAU94976.1
OG0000282		OQV11402.1, OQV11459.1, OQV15463.1, OQV15464.1, OQV15810.1, OQV16605.1, OQV16606.1, OQV19318.1, OQV19319.1, OQV20803.1, OQV21936.1, OQV22089.1, OQV24131.1, OQV25991.1, OWA50234.1, OWA51882.1, OWA53139.1, OWA53202.1, OWA54086.1, OWA54814.1, OWA54938.1, OWA55431.1
OG0000283	g1074.t1, g15155.t1, g15390.t1, g15438.t1, g15439.t1, g15535.t1, g2731.t1, g2893.t1, g2994.t1, g302.t1, g3123.t1, g3412.t1, g4945.t1, g508.t1, g517.t1, g5489.t1, g6217.t1, g8112.t1, g9299.t1, g9312.t1, g9802.t1	OQV13572.1
OG0000284	g10291.t1, g11065.t1, g13392.t1, g1358.t1		XP_055328968.1, XP_055328969.1, XP_055328970.1, XP_055328971.1, XP_055328972.1, XP_055328973.1, XP_055330436.1, XP_055340876.1, XP_055346082.1, XP_055346083.1, XP_055346084.1, XP_055346117.1, XP_055346194.1, XP_055346213.1, XP_055352048.1, XP_055352049.1	GAU97253.1, GAU97254.1
OG0000285	g11443.t1, g11446.t1, g14816.t1, g3339.t1, g3341.t1, g4563.t1, g7708.t1, g7709.t1	OQV16378.1, OQV16379.1, OQV16381.1, OQV26158.1		GAU92711.1, GAU92755.1, GAU92757.1, GAU92761.1, GAU92762.1, GAU92763.1, GAU92764.1, GAU92765.1, GAV06073.1, GAV09779.1
OG0000286	g11298.t1, g11298.t2, g12213.t1, g12897.t1, g12899.t1, g13012.t1, g14592.t1, g14594.t1, g14596.t1, g3003.t1, g6020.t1, g6499.t1, g6500.t1, g6752.t1, g6758.t1, g703.t1, g704.t1, g9979.t1, g9981.t1, g9982.t1		XP_055346193.1	GAU96381.1
OG0000287	g10966.t1, g10967.t1, g10968.t1, g10969.t1, g11050.t1, g12025.t1, g12603.t1, g12913.t1, g14061.t1, g14609.t1, g15751.t1, g15752.t1, g1928.t1, g2991.t1, g3800.t1, g547.t1, g552.t1, g6703.t1, g6706.t1, g7432.t1, g7895.t1, g8595.t1
OG0000288	g10119.t1, g10120.t1, g4194.t1	OQV11784.1, OQV14319.1, OQV14321.1, OQV19322.1, OQV19323.1, OQV22000.1, OQV22001.1, OQV22779.1, OQV22780.1, OQV22781.1, OWA52385.1, OWA52386.1, OWA53208.1, OWA53597.1, OWA54876.1	XP_055340601.1, XP_055350657.1, XP_055350658.1	GAV02849.1
OG0000289	g12461.t1	OQV11588.1, OQV11590.1, OQV11592.1, OQV11599.1, OQV11613.1, OQV19431.1, OQV23379.1, OWA50375.1, OWA50378.1, OWA50387.1, OWA51420.1, OWA53751.1, OWA54721.1, OWA54728.1, OWA54803.1	XP_055341686.1, XP_055341696.1, XP_055347553.1, XP_055347554.1	GAV00009.1, GAV07050.1
OG0000290	g15538.t1, g15540.t1, g15548.t1, g15549.t1, g15550.t1, g15551.t1, g15557.t1, g15558.t1, g15560.t1	OQV17306.1, OQV17307.1, OQV25582.1, OWA51222.1, OWA51476.1	XP_055346599.1, XP_055352512.1, XP_055352893.1	GAU89242.1, GAU91957.1, GAU96611.1, GAV09365.1, GAV09442.1
OG0000291	g12808.t1, g15724.t1, g9807.t1	OQV22911.1, OWA49833.1, OWA52361.1, OWA52362.1, OWA52364.1, OWA52784.1	XP_055332316.1, XP_055351763.1, XP_055351773.1, XP_055351786.1, XP_055356488.1	GAU89593.1, GAU91992.1, GAU92210.1, GAU92403.1, GAU92596.1, GAU92598.1, GAU94458.1, GAU94770.1
OG0000292	g4796.t1	OQV17217.1, OQV21841.1, OQV23453.1, OQV23454.1, OQV23455.1, OQV23456.1, OQV23457.1, OQV23458.1, OQV23459.1, OQV23476.1, OWA50364.1, OWA52535.1, OWA52536.1, OWA52537.1, OWA52541.1, OWA53963.1, OWA54454.1, OWA54456.1	XP_055352171.1, XP_055352172.1	GAV09402.1
OG0000293	g15234.t1	OQV14259.1, OQV18031.1, OQV18032.1, OQV20626.1, OQV24578.1, OWA50168.1, OWA54986.1	XP_055333983.1, XP_055334052.1, XP_055346260.1, XP_055346359.1, XP_055346394.1, XP_055346395.1, XP_055349427.1, XP_055351302.1	GAU87589.1, GAU92758.1, GAV00302.1, GAV09823.1, GAV09824.1, GAV09825.1
OG0000294			XP_055329744.1, XP_055330500.1, XP_055330976.1, XP_055330977.1, XP_055330978.1, XP_055330979.1, XP_055330980.1, XP_055330981.1, XP_055330982.1, XP_055330983.1, XP_055331008.1, XP_055331009.1, XP_055331011.1, XP_055331012.1, XP_055334904.1, XP_055334905.1, XP_055339957.1, XP_055339958.1, XP_055347984.1, XP_055354447.1, XP_055355167.1, XP_055355169.1
OG0000295			XP_055329800.1, XP_055329805.1, XP_055329806.1, XP_055329858.1, XP_055329875.1, XP_055330146.1, XP_055330147.1, XP_055330148.1, XP_055330150.1, XP_055330362.1, XP_055330363.1, XP_055335723.1, XP_055335724.1, XP_055335754.1, XP_055335755.1, XP_055335756.1, XP_055335873.1, XP_055340889.1, XP_055340890.1, XP_055356379.1, XP_055356380.1, XP_055356601.1
OG0000296			XP_055331046.1, XP_055340345.1, XP_055340405.1, XP_055340406.1, XP_055340440.1, XP_055340441.1, XP_055340442.1, XP_055340444.1, XP_055340714.1, XP_055345116.1, XP_055346085.1, XP_055346086.1, XP_055348629.1, XP_055349968.1, XP_055349969.1, XP_055351847.1, XP_055356105.1, XP_055356120.1, XP_055356124.1, XP_055356478.1, XP_055356479.1, XP_055356995.1
OG0000297			XP_055335006.1, XP_055339314.1, XP_055339315.1, XP_055347948.1, XP_055347949.1, XP_055348923.1, XP_055348937.1, XP_055350237.1, XP_055350239.1, XP_055350240.1, XP_055350865.1, XP_055350866.1, XP_055350867.1, XP_055350868.1, XP_055350917.1, XP_055350918.1, XP_055351304.1, XP_055351764.1, XP_055354738.1, XP_055354741.1, XP_055356414.1, XP_055356415.1
OG0000298			XP_055342359.1, XP_055344919.1, XP_055344920.1, XP_055345069.1, XP_055347204.1, XP_055347235.1, XP_055347295.1, XP_055347296.1, XP_055352296.1, XP_055352298.1, XP_055352299.1, XP_055352300.1, XP_055352301.1, XP_055352302.1, XP_055352303.1, XP_055352304.1, XP_055352314.1, XP_055352315.1, XP_055356121.1, XP_055356285.1, XP_055356286.1, XP_055356287.1
OG0000299			XP_055357193.1	GAU88104.1, GAU88119.1, GAU88120.1, GAU88121.1, GAU94095.1, GAU94115.1, GAU96509.1, GAU96510.1, GAU99432.1, GAV00335.1, GAV01950.1, GAV03827.1, GAV03913.1, GAV04132.1, GAV04134.1, GAV04135.1, GAV04977.1, GAV05382.1, GAV05384.1, GAV07515.1, GAV07516.1
OG0000300				GAU88555.1, GAU89347.1, GAU89348.1, GAU89349.1, GAU89350.1, GAU89351.1, GAU89352.1, GAU89355.1, GAU89356.1, GAU89357.1, GAU89358.1, GAU89359.1, GAU89360.1, GAU89362.1, GAU89970.1, GAU90411.1, GAU92441.1, GAU92442.1, GAU92443.1, GAV01691.1, GAV05162.1, GAV05163.1
OG0000301	g10540.t1, g11291.t1, g11552.t1, g11999.t1, g12206.t1, g12531.t1, g12531.t2, g1274.t1, g13024.t1, g14667.t1, g14667.t2, g14776.t1, g15152.t1, g3056.t1, g312.t1, g501.t1, g6697.t1, g6700.t1, g705.t1, g7880.t1, g9659.t1
OG0000302		OQV11582.1, OQV13619.1, OQV14194.1, OQV14338.1, OQV15759.1, OQV19745.1, OQV19774.1, OQV19991.1, OQV19992.1, OQV19995.1, OQV19998.1, OQV20001.1, OQV20017.1, OQV20400.1, OQV22968.1, OQV24982.1, OWA50700.1, OWA53134.1, OWA53435.1, OWA54727.1, OWA55680.1
OG0000303	g10799.t1	OQV12934.1, OQV13563.1, OQV20644.1, OQV23335.1, OQV23625.1, OQV23808.1, OWA50171.1, OWA50863.1, OWA50865.1, OWA50866.1, OWA50867.1, OWA50869.1, OWA51438.1, OWA51981.1, OWA54906.1, OWA54907.1, OWA54908.1	XP_055333848.1	GAU89994.1, GAV01136.1
OG0000304	g10797.t1, g3809.t1	OQV11476.1, OQV13080.1, OQV18420.1, OQV22756.1, OQV24150.1, OQV25472.1, OQV25473.1, OQV25509.1, OWA49924.1, OWA52597.1, OWA52605.1, OWA52606.1, OWA52607.1, OWA52610.1, OWA52611.1, OWA52612.1, OWA54325.1, OWA54326.1, OWA54434.1
OG0000305	g11125.t1, g1281.t1, g13403.t1, g1469.t1, g2393.t1, g5424.t1, g6797.t1, g8226.t1	OQV15367.1, OQV19008.1, OQV19507.1, OQV19508.1, OQV19509.1, OQV19518.1, OQV19519.1, OQV19521.1, OQV19793.1, OQV20782.1, OWA51336.1, OWA53693.1		GAV09833.1
OG0000306	g10686.t1, g11240.t1, g11800.t1, g11802.t1, g11803.t1, g11805.t1, g11806.t1, g1526.t1, g1528.t1, g316.t1, g546.t1, g5770.t1, g9045.t1	OQV16219.1	XP_055330764.1, XP_055330780.1, XP_055330781.1	GAU88139.1, GAU88140.1, GAU88141.1, GAU89143.1
OG0000307	g2229.t1, g442.t1	OQV13583.1, OQV14608.1, OQV15001.1, OQV15009.1, OQV15013.1, OQV20260.1, OWA54750.1, OWA55022.1	XP_055350766.1, XP_055350768.1, XP_055350769.1, XP_055350770.1, XP_055350771.1, XP_055350772.1, XP_055350780.1, XP_055355634.1, XP_055356713.1	GAU92351.1, GAV00553.1
OG0000308	g11028.t1, g11671.t1, g11672.t1, g11674.t1, g2418.t1, g2424.t1, g2429.t1, g2443.t1, g2444.t1, g2450.t1, g2526.t1, g292.t1, g3911.t1, g40.t1, g41.t1, g43.t1, g43.t2, g4531.t1, g5780.t1, g6216.t1		XP_055334970.1
OG0000309	g13381.t1, g4762.t1, g6740.t1, g6741.t1, g6742.t1, g6749.t1, g8605.t1	OQV15380.1, OQV15381.1, OQV19867.1, OQV19868.1, OQV24121.1, OWA50365.1	XP_055341954.1, XP_055347891.1, XP_055351554.1, XP_055353591.1, XP_055356563.1, XP_055357378.1, XP_055357379.1	GAU95116.1
OG0000310	g12853.t1, g12853.t2, g741.t1, g741.t2, g741.t3, g748.t1	OQV24359.1, OQV24360.1, OQV24363.1, OQV24365.1, OWA50174.1, OWA54355.1, OWA54356.1, OWA54357.1	XP_055340543.1, XP_055340544.1, XP_055340545.1	GAV07912.1, GAV07913.1, GAV07914.1, GAV08437.1
OG0000311		OQV12411.1, OQV14735.1, OQV14736.1, OQV17737.1, OQV17739.1, OQV18797.1, OQV20560.1, OQV21892.1, OQV22552.1, OWA50169.1, OWA51694.1, OWA52104.1, OWA52115.1, OWA52120.1, OWA52291.1, OWA53162.1, OWA53290.1, OWA53561.1, OWA53851.1	XP_055333952.1	GAV04875.1
OG0000312		OQV14539.1, OQV14541.1, OQV14937.1, OQV14938.1, OQV16668.1, OQV17060.1, OQV24515.1, OWA53562.1, OWA55603.1, OWA55676.1	XP_055343086.1, XP_055345982.1, XP_055345983.1	GAU90261.1, GAU90262.1, GAU92600.1, GAU92609.1, GAU94236.1, GAU94237.1, GAV08427.1, GAV08679.1
OG0000313		OQV24201.1		GAU91399.1, GAU94798.1, GAU97049.1, GAU97201.1, GAU99931.1, GAV01193.1, GAV01264.1, GAV01319.1, GAV01886.1, GAV01887.1, GAV01889.1, GAV01891.1, GAV01892.1, GAV03689.1, GAV03690.1, GAV03726.1, GAV03734.1, GAV03735.1, GAV03879.1, GAV03987.1
OG0000314			XP_055330232.1, XP_055330233.1, XP_055330234.1, XP_055330235.1, XP_055330348.1, XP_055330349.1, XP_055330351.1, XP_055340879.1, XP_055340908.1, XP_055340991.1, XP_055344335.1, XP_055348868.1, XP_055351330.1, XP_055353850.1, XP_055353851.1, XP_055355563.1, XP_055355565.1, XP_055355567.1, XP_055355568.1, XP_055355569.1, XP_055357426.1
OG0000315			XP_055331903.1, XP_055331904.1, XP_055332197.1, XP_055336668.1, XP_055338416.1, XP_055338417.1, XP_055338518.1, XP_055338519.1, XP_055344752.1, XP_055347568.1, XP_055347976.1, XP_055347977.1, XP_055347978.1, XP_055347979.1, XP_055348370.1, XP_055349558.1, XP_055349642.1, XP_055350345.1, XP_055351548.1, XP_055356123.1, XP_055356131.1
OG0000316			XP_055340793.1, XP_055340794.1, XP_055340795.1, XP_055340796.1, XP_055340797.1, XP_055340799.1, XP_055340800.1, XP_055340801.1, XP_055340802.1, XP_055340803.1, XP_055340804.1, XP_055340805.1, XP_055340806.1, XP_055340807.1, XP_055340808.1, XP_055340809.1, XP_055340810.1, XP_055340811.1, XP_055340812.1, XP_055340813.1, XP_055340815.1
OG0000317			XP_055344588.1, XP_055344590.1, XP_055344601.1, XP_055346199.1, XP_055348179.1, XP_055348180.1, XP_055348181.1, XP_055348182.1, XP_055348183.1, XP_055348184.1, XP_055348185.1, XP_055348186.1, XP_055348187.1, XP_055348188.1, XP_055348189.1, XP_055348190.1, XP_055348206.1, XP_055348257.1, XP_055349669.1, XP_055350671.1, XP_055357673.1
OG0000318			XP_055348659.1, XP_055350119.1, XP_055350120.1, XP_055350121.1, XP_055350122.1, XP_055350123.1, XP_055350124.1, XP_055350125.1, XP_055350126.1, XP_055350127.1, XP_055350128.1, XP_055350131.1, XP_055350182.1, XP_055350183.1, XP_055350668.1, XP_055350669.1, XP_055353651.1, XP_055353912.1, XP_055353913.1, XP_055353914.1, XP_055357391.1
OG0000319			XP_055351871.1, XP_055353195.1, XP_055355411.1	GAU88329.1, GAU89749.1, GAU91500.1, GAU97704.1, GAU97705.1, GAU99368.1, GAU99369.1, GAV00305.1, GAV00306.1, GAV00310.1, GAV03103.1, GAV03882.1, GAV04955.1, GAV05036.1, GAV07918.1, GAV08756.1, GAV08757.1, GAV08758.1
OG0000320				GAU87546.1, GAU91391.1, GAU91392.1, GAU92151.1, GAU94952.1, GAU96996.1, GAV00038.1, GAV00040.1, GAV00041.1, GAV01304.1, GAV01305.1, GAV01306.1, GAV01358.1, GAV03883.1, GAV04957.1, GAV05094.1, GAV05098.1, GAV05101.1, GAV06363.1, GAV06938.1, GAV07065.1
OG0000321	g14324.t1	OQV11587.1, OQV11617.1, OQV11619.1, OQV13526.1, OQV16088.1, OQV16399.1, OQV17410.1, OQV18143.1, OQV25016.1, OQV25017.1, OQV26031.1, OWA51417.1, OWA52345.1, OWA53519.1, OWA53864.1, OWA54184.1, OWA54216.1, OWA54334.1, OWA55642.1
OG0000322	g14905.t1, g14905.t2, g3676.t1	OQV12256.1, OQV12258.1, OQV12261.1, OQV12262.1, OQV12263.1, OQV12265.1, OQV12266.1, OQV12268.1, OQV12270.1, OQV13898.1, OQV18934.1, OQV23018.1, OQV23021.1, OWA53707.1	XP_055349307.1, XP_055349308.1	GAU95874.1
OG0000323	g10911.t1, g11001.t1, g11096.t1, g11833.t1, g11834.t1, g11843.t1, g12427.t1, g13289.t1, g13290.t1, g13560.t1, g456.t1, g545.t1, g5951.t1, g6686.t1, g9517.t1, g9899.t1		XP_055357959.1, XP_055357960.1, XP_055357961.1	GAV06822.1
OG0000324	g13222.t1	OQV11661.1, OQV12060.1, OQV16703.1, OQV18592.1, OQV18593.1, OQV19427.1, OQV19723.1, OQV19724.1, OQV19920.1, OQV20978.1, OQV25657.1, OQV25663.1, OQV25672.1, OQV25673.1, OWA51418.1, OWA54994.1		GAU88672.1, GAU95593.1, GAU95716.1
OG0000325	g10155.t1, g11685.t1, g15158.t1, g7561.t1, g7881.t1, g8399.t1	OQV18423.1, OWA50353.1, OWA52198.1, OWA54840.1, OWA55403.1		GAU89441.1, GAU89442.1, GAU89444.1, GAU96875.1, GAU99816.1, GAU99817.1, GAV01387.1, GAV07373.1, GAV07374.1
OG0000326	g10920.t1, g10920.t2, g14894.t1, g8302.t1		XP_055328640.1, XP_055341721.1, XP_055342598.1, XP_055350298.1, XP_055350299.1, XP_055352374.1, XP_055353805.1, XP_055354502.1, XP_055357019.1, XP_055357021.1, XP_055357022.1	GAU90800.1, GAU90801.1, GAU91126.1, GAU91127.1, GAV08982.1
OG0000327	g12998.t1, g13698.t1, g15089.t1, g15157.t1, g15516.t1		XP_055329844.1, XP_055329985.1, XP_055329987.1, XP_055336953.1, XP_055344847.1, XP_055345297.1, XP_055347293.1, XP_055347328.1, XP_055349666.1, XP_055350074.1, XP_055352764.1, XP_055356504.1, XP_055357117.1	GAV09139.1, GAV09995.1
OG0000328	g10117.t1, g11100.t1, g11264.t1, g11592.t1, g11597.t1, g11600.t1, g11603.t1, g11607.t1, g1277.t1, g1278.t1, g1295.t1, g14475.t1, g15224.t1, g2016.t1, g2826.t1, g2838.t1, g3130.t1, g4736.t1, g6695.t1	OQV25384.1
OG0000329	g1067.t1, g11073.t1, g11297.t1, g11506.t1, g11549.t1, g11686.t1, g11991.t1, g11997.t1, g1285.t1, g1289.t1, g13040.t1, g2979.t1, g548.t1, g6.t1, g6172.t1, g7454.t1		XP_055337908.1, XP_055340857.1, XP_055352605.1, XP_055352606.1
OG0000330	g13295.t1, g5514.t1, g7626.t1, g986.t1, g9954.t1	OQV13305.1, OQV13306.1, OQV19138.1, OQV19139.1, OWA51236.1, OWA51237.1, OWA51239.1, OWA51658.1, OWA52877.1, OWA53889.1, OWA55143.1, OWA55145.1, OWA55619.1, OWA55693.1	XP_055345905.1
OG0000331	g10424.t1, g11953.t1, g8661.t1, g9257.t1	OQV17568.1, OQV20925.1, OQV24555.1, OQV24607.1, OQV24684.1, OQV24695.1, OWA54130.1	XP_055330047.1, XP_055330048.1, XP_055331977.1, XP_055336714.1, XP_055337281.1, XP_055337282.1	GAU94130.1, GAU94245.1, GAV05296.1
OG0000332	g13149.t1, g8206.t1	OQV14977.1, OQV18923.1	XP_055328161.1, XP_055330359.1, XP_055330384.1, XP_055330418.1	GAU91518.1, GAU94031.1, GAU94032.1, GAU94033.1, GAU94034.1, GAV06577.1, GAV06579.1, GAV06748.1, GAV06763.1, GAV06764.1, GAV07199.1, GAV07215.1
OG0000333	g12831.t1, g6998.t1	OQV26036.1	XP_055341222.1, XP_055341223.1, XP_055341224.1, XP_055341225.1, XP_055341227.1, XP_055341228.1, XP_055341229.1	GAV05546.1, GAV05547.1, GAV05548.1, GAV05549.1, GAV05550.1, GAV05551.1, GAV05552.1, GAV05553.1, GAV05554.1, GAV05555.1
OG0000334	g14488.t1, g3994.t1, g8364.t1, g9628.t1	OQV18775.1	XP_055329618.1, XP_055329893.1, XP_055330034.1, XP_055330035.1, XP_055330036.1, XP_055343168.1, XP_055347754.1, XP_055347755.1, XP_055347756.1, XP_055347758.1, XP_055347759.1, XP_055357119.1	GAV00543.1, GAV00544.1, GAV00547.1
OG0000335	g15778.t1, g6988.t1		XP_055327912.1, XP_055333016.1, XP_055333017.1, XP_055333519.1, XP_055341030.1, XP_055354291.1, XP_055354292.1, XP_055357567.1	GAU89288.1, GAU89289.1, GAU89944.1, GAU89945.1, GAU95157.1, GAU97618.1, GAU99020.1, GAV08113.1, GAV08114.1, GAV08115.1
OG0000336		OQV13524.1, OQV13525.1, OQV24628.1, OWA49976.1, OWA49977.1, OWA49978.1, OWA49979.1, OWA49980.1, OWA49981.1, OWA49982.1, OWA49984.1, OWA50938.1, OWA54185.1	XP_055346936.1, XP_055346937.1, XP_055349090.1, XP_055349091.1, XP_055357540.1	GAV01159.1, GAV06097.1
OG0000337		OQV20000.1, OQV20792.1, OWA51411.1, OWA54365.1	XP_055339009.1, XP_055341036.1	GAU92041.1, GAU94454.1, GAU95084.1, GAU97129.1, GAV00937.1, GAV04937.1, GAV06246.1, GAV06501.1, GAV08488.1, GAV09935.1, GAV09966.1, GAV09982.1, GAV10006.1, GAV10063.1
OG0000338		OQV20406.1, OQV20408.1, OQV20414.1, OQV20415.1, OQV20418.1, OQV20420.1, OQV20421.1, OQV20422.1, OQV20423.1, OQV20426.1, OQV20427.1, OQV23107.1, OQV23108.1, OQV23109.1, OQV23111.1, OWA50104.1, OWA51568.1, OWA51569.1, OWA55148.1, OWA55150.1
OG0000339			XP_055327525.1, XP_055327565.1, XP_055327601.1, XP_055330404.1, XP_055330425.1, XP_055336556.1, XP_055336873.1, XP_055344368.1, XP_055346492.1, XP_055346760.1, XP_055347142.1, XP_055349358.1, XP_055351875.1, XP_055352771.1, XP_055355804.1, XP_055355956.1, XP_055356731.1, XP_055356732.1, XP_055357243.1, XP_055357381.1
OG0000340			XP_055328242.1, XP_055332841.1, XP_055332842.1, XP_055333089.1, XP_055333090.1, XP_055333091.1, XP_055333092.1, XP_055333098.1, XP_055350390.1, XP_055350391.1, XP_055350392.1, XP_055350397.1, XP_055350398.1, XP_055350399.1, XP_055350401.1, XP_055350404.1, XP_055353151.1, XP_055354137.1, XP_055356307.1, XP_055356309.1
OG0000341			XP_055329420.1, XP_055331255.1, XP_055332287.1, XP_055332595.1, XP_055332601.1, XP_055340465.1, XP_055340472.1, XP_055341007.1, XP_055347117.1, XP_055347375.1, XP_055347460.1, XP_055347479.1, XP_055347480.1, XP_055348595.1, XP_055348965.1, XP_055352045.1, XP_055353238.1, XP_055353995.1, XP_055354317.1, XP_055356641.1
OG0000342			XP_055343816.1, XP_055343817.1, XP_055343819.1, XP_055343820.1, XP_055343821.1, XP_055343822.1, XP_055343948.1, XP_055343954.1, XP_055343955.1, XP_055343958.1, XP_055343959.1, XP_055343970.1, XP_055352244.1, XP_055352246.1, XP_055352247.1, XP_055352248.1, XP_055352249.1, XP_055352250.1, XP_055352251.1, XP_055352252.1
OG0000343	g8115.t1		XP_055329843.1, XP_055329984.1, XP_055332161.1, XP_055349667.1, XP_055352769.1, XP_055356501.1, XP_055356747.1, XP_055356750.1, XP_055356751.1, XP_055356752.1, XP_055356753.1, XP_055356754.1, XP_055356755.1, XP_055356756.1, XP_055356974.1, XP_055356975.1, XP_055356976.1, XP_055357116.1
OG0000344	g1228.t1, g1228.t2, g1291.t1, g6559.t1, g6559.t2	OQV13671.1, OQV13746.1, OQV15339.1, OQV19488.1, OWA52405.1, OWA52734.1, OWA52735.1, OWA53554.1, OWA53639.1, OWA53640.1, OWA55409.1, OWA55469.1	XP_055342530.1	GAU96994.1
OG0000345	g498.t1		XP_055327382.1, XP_055329469.1, XP_055329478.1, XP_055337438.1, XP_055337794.1, XP_055338289.1, XP_055338290.1, XP_055338291.1, XP_055339717.1, XP_055340185.1, XP_055346293.1, XP_055346294.1, XP_055349161.1, XP_055351660.1, XP_055352274.1, XP_055352276.1, XP_055352277.1, XP_055357922.1
OG0000346	g13513.t1, g942.t1	OQV12208.1, OQV17236.1, OWA54462.1	XP_055338261.1, XP_055340678.1	GAU87239.1, GAU93234.1, GAU99067.1, GAU99068.1, GAU99391.1, GAU99392.1, GAV04218.1, GAV04219.1, GAV08908.1, GAV08909.1, GAV08910.1, GAV08911.1
OG0000347	g5505.t1, g6714.t1	OQV20212.1, OQV20213.1, OQV20921.1	XP_055329536.1, XP_055329537.1, XP_055329538.1, XP_055332780.1, XP_055332858.1, XP_055332859.1, XP_055332882.1, XP_055332883.1, XP_055348548.1, XP_055354458.1, XP_055354459.1	GAU89892.1, GAU89893.1, GAU89894.1
OG0000348	g13316.t1, g13317.t1, g13317.t2	OQV18798.1, OQV18799.1, OQV18800.1, OQV18801.1, OQV18802.1, OQV18803.1, OQV18804.1, OWA49865.1, OWA49866.1, OWA49867.1, OWA49868.1, OWA49869.1, OWA49870.1, OWA52225.1, OWA55570.1		GAV06703.1
OG0000349	g12214.t1, g13954.t1, g1835.t1, g2033.t1, g3857.t1, g7591.t1			GAU89447.1, GAU89448.1, GAU90026.1, GAU90027.1, GAU97125.1, GAU97126.1, GAV00324.1, GAV00325.1, GAV01115.1, GAV01123.1, GAV04461.1, GAV05091.1, GAV09643.1
OG0000350	g13294.t1, g1820.t1, g4136.t1	OQV16863.1, OQV16939.1, OQV17219.1, OQV22854.1, OQV23370.1, OQV26140.1, OWA55104.1	XP_055338427.1, XP_055338628.1, XP_055338629.1, XP_055351377.1, XP_055357706.1	GAU87282.1, GAU87283.1, GAU91870.1, GAV06751.1
OG0000351	g1012.t1, g10784.t1, g12870.t1, g13388.t1, g13427.t1, g15738.t1, g2101.t1, g3450.t1, g4716.t1, g6017.t1, g7618.t1	OQV12408.1, OQV16754.1	XP_055344053.1, XP_055344054.1, XP_055344073.1	GAV02533.1, GAV02534.1, GAV08191.1
OG0000352	g1856.t1, g196.t1, g199.t1, g210.t1, g212.t1, g213.t1, g214.t1, g4871.t1, g5643.t1, g7905.t1, g7941.t1		XP_055330708.1	GAU92194.1, GAU92238.1, GAU92239.1, GAU92240.1, GAU92241.1, GAV07468.1, GAV07469.1
OG0000353	g11364.t1, g11512.t1, g12223.t1, g1247.t1, g1248.t1, g13767.t1, g14991.t1, g1839.t1, g2528.t1, g2678.t1, g4126.t1, g4128.t1, g4132.t1, g4133.t1, g4134.t1, g4135.t1, g4552.t1, g6719.t1, g799.t1
OG0000354	g1072.t1, g12314.t1, g12568.t1, g13689.t1, g14332.t1, g2074.t1, g5639.t1, g8408.t1, g9273.t1		XP_055334220.1, XP_055345560.1, XP_055349497.1, XP_055351573.1, XP_055353806.1, XP_055355916.1, XP_055355930.1, XP_055356594.1	GAV09142.1, GAV09638.1
OG0000355	g10679.t1, g14549.t1, g14553.t1, g15652.t1, g2805.t1, g301.t1, g3938.t1, g4692.t1, g4852.t1, g4883.t1, g5150.t1, g5558.t1, g5742.t1, g5742.t2, g6586.t1, g8557.t1, g9601.t1	OQV18670.1	XP_055352652.1
OG0000356	g1961.t1, g1963.t1	OQV18877.1, OWA51792.1, OWA51793.1, OWA51794.1, OWA51795.1, OWA51796.1, OWA51797.1, OWA51798.1, OWA54916.1, OWA54918.1	XP_055343875.1, XP_055344072.1, XP_055347786.1, XP_055348487.1, XP_055349426.1	GAU88955.1, GAU89931.1
OG0000357	g10918.t1, g12379.t1, g1400.t1, g2525.t1, g2793.t1, g2878.t1, g2879.t1, g2880.t1, g2881.t1, g5159.t1, g5160.t1, g5160.t2, g5161.t1, g5162.t1, g5163.t1, g5164.t1, g5165.t1, g8601.t1, g9520.t1
OG0000358	g10673.t1, g10677.t1, g11184.t1, g11185.t1, g15386.t1, g2265.t1, g34.t1, g730.t1, g9378.t1, g9963.t1	OQV12035.1, OQV12036.1, OQV12037.1, OQV12038.1, OQV14324.1, OWA54748.1	XP_055353872.1, XP_055353890.1	GAV01288.1
OG0000359	g13380.t1, g5020.t1, g5383.t1	OQV16232.1, OQV16233.1, OQV25431.1, OQV25432.1, OQV25433.1, OQV25435.1, OQV25436.1, OQV25437.1, OQV25438.1, OQV25439.1, OQV25442.1, OWA55698.1, OWA55716.1	XP_055355643.1, XP_055355657.1	GAU95024.1
OG0000360	g8725.t1	OQV21189.1	XP_055339060.1, XP_055339061.1, XP_055339062.1, XP_055339063.1, XP_055339064.1, XP_055339065.1, XP_055339066.1, XP_055339067.1, XP_055339784.1, XP_055339785.1, XP_055339786.1, XP_055339788.1, XP_055339789.1, XP_055339790.1, XP_055356395.1, XP_055356407.1	GAV05830.1
OG0000361	g15119.t1, g15120.t1, g15120.t2, g15121.t1	OQV15176.1, OQV19037.1, OQV22723.1, OWA50937.1, OWA51968.1, OWA52203.1, OWA52204.1, OWA52205.1, OWA52206.1	XP_055330788.1, XP_055349462.1, XP_055349464.1, XP_055353763.1	GAU88730.1, GAV00060.1
OG0000362	g11436.t1, g5365.t1, g5365.t2	OQV16190.1, OQV16191.1, OQV19530.1, OQV19531.1, OQV19532.1, OWA55663.1	XP_055332276.1, XP_055332500.1, XP_055332501.1, XP_055332572.1, XP_055332594.1, XP_055344675.1, XP_055344781.1, XP_055344786.1, XP_055352774.1	GAU92251.1
OG0000363	g8213.t1	OQV11842.1, OQV11843.1, OQV11958.1, OQV13550.1, OQV14282.1, OQV14685.1, OQV16099.1, OQV16911.1, OQV21914.1, OQV22883.1, OQV22884.1, OQV23317.1, OQV24005.1, OQV25050.1, OWA52939.1		GAU87286.1, GAU87287.1, GAV08181.1
OG0000364	g9632.t1	OQV14932.1, OWA51638.1	XP_055330626.1, XP_055330627.1, XP_055330628.1, XP_055330629.1, XP_055332873.1, XP_055333009.1, XP_055333011.1, XP_055333012.1	GAU92072.1, GAU92096.1, GAU92097.1, GAU93940.1, GAV01149.1, GAV01150.1, GAV01151.1, GAV01152.1
OG0000365	g10680.t1	OQV17040.1, OQV18669.1	XP_055330353.1, XP_055330462.1, XP_055330463.1, XP_055336743.1, XP_055356159.1, XP_055356160.1, XP_055356161.1, XP_055356164.1, XP_055357204.1, XP_055357205.1, XP_055357206.1, XP_055357522.1, XP_055357523.1, XP_055357524.1, XP_055357525.1, XP_055357526.1
OG0000366		OQV11782.1, OQV11783.1, OQV11792.1, OQV13729.1, OQV13730.1, OQV13738.1, OQV13739.1, OQV13740.1, OQV13741.1, OQV23528.1, OQV24920.1, OQV24921.1, OQV24922.1, OQV24923.1, OQV24924.1, OQV24925.1, OQV24926.1, OQV24927.1, OWA51324.1
OG0000367		OQV12438.1, OQV12444.1, OQV12445.1, OQV14918.1, OQV19512.1, OQV20016.1, OQV24191.1, OWA50511.1, OWA50864.1, OWA51400.1, OWA52771.1, OWA52772.1, OWA53495.1, OWA53655.1, OWA53844.1, OWA54445.1, OWA54446.1, OWA55645.1	XP_055345192.1
OG0000368		OQV18658.1, OQV26243.1	XP_055327813.1, XP_055327815.1, XP_055333843.1, XP_055333851.1, XP_055333858.1, XP_055344226.1	GAU87360.1, GAU89208.1, GAU89209.1, GAU90903.1, GAU99241.1, GAU99690.1, GAV02369.1, GAV03281.1, GAV06224.1, GAV09486.1, GAV09487.1
OG0000369			XP_055328164.1, XP_055328247.1, XP_055328248.1, XP_055342119.1, XP_055342207.1, XP_055342215.1, XP_055342232.1, XP_055342251.1, XP_055342255.1, XP_055354144.1, XP_055354145.1, XP_055354146.1, XP_055354165.1, XP_055354169.1, XP_055354170.1, XP_055354172.1, XP_055354173.1, XP_055354178.1, XP_055357132.1
OG0000370			XP_055333424.1, XP_055333425.1, XP_055337852.1, XP_055337853.1, XP_055337854.1, XP_055337855.1, XP_055337856.1, XP_055337857.1, XP_055337858.1, XP_055337860.1, XP_055337861.1, XP_055337862.1, XP_055337863.1, XP_055337864.1, XP_055337865.1, XP_055337879.1, XP_055337880.1, XP_055337942.1, XP_055348354.1
OG0000371			XP_055333447.1, XP_055342031.1, XP_055345288.1, XP_055345289.1, XP_055345290.1, XP_055345291.1, XP_055345292.1, XP_055356295.1, XP_055356296.1, XP_055356297.1, XP_055356298.1, XP_055356299.1, XP_055356300.1, XP_055356982.1, XP_055356983.1, XP_055356984.1, XP_055356985.1, XP_055356986.1, XP_055357005.1
OG0000372			XP_055335730.1, XP_055335731.1, XP_055335762.1, XP_055335763.1, XP_055335764.1, XP_055335765.1, XP_055335766.1, XP_055339200.1, XP_055339201.1, XP_055339202.1, XP_055339203.1, XP_055352978.1, XP_055352979.1, XP_055357177.1, XP_055357178.1, XP_055357179.1, XP_055357180.1, XP_055357188.1	GAV04071.1
OG0000373			XP_055336037.1, XP_055336038.1, XP_055336039.1, XP_055336040.1, XP_055336475.1, XP_055336476.1, XP_055336477.1, XP_055336478.1, XP_055336479.1, XP_055337887.1, XP_055337888.1, XP_055350895.1, XP_055356763.1, XP_055356764.1, XP_055356765.1, XP_055356766.1, XP_055356767.1, XP_055356768.1	GAU89971.1
OG0000374			XP_055343067.1, XP_055343068.1, XP_055343069.1, XP_055350757.1, XP_055350758.1, XP_055350759.1, XP_055350982.1, XP_055350983.1, XP_055350984.1, XP_055350985.1, XP_055350986.1, XP_055350987.1, XP_055350990.1, XP_055350991.1, XP_055350992.1, XP_055350993.1, XP_055356716.1, XP_055356805.1, XP_055356806.1
OG0000375			XP_055356897.1	GAU92793.1, GAU92794.1, GAU92795.1, GAU93532.1, GAU93534.1, GAU95170.1, GAU96107.1, GAU96108.1, GAV02861.1, GAV04237.1, GAV05120.1, GAV05125.1, GAV08508.1, GAV08509.1, GAV08796.1, GAV08830.1, GAV08831.1, GAV09718.1
OG0000376				GAU87345.1, GAU87348.1, GAU89086.1, GAU89088.1, GAU89483.1, GAU89860.1, GAU89861.1, GAU91491.1, GAU95612.1, GAU96466.1, GAU99937.1, GAV00736.1, GAV01471.1, GAV01849.1, GAV03706.1, GAV03728.1, GAV04469.1, GAV08458.1
OG0000377				GAU91892.1, GAU91893.1, GAU91894.1, GAU93301.1, GAU94176.1, GAU94177.1, GAU94710.1, GAU95522.1, GAU95523.1, GAU95533.1, GAU95534.1, GAU99371.1, GAU99962.1, GAV03055.1, GAV04010.1, GAV06420.1, GAV06958.1, GAV07126.1
OG0000378	g10516.t1, g11892.t1, g15448.t1, g3944.t1, g4915.t1, g735.t1	OWA52733.1, OWA55410.1	XP_055331142.1, XP_055331258.1, XP_055349439.1	GAU87512.1, GAU87593.1, GAU87598.1, GAU87662.1, GAU89592.1, GAU99797.1, GAV00785.1
OG0000379		OQV14870.1, OQV14876.1, OQV14881.1, OQV14882.1, OQV15817.1, OQV17286.1, OQV17945.1, OQV24102.1, OWA50348.1, OWA50754.1, OWA50756.1, OWA51041.1, OWA51046.1, OWA51047.1, OWA51049.1, OWA51050.1, OWA52723.1, OWA55601.1
OG0000380	g11625.t1, g13875.t1, g14040.t1, g14774.t1, g3213.t1, g5434.t1, g7209.t1, g8097.t1, g9350.t1, g9871.t1	OQV11949.1, OQV24641.1, OWA52025.1, OWA52036.1, OWA53777.1, OWA53778.1	XP_055357879.1	GAU95380.1
OG0000381	g1597.t1, g2068.t1, g2727.t1, g2982.t1, g3020.t1, g3093.t1, g3784.t1, g4926.t1, g4979.t1, g5218.t1, g7279.t1, g7456.t1, g7508.t1, g8185.t1, g9494.t1		XP_055342016.1, XP_055342017.1	GAU89457.1
OG0000382	g13083.t1, g14583.t1, g15305.t1, g15647.t1, g2780.t1, g3782.t1, g4651.t1, g6711.t1, g7936.t1, g9382.t1	OQV12253.1, OQV12254.1, OQV12255.1	XP_055344411.1, XP_055349485.1, XP_055353590.1	GAU95872.1, GAU95873.1
OG0000383	g10533.t1, g11179.t1, g14057.t1, g3609.t1, g3610.t1, g4330.t1, g779.t1	OQV17658.1, OQV20038.1, OQV20039.1, OQV20798.1, OQV20864.1, OQV20865.1, OQV22213.1	XP_055328331.1, XP_055328568.1, XP_055330808.1, XP_055339100.1
OG0000384	g11543.t1, g1333.t1, g15382.t1, g3991.t1, g4259.t1, g5457.t1, g5460.t1, g5487.t1, g6435.t1, g6705.t1, g6815.t1, g6980.t1, g7193.t1, g7887.t1	OWA53422.1, OWA54512.1	XP_055342039.1, XP_055347989.1
OG0000385	g3087.t1	OQV14009.1, OWA51037.1, OWA51038.1	XP_055336134.1, XP_055336283.1, XP_055337051.1, XP_055337052.1, XP_055337362.1, XP_055337363.1, XP_055339213.1, XP_055352742.1, XP_055352743.1, XP_055352744.1, XP_055352745.1, XP_055352766.1, XP_055355406.1	GAU90461.1
OG0000386	g14432.t1, g14434.t1, g6976.t1, g830.t1		XP_055342672.1, XP_055342673.1, XP_055342674.1, XP_055343037.1, XP_055343038.1, XP_055343039.1, XP_055343040.1, XP_055343041.1, XP_055343111.1, XP_055343112.1, XP_055350859.1, XP_055350860.1, XP_055350861.1, XP_055350862.1
OG0000387	g11286.t1, g11286.t2, g11893.t1, g1230.t1, g12601.t1, g12901.t1, g14641.t1, g14926.t1, g3160.t1, g3943.t1, g4303.t1, g5304.t1, g7814.t1, g7814.t2, g9383.t1, g9383.t2	OQV11794.1	XP_055353593.1
OG0000388	g10988.t1	OQV15017.1, OQV15018.1, OQV20571.1, OQV20572.1, OQV20574.1, OQV20588.1, OQV20589.1, OQV20590.1, OWA51249.1, OWA51250.1, OWA51251.1, OWA51252.1	XP_055327424.1, XP_055337790.1, XP_055337896.1, XP_055337929.1	GAV01532.1
OG0000389	g10292.t1, g12421.t1, g4868.t1, g7817.t1, g7818.t1, g7819.t1, g9447.t1	OQV21954.1, OQV21955.1, OQV21956.1, OQV21957.1	XP_055353213.1, XP_055353214.1	GAU88828.1, GAU88829.1, GAU88830.1, GAU88839.1, GAU89428.1
OG0000390	g4774.t1	OQV17885.1, OQV19307.1, OQV19308.1, OQV25532.1, OWA53040.1, OWA53041.1	XP_055340863.1, XP_055340864.1, XP_055348970.1, XP_055352555.1, XP_055353235.1, XP_055357789.1, XP_055357791.1, XP_055357792.1, XP_055357793.1	GAV01113.1, GAV01114.1
OG0000391	g14044.t1, g4538.t1	OQV17276.1, OQV17743.1, OQV17744.1, OQV17745.1, OQV17747.1, OQV17769.1, OQV23355.1, OQV24802.1, OWA51503.1	XP_055343537.1, XP_055357697.1, XP_055357698.1, XP_055357699.1, XP_055357700.1	GAU95529.1, GAV08725.1
OG0000392	g10514.t1, g11352.t1, g11505.t1, g11899.t1, g13472.t1, g13950.t1, g14382.t1, g15271.t1, g2421.t1, g4145.t1, g4350.t1, g4636.t1, g4942.t1, g5707.t1, g7280.t1, g7674.t1, g8189.t1, g8448.t1
OG0000393	g12217.t1, g12218.t1, g13858.t1, g13859.t1, g2252.t1, g3441.t1, g9952.t1	OQV13353.1, OQV14234.1, OQV14236.1, OQV14239.1, OWA53039.1	XP_055346071.1, XP_055356800.1, XP_055356808.1, XP_055356814.1	GAU88542.1, GAU90071.1
OG0000394	g6140.t1	OQV11441.1, OQV12548.1, OQV16497.1, OQV17321.1, OQV21349.1, OQV24930.1, OQV24931.1, OWA51120.1, OWA51121.1, OWA51123.1, OWA51127.1, OWA51325.1, OWA52917.1, OWA53136.1, OWA53185.1, OWA53193.1, OWA54180.1
OG0000395	g13972.t1, g758.t1	OQV13212.1, OQV19436.1, OWA52427.1, OWA52428.1, OWA54007.1, OWA55048.1	XP_055334313.1, XP_055339070.1, XP_055349820.1, XP_055351571.1, XP_055355908.1, XP_055355927.1, XP_055356597.1, XP_055357115.1	GAV04589.1, GAV06102.1
OG0000396	g1384.t1, g7815.t1, g7816.t1, g801.t1, g803.t1	OQV17220.1	XP_055349727.1, XP_055349728.1, XP_055349729.1, XP_055349730.1, XP_055349731.1, XP_055349733.1, XP_055349734.1, XP_055349735.1, XP_055349736.1, XP_055349737.1, XP_055349774.1	GAU96579.1
OG0000397	g4519.t1, g4519.t2	OQV15594.1, OQV22561.1	XP_055352473.1, XP_055352475.1	GAU95843.1, GAU95900.1, GAV04701.1, GAV04702.1, GAV04703.1, GAV04704.1, GAV04705.1, GAV04706.1, GAV04707.1, GAV04708.1, GAV04709.1, GAV04710.1
OG0000398	g6888.t1	OQV18928.1	XP_055342068.1, XP_055342069.1, XP_055342070.1, XP_055342071.1, XP_055342073.1, XP_055342074.1, XP_055342075.1, XP_055342076.1, XP_055342077.1, XP_055342078.1, XP_055342079.1, XP_055342080.1, XP_055342081.1, XP_055342082.1	GAU93776.1, GAU93777.1
OG0000399	g7558.t1	OQV15752.1, OQV15753.1, OQV17648.1, OQV19223.1, OQV19224.1, OQV19226.1, OQV19227.1, OQV22984.1, OWA50089.1, OWA50091.1, OWA51279.1, OWA51971.1, OWA54657.1, OWA54910.1	XP_055338576.1, XP_055338583.1	GAV05506.1
OG0000400	g15144.t1, g15144.t2	OQV16878.1, OQV21772.1, OQV21773.1	XP_055328442.1, XP_055328443.1, XP_055328444.1, XP_055328445.1, XP_055328446.1, XP_055328447.1, XP_055328448.1, XP_055341198.1	GAU89806.1, GAU89807.1, GAU89808.1, GAV03625.1, GAV03626.1
OG0000401		OQV11454.1, OQV18675.1, OWA51004.1	XP_055333773.1, XP_055345643.1, XP_055348459.1, XP_055349651.1, XP_055350254.1, XP_055350263.1, XP_055350268.1, XP_055350269.1, XP_055350275.1, XP_055350276.1, XP_055350277.1, XP_055350281.1, XP_055350282.1, XP_055350348.1, XP_055351480.1
OG0000402		OQV12135.1, OQV12930.1, OQV12931.1, OQV12933.1, OWA53148.1, OWA53149.1, OWA53150.1, OWA53151.1, OWA53152.1, OWA53153.1, OWA53154.1, OWA53156.1, OWA53157.1	XP_055347344.1, XP_055347365.1, XP_055347394.1, XP_055347478.1, XP_055347481.1
OG0000403		OQV21973.1, OQV21975.1, OQV21976.1, OWA53038.1	XP_055344649.1, XP_055344735.1, XP_055346545.1, XP_055346575.1, XP_055347847.1, XP_055349448.1, XP_055349987.1, XP_055350328.1, XP_055350523.1, XP_055350694.1, XP_055351337.1, XP_055351346.1, XP_055351355.1, XP_055351363.1
OG0000404			XP_055327471.1, XP_055327472.1, XP_055329024.1, XP_055329033.1, XP_055334337.1, XP_055335437.1, XP_055335512.1, XP_055338612.1, XP_055339707.1, XP_055342245.1, XP_055349635.1, XP_055349636.1, XP_055349637.1, XP_055349638.1, XP_055349639.1, XP_055350371.1, XP_055354100.1, XP_055357214.1
OG0000405			XP_055327590.1, XP_055327591.1, XP_055327592.1, XP_055327593.1, XP_055327594.1, XP_055327595.1, XP_055327596.1, XP_055327597.1, XP_055327598.1, XP_055327599.1, XP_055327600.1, XP_055327603.1, XP_055327604.1, XP_055327605.1, XP_055327606.1, XP_055328334.1, XP_055328335.1, XP_055338448.1
OG0000406			XP_055327769.1, XP_055328111.1, XP_055328112.1, XP_055330705.1, XP_055330738.1, XP_055330768.1, XP_055330770.1, XP_055344447.1, XP_055344448.1, XP_055344462.1, XP_055344463.1, XP_055344493.1, XP_055344499.1, XP_055352368.1, XP_055352369.1, XP_055352936.1, XP_055355769.1, XP_055355770.1
OG0000407			XP_055331877.1, XP_055331878.1, XP_055331879.1, XP_055331880.1, XP_055331881.1, XP_055331882.1, XP_055331907.1, XP_055331908.1, XP_055331909.1, XP_055331910.1, XP_055331911.1, XP_055331912.1, XP_055331917.1, XP_055332065.1, XP_055332223.1, XP_055338615.1, XP_055347703.1, XP_055353475.1
OG0000408			XP_055335078.1, XP_055335083.1, XP_055335084.1, XP_055335090.1, XP_055335091.1, XP_055335875.1, XP_055335876.1, XP_055350307.1, XP_055352348.1, XP_055352349.1, XP_055352378.1, XP_055352380.1, XP_055352381.1, XP_055352383.1, XP_055352384.1, XP_055353154.1, XP_055353300.1, XP_055357057.1
OG0000409			XP_055335705.1, XP_055335870.1, XP_055335871.1, XP_055335906.1, XP_055335907.1, XP_055335908.1, XP_055335912.1, XP_055335913.1, XP_055335914.1, XP_055335915.1, XP_055335945.1, XP_055350830.1, XP_055350831.1, XP_055350832.1, XP_055354990.1, XP_055354991.1, XP_055354992.1, XP_055354993.1
OG0000410			XP_055339154.1, XP_055339155.1, XP_055341663.1, XP_055341745.1, XP_055341826.1, XP_055341907.1, XP_055341983.1, XP_055342057.1, XP_055342130.1, XP_055346507.1, XP_055346508.1, XP_055346509.1, XP_055346510.1, XP_055346511.1, XP_055346512.1, XP_055346513.1, XP_055353131.1, XP_055353132.1
OG0000411			XP_055344484.1, XP_055347991.1, XP_055348026.1, XP_055348031.1, XP_055348235.1, XP_055349961.1, XP_055351427.1, XP_055351428.1, XP_055351433.1, XP_055351455.1, XP_055352565.1, XP_055353028.1, XP_055353046.1, XP_055353047.1, XP_055354674.1, XP_055355495.1, XP_055357246.1, XP_055357414.1
OG0000412	g15226.t1, g3589.t1	OQV15024.1, OQV16098.1, OQV16739.1, OQV16740.1, OQV16741.1, OQV16742.1, OQV20037.1, OQV24203.1, OWA50382.1, OWA51560.1, OWA53093.1, OWA54805.1, OWA55598.1, OWA55616.1		GAV01890.1
OG0000413	g1629.t1	OQV17600.1, OQV17601.1, OQV25993.1, OQV26208.1, OWA51299.1, OWA51335.1, OWA51337.1, OWA51338.1, OWA51340.1, OWA51341.1, OWA51342.1, OWA51347.1, OWA53132.1, OWA53695.1, OWA54678.1, OWA54963.1
OG0000414	g12822.t1	OQV11554.1, OQV13248.1, OQV14061.1, OQV16823.1, OQV20893.1, OWA50835.1, OWA53065.1, OWA53413.1, OWA53747.1, OWA54627.1, OWA54630.1, OWA55428.1		GAU92392.1, GAU92510.1, GAV01238.1, GAV06532.1
OG0000415	g10506.t1, g11482.t1, g12275.t1, g12369.t1, g14873.t1, g14954.t1, g14955.t1, g15297.t1, g2978.t1, g3148.t1, g4006.t1, g4323.t1, g7947.t1, g9908.t1	OQV20696.1, OWA50631.1, OWA51238.1
OG0000416	g10544.t1, g10545.t1, g12284.t1, g12285.t1, g13459.t1, g14860.t1, g2663.t1, g8223.t1, g9043.t1, g9044.t1, g9696.t1	OQV11798.1	XP_055328913.1, XP_055328914.1, XP_055335079.1, XP_055347947.1, XP_055349264.1
OG0000417	g12043.t1, g14485.t1, g5810.t1, g6376.t1	OQV25429.1	XP_055338527.1, XP_055338528.1, XP_055338529.1, XP_055342303.1, XP_055342304.1, XP_055342305.1, XP_055351651.1, XP_055351652.1, XP_055351653.1, XP_055351654.1, XP_055351655.1	GAV06594.1
OG0000418	g3019.t1	OQV13565.1, OQV17972.1, OWA53989.1, OWA53994.1, OWA54970.1	XP_055332808.1, XP_055332809.1, XP_055335953.1, XP_055335955.1, XP_055335956.1, XP_055335957.1, XP_055335958.1, XP_055335959.1, XP_055335961.1, XP_055346696.1, XP_055351896.1
OG0000419	g8207.t1	OQV17336.1, OQV17337.1, OQV24806.1, OQV24807.1	XP_055329037.1, XP_055329735.1, XP_055332126.1, XP_055332262.1, XP_055332271.1, XP_055333734.1, XP_055333735.1, XP_055333812.1, XP_055344877.1, XP_055345335.1, XP_055353482.1, XP_055355177.1
OG0000420	g10510.t1, g11237.t1, g1220.t1, g1222.t1, g13561.t1, g15395.t1, g4856.t1, g6038.t1, g6243.t1, g6694.t1, g724.t1, g8395.t1, g9033.t1, g9034.t1		XP_055352041.1	GAU88657.1, GAV09380.1
OG0000421	g8823.t1, g9493.t1			GAU87426.1, GAU90474.1, GAU92680.1, GAU94224.1, GAU94840.1, GAU94841.1, GAU95004.1, GAU95005.1, GAU97073.1, GAU97075.1, GAU97076.1, GAU97871.1, GAV03757.1, GAV08383.1, GAV08476.1
OG0000422	g10125.t1, g10125.t2, g11363.t1, g11365.t1, g11641.t1, g12042.t1, g12042.t2, g1720.t1, g1838.t1, g3413.t1, g3662.t1, g4121.t1, g5675.t1, g5686.t1, g5686.t2, g8962.t1, g8963.t1
OG0000423	g11035.t1, g11862.t1, g220.t1, g5697.t1, g753.t1, g8597.t1	OWA54018.1, OWA54019.1, OWA54020.1, OWA54869.1, OWA54870.1, OWA55382.1	XP_055353540.1, XP_055353565.1, XP_055353566.1	GAU95924.1, GAU95925.1
OG0000424	g14279.t1, g14983.t1, g1920.t1, g2520.t1, g9392.t1	OQV18410.1, OQV20953.1	XP_055351215.1	GAU91188.1, GAU91189.1, GAU91190.1, GAU91191.1, GAV06476.1, GAV06477.1, GAV06478.1, GAV06479.1, GAV06480.1
OG0000425	g15106.t1, g15248.t1, g6682.t1	OQV13558.1, OQV17772.1, OQV24120.1, OWA50641.1, OWA50839.1, OWA51307.1, OWA51308.1, OWA51309.1, OWA51311.1, OWA51313.1, OWA51314.1, OWA51315.1, OWA52408.1, OWA54482.1
OG0000426	g1656.t1	OQV24686.1, OQV25677.1, OQV25678.1	XP_055332916.1, XP_055332917.1, XP_055332918.1, XP_055332919.1, XP_055332920.1, XP_055332921.1, XP_055332922.1, XP_055332923.1	GAV09947.1, GAV09976.1, GAV09977.1, GAV10049.1, GAV10054.1
OG0000427	g1697.t1	OQV18986.1	XP_055333182.1, XP_055333183.1, XP_055333184.1, XP_055333185.1, XP_055333187.1, XP_055333188.1, XP_055333189.1, XP_055333190.1, XP_055333191.1, XP_055333192.1, XP_055333193.1, XP_055333194.1, XP_055333195.1, XP_055333198.1	GAV00818.1
OG0000428	g12968.t1	OQV25154.1, OQV25155.1, OQV25156.1, OQV25158.1, OQV25159.1, OQV25235.1	XP_055327779.1, XP_055328560.1, XP_055342929.1, XP_055342930.1, XP_055342931.1, XP_055353696.1, XP_055354287.1, XP_055354304.1	GAV04217.1, GAV04221.1
OG0000429	g11575.t1, g15278.t1, g15278.t2, g2682.t1, g6171.t1	OQV21653.1, OWA52161.1, OWA52166.1, OWA52167.1, OWA52168.1, OWA52169.1, OWA52174.1	XP_055337112.1, XP_055338943.1	GAU88349.1, GAU88350.1, GAV08402.1
OG0000430	g2090.t1, g5311.t1, g564.t1, g755.t1, g9341.t1, g9341.t2	OQV14010.1	XP_055357660.1	GAU91792.1, GAU95217.1, GAU95218.1, GAV06386.1, GAV06387.1, GAV06390.1, GAV06391.1, GAV06392.1, GAV06691.1
OG0000431	g967.t1, g967.t2	OQV20074.1, OQV20075.1	XP_055343243.1, XP_055343244.1, XP_055343245.1, XP_055343246.1, XP_055343247.1, XP_055343248.1, XP_055343250.1, XP_055343251.1	GAV08009.1, GAV08010.1, GAV08011.1, GAV08012.1, GAV08013.1
OG0000432	g11742.t1, g14813.t1, g14813.t2	OQV18654.1, OQV23093.1, OQV23095.1, OQV23096.1	XP_055348687.1, XP_055348688.1, XP_055348695.1, XP_055352619.1, XP_055352620.1, XP_055352691.1	GAU99071.1, GAV02731.1, GAV02732.1, GAV02733.1
OG0000433	g6650.t1, g6650.t2, g6650.t3	OQV25854.1, OQV25855.1	XP_055347639.1, XP_055347641.1, XP_055347642.1, XP_055347643.1, XP_055347644.1, XP_055347645.1, XP_055347646.1, XP_055347647.1, XP_055347648.1, XP_055347649.1, XP_055347650.1	GAV07718.1
OG0000434	g10048.t1, g10235.t1, g10235.t2, g14292.t1, g15665.t1, g3403.t1, g3404.t1, g3404.t2	OWA52494.1	XP_055329216.1, XP_055329217.1, XP_055329218.1, XP_055329220.1, XP_055329652.1, XP_055329653.1, XP_055350346.1	GAV02260.1
OG0000435	g15704.t1	OWA54349.1	XP_055339875.1, XP_055339876.1, XP_055339877.1, XP_055339878.1, XP_055339879.1, XP_055339880.1, XP_055339881.1, XP_055339883.1, XP_055339884.1, XP_055339885.1, XP_055339886.1, XP_055339887.1, XP_055339888.1	GAU97517.1, GAU97518.1
OG0000436	g1226.t1	OQV16299.1, OQV22532.1, OQV23313.1, OQV25469.1, OWA50753.1, OWA50772.1, OWA51242.1, OWA51243.1	XP_055351201.1, XP_055354015.1, XP_055356577.1	GAU91384.1, GAU91626.1, GAU91627.1, GAU91628.1, GAU95025.1
OG0000437	g12885.t1, g12886.t1, g2834.t1	OQV25226.1, OQV25227.1	XP_055328937.1, XP_055328938.1, XP_055329107.1, XP_055329192.1, XP_055329215.1, XP_055329324.1, XP_055329624.1, XP_055330632.1, XP_055330658.1, XP_055330827.1, XP_055330834.1, XP_055351498.1
OG0000438	g3046.t1	OQV24028.1	XP_055336517.1, XP_055336519.1, XP_055336520.1, XP_055336521.1, XP_055336522.1, XP_055336523.1, XP_055336524.1, XP_055336525.1, XP_055336526.1, XP_055336527.1	GAU89096.1, GAU90614.1, GAU90615.1, GAU90616.1, GAU90617.1
OG0000439		OQV11513.1, OQV18394.1, OQV21617.1, OWA50248.1, OWA51083.1, OWA54817.1	XP_055331410.1, XP_055332549.1, XP_055350751.1, XP_055350752.1, XP_055353419.1, XP_055356416.1, XP_055356433.1, XP_055356434.1, XP_055356440.1, XP_055356441.1, XP_055356451.1
OG0000440		OQV11832.1, OQV19484.1, OQV20023.1, OQV20972.1, OQV22990.1, OQV24623.1, OWA52219.1, OWA53094.1, OWA53407.1, OWA53408.1, OWA53908.1, OWA53909.1, OWA54081.1, OWA54258.1, OWA54380.1, OWA55294.1, OWA55513.1
OG0000441		OQV11955.1, OQV13676.1, OQV13688.1, OQV13691.1, OWA49896.1, OWA53884.1, OWA55069.1		GAU87707.1, GAU89548.1, GAU89549.1, GAU92129.1, GAU92130.1, GAU92444.1, GAU99277.1, GAV00835.1, GAV01648.1, GAV04835.1
OG0000442		OQV12422.1, OQV12425.1, OQV13752.1, OQV13753.1, OQV13765.1, OQV17303.1, OQV19461.1, OQV22609.1, OQV22711.1, OWA52629.1, OWA52642.1, OWA52643.1, OWA53949.1, OWA54669.1, OWA54670.1, OWA54672.1, OWA54905.1
OG0000443		OQV19785.1, OWA50696.1, OWA52049.1, OWA53720.1, OWA55133.1		GAU87115.1, GAU90789.1, GAU94736.1, GAV00760.1, GAV00969.1, GAV02101.1, GAV02102.1, GAV04919.1, GAV04920.1, GAV06335.1, GAV06745.1, GAV08287.1
OG0000444		OQV19805.1	XP_055352176.1, XP_055352178.1, XP_055352179.1, XP_055352180.1, XP_055352181.1, XP_055352182.1, XP_055352203.1, XP_055352204.1, XP_055352205.1, XP_055352207.1, XP_055352208.1, XP_055352209.1, XP_055352218.1, XP_055352219.1, XP_055357938.1	GAU95065.1
OG0000445			XP_055327426.1, XP_055327433.1, XP_055327438.1, XP_055327448.1, XP_055327456.1, XP_055330406.1, XP_055342965.1, XP_055347516.1, XP_055349972.1, XP_055354476.1, XP_055354477.1, XP_055354478.1, XP_055354496.1, XP_055354497.1, XP_055354498.1, XP_055354508.1, XP_055354509.1
OG0000446			XP_055328309.1, XP_055328310.1, XP_055332507.1, XP_055333883.1, XP_055333884.1, XP_055333888.1, XP_055333890.1, XP_055333958.1, XP_055333962.1, XP_055333963.1, XP_055333967.1, XP_055333987.1, XP_055340737.1, XP_055344579.1, XP_055344598.1, XP_055346231.1, XP_055354491.1
OG0000447			XP_055329209.1, XP_055329210.1, XP_055329211.1, XP_055329212.1, XP_055336370.1, XP_055340433.1, XP_055340435.1, XP_055340436.1, XP_055340437.1, XP_055340438.1, XP_055356442.1, XP_055356443.1, XP_055356444.1, XP_055356445.1, XP_055356446.1, XP_055356447.1, XP_055356448.1
OG0000448			XP_055332294.1, XP_055332327.1, XP_055332355.1, XP_055332448.1, XP_055332449.1, XP_055332451.1, XP_055332452.1, XP_055332453.1, XP_055332456.1, XP_055333741.1, XP_055337727.1, XP_055351527.1, XP_055351549.1, XP_055352350.1, XP_055352351.1, XP_055357573.1	GAV00913.1
OG0000449			XP_055334216.1	GAU88596.1, GAU88597.1, GAU97164.1, GAV01385.1, GAV03715.1, GAV03716.1, GAV03803.1, GAV03804.1, GAV08980.1, GAV08981.1, GAV09183.1, GAV09184.1, GAV09185.1, GAV09186.1, GAV09187.1, GAV09188.1
OG0000450			XP_055342045.1, XP_055342046.1, XP_055342047.1, XP_055344399.1, XP_055350910.1, XP_055352000.1, XP_055353484.1, XP_055353517.1, XP_055354366.1, XP_055354367.1, XP_055354368.1, XP_055354370.1, XP_055354371.1, XP_055354377.1, XP_055354378.1, XP_055355617.1, XP_055355618.1
OG0000451	g5696.t1, g5696.t2	OQV15631.1, OQV15633.1	XP_055339755.1, XP_055347133.1, XP_055347150.1	GAU89536.1, GAV00097.1, GAV00415.1, GAV00416.1, GAV00432.1, GAV00669.1, GAV00671.1, GAV02750.1, GAV02751.1
OG0000452	g1938.t1	OQV20021.1, OQV25874.1, OWA55484.1	XP_055337894.1, XP_055340125.1, XP_055340648.1, XP_055340730.1, XP_055352887.1, XP_055353021.1	GAU97793.1, GAU99281.1, GAV01154.1, GAV01362.1, GAV04502.1, GAV09052.1
OG0000453	g10063.t1, g1073.t1, g11259.t1, g182.t1, g8114.t1, g9620.t1	OQV19437.1	XP_055334218.1, XP_055356598.1, XP_055357309.1	GAU90665.1, GAU90666.1, GAV01658.1, GAV06103.1, GAV09137.1, GAV09635.1
OG0000454		OQV11583.1, OQV14507.1, OQV25967.1, OWA50243.1, OWA50505.1, OWA50506.1, OWA50879.1, OWA51023.1, OWA51024.1, OWA51159.1, OWA51167.1, OWA51168.1, OWA51858.1, OWA52901.1, OWA52902.1, OWA52903.1
OG0000455				GAU89655.1, GAU90540.1, GAU90776.1, GAU92461.1, GAU92903.1, GAU96966.1, GAU96979.1, GAU97146.1, GAU97316.1, GAU97317.1, GAV00471.1, GAV01137.1, GAV01138.1, GAV01826.1, GAV03066.1, GAV07953.1
OG0000456	g6942.t1, g6944.t1	OQV13737.1, OQV15783.1, OQV15785.1, OQV15786.1, OQV15787.1, OWA50742.1, OWA51557.1, OWA52897.1, OWA52898.1, OWA53922.1, OWA53923.1, OWA53926.1, OWA54831.1, OWA54833.1
OG0000457	g10415.t1, g11566.t1, g13538.t1, g14.t1, g15.t1, g15579.t1, g493.t1, g4987.t1, g5224.t1, g5964.t1, g7694.t1, g9283.t1	OQV22366.1, OQV24154.1	XP_055335924.1	GAU92391.1
OG0000458	g113.t1, g114.t1, g11594.t1, g11611.t1, g11632.t1, g11804.t1, g12406.t1, g14391.t1, g1527.t1, g3778.t1, g5477.t1, g6730.t1, g6732.t1, g7852.t1, g8422.t1		XP_055330654.1
OG0000459	g13170.t1, g8450.t1	OQV13603.1, OQV16134.1, OQV22015.1, OQV22769.1, OQV25458.1, OQV25460.1	XP_055327964.1, XP_055329435.1, XP_055336513.1, XP_055343147.1, XP_055347332.1, XP_055347335.1	GAU92683.1, GAU92684.1
OG0000460	g13760.t1, g15393.t1, g15393.t2, g5295.t1, g59.t1, g59.t2, g6419.t1, g7464.t1, g7467.t1, g9342.t1, g9457.t1	OWA54193.1	XP_055338442.1, XP_055338445.1, XP_055338611.1, XP_055349780.1
OG0000461	g14561.t1, g2737.t1, g6704.t1		XP_055339288.1, XP_055339372.1, XP_055345171.1, XP_055350807.1, XP_055352872.1, XP_055352873.1, XP_055352874.1, XP_055352875.1, XP_055352876.1, XP_055352877.1, XP_055353198.1, XP_055353199.1, XP_055353247.1
OG0000462	g12236.t1, g12239.t1, g13002.t1, g14866.t1	OQV16708.1, OQV16709.1, OQV16710.1, OQV16712.1, OQV16713.1, OQV16714.1, OWA55465.1	XP_055347679.1, XP_055347680.1, XP_055347776.1, XP_055349153.1	GAU99783.1
OG0000463		OQV14577.1, OQV14580.1, OQV14581.1, OQV14582.1, OQV14587.1, OQV14588.1, OQV14591.1, OQV14914.1, OQV22566.1		GAU94762.1, GAV01461.1, GAV01477.1, GAV01988.1, GAV06782.1, GAV06783.1, GAV07147.1
OG0000464	g14415.t1	OQV13012.1, OQV18693.1, OQV18696.1, OQV18698.1, OWA55094.1	XP_055333222.1, XP_055343212.1, XP_055343327.1, XP_055343328.1, XP_055343329.1, XP_055343330.1, XP_055343405.1, XP_055344111.1, XP_055344112.1	GAV09055.1
OG0000465	g11841.t1		XP_055347824.1, XP_055347826.1, XP_055347827.1, XP_055347828.1, XP_055347829.1, XP_055347830.1, XP_055347831.1, XP_055347832.1, XP_055347851.1, XP_055347865.1, XP_055347866.1, XP_055347903.1, XP_055357458.1, XP_055357558.1, XP_055357559.1
OG0000466	g8148.t1	OQV17295.1, OQV20557.1, OQV23536.1, OWA50725.1, OWA50726.1, OWA50727.1, OWA50728.1, OWA50730.1	XP_055349027.1, XP_055349029.1	GAU99860.1, GAV00375.1, GAV00376.1, GAV00377.1, GAV00378.1
OG0000467	g9859.t1	OQV20608.1, OQV22235.1, OQV24919.1, OWA51321.1, OWA51322.1	XP_055330530.1, XP_055344628.1, XP_055344630.1, XP_055345158.1, XP_055350149.1, XP_055350150.1, XP_055350151.1, XP_055350152.1, XP_055350201.1, XP_055350202.1
OG0000468	g14820.t1, g1995.t1, g5685.t1, g6271.t1, g6271.t2, g7500.t1, g8080.t1	OQV13731.1, OQV16664.1	XP_055332505.1, XP_055337649.1, XP_055337650.1	GAU92321.1, GAU92847.1, GAU92849.1, GAU96471.1
OG0000469	g12696.t1, g1545.t1, g1800.t1, g2821.t1, g5960.t1, g9960.t1	OQV16462.1	XP_055347411.1, XP_055347412.1, XP_055349744.1, XP_055349745.1, XP_055350454.1, XP_055355278.1, XP_055355279.1	GAU99191.1, GAV01031.1
OG0000470	g12995.t1, g14611.t1, g1576.t1, g1760.t1, g1950.t1, g3126.t1, g4608.t1, g5908.t1, g5909.t1, g5913.t1, g6104.t1, g6768.t1, g7636.t1, g8052.t1, g8057.t1, g9975.t1
OG0000471	g1236.t1, g13782.t1, g14899.t1, g15452.t1, g15453.t1, g15522.t1, g2810.t1, g5962.t1, g613.t1, g8173.t1, g8174.t1, g8175.t1, g8977.t1, g9327.t1	OQV12674.1	XP_055346152.1
OG0000472	g11981.t1, g13681.t1, g14069.t1, g14445.t1, g14851.t1, g14852.t1, g14906.t1, g14907.t1, g3442.t1, g7256.t1, g7257.t1, g7892.t1, g8199.t1	OQV23141.1	XP_055353352.1	GAU93692.1
OG0000473	g10425.t1, g11954.t1, g8660.t1, g9256.t1	OQV17567.1, OQV20924.1, OQV24556.1, OQV24606.1, OQV24685.1, OQV24696.1, OWA54131.1	XP_055330046.1, XP_055331976.1, XP_055337276.1, XP_055337278.1	GAV05295.1
OG0000474	g12114.t1	OQV24268.1	XP_055338108.1, XP_055345243.1, XP_055347443.1, XP_055347444.1, XP_055354706.1, XP_055354707.1, XP_055354708.1, XP_055354709.1, XP_055354710.1, XP_055354711.1, XP_055354718.1, XP_055354720.1, XP_055357756.1	GAU95395.1
OG0000475	g12602.t1, g12691.t1, g12894.t1, g12898.t1, g13094.t1, g13943.t1, g4367.t1	OQV15584.1, OQV21543.1, OQV21545.1, OQV21546.1, OWA51248.1	XP_055334384.1	GAU88187.1, GAU88188.1, GAU88189.1
OG0000476	g5835.t1, g7541.t1	OQV19247.1	XP_055336767.1, XP_055336775.1, XP_055336782.1, XP_055336789.1, XP_055336796.1, XP_055336804.1, XP_055336811.1, XP_055336817.1, XP_055336824.1, XP_055336833.1, XP_055336839.1, XP_055336848.1	GAV03085.1
OG0000477	g7062.t1	OQV25954.1, OQV25955.1, OQV25956.1, OQV25957.1	XP_055354200.1, XP_055354201.1, XP_055354202.1, XP_055354203.1, XP_055354204.1, XP_055354205.1, XP_055354207.1	GAU92035.1, GAU92036.1, GAU92037.1, GAU92038.1
OG0000478	g12248.t1	OQV12462.1	XP_055352059.1, XP_055352066.1, XP_055352074.1, XP_055352081.1, XP_055352089.1, XP_055352098.1, XP_055352107.1, XP_055352116.1, XP_055352124.1, XP_055352131.1, XP_055352139.1, XP_055352148.1, XP_055352158.1	GAU96782.1
OG0000479	g12249.t1, g12249.t2	OQV13990.1, OQV25115.1	XP_055327933.1, XP_055327934.1, XP_055327935.1, XP_055327936.1, XP_055350707.1, XP_055350715.1	GAU96813.1, GAU96814.1, GAU96815.1, GAV04276.1, GAV04277.1, GAV04279.1
OG0000480	g1053.t1	OQV21116.1	XP_055327741.1, XP_055327742.1, XP_055327743.1, XP_055327744.1, XP_055327745.1, XP_055327746.1, XP_055327747.1, XP_055327749.1, XP_055327750.1, XP_055327751.1, XP_055327752.1, XP_055327753.1, XP_055327754.1	GAV04433.1
OG0000481	g7498.t1	OQV16319.1, OQV17925.1	XP_055328114.1, XP_055330893.1, XP_055330894.1, XP_055330895.1, XP_055330897.1	GAU89659.1, GAU89660.1, GAU92064.1, GAU92744.1, GAU95148.1, GAU95356.1, GAV04244.1, GAV06862.1
OG0000482	g6610.t1	OQV11853.1, OQV12374.1, OQV21652.1, OQV25209.1, OQV25535.1, OWA53099.1	XP_055354897.1, XP_055356849.1, XP_055357688.1	GAU89698.1, GAU89741.1, GAU89742.1, GAV06664.1, GAV06809.1, GAV06810.1
OG0000483	g7540.t1	OQV17004.1, OQV22119.1, OQV22757.1	XP_055337056.1, XP_055337064.1, XP_055337072.1, XP_055337081.1, XP_055337090.1, XP_055337098.1, XP_055337106.1, XP_055337114.1, XP_055344119.1, XP_055356353.1	GAV01839.1, GAV03086.1
OG0000484	g10278.t1, g3102.t1, g3103.t1, g8397.t1, g8398.t1	OWA50001.1, OWA53586.1, OWA53587.1	XP_055327398.1, XP_055329287.1	GAU95225.1, GAU95227.1, GAU95228.1, GAU95237.1, GAV01069.1, GAV06162.1
OG0000485	g6148.t1, g6149.t1, g6150.t1	OQV18400.1	XP_055332968.1, XP_055336746.1, XP_055336747.1, XP_055336748.1, XP_055336750.1, XP_055351187.1, XP_055351207.1, XP_055351213.1, XP_055351256.1, XP_055351257.1	GAU89812.1, GAU89813.1
OG0000486	g6667.t1	OQV18123.1	XP_055343733.1, XP_055343734.1, XP_055343735.1, XP_055343736.1, XP_055343737.1, XP_055343738.1, XP_055343739.1, XP_055343740.1, XP_055343741.1, XP_055343742.1, XP_055343744.1, XP_055343745.1, XP_055343746.1	GAU96149.1
OG0000487	g6674.t1, g6674.t2, g6674.t3	OQV15827.1, OWA50280.1, OWA50281.1	XP_055345501.1, XP_055345502.1, XP_055345503.1, XP_055345504.1, XP_055345505.1, XP_055345620.1	GAV03274.1, GAV03275.1, GAV05348.1, GAV05349.1
OG0000488	g7945.t1	OQV16412.1, OQV16413.1, OQV16414.1, OQV16415.1, OQV16416.1, OQV21862.1, OWA50373.1	XP_055338404.1, XP_055338405.1, XP_055350555.1, XP_055350559.1, XP_055350560.1, XP_055350561.1	GAV02538.1, GAV02539.1
OG0000489	g9888.t1	OQV22013.1, OQV22014.1, OQV25961.1	XP_055344442.1, XP_055347808.1, XP_055347809.1, XP_055347930.1, XP_055354190.1, XP_055354250.1, XP_055354251.1, XP_055354252.1	GAU92045.1, GAU92046.1, GAU92047.1, GAV07840.1
OG0000490	g11532.t1, g11534.t1	OQV12118.1, OQV12370.1, OQV14885.1, OWA50352.1, OWA50354.1, OWA51111.1, OWA51112.1, OWA52648.1, OWA52650.1, OWA54457.1	XP_055357227.1, XP_055357236.1	GAU95717.1, GAU95718.1
OG0000491	g12007.t1	OQV13792.1, OWA50550.1, OWA50551.1	XP_055327442.1, XP_055327443.1, XP_055327444.1, XP_055327445.1, XP_055328179.1, XP_055328180.1, XP_055331706.1, XP_055331707.1, XP_055331708.1	GAV03479.1, GAV09229.1, GAV09428.1
OG0000492		OQV12420.1, OQV19000.1, OQV19979.1, OQV24986.1, OWA51084.1, OWA51085.1, OWA52633.1, OWA52634.1, OWA52635.1	XP_055337126.1, XP_055337841.1, XP_055337842.1, XP_055337843.1, XP_055344525.1, XP_055345781.1, XP_055354254.1
OG0000493		OQV15579.1, OQV16398.1, OQV26217.1, OWA50217.1, OWA51333.1, OWA52116.1, OWA52117.1, OWA52118.1, OWA52119.1, OWA53560.1, OWA54800.1, OWA54801.1, OWA55151.1, OWA55152.1, OWA55371.1, OWA55720.1
OG0000494			XP_055327157.1, XP_055327236.1, XP_055327320.1, XP_055327395.1, XP_055327474.1, XP_055327560.1, XP_055327640.1, XP_055327718.1, XP_055327801.1, XP_055327879.1, XP_055327962.1, XP_055328040.1, XP_055328127.1, XP_055328200.1, XP_055351245.1, XP_055357948.1
OG0000495			XP_055327229.1, XP_055327240.1, XP_055327900.1, XP_055327924.1, XP_055327997.1, XP_055328160.1, XP_055328204.1, XP_055328263.1, XP_055328319.1, XP_055328354.1, XP_055344494.1, XP_055344495.1, XP_055347273.1, XP_055347306.1, XP_055347308.1, XP_055357906.1
OG0000496			XP_055328519.1, XP_055330713.1, XP_055330714.1, XP_055330715.1, XP_055331655.1, XP_055347300.1, XP_055347301.1, XP_055350347.1, XP_055350424.1, XP_055350499.1, XP_055350569.1, XP_055356253.1, XP_055356254.1, XP_055356257.1, XP_055356258.1, XP_055356259.1
OG0000497			XP_055328825.1, XP_055330498.1, XP_055336432.1, XP_055339093.1, XP_055339251.1, XP_055339252.1, XP_055339279.1, XP_055341432.1, XP_055342619.1, XP_055345066.1, XP_055350337.1, XP_055350343.1, XP_055350344.1, XP_055350400.1, XP_055356271.1, XP_055357532.1
OG0000498			XP_055329700.1, XP_055329701.1, XP_055329702.1, XP_055329703.1, XP_055329704.1, XP_055335744.1, XP_055335745.1, XP_055335746.1, XP_055335747.1, XP_055335748.1, XP_055335749.1, XP_055335760.1, XP_055335783.1, XP_055335784.1, XP_055335785.1, XP_055335786.1
OG0000499			XP_055330062.1, XP_055330068.1, XP_055330400.1, XP_055330838.1, XP_055341851.1, XP_055343682.1, XP_055344539.1, XP_055344543.1, XP_055344544.1, XP_055344545.1, XP_055344546.1, XP_055344610.1, XP_055344621.1, XP_055344623.1, XP_055354800.1, XP_055356502.1
OG0000500			XP_055332399.1, XP_055332401.1, XP_055339096.1, XP_055339127.1, XP_055339128.1, XP_055339129.1, XP_055339130.1, XP_055344866.1, XP_055344867.1, XP_055353446.1, XP_055354822.1, XP_055354824.1, XP_055354825.1, XP_055355094.1, XP_055355112.1, XP_055355113.1
OG0000501			XP_055337484.1, XP_055340766.1, XP_055340767.1, XP_055348673.1, XP_055349195.1, XP_055349196.1, XP_055349197.1, XP_055352723.1, XP_055352724.1, XP_055352740.1, XP_055352759.1, XP_055352772.1, XP_055352773.1, XP_055354344.1, XP_055355744.1, XP_055357875.1
OG0000502				GAU88924.1, GAU88925.1, GAU89146.1, GAU89147.1, GAU89385.1, GAU93489.1, GAU93493.1, GAU93494.1, GAU97833.1, GAV00954.1, GAV04483.1, GAV05613.1, GAV06587.1, GAV06588.1, GAV06589.1, GAV06592.1
OG0000503				GAU92987.1, GAU94024.1, GAU94025.1, GAU97267.1, GAU97268.1, GAU98870.1, GAV01987.1, GAV03640.1, GAV03759.1, GAV03765.1, GAV03766.1, GAV07273.1, GAV07274.1, GAV07275.1, GAV08521.1, GAV09692.1
OG0000504	g13030.t1, g13446.t1, g14490.t1, g15219.t1, g5466.t1, g5977.t1, g7086.t1, g7442.t1, g7882.t1, g8965.t1, g9604.t1	OQV16002.1, OQV23807.1		GAU90755.1, GAU94315.1
OG0000505	g11.t1, g11409.t1, g13648.t1, g2200.t1, g3959.t1, g6491.t1, g7428.t1	OQV13804.1, OQV18043.1, OWA53822.1, OWA55568.1	XP_055337733.1, XP_055350331.1	GAU91856.1, GAV06399.1
OG0000506	g13027.t1, g14560.t1, g2728.t1, g2889.t1, g3021.t1, g3022.t1, g4980.t1, g4982.t1, g5219.t1, g5221.t1, g5250.t1, g7457.t1, g7857.t1			GAV01533.1, GAV01655.1
OG0000507	g10391.t1, g12906.t1, g14653.t1, g15488.t1, g2720.t1, g5279.t1, g5508.t1, g6957.t1, g8231.t1		XP_055327735.1, XP_055337132.1, XP_055340536.1	GAU89454.1, GAU90707.1, GAV01652.1
OG0000508	g2073.t1, g2073.t2, g5640.t1, g8193.t1		XP_055334215.1, XP_055345161.1, XP_055347292.1, XP_055347325.1, XP_055347326.1, XP_055350568.1, XP_055352770.1, XP_055354695.1, XP_055356749.1	GAV09144.1, GAV09630.1
OG0000509	g1217.t1, g15231.t1, g5429.t1, g9631.t1	OQV12552.1, OQV12553.1, OQV14315.1, OQV14316.1, OQV14317.1, OQV14318.1, OQV19009.1, OQV23392.1, OWA49826.1, OWA49827.1, OWA50449.1
OG0000510	g1013.t1, g11034.t1, g14720.t1, g15218.t1, g2684.t1, g3859.t1, g4299.t1, g6438.t1, g6808.t1, g6945.t1, g8357.t1, g8822.t1	OQV16420.1	XP_055351630.1, XP_055351643.1
OG0000511	g11114.t1, g1765.t1, g6253.t1	OQV11589.1, OQV11609.1, OQV20424.1, OQV24087.1, OQV24088.1, OQV26033.1, OWA51180.1, OWA51181.1, OWA53465.1, OWA54850.1	XP_055348203.1	GAV06334.1
OG0000512	g10324.t1	OQV16704.1, OQV16705.1, OQV16706.1, OQV16707.1, OQV18737.1, OQV22243.1, OQV24944.1, OQV24945.1	XP_055328258.1, XP_055337692.1, XP_055337693.1	GAU92841.1, GAU92842.1, GAU92843.1
OG0000513	g7199.t1	OQV19686.1, OQV21056.1, OQV22224.1, OQV24408.1, OQV24409.1, OWA50221.1, OWA51770.1, OWA51784.1	XP_055329200.1, XP_055332865.1, XP_055354008.1	GAV06852.1, GAV09590.1, GAV09591.1
OG0000514	g12403.t1, g12405.t1, g13951.t1, g4901.t1, g4902.t1, g6737.t1, g6739.t1, g6746.t1	OQV22066.1		GAU87323.1, GAU89552.1, GAU89553.1, GAU89554.1, GAU90466.1, GAU90467.1
OG0000515	g11093.t1, g197.t1, g197.t2	OQV19063.1, OQV23350.1, OQV25791.1, OWA50123.1	XP_055344067.1, XP_055344149.1, XP_055345962.1, XP_055350961.1, XP_055354086.1, XP_055354088.1, XP_055354089.1, XP_055356340.1
OG0000516	g9990.t1	OQV16909.1, OQV17874.1, OWA53238.1, OWA53255.1	XP_055330553.1, XP_055337823.1, XP_055337824.1, XP_055337825.1, XP_055338426.1, XP_055338430.1, XP_055338431.1, XP_055348931.1	GAV02197.1, GAV02198.1
OG0000517	g10309.t1	OQV19795.1, OQV23550.1	XP_055343686.1, XP_055356246.1, XP_055356255.1, XP_055356267.1, XP_055356273.1, XP_055356281.1, XP_055357822.1, XP_055357867.1	GAV05105.1, GAV06948.1, GAV06949.1, GAV06952.1
OG0000518	g2051.t1, g348.t1	OQV13051.1, OQV13053.1, OQV13054.1	XP_055341117.1, XP_055341118.1, XP_055341120.1, XP_055341121.1, XP_055341122.1	GAV08258.1, GAV08259.1, GAV08260.1, GAV08261.1, GAV08262.1
OG0000519	g11104.t1, g6129.t1, g878.t1, g9399.t1, g9403.t1	OQV12310.1, OQV14982.1, OQV14983.1, OQV17378.1	XP_055327526.1, XP_055339686.1, XP_055346995.1, XP_055346996.1	GAV06013.1, GAV09489.1
OG0000520	g3106.t1, g9932.t1	OQV13089.1, OQV13091.1, OQV13092.1, OQV16102.1, OQV18858.1, OQV22536.1, OQV22537.1, OQV22540.1, OQV23622.1, OQV23623.1, OQV25003.1	XP_055351238.1, XP_055351240.1
OG0000521	g10674.t1, g10676.t1, g14371.t1, g33.t1	OQV18680.1, OQV18681.1	XP_055352642.1, XP_055352643.1, XP_055352644.1, XP_055352645.1, XP_055352646.1, XP_055352647.1, XP_055352648.1, XP_055352649.1	GAV02743.1
OG0000522	g10426.t1, g11955.t1, g14003.t1, g8659.t1	OQV20926.1, OQV24554.1, OQV24608.1, OWA54134.1	XP_055330337.1, XP_055331884.1, XP_055337279.1, XP_055337280.1	GAU94132.1, GAU94243.1, GAV05298.1
OG0000523	g1206.t1, g791.t1, g792.t1, g792.t2, g793.t1	OQV18826.1, OWA49849.1, OWA49850.1, OWA49851.1	XP_055330850.1, XP_055330851.1, XP_055352241.1, XP_055352242.1	GAU95331.1, GAV07195.1
OG0000524	g9142.t1	OQV18203.1, OWA52694.1, OWA52695.1	XP_055339302.1, XP_055339304.1, XP_055341698.1, XP_055341714.1, XP_055355644.1, XP_055355645.1, XP_055355647.1, XP_055355650.1, XP_055355652.1	GAU96062.1, GAV03023.1
OG0000525	g12093.t1	OQV24301.1	XP_055338141.1, XP_055338143.1, XP_055338144.1, XP_055338145.1, XP_055338146.1, XP_055338147.1, XP_055338148.1, XP_055338149.1, XP_055338150.1, XP_055338151.1, XP_055338152.1, XP_055338153.1	GAU93456.1
OG0000526	g2932.t1	OQV18074.1	XP_055342408.1, XP_055342416.1, XP_055342423.1, XP_055342431.1, XP_055342436.1, XP_055342444.1, XP_055342450.1, XP_055342455.1, XP_055342463.1, XP_055342471.1, XP_055342479.1, XP_055342487.1	GAU98306.1
OG0000527	g8478.t1	OQV22282.1, OQV22283.1	XP_055333473.1, XP_055333484.1, XP_055333493.1, XP_055333502.1, XP_055333509.1, XP_055333518.1	GAV05253.1, GAV05254.1, GAV05255.1, GAV05256.1, GAV05257.1, GAV05259.1
OG0000528	g10427.t1, g11956.t1, g14002.t1	OQV20927.1, OQV24553.1, OQV24609.1, OQV24682.1, OWA54133.1	XP_055330338.1, XP_055331929.1, XP_055337283.1, XP_055337284.1	GAU94133.1, GAU94244.1, GAV05299.1
OG0000529	g12616.t1, g14890.t1, g3955.t1	OQV12389.1	XP_055348753.1, XP_055354745.1	GAU92656.1, GAU96396.1, GAU96397.1, GAU96863.1, GAV00348.1, GAV00349.1, GAV05165.1, GAV09576.1, GAV09762.1
OG0000530	g3203.t1, g3203.t2	OQV21292.1, OQV21293.1, OQV21294.1	XP_055331377.1, XP_055331379.1, XP_055331381.1, XP_055331382.1, XP_055331383.1, XP_055331385.1	GAU87404.1, GAU87405.1, GAU87406.1, GAU87407.1
OG0000531	g12796.t1, g8388.t1	OQV11961.1, OQV18910.1, OQV25650.1	XP_055342158.1, XP_055357570.1	GAU92051.1, GAU92052.1, GAU92053.1, GAU92055.1, GAU92056.1, GAU92057.1, GAU92058.1, GAV00877.1
OG0000532	g2171.t1	OQV24116.1, OWA49932.1	XP_055345971.1, XP_055345972.1, XP_055345973.1, XP_055345975.1, XP_055345976.1, XP_055345977.1, XP_055345978.1, XP_055345979.1, XP_055345980.1, XP_055345981.1	GAU90208.1, GAU90209.1
OG0000533	g7301.t1	OWA52689.1	XP_055346685.1, XP_055346686.1, XP_055346687.1, XP_055348385.1, XP_055352136.1, XP_055353641.1, XP_055353675.1, XP_055353953.1, XP_055353954.1, XP_055356614.1, XP_055356615.1	GAU96025.1, GAU96026.1
OG0000534	g8680.t1, g8682.t1	OQV14435.1	XP_055331114.1, XP_055331141.1, XP_055331162.1, XP_055339476.1, XP_055339478.1, XP_055339479.1, XP_055339480.1, XP_055339481.1, XP_055339603.1, XP_055339696.1	GAU92710.1, GAV05738.1
OG0000535	g13832.t1	OQV12117.1, OQV13643.1, OQV14359.1	XP_055348791.1, XP_055348792.1, XP_055348793.1, XP_055348794.1, XP_055348796.1, XP_055355201.1	GAU99218.1, GAV00221.1, GAV02502.1, GAV04749.1, GAV04751.1
OG0000536	g4947.t1	OWA51659.1	XP_055356214.1, XP_055356216.1, XP_055356217.1, XP_055356218.1, XP_055356219.1, XP_055356220.1, XP_055356879.1	GAV01087.1, GAV01173.1, GAV01180.1, GAV03722.1, GAV09912.1, GAV10009.1
OG0000537	g5036.t1, g5036.t2, g7273.t1, g7273.t2	OWA50438.1	XP_055327218.1, XP_055327219.1, XP_055327220.1, XP_055327221.1, XP_055327222.1, XP_055327223.1, XP_055327224.1	GAU95711.1, GAU95712.1, GAU95713.1
OG0000538	g5188.t1	OQV22969.1, OWA52713.1, OWA52714.1, OWA52715.1	XP_055332062.1, XP_055332215.1, XP_055338434.1, XP_055338637.1, XP_055338638.1, XP_055342910.1, XP_055342911.1	GAU93087.1, GAV06227.1, GAV06687.1
OG0000539	g5190.t1	OQV16137.1, OQV19835.1, OQV19836.1, OQV26115.1, OWA55505.1	XP_055337735.1, XP_055338639.1, XP_055355659.1, XP_055355660.1, XP_055355662.1	GAU91631.1, GAU91634.1, GAU91638.1, GAU94494.1
OG0000540	g11088.t1, g11088.t2	OWA50608.1	XP_055357827.1, XP_055357829.1, XP_055357830.1, XP_055357831.1, XP_055357832.1, XP_055357833.1, XP_055357834.1, XP_055357835.1, XP_055357836.1, XP_055357837.1, XP_055357838.1	GAU95393.1
OG0000541		OQV11500.1	XP_055330710.1, XP_055330739.1, XP_055330799.1, XP_055339059.1, XP_055339181.1, XP_055344532.1, XP_055344540.1, XP_055344569.1, XP_055344576.1, XP_055344580.1, XP_055344591.1, XP_055344592.1, XP_055344606.1	GAU94562.1
OG0000542		OQV12760.1, OQV15773.1, OQV19451.1, OQV23028.1, OQV23059.1, OQV26170.1, OWA52522.1, OWA53873.1, OWA54282.1	XP_055349889.1	GAU87205.1, GAU90558.1, GAV01095.1, GAV03060.1, GAV08790.1
OG0000543		OQV17937.1, OQV22017.1, OQV22018.1, OQV22019.1, OQV22955.1, OWA50701.1, OWA50702.1, OWA50703.1, OWA50704.1, OWA51113.1, OWA51115.1, OWA51116.1, OWA52249.1, OWA52250.1	XP_055341369.1
OG0000544		OQV20695.1, OQV21352.1, OQV24388.1, OQV24389.1, OQV24390.1, OWA53808.1, OWA54561.1, OWA54562.1	XP_055329915.1, XP_055336575.1, XP_055337350.1, XP_055339072.1, XP_055345824.1	GAU89853.1, GAV09663.1
OG0000545		OWA50405.1	XP_055329842.1, XP_055329846.1, XP_055329889.1, XP_055348547.1, XP_055351547.1, XP_055351819.1, XP_055351827.1, XP_055353243.1, XP_055353251.1, XP_055356484.1, XP_055357979.1, XP_055357980.1	GAV06203.1, GAV06204.1
OG0000546			XP_055329795.1, XP_055347329.1, XP_055347346.1, XP_055347398.1, XP_055347409.1, XP_055349118.1, XP_055349142.1, XP_055349177.1, XP_055349185.1, XP_055352924.1, XP_055352934.1, XP_055352937.1, XP_055352938.1, XP_055355911.1, XP_055355912.1
OG0000547			XP_055330917.1, XP_055330918.1, XP_055330919.1, XP_055330920.1, XP_055330921.1, XP_055330922.1, XP_055330923.1, XP_055330924.1, XP_055330925.1, XP_055330926.1, XP_055330927.1, XP_055331036.1, XP_055331037.1, XP_055331038.1, XP_055331039.1
OG0000548			XP_055340606.1, XP_055340608.1, XP_055340609.1, XP_055340741.1, XP_055340742.1, XP_055340745.1, XP_055344122.1, XP_055344126.1, XP_055344141.1, XP_055344186.1, XP_055344187.1, XP_055348165.1, XP_055350393.1, XP_055350402.1, XP_055350419.1
OG0000549			XP_055341799.1, XP_055341800.1, XP_055341801.1, XP_055341802.1, XP_055341803.1, XP_055341892.1, XP_055352567.1, XP_055352568.1, XP_055352569.1, XP_055352570.1, XP_055352571.1, XP_055352572.1, XP_055352573.1, XP_055352574.1, XP_055352575.1
OG0000550			XP_055342196.1, XP_055342197.1, XP_055352294.1, XP_055354129.1, XP_055354715.1, XP_055354716.1, XP_055354717.1, XP_055355042.1, XP_055355043.1, XP_055355044.1, XP_055355148.1, XP_055356813.1, XP_055357494.1, XP_055357495.1, XP_055357496.1
OG0000551			XP_055344108.1, XP_055344150.1, XP_055345164.1, XP_055346626.1, XP_055346627.1, XP_055346628.1, XP_055346629.1, XP_055346813.1, XP_055346814.1, XP_055346967.1, XP_055346969.1, XP_055349619.1, XP_055354103.1, XP_055356229.1, XP_055356230.1
OG0000552				GAU88095.1, GAU88096.1, GAU88932.1, GAU90374.1, GAU92424.1, GAU97353.1, GAU98429.1, GAU99409.1, GAU99412.1, GAU99413.1, GAU99415.1, GAV05705.1, GAV05706.1, GAV05707.1, GAV07650.1
OG0000553				GAU89094.1, GAU99309.1, GAU99310.1, GAV04150.1, GAV04867.1, GAV05813.1, GAV06070.1, GAV07042.1, GAV08527.1, GAV09133.1, GAV09134.1, GAV09135.1, GAV09216.1, GAV09633.1, GAV09994.1
OG0000554				GAU89308.1, GAU89309.1, GAU89378.1, GAU89381.1, GAU92478.1, GAU94839.1, GAU97828.1, GAU99058.1, GAU99826.1, GAU99896.1, GAV01619.1, GAV01685.1, GAV01734.1, GAV08572.1, GAV09362.1
OG0000555				GAU90099.1, GAU90101.1, GAU90157.1, GAU90158.1, GAU90159.1, GAV01175.1, GAV03721.1, GAV03785.1, GAV03880.1, GAV09898.1, GAV09944.1, GAV10012.1, GAV10020.1, GAV10032.1, GAV10036.1
OG0000556				GAU97034.1, GAU99759.1, GAU99760.1, GAU99800.1, GAU99801.1, GAU99802.1, GAU99803.1, GAU99804.1, GAU99805.1, GAU99806.1, GAU99807.1, GAU99808.1, GAU99810.1, GAU99853.1, GAV04817.1
OG0000557	g12231.t1	OQV13766.1, OQV23074.1, OQV23076.1, OWA50386.1, OWA50466.1, OWA52253.1, OWA52254.1, OWA52985.1, OWA54568.1, OWA55000.1, OWA55106.1		GAU90476.1, GAU90507.1
OG0000558	g15174.t1, g3184.t1, g6309.t1		XP_055330449.1, XP_055330450.1, XP_055330451.1, XP_055330452.1, XP_055330453.1, XP_055330455.1, XP_055330456.1, XP_055330457.1, XP_055336346.1, XP_055336354.1, XP_055336362.1
OG0000559	g11261.t1	OQV19778.1, OWA52273.1, OWA52278.1, OWA52279.1, OWA52280.1, OWA52281.1, OWA54318.1, OWA54319.1, OWA54320.1	XP_055333041.1, XP_055345942.1, XP_055345944.1	GAV01434.1
OG0000560	g1238.t1, g12781.t1, g12782.t1, g2505.t1, g293.t1, g4654.t1, g4728.t1, g5711.t1, g5921.t1, g8618.t1	OQV12260.1, OQV13654.1, OWA49808.1, OWA52923.1
OG0000561	g10962.t1, g11148.t1, g12620.t1, g1844.t1, g2562.t1, g2562.t2, g747.t1, g747.t2, g874.t1	OQV17610.1, OQV17611.1	XP_055336231.1, XP_055339029.1	GAV03884.1
OG0000562	g9031.t1, g9035.t1	OQV23269.1, OWA52787.1, OWA52788.1, OWA53108.1	XP_055336562.1, XP_055343784.1, XP_055354347.1	GAU89340.1, GAU89341.1, GAU89342.1, GAU96657.1, GAU96658.1
OG0000563	g10408.t1, g12272.t1, g13496.t1, g13580.t1, g13581.t1, g4306.t1, g4306.t2, g4347.t1, g5056.t1, g5057.t1, g559.t1, g5725.t1, g6456.t1		XP_055346934.1
OG0000564	g2132.t1	OQV21043.1, OQV24936.1, OQV24937.1	XP_055332727.1, XP_055332729.1, XP_055332730.1, XP_055332731.1, XP_055335707.1, XP_055335834.1, XP_055335855.1, XP_055335856.1, XP_055335857.1, XP_055335859.1
OG0000565	g11370.t1, g3811.t1, g6567.t1, g79.t1	OQV16401.1, OQV16402.1, OQV16403.1, OQV16404.1, OWA53232.1, OWA53233.1, OWA53237.1	XP_055350449.1, XP_055350450.1	GAV02562.1
OG0000566	g4311.t1, g8475.t1	OQV12689.1, OQV22279.1	XP_055339623.1, XP_055339624.1, XP_055339715.1, XP_055339716.1, XP_055340011.1	GAV05271.1, GAV05272.1, GAV05722.1, GAV05723.1, GAV05724.1
OG0000567	g2201.t1	OQV17550.1, OQV17551.1, OQV21789.1, OWA51014.1	XP_055338751.1, XP_055338752.1, XP_055338753.1, XP_055338754.1, XP_055354860.1	GAU88693.1, GAU88695.1, GAV01111.1, GAV06301.1
OG0000568	g13407.t1, g13781.t1, g14260.t1, g14261.t1, g3164.t1, g6779.t1, g6780.t1, g7243.t1	OQV11514.1, OWA50096.1	XP_055334223.1	GAU91055.1, GAV02864.1, GAV02865.1
OG0000569	g10360.t1, g15232.t1, g7619.t1	OQV12375.1, OQV12376.1, OQV18191.1, OQV19910.1, OQV19911.1	XP_055342552.1, XP_055343235.1, XP_055349001.1	GAU96478.1, GAU96479.1, GAU96480.1
OG0000570	g12215.t1, g13955.t1, g1834.t1, g2032.t1, g2032.t2, g3856.t1, g7225.t1		XP_055349477.1	GAU87677.1, GAU90761.1, GAV09888.1, GAV09889.1, GAV09908.1, GAV09919.1
OG0000571	g11908.t1, g12410.t1, g2715.t1, g3745.t1, g4781.t1, g640.t1, g6713.t1, g6776.t1, g760.t1, g8192.t1		XP_055332079.1, XP_055332080.1, XP_055350338.1, XP_055357052.1
OG0000572	g13312.t1, g14854.t1, g14861.t1, g14930.t1, g15566.t1, g15569.t1, g9480.t1	OQV22828.1, OQV22829.1, OQV22830.1, OQV22831.1, OQV22832.1, OQV22833.1, OQV22835.1
OG0000573	g13783.t1	OQV11801.1, OQV24890.1	XP_055337681.1, XP_055349926.1, XP_055351499.1, XP_055351500.1, XP_055351501.1, XP_055351502.1, XP_055351503.1, XP_055351505.1, XP_055351506.1, XP_055351507.1, XP_055351508.1
OG0000574	g2306.t1, g2651.t1, g451.t1, g6563.t1, g8042.t1, g9431.t1, g983.t1	OQV19252.1, OQV22531.1, OWA55129.1, OWA55130.1	XP_055341921.1, XP_055341946.1, XP_055352288.1
OG0000575	g11242.t1, g11243.t1, g12579.t1, g1594.t1, g2063.t1, g2064.t1, g2986.t1, g2987.t1, g3089.t1, g3090.t1, g4258.t1, g4931.t1, g835.t1	OQV24573.1
OG0000576	g7455.t1	OQV22020.1, OQV22021.1, OWA50921.1, OWA50922.1, OWA50923.1, OWA52251.1, OWA55065.1, OWA55066.1, OWA55067.1, OWA55068.1	XP_055329697.1, XP_055329716.1, XP_055353870.1
OG0000577	g9978.t1	OQV14572.1, OQV14573.1, OQV16101.1, OQV21667.1, OQV22932.1, OQV22933.1, OQV22934.1, OQV22935.1	XP_055345793.1	GAU95604.1, GAU95605.1, GAU95769.1, GAU95770.1
OG0000578	g4438.t1	OQV23791.1, OQV23792.1	XP_055331830.1, XP_055331831.1, XP_055331832.1, XP_055331833.1, XP_055331835.1, XP_055331836.1, XP_055331949.1, XP_055331950.1	GAU97413.1, GAU97414.1, GAU97415.1
OG0000579	g4462.t1	OQV11985.1, OQV12518.1, OQV12519.1, OQV12520.1	XP_055331426.1, XP_055331427.1, XP_055331428.1, XP_055335655.1, XP_055335656.1, XP_055335657.1	GAU92090.1, GAU92091.1, GAU97821.1
OG0000580	g10561.t1, g1083.t1, g13195.t1, g13196.t1, g13201.t1, g13204.t1, g13221.t1, g15189.t1, g15190.t1, g5666.t1	OWA50416.1	XP_055357244.1, XP_055357253.1	GAU95001.1
OG0000581	g13009.t1, g13009.t2, g13239.t1, g14719.t1, g3887.t1	OQV23203.1, OQV23204.1	XP_055338293.1, XP_055338294.1, XP_055338295.1, XP_055338296.1, XP_055338297.1	GAV01214.1, GAV01215.1
OG0000582	g13079.t1, g14698.t1, g2592.t1, g2593.t1, g458.t1, g7501.t1, g7853.t1, g8600.t1, g9938.t1	OQV26214.1	XP_055337600.1	GAU92661.1, GAV01897.1, GAV01898.1
OG0000583	g5326.t1	OQV16327.1, OQV18239.1, OWA54991.1	XP_055333257.1, XP_055333258.1, XP_055333259.1, XP_055333261.1, XP_055337582.1, XP_055337583.1, XP_055337651.1, XP_055337652.1	GAU92825.1, GAU97175.1
OG0000584	g5839.t1	OQV13891.1	XP_055346587.1, XP_055346588.1, XP_055346589.1, XP_055346590.1, XP_055346591.1, XP_055346592.1, XP_055346593.1, XP_055346594.1, XP_055346595.1, XP_055346730.1, XP_055346731.1	GAV01699.1
OG0000585	g7995.t1	OQV17439.1, OQV17440.1, OQV18607.1, OQV22572.1, OQV22575.1, OQV24979.1, OWA55545.1	XP_055343343.1, XP_055345454.1	GAU92940.1, GAU93187.1, GAV03331.1, GAV03332.1
OG0000586	g8533.t1	OQV19302.1, OQV19303.1, OWA51729.1	XP_055335833.1, XP_055335842.1, XP_055335849.1, XP_055335858.1, XP_055335866.1, XP_055335874.1, XP_055335882.1, XP_055335891.1, XP_055335899.1	GAV08954.1
OG0000587	g14684.t1	OWA50518.1	XP_055328423.1, XP_055328425.1, XP_055328426.1, XP_055328427.1, XP_055328428.1, XP_055328429.1, XP_055328430.1, XP_055328431.1, XP_055328432.1	GAV03447.1, GAV03448.1, GAV03449.1
OG0000588	g15539.t1, g3540.t1, g5191.t1, g5256.t1, g7263.t1, g8559.t1, g9345.t1	OQV15153.1, OQV16135.1, OQV19456.1, OQV25651.1, OWA54279.1	XP_055352135.1	GAU92337.1
OG0000589	g9429.t1	OQV12314.1	XP_055341027.1, XP_055341070.1, XP_055341071.1, XP_055341072.1, XP_055341073.1, XP_055341074.1, XP_055341232.1, XP_055341233.1, XP_055341234.1, XP_055341235.1, XP_055341236.1	GAV01784.1
OG0000590	g8692.t1	OQV18789.1, OQV18790.1	XP_055330481.1, XP_055330482.1, XP_055330483.1, XP_055330484.1, XP_055330485.1, XP_055353842.1, XP_055353843.1, XP_055353845.1, XP_055353846.1, XP_055355301.1	GAV00607.1
OG0000591	g9415.t1	OQV23596.1, OQV23598.1	XP_055337826.1, XP_055337850.1, XP_055337851.1, XP_055337881.1, XP_055337892.1, XP_055337956.1, XP_055349950.1, XP_055357274.1, XP_055357276.1	GAU88770.1, GAU88772.1
OG0000592	g12778.t1	OQV22644.1, OQV25718.1	XP_055333885.1, XP_055338739.1, XP_055338740.1, XP_055338741.1, XP_055352428.1, XP_055352429.1, XP_055352430.1	GAU88577.1, GAU90136.1, GAV04584.1, GAV07064.1
OG0000593	g15708.t1, g15708.t2	OQV22375.1, OQV22376.1	XP_055339868.1, XP_055339869.1, XP_055339870.1, XP_055339871.1, XP_055339872.1, XP_055339873.1	GAU97521.1, GAU97522.1, GAU97524.1, GAU97525.1
OG0000594	g10446.t1, g10447.t1, g13974.t1, g13975.t1, g3027.t1, g3028.t1, g4004.t1, g4005.t1, g5229.t1, g5230.t1	OQV14472.1, OQV14473.1, OWA51310.1	XP_055353014.1
OG0000595	g4683.t1	OQV15201.1, OQV15202.1	XP_055334875.1, XP_055334877.1, XP_055334878.1, XP_055334879.1, XP_055334880.1, XP_055334881.1, XP_055334882.1, XP_055334883.1, XP_055334884.1	GAV07054.1, GAV07055.1
OG0000596	g6926.t1, g6926.t2	OQV16172.1, OQV16173.1	XP_055343453.1, XP_055343454.1, XP_055343455.1, XP_055343457.1, XP_055343458.1, XP_055343459.1, XP_055343460.1, XP_055343461.1, XP_055343462.1	GAV01583.1
OG0000597	g7268.t1	OWA53013.1, OWA53015.1, OWA53027.1, OWA54946.1	XP_055341389.1, XP_055341625.1, XP_055341626.1, XP_055343713.1, XP_055343714.1, XP_055347501.1	GAU88951.1, GAU89978.1, GAU91053.1
OG0000598	g13099.t1	OQV14738.1, OQV16105.1, OQV16131.1, OQV16132.1, OQV17074.1, OQV17902.1, OQV22819.1, OWA50237.1, OWA50497.1, OWA51946.1, OWA53028.1	XP_055327693.1	GAV09543.1
OG0000599		OQV11674.1, OQV14872.1, OQV14875.1, OQV19075.1, OQV22672.1, OWA50346.1, OWA50347.1, OWA51118.1, OWA53395.1	XP_055347034.1	GAU89550.1, GAV02827.1, GAV06261.1, GAV06262.1
OG0000600		OQV13203.1, OQV13644.1, OQV16324.1, OQV16325.1, OQV16784.1, OQV19646.1, OQV20663.1, OWA54524.1, OWA54527.1, OWA54557.1	XP_055346815.1, XP_055350809.1, XP_055353170.1, XP_055353172.1
OG0000601		OQV13758.1, OQV13759.1, OQV13760.1, OQV13761.1, OQV13762.1, OQV13763.1, OQV13764.1, OWA52012.1, OWA52014.1, OWA54036.1, OWA54037.1, OWA54038.1, OWA54273.1, OWA54673.1
OG0000602		OQV13962.1, OQV13963.1	XP_055336437.1, XP_055336438.1, XP_055336439.1, XP_055336441.1, XP_055336442.1, XP_055336443.1	GAU92523.1, GAU94320.1, GAU94321.1, GAU94322.1, GAU94323.1, GAU94324.1
OG0000603		OQV14207.1, OQV17265.1, OQV17266.1, OQV19514.1, OQV19515.1, OQV23101.1, OQV23102.1, OWA51152.1, OWA51176.1, OWA51280.1, OWA52778.1, OWA54397.1, OWA54890.1		GAU87706.1
OG0000604		OQV15767.1, OQV15768.1, OQV15803.1, OQV15804.1, OQV15806.1, OQV17687.1, OQV18365.1, OQV22686.1, OWA51702.1, OWA52702.1, OWA52807.1, OWA52881.1, OWA52888.1		GAU97323.1
OG0000605		OQV16271.1, OQV17239.1, OQV17241.1, OQV18589.1, OQV19598.1, OQV20280.1, OQV20281.1, OQV23916.1, OWA54948.1, OWA54949.1, OWA54950.1, OWA54951.1, OWA54952.1	XP_055337251.1
OG0000606		OQV16438.1, OQV17070.1, OQV17072.1, OQV19744.1, OQV19746.1, OQV20976.1, OQV25618.1, OWA51675.1, OWA52509.1, OWA52510.1, OWA54574.1, OWA54577.1, OWA54578.1, OWA54579.1
OG0000607		OQV17696.1, OQV17698.1, OQV17699.1, OQV17700.1, OWA52162.1, OWA52163.1, OWA52164.1, OWA52165.1, OWA52171.1, OWA52173.1, OWA53544.1	XP_055337347.1, XP_055357823.1	GAV08405.1
OG0000608		OWA52091.1, OWA52122.1, OWA52124.1, OWA52125.1, OWA52126.1, OWA52127.1, OWA52129.1, OWA52132.1, OWA52133.1, OWA52135.1, OWA54028.1, OWA54146.1, OWA54154.1, OWA54155.1
OG0000609			XP_055329761.1, XP_055329762.1, XP_055329845.1, XP_055340225.1, XP_055340226.1, XP_055340257.1, XP_055340258.1, XP_055340259.1, XP_055340260.1, XP_055340271.1, XP_055340310.1, XP_055356172.1	GAV07437.1, GAV07438.1
OG0000610			XP_055333867.1, XP_055333868.1, XP_055333869.1, XP_055344573.1, XP_055346097.1, XP_055346098.1, XP_055348365.1, XP_055349150.1, XP_055349151.1, XP_055349152.1, XP_055355797.1, XP_055355798.1, XP_055355799.1, XP_055356820.1
OG0000611			XP_055335069.1, XP_055345181.1, XP_055345182.1, XP_055345189.1, XP_055345191.1, XP_055345193.1, XP_055345195.1, XP_055345196.1, XP_055345197.1, XP_055345198.1, XP_055345199.1, XP_055350293.1, XP_055353149.1, XP_055353153.1
OG0000612			XP_055355407.1, XP_055355536.1, XP_055355537.1, XP_055355538.1, XP_055355539.1, XP_055355540.1, XP_055355541.1, XP_055355542.1, XP_055355544.1, XP_055355545.1, XP_055355546.1, XP_055355547.1, XP_055355548.1, XP_055356381.1
OG0000613				GAU87216.1, GAU87217.1, GAU87475.1, GAU87476.1, GAU87477.1, GAU87520.1, GAU90218.1, GAU90358.1, GAU90359.1, GAV01894.1, GAV09167.1, GAV09168.1, GAV09570.1, GAV09861.1
OG0000614				GAU88930.1, GAU88931.1, GAU89077.1, GAU89078.1, GAU94705.1, GAU96818.1, GAV00218.1, GAV00930.1, GAV01212.1, GAV01521.1, GAV02641.1, GAV02824.1, GAV08020.1, GAV08906.1
OG0000615				GAU89927.1, GAU99927.1, GAU99946.1, GAU99951.1, GAU99952.1, GAU99953.1, GAU99954.1, GAU99958.1, GAU99969.1, GAV00022.1, GAV01449.1, GAV06750.1, GAV06807.1, GAV08501.1
OG0000616				GAU91460.1, GAU94524.1, GAU94525.1, GAU94526.1, GAU94527.1, GAU94528.1, GAU94529.1, GAU94530.1, GAU94533.1, GAV02907.1, GAV06393.1, GAV08167.1, GAV08985.1, GAV09864.1
OG0000617	g10551.t1	OWA50476.1, OWA50477.1, OWA50478.1, OWA53298.1, OWA53300.1, OWA53302.1, OWA53305.1, OWA53307.1, OWA53309.1, OWA54172.1	XP_055340289.1	GAV00381.1
OG0000618	g12230.t1, g15564.t1, g1598.t1, g2069.t1, g2981.t1, g3094.t1, g375.t1, g7507.t1			GAU90657.1, GAU90725.1, GAV06893.1, GAV09148.1, GAV09626.1
OG0000619	g10225.t1, g10227.t1, g10229.t1, g10230.t1, g11489.t1, g11491.t2, g14390.t1, g3621.t1, g5263.t1, g6167.t1, g634.t1, g635.t1, g9657.t1
OG0000620	g11434.t1, g11745.t1, g14346.t1, g1973.t1, g3546.t1, g3546.t2, g5301.t1, g6920.t1	OWA50019.1, OWA51839.1	XP_055350153.1	GAU95012.1, GAU99423.1
OG0000621	g12874.t1, g2411.t1, g3167.t1, g7475.t1	OQV17911.1, OQV22649.1, OQV25594.1, OQV25596.1, OQV25598.1, OQV25599.1, OQV25600.1	XP_055334066.1	GAU94538.1
OG0000622	g1058.t1, g10634.t1	OQV16020.1, OQV18318.1, OQV18319.1, OQV18320.1, OQV18370.1, OQV19454.1, OWA52749.1, OWA52750.1	XP_055354276.1, XP_055355089.1	GAU91168.1
OG0000623	g10122.t1, g10637.t1, g4579.t1, g8953.t1			GAU87427.1, GAU87858.1, GAU89897.1, GAU90654.1, GAU91241.1, GAV02761.1, GAV05604.1, GAV05605.1, GAV06895.1
OG0000624	g3526.t1, g9498.t1	OQV13011.1, OQV13015.1, OQV13016.1, OQV13017.1, OQV13019.1, OQV13020.1, OQV13656.1, OQV13657.1, OWA55095.1, OWA55096.1		GAV08135.1
OG0000625	g1235.t1	OQV12724.1, OQV14468.1, OQV15123.1, OQV16810.1, OQV16811.1, OWA50805.1, OWA50806.1, OWA50840.1, OWA50841.1, OWA52538.1, OWA52539.1, OWA52540.1
OG0000626	g14011.t1, g3850.t1, g4899.t1, g6299.t1, g6734.t1, g6736.t1, g8839.t1, g8839.t2, g9863.t1	OQV24572.1	XP_055332791.1, XP_055354893.1	GAV00924.1
OG0000627	g2225.t1, g2675.t1	OQV19818.1, OQV21673.1, OWA53687.1, OWA53688.1, OWA54739.1, OWA54740.1	XP_055348120.1, XP_055354083.1	GAV06452.1, GAV06453.1, GAV06461.1
OG0000628	g4396.t1, g4397.t1	OQV21583.1, OQV21584.1, OQV21585.1	XP_055338784.1, XP_055338785.1, XP_055338786.1, XP_055338788.1, XP_055338789.1, XP_055338790.1	GAU88245.1, GAU88248.1
OG0000629	g10205.t1, g13167.t1, g3043.t1	OQV22413.1, OQV23573.1	XP_055335380.1, XP_055346207.1, XP_055347914.1, XP_055347933.1, XP_055350289.1, XP_055355143.1	GAU93667.1, GAU97569.1
OG0000630	g9987.t1	OQV16017.1, OQV17606.1, OQV22079.1, OWA52637.1, OWA52638.1, OWA54712.1, OWA54714.1, OWA54715.1	XP_055345538.1, XP_055354487.1, XP_055354488.1, XP_055356994.1
OG0000631	g11155.t1, g13014.t1, g13757.t1, g13971.t1, g14058.t1, g2005.t1, g2084.t1, g2644.t1, g2766.t1, g6450.t1, g6948.t1, g9052.t1	OQV16159.1
OG0000632	g13114.t1, g15526.t1, g15527.t1, g15528.t1, g8462.t1		XP_055332314.1, XP_055335718.1, XP_055336577.1, XP_055338429.1, XP_055344261.1, XP_055344268.1, XP_055354235.1, XP_055354236.1
OG0000633	g10508.t1, g8858.t1	OQV11870.1, OQV11871.1, OWA54872.1, OWA54874.1	XP_055329807.1, XP_055329808.1, XP_055346413.1, XP_055352931.1, XP_055353902.1	GAU87513.1, GAU96431.1
OG0000634	g10971.t1, g10971.t2, g13706.t1, g27.t1, g4865.t1, g4866.t1, g8177.t1, g8179.t1, g8297.t1, g837.t1	OQV13878.1	XP_055336459.1	GAV01830.1
OG0000635	g13991.t1, g296.t1, g3163.t1, g3163.t2	OQV20649.1	XP_055351849.1, XP_055351864.1, XP_055351865.1, XP_055351866.1, XP_055351868.1, XP_055351869.1	GAV00689.1, GAV00690.1
OG0000636	g10485.t1, g10954.t1, g12362.t1, g1311.t1, g14726.t1, g2494.t1, g8421.t1, g843.t1, g8460.t1	OQV23374.1, OWA54239.1	XP_055331826.1	GAV03318.1
OG0000637	g12081.t1, g12081.t2, g6197.t1	OQV11527.1, OWA51944.1	XP_055327536.1, XP_055327537.1, XP_055341422.1, XP_055341423.1, XP_055356875.1, XP_055356876.1, XP_055356877.1	GAU91794.1
OG0000638	g13016.t1, g1322.t1, g3582.t1	OQV18273.1	XP_055332047.1, XP_055332048.1, XP_055332049.1, XP_055332111.1	GAU97434.1, GAU97435.1, GAU97436.1, GAU97437.1, GAU97438.1
OG0000639	g11771.t1, g2584.t1	OQV13139.1, OQV17326.1	XP_055335333.1, XP_055344996.1, XP_055345067.1	GAU91079.1, GAU91365.1, GAU91366.1, GAU91679.1, GAV02720.1, GAV02721.1
OG0000640	g10565.t1, g11210.t1, g11824.t1, g14127.t1, g15362.t1, g6693.t1, g8272.t1	OQV11738.1	XP_055342250.1	GAU93856.1, GAU93857.1, GAU93858.1, GAU93859.1
OG0000641	g10493.t1, g3132.t1, g804.t1, g805.t1, g808.t1	OQV12403.1, OQV16108.1, OQV22793.1, OQV22794.1	XP_055336592.1, XP_055336778.1, XP_055346216.1	GAV08263.1
OG0000642	g10103.t1, g14728.t1, g2603.t1	OQV16352.1, OQV18163.1, OWA51866.1, OWA51867.1, OWA51868.1, OWA51869.1, OWA51870.1, OWA51871.1		GAU94919.1, GAU96123.1
OG0000643	g4445.t1, g4445.t2, g4445.t3, g4445.t4	OQV13652.1, OQV13653.1	XP_055332250.1, XP_055332251.1, XP_055332252.1	GAU97042.1, GAU97043.1, GAU97044.1, GAU97045.1
OG0000644	g4470.t1	OQV11700.1	XP_055335644.1, XP_055335645.1, XP_055335646.1, XP_055335647.1, XP_055335649.1, XP_055335650.1, XP_055335651.1, XP_055335652.1, XP_055335653.1, XP_055335654.1	GAU97815.1
OG0000645	g14966.t1, g7172.t1	OQV19331.1, OQV19332.1	XP_055333373.1, XP_055333381.1, XP_055333390.1, XP_055333400.1, XP_055333408.1, XP_055333417.1, XP_055333423.1	GAU98050.1, GAV08791.1
OG0000646	g13207.t1	OQV17587.1	XP_055338896.1, XP_055338897.1, XP_055338898.1, XP_055338899.1, XP_055338900.1, XP_055338901.1	GAU88636.1, GAU88637.1, GAU88638.1, GAU88639.1, GAU88640.1
OG0000647	g15864.t1	OQV12606.1, OQV12608.1, OQV12609.1, OQV12610.1, OQV17854.1	XP_055342662.1, XP_055342670.1, XP_055342678.1, XP_055342686.1, XP_055342695.1	GAU98196.1, GAU98197.1
OG0000648	g2537.t1	OQV11675.1, OQV11676.1, OQV11677.1, OQV11678.1, OQV24548.1	XP_055344705.1, XP_055344706.1, XP_055344707.1, XP_055344708.1	GAU92074.1, GAU92075.1, GAU92076.1
OG0000649	g3274.t1	OQV17166.1	XP_055339969.1, XP_055339970.1, XP_055339971.1, XP_055339972.1, XP_055339973.1, XP_055339974.1, XP_055339975.1, XP_055339977.1, XP_055339978.1, XP_055339979.1	GAV07792.1
OG0000650	g4055.t1	OWA52229.1	XP_055340522.1, XP_055340523.1, XP_055340524.1, XP_055340525.1, XP_055340526.1, XP_055340527.1, XP_055340528.1, XP_055340529.1, XP_055340530.1, XP_055340531.1	GAV02491.1
OG0000651	g5336.t1	OQV22461.1, OQV22462.1, OQV22464.1, OQV22465.1, OQV22466.1, OQV22467.1, OQV22468.1	XP_055335569.1, XP_055335570.1, XP_055335571.1, XP_055335572.1	GAU97598.1
OG0000652	g7020.t1	OQV18994.1, OQV18995.1, OQV18997.1, OWA54638.1, OWA54639.1, OWA54641.1, OWA55396.1, OWA55397.1	XP_055353357.1, XP_055353358.1, XP_055353360.1	GAU93701.1
OG0000653	g8003.t1	OQV14505.1	XP_055347062.1, XP_055347063.1, XP_055347064.1, XP_055347065.1, XP_055347066.1, XP_055347067.1, XP_055347143.1, XP_055347157.1, XP_055350750.1, XP_055352859.1	GAV03864.1
OG0000654	g10587.t1	OQV23510.1	XP_055332752.1, XP_055332753.1, XP_055332754.1, XP_055332756.1, XP_055332757.1, XP_055357609.1, XP_055357611.1, XP_055357612.1, XP_055357613.1, XP_055357614.1	GAV05023.1
OG0000655	g2470.t1, g2517.t1, g6540.t1, g8081.t1	OQV12554.1, OQV22689.1, OWA51964.1, OWA52228.1, OWA52640.1, OWA53794.1, OWA53796.1, OWA53797.1, OWA55684.1
OG0000656	g1244.t1, g14289.t1, g14290.t1, g4247.t1, g4251.t1, g4267.t1, g5026.t1, g8385.t1	OQV12315.1, OWA55430.1	XP_055339229.1, XP_055339240.1	GAU87697.1
OG0000657	g4726.t1	OQV17657.1, OQV17664.1, OQV23691.1	XP_055327558.1	GAV09023.1, GAV09024.1, GAV09025.1, GAV09464.1, GAV09465.1, GAV09656.1, GAV09657.1, GAV09658.1
OG0000658	g5410.t1	OWA53263.1, OWA53264.1	XP_055351695.1, XP_055351696.1, XP_055351697.1, XP_055351698.1, XP_055351699.1, XP_055351701.1, XP_055351702.1	GAV06522.1, GAV06523.1, GAV06524.1
OG0000659	g11139.t1, g13336.t1, g14406.t1, g1474.t1, g4959.t1, g6801.t1	OQV17421.1, OQV22893.1	XP_055328693.1	GAV06341.1, GAV06342.1, GAV08188.1, GAV08189.1
OG0000660	g9840.t1	OQV17104.1, OWA51626.1	XP_055329823.1, XP_055329824.1, XP_055329826.1, XP_055340108.1, XP_055340109.1, XP_055340110.1, XP_055344817.1, XP_055344839.1	GAU98659.1, GAU98660.1
OG0000661	g10157.t1	OQV16487.1, OQV16488.1	XP_055339505.1, XP_055339506.1, XP_055339507.1, XP_055339508.1	GAV04340.1, GAV04341.1, GAV04342.1, GAV04343.1, GAV04344.1, GAV04345.1
OG0000662	g14417.t1, g14419.t1, g2803.t1, g4972.t1, g5768.t1, g8982.t1	OQV14247.1, OQV16353.1, OQV23081.1, OQV24946.1, OQV25602.1	XP_055337127.1	GAU88741.1
OG0000663	g1166.t1, g1166.t2, g1166.t3	OQV18784.1, OWA53451.1	XP_055335156.1, XP_055335158.1, XP_055335159.1, XP_055335160.1, XP_055341428.1	GAU97770.1, GAV01800.1, GAV01801.1
OG0000664	g6832.t1	OQV14054.1, OQV16333.1	XP_055334865.1, XP_055334866.1, XP_055334868.1, XP_055334869.1, XP_055334870.1, XP_055337762.1, XP_055337763.1	GAU94401.1, GAU94402.1, GAU99688.1
OG0000665	g8676.t1	OQV14431.1, OQV17153.1	XP_055339561.1, XP_055339562.1, XP_055339564.1, XP_055339565.1, XP_055339566.1, XP_055351124.1	GAU98716.1, GAU98717.1, GAV05067.1, GAV05742.1
OG0000666	g12548.t1, g12548.t2, g12548.t3	OQV15481.1, OQV15482.1, OQV15483.1, OQV15484.1	XP_055355100.1, XP_055355101.1	GAV00288.1, GAV00289.1, GAV00290.1, GAV00291.1
OG0000667	g431.t1	OQV12807.1, OQV12808.1, OQV12809.1, OQV12810.1, OQV12815.1, OWA55655.1	XP_055354593.1, XP_055354594.1	GAV02634.1, GAV02635.1, GAV06536.1, GAV06995.1
OG0000668	g1488.t1	OWA52195.1, OWA52677.1, OWA52682.1, OWA52684.1, OWA54651.1, OWA54652.1, OWA54658.1	XP_055340070.1, XP_055340071.1, XP_055340072.1, XP_055340073.1	GAV07931.1
OG0000669	g1569.t1	OQV15037.1, OQV19906.1, OQV19907.1, OQV19908.1, OQV19909.1, OWA50943.1, OWA50951.1, OWA50959.1, OWA52451.1, OWA53763.1	XP_055338550.1	GAU96505.1
OG0000670	g1876.t1	OQV17950.1, OQV17951.1, OQV17952.1, OQV17953.1, OQV17954.1, OQV17955.1, OQV17956.1, OWA55553.1	XP_055352268.1, XP_055352275.1, XP_055352281.1	GAU87492.1
OG0000671	g2003.t1, g2003.t2, g9662.t1	OWA51303.1, OWA51304.1, OWA51305.1	XP_055327244.1, XP_055327245.1, XP_055327246.1, XP_055327247.1, XP_055327248.1	GAU98629.1, GAU98630.1
OG0000672	g4914.t1	OQV14818.1	XP_055331561.1, XP_055331562.1, XP_055331563.1, XP_055331564.1, XP_055331565.1, XP_055331566.1, XP_055331567.1, XP_055331568.1, XP_055331570.1, XP_055331571.1	GAU99467.1
OG0000673	g5525.t1	OQV19342.1	XP_055337741.1, XP_055337750.1, XP_055337757.1, XP_055337765.1, XP_055337772.1, XP_055337779.1, XP_055337787.1	GAU98044.1, GAU98045.1, GAU98046.1, GAU98047.1
OG0000674	g10955.t1, g11366.t1, g12039.t1, g5700.t1, g6721.t1, g6722.t1, g9638.t1	OQV25629.1	XP_055329736.1, XP_055334023.1	GAU91874.1, GAU94289.1, GAU94290.1
OG0000675	g6147.t1, g8950.t1	OQV16179.1, OQV18857.1, OWA51660.1, OWA52863.1		GAV01088.1, GAV01179.1, GAV01499.1, GAV03693.1, GAV03717.1, GAV03723.1, GAV09911.1
OG0000676	g6969.t1	OQV15361.1	XP_055343278.1, XP_055343279.1, XP_055343280.1, XP_055343281.1, XP_055343282.1, XP_055343284.1, XP_055343285.1, XP_055343286.1, XP_055343287.1, XP_055343288.1	GAV01081.1
OG0000677	g7481.t1	OQV17670.1	XP_055336942.1, XP_055336943.1, XP_055336944.1, XP_055336945.1, XP_055336946.1, XP_055336947.1, XP_055336948.1, XP_055336949.1	GAU89277.1, GAU94543.1, GAV09690.1
OG0000678	g12240.t1	OQV13500.1, OQV13501.1, OQV13504.1, OQV21639.1, OQV21640.1, OQV21641.1	XP_055328881.1, XP_055348689.1, XP_055348690.1	GAU94844.1, GAU94870.1, GAU98730.1
OG0000679	g1939.t1	OQV14362.1, OQV14363.1, OWA54240.1, OWA54886.1, OWA55001.1, OWA55002.1	XP_055327386.1, XP_055330522.1, XP_055348006.1	GAU89259.1, GAU89397.1, GAU90477.1
OG0000680		OQV12214.1, OQV21743.1, OWA50362.1, OWA54000.1, OWA54001.1, OWA54090.1, OWA54844.1, OWA55111.1	XP_055336340.1, XP_055339110.1, XP_055351541.1	GAU91574.1, GAU97086.1
OG0000681		OQV12527.1, OQV13613.1, OQV13614.1, OQV13618.1, OQV17103.1, OQV20008.1, OQV23098.1, OQV23809.1, OWA50504.1, OWA50510.1, OWA53548.1, OWA54798.1		GAV05155.1
OG0000682		OQV14994.1	XP_055328229.1, XP_055337014.1, XP_055340279.1, XP_055342571.1, XP_055344902.1, XP_055345231.1, XP_055345232.1, XP_055347868.1, XP_055348539.1, XP_055349825.1, XP_055356570.1, XP_055356807.1
OG0000683		OQV15403.1, OQV20813.1, OQV26045.1	XP_055344414.1, XP_055349708.1, XP_055349709.1, XP_055349710.1, XP_055349711.1, XP_055349712.1, XP_055349713.1, XP_055349819.1	GAU92280.1, GAV01881.1
OG0000684		OQV17417.1, OQV17418.1, OQV17419.1	XP_055338411.1, XP_055338593.1, XP_055338594.1, XP_055338597.1, XP_055338598.1, XP_055338599.1, XP_055338600.1, XP_055346908.1	GAV08349.1, GAV08363.1
OG0000685		OQV20916.1	XP_055331160.1, XP_055331254.1, XP_055332286.1, XP_055342569.1, XP_055344393.1, XP_055344430.1, XP_055344431.1, XP_055344672.1, XP_055348559.1, XP_055354765.1, XP_055355976.1, XP_055355979.1
OG0000686		OQV23010.1, OWA50233.1, OWA50238.1, OWA50239.1, OWA50241.1, OWA50242.1, OWA50244.1, OWA50245.1, OWA51286.1, OWA51287.1, OWA55086.1, OWA55087.1, OWA55493.1
OG0000687		OQV23769.1	XP_055342503.1, XP_055342504.1, XP_055342505.1, XP_055342506.1, XP_055342507.1, XP_055342508.1, XP_055342510.1, XP_055342511.1, XP_055342512.1	GAU89039.1, GAU89040.1, GAU89041.1
OG0000688		OQV25180.1	XP_055328121.1, XP_055328122.1, XP_055328123.1, XP_055328124.1, XP_055328125.1, XP_055328126.1, XP_055328128.1, XP_055328129.1, XP_055328130.1, XP_055328131.1, XP_055328132.1	GAV04181.1
OG0000689		OWA52194.1, OWA52681.1, OWA53662.1		GAU90602.1, GAU90604.1, GAU92968.1, GAU92969.1, GAU92970.1, GAU93651.1, GAU95844.1, GAU95991.1, GAU96566.1, GAV05325.1
OG0000690		OWA53371.1	XP_055330409.1, XP_055330416.1, XP_055330424.1, XP_055330430.1, XP_055330437.1, XP_055330445.1, XP_055330454.1, XP_055330461.1, XP_055330468.1, XP_055330474.1, XP_055330479.1, XP_055330488.1
OG0000691		OWA55485.1	XP_055334693.1, XP_055339370.1, XP_055340732.1, XP_055342138.1, XP_055353283.1, XP_055357199.1	GAU88987.1, GAU98201.1, GAU98820.1, GAU98821.1, GAV00946.1, GAV06777.1
OG0000692			XP_055328296.1, XP_055329732.1, XP_055329913.1, XP_055333006.1, XP_055333007.1, XP_055333008.1, XP_055339197.1, XP_055343126.1, XP_055343127.1, XP_055343159.1, XP_055351663.1, XP_055352316.1, XP_055356510.1
OG0000693			XP_055329047.1, XP_055332713.1, XP_055337122.1, XP_055337197.1, XP_055337229.1, XP_055337231.1, XP_055337232.1, XP_055337295.1, XP_055337322.1, XP_055348270.1, XP_055348271.1, XP_055348272.1, XP_055348366.1
OG0000694			XP_055329050.1, XP_055329252.1, XP_055329778.1, XP_055338458.1, XP_055338570.1, XP_055338571.1, XP_055338572.1, XP_055340519.1, XP_055342279.1, XP_055351777.1, XP_055351780.1, XP_055354732.1, XP_055356174.1
OG0000695			XP_055329604.1, XP_055329718.1, XP_055331154.1, XP_055331155.1, XP_055338606.1, XP_055340593.1, XP_055340776.1, XP_055340777.1, XP_055340778.1, XP_055341211.1, XP_055346188.1, XP_055348148.1, XP_055348170.1
OG0000696			XP_055329656.1, XP_055329657.1, XP_055329658.1, XP_055330507.1, XP_055354770.1	GAU90712.1, GAU90713.1, GAU91678.1, GAU92095.1, GAU99939.1, GAV05492.1, GAV06388.1, GAV06505.1
OG0000697			XP_055330217.1, XP_055330219.1, XP_055330288.1, XP_055330385.1, XP_055330427.1, XP_055355807.1, XP_055355808.1, XP_055355809.1, XP_055355815.1, XP_055355816.1, XP_055355817.1, XP_055355818.1, XP_055355819.1
OG0000698			XP_055330782.1, XP_055353269.1, XP_055353270.1, XP_055353271.1, XP_055353272.1, XP_055353274.1, XP_055353289.1, XP_055353291.1, XP_055353292.1, XP_055353295.1, XP_055353296.1, XP_055353297.1, XP_055353298.1
OG0000699			XP_055332528.1, XP_055332529.1, XP_055347226.1, XP_055347227.1, XP_055347228.1, XP_055352021.1, XP_055353413.1, XP_055353414.1, XP_055353416.1, XP_055355609.1, XP_055357362.1, XP_055357363.1, XP_055357476.1
OG0000700			XP_055335773.1, XP_055340984.1, XP_055340985.1, XP_055341003.1, XP_055345280.1, XP_055348327.1, XP_055348329.1, XP_055348330.1, XP_055348406.1, XP_055348407.1, XP_055348409.1, XP_055348410.1, XP_055356470.1
OG0000701			XP_055341494.1, XP_055341496.1, XP_055341497.1, XP_055341498.1, XP_055341499.1, XP_055341500.1, XP_055341675.1, XP_055341676.1, XP_055341677.1, XP_055344691.1, XP_055344932.1, XP_055348945.1, XP_055353267.1
OG0000702			XP_055347243.1, XP_055347244.1, XP_055347258.1, XP_055347259.1, XP_055347260.1, XP_055349692.1, XP_055350228.1, XP_055350245.1, XP_055353137.1, XP_055353474.1, XP_055355610.1, XP_055355611.1, XP_055356284.1
OG0000703				GAU89290.1, GAU89291.1, GAU90484.1, GAU90485.1, GAU94078.1, GAU94081.1, GAU99648.1, GAV01435.1, GAV01436.1, GAV01495.1, GAV03554.1, GAV03555.1, GAV03556.1
OG0000704				GAU91625.1, GAU92191.1, GAU92401.1, GAU95018.1, GAU96912.1, GAU99968.1, GAV01291.1, GAV02806.1, GAV05130.1, GAV06004.1, GAV06364.1, GAV08310.1, GAV08913.1
OG0000705	g8084.t1			GAU89114.1, GAU91583.1, GAU91618.1, GAU91619.1, GAU91843.1, GAU92490.1, GAU95613.1, GAU95614.1, GAV01848.1, GAV03708.1, GAV04586.1
OG0000706	g1334.t1, g2862.t1, g4962.t1, g5542.t1, g6974.t1	OQV14727.1, OWA55258.1	XP_055348249.1, XP_055356812.1, XP_055357449.1, XP_055357450.1, XP_055357451.1
OG0000707	g12688.t1, g4742.t1	OQV14460.1, OQV14461.1, OQV24169.1, OWA54227.1, OWA54394.1	XP_055349775.1, XP_055349785.1, XP_055356187.1, XP_055356188.1, XP_055356746.1
OG0000708	g11859.t1, g12986.t1, g12988.t1, g13617.t1, g2274.t1, g2762.t1, g340.t1, g6235.t1, g64.t1, g6679.t1, g8835.t1	OWA55398.1
OG0000709	g11472.t1, g13276.t1, g13804.t1, g14447.t1, g14631.t1, g15506.t1, g2394.t1, g4125.t1, g5646.t1, g6239.t1, g6473.t1		XP_055332333.1
OG0000710	g10492.t1, g12313.t1, g14068.t1, g14281.t1, g3362.t1, g3712.t1	OQV19533.1	XP_055332544.1, XP_055332551.1, XP_055332558.1, XP_055335967.1, XP_055340727.1
OG0000711		OWA51530.1	XP_055332274.1, XP_055332386.1, XP_055332387.1, XP_055332389.1, XP_055332390.1, XP_055332391.1, XP_055332435.1, XP_055341950.1, XP_055347781.1, XP_055352524.1, XP_055356843.1
OG0000712	g10625.t1, g11279.t1, g11753.t1, g13692.t1, g299.t1, g3448.t1, g6247.t1, g700.t1, g7657.t1, g7795.t1	OWA54416.1		GAU90655.1
OG0000713		OQV14871.1, OQV14888.1, OQV23359.1, OWA52418.1, OWA52518.1, OWA52519.1	XP_055331092.1, XP_055331093.1, XP_055340726.1	GAU90650.1, GAU90651.1, GAU96982.1
OG0000714	g11374.t1, g11375.t1, g11376.t1, g648.t1, g6978.t1, g842.t1, g844.t1	OQV17032.1, OQV17033.1, OWA51744.1, OWA52415.1, OWA54402.1
OG0000715	g15677.t1	OQV13155.1, OQV13552.1, OQV13553.1, OQV13554.1, OQV13555.1, OQV13556.1, OQV24899.1, OQV24901.1, OQV25304.1, OWA55174.1	XP_055328745.1
OG0000716	g15679.t1	OQV13153.1, OWA50473.1, OWA51149.1, OWA51974.1, OWA51975.1	XP_055338396.1	GAU98993.1, GAU98994.1, GAU99325.1, GAU99326.1, GAU99327.1
OG0000717	g8271.t1	OWA52326.1, OWA52327.1	XP_055334493.1, XP_055334494.1, XP_055334495.1, XP_055334496.1, XP_055334497.1	GAU87997.1, GAU87998.1, GAU87999.1, GAU88000.1
OG0000718	g3632.t1	OQV25295.1	XP_055327608.1, XP_055327609.1, XP_055327610.1, XP_055327611.1, XP_055327613.1	GAV03979.1, GAV03980.1, GAV03981.1, GAV03982.1, GAV03983.1
OG0000719	g408.t1, g4301.t1	OWA53387.1	XP_055354547.1, XP_055354548.1, XP_055354549.1, XP_055354550.1, XP_055354606.1	GAU98758.1, GAU98759.1, GAU98766.1, GAV07499.1
OG0000720	g11519.t1	OQV17328.1, OQV17329.1, OQV17331.1, OQV17332.1, OQV17333.1, OQV17334.1, OQV17335.1	XP_055333730.1	GAU91548.1, GAU91876.1, GAU92446.1
OG0000721	g1257.t1, g15249.t1, g1901.t1, g8363.t1, g985.t1	OQV17719.1, OQV23564.1	XP_055346880.1	GAU90490.1, GAU95548.1, GAV08327.1, GAV08328.1
OG0000722	g12241.t1, g4110.t1, g9373.t1	OQV24258.1	XP_055352002.1, XP_055352003.1, XP_055352005.1, XP_055352006.1, XP_055352007.1, XP_055352008.1, XP_055352009.1	GAU93404.1
OG0000723	g14858.t1, g496.t1	OQV20609.1, OQV20614.1, OQV20642.1, OQV24171.1, OQV24172.1, OQV24175.1, OWA51458.1, OWA54438.1	XP_055348893.1, XP_055348894.1
OG0000724	g10147.t1, g12564.t1, g12565.t1		XP_055332478.1, XP_055332480.1, XP_055332481.1, XP_055332482.1, XP_055332483.1, XP_055332484.1, XP_055349964.1	GAU93749.1, GAV08162.1
OG0000725	g305.t1	OQV23327.1	XP_055337079.1, XP_055337080.1, XP_055337082.1, XP_055337083.1, XP_055337084.1, XP_055337085.1, XP_055337086.1, XP_055337087.1	GAU91052.1, GAV06593.1
OG0000726	g3618.t1, g3619.t1, g3620.t1, g6277.t1	OQV24765.1	XP_055346327.1, XP_055346328.1, XP_055346329.1, XP_055346330.1, XP_055346331.1	GAV08065.1, GAV08066.1
OG0000727	g6710.t1	OQV17882.1, OQV17883.1, OQV24731.1	XP_055336710.1, XP_055344467.1, XP_055344479.1, XP_055347310.1, XP_055348419.1, XP_055349563.1, XP_055349602.1	GAU91150.1
OG0000728	g13816.t1, g2464.t1, g3644.t1, g3838.t1, g8915.t1	OQV23361.1	XP_055330414.1, XP_055341951.1, XP_055343080.1, XP_055349951.1, XP_055353049.1, XP_055357325.1
OG0000729	g11480.t1, g11481.t1, g11483.t1, g2601.t1, g7624.t1, g7630.t1, g8630.t1	OQV23363.1, OQV23365.1, OQV23366.1, OQV23367.1, OWA52739.1
OG0000730	g17.t1, g186.t1, g2072.t1, g2890.t1, g3023.t1, g4115.t1, g4983.t1, g511.t1, g5222.t1, g5249.t1		XP_055336729.1	GAV09628.1
OG0000731	g9420.t1	OQV14176.1, OQV14179.1, OQV14180.1	XP_055341813.1, XP_055341814.1, XP_055341815.1, XP_055357108.1, XP_055357109.1, XP_055357110.1	GAU87878.1, GAU96306.1
OG0000732	g12512.t1, g13304.t1, g5947.t1, g5953.t1, g9475.t1, g9697.t1	OQV23369.1	XP_055329374.1, XP_055341191.1	GAU97285.1, GAU97286.1, GAV01821.1
OG0000733	g11648.t1, g13004.t1, g13489.t1, g13490.t1, g13765.t1, g14474.t1	OQV12581.1, OQV12582.1, OQV12583.1, OWA54324.1	XP_055351810.1	GAU88999.1
OG0000734	g10290.t1, g11796.t1, g13987.t1, g14345.t1, g14639.t1, g14950.t1, g5048.t1, g6701.t1, g7476.t1, g7633.t1, g850.t1, g9527.t1
OG0000735	g13123.t1, g13124.t1, g13879.t1, g14576.t1, g14577.t1, g14904.t1, g3064.t1, g3065.t1, g707.t1, g7717.t1, g7794.t1, g7799.t1
OG0000736	g13946.t1, g770.t1, g771.t1	OQV13389.1, OQV13390.1, OQV13391.1, OQV13392.1	XP_055349409.1, XP_055349410.1, XP_055349411.1, XP_055349412.1	GAU96546.1
OG0000737	g4450.t1	OQV11680.1, OQV24861.1, OWA54523.1, OWA54528.1	XP_055327189.1, XP_055341757.1, XP_055341764.1, XP_055347400.1, XP_055354436.1, XP_055354501.1	GAV06648.1
OG0000738	g7169.t1	OQV19385.1, OQV19386.1, OQV19387.1	XP_055330030.1, XP_055330040.1, XP_055341610.1, XP_055341619.1	GAU92292.1, GAU97995.1, GAU97996.1, GAU98000.1
OG0000739	g9139.t1	OQV17521.1, OQV17522.1	XP_055345699.1, XP_055345702.1, XP_055345703.1, XP_055345704.1, XP_055345705.1, XP_055345706.1, XP_055345707.1, XP_055345708.1	GAV01270.1
OG0000740	g10767.t1, g10809.t1, g14388.t1, g4415.t1, g4564.t1	OQV21612.1, OWA49862.1, OWA49863.1, OWA49864.1	XP_055338676.1	GAU88286.1, GAU91773.1
OG0000741	g12185.t1	OQV23953.1, OQV23954.1	XP_055342826.1, XP_055342827.1, XP_055342937.1, XP_055342938.1, XP_055342939.1, XP_055343007.1, XP_055343008.1	GAU93321.1, GAU93322.1
OG0000742	g11087.t1, g11562.t1, g11572.t1, g571.t1		XP_055338951.1, XP_055338953.1, XP_055338954.1	GAU88896.1, GAU88897.1, GAU88898.1, GAU88899.1, GAU88904.1
OG0000743	g3346.t1		XP_055344652.1, XP_055347582.1, XP_055347591.1, XP_055348951.1, XP_055357305.1	GAU99304.1, GAU99516.1, GAU99517.1, GAV03400.1, GAV03401.1, GAV07614.1
OG0000744	g4360.t1	OQV15471.1, OQV21663.1, OQV21901.1, OQV21902.1, OWA52800.1	XP_055334830.1, XP_055357619.1, XP_055357620.1, XP_055357621.1	GAU88179.1, GAU88180.1
OG0000745	g5060.t1, g5060.t2	OQV25184.1, OQV25185.1	XP_055328406.1, XP_055328407.1, XP_055328408.1, XP_055328409.1, XP_055328410.1, XP_055328411.1	GAV04147.1, GAV04148.1
OG0000746	g7046.t1, g7046.t2	OQV18956.1, OQV18957.1, OQV18958.1	XP_055353367.1, XP_055353368.1, XP_055353369.1, XP_055353370.1, XP_055356091.1	GAU93727.1, GAU93728.1
OG0000747	g7767.t1	OQV11474.1	XP_055338005.1, XP_055338006.1, XP_055338007.1, XP_055338008.1, XP_055338181.1, XP_055338182.1, XP_055338183.1, XP_055338184.1, XP_055338185.1	GAV04460.1
OG0000748	g8158.t1	OQV18441.1, OQV18442.1	XP_055355526.1, XP_055355527.1, XP_055355530.1, XP_055357153.1, XP_055357154.1, XP_055357155.1, XP_055357447.1	GAV00407.1, GAV00408.1
OG0000749	g2623.t1, g2624.t1, g8338.t1	OQV26207.1	XP_055337459.1, XP_055337573.1, XP_055337574.1, XP_055337575.1, XP_055337576.1, XP_055337577.1, XP_055337578.1	GAU92612.1
OG0000750	g6233.t1, g9771.t1	OQV21890.1, OQV21891.1, OQV21897.1, OQV21898.1, OQV21899.1, OQV21991.1, OWA51548.1	XP_055354426.1, XP_055357825.1	GAU96649.1
OG0000751	g10704.t1, g10704.t2	OQV21312.1	XP_055331449.1, XP_055331450.1, XP_055331451.1, XP_055331452.1, XP_055331453.1, XP_055331454.1, XP_055331455.1	GAU87380.1, GAU87381.1
OG0000752	g10751.t1	OQV13754.1, OQV13755.1, OQV13756.1, OQV15922.1	XP_055331327.1, XP_055331366.1	GAU88105.1, GAU88594.1, GAU88595.1, GAU88599.1, GAU97401.1
OG0000753	g13996.t1	OQV24615.1, OQV24617.1, OWA55641.1	XP_055332768.1, XP_055332769.1, XP_055332770.1	GAU94229.1, GAU94230.1, GAU94231.1, GAU94232.1, GAU94233.1
OG0000754	g14010.t1, g14010.t2	OQV24570.1, OQV24571.1	XP_055332725.1, XP_055332726.1, XP_055354872.1, XP_055354873.1, XP_055354875.1, XP_055354876.1	GAU94111.1, GAU94112.1
OG0000755	g15536.t1, g3578.t1, g6794.t1	OQV17432.1, OQV17433.1, OWA51756.1, OWA51757.1, OWA51758.1	XP_055342637.1, XP_055342808.1, XP_055350380.1	GAU92524.1
OG0000756	g15622.t1	OQV14231.1	XP_055331277.1, XP_055331278.1, XP_055331279.1, XP_055331280.1, XP_055331281.1, XP_055331282.1, XP_055331283.1	GAU91017.1, GAU91018.1, GAU91019.1
OG0000757	g145.t1	OQV16294.1	XP_055339882.1, XP_055339892.1, XP_055339901.1, XP_055339909.1, XP_055339916.1, XP_055339926.1, XP_055339935.1, XP_055339944.1, XP_055339952.1	GAV03575.1
OG0000758	g150.t1	OQV18117.1	XP_055335016.1, XP_055335024.1, XP_055335032.1, XP_055335039.1, XP_055335048.1, XP_055335055.1, XP_055335063.1, XP_055335070.1, XP_055335077.1	GAU98348.1
OG0000759	g1076.t1	OQV20866.1, OWA52214.1, OWA55361.1	XP_055337179.1, XP_055337180.1, XP_055337181.1, XP_055337182.1, XP_055337183.1, XP_055337184.1	GAU99494.1, GAV01569.1
OG0000760	g1975.t1	OQV24790.1	XP_055346462.1, XP_055346463.1, XP_055346464.1, XP_055346465.1, XP_055346466.1, XP_055346467.1, XP_055346468.1, XP_055346469.1, XP_055346470.1	GAU97269.1
OG0000761	g12376.t1, g12376.t2, g2521.t1, g6035.t1, g6036.t1, g7599.t1, g8294.t1, g8294.t2	OQV17301.1	XP_055346266.1, XP_055346313.1	GAU89266.1
OG0000762	g3924.t1	OQV16883.1, OQV16996.1, OQV22774.1	XP_055339601.1	GAV02187.1, GAV05166.1, GAV09793.1, GAV09857.1, GAV09859.1, GAV09862.1, GAV10080.1
OG0000763	g4695.t1, g4695.t2	OQV22939.1	XP_055353062.1, XP_055353063.1, XP_055353064.1, XP_055353065.1, XP_055353066.1, XP_055353067.1, XP_055353068.1, XP_055353069.1	GAV00439.1
OG0000764	g5451.t1	OQV15701.1	XP_055333585.1, XP_055333586.1, XP_055333587.1, XP_055333588.1, XP_055333589.1, XP_055333590.1, XP_055333591.1, XP_055333592.1, XP_055333593.1	GAV00988.1
OG0000765	g11668.t1, g7261.t1, g7262.t1, g9951.t1	OQV15323.1, OQV17352.1, OQV17354.1	XP_055351941.1	GAV00056.1, GAV00057.1, GAV00058.1, GAV00059.1
OG0000766	g10385.t1, g10385.t2	OQV24883.1, OQV24884.1, OQV24885.1	XP_055346303.1, XP_055346304.1, XP_055346305.1, XP_055346306.1, XP_055346307.1	GAU97361.1, GAU97362.1
OG0000767	g14140.t1	OQV12156.1, OQV21070.1	XP_055327705.1, XP_055327706.1, XP_055327707.1, XP_055327708.1, XP_055327709.1, XP_055346164.1	GAV05567.1, GAV05568.1, GAV05690.1
OG0000768	g15002.t1	OQV15503.1	XP_055330302.1, XP_055330303.1, XP_055330304.1, XP_055330305.1, XP_055330306.1, XP_055330307.1, XP_055330308.1, XP_055330309.1	GAV00158.1, GAV00159.1
OG0000769	g15745.t1, g8717.t1	OQV19418.1	XP_055339814.1, XP_055339815.1, XP_055339816.1, XP_055339817.1, XP_055339818.1, XP_055339819.1, XP_055339820.1, XP_055339821.1	GAV05814.1
OG0000770	g11209.t1, g2100.t1, g2100.t2, g8234.t1	OQV26258.1, OQV26259.1	XP_055332441.1, XP_055337598.1	GAU92362.1, GAU92363.1, GAU92364.1, GAU92365.1
OG0000771	g11974.t1, g11974.t2	OQV23760.1, OQV23761.1, OQV23762.1	XP_055336825.1, XP_055336826.1, XP_055336827.1, XP_055336828.1, XP_055336829.1	GAV01375.1, GAV01376.1
OG0000772	g13071.t1	OQV15187.1, OQV24539.1, OWA51386.1, OWA52075.1, OWA52622.1	XP_055327776.1, XP_055327777.1, XP_055341184.1, XP_055341185.1	GAV03718.1, GAV09807.1
OG0000773	g73.t1	OQV14677.1	XP_055329402.1, XP_055329403.1, XP_055329404.1, XP_055329405.1, XP_055329406.1, XP_055329407.1, XP_055329408.1, XP_055329410.1, XP_055329411.1	GAV02288.1
OG0000774	g907.t1	OQV19731.1	XP_055329069.1, XP_055329070.1, XP_055329071.1, XP_055329072.1, XP_055329073.1, XP_055343450.1, XP_055343451.1, XP_055343452.1, XP_055343582.1	GAV00073.1
OG0000775	g3409.t1	OWA50225.1, OWA50226.1, OWA50227.1	XP_055343971.1, XP_055343972.1, XP_055343973.1, XP_055343974.1, XP_055343975.1	GAV04809.1, GAV04810.1, GAV08239.1
OG0000776	g13558.t1, g3490.t1	OQV12692.1, OQV19601.1, OQV19667.1, OQV20080.1, OQV23559.1	XP_055333887.1, XP_055342733.1, XP_055353637.1, XP_055353639.1	GAU92117.1
OG0000777	g3563.t1	OQV20555.1	XP_055341332.1, XP_055341341.1, XP_055341349.1, XP_055341356.1, XP_055341365.1, XP_055341374.1, XP_055341382.1, XP_055341390.1, XP_055341399.1	GAV00235.1
OG0000778	g4179.t1	OQV20466.1	XP_055333595.1, XP_055333596.1, XP_055333597.1, XP_055333600.1, XP_055333601.1, XP_055333602.1, XP_055333603.1, XP_055333604.1, XP_055333605.1	GAU98533.1
OG0000779	g5952.t1	OQV13805.1, OWA53214.1	XP_055335984.1, XP_055335985.1, XP_055335986.1, XP_055335987.1, XP_055335988.1, XP_055335989.1, XP_055335990.1, XP_055335991.1	GAV02990.1
OG0000780	g15214.t1, g9803.t1	OQV20814.1	XP_055341107.1, XP_055341108.1, XP_055341109.1, XP_055341110.1, XP_055341111.1	GAV01570.1, GAV01573.1, GAV01875.1, GAV01879.1
OG0000781	g10956.t1, g14093.t1, g15091.t1, g395.t1	OQV14545.1, OQV16048.1, OQV25466.1, OQV25521.1	XP_055336140.1, XP_055341346.1	GAV02986.1, GAV02987.1
OG0000782	g11666.t1	OWA54139.1	XP_055332913.1, XP_055341016.1, XP_055341017.1, XP_055341018.1, XP_055341019.1, XP_055341020.1, XP_055341021.1	GAU91058.1, GAU91239.1, GAU91240.1
OG0000783	g11901.t1	OQV11593.1, OQV11594.1, OQV11600.1, OWA50376.1, OWA54270.1, OWA54272.1, OWA54717.1	XP_055353278.1, XP_055353279.1, XP_055353280.1	GAV06959.1
OG0000784		OQV11551.1, OQV11552.1, OQV11553.1, OQV14899.1, OQV14904.1, OQV16608.1, OWA53064.1, OWA53066.1, OWA53746.1, OWA53801.1, OWA55415.1, OWA55416.1
OG0000785		OQV12052.1, OQV12054.1, OQV16649.1, OQV16650.1, OQV16651.1, OQV22172.1, OQV22173.1, OWA54623.1, OWA54624.1, OWA54625.1, OWA54972.1, OWA54974.1
OG0000786		OQV13641.1, OQV22715.1, OQV26026.1, OWA50513.1, OWA50685.1, OWA52347.1, OWA52615.1, OWA52993.1, OWA53432.1, OWA53433.1, OWA55283.1, OWA55284.1
OG0000787		OQV13910.1, OQV13911.1, OQV13912.1, OQV16973.1, OQV16974.1, OQV20222.1	XP_055329528.1, XP_055346499.1	GAU88431.1, GAV02875.1, GAV02876.1, GAV02877.1
OG0000788		OQV15143.1, OQV15144.1, OQV23032.1, OWA52333.1, OWA52341.1, OWA52617.1, OWA53010.1, OWA53436.1, OWA54283.1, OWA54284.1, OWA55208.1, OWA55209.1
OG0000789		OQV15216.1, OQV15217.1, OQV15218.1	XP_055355421.1, XP_055355422.1	GAU87439.1, GAU87447.1, GAU87448.1, GAV09917.1, GAV09918.1, GAV09951.1, GAV09952.1
OG0000790		OQV16763.1, OQV25671.1, OWA50908.1, OWA50909.1, OWA50910.1, OWA50911.1, OWA50912.1, OWA54148.1, OWA54149.1, OWA54150.1, OWA54151.1, OWA54152.1
OG0000791		OQV18855.1, OQV18856.1, OQV18861.1, OQV19770.1, OQV19771.1, OQV19772.1, OQV19967.1, OQV19968.1, OQV19969.1, OQV19973.1, OQV19974.1, OWA50134.1
OG0000792		OQV19994.1, OQV19997.1, OQV20003.1, OQV25025.1, OQV25028.1, OQV25030.1, OWA52986.1, OWA52987.1		GAU91464.1, GAU94444.1, GAU94445.1, GAU94446.1
OG0000793		OQV24401.1, OQV24402.1, OQV24403.1, OWA52010.1, OWA52011.1, OWA52016.1, OWA52017.1, OWA52018.1, OWA52019.1, OWA54049.1, OWA54666.1, OWA54668.1
OG0000794		OQV25794.1		GAU89703.1, GAU89704.1, GAU89907.1, GAU97195.1, GAU99784.1, GAV07007.1, GAV07008.1, GAV07009.1, GAV07010.1, GAV07011.1, GAV07039.1
OG0000795			XP_055328754.1, XP_055328755.1, XP_055328756.1, XP_055328757.1, XP_055328758.1, XP_055329151.1, XP_055340471.1, XP_055340474.1, XP_055349663.1, XP_055351848.1, XP_055354353.1, XP_055356859.1
OG0000796			XP_055329745.1, XP_055329820.1, XP_055329831.1, XP_055329837.1, XP_055329838.1, XP_055329847.1, XP_055329848.1, XP_055329852.1, XP_055329901.1, XP_055330595.1, XP_055357220.1, XP_055357221.1
OG0000797			XP_055329854.1, XP_055330556.1, XP_055339036.1, XP_055339037.1, XP_055339038.1, XP_055339039.1, XP_055339040.1, XP_055339041.1, XP_055339042.1, XP_055339043.1, XP_055356385.1, XP_055356506.1
OG0000798			XP_055330735.1, XP_055330791.1, XP_055330811.1, XP_055331540.1, XP_055340974.1, XP_055345023.1, XP_055345025.1, XP_055345026.1, XP_055345027.1, XP_055345028.1, XP_055345029.1, XP_055345030.1
OG0000799			XP_055330891.1, XP_055336924.1, XP_055337059.1, XP_055337073.1, XP_055337074.1, XP_055337075.1, XP_055337076.1, XP_055337077.1, XP_055349074.1, XP_055356535.1, XP_055356541.1, XP_055357084.1
OG0000800			XP_055331205.1, XP_055335863.1, XP_055335877.1, XP_055335878.1, XP_055350646.1, XP_055350647.1, XP_055350648.1, XP_055353971.1, XP_055353972.1, XP_055357184.1, XP_055357186.1, XP_055357187.1
OG0000801			XP_055331857.1, XP_055338298.1, XP_055338299.1, XP_055338300.1, XP_055339745.1, XP_055339831.1, XP_055344799.1, XP_055347438.1, XP_055352825.1, XP_055352828.1, XP_055352829.1, XP_055354852.1
OG0000802			XP_055332712.1, XP_055336650.1, XP_055336651.1, XP_055338500.1, XP_055338502.1, XP_055344198.1, XP_055344199.1, XP_055344293.1, XP_055348715.1, XP_055348716.1, XP_055348724.1, XP_055348745.1
OG0000803			XP_055333228.1, XP_055333229.1, XP_055333230.1, XP_055333231.1, XP_055333232.1, XP_055333234.1, XP_055333235.1, XP_055333236.1, XP_055333237.1, XP_055333238.1, XP_055333239.1, XP_055333240.1
OG0000804			XP_055336036.1, XP_055336260.1, XP_055336261.1, XP_055336262.1, XP_055336263.1, XP_055336264.1, XP_055349143.1, XP_055351143.1, XP_055355451.1, XP_055355452.1, XP_055355454.1, XP_055355925.1
OG0000805			XP_055336567.1, XP_055336819.1, XP_055340338.1, XP_055340988.1, XP_055340989.1, XP_055342556.1, XP_055345377.1, XP_055351661.1, XP_055357554.1, XP_055357555.1, XP_055357556.1, XP_055357557.1
OG0000806			XP_055336863.1, XP_055336935.1, XP_055340482.1, XP_055341483.1, XP_055341484.1, XP_055341485.1, XP_055341487.1, XP_055341488.1, XP_055341489.1, XP_055341735.1, XP_055341737.1, XP_055354380.1
OG0000807			XP_055336995.1, XP_055336996.1, XP_055340352.1, XP_055341956.1, XP_055342019.1, XP_055345147.1, XP_055346844.1, XP_055348324.1, XP_055353308.1, XP_055355275.1, XP_055356318.1, XP_055356467.1
OG0000808			XP_055337939.1, XP_055351893.1, XP_055351894.1, XP_055351907.1, XP_055351908.1, XP_055351909.1, XP_055351910.1, XP_055357545.1, XP_055357546.1, XP_055357547.1, XP_055357548.1, XP_055357549.1
OG0000809			XP_055338410.1, XP_055340554.1, XP_055340555.1, XP_055340587.1, XP_055340689.1, XP_055340690.1, XP_055340691.1, XP_055340692.1, XP_055350405.1, XP_055352558.1, XP_055356179.1	GAV09613.1
OG0000810			XP_055338422.1, XP_055338423.1, XP_055338630.1, XP_055338631.1, XP_055338632.1, XP_055338633.1, XP_055338641.1, XP_055339077.1, XP_055339080.1, XP_055345498.1, XP_055353827.1, XP_055355619.1
OG0000811			XP_055343503.1, XP_055343504.1, XP_055343505.1, XP_055343507.1, XP_055343508.1, XP_055343509.1, XP_055343510.1, XP_055343511.1, XP_055343512.1, XP_055343513.1, XP_055343514.1, XP_055343515.1
OG0000812			XP_055355424.1, XP_055355425.1, XP_055355426.1, XP_055355427.1, XP_055355428.1, XP_055355430.1, XP_055355431.1, XP_055355432.1, XP_055355433.1, XP_055355434.1, XP_055355435.1, XP_055355436.1
OG0000813				GAU88518.1, GAU99219.1, GAU99537.1, GAU99538.1, GAV03071.1, GAV04164.1, GAV04284.1, GAV05496.1, GAV05497.1, GAV08755.1, GAV09585.1, GAV09763.1
OG0000814				GAU89091.1, GAU89313.1, GAU94403.1, GAU96432.1, GAU98750.1, GAU99839.1, GAV00418.1, GAV02459.1, GAV04390.1, GAV05366.1, GAV05584.1, GAV09173.1
OG0000815	g11118.t1, g11938.t1, g13234.t1, g15737.t1, g2316.t1, g2970.t1, g3182.t1, g929.t1, g9426.t1, g9506.t1			GAU91187.1
OG0000816	g11621.t1, g12225.t1, g12226.t1, g12227.t1, g12228.t1, g13563.t1, g13764.t1, g3353.t1, g5320.t1, g5483.t1, g6303.t1
OG0000817	g12689.t1, g12703.t1, g1465.t1, g15237.t1, g2307.t1, g2308.t1, g505.t1, g7459.t1	OQV15995.1, OWA55180.1, OWA55290.1
OG0000818	g8400.t1		XP_055342549.1, XP_055342550.1, XP_055344425.1, XP_055344426.1, XP_055344427.1, XP_055344428.1, XP_055347323.1, XP_055347324.1, XP_055347327.1, XP_055355223.1
OG0000819	g11135.t1, g12924.t1, g4981.t1, g5220.t1, g7856.t1	OQV19438.1, OWA54006.1		GAU89455.1, GAV01653.1, GAV01654.1, GAV06106.1
OG0000820			XP_055345351.1, XP_055345352.1, XP_055345393.1, XP_055345394.1, XP_055345417.1, XP_055347721.1, XP_055348586.1, XP_055349048.1, XP_055349111.1, XP_055349112.1, XP_055349155.1
OG0000821		OQV15142.1, OQV15145.1, OQV17724.1, OQV20399.1, OQV22853.1, OQV23437.1, OWA51671.1, OWA51676.1, OWA51677.1		GAU99547.1, GAV00023.1
OG0000822	g1393.t1, g15756.t1		XP_055334978.1, XP_055334988.1, XP_055344840.1, XP_055347889.1, XP_055348554.1, XP_055348569.1, XP_055356453.1, XP_055356456.1, XP_055356720.1
OG0000823	g10517.t1, g1360.t1, g4569.t1, g6943.t1, g7450.t1	OQV19465.1, OQV23394.1, OQV23395.1, OQV24135.1, OWA54009.1, OWA55102.1
OG0000824	g8714.t1	OQV14280.1, OQV19464.1, OQV19466.1, OQV19467.1, OWA55429.1, OWA55533.1		GAU87556.1, GAV01186.1, GAV05033.1, GAV09029.1
OG0000825	g11435.t1, g13338.t1, g3032.t1, g5158.t1		XP_055343880.1, XP_055343881.1, XP_055343882.1, XP_055343883.1, XP_055343884.1, XP_055343885.1, XP_055343886.1
OG0000826			XP_055340622.1, XP_055340710.1, XP_055344129.1, XP_055344759.1, XP_055346189.1, XP_055348535.1, XP_055349514.1, XP_055349939.1, XP_055351596.1, XP_055354784.1, XP_055355670.1
OG0000827	g4503.t1	OWA52946.1	XP_055338011.1, XP_055338020.1, XP_055338029.1, XP_055338036.1, XP_055338043.1, XP_055338051.1, XP_055338059.1, XP_055338068.1	GAU98111.1
OG0000828		OQV20669.1, OQV20670.1, OQV20930.1		GAU91092.1, GAU91442.1, GAU91443.1, GAU91707.1, GAU91708.1, GAU95314.1, GAU95315.1, GAU96030.1
OG0000829	g11514.t1, g13638.t1, g14326.t1, g14326.t2, g14330.t1, g191.t1	OQV17604.1, OQV19453.1, OWA50851.1, OWA50857.1		GAU97170.1
OG0000830	g8355.t1, g8355.t2	OQV11839.1, OQV22809.1, OQV24431.1, OQV24928.1, OQV25692.1	XP_055334232.1, XP_055334311.1, XP_055346501.1, XP_055353252.1
OG0000831	g4138.t1	OQV12524.1, OQV15616.1, OQV24912.1, OQV24913.1, OWA53817.1	XP_055330196.1, XP_055330215.1, XP_055351239.1	GAU90911.1, GAU94994.1
OG0000832	g10366.t1	OQV11508.1, OQV20455.1, OQV20458.1, OQV21943.1, OQV21945.1, OQV21948.1	XP_055345050.1, XP_055353230.1	GAU88790.1, GAU88791.1
OG0000833	g9284.t1	OWA55004.1, OWA55259.1, OWA55607.1	XP_055331677.1, XP_055331678.1	GAU91550.1, GAU91551.1, GAU91552.1, GAU91553.1, GAU91554.1
OG0000834	g11714.t1	OWA51824.1	XP_055344624.1, XP_055344625.1, XP_055344638.1, XP_055344639.1, XP_055344640.1, XP_055344641.1, XP_055344743.1, XP_055357004.1, XP_055357312.1
OG0000835	g1009.t1, g14476.t1, g14476.t2, g7993.t1	OQV24991.1	XP_055337682.1, XP_055337683.1, XP_055337684.1, XP_055337685.1	GAU91610.1, GAU92937.1
OG0000836	g10226.t1, g10231.t1, g10231.t2, g11384.t1, g633.t1, g633.t2	OQV22795.1, OQV22803.1, OWA50095.1		GAU92098.1, GAU92099.1
OG0000837	g10114.t1, g11589.t1, g13084.t1, g13084.t2, g14934.t1, g15429.t1, g15429.t2, g6482.t1, g6802.t1, g6802.t2	OWA54526.1
OG0000838	g15287.t1, g7270.t1	OQV17859.1, OQV17861.1	XP_055337653.1, XP_055353933.1, XP_055353935.1, XP_055355359.1, XP_055355360.1	GAV00698.1, GAV00699.1
OG0000839	g11491.t1, g16.t1, g168.t1	OQV12673.1, OQV13839.1, OQV20339.1	XP_055341552.1, XP_055348309.1	GAU95204.1, GAU95210.1, GAU95213.1
OG0000840	g4449.t1, g8616.t1	OWA50246.1, OWA54998.1	XP_055350767.1, XP_055356104.1, XP_055357849.1, XP_055357850.1	GAU95384.1, GAU95385.1, GAU95386.1
OG0000841	g4606.t1	OQV19702.1, OWA51360.1, OWA51362.1	XP_055346754.1, XP_055346776.1, XP_055350493.1, XP_055350534.1	GAU96212.1, GAU97860.1, GAV03208.1
OG0000842	g14925.t1, g15007.t1, g6231.t1, g6451.t1	OQV14703.1, OQV18639.1, OQV18640.1, OQV22080.1, OWA54633.1, OWA55437.1		GAV01144.1
OG0000843	g12962.t1	OQV25123.1, OQV25124.1	XP_055327689.1, XP_055336324.1, XP_055356769.1, XP_055356770.1, XP_055356771.1, XP_055356773.1	GAV04246.1, GAV04248.1
OG0000844	g12194.t1, g14051.t1, g14108.t1, g3682.t1, g800.t1	OQV11762.1, OQV11765.1	XP_055342128.1, XP_055342129.1	GAU93820.1, GAU93821.1
OG0000845	g4122.t1, g4123.t1, g4612.t1, g8520.t1	OQV19251.1	XP_055337884.1, XP_055337891.1, XP_055337899.1, XP_055337906.1, XP_055337914.1	GAV05183.1
OG0000846	g11411.t1	OWA53982.1	XP_055348328.1	GAU89883.1, GAU90525.1, GAU90864.1, GAU92503.1, GAV00921.1, GAV08556.1, GAV09213.1, GAV09662.1
OG0000847	g8741.t1	OQV19477.1, OQV20233.1, OQV20234.1, OQV20235.1	XP_055357709.1, XP_055357710.1	GAV00224.1, GAV02429.1, GAV02430.1, GAV02431.1
OG0000848	g7576.t1, g7577.t1	OQV11957.1, OQV13120.1, OQV25396.1	XP_055328106.1, XP_055328107.1, XP_055328109.1	GAV01963.1, GAV01964.1, GAV01965.1
OG0000849	g14569.t1	OQV14503.1, OQV14504.1	XP_055343754.1, XP_055343755.1, XP_055343910.1, XP_055343911.1, XP_055343912.1, XP_055343913.1	GAV04812.1, GAV04813.1
OG0000850	g14478.t1, g3702.t1	OWA53892.1	XP_055328355.1, XP_055328356.1, XP_055328357.1, XP_055328358.1, XP_055328363.1, XP_055328364.1	GAU95100.1, GAU95101.1
OG0000851	g1759.t1, g1949.t1, g3125.t1, g6244.t1, g6769.t1, g686.t1, g688.t1, g689.t1, g7414.t1, g8050.t1, g8056.t1
OG0000852	g3097.t1, g7477.t1, g7692.t1, g8106.t1, g8108.t1, g8109.t1, g928.t1	OQV20391.1	XP_055348315.1	GAU99348.1, GAU99349.1
OG0000853	g8826.t1	OQV20333.1, OQV20334.1	XP_055348262.1, XP_055348263.1, XP_055348264.1, XP_055348265.1, XP_055348267.1, XP_055348268.1, XP_055348269.1	GAV07164.1
OG0000854	g10376.t1, g10377.t1, g11985.t1, g4010.t1, g6021.t1, g6083.t1, g6306.t1, g6307.t1, g9281.t1	OQV23876.1	XP_055343003.1
OG0000855	g10297.t1, g10297.t2, g10961.t1, g11211.t1, g11821.t1, g1983.t1, g3949.t1, g469.t1, g5546.t1, g6229.t1, g6232.t1
OG0000856	g10105.t1, g10110.t1, g10111.t1, g10112.t1, g203.t1	OQV14164.1, OQV14165.1, OQV14166.1, OQV14167.1		GAU87866.1, GAU87867.1
OG0000857	g13326.t1, g13568.t1, g14277.t1, g15433.t1, g7422.t1	OQV18399.1, OQV24862.1	XP_055349126.1	GAV07071.1, GAV07072.1, GAV07073.1
OG0000858	g7091.t1, g7091.t2, g7093.t1, g7093.t2	OQV12225.1	XP_055335530.1, XP_055335531.1, XP_055335532.1, XP_055335534.1, XP_055335535.1	GAU97883.1
OG0000859	g7094.t1	OQV12226.1, OQV12227.1	XP_055335522.1, XP_055335523.1, XP_055335524.1, XP_055335525.1, XP_055335526.1, XP_055335527.1, XP_055335528.1	GAU97879.1
OG0000860	g7148.t1	OQV15681.1, OQV15682.1, OQV20152.1, OQV20153.1	XP_055339554.1, XP_055339563.1, XP_055339572.1, XP_055339580.1, XP_055339591.1	GAU97961.1
OG0000861	g9212.t1, g9212.t2	OQV24443.1, OQV25922.1	XP_055332584.1, XP_055332695.1, XP_055332696.1, XP_055336545.1	GAU91487.1, GAU92162.1, GAU94661.1
OG0000862	g12138.t1, g12138.t2	OQV22339.1, OQV22340.1, OQV22341.1	XP_055346745.1, XP_055346747.1, XP_055346748.1	GAV01695.1, GAV01696.1, GAV01697.1
OG0000863	g13174.t1	OQV25723.1, OQV25724.1, OQV25725.1, OQV25726.1	XP_055338667.1, XP_055338668.1, XP_055338670.1, XP_055338671.1	GAU88391.1, GAU88392.1
OG0000864	g13215.t1, g13215.t2	OQV17582.1	XP_055338933.1, XP_055338934.1, XP_055338935.1, XP_055338936.1, XP_055338937.1, XP_055338938.1, XP_055346637.1	GAU88645.1
OG0000865	g15834.t1	OQV12648.1, OWA54469.1	XP_055342623.1, XP_055342631.1, XP_055342638.1, XP_055342646.1, XP_055342653.1	GAU94668.1, GAU94669.1, GAU94670.1
OG0000866	g15871.t1	OQV19372.1, OQV19373.1	XP_055335713.1, XP_055335721.1, XP_055335727.1, XP_055335735.1, XP_055335743.1, XP_055335752.1, XP_055335759.1	GAU98015.1
OG0000867	g574.t1	OQV22497.1	XP_055335468.1, XP_055335469.1, XP_055335470.1, XP_055335471.1, XP_055335472.1, XP_055335473.1, XP_055335474.1	GAU97642.1, GAU97643.1
OG0000868	g604.t1	OQV15575.1, OQV17066.1	XP_055330887.1, XP_055330888.1, XP_055330889.1, XP_055330890.1, XP_055330952.1, XP_055330953.1, XP_055339005.1	GAU88331.1
OG0000869	g15484.t1, g2578.t1, g7707.t1	OQV11691.1	XP_055339025.1, XP_055339026.1, XP_055339027.1, XP_055339028.1, XP_055339117.1	GAU89753.1, GAV09392.1
OG0000870	g2933.t1, g2933.t2	OQV22151.1, OQV22152.1, OQV22153.1	XP_055328021.1, XP_055328022.1, XP_055328023.1, XP_055328024.1, XP_055328025.1	GAV05641.1
OG0000871	g5629.t1, g5629.t2, g5629.t3	OQV21326.1, OQV21327.1, OQV21328.1	XP_055334859.1, XP_055334860.1, XP_055334861.1	GAU87366.1, GAU87367.1
OG0000872	g13709.t1, g13772.t1, g7739.t1, g7739.t2	OQV17596.1, OQV17597.1	XP_055340785.1, XP_055340786.1, XP_055340787.1, XP_055340788.1	GAV02958.1
OG0000873	g8125.t1	OQV18743.1	XP_055331918.1, XP_055331919.1, XP_055331920.1, XP_055331921.1, XP_055331922.1, XP_055331923.1, XP_055331925.1, XP_055331926.1	GAV00465.1
OG0000874	g8935.t1	OQV13865.1, OQV13866.1, OQV13867.1	XP_055347541.1, XP_055347542.1, XP_055347543.1, XP_055347544.1, XP_055347545.1, XP_055347546.1	GAV01712.1
OG0000875	g10184.t1	OQV13883.1	XP_055346716.1, XP_055346717.1, XP_055346718.1, XP_055346719.1, XP_055346720.1, XP_055346721.1, XP_055346722.1, XP_055346739.1	GAU95685.1
OG0000876	g10219.t1, g10219.t2	OQV22432.1, OQV22433.1	XP_055335587.1, XP_055335588.1, XP_055335589.1, XP_055335590.1, XP_055335591.1	GAU97584.1, GAU97585.1
OG0000877	g10718.t1, g4793.t1, g4797.t1	OQV21284.1	XP_055331348.1, XP_055331349.1, XP_055331350.1, XP_055331351.1, XP_055331352.1, XP_055331353.1, XP_055331354.1
OG0000878	g11346.t1	OWA50230.1, OWA53572.1	XP_055331509.1, XP_055333720.1, XP_055333721.1	GAU87622.1, GAV01203.1, GAV01204.1, GAV01205.1, GAV01206.1
OG0000879	g12246.t1, g5671.t1, g8665.t1	OQV14642.1, OQV14643.1, OQV17227.1, OWA55584.1	XP_055329102.1, XP_055353600.1	GAV02321.1, GAV06714.1
OG0000880	g12261.t1	OWA53056.1, OWA53057.1, OWA53058.1, OWA53059.1, OWA53060.1	XP_055346708.1	GAV03224.1, GAV03225.1, GAV03226.1, GAV03227.1
OG0000881	g12264.t1, g12264.t2	OQV16826.1, OQV16827.1, OQV16829.1	XP_055337212.1, XP_055337213.1, XP_055337214.1	GAV02136.1, GAV02137.1, GAV02139.1
OG0000882	g12453.t1	OQV22508.1, OQV22510.1, OQV22511.1, OQV22512.1, OQV22513.1, OQV22514.1	XP_055335629.1, XP_055335630.1, XP_055335631.1	GAU97664.1
OG0000883	g12972.t1, g12972.t2, g12972.t3	OQV25166.1	XP_055348769.1, XP_055348770.1, XP_055348771.1, XP_055348772.1, XP_055348773.1, XP_055357516.1	GAV04212.1
OG0000884	g13912.t1	OQV14381.1, OQV14382.1, OQV14383.1	XP_055351085.1, XP_055351086.1, XP_055351088.1, XP_055351089.1, XP_055351090.1, XP_055351091.1	GAU95677.1
OG0000885	g10658.t1, g10659.t1, g1224.t1, g13868.t1, g14022.t1, g2353.t1, g394.t1, g5273.t1	OQV24583.1	XP_055354887.1	GAU94097.1
OG0000886	g14670.t1	OWA49787.1, OWA49788.1	XP_055333667.1, XP_055333668.1, XP_055333669.1, XP_055333670.1, XP_055333671.1	GAU98552.1, GAU98556.1, GAU98557.1
OG0000887	g14956.t1	OQV24536.1	XP_055332824.1, XP_055342590.1, XP_055342591.1, XP_055342592.1, XP_055342593.1, XP_055342609.1, XP_055342610.1, XP_055342611.1	GAU94142.1
OG0000888	g14974.t1	OQV21033.1, OQV23082.1, OQV25495.1, OQV25496.1, OWA51963.1	XP_055332783.1, XP_055332784.1	GAU91341.1, GAU91342.1, GAU91343.1
OG0000889	g153.t1	OQV17369.1, OQV17370.1, OQV17371.1, OQV18110.1, OWA49837.1, OWA49838.1, OWA49839.1, OWA49840.1	XP_055331120.1	GAU98342.1
OG0000890	g249.t1, g249.t2	OQV14144.1	XP_055334832.1, XP_055334833.1, XP_055334834.1, XP_055334835.1	GAU87928.1, GAU87929.1, GAU87930.1, GAU87931.1
OG0000891	g657.t1, g657.t2	OQV15117.1, OQV15118.1, OQV15119.1	XP_055333168.1, XP_055333177.1, XP_055333186.1, XP_055333197.1, XP_055333206.1	GAU98506.1
OG0000892	g1027.t1	OQV24540.1, OQV24542.1, OQV24545.1, OQV24940.1	XP_055339451.1, XP_055339452.1, XP_055339453.1, XP_055339454.1, XP_055339455.1	GAV04378.1
OG0000893	g1080.t1, g1080.t2, g1080.t3, g1080.t4, g1080.t5		XP_055348279.1, XP_055348288.1, XP_055348298.1, XP_055348305.1, XP_055349640.1	GAU90360.1
OG0000894	g2047.t1	OQV17943.1, OWA54267.1	XP_055338759.1, XP_055338760.1, XP_055338761.1, XP_055338762.1, XP_055338763.1, XP_055338764.1, XP_055338765.1	GAU90890.1
OG0000895	g2749.t1	OQV25881.1, OQV25882.1, OQV25883.1, OQV25884.1	XP_055332578.1, XP_055332579.1, XP_055332580.1, XP_055332581.1, XP_055332582.1	GAU94334.1
OG0000896	g11153.t1, g2425.t1, g6158.t1	OQV12058.1, OQV12059.1, OQV25642.1	XP_055333842.1, XP_055345511.1, XP_055351926.1	GAU89109.1, GAU91846.1
OG0000897	g7840.t1	OQV18202.1	XP_055327844.1, XP_055327845.1, XP_055327846.1, XP_055327847.1, XP_055327848.1, XP_055327849.1, XP_055327850.1	GAV03635.1, GAV03636.1
OG0000898	g8442.t1	OQV19448.1	XP_055343377.1, XP_055343378.1, XP_055343379.1, XP_055343380.1	GAV08042.1, GAV08043.1, GAV08044.1, GAV08045.1, GAV08046.1
OG0000899	g11683.t1	OQV18298.1, OQV18299.1, OQV18300.1, OQV18301.1	XP_055332055.1, XP_055332056.1, XP_055332057.1	GAU97481.1, GAU97482.1, GAU97483.1
OG0000900	g58.t1	OWA50843.1, OWA50844.1, OWA50846.1, OWA51289.1, OWA54794.1	XP_055346061.1, XP_055348115.1, XP_055354010.1, XP_055354011.1	GAV08127.1
OG0000901	g10115.t1, g13059.t1, g1386.t1, g1389.t1, g1932.t1, g893.t1	OQV20353.1, OQV24878.1	XP_055343850.1, XP_055343852.1	GAU91254.1
OG0000902	g15032.t1, g4881.t1	OWA51001.1	XP_055343191.1, XP_055343192.1, XP_055343193.1, XP_055343194.1, XP_055343195.1, XP_055343196.1, XP_055343197.1	GAV07996.1
OG0000903	g15061.t1	OWA53783.1, OWA53784.1, OWA54066.1, OWA54067.1, OWA54071.1, OWA54073.1, OWA54924.1, OWA54927.1	XP_055343237.1	GAU97236.1
OG0000904	g1148.t1	OQV13819.1, OQV13820.1	XP_055335365.1, XP_055335366.1, XP_055335367.1, XP_055335368.1, XP_055335369.1, XP_055335370.1, XP_055335371.1, XP_055335372.1
OG0000905	g1160.t1, g13057.t1, g13058.t1, g1931.t1	OQV15611.1, OQV21404.1	XP_055344876.1, XP_055354295.1, XP_055354296.1, XP_055354297.1	GAV00128.1
OG0000906	g3640.t1	OQV25315.1	XP_055327540.1, XP_055327542.1, XP_055327543.1, XP_055327544.1, XP_055327545.1, XP_055327546.1, XP_055327547.1, XP_055327548.1	GAV03946.1
OG0000907	g6363.t1	OQV23463.1, OWA50272.1	XP_055328323.1, XP_055349846.1, XP_055355825.1, XP_055355826.1	GAU90219.1, GAU92800.1, GAV05963.1, GAV05964.1
OG0000908	g5492.t1, g6373.t1	OQV21123.1, OQV21146.1, OWA55627.1, OWA55628.1	XP_055337442.1, XP_055337443.1, XP_055337670.1	GAU92835.1, GAV05185.1
OG0000909	g6399.t1	OQV11879.1	XP_055342532.1, XP_055342533.1, XP_055342534.1, XP_055342535.1, XP_055342536.1, XP_055342537.1, XP_055342538.1	GAU96442.1, GAU96443.1
OG0000910	g6853.t1	OQV21007.1, OQV21008.1	XP_055332933.1, XP_055332934.1, XP_055332935.1, XP_055332936.1, XP_055332937.1, XP_055332938.1	GAU91283.1, GAU91284.1
OG0000911	g8722.t1, g8722.t2	OQV21198.1	XP_055339548.1, XP_055339549.1, XP_055339550.1, XP_055339551.1, XP_055339552.1, XP_055339553.1, XP_055339555.1	GAV05826.1
OG0000912	g9546.t1, g9546.t2	OWA53511.1, OWA53512.1	XP_055334808.1, XP_055334809.1, XP_055334810.1, XP_055334811.1	GAU87902.1, GAU87904.1, GAU87905.1
OG0000913	g9578.t1, g9578.t2, g9578.t3	OWA50335.1, OWA50337.1, OWA50338.1	XP_055334426.1, XP_055334428.1, XP_055334429.1	GAU98931.1, GAV00893.1
OG0000914	g10465.t1, g1407.t1, g15657.t1	OQV14597.1, OWA55414.1, OWA55708.1	XP_055329596.1, XP_055329677.1	GAV00067.1, GAV00068.1, GAV00069.1
OG0000915	g12784.t1, g4637.t1	OQV17101.1	XP_055346121.1	GAU93759.1, GAU93760.1, GAU93761.1, GAU93762.1, GAV06737.1, GAV06738.1, GAV06739.1
OG0000916	g13810.t1	OQV19408.1, OQV19409.1	XP_055352416.1, XP_055352417.1, XP_055352418.1, XP_055352419.1, XP_055352420.1, XP_055352421.1, XP_055352422.1	GAU97970.1
OG0000917	g14110.t1	OQV11756.1, OQV11757.1	XP_055342170.1	GAU93822.1, GAU93823.1, GAU93824.1, GAU93825.1, GAU93826.1, GAU93827.1, GAU93828.1
OG0000918	g429.t1, g429.t2	OQV12803.1	XP_055347245.1, XP_055347246.1, XP_055347247.1, XP_055347248.1, XP_055347249.1, XP_055354580.1, XP_055354581.1	GAV02649.1
OG0000919	g1390.t1, g5886.t1, g892.t1, g895.t1	OQV20352.1, OQV24879.1, OQV24880.1	XP_055343849.1	GAU91256.1, GAU91257.1, GAU91258.1
OG0000920	g1625.t1	OQV14305.1, OWA55031.1	XP_055345102.1, XP_055345103.1, XP_055345104.1, XP_055345106.1, XP_055346573.1	GAU94609.1, GAU94610.1, GAU94611.1
OG0000921	g2420.t1	OQV21029.1, OQV23995.1	XP_055346019.1, XP_055346020.1, XP_055353808.1, XP_055353810.1	GAU90368.1, GAU90369.1, GAU91329.1, GAU91330.1
OG0000922	g3137.t1	OQV18002.1	XP_055349158.1, XP_055349164.1, XP_055349172.1, XP_055349178.1, XP_055349184.1, XP_055349192.1, XP_055349200.1	GAU90835.1, GAU90836.1
OG0000923	g3771.t1	OQV12191.1	XP_055344552.1, XP_055344559.1, XP_055344567.1, XP_055344575.1, XP_055344582.1, XP_055344589.1, XP_055344597.1, XP_055344605.1	GAU93012.1
OG0000924	g4143.t1	OQV18815.1, OWA52026.1, OWA53934.1	XP_055331061.1, XP_055357739.1, XP_055357740.1, XP_055357741.1	GAU96542.1, GAV00144.1, GAV00145.1
OG0000925	g5253.t1	OQV19419.1	XP_055354064.1, XP_055354065.1, XP_055354067.1, XP_055354068.1, XP_055354069.1, XP_055354070.1, XP_055354071.1, XP_055354072.1	GAV07133.1
OG0000926	g7240.t1, g7240.t2	OQV15346.1, OWA55647.1	XP_055343308.1, XP_055343309.1, XP_055343312.1	GAV01040.1, GAV01041.1, GAV01042.1, GAV01043.1
OG0000927	g8668.t1	OQV20563.1, OWA52063.1, OWA52064.1, OWA52065.1, OWA53596.1, OWA54109.1, OWA54110.1, OWA55099.1, OWA55299.1		GAV04561.1
OG0000928	g10070.t1	OQV15724.1	XP_055341314.1, XP_055341315.1, XP_055341324.1, XP_055341325.1, XP_055341326.1, XP_055341327.1, XP_055341328.1, XP_055341433.1	GAV02124.1
OG0000929	g11792.t1	OQV13458.1	XP_055331231.1, XP_055334822.1, XP_055334823.1, XP_055348594.1	GAU87320.1, GAU87321.1, GAU88090.1, GAU88091.1, GAU88092.1
OG0000930	g13296.t1, g15512.t1	OQV12925.1, OQV15762.1, OQV15763.1, OQV23114.1, OWA50010.1, OWA50011.1, OWA50012.1, OWA50013.1, OWA52406.1
OG0000931	g13852.t1	OQV23935.1	XP_055342955.1, XP_055342956.1, XP_055342957.1, XP_055342958.1, XP_055342959.1, XP_055342960.1, XP_055342961.1, XP_055342962.1	GAU93298.1
OG0000932	g14258.t1	OWA51538.1, OWA51653.1, OWA53828.1	XP_055331389.1, XP_055356210.1, XP_055356211.1	GAU87592.1, GAV03696.1, GAV03697.1, GAV03698.1
OG0000933		OQV11571.1, OQV17287.1, OQV24635.1, OQV24636.1, OWA53076.1, OWA54384.1, OWA54385.1, OWA54386.1, OWA54387.1, OWA54388.1, OWA54513.1
OG0000934		OQV13408.1, OQV13410.1, OQV22656.1, OQV26106.1, OWA51076.1, OWA51086.1, OWA54351.1	XP_055349390.1, XP_055349391.1	GAU96562.1, GAV04954.1
OG0000935		OQV19648.1, OWA51662.1	XP_055340402.1, XP_055340414.1, XP_055340427.1, XP_055340429.1, XP_055343158.1, XP_055357026.1, XP_055357027.1, XP_055357028.1	GAV08934.1
OG0000936		OQV26005.1	XP_055339532.1, XP_055339533.1, XP_055339534.1, XP_055339535.1, XP_055339536.1, XP_055339537.1, XP_055339538.1, XP_055339540.1, XP_055339541.1	GAU92170.1
OG0000937		OWA50455.1, OWA50456.1, OWA50460.1, OWA50462.1, OWA50463.1, OWA50467.1, OWA50471.1, OWA50472.1, OWA50861.1, OWA54442.1, OWA54448.1
OG0000938			XP_055328202.1, XP_055329267.1, XP_055329289.1	GAV00980.1, GAV04454.1, GAV06692.1, GAV06693.1, GAV06790.1, GAV06791.1, GAV07043.1, GAV09839.1
OG0000939			XP_055329168.1, XP_055329803.1, XP_055329804.1, XP_055329926.1, XP_055329974.1, XP_055350315.1, XP_055350354.1, XP_055350356.1, XP_055357502.1, XP_055357504.1, XP_055357505.1
OG0000940			XP_055329742.1, XP_055348703.1, XP_055352947.1, XP_055353823.1, XP_055354136.1, XP_055354362.1, XP_055355686.1, XP_055356862.1, XP_055356866.1, XP_055356867.1, XP_055357310.1
OG0000941			XP_055329861.1, XP_055330256.1, XP_055344383.1, XP_055344384.1, XP_055344385.1, XP_055344386.1, XP_055344397.1, XP_055344398.1, XP_055344435.1, XP_055344436.1, XP_055344452.1
OG0000942			XP_055330428.1, XP_055330429.1, XP_055347907.1, XP_055347908.1, XP_055349783.1, XP_055349957.1, XP_055350792.1, XP_055350798.1, XP_055353192.1, XP_055355146.1, XP_055355147.1
OG0000943			XP_055330441.1, XP_055330442.1, XP_055332308.1, XP_055333845.1, XP_055333846.1, XP_055348746.1, XP_055348852.1, XP_055348853.1, XP_055348877.1, XP_055352989.1, XP_055355280.1
OG0000944			XP_055331246.1, XP_055347182.1, XP_055347331.1, XP_055354403.1, XP_055354422.1, XP_055354423.1, XP_055354424.1, XP_055354425.1, XP_055354427.1, XP_055354429.1, XP_055354430.1
OG0000945			XP_055336418.1, XP_055336419.1, XP_055336420.1, XP_055336421.1, XP_055336422.1, XP_055336423.1, XP_055336424.1, XP_055336425.1, XP_055336426.1, XP_055336427.1, XP_055336428.1
OG0000946			XP_055336774.1, XP_055336780.1, XP_055340506.1, XP_055346577.1, XP_055346818.1, XP_055355327.1, XP_055355330.1, XP_055355492.1, XP_055355493.1, XP_055355494.1, XP_055357568.1
OG0000947			XP_055337957.1, XP_055352392.1, XP_055352393.1, XP_055352394.1, XP_055352395.1, XP_055352396.1, XP_055352424.1, XP_055352425.1, XP_055352426.1, XP_055352427.1, XP_055352447.1
OG0000948			XP_055339071.1, XP_055339074.1, XP_055352458.1, XP_055352459.1, XP_055352460.1, XP_055352461.1, XP_055352462.1, XP_055352463.1, XP_055352464.1, XP_055352465.1, XP_055352489.1
OG0000949			XP_055340314.1, XP_055351060.1, XP_055351061.1, XP_055351062.1, XP_055351063.1, XP_055351064.1, XP_055351065.1, XP_055351092.1, XP_055354958.1, XP_055354959.1, XP_055355437.1
OG0000950			XP_055340911.1, XP_055353060.1, XP_055353061.1, XP_055355285.1, XP_055355302.1, XP_055355303.1, XP_055355305.1, XP_055355307.1, XP_055356678.1, XP_055356679.1, XP_055357315.1
OG0000951			XP_055345350.1, XP_055345355.1, XP_055345356.1, XP_055345358.1, XP_055345359.1, XP_055345360.1, XP_055345361.1, XP_055345362.1, XP_055345363.1, XP_055345365.1, XP_055345366.1
OG0000952			XP_055346553.1, XP_055346554.1, XP_055346555.1, XP_055346569.1, XP_055346570.1, XP_055346571.1, XP_055346572.1, XP_055348018.1, XP_055348019.1, XP_055348037.1, XP_055348038.1
OG0000953			XP_055348050.1, XP_055348067.1, XP_055348068.1, XP_055348069.1, XP_055348074.1, XP_055348076.1, XP_055348089.1, XP_055348125.1, XP_055348135.1, XP_055348136.1, XP_055348140.1
OG0000954			XP_055348240.1, XP_055350950.1, XP_055350951.1, XP_055350953.1, XP_055350954.1, XP_055355018.1, XP_055355021.1, XP_055355033.1, XP_055355034.1, XP_055355036.1, XP_055355037.1
OG0000955			XP_055352576.1, XP_055352603.1, XP_055352604.1, XP_055352607.1, XP_055352608.1, XP_055352609.1, XP_055352610.1, XP_055352612.1, XP_055352613.1, XP_055357073.1, XP_055357074.1
OG0000956				GAU87224.1, GAU89300.1, GAU89301.1, GAU89847.1, GAU89848.1, GAU89849.1, GAU94544.1, GAU99904.1, GAV09665.1, GAV09666.1, GAV09667.1
OG0000957				GAU87557.1, GAU88915.1, GAU89525.1, GAU97027.1, GAV00386.1, GAV00387.1, GAV00388.1, GAV00389.1, GAV00614.1, GAV00617.1, GAV09228.1
OG0000958				GAU88598.1, GAU89651.1, GAU92499.1, GAV01384.1, GAV02617.1, GAV03802.1, GAV07962.1, GAV08528.1, GAV08978.1, GAV08979.1, GAV09244.1
OG0000959				GAU91259.1, GAU94810.1, GAU97048.1, GAU97121.1, GAU97122.1, GAU97123.1, GAU97133.1, GAV01023.1, GAV06256.1, GAV06358.1, GAV07005.1
OG0000960		OQV21221.1, OWA51742.1, OWA51743.1, OWA53686.1	XP_055339559.1, XP_055339560.1	GAV05718.1, GAV05719.1, GAV05720.1, GAV05721.1
OG0000961	g14267.t1, g1593.t1, g7884.t1, g8606.t1	OQV11561.1, OQV13205.1, OWA55186.1, OWA55255.1, OWA55256.1, OWA55257.1
OG0000962	g14349.t1	OQV12680.1, OQV15450.1, OQV24070.1, OQV24073.1, OWA51754.1		GAU90390.1, GAU90456.1, GAU93517.1, GAV04657.1
OG0000963	g5390.t1	OQV13081.1, OQV17756.1, OQV24149.1, OWA54435.1	XP_055330393.1	GAU92343.1, GAU94589.1, GAV08348.1, GAV09526.1
OG0000964	g1010.t1, g11296.t1, g4305.t1, g6800.t1		XP_055329579.1, XP_055345329.1, XP_055345330.1, XP_055345331.1, XP_055352285.1, XP_055354787.1
OG0000965	g1068.t1, g11072.t1, g11995.t1, g11996.t1, g4088.t1, g5662.t1, g6246.t1	OQV14364.1, OWA54885.1	XP_055349073.1
OG0000966	g10236.t1, g5055.t1, g8107.t1	OQV16040.1, OQV16635.1, OQV17761.1, OQV19675.1, OWA54621.1		GAU94805.1, GAV09018.1
OG0000967	g12798.t1, g13320.t1, g1416.t1, g15529.t1, g15740.t1, g5433.t1, g5712.t1, g7713.t1, g9813.t1	OQV12915.1
OG0000968	g10509.t1, g15523.t1, g2522.t1, g2523.t1, g2524.t1, g3600.t1, g7412.t1, g8374.t1	OWA53619.1, OWA55072.1
OG0000969	g14579.t1, g15301.t1, g3101.t1, g8837.t1	OQV18576.1, OQV18578.1, OQV22766.1, OQV22767.1, OQV24182.1, OWA52131.1
OG0000970	g327.t1	OQV16832.1, OQV16834.1, OQV24863.1	XP_055337289.1, XP_055352537.1, XP_055352540.1	GAV02147.1, GAV06316.1, GAV07070.1
OG0000971	g71.t1	OQV14678.1, OQV23495.1	XP_055328687.1, XP_055342010.1, XP_055345820.1, XP_055350035.1, XP_055350594.1, XP_055350603.1	GAV04935.1
OG0000972	g14294.t1, g14295.t1, g2820.t1, g3913.t1, g5701.t1, g7872.t1, g7879.t1, g887.t1	OQV23545.1		GAV05083.1
OG0000973	g3185.t1, g52.t1, g54.t1, g55.t1, g9448.t1	OQV23566.1, OQV23567.1	XP_055348052.1, XP_055348113.1, XP_055348116.1
OG0000974	g1011.t1, g3587.t1, g4310.t1, g4319.t1, g4324.t1, g4325.t1, g8847.t1, g8860.t1	OQV13600.1	XP_055357777.1
OG0000975	g10228.t1, g10691.t1, g13961.t1	OQV12048.1, OQV14797.1, OQV17366.1	XP_055338451.1, XP_055339030.1, XP_055349259.1	GAV07131.1
OG0000976	g10133.t1, g2884.t1, g3057.t1, g514.t1	OWA50646.1	XP_055345964.1	GAU89774.1, GAV01188.1, GAV02618.1, GAV07534.1
OG0000977	g11293.t1, g14418.t1, g2078.t1	OQV18805.1	XP_055345175.1, XP_055348641.1	GAU88085.1, GAV00453.1, GAV06490.1, GAV06982.1
OG0000978	g13532.t1, g1627.t1, g1628.t1, g1630.t1, g5147.t1, g5721.t1, g6631.t1, g6632.t1		XP_055332794.1, XP_055332795.1
OG0000979	g11173.t1	OQV14063.1, OQV14088.1, OWA54373.1	XP_055332805.1, XP_055332806.1, XP_055339914.1, XP_055339915.1, XP_055339917.1	GAV00131.1
OG0000980	g10780.t1	OWA51100.1, OWA51104.1, OWA55626.1	XP_055351581.1, XP_055351590.1, XP_055351597.1, XP_055351604.1, XP_055351609.1	GAU94915.1
OG0000981	g15195.t1	OQV15399.1	XP_055351031.1, XP_055351048.1, XP_055351049.1, XP_055351050.1, XP_055351051.1, XP_055351052.1, XP_055351053.1	GAV08256.1
OG0000982	g13341.t1, g5018.t1, g847.t1	OQV24891.1, OWA51228.1, OWA51229.1, OWA51232.1	XP_055353885.1, XP_055356153.1	GAU94965.1
OG0000983	g15537.t1, g6132.t1, g6133.t1	OQV13564.1, OWA54969.1	XP_055329040.1, XP_055337150.1, XP_055337151.1, XP_055355631.1, XP_055356384.1
OG0000984	g14421.t1, g1806.t1, g485.t1	OQV16097.1, OQV16100.1	XP_055338415.1, XP_055338582.1, XP_055338605.1, XP_055347003.1, XP_055347004.1
OG0000985	g8142.t1, g8142.t2	OQV24704.1	XP_055332199.1, XP_055332200.1, XP_055332201.1, XP_055332202.1, XP_055332217.1	GAV07419.1, GAV07420.1
OG0000986	g2108.t1, g2108.t2	OQV23539.1, OQV23540.1, OQV23541.1, OWA50917.1, OWA50919.1	XP_055356055.1	GAV04490.1, GAV04513.1
OG0000987	g10335.t1, g10335.t2	OQV23852.1, OQV26131.1	XP_055332597.1, XP_055332598.1, XP_055332599.1, XP_055342846.1	GAU94574.1, GAU94575.1
OG0000988	g14984.t1, g14984.t2	OQV14284.1, OQV17891.1, OQV17892.1	XP_055331002.1, XP_055331003.1, XP_055339685.1	GAV00367.1, GAV00368.1
OG0000989	g6504.t1, g7409.t1	OQV25573.1, OQV25575.1	XP_055333865.1, XP_055333866.1	GAU91423.1, GAU91424.1, GAU91425.1, GAU91426.1
OG0000990	g6555.t1, g6555.t2, g8220.t1, g8221.t1	OQV25389.1, OWA51439.1	XP_055327715.1, XP_055343938.1	GAU94773.1, GAU94781.1
OG0000991	g8072.t1	OQV15161.1, OQV15986.1, OQV15987.1, OQV16005.1, OWA52499.1, OWA52502.1	XP_055337216.1, XP_055337217.1	GAU99528.1
OG0000992	g1622.t1, g1622.t2	OQV25415.1, OQV25416.1, OQV25417.1	XP_055346602.1, XP_055346732.1, XP_055346797.1	GAV02021.1, GAV02023.1
OG0000993	g12496.t1	OQV22183.1, OQV22189.1	XP_055328098.1, XP_055328099.1, XP_055328100.1, XP_055328101.1, XP_055328102.1, XP_055328103.1, XP_055328104.1
OG0000994	g12383.t1, g13000.t1, g15451.t1, g7392.t1	OQV14825.1, OQV17908.1	XP_055331086.1, XP_055331171.1, XP_055331587.1	GAU88540.1
OG0000995	g10148.t1, g1055.t1	OQV13279.1, OQV14604.1	XP_055337760.1, XP_055351802.1, XP_055351803.1, XP_055351804.1	GAV04200.1, GAV06766.1
OG0000996	g1.t1	OQV14930.1, OQV14931.1	XP_055332524.1, XP_055332525.1, XP_055349012.1	GAU88805.1, GAU93985.1, GAU95196.1, GAU95197.1
OG0000997	g1229.t1, g1229.t2, g1276.t1, g1276.t2, g15299.t1, g15572.t1, g2020.t1, g2020.t2, g2543.t1, g7932.t1
OG0000998	g11116.t1, g12269.t1, g1408.t1, g15356.t1, g15357.t1, g1768.t1, g1769.t1, g4689.t1, g5915.t1, g7421.t1
OG0000999	g11502.t1, g11504.t1, g14438.t1, g14807.t1, g2723.t1, g2725.t1, g4576.t1, g4783.t1, g8028.t1, g8044.t1
OG0001000	g5727.t1	OQV15085.1	XP_055331896.1, XP_055331905.1, XP_055331914.1, XP_055331924.1, XP_055331930.1, XP_055331940.1	GAU98405.1, GAU98406.1
OG0001001	g10638.t1, g12294.t1, g12597.t1, g15358.t1, g15365.t1, g1684.t1, g1945.t1, g9497.t1		XP_055335736.1, XP_055355404.1
OG0001002	g166.t1, g2752.t1, g3709.t1, g3781.t1	OQV25873.1	XP_055332568.1, XP_055332569.1, XP_055332570.1, XP_055334006.1	GAU94347.1
OG0001003	g11060.t1, g11066.t1, g1207.t1, g6939.t1	OQV12150.1	XP_055350689.1, XP_055350722.1	GAV01342.1, GAV01343.1, GAV01344.1
OG0001004	g13869.t1, g3542.t1	OQV13264.1	XP_055346623.1	GAU94665.1, GAV03928.1, GAV03929.1, GAV05597.1, GAV05598.1, GAV05599.1
OG0001005	g11546.t1, g11548.t1, g11550.t1, g12657.t1, g14283.t1, g1895.t1, g1896.t1	OQV17963.1, OQV17987.1, OQV20457.1
OG0001006	g204.t1, g204.t2, g2317.t1, g3436.t1	OQV18473.1	XP_055354318.1, XP_055354319.1, XP_055354320.1, XP_055354321.1	GAV07588.1
OG0001007	g11507.t1, g1237.t1, g3748.t1, g5312.t1, g9965.t1	OQV18068.1, OQV22132.1, OWA55687.1		GAU91074.1, GAU98296.1
OG0001008	g13620.t1, g13620.t2	OQV13931.1, OQV15914.1	XP_055331397.1, XP_055331398.1, XP_055331399.1, XP_055336196.1	GAV03105.1, GAV09282.1
OG0001009	g1327.t1, g4398.t1, g5417.t1	OQV21587.1, OQV21589.1	XP_055339017.1, XP_055339018.1, XP_055339019.1	GAU88255.1, GAU88257.1
OG0001010	g1595.t1, g2065.t1, g2882.t1, g2984.t1, g2985.t1, g4929.t1, g4930.t1, g5284.t1, g5285.t1, g5941.t1
OG0001011	g11143.t1, g13121.t1, g15266.t1, g6300.t1, g6544.t1, g8838.t1, g8838.t2		XP_055332554.1, XP_055340836.1, XP_055340837.1
OG0001012	g14049.t1, g9202.t1	OQV20682.1, OQV24448.1	XP_055332856.1, XP_055332946.1, XP_055357942.1, XP_055357943.1	GAU93997.1, GAV04794.1
OG0001013	g4440.t1	OWA52701.1	XP_055352229.1, XP_055352230.1, XP_055352231.1, XP_055352232.1, XP_055352233.1, XP_055352234.1	GAU96042.1, GAU96043.1
OG0001014	g4458.t1, g5073.t1	OQV25206.1	XP_055328046.1, XP_055328047.1, XP_055328048.1, XP_055328049.1, XP_055328050.1, XP_055328051.1	GAV04120.1
OG0001015	g4487.t1, g4487.t2	OQV25324.1, OQV25325.1	XP_055328434.1, XP_055328435.1, XP_055328436.1, XP_055328437.1	GAV03933.1, GAV03934.1
OG0001016	g4493.t1	OQV18662.1, OQV18676.1	XP_055336030.1, XP_055336031.1, XP_055336032.1, XP_055352663.1, XP_055352664.1	GAU99036.1, GAU99037.1
OG0001017	g7095.t1	OQV12219.1, OQV12220.1	XP_055335615.1, XP_055335616.1, XP_055335617.1, XP_055335618.1, XP_055335619.1, XP_055335620.1	GAU97888.1
OG0001018	g7121.t1	OQV20114.1	XP_055335415.1, XP_055335416.1, XP_055335417.1, XP_055335418.1, XP_055335419.1, XP_055335420.1, XP_055335421.1	GAU97918.1
OG0001019	g7162.t1	OQV19395.1	XP_055339209.1, XP_055339216.1, XP_055339225.1, XP_055339233.1, XP_055339241.1, XP_055339246.1, XP_055339253.1, XP_055339263.1
OG0001020	g237.t1, g5963.t1, g9048.t1, g9147.t1, g9691.t1	OQV14979.1, OQV14980.1	XP_055342132.1, XP_055342133.1	GAU93875.1
OG0001021	g12103.t1, g3012.t1	OQV24285.1	XP_055341052.1, XP_055341053.1	GAU93433.1, GAU93434.1, GAU93435.1, GAU93436.1, GAV00215.1
OG0001022	g12181.t1	OQV23964.1	XP_055342716.1, XP_055342717.1, XP_055342718.1, XP_055342719.1, XP_055342722.1, XP_055342723.1, XP_055342724.1	GAU93332.1
OG0001023	g11634.t1, g12877.t1, g13200.t1, g13755.t1, g13756.t1	OQV25729.1	XP_055338782.1, XP_055338783.1	GAU88389.1, GAU88396.1
OG0001024	g569.t1	OQV21625.1, OQV21629.1	XP_055338997.1, XP_055339000.1, XP_055339001.1	GAU88295.1, GAU88296.1, GAU88297.1, GAU88299.1
OG0001025	g615.t1, g615.t2	OQV25759.1, OQV25760.1	XP_055338700.1, XP_055338704.1, XP_055338705.1	GAU88441.1, GAU88442.1, GAU88443.1
OG0001026	g1631.t1, g1640.t1	OQV21061.1	XP_055327273.1, XP_055327274.1	GAU91072.1, GAU91073.1, GAU91075.1, GAU91076.1, GAU91077.1
OG0001027	g1666.t1	OQV24657.1, OQV24658.1	XP_055332609.1, XP_055332610.1, XP_055332611.1, XP_055332998.1	GAU94298.1, GAU94299.1, GAU94300.1
OG0001028	g1703.t1	OQV17154.1	XP_055340178.1, XP_055340179.1, XP_055340180.1, XP_055340181.1, XP_055340182.1, XP_055340183.1	GAU98720.1, GAU98721.1
OG0001029	g2936.t1	OQV18177.1, OQV18178.1	XP_055341858.1, XP_055343813.1, XP_055343814.1, XP_055343815.1	GAU96101.1, GAU96102.1, GAU96103.1
OG0001030	g3281.t1	OQV17162.1, OWA50024.1	XP_055334618.1, XP_055334619.1, XP_055334620.1, XP_055334621.1, XP_055339863.1	GAU87211.1, GAU96769.1
OG0001031	g3294.t1	OQV13567.1, OWA55045.1	XP_055339750.1, XP_055339751.1, XP_055339752.1, XP_055339753.1, XP_055339754.1, XP_055339756.1	GAV03062.1
OG0001032	g3305.t1	OWA54408.1	XP_055340101.1, XP_055340102.1, XP_055340103.1, XP_055340104.1, XP_055340105.1	GAU98673.1, GAU98674.1, GAU98675.1
OG0001033	g3331.t1	OQV14101.1	XP_055339986.1, XP_055348286.1, XP_055348287.1, XP_055348289.1, XP_055348290.1, XP_055348291.1, XP_055348306.1	GAV07924.1
OG0001034	g4026.t1	OQV13540.1	XP_055329659.1, XP_055329660.1, XP_055329661.1, XP_055329662.1, XP_055329663.1, XP_055329665.1, XP_055329666.1	GAV06728.1
OG0001035	g4063.t1	OQV24060.1	XP_055340333.1, XP_055340334.1, XP_055340340.1, XP_055340456.1, XP_055340477.1, XP_055340478.1, XP_055349656.1	GAV02496.1
OG0001036	g4410.t1	OQV17218.1, OQV21606.1, OQV26002.1, OQV26003.1, OQV26004.1	XP_055338819.1	GAU88276.1, GAU88277.1, GAU88278.1
OG0001037	g4414.t1, g6493.t1	OQV19543.1, OQV21611.1, OQV24841.1	XP_055338672.1, XP_055345415.1	GAU88285.1, GAV08627.1, GAV08628.1
OG0001038	g5358.t1, g5358.t2	OQV17479.1, OQV17480.1, OQV25871.1	XP_055351466.1, XP_055351468.1, XP_055351469.1, XP_055351470.1	GAV04583.1
OG0001039	g14612.t1, g1575.t1, g5899.t1, g5907.t1, g5910.t1, g5912.t1, g6103.t1	OQV23841.1	XP_055342892.1	GAU93183.1
OG0001040	g2779.t1, g7032.t1, g7033.t1	OQV23220.1, OQV23221.1	XP_055338360.1, XP_055338361.1, XP_055338362.1, XP_055338364.1	GAU93598.1
OG0001041	g7035.t1	OQV23223.1, OQV23224.1	XP_055338238.1, XP_055338239.1, XP_055338240.1, XP_055338241.1, XP_055338242.1, XP_055338243.1	GAU93593.1
OG0001042	g7060.t1	OQV18940.1, OQV18941.1	XP_055356072.1, XP_055356073.1, XP_055356074.1, XP_055356075.1, XP_055356076.1, XP_055356077.1	GAU93752.1
OG0001043	g7735.t1	OQV23206.1	XP_055338115.1, XP_055338116.1, XP_055338117.1, XP_055338118.1, XP_055338119.1, XP_055338120.1, XP_055338121.1	GAU93608.1
OG0001044	g7748.t1	OQV23199.1, OQV23200.1	XP_055337999.1, XP_055338000.1, XP_055338001.1, XP_055338002.1, XP_055338003.1	GAU93616.1, GAU93617.1
OG0001045	g7983.t1	OQV14240.1, OQV25001.1	XP_055337665.1, XP_055344656.1, XP_055344658.1	GAU91403.1, GAU92926.1, GAV03197.1, GAV03198.1
OG0001046	g8138.t1	OQV24706.1	XP_055331849.1, XP_055331850.1, XP_055331851.1, XP_055331852.1, XP_055331853.1, XP_055331854.1, XP_055331855.1	GAV07392.1
OG0001047	g8889.t1	OQV24259.1	XP_055338004.1, XP_055338176.1	GAV01177.1, GAV01178.1, GAV03719.1, GAV03724.1, GAV03725.1, GAV09878.1
OG0001048	g8931.t1	OQV24351.1	XP_055338272.1, XP_055338273.1, XP_055338274.1, XP_055338275.1, XP_055338276.1, XP_055338277.1, XP_055338278.1	GAU93536.1
OG0001049	g9725.t1	OQV16777.1	XP_055343818.1, XP_055343827.1, XP_055349705.1, XP_055350154.1, XP_055351315.1, XP_055356365.1	GAU88850.1, GAU95478.1
OG0001050	g9767.t1, g9767.t2	OWA51543.1, OWA51545.1	XP_055336608.1	GAU94577.1, GAU94578.1, GAU96645.1, GAU96652.1, GAU96654.1
OG0001051	g11335.t1, g11335.t2	OQV15266.1, OQV15267.1, OQV15270.1	XP_055345786.1, XP_055345787.1, XP_055345788.1, XP_055345789.1	GAU93988.1
OG0001052	g12084.t1, g12084.t2	OQV15927.1, OQV15928.1, OQV15929.1, OQV17495.1, OQV19099.1	XP_055347028.1, XP_055347048.1	GAV06627.1
OG0001053	g12459.t1	OQV22500.1	XP_055335481.1, XP_055335482.1, XP_055335483.1, XP_055335484.1, XP_055335487.1, XP_055335488.1	GAU97648.1, GAU97649.1
OG0001054	g13928.t1	OQV15309.1, OQV15310.1, OQV25747.1	XP_055354460.1	GAV04269.1, GAV04270.1, GAV04271.1, GAV04272.1, GAV04273.1
OG0001055	g14305.t1	OQV18481.1	XP_055338124.1, XP_055338125.1, XP_055338126.1, XP_055338127.1, XP_055338128.1, XP_055338129.1, XP_055338130.1	GAU98239.1
OG0001056	g14678.t1	OQV25338.1, OQV25339.1	XP_055328080.1, XP_055328081.1, XP_055328082.1, XP_055328083.1, XP_055328084.1, XP_055328085.1	GAV07951.1
OG0001057	g253.t1	OQV14149.1, OQV24119.1	XP_055334405.1, XP_055354181.1, XP_055354182.1, XP_055354183.1	GAU87923.1, GAV06963.1, GAV06964.1
OG0001058	g673.t1	OQV15091.1, OQV15092.1, OWA55526.1	XP_055336838.1, XP_055336840.1, XP_055336841.1, XP_055336842.1, XP_055336843.1	GAU98416.1
OG0001059	g1004.t1	OQV25063.1, OQV25064.1, OQV25065.1	XP_055351394.1	GAU92976.1, GAU92977.1, GAU92978.1, GAU92979.1, GAU92980.1
OG0001060	g1038.t1	OQV25349.1	XP_055339585.1, XP_055339586.1, XP_055339587.1, XP_055339588.1, XP_055339589.1, XP_055339590.1	GAV04403.1, GAV04404.1
OG0001061	g2048.t1	OWA54264.1, OWA54265.1	XP_055338845.1, XP_055338846.1, XP_055338848.1, XP_055338849.1, XP_055338850.1	GAU90887.1, GAU90888.1
OG0001062	g2281.t1	OQV18287.1, OQV18288.1, OQV18289.1, OQV18290.1	XP_055331767.1, XP_055331931.1, XP_055332028.1, XP_055332196.1	GAU97421.1
OG0001063	g3191.t1, g9555.t1	OWA52305.1, OWA53660.1	XP_055334728.1, XP_055334730.1, XP_055334731.1, XP_055334732.1, XP_055334737.1	GAU87907.1
OG0001064	g3258.t1	OQV11431.1, OQV11432.1, OQV11433.1, OQV11435.1	XP_055333363.1, XP_055333364.1, XP_055333365.1, XP_055333366.1	GAU97134.1
OG0001065	g3831.t1	OWA52360.1	XP_055349025.1, XP_055354728.1, XP_055354729.1, XP_055354730.1, XP_055354731.1, XP_055356534.1, XP_055357081.1	GAU99774.1
OG0001066	g4206.t1	OQV16060.1	XP_055327466.1, XP_055353659.1, XP_055353660.1, XP_055353661.1, XP_055353662.1, XP_055353663.1, XP_055353664.1	GAV09001.1
OG0001067	g11263.t1, g11263.t2, g120.t1, g2098.t1, g3958.t1, g4233.t1		XP_055334710.1	GAU87941.1, GAU87942.1, GAU87943.1
OG0001068	g4749.t1	OQV16852.1	XP_055337274.1, XP_055350370.1, XP_055350415.1, XP_055350418.1, XP_055353588.1, XP_055353595.1, XP_055353598.1	GAV02167.1
OG0001069	g5895.t1	OWA53124.1	XP_055333349.1, XP_055333350.1, XP_055333351.1, XP_055333352.1, XP_055333356.1, XP_055333357.1, XP_055333545.1	GAV08078.1
OG0001070	g6250.t1, g6251.t1, g6267.t1	OQV18448.1	XP_055341444.1, XP_055341445.1, XP_055341446.1, XP_055341447.1, XP_055341448.1	GAV07899.1
OG0001071	g7006.t1	OQV14464.1, OQV14465.1, OQV14466.1, OQV14467.1	XP_055346190.1, XP_055352150.1	GAV01192.1, GAV01266.1, GAV01280.1
OG0001072	g7702.t1	OWA50679.1	XP_055337409.1, XP_055337410.1, XP_055337411.1, XP_055337412.1, XP_055337413.1, XP_055337414.1, XP_055337415.1	GAU92723.1
OG0001073	g7917.t1	OQV24115.1	XP_055342114.1, XP_055342115.1, XP_055342120.1, XP_055342209.1, XP_055342210.1, XP_055342211.1, XP_055342212.1	GAV06974.1
OG0001074	g8085.t1	OQV16796.1, OWA53368.1	XP_055336999.1, XP_055337000.1, XP_055337043.1, XP_055352438.1, XP_055352439.1	GAV04732.1, GAV09333.1
OG0001075	g8775.t1	OQV18230.1	XP_055333433.1, XP_055333434.1, XP_055333435.1, XP_055333436.1, XP_055333437.1	GAU98440.1, GAU98441.1, GAU98442.1
OG0001076	g10486.t1, g9482.t1	OQV17196.1, OQV17197.1, OQV17199.1, OQV17205.1, OQV17212.1, OWA55577.1	XP_055347146.1	GAU90015.1
OG0001077	g4342.t1, g9973.t1	OQV13061.1, OQV23526.1, OQV23527.1	XP_055341059.1, XP_055341060.1, XP_055341534.1	GAU91815.1, GAV05069.1
OG0001078	g10091.t1	OQV12761.1, OQV17673.1	XP_055345605.1, XP_055345606.1, XP_055345607.1, XP_055345608.1, XP_055351292.1	GAV03321.1, GAV08252.1
OG0001079	g10951.t1	OQV12114.1, OQV24205.1	XP_055347025.1, XP_055347026.1, XP_055350611.1, XP_055350621.1, XP_055350622.1	GAV00175.1, GAV07099.1
OG0001080	g12032.t1	OQV17222.1	XP_055352993.1, XP_055353000.1, XP_055353008.1, XP_055353016.1, XP_055353024.1, XP_055353032.1, XP_055353039.1	GAV08635.1
OG0001081	g12926.t1, g15672.t1	OWA52578.1	XP_055329224.1, XP_055329225.1, XP_055329227.1, XP_055329228.1, XP_055329229.1, XP_055329230.1	GAU98938.1
OG0001082	g13939.t1	OQV25448.1	XP_055330213.1, XP_055330214.1, XP_055330220.1, XP_055330221.1, XP_055355805.1, XP_055355820.1, XP_055355823.1	GAU93972.1
OG0001083	g14401.t1	OWA52008.1	XP_055328475.1, XP_055328477.1, XP_055328478.1, XP_055328479.1, XP_055328480.1, XP_055328481.1, XP_055328482.1	GAU90847.1
OG0001084	g14403.t1	OQV21767.1	XP_055340567.1, XP_055340575.1, XP_055340583.1, XP_055340591.1, XP_055340599.1, XP_055340607.1, XP_055340615.1	GAV03611.1
OG0001085	g14138.t1, g14138.t2	OQV15628.1, OQV16316.1	XP_055327628.1, XP_055328009.1, XP_055328251.1, XP_055349443.1	GAV05569.1, GAV05923.1
OG0001086	g14162.t1, g14162.t2	OQV16517.1	XP_055328571.1, XP_055328572.1, XP_055328573.1, XP_055328574.1, XP_055328575.1, XP_055328576.1	GAV05529.1
OG0001087	g14210.t1, g7536.t1	OQV25774.1, OWA50544.1	XP_055327439.1, XP_055327440.1, XP_055327441.1, XP_055335819.1	GAV03475.1, GAV04399.1
OG0001088	g15014.t1	OQV19457.1, OWA54278.1	XP_055343295.1, XP_055343296.1, XP_055343297.1, XP_055343298.1, XP_055343299.1, XP_055343300.1	GAU97781.1
OG0001089	g1128.t1	OQV13851.1, OQV13852.1, OQV13853.1, OQV13854.1	XP_055335239.1, XP_055335456.1, XP_055335457.1	GAU97710.1, GAU97712.1
OG0001090	g6355.t1	OQV21131.1, OQV21132.1		GAV04451.1, GAV04452.1, GAV05951.1, GAV05952.1, GAV05953.1, GAV10026.1, GAV10035.1
OG0001091	g6641.t1	OQV16749.1	XP_055357891.1, XP_055357892.1, XP_055357893.1, XP_055357895.1, XP_055357896.1	GAU95348.1, GAU95349.1, GAU95350.1
OG0001092	g6866.t1	OWA50722.1, OWA50723.1, OWA50724.1, OWA54585.1	XP_055346242.1, XP_055346243.1, XP_055346244.1, XP_055353737.1	GAU99841.1
OG0001093	g7549.t1	OQV19239.1	XP_055336956.1, XP_055336965.1, XP_055336973.1, XP_055336981.1, XP_055336990.1, XP_055336998.1, XP_055337006.1	GAV03077.1
OG0001094	g7554.t1	OQV19231.1	XP_055336656.1, XP_055336664.1, XP_055336671.1, XP_055336680.1, XP_055336688.1, XP_055336695.1, XP_055336702.1	GAV05515.1
OG0001095	g8695.t1	OWA51730.1, OWA51731.1	XP_055339579.1, XP_055339581.1, XP_055339582.1, XP_055339583.1, XP_055339584.1	GAV05708.1, GAV05709.1
OG0001096	g9390.t1, g9391.t1, g9393.t1	OQV20660.1, OQV20661.1, OQV20662.1, OWA51294.1, OWA51295.1, OWA54681.1, OWA54683.1
OG0001097	g9544.t1	OWA54913.1, OWA54914.1	XP_055334366.1, XP_055334367.1, XP_055334369.1, XP_055334370.1, XP_055334371.1, XP_055334372.1	GAU87837.1
OG0001098	g10011.t1	OQV14171.1, OQV15930.1	XP_055347046.1, XP_055357803.1, XP_055357812.1	GAU96422.1, GAU96423.1, GAU96424.1, GAV06626.1
OG0001099	g10477.t1	OQV25859.1	XP_055347621.1, XP_055347622.1, XP_055347623.1, XP_055347624.1, XP_055347625.1, XP_055347626.1, XP_055347627.1	GAV08454.1
OG0001100	g11005.t1	OQV21441.1	XP_055356421.1, XP_055356422.1, XP_055356423.1, XP_055356424.1, XP_055356425.1, XP_055356426.1	GAU96256.1, GAU96257.1
OG0001101	g11204.t1	OQV19293.1, OQV19294.1, OQV19295.1, OQV19296.1, OQV19297.1, OQV23920.1	XP_055339774.1, XP_055339775.1	GAV02933.1
OG0001102	g11463.t1, g11464.t1	OQV25667.1, OWA53579.1	XP_055349493.1, XP_055349557.1, XP_055355755.1, XP_055355756.1	GAU99724.1, GAU99725.1
OG0001103	g11583.t1, g12560.t1	OQV19896.1, OQV19897.1, OQV25500.1, OQV25501.1	XP_055335774.1, XP_055335775.1, XP_055353563.1	GAU96527.1
OG0001104	g12629.t1	OWA53164.1	XP_055346062.1, XP_055346087.1, XP_055346088.1, XP_055346090.1, XP_055346091.1	GAU88408.1, GAU97946.1, GAU97947.1
OG0001105	g12632.t1	OWA53167.1	XP_055346159.1	GAU87410.1, GAU87411.1, GAU87412.1, GAU87413.1, GAU87415.1, GAU87416.1, GAV08612.1
OG0001106	g13506.t1			GAU88579.1, GAU88580.1, GAU88581.1, GAU88617.1, GAU89735.1, GAU95180.1, GAU95969.1, GAV04971.1, GAV09777.1
OG0001107	g15125.t1	OQV11484.1	XP_055343665.1, XP_055343666.1, XP_055343667.1, XP_055343670.1, XP_055343671.1, XP_055343672.1, XP_055343673.1	GAV04515.1
OG0001108	g414.t1	OQV12790.1	XP_055327649.1, XP_055327650.1, XP_055350530.1, XP_055354584.1, XP_055354585.1	GAV02664.1, GAV02665.1, GAV03861.1
OG0001109	g865.t1	OWA54118.1	XP_055337355.1, XP_055337356.1	GAU99031.1, GAU99032.1, GAU99033.1, GAU99034.1, GAU99035.1, GAV09317.1
OG0001110	g2002.t1	OQV12239.1	XP_055335446.1, XP_055335447.1, XP_055335448.1, XP_055335450.1, XP_055335451.1, XP_055335452.1, XP_055335453.1	GAU97872.1
OG0001111	g14867.t1, g2010.t1	OQV18167.1, OQV18168.1, OWA50152.1, OWA50153.1, OWA50155.1	XP_055341529.1	GAU96117.1, GAU96118.1
OG0001112	g12036.t1, g2656.t1, g3010.t1, g4923.t1	OQV12556.1, OWA53016.1, OWA53018.1		GAV01427.1, GAV01429.1, GAV01540.1
OG0001113	g3730.t1	OQV15956.1	XP_055351728.1, XP_055351729.1, XP_055351730.1, XP_055351731.1, XP_055351732.1, XP_055351733.1, XP_055351734.1	GAV06563.1
OG0001114	g4158.t1	OQV25925.1, OQV26181.1, OWA52559.1, OWA52560.1	XP_055336800.1, XP_055336801.1	GAU92010.1, GAV08860.1, GAV08861.1
OG0001115	g4565.t1	OQV26086.1	XP_055350589.1, XP_055350590.1, XP_055350591.1, XP_055350592.1, XP_055350593.1, XP_055350595.1, XP_055350596.1	GAV00227.1
OG0001116	g4894.t1	OQV15912.1, OQV25578.1, OQV25579.1, OQV25580.1	XP_055331545.1, XP_055331546.1, XP_055333859.1	GAU94531.1, GAU94532.1
OG0001117	g5030.t1	OQV16360.1	XP_055337474.1, XP_055337475.1, XP_055337476.1, XP_055337477.1, XP_055337478.1, XP_055337480.1, XP_055337481.1	GAU92788.1
OG0001118	g5678.t1	OQV21995.1	XP_055348333.1, XP_055348334.1, XP_055348335.1, XP_055348336.1, XP_055348337.1, XP_055352167.1, XP_055355248.1	GAU99025.1
OG0001119	g7232.t2	OQV23557.1	XP_055333675.1, XP_055333676.1, XP_055333677.1, XP_055333678.1, XP_055333679.1, XP_055333680.1, XP_055333681.1	GAV05161.1
OG0001120	g8877.t1	OQV19803.1	XP_055353911.1, XP_055353920.1, XP_055353926.1, XP_055353934.1, XP_055353941.1, XP_055353951.1	GAU95080.1, GAU95081.1
OG0001121	g9337.t1	OQV17251.1	XP_055356693.1, XP_055356700.1, XP_055356707.1, XP_055356714.1, XP_055356722.1, XP_055356729.1, XP_055356734.1	GAV08598.1
OG0001122	g9869.t1, g9869.t2	OQV20767.1		GAU88351.1, GAU96045.1, GAU96046.1, GAV08395.1, GAV08396.1, GAV08397.1, GAV08403.1
OG0001123	g10271.t1	OQV22851.1, OWA51235.1	XP_055344000.1, XP_055344001.1, XP_055344044.1, XP_055344058.1, XP_055344116.1, XP_055344117.1	GAV06025.1
OG0001124	g10284.t1	OQV12001.1	XP_055335424.1, XP_055335425.1, XP_055335426.1, XP_055335428.1, XP_055356932.1, XP_055356933.1, XP_055356934.1	GAU97839.1
OG0001125	g10407.t1	OQV16790.1, OQV16791.1, OQV18355.1	XP_055333933.1, XP_055334025.1, XP_055334026.1, XP_055334028.1	GAU95515.1, GAU95516.1
OG0001126	g10552.t1, g11040.t1	OQV22826.1, OQV22827.1	XP_055329790.1, XP_055344012.1, XP_055344013.1, XP_055344014.1	GAV06367.1, GAV07579.1
OG0001127	g12325.t1	OQV25728.1	XP_055338725.1, XP_055338727.1, XP_055338728.1, XP_055338729.1, XP_055338730.1, XP_055338731.1, XP_055338732.1	GAU88405.1
OG0001128	g12499.t1, g12499.t2	OQV21828.1, OQV21829.1, OQV21830.1	XP_055334517.1, XP_055334526.1, XP_055334535.1, XP_055334552.1	GAV03609.1
OG0001129	g13376.t1, g13376.t2	OQV22909.1, OQV22910.1	XP_055336768.1, XP_055336769.1, XP_055336770.1, XP_055336771.1	GAV08440.1, GAV08441.1
OG0001130	g13687.t1	OQV14084.1	XP_055336271.1, XP_055336272.1, XP_055336273.1, XP_055336274.1, XP_055336275.1, XP_055336276.1, XP_055336277.1	GAV08273.1
OG0001131		OQV11440.1	XP_055333277.1, XP_055333278.1, XP_055333279.1, XP_055333280.1, XP_055333281.1, XP_055333282.1, XP_055333283.1, XP_055333284.1	GAV06953.1
OG0001132		OQV11450.1, OQV19491.1, OQV20070.1, OQV24749.1, OWA53647.1, OWA53653.1	XP_055332226.1, XP_055334411.1, XP_055353915.1, XP_055353969.1
OG0001133		OQV11569.1, OQV14463.1, OQV18827.1, OQV18894.1, OQV20072.1, OQV22671.1, OQV23668.1, OQV23669.1, OQV25488.1, OWA50501.1
OG0001134		OQV11580.1, OQV15543.1, OQV15544.1, OQV15545.1, OQV15546.1, OQV15547.1, OQV15548.1, OQV20445.1, OQV20446.1	XP_055331179.1
OG0001135		OQV11809.1, OQV11810.1, OQV11812.1, OQV11813.1, OQV11814.1, OQV11815.1, OQV11816.1, OQV11821.1, OQV13414.1, OQV13415.1
OG0001136		OQV12321.1, OQV12322.1, OQV12323.1, OQV15896.1, OQV16106.1, OQV17441.1, OQV23177.1, OQV23178.1	XP_055331237.1, XP_055343306.1
OG0001137		OQV12488.1, OQV12489.1, OQV16382.1, OQV16383.1, OQV16385.1, OQV16386.1, OQV16387.1, OWA53610.1, OWA53612.1		GAV05297.1
OG0001138		OQV13056.1	XP_055345849.1, XP_055345850.1, XP_055345851.1, XP_055345852.1, XP_055345853.1, XP_055345854.1, XP_055345855.1	GAU90229.1, GAU90232.1
OG0001139		OQV13252.1, OQV13253.1, OQV15441.1, OQV15446.1, OQV15453.1, OQV18427.1, OQV21854.1, OWA54732.1, OWA54736.1, OWA54843.1
OG0001140		OQV13528.1, OQV13531.1, OQV13532.1, OQV13534.1, OQV13535.1, OQV19775.1, OWA54329.1, OWA54332.1, OWA54336.1, OWA54340.1
OG0001141		OQV13637.1, OQV14365.1, OWA51612.1, OWA52335.1, OWA52336.1, OWA52548.1, OWA53002.1, OWA53003.1, OWA53735.1, OWA55588.1
OG0001142		OQV13646.1	XP_055332118.1, XP_055332119.1, XP_055332120.1, XP_055332121.1, XP_055332122.1, XP_055332123.1, XP_055332124.1, XP_055332125.1	GAU97060.1
OG0001143		OQV14752.1, OQV14753.1, OQV16133.1, OQV16136.1, OQV18412.1, OQV18413.1, OQV22209.1, OQV24950.1, OQV24951.1	XP_055347564.1
OG0001144		OQV14768.1, OQV14769.1	XP_055339925.1, XP_055339927.1, XP_055339928.1, XP_055339929.1, XP_055339930.1	GAV07861.1, GAV07862.1, GAV07863.1
OG0001145		OQV14912.1, OQV15283.1, OQV16602.1, OQV17279.1, OQV17280.1, OQV21188.1, OQV22116.1, OQV23544.1, OWA53819.1, OWA53820.1
OG0001146		OQV16857.1, OQV16858.1, OQV23351.1, OQV24722.1	XP_055337218.1, XP_055337219.1, XP_055337220.1, XP_055337221.1, XP_055337223.1	GAV02171.1
OG0001147		OQV18312.1, OQV18313.1, OQV18314.1, OQV25443.1, OQV25444.1, OQV25445.1, OQV25446.1	XP_055346049.1, XP_055347485.1, XP_055348568.1
OG0001148		OQV19201.1, OQV19204.1, OQV19205.1, OWA55468.1	XP_055336779.1, XP_055338609.1, XP_055354108.1, XP_055354110.1, XP_055354130.1	GAV02596.1
OG0001149		OQV19614.1, OQV19615.1, OQV19699.1, OWA52032.1		GAU96044.1, GAV01958.1, GAV01992.1, GAV01993.1, GAV01994.1, GAV01995.1
OG0001150		OQV24288.1, OQV24289.1, OQV25449.1, OQV25450.1, OQV25451.1, OQV25964.1, OWA50186.1, OWA50187.1, OWA53031.1, OWA54507.1
OG0001151		OWA49917.1, OWA49918.1	XP_055345902.1, XP_055351765.1, XP_055351766.1, XP_055351767.1	GAU90268.1, GAU90269.1, GAU90270.1, GAU90541.1
OG0001152			XP_055327250.1, XP_055327251.1, XP_055327252.1, XP_055327253.1, XP_055327255.1, XP_055327256.1, XP_055327257.1, XP_055349545.1, XP_055349546.1, XP_055350492.1
OG0001153			XP_055328249.1, XP_055348440.1, XP_055351962.1, XP_055351971.1, XP_055351981.1, XP_055351989.1, XP_055351997.1, XP_055352004.1, XP_055352015.1, XP_055352023.1
OG0001154			XP_055328763.1, XP_055348030.1, XP_055348301.1, XP_055350320.1, XP_055350321.1, XP_055350322.1, XP_055350324.1, XP_055350325.1, XP_055350329.1, XP_055350330.1
OG0001155			XP_055329587.1, XP_055336551.1, XP_055336755.1, XP_055340771.1, XP_055341955.1, XP_055352321.1, XP_055353306.1, XP_055355783.1, XP_055356134.1, XP_055357486.1
OG0001156			XP_055329599.1, XP_055329968.1, XP_055330116.1, XP_055330117.1, XP_055330118.1, XP_055330119.1, XP_055330120.1, XP_055330121.1, XP_055335846.1, XP_055335847.1
OG0001157			XP_055330687.1, XP_055336105.1, XP_055336106.1, XP_055341429.1, XP_055342621.1, XP_055342622.1, XP_055350332.1, XP_055352326.1, XP_055357551.1, XP_055357553.1
OG0001158			XP_055332339.1, XP_055340572.1, XP_055340598.1, XP_055340600.1, XP_055340680.1, XP_055348587.1, XP_055348588.1, XP_055349110.1, XP_055350172.1, XP_055352997.1
OG0001159			XP_055333329.1, XP_055334217.1, XP_055334314.1, XP_055344553.1, XP_055349763.1, XP_055349765.1, XP_055351595.1, XP_055355920.1, XP_055355926.1, XP_055356592.1
OG0001160			XP_055335714.1, XP_055335944.1, XP_055340859.1, XP_055341999.1, XP_055342000.1, XP_055342001.1, XP_055342003.1, XP_055342056.1, XP_055344109.1, XP_055351846.1
OG0001161			XP_055335973.1, XP_055335974.1, XP_055335976.1, XP_055335977.1, XP_055335978.1, XP_055335979.1, XP_055335980.1, XP_055335981.1, XP_055335982.1, XP_055335983.1
OG0001162			XP_055336084.1, XP_055336085.1, XP_055336086.1, XP_055336087.1, XP_055336089.1, XP_055336090.1, XP_055356774.1, XP_055356775.1, XP_055356776.1, XP_055356777.1
OG0001163			XP_055337067.1, XP_055347620.1, XP_055350894.1, XP_055352117.1	GAU89082.1, GAU90479.1, GAU90481.1, GAU90900.1, GAV02581.1, GAV09105.1
OG0001164			XP_055339244.1, XP_055339245.1, XP_055339321.1, XP_055339323.1, XP_055339365.1, XP_055339373.1, XP_055339378.1, XP_055339383.1, XP_055339396.1, XP_055339398.1
OG0001165			XP_055340107.1, XP_055346122.1, XP_055346123.1, XP_055346124.1, XP_055346126.1, XP_055347125.1, XP_055348550.1, XP_055348552.1, XP_055350899.1, XP_055354523.1
OG0001166			XP_055340702.1, XP_055340703.1, XP_055340704.1, XP_055340705.1, XP_055340706.1, XP_055340707.1, XP_055340708.1, XP_055340709.1, XP_055349490.1, XP_055349491.1
OG0001167			XP_055341576.1, XP_055341577.1, XP_055341792.1, XP_055341793.1, XP_055344844.1, XP_055348720.1, XP_055348736.1, XP_055353513.1, XP_055353955.1, XP_055353956.1
OG0001168			XP_055342420.1, XP_055347586.1, XP_055347587.1, XP_055347998.1, XP_055348020.1, XP_055348041.1, XP_055355830.1, XP_055356117.1, XP_055356129.1, XP_055357493.1
OG0001169			XP_055342577.1, XP_055342585.1, XP_055342586.1, XP_055342587.1, XP_055342588.1, XP_055342632.1, XP_055342650.1, XP_055342651.1, XP_055344972.1, XP_055352941.1
OG0001170			XP_055347852.1, XP_055347853.1, XP_055347854.1, XP_055347855.1, XP_055347856.1, XP_055347857.1, XP_055347859.1, XP_055347860.1, XP_055347861.1, XP_055348009.1
OG0001171			XP_055348053.1, XP_055348141.1, XP_055348142.1, XP_055348143.1, XP_055348146.1, XP_055348152.1, XP_055348153.1, XP_055355180.1, XP_055355181.1, XP_055355182.1
OG0001172			XP_055348997.1, XP_055349005.1, XP_055350052.1, XP_055350057.1, XP_055350058.1, XP_055350059.1, XP_055350066.1, XP_055350778.1, XP_055356367.1, XP_055356368.1
OG0001173			XP_055355306.1, XP_055355308.1, XP_055355309.1, XP_055355310.1, XP_055355311.1, XP_055355312.1, XP_055355314.1, XP_055355315.1, XP_055355316.1, XP_055355317.1
OG0001174				GAV00442.1, GAV00443.1, GAV00444.1, GAV00448.1, GAV00449.1, GAV00450.1, GAV00451.1, GAV00452.1, GAV08292.1, GAV08921.1
OG0001175	g10099.t1, g11513.t1, g13704.t1, g14640.t1, g14879.t1, g15148.t1, g15241.t1, g6453.t1, g7888.t1
OG0001176	g11767.t1, g11867.t1, g14472.t1	OWA52369.1, OWA52608.1, OWA53441.1, OWA54451.1, OWA54932.1		GAV06659.1
OG0001177	g11793.t1, g13779.t1, g2718.t1, g4119.t1, g4938.t1, g5506.t1, g6196.t1, g6792.t1, g6954.t1
OG0001178	g11247.t1, g12027.t1, g12211.t1, g13406.t1, g15426.t1, g2830.t1, g6981.t1, g790.t1, g7957.t1
OG0001179	g10487.t1, g13277.t1, g13409.t1, g4332.t1, g5556.t1, g558.t1, g6166.t1			GAU89605.1, GAU91850.1
OG0001180	g2228.t1, g2228.t2, g2835.t1, g4763.t1	OQV13261.1	XP_055353572.1, XP_055353573.1	GAU95354.1, GAU95355.1
OG0001181			XP_055352189.1, XP_055352198.1, XP_055352206.1, XP_055352214.1, XP_055352220.1, XP_055352228.1, XP_055352237.1, XP_055352245.1, XP_055357343.1
OG0001182	g11877.t1, g1330.t1, g5456.t1, g6292.t1, g778.t1, g7902.t1, g7904.t1, g8627.t1	OWA54058.1
OG0001183		OQV11697.1, OQV23362.1, OQV24881.1, OQV24882.1, OQV25274.1, OQV25680.1, OQV25690.1, OQV26233.1, OQV26235.1
OG0001184	g13777.t1	OQV17428.1, OQV17430.1, OQV18999.1, OQV20596.1, OQV20601.1, OWA52595.1	XP_055331078.1	GAU99928.1
OG0001185	g4511.t1	OQV21886.1, OQV21900.1	XP_055356125.1, XP_055356127.1, XP_055356128.1	GAU88802.1, GAU88803.1, GAU88804.1
OG0001186	g12585.t1, g4008.t1	OQV16657.1, OQV16658.1, OQV16659.1	XP_055340024.1	GAU92203.1, GAU92828.1, GAV01148.1
OG0001187	g10098.t1, g11642.t1, g13598.t1, g2920.t1, g3747.t1	OWA52477.1	XP_055357357.1	GAU89229.1, GAU89230.1
OG0001188	g8381.t1, g8382.t1, g8390.t1	OQV25920.1, OQV26149.1, OWA50581.1, OWA50583.1, OWA54759.1, OWA54760.1
OG0001189	g11758.t1, g13967.t1, g14628.t1, g4696.t1, g6744.t1, g7284.t1, g7284.t2	OQV18866.1, OQV18867.1
OG0001190	g10633.t1, g12702.t1, g13043.t1, g15425.t1, g3707.t1, g3708.t1, g555.t1	OQV15617.1, OWA54312.1
OG0001191	g8497.t1		XP_055329586.1, XP_055336555.1, XP_055340230.1, XP_055342576.1, XP_055345373.1, XP_055348976.1, XP_055353690.1, XP_055356330.1
OG0001192	g445.t1, g446.t1, g447.t1	OQV15944.1, OQV23097.1, OQV23099.1, OWA50293.1, OWA55611.1	XP_055342659.1
OG0001193	g15163.t1, g15645.t1, g349.t1, g5302.t1, g5722.t1, g5722.t2	OQV12348.1	XP_055350199.1	GAV02957.1
OG0001194	g10527.t1, g10528.t1, g15497.t1, g5888.t1, g6799.t1, g8356.t1	OQV17667.1, OQV18741.1		GAU88968.1
OG0001195	g10865.t1	OQV18887.1, OQV18888.1, OWA49967.1	XP_055351990.1, XP_055351991.1, XP_055351992.1, XP_055357606.1	GAU95054.1
OG0001196	g3171.t1, g5890.t1, g8105.t1	OQV11867.1, OQV24849.1, OWA51382.1	XP_055344420.1, XP_055344421.1	GAU96425.1
OG0001197	g5594.t1	OQV14332.1, OQV14333.1, OQV15485.1, OQV15486.1	XP_055330501.1, XP_055347240.1, XP_055347241.1, XP_055351013.1
OG0001198	g6761.t1, g6762.t1, g8731.t1	OQV21181.1, OWA49961.1	XP_055331901.1, XP_055343633.1	GAV01395.1, GAV05838.1
OG0001199	g13646.t1	OQV20845.1	XP_055341878.1, XP_055341879.1, XP_055341880.1	GAU96126.1, GAU96127.1, GAV07607.1, GAV07608.1
OG0001200		OQV19554.1, OQV19555.1, OQV19556.1, OWA52452.1, OWA52453.1, OWA55183.1		GAU96506.1, GAU96507.1, GAU96511.1
OG0001201	g4827.t1	OQV17465.1, OQV17467.1	XP_055330994.1, XP_055330996.1, XP_055330997.1, XP_055357499.1	GAV03372.1, GAV03373.1
OG0001202	g10367.t1, g10367.t2	OQV12106.1, OQV22259.1, OWA54371.1, OWA54372.1	XP_055337774.1, XP_055354050.1	GAV03998.1
OG0001203	g11037.t1, g11564.t1, g11565.t1, g13512.t1, g14644.t1, g7569.t1		XP_055354098.1	GAU92218.1, GAV05489.1
OG0001204	g14529.t1	OWA53350.1	XP_055336597.1, XP_055336598.1, XP_055336599.1, XP_055336600.1, XP_055336601.1	GAU99084.1, GAU99085.1
OG0001205	g7163.t1	OQV19393.1	XP_055339275.1, XP_055339283.1, XP_055339289.1, XP_055339297.1, XP_055339305.1, XP_055339311.1	GAV07845.1
OG0001206	g12163.t1	OQV12233.1, OQV15115.1, OWA53972.1	XP_055334159.1, XP_055335410.1	GAU87577.1, GAU97875.1, GAV08798.1
OG0001207	g3472.t1, g3472.t2	OQV12940.1, OWA50709.1	XP_055328832.1, XP_055333167.1, XP_055333557.1	GAU98739.1, GAV07957.1
OG0001208	g269.t1	OQV13435.1	XP_055334667.1, XP_055334668.1, XP_055334669.1, XP_055334670.1, XP_055334673.1, XP_055334674.1, XP_055334675.1
OG0001209	g10431.t1	OQV17030.1	XP_055336226.1, XP_055336234.1, XP_055336243.1, XP_055336251.1, XP_055336259.1, XP_055336266.1	GAV08967.1
OG0001210	g11388.t1, g11388.t2	OQV23305.1, OQV23306.1	XP_055354610.1, XP_055354620.1	GAV00515.1, GAV00516.1, GAV00517.1
OG0001211	g7514.t1	OQV22068.1	XP_055336093.1, XP_055336094.1, XP_055336095.1, XP_055336096.1, XP_055336097.1	GAV03140.1, GAV03141.1
OG0001212	g7231.t1	OQV11462.1, OQV11463.1, OQV11464.1	XP_055333620.1, XP_055333621.1, XP_055333622.1	GAV00789.1, GAV00790.1
OG0001213	g11041.t1, g14538.t1, g14539.t1	OQV20252.1	XP_055329444.1, XP_055329445.1, XP_055329446.1, XP_055329447.1	GAV02416.1
OG0001214	g539.t2	OWA49958.1	XP_055343864.1, XP_055343865.1, XP_055343866.1, XP_055343867.1, XP_055343868.1, XP_055343869.1	GAV01396.1
OG0001215	g12113.t1, g9551.t1	OQV13704.1, OQV24306.1, OWA53503.1	XP_055334360.1, XP_055357758.1	GAU87857.1, GAU91516.1
OG0001216	g12178.t1	OQV23974.1	XP_055353742.1, XP_055353743.1, XP_055353744.1, XP_055353745.1, XP_055353746.1, XP_055353747.1	GAU93341.1
OG0001217	g1691.t1, g279.t1	OQV13462.1, OQV13463.1	XP_055351250.1, XP_055352932.1	GAU87810.1, GAV08826.1, GAV08869.1
OG0001218	g10144.t1, g2758.t1, g3386.t1	OQV14447.1	XP_055339423.1, XP_055339424.1, XP_055339425.1	GAV05726.1, GAV05727.1
OG0001219	g10559.t1, g5490.t1	OQV22558.1	XP_055342720.1, XP_055345205.1, XP_055345251.1, XP_055357917.1	GAV03014.1, GAV03015.1
OG0001220	g8815.t1	OQV13047.1	XP_055354971.1, XP_055354972.1, XP_055354973.1, XP_055354974.1, XP_055354975.1, XP_055354976.1	GAU87113.1
OG0001221	g15474.t1, g9451.t1	OQV14262.1, OQV14264.1, OQV14267.1, OQV14268.1, OQV14592.1	XP_055337640.1	GAU92774.1
OG0001222	g250.t1	OQV21826.1, OQV21827.1, OQV25968.1, OWA53245.1	XP_055337885.1, XP_055355828.1	GAU92201.1, GAU92202.1
OG0001223	g13116.t1, g13707.t1, g14302.t1	OQV15629.1, OWA50309.1	XP_055353677.1	GAU87961.1, GAU95914.1, GAU95915.1
OG0001224	g10692.t1, g10703.t1, g11894.t1, g722.t1, g723.t1	OQV24762.1, OQV24763.1	XP_055343180.1	GAV08063.1
OG0001225	g3956.t1, g3957.t1, g4234.t1, g4237.t1, g4240.t1, g4245.t1, g4609.t1, g7631.t1, g9311.t1
OG0001226	g11692.t1, g11694.t1, g13319.t1, g14134.t1, g4719.t1, g8966.t1	OQV14987.1	XP_055342236.1	GAU93868.1
OG0001227	g13061.t1, g13273.t1, g4882.t1, g5226.t1, g712.t1	OQV19892.1	XP_055353577.1, XP_055353578.1	GAU96531.1
OG0001228	g11461.t1, g11461.t2, g4909.t1	OQV13825.1	XP_055335093.1, XP_055335094.1, XP_055335095.1, XP_055335096.1	GAU97732.1
OG0001229	g13607.t1, g5485.t1, g5538.t1, g5539.t1	OQV14553.1	XP_055331736.1	GAU90814.1, GAU90815.1, GAU90816.1
OG0001230	g12525.t1, g1841.t1, g2062.t1, g2469.t1, g9495.t1, g9822.t1	OQV17607.1	XP_055354489.1	GAV01895.1
OG0001231	g13618.t1, g13619.t1, g6773.t1, g6773.t2, g7480.t1	OWA53427.1	XP_055350135.1	GAU91864.1, GAU91865.1
OG0001232	g2356.t1, g4635.t1	OQV17061.1, OQV17062.1, OQV17063.1	XP_055346436.1	GAV00209.1, GAV00210.1, GAV00211.1
OG0001233	g6979.t1, g809.t1	OQV17915.1, OQV17916.1, OQV17917.1	XP_055330910.1	GAU89106.1, GAU94895.1, GAV06046.1
OG0001234	g814.t1	OQV12072.1, OQV12073.1, OQV13218.1	XP_055339115.1, XP_055352451.1, XP_055352453.1	GAV07193.1, GAV09370.1
OG0001235	g12997.t1, g14070.t1, g15380.t1, g15553.t1, g1810.t1, g5550.t1, g727.t1, g7720.t1, g8613.t1
OG0001236	g14642.t1, g4650.t1, g8499.t1	OQV22348.1	XP_055341857.1, XP_055341863.1, XP_055341872.1, XP_055341881.1	GAV05219.1
OG0001237	g7109.t1	OQV14637.1, OQV20097.1, OQV21085.1, OQV25702.1	XP_055333576.1, XP_055335458.1	GAU88609.1, GAU97903.1
OG0001238	g7118.t1, g7118.t2	OQV23721.1	XP_055342290.1, XP_055342291.1, XP_055342292.1, XP_055342293.1, XP_055342294.1	GAU90822.1
OG0001239	g7130.t1	OQV20123.1	XP_055342163.1, XP_055342172.1, XP_055342179.1, XP_055342189.1, XP_055342198.1, XP_055342206.1	GAU97933.1
OG0001240	g7183.t1	OWA53710.1	XP_055327925.1, XP_055327926.1, XP_055327927.1, XP_055327928.1, XP_055327929.1, XP_055327930.1	GAU95972.1
OG0001241	g9179.t1	OQV11641.1, OQV11642.1	XP_055336383.1, XP_055336384.1, XP_055336385.1	GAU89177.1, GAU89178.1, GAU89179.1
OG0001242	g10776.t1, g10777.t1, g10778.t1	OQV19221.1, OQV23238.1, OWA53363.1, OWA53364.1, OWA53365.1	XP_055328923.1
OG0001243	g10787.t1	OWA51091.1	XP_055345570.1, XP_055345579.1, XP_055345587.1, XP_055345595.1, XP_055345604.1, XP_055345613.1	GAU88704.1
OG0001244	g10833.t1	OQV16947.1, OQV21086.1	XP_055349953.1, XP_055355898.1	GAU95270.1, GAV04375.1, GAV04376.1, GAV04377.1
OG0001245	g10835.t1, g15036.t1	OQV22208.1, OWA50882.1, OWA51206.1, OWA51208.1, OWA55593.1	XP_055335704.1	GAU88706.1
OG0001246	g12116.t1	OQV24264.1, OQV24265.1	XP_055338230.1, XP_055338231.1, XP_055338232.1, XP_055338233.1	GAU93412.1, GAU93413.1
OG0001247	g12174.t1	OQV23391.1, OWA50009.1	XP_055338532.1, XP_055338533.1, XP_055342282.1, XP_055342283.1	GAU88283.1, GAV06167.1
OG0001248	g13206.t1	OQV17588.1, OQV17589.1	XP_055338747.1, XP_055338748.1, XP_055338749.1	GAU88633.1, GAU88634.1, GAU88635.1
OG0001249	g15785.t1	OWA52980.1	XP_055342499.1, XP_055342509.1, XP_055342519.1, XP_055342529.1	GAU98301.1, GAV09926.1, GAV09939.1
OG0001250	g578.t1	OQV20518.1	XP_055333156.1, XP_055333157.1, XP_055333158.1, XP_055333159.1, XP_055333160.1	GAV07750.1, GAV07751.1
OG0001251	g598.t1	OQV15577.1	XP_055338883.1, XP_055338884.1, XP_055338885.1, XP_055338886.1	GAU88335.1, GAU88336.1, GAU88337.1
OG0001252	g630.t1	OQV16243.1	XP_055328115.1, XP_055328116.1, XP_055328117.1	GAV03496.1, GAV03497.1, GAV03498.1, GAV03500.1
OG0001253	g2564.t1, g2564.t2	OQV11695.1	XP_055339106.1, XP_055339107.1, XP_055339108.1	GAV04763.1, GAV04996.1, GAV05000.1
OG0001254	g2921.t1	OQV25229.1, OQV25230.1	XP_055327909.1, XP_055327910.1, XP_055327911.1, XP_055327913.1	GAV04059.1, GAV04060.1
OG0001255	g2922.t1	OQV25250.1	XP_055327571.1, XP_055327572.1, XP_055327573.1, XP_055327574.1, XP_055327575.1	GAV04049.1, GAV04050.1
OG0001256	g2930.t1	OQV24023.1, OQV24024.1, OQV24025.1	XP_055345744.1, XP_055345745.1, XP_055345746.1, XP_055345747.1	GAU90437.1
OG0001257	g2957.t1, g7634.t1	OQV13374.1, OQV13375.1	XP_055330856.1, XP_055330857.1, XP_055330858.1	GAU88525.1, GAU88526.1
OG0001258	g3311.t1, g3311.t2	OWA51750.1	XP_055340115.1, XP_055340116.1, XP_055340117.1, XP_055340118.1	GAU98665.1, GAU98666.1
OG0001259	g4068.t1	OQV16969.1, OQV18436.1, OWA52599.1, OWA54302.1	XP_055327185.1, XP_055328255.1	GAU96035.1, GAV04780.1
OG0001260	g4366.t1	OQV21540.1, OQV21541.1	XP_055341688.1, XP_055341689.1, XP_055341690.1, XP_055341691.1, XP_055341692.1	GAU88185.1
OG0001261	g4392.t1	OWA54366.1, OWA54367.1	XP_055340059.1, XP_055340061.1, XP_055340062.1, XP_055340063.1, XP_055340064.1	GAV07890.1
OG0001262	g4823.t1, g4823.t2	OQV18794.1, OQV18795.1	XP_055352847.1, XP_055352848.1	GAV00597.1, GAV00626.1, GAV00627.1
OG0001263	g4832.t1	OWA54249.1, OWA54250.1, OWA54251.1, OWA54253.1	XP_055328540.1, XP_055328541.1	GAU94304.1, GAU94305.1
OG0001264	g4844.t1	OQV13779.1	XP_055331645.1, XP_055331646.1, XP_055331647.1, XP_055331648.1, XP_055353240.1, XP_055353256.1	GAV06875.1
OG0001265	g5062.t1	OQV25189.1	XP_055328398.1, XP_055328399.1, XP_055328400.1, XP_055328401.1, XP_055328402.1, XP_055328403.1	GAV04144.1
OG0001266	g5085.t1, g8693.t1	OWA51732.1	XP_055339592.1, XP_055356790.1	GAV04077.1, GAV04078.1, GAV04079.1, GAV04080.1
OG0001267	g5099.t1	OQV25246.1, OQV25248.1, OQV25249.1, OWA55483.1	XP_055327695.1, XP_055327764.1	GAV04051.1, GAV04053.1
OG0001268	g5580.t1, g6677.t1, g6677.t2, g9806.t1	OQV21076.1	XP_055345710.1, XP_055345712.1, XP_055345713.1	GAV03283.1
OG0001269	g5585.t1, g5585.t2	OQV13039.1, OQV22304.1	XP_055330793.1, XP_055334423.1, XP_055334616.1	GAU98649.1, GAV05337.1
OG0001270	g5599.t1	OWA50034.1, OWA50035.1, OWA50038.1, OWA50039.1	XP_055334546.1, XP_055349823.1	GAU87252.1, GAU87254.1
OG0001271	g5856.t1, g5856.t2	OWA51832.1	XP_055337162.1, XP_055337163.1, XP_055337164.1, XP_055337165.1	GAU99426.1, GAU99428.1
OG0001272	g7012.t1	OQV23118.1	XP_055340992.1, XP_055340999.1, XP_055341005.1, XP_055352504.1, XP_055352880.1	GAU93706.1, GAV02783.1
OG0001273	g7038.t1	OQV23571.1	XP_055357868.1, XP_055357869.1, XP_055357870.1, XP_055357871.1	GAU89684.1, GAU96890.1, GAU96904.1
OG0001274	g7047.t1	OQV18955.1	XP_055356064.1, XP_055356065.1, XP_055356066.1, XP_055356071.1	GAU93731.1, GAU93732.1, GAU93733.1
OG0001275	g7049.t1, g7049.t2	OQV18952.1	XP_055356068.1, XP_055356069.1, XP_055356086.1, XP_055356087.1, XP_055356088.1	GAU93739.1
OG0001276	g7066.t1	OQV18935.1, OQV18936.1	XP_055342268.1, XP_055342269.1, XP_055342270.1, XP_055342271.1	GAU93766.1, GAU93767.1
OG0001277	g7744.t1	OQV23280.1, OQV23798.1	XP_055332860.1, XP_055332861.1, XP_055349338.1	GAU89138.1, GAU89139.1, GAV09245.1
OG0001278	g4925.t1, g8153.t1	OQV26090.1	XP_055332356.1, XP_055350617.1, XP_055350618.1, XP_055350619.1, XP_055350620.1	GAU91680.1
OG0001279	g12795.t1, g13958.t1, g13959.t1, g2527.t1, g8535.t1	OQV17046.1	XP_055336068.1, XP_055336076.1	GAV08959.1
OG0001280	g11574.t1, g9713.t1	OQV12471.1	XP_055343600.1, XP_055343608.1, XP_055343617.1	GAU96754.1, GAU96755.1, GAU96756.1
OG0001281	g9729.t1	OQV11425.1, OQV11426.1	XP_055343273.1, XP_055343283.1, XP_055343291.1, XP_055343301.1	GAU96673.1, GAU96674.1
OG0001282	g10342.t1	OQV19425.1	XP_055334655.1, XP_055334656.1, XP_055334657.1, XP_055334658.1, XP_055334659.1, XP_055334660.1	GAV07716.1
OG0001283	g10580.t1, g10580.t2	OQV23483.1, OQV23484.1, OQV23485.1, OQV23486.1	XP_055356081.1, XP_055356090.1	GAV04927.1
OG0001284	g11314.t1, g11314.t2, g304.t1	OQV15315.1, OQV15316.1, OQV15317.1	XP_055345991.1, XP_055345992.1	GAV09284.1
OG0001285	g11323.t1	OQV15296.1	XP_055345885.1, XP_055345886.1, XP_055345887.1, XP_055345888.1, XP_055345889.1	GAV09303.1, GAV09304.1
OG0001286	g12335.t1	OQV16249.1, OQV16250.1, OQV23127.1, OQV23128.1, OWA50931.1	XP_055328196.1	GAV04040.1, GAV04041.1
OG0001287	g12445.t1	OQV22516.1	XP_055335622.1, XP_055335623.1, XP_055335624.1, XP_055335625.1, XP_055335626.1, XP_055335628.1	GAU97667.1
OG0001288	g12850.t1	OQV23252.1	XP_055338349.1, XP_055338350.1, XP_055338351.1, XP_055338352.1, XP_055338353.1, XP_055338355.1	GAU93565.1
OG0001289	g12854.t1	OQV23245.1	XP_055338074.1, XP_055338075.1, XP_055338076.1, XP_055338077.1, XP_055338078.1, XP_055338079.1	GAU93571.1
OG0001290	g12949.t1	OWA50078.1	XP_055349402.1, XP_055349403.1, XP_055349404.1, XP_055349405.1	GAU89474.1, GAV04228.1, GAV04229.1
OG0001291	g12956.t1, g12956.t2, g12956.t3	OQV25129.1, OQV25130.1, OQV25131.1	XP_055327487.1	GAV04234.1, GAV04235.1
OG0001292	g13157.t1	OQV13223.1	XP_055335310.1, XP_055335311.1, XP_055335312.1, XP_055335313.1, XP_055335314.1	GAV07210.1, GAV07211.1
OG0001293	g13169.t1	OWA53081.1, OWA53082.1, OWA53083.1, OWA54379.1, OWA55295.1	XP_055337548.1	GAV06671.1, GAV06672.1
OG0001294	g13896.t1	OQV21208.1, OQV25812.1, OWA52790.1	XP_055331035.1, XP_055339469.1, XP_055339470.1, XP_055339471.1	GAV05798.1
OG0001295	g14009.t1, g14606.t1, g15769.t1	OQV24569.1	XP_055332746.1, XP_055332747.1, XP_055332748.1, XP_055354877.1	GAU94110.1
OG0001296	g14437.t1, g14437.t2	OQV15490.1, OQV15491.1	XP_055330056.1, XP_055330057.1, XP_055330058.1	GAU97297.1, GAU97298.1
OG0001297	g14739.t1	OQV19952.1	XP_055351645.1, XP_055351646.1	GAV06424.1, GAV06425.1, GAV06426.1, GAV06427.1, GAV06428.1
OG0001298	g14893.t1	OWA54368.1	XP_055339918.1, XP_055339919.1, XP_055339920.1, XP_055339921.1, XP_055339922.1	GAV07884.1, GAV07885.1
OG0001299	g15403.t1	OQV16182.1	XP_055333170.1, XP_055333171.1, XP_055333172.1, XP_055333173.1, XP_055333174.1	GAV01497.1, GAV01498.1
OG0001300	g15620.t1	OQV16550.1, OQV16551.1	XP_055331612.1, XP_055331613.1, XP_055331614.1, XP_055331615.1, XP_055331616.1	GAV03438.1
OG0001301	g266.t1	OQV14188.1	XP_055334560.1, XP_055334561.1, XP_055334562.1, XP_055334564.1, XP_055334565.1, XP_055334566.1	GAU87892.1
OG0001302	g272.t1, g272.t2	OQV13440.1, OQV13441.1, OQV13442.1	XP_055334361.1, XP_055334362.1	GAU88055.1, GAU88056.1
OG0001303	g652.t1	OWA53377.1, OWA53378.1, OWA53379.1, OWA53380.1	XP_055333570.1, XP_055333577.1, XP_055333584.1	GAU98493.1
OG0001304	g15059.t1, g949.t1	OQV15690.1, OWA52023.1	XP_055343331.1, XP_055343332.1, XP_055343366.1	GAV00956.1, GAV09324.1
OG0001305	g988.t1, g988.t2	OQV17833.1, OQV17834.1	XP_055329542.1, XP_055329550.1, XP_055329552.1	GAU98065.1, GAU98066.1
OG0001306	g1033.t1	OQV21093.1	XP_055339542.1, XP_055339543.1, XP_055339544.1, XP_055339545.1, XP_055339546.1, XP_055339547.1	GAV04395.1
OG0001307	g1086.t1	OQV24166.1, OQV24858.1, OQV24859.1, OQV24860.1	XP_055354179.1, XP_055354180.1	GAV07013.1, GAV07014.1
OG0001308	g2282.t1	OQV18284.1	XP_055331763.1, XP_055331765.1, XP_055331766.1	GAU97422.1, GAU97423.1, GAU97424.1, GAU97425.1
OG0001309	g2372.t1	OQV13342.1, OQV18459.1	XP_055337849.1, XP_055337859.1, XP_055347734.1, XP_055349093.1	GAU98481.1, GAV07675.1
OG0001310	g1514.t1, g3228.t1, g3237.t1	OQV15404.1, OQV18169.1	XP_055341740.1, XP_055341741.1, XP_055341742.1	GAU96116.1
OG0001311	g3613.t1	OQV22785.1, OQV22786.1, OWA49885.1		GAU90906.1, GAU90907.1, GAU90908.1, GAV09005.1, GAV09006.1
OG0001312	g3844.t1, g3846.t1	OQV21399.1	XP_055355731.1, XP_055355733.1, XP_055355738.1, XP_055355739.1, XP_055355742.1	GAU95722.1
OG0001313	g3922.t1	OQV18259.1, OQV18260.1	XP_055331957.1	GAU99220.1, GAU99221.1, GAU99222.1, GAV00183.1, GAV00184.1
OG0001314	g3966.t1	OQV13095.1, OQV13096.1	XP_055343173.1, XP_055343174.1, XP_055343175.1, XP_055349429.1, XP_055349430.1	GAV04766.1
OG0001315	g3645.t1, g4621.t1	OQV25308.1	XP_055327872.1, XP_055327874.1, XP_055327875.1, XP_055327876.1, XP_055327878.1	GAV03970.1
OG0001316	g12685.t1, g15321.t1, g4625.t1, g8243.t1	OQV15393.1, OQV15394.1, OWA52226.1	XP_055338452.1	GAV05450.1
OG0001317	g11608.t1, g12751.t1, g4734.t1	OQV15715.1, OQV22770.1, OWA53466.1, OWA55189.1	XP_055347664.1, XP_055356166.1
OG0001318	g4591.t1, g4778.t1	OQV19055.1, OQV20821.1, OQV22031.1, OWA51359.1	XP_055349684.1, XP_055350219.1	GAV03207.1
OG0001319	g7198.t1	OQV20337.1	XP_055348322.1	GAU94937.1, GAU99311.1, GAV01298.1, GAV03959.1, GAV08355.1, GAV08771.1
OG0001320	g7824.t1, g7824.t2		XP_055341237.1, XP_055341238.1, XP_055341240.1, XP_055341241.1, XP_055341242.1, XP_055341243.1	GAV03667.1
OG0001321	g206.t1, g7842.t1, g8061.t1	OQV13135.1	XP_055351209.1, XP_055351210.1, XP_055356571.1, XP_055356572.1	GAU91722.1
OG0001322	g8089.t1	OQV18129.1, OQV18130.1	XP_055334168.1, XP_055337317.1, XP_055337326.1, XP_055337333.1, XP_055337341.1	GAU96146.1
OG0001323	g13368.t1, g8445.t1	OQV24478.1	XP_055333646.1, XP_055333647.1, XP_055333648.1, XP_055333649.1, XP_055333650.1	GAU94038.1
OG0001324	g8833.t1	OWA52506.1, OWA52508.1, OWA52511.1	XP_055343902.1	GAU99788.1, GAU99789.1, GAV08473.1, GAV08474.1
OG0001325	g10302.t1, g13279.t1	OQV16779.1	XP_055331837.1, XP_055331838.1, XP_055357918.1	GAU95474.1, GAU97411.1, GAU97412.1
OG0001326	g10433.t1, g10433.t2	OQV17027.1	XP_055336195.1, XP_055336204.1	GAV08968.1, GAV08969.1, GAV08970.1, GAV08971.1
OG0001327	g10436.t1	OQV12311.1, OQV12312.1	XP_055338966.1, XP_055338973.1, XP_055338981.1, XP_055338990.1, XP_055338999.1	GAV08862.1
OG0001328	g11398.t1, g11398.t2	OQV16282.1	XP_055331505.1, XP_055331512.1, XP_055331520.1	GAV03562.1, GAV03563.1, GAV03564.1
OG0001329	g11420.t1	OQV24724.1	XP_055332256.1, XP_055332257.1, XP_055332258.1, XP_055332259.1, XP_055332260.1, XP_055332261.1	GAV07343.1
OG0001330	g12429.t1	OQV14109.1, OQV14111.1, OQV14112.1, OQV14114.1, OQV14115.1, OQV14116.1	XP_055340130.1	GAU98636.1
OG0001331	g14073.t1	OQV17493.1	XP_055343521.1, XP_055343522.1, XP_055343523.1, XP_055343524.1, XP_055343525.1, XP_055343526.1	GAV00724.1
OG0001332	g14065.t1, g2989.t1	OQV22790.1, OQV25302.1	XP_055336488.1, XP_055336489.1, XP_055336588.1	GAV05869.1, GAV08267.1
OG0001333	g2983.t1, g3026.t1, g4927.t1, g5940.t1		XP_055336573.1, XP_055351664.1	GAU87531.1, GAU90667.1, GAV01657.1
OG0001334	g7889.t1	OQV21129.1, OQV25104.1	XP_055327721.1, XP_055327722.1, XP_055327723.1, XP_055327724.1, XP_055327725.1	GAV04293.1
OG0001335	g14171.t1	OQV16531.1, OQV16532.1, OQV16536.1	XP_055327446.1, XP_055327447.1, XP_055327449.1	GAV03423.1, GAV03424.1
OG0001336	g14224.t1	OQV13983.1, OWA54424.1	XP_055341278.1, XP_055341279.1, XP_055341280.1, XP_055341281.1, XP_055341282.1	GAV03510.1
OG0001337	g14227.t1	OQV16254.1	XP_055327773.1, XP_055327774.1, XP_055327775.1, XP_055338770.1, XP_055338779.1, XP_055338787.1	GAV03512.1
OG0001338	g1121.t1	OQV12976.1, OQV12977.1, OQV24741.1, OQV24939.1, OWA52388.1, OWA52967.1	XP_055335566.1	GAU97688.1
OG0001339	g1189.t1, g8429.t1	OQV13163.1	XP_055329895.1, XP_055329899.1, XP_055349130.1	GAU88753.1, GAU88754.1, GAV09316.1
OG0001340	g2109.t1	OQV24019.1, OQV24022.1	XP_055346040.1, XP_055346041.1, XP_055346042.1, XP_055346043.1, XP_055346044.1	GAU90405.1
OG0001341	g2156.t1	OQV14536.1	XP_055335664.1, XP_055335666.1, XP_055335667.1	GAU90254.1, GAU90255.1, GAU90256.1, GAU90257.1
OG0001342	g2159.t1	OQV14532.1	XP_055346031.1, XP_055346032.1, XP_055346033.1, XP_055346034.1, XP_055346035.1	GAU90241.1, GAU90242.1
OG0001343	g2194.t1	OWA53338.1, OWA53339.1	XP_055345895.1, XP_055345896.1	GAU90174.1, GAU90175.1, GAU90176.1, GAU90177.1
OG0001344	g3642.t1	OQV25310.1, OWA50971.1	XP_055327678.1, XP_055327679.1, XP_055337445.1	GAU98266.1, GAU98267.1, GAV03973.1
OG0001345	g6384.t1	OQV17530.1, OQV17531.1, OQV21152.1	XP_055345550.1, XP_055345551.1, XP_055345600.1	GAV05917.1, GAV05919.1
OG0001346	g6882.t1, g6882.t2	OQV20944.1, OQV20945.1, OQV20946.1	XP_055332700.1, XP_055332701.1	GAU91208.1, GAU91212.1
OG0001347	g7581.t1	OQV25399.1	XP_055327971.1	GAV01176.1, GAV01971.1, GAV03720.1, GAV09879.1, GAV09945.1, GAV10013.1
OG0001348	g7584.t1	OQV25402.1, OQV25403.1	XP_055327491.1, XP_055327492.1, XP_055327493.1, XP_055327495.1, XP_055327496.1	GAV01977.1
OG0001349	g8684.t1	OQV14437.1, OQV14438.1	XP_055339606.1, XP_055339607.1, XP_055339608.1, XP_055339609.1, XP_055339610.1	GAV05735.1
OG0001350	g9098.t1, g9098.t2	OQV26088.1, OWA50444.1, OWA50445.1	XP_055343952.1	GAV00231.1, GAV04740.1, GAV04741.1
OG0001351	g9127.t1	OQV23824.1	XP_055342828.1, XP_055342829.1, XP_055342831.1, XP_055342832.1, XP_055342833.1, XP_055342834.1	GAU93154.1
OG0001352	g9571.t1, g9571.t2	OWA52322.1, OWA52323.1	XP_055351067.1, XP_055351068.1, XP_055351069.1, XP_055351070.1	GAU88003.1
OG0001353	g9582.t1	OWA50323.1	XP_055334415.1, XP_055334416.1, XP_055334417.1, XP_055334418.1, XP_055334419.1, XP_055334420.1	GAU87973.1
OG0001354	g9584.t1, g9584.t2	OWA52233.1	XP_055331725.1, XP_055334766.1, XP_055334767.1, XP_055334768.1, XP_055344195.1	GAU89949.1
OG0001355	g10026.t1	OWA53270.1	XP_055329179.1, XP_055329180.1, XP_055329181.1, XP_055329182.1, XP_055329183.1, XP_055329184.1	GAV02243.1
OG0001356	g10452.t1, g10452.t2	OQV13895.1	XP_055334855.1, XP_055334856.1, XP_055334857.1, XP_055334918.1, XP_055346660.1	GAV01723.1
OG0001357	g11194.t1	OQV25179.1	XP_055327785.1, XP_055327786.1, XP_055327787.1, XP_055327788.1, XP_055327789.1, XP_055327790.1	GAV04185.1
OG0001358	g12535.t1	OQV12908.1, OQV12909.1, OQV12910.1, OWA55575.1, OWA55624.1	XP_055348825.1	GAV00639.1, GAV00640.1
OG0001359	g12538.t1, g2873.t1	OQV14733.1, OQV18457.1	XP_055347783.1	GAV07676.1, GAV07677.1, GAV07678.1, GAV07679.1
OG0001360	g12022.t1, g13056.t1, g2006.t1, g201.t1		XP_055328933.1, XP_055338204.1, XP_055338287.1, XP_055344631.1	GAU93697.1
OG0001361	g13353.t1	OQV21354.1, OWA51508.1, OWA51509.1	XP_055345217.1, XP_055345218.1, XP_055345219.1, XP_055345220.1	GAU96338.1
OG0001362	g12290.t1, g12292.t1, g13443.t1	OQV16091.1, OQV23090.1, OWA55656.1	XP_055327554.1, XP_055344296.1, XP_055345402.1
OG0001363	g14841.t1	OQV22554.1, OWA52587.1, OWA52588.1	XP_055336881.1, XP_055346533.1, XP_055347995.1	GAV05389.1, GAV05390.1
OG0001364	g15139.t1	OQV22603.1	XP_055343780.1, XP_055343781.1, XP_055343782.1, XP_055343963.1, XP_055351898.1	GAU99039.1, GAV04798.1
OG0001365	g15142.t1	OQV22594.1	XP_055343785.1, XP_055343786.1, XP_055343935.1, XP_055343936.1, XP_055343937.1, XP_055356041.1	GAV04801.1
OG0001366	g15188.t1	OQV12313.1, OQV15405.1, OQV15764.1, OQV15765.1, OQV22038.1, OWA50667.1	XP_055337383.1	GAU91094.1
OG0001367	g15342.t1, g15342.t2, g15342.t3, g15342.t4	OQV18530.1, OQV18531.1, OQV18532.1	XP_055328934.1	GAU99028.1
OG0001368	g15347.t1	OQV18541.1, OQV18542.1, OQV18543.1	XP_055341400.1, XP_055341401.1, XP_055341402.1	GAU99600.1, GAU99601.1
OG0001369	g15475.t1	OQV14263.1	XP_055337641.1, XP_055337642.1, XP_055337643.1, XP_055337644.1, XP_055337645.1, XP_055337646.1	GAU92772.1
OG0001370	g96.t1	OQV14624.1, OQV14629.1, OQV14633.1, OQV14634.1, OQV14635.1	XP_055329043.1, XP_055329044.1	GAU99701.1
OG0001371	g856.t1	OQV17871.1	XP_055331193.1, XP_055331194.1, XP_055331195.1, XP_055331196.1, XP_055331197.1, XP_055331198.1	GAU99723.1
OG0001372	g919.t1, g919.t2	OQV24814.1	XP_055346382.1, XP_055346383.1, XP_055346384.1, XP_055346385.1	GAU97341.1, GAU97342.1
OG0001373	g1239.t1, g8621.t1, g8621.t2	OQV15761.1, OQV18816.1	XP_055349399.1, XP_055349400.1, XP_055349401.1	GAU87177.1
OG0001374	g1362.t1	OQV16702.1, OQV24655.1	XP_055337625.1	GAU92011.1, GAU92012.1, GAU92893.1, GAV01299.1, GAV01300.1
OG0001375	g1904.t1	OQV22925.1	XP_055330633.1, XP_055330634.1, XP_055330635.1, XP_055330636.1	GAV07185.1, GAV07186.1, GAV07187.1
OG0001376	g2706.t1	OWA52240.1	XP_055343988.1, XP_055343997.1	GAU90113.1, GAU90114.1, GAV09896.1, GAV09897.1, GAV09968.1
OG0001377	g13255.t1, g2860.t1	OQV14895.1, OWA55377.1	XP_055328600.1, XP_055328601.1, XP_055328602.1, XP_055328603.1	GAV09702.1
OG0001378	g3039.t1	OQV16625.1, OWA53733.1, OWA53737.1, OWA53739.1	XP_055346056.1	GAU95456.1, GAU95457.1, GAU97486.1
OG0001379	g3080.t1	OQV24446.1	XP_055330286.1, XP_055330294.1, XP_055330301.1, XP_055330311.1, XP_055330315.1, XP_055330324.1	GAU93993.1
OG0001380	g3162.t1		XP_055351850.1, XP_055351851.1, XP_055351852.1, XP_055351854.1, XP_055351855.1, XP_055351856.1, XP_055351857.1, XP_055351878.1
OG0001381	g3370.t1	OQV22218.1	XP_055335186.1, XP_055335194.1, XP_055335203.1, XP_055335210.1, XP_055335219.1	GAV05421.1, GAV05422.1
OG0001382	g3908.t1	OWA51700.1	XP_055334050.1, XP_055334056.1, XP_055334064.1, XP_055334078.1, XP_055334086.1	GAU98094.1, GAU98095.1
OG0001383	g3909.t1, g3909.t2	OWA51703.1, OWA51704.1	XP_055331549.1, XP_055331558.1, XP_055331577.1	GAU98090.1, GAU98091.1
OG0001384	g4160.t1	OQV20483.1, OWA55704.1	XP_055333472.1, XP_055333474.1, XP_055333475.1, XP_055333476.1, XP_055333477.1	GAU98579.1
OG0001385	g4164.t1	OQV25549.1	XP_055334082.1, XP_055356623.1, XP_055356624.1, XP_055356625.1, XP_055356626.1, XP_055356627.1	GAU91482.1
OG0001386	g4913.t1	OQV14821.1, OQV14822.1, OQV14823.1	XP_055329888.1, XP_055331369.1, XP_055331370.1, XP_055331371.1	GAU90975.1
OG0001387	g5007.t1	OQV23542.1	XP_055353071.1, XP_055353078.1, XP_055353085.1, XP_055353094.1, XP_055353102.1, XP_055353110.1	GAV05079.1
OG0001388	g5305.t1, g8047.t1, g8048.t1, g9941.t1	OQV15157.1, OQV17422.1, OQV25333.1	XP_055350706.1, XP_055354277.1
OG0001389	g6689.t1	OQV18118.1, OWA52220.1, OWA54200.1	XP_055340328.1, XP_055341707.1, XP_055341709.1	GAU96155.1, GAU99695.1
OG0001390	g7264.t1	OQV11791.1, OQV12942.1	XP_055328641.1, XP_055329085.1, XP_055329086.1, XP_055356868.1, XP_055356874.1	GAU98731.1
OG0001391	g7418.t1	OQV14403.1, OQV25244.1	XP_055351020.1, XP_055355690.1, XP_055355691.1	GAV03645.1, GAV03646.1, GAV08465.1
OG0001392	g7606.t1	OQV18466.1	XP_055349220.1, XP_055349221.1, XP_055349222.1, XP_055349223.1, XP_055349224.1, XP_055349225.1	GAU88379.1
OG0001393	g7612.t1	OWA53915.1, OWA53916.1, OWA53921.1	XP_055329026.1, XP_055329027.1, XP_055329028.1, XP_055329029.1	GAV02267.1
OG0001394	g7643.t1	OWA53448.1	XP_055335258.1, XP_055335259.1, XP_055335260.1, XP_055335261.1, XP_055335262.1, XP_055335263.1, XP_055335264.1
OG0001395	g7956.t1	OQV19304.1, OQV19305.1, OQV19306.1	XP_055336160.1, XP_055336161.1	GAV05521.1, GAV05522.1, GAV05523.1
OG0001396	g8762.t1, g8762.t2	OQV19918.1, OQV19919.1	XP_055354258.1, XP_055354259.1, XP_055354260.1, XP_055354261.1	GAU96489.1
OG0001397	g9292.t1	OQV14810.1	XP_055331652.1, XP_055331653.1, XP_055331654.1, XP_055331656.1, XP_055331657.1, XP_055331658.1	GAU89722.1
OG0001398	g9678.t1	OQV15235.1, OQV15236.1	XP_055333626.1, XP_055333635.1, XP_055333644.1, XP_055333653.1	GAU98375.1, GAU98376.1
OG0001399	g9870.t1	OQV18216.1, OQV18217.1	XP_055341730.1, XP_055346998.1, XP_055346999.1, XP_055347000.1, XP_055347001.1	GAU96047.1
OG0001400	g9882.t1	OQV14405.1, OQV14407.1, OQV14415.1, OWA51654.1	XP_055339498.1, XP_055339499.1	GAV05762.1, GAV05764.1
OG0001401	g10054.t1	OQV16062.1	XP_055327579.1, XP_055327581.1, XP_055327582.1, XP_055327583.1, XP_055327584.1	GAV08990.1, GAV08991.1
OG0001402	g10374.t1	OQV12355.1	XP_055343853.1, XP_055343854.1, XP_055343855.1, XP_055343856.1, XP_055343857.1	GAU94751.1, GAU94752.1
OG0001403	g10440.t1, g10644.t1	OWA50517.1, OWA50537.1	XP_055336672.1, XP_055336673.1, XP_055353429.1, XP_055353430.1	GAU88034.1
OG0001404	g11101.t1	OQV18854.1	XP_055341985.1, XP_055341986.1, XP_055341987.1, XP_055341988.1	GAU88992.1, GAU88993.1, GAU88994.1
OG0001405	g11528.t1, g11529.t1	OWA50432.1	XP_055327400.1	GAU87865.1, GAU95695.1, GAU95697.1, GAU95698.1, GAU95699.1
OG0001406	g11644.t1	OQV12587.1, OQV12589.1, OWA54323.1, OWA54936.1	XP_055340862.1, XP_055356629.1	GAU89004.1, GAU89009.1
OG0001407	g11783.t1	OQV13475.1, OQV25273.1	XP_055334745.1, XP_055334771.1	GAU88124.1, GAU88125.1, GAV09508.1, GAV09509.1
OG0001408	g12327.t1	OQV15073.1	XP_055332203.1, XP_055332204.1, XP_055332205.1, XP_055340928.1, XP_055340935.1, XP_055340944.1	GAU98394.1
OG0001409	g12589.t1	OQV18496.1	XP_055355997.1, XP_055355998.1, XP_055355999.1, XP_055356000.1, XP_055356001.1	GAV07550.1, GAV07551.1
OG0001410	g12836.t1, g12836.t2	OQV11846.1, OQV11847.1	XP_055357990.1, XP_055357991.1, XP_055357992.1, XP_055357993.1	GAU95259.1
OG0001411	g13659.t1	OQV13182.1	XP_055328459.1, XP_055328460.1, XP_055345553.1, XP_055348691.1, XP_055348692.1, XP_055348693.1	GAU98950.1
OG0001412	g13978.t1	OWA54140.1	XP_055332904.1, XP_055332907.1, XP_055342745.1, XP_055342954.1, XP_055351406.1, XP_055351407.1	GAU93299.1
OG0001413	g14792.t1, g14795.t1	OQV12014.1, OQV13076.1	XP_055351077.1, XP_055351078.1, XP_055351079.1, XP_055351080.1	GAU87180.1
OG0001414	g15593.t1	OWA53938.1		GAU92243.1, GAU92244.1, GAU97193.1, GAU97194.1, GAV07028.1, GAV07029.1, GAV07040.1
OG0001415	g1479.t1	OQV22120.1	XP_055337200.1, XP_055337201.1, XP_055337202.1, XP_055337203.1, XP_055337204.1	GAV05692.1, GAV05693.1
OG0001416	g1986.t1	OQV17840.1, OQV17841.1, OQV17842.1, OWA55436.1	XP_055334597.1, XP_055334605.1	GAU98183.1, GAU98184.1
OG0001417	g2406.t1	OQV18244.1	XP_055333402.1	GAU93564.1, GAV08743.1, GAV08744.1, GAV08745.1, GAV08746.1, GAV08747.1
OG0001418	g3133.t1	OQV13284.1, OWA51841.1	XP_055341090.1, XP_055356430.1, XP_055356431.1, XP_055356432.1	GAV01439.1, GAV01829.1
OG0001419		OQV11715.1, OQV11716.1, OQV11718.1	XP_055335386.1, XP_055335387.1, XP_055335389.1	GAU97800.1, GAU97801.1, GAU97802.1
OG0001420		OQV11968.1, OQV12418.1, OQV12896.1, OQV18246.1, OQV19984.1, OQV24803.1, OQV24804.1, OQV24805.1, OWA51872.1
OG0001421		OQV12580.1, OQV21887.1, OQV21888.1, OQV21894.1, OQV21895.1, OQV21992.1, OWA51460.1, OWA54322.1, OWA54847.1
OG0001422		OQV12730.1, OQV12731.1, OQV12733.1, OQV15284.1, OQV15285.1, OQV16807.1, OQV16808.1, OWA53282.1, OWA53283.1
OG0001423		OQV13423.1, OQV13424.1, OQV13425.1, OWA50707.1	XP_055344130.1, XP_055344135.1, XP_055353228.1	GAU88840.1, GAU88843.1
OG0001424		OQV13617.1, OQV17052.1, OQV17053.1, OQV19321.1, OQV24887.1, OQV24888.1, OWA55075.1, OWA55076.1	XP_055357624.1
OG0001425		OQV15985.1, OQV15988.1, OQV15989.1, OQV15990.1, OQV15991.1, OQV15993.1, OQV15994.1, OWA52505.1, OWA55182.1
OG0001426		OQV17946.1	XP_055336830.1, XP_055346477.1, XP_055346478.1	GAU90794.1, GAU90795.1, GAU90796.1, GAU90797.1, GAU99514.1
OG0001427		OQV18608.1, OQV18609.1, OQV18611.1, OQV18612.1, OQV18613.1, OWA55116.1, OWA55119.1, OWA55120.1, OWA55122.1
OG0001428		OQV20935.1, OQV20937.1	XP_055332849.1, XP_055332850.1, XP_055332852.1, XP_055332853.1, XP_055332854.1, XP_055332855.1	GAU91222.1
OG0001429		OQV22631.1, OQV26035.1, OWA52332.1, OWA52348.1, OWA52616.1, OWA53005.1, OWA53434.1, OWA53437.1, OWA54285.1
OG0001430		OQV22979.1, OQV22982.1, OQV22983.1, OQV22987.1, OQV25587.1, OQV25588.1, OQV26141.1, OWA51017.1, OWA54011.1
OG0001431		OQV24865.1	XP_055346389.1, XP_055346390.1	GAU91925.1, GAU91926.1, GAU91927.1, GAV09340.1, GAV09341.1, GAV09342.1
OG0001432		OQV26197.1	XP_055349850.1, XP_055349851.1, XP_055349852.1, XP_055349853.1, XP_055349854.1, XP_055349855.1, XP_055349856.1	GAU92515.1
OG0001433		OQV26246.1, OQV26247.1, OQV26249.1	XP_055350136.1, XP_055350137.1, XP_055350138.1, XP_055350170.1	GAV00705.1, GAV03881.1
OG0001434		OWA50268.1	XP_055336508.1, XP_055336509.1, XP_055336510.1, XP_055336511.1, XP_055336512.1, XP_055345518.1	GAV03298.1, GAV03299.1
OG0001435		OWA51255.1, OWA51256.1, OWA51257.1, OWA51258.1, OWA51259.1, OWA51260.1, OWA54644.1, OWA54701.1, OWA55653.1
OG0001436			XP_055328964.1, XP_055348351.1, XP_055348352.1, XP_055348372.1, XP_055348373.1, XP_055348374.1, XP_055348375.1, XP_055348395.1, XP_055348412.1
OG0001437			XP_055329204.1, XP_055329205.1, XP_055346052.1, XP_055346053.1, XP_055346116.1, XP_055346200.1, XP_055346201.1, XP_055346202.1, XP_055346220.1
OG0001438			XP_055329492.1, XP_055329493.1, XP_055329494.1, XP_055329495.1, XP_055329496.1, XP_055329497.1, XP_055329498.1, XP_055329499.1, XP_055329500.1
OG0001439			XP_055329862.1, XP_055341172.1, XP_055343089.1, XP_055346548.1, XP_055354763.1, XP_055357367.1, XP_055357368.1, XP_055357369.1, XP_055357370.1
OG0001440			XP_055329886.1, XP_055339983.1, XP_055343202.1, XP_055343203.1, XP_055343204.1, XP_055343205.1, XP_055343214.1, XP_055343256.1, XP_055347421.1
OG0001441			XP_055330438.1, XP_055340873.1, XP_055340877.1, XP_055349104.1, XP_055349105.1, XP_055349106.1, XP_055349107.1, XP_055349137.1, XP_055349138.1
OG0001442			XP_055330506.1, XP_055336568.1, XP_055340987.1, XP_055342553.1, XP_055342554.1, XP_055342555.1, XP_055344927.1, XP_055345378.1, XP_055351711.1
OG0001443			XP_055330557.1, XP_055336101.1, XP_055336102.1, XP_055336103.1, XP_055336104.1, XP_055336249.1, XP_055353155.1, XP_055355254.1, XP_055357209.1
OG0001444			XP_055330789.1, XP_055336831.1, XP_055336832.1, XP_055337463.1, XP_055337464.1, XP_055340244.1, XP_055353874.1, XP_055357051.1	GAV05263.1
OG0001445			XP_055331229.1, XP_055344681.1, XP_055344682.1, XP_055344684.1, XP_055344685.1, XP_055344686.1, XP_055344688.1, XP_055347139.1, XP_055347965.1
OG0001446			XP_055331686.1, XP_055331694.1, XP_055331703.1, XP_055331712.1, XP_055331721.1, XP_055331729.1	GAU92732.1, GAU92733.1, GAU92734.1
OG0001447			XP_055332245.1, XP_055332246.1, XP_055332247.1, XP_055339258.1, XP_055339301.1, XP_055339310.1, XP_055347678.1, XP_055347716.1, XP_055349099.1
OG0001448			XP_055332357.1, XP_055332365.1, XP_055332372.1, XP_055332380.1, XP_055332388.1, XP_055332395.1, XP_055332403.1, XP_055332410.1, XP_055332418.1
OG0001449			XP_055332540.1, XP_055332545.1, XP_055349913.1, XP_055349915.1, XP_055349916.1, XP_055349928.1, XP_055349937.1, XP_055349938.1, XP_055349970.1
OG0001450			XP_055332760.1, XP_055332761.1, XP_055332762.1, XP_055348194.1, XP_055348244.1, XP_055348245.1, XP_055348246.1, XP_055348248.1, XP_055356856.1
OG0001451			XP_055333369.1, XP_055333370.1, XP_055352920.1, XP_055352922.1, XP_055352923.1, XP_055357809.1, XP_055357815.1, XP_055357816.1, XP_055357817.1
OG0001452			XP_055333899.1, XP_055335827.1, XP_055335828.1, XP_055335829.1, XP_055345059.1, XP_055345060.1, XP_055345068.1, XP_055349879.1, XP_055355706.1
OG0001453			XP_055334892.1, XP_055334898.1, XP_055343889.1, XP_055343897.1, XP_055345870.1, XP_055345882.1, XP_055352585.1, XP_055352590.1, XP_055352611.1
OG0001454			XP_055335028.1, XP_055335029.1, XP_055345079.1, XP_055351046.1, XP_055351888.1, XP_055351889.1, XP_055351890.1, XP_055352289.1, XP_055355806.1
OG0001455			XP_055335930.1, XP_055347950.1, XP_055347970.1, XP_055348024.1, XP_055348025.1, XP_055356111.1, XP_055356112.1, XP_055356113.1, XP_055356114.1
OG0001456			XP_055336547.1, XP_055336777.1, XP_055350042.1, XP_055351788.1, XP_055351789.1, XP_055351790.1, XP_055351791.1, XP_055351793.1, XP_055351794.1
OG0001457			XP_055337234.1, XP_055337235.1, XP_055337236.1, XP_055337237.1, XP_055337238.1, XP_055337239.1, XP_055337241.1, XP_055337242.1	GAU99513.1
OG0001458			XP_055337918.1, XP_055337919.1, XP_055337938.1, XP_055337943.1, XP_055337958.1, XP_055337961.1, XP_055337962.1, XP_055337984.1, XP_055337985.1
OG0001459			XP_055338455.1, XP_055338456.1, XP_055338457.1, XP_055338506.1, XP_055338507.1, XP_055338508.1, XP_055338509.1, XP_055338510.1, XP_055338511.1
OG0001460			XP_055341516.1, XP_055341517.1, XP_055341518.1, XP_055341519.1, XP_055341520.1, XP_055341521.1, XP_055341522.1, XP_055341523.1, XP_055341524.1
OG0001461			XP_055342104.1, XP_055342105.1, XP_055346928.1, XP_055346942.1, XP_055346943.1, XP_055346944.1, XP_055346945.1, XP_055346946.1, XP_055346947.1
OG0001462			XP_055342635.1, XP_055342636.1, XP_055342640.1, XP_055342644.1, XP_055342645.1, XP_055342648.1, XP_055342649.1, XP_055347603.1, XP_055347604.1
OG0001463			XP_055343401.1, XP_055343691.1, XP_055343930.1, XP_055348909.1, XP_055348911.1, XP_055348912.1, XP_055348913.1, XP_055348914.1, XP_055355907.1
OG0001464			XP_055344278.1, XP_055344286.1, XP_055344294.1, XP_055344302.1	GAU89505.1, GAU89615.1, GAV00531.1, GAV01584.1, GAV01585.1
OG0001465			XP_055345266.1, XP_055347574.1, XP_055347575.1, XP_055347576.1, XP_055347577.1, XP_055347578.1, XP_055347579.1, XP_055347580.1, XP_055347581.1
OG0001466			XP_055346977.1, XP_055346978.1, XP_055346980.1, XP_055346981.1, XP_055346982.1, XP_055346983.1, XP_055346984.1, XP_055346985.1, XP_055346986.1
OG0001467			XP_055348195.1, XP_055348204.1, XP_055348210.1, XP_055348218.1, XP_055348224.1, XP_055348231.1, XP_055348239.1, XP_055348247.1, XP_055348255.1
OG0001468			XP_055348676.1, XP_055348677.1, XP_055348678.1, XP_055348679.1, XP_055348680.1, XP_055348682.1, XP_055348683.1, XP_055348684.1, XP_055348685.1
OG0001469			XP_055351081.1, XP_055351082.1, XP_055351083.1, XP_055355414.1, XP_055355415.1, XP_055355416.1, XP_055355418.1, XP_055355419.1, XP_055355420.1
OG0001470			XP_055351216.1, XP_055351217.1, XP_055351221.1, XP_055351222.1, XP_055351223.1, XP_055351265.1, XP_055351266.1, XP_055351267.1, XP_055351268.1
OG0001471			XP_055354880.1, XP_055354881.1, XP_055354883.1, XP_055354884.1, XP_055354885.1, XP_055354892.1, XP_055354894.1, XP_055354896.1, XP_055355984.1
OG0001472				GAU87220.1, GAU89216.1, GAU89217.1, GAU89297.1, GAU89298.1, GAU89816.1, GAU89857.1, GAV01389.1, GAV01391.1
OG0001473				GAU87719.1, GAU94211.1, GAU94212.1, GAU99643.1, GAU99649.1, GAV02483.1, GAV05041.1, GAV05058.1, GAV07896.1
OG0001474				GAU89081.1, GAU90445.1, GAU90478.1, GAU90482.1, GAU90508.1, GAU92234.1, GAU96588.1, GAV02896.1, GAV09106.1
OG0001475				GAU89364.1, GAU91562.1, GAU93309.1, GAV02894.1, GAV06325.1, GAV06658.1, GAV06835.1, GAV08732.1, GAV09475.1
OG0001476				GAU91934.1, GAU91935.1, GAU94511.1, GAU94512.1, GAV00731.1, GAV03754.1, GAV03755.1, GAV03756.1, GAV03770.1
OG0001477				GAV00776.1, GAV00833.1, GAV00834.1, GAV00837.1, GAV00838.1, GAV00839.1, GAV00842.1, GAV08411.1, GAV08463.1
OG0001478				GAV01414.1, GAV01415.1, GAV01416.1, GAV01417.1, GAV01421.1, GAV01422.1, GAV01425.1, GAV01426.1, GAV01437.1
OG0001479	g1464.t1, g1604.t1	OQV19961.1	XP_055337298.1, XP_055337351.1, XP_055348363.1	GAV08901.1, GAV08902.1
OG0001480	g13095.t1, g1430.t1, g14378.t1, g15153.t1, g702.t1	OWA52773.1	XP_055350567.1	GAU95926.1
OG0001481	g7381.t1	OQV11585.1, OQV11605.1, OQV11608.1, OQV20561.1, OQV22973.1	XP_055356168.1	GAV00238.1
OG0001482	g11690.t1, g1296.t1	OQV13207.1, OQV14357.1, OWA51102.1	XP_055343020.1, XP_055356023.1	GAV01108.1
OG0001483	g10393.t1, g3242.t1, g7393.t1, g7714.t1, g7885.t1, g7886.t1, g8603.t1	OQV11560.1
OG0001484	g5512.t1, g8402.t1	OQV15998.1, OQV24067.1	XP_055328151.1, XP_055328152.1, XP_055332353.1, XP_055332354.1
OG0001485	g534.t1, g535.t1, g536.t1, g6684.t1, g6994.t1, g9421.t1, g9876.t1		XP_055350274.1
OG0001486	g10223.t1, g12281.t1, g12713.t1, g3443.t1, g9325.t1, g9905.t1		XP_055333534.1, XP_055339073.1
OG0001487		OQV11979.1, OQV12446.1, OQV14917.1, OQV24197.1, OWA52414.1, OWA53496.1, OWA53525.1, OWA53843.1
OG0001488	g15383.t1	OQV13928.1, OQV14864.1, OQV19316.1, OWA50418.1, OWA54443.1, OWA54725.1	XP_055329887.1
OG0001489			XP_055337285.1, XP_055337286.1, XP_055337309.1, XP_055337318.1, XP_055340463.1, XP_055340464.1, XP_055351594.1, XP_055354056.1
OG0001490	g11618.t1, g11618.t2, g11628.t1, g13876.t1, g13877.t1, g2128.t1, g2128.t2	OWA54315.1
OG0001491	g7900.t1	OQV15805.1, OWA54059.1, OWA54060.1, OWA54501.1		GAU89273.1, GAU89274.1, GAU94547.1
OG0001492		OQV13767.1, OQV14193.1, OQV14209.1, OQV14210.1, OWA54415.1, OWA54917.1, OWA54956.1, OWA54957.1
OG0001493	g2079.t1, g2123.t1, g4791.t1, g4792.t1, g6760.t1	OQV16168.1	XP_055344473.1	GAV01534.1
OG0001494	g2875.t1, g7796.t1, g7797.t1, g7800.t1, g7801.t1, g7802.t1	OQV26155.1, OWA53985.1
OG0001495	g12644.t1	OWA51529.1	XP_055344220.1, XP_055344244.1, XP_055344323.1, XP_055344324.1, XP_055344871.1, XP_055344941.1
OG0001496	g11124.t1, g11598.t1, g11605.t1, g11612.t1, g11619.t1, g12662.t1, g3209.t1, g8361.t1
OG0001497	g11907.t1, g13302.t1, g13874.t1, g15562.t1, g3074.t1, g879.t1, g9976.t1			GAV01488.1
OG0001498	g11825.t1, g1314.t1, g14900.t1, g173.t1	OQV14887.1	XP_055327807.1, XP_055327808.1	GAU89411.1
OG0001499	g13146.t1	OQV26237.1	XP_055340650.1, XP_055340651.1, XP_055340675.1, XP_055340677.1	GAU98737.1, GAU98738.1
OG0001500	g12690.t1, g6843.t1		XP_055332991.1, XP_055353622.1, XP_055353626.1	GAU91326.1, GAU91327.1, GAU91328.1
OG0001501	g8099.t1, g9984.t1	OQV17629.1, OWA50113.1	XP_055329434.1, XP_055356711.1	GAU99710.1, GAV09080.1
OG0001502	g10045.t1	OQV16008.1, OQV16009.1, OWA54186.1, OWA54187.1	XP_055329248.1, XP_055347180.1	GAV02256.1
OG0001503	g13127.t1	OQV16681.1, OQV24126.1, OQV24278.1, OWA50748.1	XP_055329650.1, XP_055329655.1	GAV04321.1
OG0001504	g6005.t1	OQV12509.1, OQV12510.1	XP_055346138.1, XP_055347706.1	GAU95596.1, GAU95597.1, GAU95598.1
OG0001505	g11573.t1, g762.t1	OQV15770.1, OQV24597.1, OWA50061.1	XP_055343684.1	GAV01862.1, GAV01863.1
OG0001506	g10325.t1	OQV16695.1, OQV16696.1	XP_055337736.1, XP_055337737.1	GAU92884.1, GAU92885.1, GAU92886.1
OG0001507	g151.t1, g9917.t1	OQV18112.1	XP_055335097.1, XP_055335105.1, XP_055335114.1, XP_055335122.1	GAU98346.1
OG0001508	g4112.t1	OQV18402.1, OWA53055.1	XP_055336148.1, XP_055346749.1	GAV03494.1, GAV03495.1, GAV08994.1
OG0001509	g4071.t1, g5269.t1, g7288.t1, g7288.t2	OQV12142.1	XP_055349583.1, XP_055349584.1	GAU99255.1
OG0001510	g15020.t1, g15031.t1, g15038.t1, g1832.t1, g3568.t1		XP_055332254.1	GAU96698.1, GAU97319.1
OG0001511	g7759.t1	OQV23186.1	XP_055338102.1, XP_055338103.1, XP_055338104.1	GAU93641.1, GAU93642.1, GAU93643.1
OG0001512	g12830.t1, g13722.t1	OQV13899.1, OWA50803.1, OWA51670.1, OWA51678.1, OWA51972.1	XP_055327337.1
OG0001513	g15236.t1, g8967.t1	OQV13921.1	XP_055341337.1, XP_055341338.1, XP_055341339.1, XP_055341340.1	GAU96128.1
OG0001514	g11530.t1, g11567.t1, g15150.t1, g15150.t2, g3119.t1		XP_055329648.1, XP_055329649.1, XP_055336299.1
OG0001515	g14121.t1	OQV11742.1	XP_055342202.1, XP_055342203.1, XP_055342204.1	GAU92655.1, GAU93844.1, GAU93845.1
OG0001516	g1958.t1, g9377.t1	OQV13925.1, OQV22369.1	XP_055335822.1	GAV01858.1, GAV05212.1, GAV05213.1
OG0001517	g1647.t1, g1648.t1, g1649.t1	OQV21036.1	XP_055332785.1, XP_055332786.1	GAU91345.1, GAU91346.1
OG0001518	g9073.t1	OQV19654.1, OQV23722.1, OQV25421.1	XP_055342485.1, XP_055346655.1	GAU90826.1, GAV02046.1
OG0001519	g3530.t1, g439.t1	OQV17044.1	XP_055347728.1, XP_055347772.1, XP_055353552.1	GAU99506.1, GAV02261.1
OG0001520	g10502.t1, g10900.t1, g3446.t1, g524.t1	OQV13575.1, OQV19861.1, OWA52882.1, OWA52884.1
OG0001521	g12398.t1, g295.t1, g5738.t1, g5740.t1	OQV15047.1, OQV15062.1, OWA50960.1, OWA55587.1
OG0001522	g14701.t1, g2943.t1	OQV12779.1	XP_055330378.1, XP_055330379.1, XP_055353100.1, XP_055353101.1	GAU99118.1
OG0001523			XP_055339804.1, XP_055339813.1, XP_055339823.1, XP_055339832.1, XP_055339841.1, XP_055339850.1, XP_055339859.1, XP_055339867.1
OG0001524	g3034.t1, g3630.t1	OQV25932.1	XP_055350663.1, XP_055350664.1, XP_055350673.1	GAV02968.1, GAV02969.1
OG0001525	g1623.t1	OQV24810.1	XP_055350012.1, XP_055350531.1, XP_055350659.1, XP_055351829.1	GAV02019.1, GAV02020.1
OG0001526	g5372.t1, g5372.t2, g5372.t3	OQV13907.1, OQV21686.1	XP_055348611.1, XP_055348612.1	GAV08912.1
OG0001527	g4433.t1	OQV12081.1, OQV12381.1	XP_055338957.1, XP_055353253.1, XP_055353254.1, XP_055353255.1	GAU96409.1
OG0001528	g10710.t1	OQV21283.1, OQV21297.1	XP_055331287.1, XP_055331288.1	GAU87466.1, GAU87468.1, GAU94835.1
OG0001529	g5592.t1	OWA50021.1	XP_055334504.1, XP_055334505.1, XP_055334507.1, XP_055334508.1, XP_055334509.1	GAU87129.1
OG0001530	g15711.t1	OQV22382.1, OWA54236.1	XP_055340016.1, XP_055346862.1, XP_055346863.1	GAV07524.1, GAV07535.1
OG0001531	g11010.t1, g2857.t1, g3217.t1	OQV20507.1	XP_055334029.1	GAV07925.1, GAV07926.1, GAV07927.1
OG0001532	g5993.t1	OQV23753.1, OQV23754.1, OQV24678.1	XP_055337017.1, XP_055337019.1	GAU99850.1, GAU99851.1
OG0001533	g12233.t1, g12234.t1, g1354.t1	OWA52042.1	XP_055328438.1, XP_055328528.1	GAV09020.1, GAV09021.1
OG0001534	g11393.t1, g11393.t2	OQV16277.1	XP_055334227.1, XP_055334234.1, XP_055334241.1	GAV03569.1, GAV03570.1
OG0001535	g13184.t1	OQV17308.1, OQV25720.1	XP_055338775.1, XP_055338776.1, XP_055338777.1, XP_055338778.1	GAU89972.1
OG0001536	g12676.t1		XP_055331978.1, XP_055331979.1, XP_055331980.1, XP_055331981.1, XP_055331982.1, XP_055331983.1, XP_055331985.1
OG0001537	g13334.t1	OWA51219.1	XP_055327293.1, XP_055327294.1, XP_055327296.1, XP_055327297.1, XP_055327298.1	GAU94390.1
OG0001538	g15196.t1	OQV11698.1, OQV25679.1, OQV25681.1	XP_055345004.1, XP_055345005.1	GAU99868.1, GAU99869.1
OG0001539	g5733.t1	OQV19541.1	XP_055329359.1, XP_055346318.1	GAU97157.1, GAU97159.1, GAU97160.1, GAU97161.1
OG0001540	g13712.t1, g2636.t1, g2637.t1, g2832.t1, g8623.t1	OQV20161.1	XP_055329339.1	GAV02347.1
OG0001541	g14614.t1		XP_055333863.1, XP_055333864.1, XP_055349990.1, XP_055352556.1, XP_055354737.1, XP_055354982.1, XP_055354983.1
OG0001542	g1646.t1	OQV17449.1, OWA54137.1, OWA54138.1	XP_055332128.1, XP_055332129.1	GAU93872.1, GAV03346.1
OG0001543	g7568.t1	OWA50070.1	XP_055329341.1, XP_055329350.1, XP_055329361.1	GAV05483.1, GAV05484.1, GAV05485.1
OG0001544	g14619.t1, g5864.t1	OWA52658.1, OWA52659.1, OWA52660.1, OWA52661.1	XP_055337172.1	GAU99581.1
OG0001545	g1520.t1, g15669.t1, g1579.t1, g5645.t1, g5648.t1, g6033.t1, g7010.t1, g8303.t1
OG0001546	g13240.t1, g1521.t1, g2004.t1, g7011.t1, g8552.t1		XP_055336578.1, XP_055347884.1, XP_055354238.1
OG0001547	g11501.t1, g11503.t1, g14439.t1, g14808.t1, g2724.t1, g4575.t1, g4784.t1, g8027.t1
OG0001548	g12653.t1, g14477.t1, g8420.t1, g9904.t1	OWA54431.1	XP_055355497.1	GAV04625.1, GAV04626.1
OG0001549	g11739.t1, g13364.t1, g14918.t1, g2726.t1, g3785.t1, g5245.t1, g7125.t1, g9619.t1
OG0001550	g3551.t1, g9424.t1	OWA51636.1, OWA51637.1	XP_055352729.1, XP_055352761.1, XP_055352762.1	GAV01128.1
OG0001551	g1251.t1, g2501.t1, g2865.t1, g3180.t1, g3181.t1, g6492.t1, g9271.t1, g9425.t1
OG0001552	g12149.t1, g695.t1, g696.t1	OQV24412.1	XP_055353715.1, XP_055353716.1, XP_055353717.1	GAU93362.1
OG0001553	g14850.t1, g15747.t1, g2278.t1, g2279.t1, g5077.t1		XP_055340595.1, XP_055340603.1	GAU89911.1
OG0001554	g3243.t1, g6477.t1	OQV21924.1	XP_055341546.1, XP_055341547.1, XP_055353202.1	GAU96114.1, GAU96115.1
OG0001555	g11140.t1, g11141.t1, g3886.t1, g4944.t1, g5281.t1, g7124.t1, g8060.t1, g9313.t1
OG0001556	g123.t1, g1725.t1, g4867.t1	OQV17641.1, OQV18636.1	XP_055328414.1, XP_055328415.1	GAV09470.1
OG0001557	g13076.t1, g13440.t1, g3598.t1, g5225.t1, g6291.t1, g6297.t1, g6297.t2, g6298.t1
OG0001558	g11128.t1, g14095.t1, g14096.t1, g3509.t1, g3511.t1, g515.t1, g5891.t1, g9326.t1
OG0001559	g10740.t1, g10740.t2, g13621.t1	OQV21236.1	XP_055331331.1, XP_055331332.1, XP_055331333.1	GAU87585.1
OG0001560	g10141.t1, g10141.t2, g3577.t1	OQV16944.1, OQV16945.1	XP_055328224.1	GAV09514.1, GAV09515.1
OG0001561	g11817.t1			GAU87324.1, GAU87327.1, GAU87328.1, GAU87341.1, GAV08217.1, GAV08714.1, GAV08715.1
OG0001562	g11830.t1, g12020.t1, g8852.t1, g8852.t2	OQV19546.1, OQV25082.1	XP_055327410.1	GAV06643.1
OG0001563	g5822.t1, g8417.t1	OQV23037.1, OQV23038.1	XP_055338399.1, XP_055338400.1	GAU90210.1, GAU96740.1
OG0001564	g13020.t1, g13569.t1, g14052.t1, g463.t1, g5050.t1, g6029.t1, g6029.t2, g7413.t1
OG0001565	g10901.t1, g15099.t1, g4011.t1	OQV19677.1, OQV19678.1, OQV19689.1, OQV20051.1, OWA53984.1
OG0001566	g4421.t1, g4421.t2, g4421.t3	OQV15703.1	XP_055343290.1, XP_055343292.1, XP_055343293.1	GAV00975.1
OG0001567	g4460.t1	OQV25682.1	XP_055339045.1, XP_055339046.1	GAV07477.1, GAV07478.1, GAV07479.1, GAV07510.1
OG0001568	g4488.t1	OQV16556.1, OWA50514.1	XP_055327885.1, XP_055327886.1, XP_055327887.1, XP_055327889.1	GAV03444.1
OG0001569	g4518.t1	OQV12631.1, OQV12632.1	XP_055329625.1, XP_055329633.1, XP_055329642.1, XP_055329651.1	GAU98221.1
OG0001570	g7079.t1	OQV12238.1	XP_055335441.1, XP_055335442.1, XP_055335443.1, XP_055335444.1, XP_055335445.1	GAU97873.1
OG0001571	g7080.t1	OQV12237.1	XP_055335402.1, XP_055335403.1, XP_055335404.1, XP_055335405.1, XP_055336816.1	GAU97874.1
OG0001572	g7090.t1	OQV11998.1	XP_055335321.1, XP_055335322.1, XP_055356927.1, XP_055356928.1	GAU97836.1, GAU97837.1
OG0001573	g7154.t1	OQV19405.1	XP_055334315.1, XP_055334323.1, XP_055334331.1, XP_055334339.1, XP_055334345.1	GAU97974.1
OG0001574	g7161.t1	OQV19396.1	XP_055337503.1, XP_055337512.1, XP_055337520.1, XP_055337530.1, XP_055337539.1	GAU97982.1
OG0001575	g11801.t1, g1524.t1, g1525.t1, g315.t1, g9143.t1	OQV18201.1	XP_055341678.1	GAU96063.1
OG0001576	g9224.t1	OQV24488.1	XP_055332975.1, XP_055332976.1, XP_055332977.1, XP_055332979.1, XP_055332980.1	GAU94042.1
OG0001577	g9234.t1	OQV24505.1	XP_055332832.1, XP_055332833.1, XP_055332834.1, XP_055332835.1, XP_055332836.1	GAU94062.1
OG0001578	g10820.t1, g3471.t1	OQV23233.1	XP_055338212.1, XP_055338213.1, XP_055338215.1, XP_055338216.1	GAV06467.1
OG0001579	g10846.t1	OWA50765.1	XP_055352539.1, XP_055352546.1, XP_055352554.1, XP_055352562.1, XP_055352566.1	GAU90090.1
OG0001580	g10860.t1	OQV18820.1	XP_055348436.1, XP_055348437.1, XP_055348438.1, XP_055348439.1, XP_055357437.1	GAU87739.1
OG0001581	g12109.t1	OQV24274.1	XP_055338338.1, XP_055338339.1, XP_055338340.1	GAU93422.1, GAU93423.1, GAU93424.1
OG0001582	g12121.t1	OQV24256.1	XP_055338114.1, XP_055338161.1, XP_055338162.1, XP_055338163.1	GAU93398.1, GAU93399.1
OG0001583	g12122.t1, g12122.t2, g8970.t1	OQV16307.1, OQV24252.1	XP_055338304.1, XP_055353798.1	GAU93394.1
OG0001584	g12126.t1	OQV24245.1, OQV24246.1	XP_055338060.1, XP_055338061.1, XP_055353757.1, XP_055353758.1	GAU93387.1
OG0001585	g12134.t1	OQV24239.1, OQV24240.1	XP_055353711.1, XP_055353712.1, XP_055353713.1	GAU93375.1, GAU93376.1
OG0001586	g12135.t1	OQV24234.1	XP_055353783.1, XP_055353784.1, XP_055353785.1, XP_055353786.1, XP_055353787.1	GAU93373.1
OG0001587	g12167.t1	OQV14243.1	XP_055331272.1, XP_055331273.1, XP_055331274.1, XP_055331275.1, XP_055331276.1	GAU91006.1
OG0001588	g12173.t1	OWA50569.1	XP_055351722.1, XP_055351723.1, XP_055351724.1, XP_055351727.1	GAV02685.1, GAV02723.1
OG0001589	g12177.t1		XP_055353699.1, XP_055353701.1, XP_055353702.1, XP_055353703.1, XP_055353704.1, XP_055353705.1	GAU93346.1
OG0001590	g13188.t1	OQV12515.1	XP_055331497.1, XP_055336870.1, XP_055351519.1	GAU91964.1, GAU92387.1, GAU94150.1
OG0001591	g13198.t1	OWA53355.1	XP_055328713.1, XP_055328714.1, XP_055328715.1, XP_055328717.1, XP_055328718.1	GAU98921.1
OG0001592	g13215.t3	OQV17581.1	XP_055338941.1, XP_055338942.1	GAU88646.1, GAU88647.1, GAU88648.1, GAU88649.1
OG0001593	g13217.t1, g1692.t1	OQV15720.1, OQV16719.1, OQV16720.1	XP_055357769.1	GAU92107.1, GAU92109.1
OG0001594	g13229.t1, g13229.t2, g13229.t3, g15599.t1, g5488.t1	OQV19129.1	XP_055344870.1	GAU98809.1
OG0001595	g10354.t1, g10354.t2, g13252.t1	OQV12514.1	XP_055344564.1, XP_055344577.1, XP_055344578.1	GAU89375.1
OG0001596	g15815.t1	OQV18049.1	XP_055337222.1, XP_055337230.1, XP_055337240.1, XP_055337248.1, XP_055337257.1	GAU98274.1
OG0001597	g15840.t1	OQV12640.1	XP_055338589.1, XP_055341658.1, XP_055341667.1, XP_055341674.1	GAU93644.1, GAU98225.1
OG0001598	g1682.t1	OQV17226.1	XP_055332655.1, XP_055332656.1, XP_055332657.1	GAV09008.1, GAV09009.1, GAV09010.1
OG0001599	g1695.t1, g1695.t2	OQV24631.1	XP_055333118.1, XP_055333119.1, XP_055333120.1, XP_055333121.1	GAU94193.1
OG0001600	g1954.t1, g1955.t1, g2539.t1, g9912.t1	OQV11681.1	XP_055344611.1, XP_055353799.1	GAU92089.1
OG0001601	g2925.t1, g2925.t2	OQV23619.1, OQV23620.1, OQV23621.1	XP_055337185.1	GAU99874.1, GAU99875.1
OG0001602	g3284.t1	OQV20549.1	XP_055343560.1, XP_055343561.1, XP_055343562.1, XP_055343563.1, XP_055343564.1	GAV00141.1
OG0001603	g3295.t1	OQV17134.1	XP_055339842.1, XP_055339843.1, XP_055339844.1, XP_055339845.1, XP_055339846.1	GAU98696.1
OG0001604	g3325.t1	OQV14123.1, OQV14124.1	XP_055340012.1, XP_055340013.1, XP_055340014.1, XP_055340015.1	GAU98646.1
OG0001605	g3344.t1	OQV19347.1, OQV19348.1, OWA50020.1	XP_055334591.1	GAU87202.1, GAU87203.1, GAU95642.1
OG0001606	g4372.t1	OQV21536.1	XP_055334787.1, XP_055334788.1, XP_055334789.1, XP_055334790.1, XP_055334791.1	GAU88182.1
OG0001607	g4830.t1	OQV13365.1, OQV13366.1	XP_055330859.1, XP_055330860.1, XP_055330861.1, XP_055330862.1	GAU88536.1
OG0001608	g4840.t1, g4840.t2	OWA50086.1	XP_055342321.1, XP_055342344.1	GAV05502.1, GAV05503.1, GAV05504.1
OG0001609	g5075.t1, g5075.t2	OQV25208.1	XP_055328063.1, XP_055328064.1, XP_055328065.1	GAV04116.1, GAV04117.1
OG0001610	g5081.t1	OWA50205.1	XP_055328226.1, XP_055328227.1	GAV04104.1, GAV04105.1, GAV04108.1, GAV04109.1
OG0001611	g5564.t1, g5564.t2	OQV16630.1, OQV26084.1	XP_055334479.1	GAU94490.1, GAU94491.1, GAU94492.1
OG0001612	g5570.t1	OWA53475.1	XP_055334452.1, XP_055334453.1, XP_055334454.1, XP_055334455.1, XP_055334456.1	GAU87494.1
OG0001613	g12077.t1, g5608.t1	OQV13803.1, OQV14220.1	XP_055341716.1	GAU88531.1, GAU88532.1, GAU94014.1
OG0001614	g5636.t1	OQV22249.1	XP_055334798.1, XP_055334799.1	GAU87394.1, GAU87395.1, GAU87396.1, GAU87397.1
OG0001615	g15598.t1, g5831.t1	OQV16116.1, OQV16117.1	XP_055337228.1, XP_055346137.1, XP_055346139.1	GAV08318.1
OG0001616	g5859.t1	OQV16817.1	XP_055337389.1, XP_055337390.1, XP_055337391.1, XP_055337392.1, XP_055337393.1	GAV02132.1
OG0001617	g7055.t1	OQV12753.1	XP_055345729.1, XP_055345730.1, XP_055345731.1, XP_055345732.1, XP_055345733.1	GAV03314.1
OG0001618	g7057.t1	OWA51930.1	XP_055344153.1, XP_055344154.1, XP_055344155.1, XP_055344156.1, XP_055344157.1	GAU99948.1
OG0001619	g7777.t1, g7777.t2	OQV17008.1, OQV23156.1	XP_055353324.1, XP_055353325.1	GAU93669.1, GAU93670.1
OG0001620	g7968.t1, g7968.t2	OQV25045.1	XP_055351351.1, XP_055351352.1, XP_055351353.1, XP_055351354.1	GAU92958.1
OG0001621	g7991.t1	OQV19933.1, OQV21798.1, OQV21800.1	XP_055328613.1, XP_055336663.1	GAU95568.1, GAV03680.1
OG0001622	g8007.t1	OQV18755.1, OQV18756.1	XP_055357134.1, XP_055357135.1, XP_055357137.1	GAV00507.1, GAV00508.1
OG0001623	g8023.t1	OQV24042.1	XP_055333549.1, XP_055333630.1, XP_055333631.1, XP_055333632.1, XP_055333633.1	GAU90620.1
OG0001624	g8124.t1, g8124.t2	OQV18731.1	XP_055332267.1, XP_055332268.1, XP_055332269.1	GAV00455.1, GAV00456.1
OG0001625	g1063.t1, g1064.t1, g4345.t1, g4346.t1, g8154.t1	OQV15527.1	XP_055347938.1	GAV07287.1
OG0001626	g8161.t1, g8161.t2	OQV15487.1	XP_055355003.1, XP_055355004.1, XP_055355005.1, XP_055357152.1	GAV07720.1
OG0001627	g8521.t1	OQV19250.1	XP_055337925.1, XP_055337933.1, XP_055337941.1	GAV05186.1, GAV05187.1, GAV05188.1
OG0001628	g8526.t1	OQV19286.1	XP_055342875.1, XP_055342882.1, XP_055342891.1, XP_055342900.1, XP_055342908.1	GAV08936.1
OG0001629	g8896.t1	OQV24313.1	XP_055338323.1, XP_055338325.1, XP_055338326.1, XP_055338327.1, XP_055338328.1	GAU93473.1
OG0001630	g9732.t1	OQV14486.1	XP_055357272.1, XP_055357279.1, XP_055357286.1	GAV04840.1, GAV04841.1, GAV05152.1
OG0001631	g9745.t1	OQV11408.1	XP_055349369.1, XP_055349377.1, XP_055349385.1, XP_055349394.1	GAU96703.1, GAU96704.1
OG0001632	g9755.t1	OWA53103.1	XP_055348473.1	GAU96679.1, GAU96680.1, GAU96992.1, GAV08762.1, GAV08763.1
OG0001633	g10178.t1	OQV23965.1, OQV23966.1	XP_055342710.1, XP_055342711.1	GAU93333.1, GAU93334.1, GAU93335.1
OG0001634	g10208.t1	OQV22418.1	XP_055335298.1, XP_055335299.1, XP_055335300.1, XP_055335301.1, XP_055335302.1	GAU97576.1
OG0001635	g10618.t1	OQV18211.1	XP_055341630.1, XP_055341632.1, XP_055341633.1, XP_055341634.1, XP_055341635.1	GAU96052.1
OG0001636	g10714.t1	OQV21255.1	XP_055334800.1, XP_055334801.1, XP_055334802.1, XP_055334803.1, XP_055334804.1	GAV08062.1
OG0001637	g11322.t1	OQV13384.1, OQV13385.1, OQV25844.1, OQV25845.1, OQV25850.1	XP_055342449.1	GAU88522.1
OG0001638	g11349.t1	OQV13808.1	XP_055331297.1, XP_055331298.1, XP_055331299.1	GAU87624.1, GAU87643.1, GAU87644.1
OG0001639	g11700.t1	OQV20309.1	XP_055337103.1, XP_055337104.1, XP_055337105.1, XP_055337107.1	GAU99456.1, GAU99457.1
OG0001640	g11710.t1	OQV19126.1	XP_055329077.1, XP_055329078.1, XP_055329079.1, XP_055329080.1	GAU98803.1, GAU98804.1
OG0001641	g11718.t1	OQV19144.1, OQV19146.1	XP_055329268.1, XP_055355423.1	GAU94377.1, GAU98834.1, GAV08769.1
OG0001642	g11724.t1	OQV19158.1, OQV19160.1	XP_055329330.1, XP_055329331.1, XP_055329333.1, XP_055329334.1	GAU98844.1
OG0001643	g11725.t1	OQV19161.1, OQV19162.1, OQV19163.1	XP_055329326.1, XP_055329328.1, XP_055329329.1	GAU98845.1
OG0001644	g11732.t1	OQV19175.1	XP_055329111.1, XP_055329112.1, XP_055329113.1, XP_055329114.1, XP_055329115.1	GAU98865.1
OG0001645	g12088.t1, g12088.t2	OQV13585.1, OQV15938.1	XP_055329667.1, XP_055351746.1	GAU99961.1, GAV06606.1
OG0001646	g12357.t1	OQV17452.1	XP_055345594.1, XP_055345596.1, XP_055345597.1	GAV03348.1, GAV03349.1, GAV03350.1
OG0001647	g12465.t1	OQV22485.1	XP_055335542.1, XP_055335543.1, XP_055335544.1, XP_055335545.1	GAU97629.1, GAV03357.1
OG0001648	g12848.t1, g14484.t1	OQV25037.1	XP_055348708.1, XP_055348709.1, XP_055348711.1, XP_055351366.1	GAU92952.1
OG0001649	g13892.t1	OQV25491.1, OQV25492.1	XP_055339521.1, XP_055339522.1, XP_055339523.1, XP_055339524.1	GAV06616.1
OG0001650	g13898.t1	OQV21210.1, OQV21212.1, OWA55125.1, OWA55127.1, OWA55128.1	XP_055339494.1	GAV05796.1
OG0001651	g13920.t1	OQV23777.1	XP_055339718.1, XP_055339719.1, XP_055339720.1, XP_055339721.1, XP_055339722.1	GAV05773.1
OG0001652	g13924.t1	OQV14478.1	XP_055356935.1, XP_055356942.1, XP_055356951.1, XP_055356959.1, XP_055356967.1	GAU94845.1
OG0001653	g14012.t1	OQV25366.1	XP_055327506.1, XP_055327507.1, XP_055332792.1, XP_055354890.1	GAU94114.1, GAV01903.1
OG0001654	g14029.t1	OQV24593.1	XP_055333049.1, XP_055333050.1, XP_055333051.1	GAU94257.1, GAU94258.1, GAU94259.1
OG0001655	g14979.t1	OQV25100.1, OQV25101.1, OQV25102.1, OQV25103.1	XP_055327758.1, XP_055327759.1	GAV02010.1
OG0001656	g15397.t1	OQV13748.1	XP_055333204.1, XP_055333205.1, XP_055333207.1, XP_055333208.1, XP_055333209.1	GAV00869.1
OG0001657	g160.t1	OQV11586.1, OQV19426.1, OWA54716.1, OWA54935.1	XP_055354629.1, XP_055354630.1	GAV07127.1
OG0001658	g654.t1	OWA51689.1, OWA53375.1	XP_055330031.1, XP_055330032.1, XP_055330916.1	GAU98496.1, GAV00623.1
OG0001659	g661.t1	OQV15110.1	XP_055336463.1, XP_055336471.1, XP_055336480.1, XP_055336491.1, XP_055336498.1	GAU98682.1
OG0001660	g757.t1	OQV12095.1, OQV12096.1, OWA52258.1	XP_055353053.1, XP_055353054.1	GAU91702.1, GAU91703.1
OG0001661	g1002.t1	OQV20145.1, OQV20146.1, OQV20147.1	XP_055330833.1, XP_055330839.1, XP_055330840.1	GAU97954.1
OG0001662	g1029.t1	OQV15738.1, OQV15739.1	XP_055345455.1, XP_055345456.1, XP_055345457.1	GAV04413.1, GAV04414.1
OG0001663	g1051.t1, g11030.t1, g8820.t1	OQV18558.1	XP_055328645.1, XP_055328646.1, XP_055328647.1	GAU99628.1
OG0001664	g2284.t1	OQV16679.1	XP_055337609.1, XP_055337610.1, XP_055337611.1, XP_055337612.1	GAU92864.1, GAU92865.1
OG0001665	g2289.t1, g8679.t1	OQV14434.1	XP_055327717.1, XP_055327719.1, XP_055327720.1, XP_055339405.1	GAV05739.1
OG0001666	g2382.t1	OQV13333.1	XP_055330257.1, XP_055330266.1, XP_055330274.1	GAU98466.1, GAU98467.1, GAU98468.1
OG0001667	g3197.t1	OQV12995.1	XP_055333609.1, XP_055333610.1, XP_055333611.1, XP_055333612.1	GAV07805.1, GAV07806.1
OG0001668	g3199.t1	OQV20722.1	XP_055354998.1, XP_055355006.1, XP_055355015.1, XP_055355023.1, XP_055355031.1	GAU95663.1
OG0001669	g3256.t1, g9507.t1	OQV13667.1, OQV13668.1, OQV13669.1, OQV13670.1	XP_055333215.1	GAU97100.1
OG0001670	g14125.t1, g3432.t1	OQV11904.1	XP_055329191.1, XP_055329198.1, XP_055329203.1	GAU98356.1, GAU98357.1
OG0001671	g3974.t1	OWA52312.1, OWA52313.1, OWA52314.1	XP_055334574.1, XP_055334575.1	GAU88017.1, GAU88022.1
OG0001672	g3975.t1	OQV23785.1, OQV23786.1	XP_055342392.1, XP_055342394.1, XP_055342395.1, XP_055342517.1	GAU90876.1
OG0001673	g4694.t1	OQV20192.1, OQV20193.1	XP_055329391.1, XP_055329392.1, XP_055329393.1, XP_055329394.1	GAV02386.1
OG0001674	g4775.t1	OWA50802.1	XP_055329467.1, XP_055329468.1, XP_055329470.1, XP_055329471.1, XP_055329472.1	GAV02211.1
OG0001675	g5134.t1, g5134.t2	OQV21445.1, OQV21446.1, OQV24942.1	XP_055341896.1, XP_055346480.1	GAU96253.1
OG0001676	g5140.t1	OQV21448.1, OQV21449.1	XP_055341897.1, XP_055341898.1, XP_055341899.1, XP_055341900.1	GAU96248.1
OG0001677	g5446.t1	OQV15698.1, OQV15699.1, OQV19804.1	XP_055333296.1, XP_055333297.1, XP_055333298.1	GAV00832.1
OG0001678	g5902.t1	OWA52445.1	XP_055333353.1	GAV08070.1, GAV08071.1, GAV08110.1, GAV10007.1, GAV10034.1
OG0001679	g11149.t1, g11150.t1, g11151.t1, g6168.t1	OQV15917.1, OQV15918.1	XP_055349058.1	GAU89786.1
OG0001680	g12287.t1, g6254.t1, g6255.t1	OQV22887.1	XP_055333100.1, XP_055333102.1, XP_055333103.1	GAU94678.1
OG0001681	g6275.t1, g6275.t2	OWA52150.1, OWA52151.1	XP_055341579.1	GAU95043.1, GAU95044.1, GAU95045.1
OG0001682	g6323.t1	OQV19196.1	XP_055329237.1, XP_055329238.1, XP_055329239.1, XP_055329241.1	GAU98889.1, GAU98890.1
OG0001683	g6562.t1	OQV16197.1, OQV18518.1	XP_055344163.1, XP_055351798.1, XP_055351801.1	GAU97663.1, GAV01451.1
OG0001684	g15168.t1, g6993.t1	OWA50677.1, OWA53463.1, OWA54289.1	XP_055352690.1, XP_055357946.1	GAU92728.1
OG0001685	g7700.t1	OQV11635.1	XP_055328903.1, XP_055330382.1, XP_055341643.1, XP_055341644.1, XP_055341646.1	GAU92729.1
OG0001686	g7704.t1	OQV16397.1	XP_055341604.1, XP_055341605.1, XP_055341606.1, XP_055341607.1, XP_055341608.1	GAU92717.1
OG0001687	g7836.t1		XP_055356192.1, XP_055356194.1, XP_055356195.1, XP_055356196.1, XP_055356197.1	GAV03699.1, GAV03700.1
OG0001688	g7859.t1	OWA51623.1, OWA51624.1, OWA51628.1, OWA51629.1, OWA51630.1	XP_055331676.1	GAU90960.1
OG0001689	g7865.t1	OWA51616.1	XP_055331467.1, XP_055331468.1, XP_055331469.1, XP_055331470.1	GAV09301.1, GAV09302.1
OG0001690	g7869.t1	OWA53616.1	XP_055331430.1, XP_055331431.1, XP_055331432.1, XP_055331433.1	GAV01807.1, GAV01808.1
OG0001691	g7923.t1, g7923.t2	OWA52000.1, OWA52001.1, OWA52002.1, OWA52003.1	XP_055351953.1	GAU89072.1
OG0001692	g8091.t1, g8094.t1, g8094.t2	OQV14865.1, OQV14866.1	XP_055352213.1	GAV09411.1, GAV09413.1
OG0001693	g2843.t1, g8279.t1	OQV23428.1, OQV23430.1, OQV23434.1, OQV23436.1	XP_055327363.1, XP_055327364.1
OG0001694	g8443.t1	OQV17139.1, OQV17140.1	XP_055339605.1, XP_055340081.1, XP_055340082.1, XP_055340083.1	GAU98704.1
OG0001695	g8746.t1	OQV20246.1, OQV20247.1	XP_055328609.1, XP_055328610.1, XP_055328611.1	GAV02422.1, GAV02423.1
OG0001696	g8782.t1, g8782.t2	OQV20520.1	XP_055333411.1, XP_055333412.1, XP_055333413.1	GAU97986.1, GAU97987.1
OG0001697	g8799.t1	OQV17319.1	XP_055348751.1, XP_055348759.1, XP_055348767.1	GAV08141.1, GAV08142.1, GAV08143.1
OG0001698	g5778.t1, g8834.t1, g8834.t2	OQV12758.1	XP_055341348.1	GAV02991.1, GAV02992.1, GAV02993.1
OG0001699	g9779.t1	OQV19921.1, OQV19922.1, OQV21671.1	XP_055334781.1, XP_055348960.1	GAU88133.1, GAU96494.1
OG0001700	g10094.t1, g10094.t2	OQV12301.1	XP_055327987.1	GAV08837.1, GAV08838.1, GAV08839.1, GAV08840.1
OG0001701	g10667.t1	OQV17514.1	XP_055342308.1, XP_055342309.1, XP_055342310.1, XP_055342311.1	GAU89163.1, GAU89165.1
OG0001702	g11168.t1, g14706.t1, g14706.t2, g14800.t1, g8256.t1			GAU91370.1, GAU91372.1, GAV09704.1
OG0001703	g12572.t1	OWA51808.1, OWA51809.1	XP_055329001.1, XP_055329003.1, XP_055329004.1, XP_055329005.1	GAV02070.1
OG0001704	g12576.t1, g12576.t2	OWA51805.1	XP_055328865.1, XP_055328866.1, XP_055350446.1, XP_055350447.1	GAV02074.1
OG0001705	g13367.t1	OQV21454.1	XP_055344082.1, XP_055344083.1, XP_055344084.1, XP_055344086.1, XP_055344087.1	GAU92902.1
OG0001706	g13548.t1	OQV20990.1, OQV20991.1	XP_055341148.1, XP_055341149.1, XP_055341150.1	GAU91129.1, GAU91130.1
OG0001707	g14078.t1	OQV14018.1, OQV14022.1	XP_055341695.1, XP_055355190.1, XP_055357840.1	GAU96844.1, GAU96847.1
OG0001708	g14913.t1	OWA52437.1, OWA52438.1, OWA52439.1	XP_055333199.1, XP_055333200.1	GAV08119.1, GAV08120.1
OG0001709	g15167.t1	OQV17920.1, OWA50774.1	XP_055331144.1, XP_055350869.1, XP_055350878.1, XP_055350886.1	GAV05600.1
OG0001710	g15671.t1	OQV24416.1	XP_055329232.1, XP_055329233.1, XP_055329234.1, XP_055329235.1	GAU98939.1, GAU98940.1
OG0001711	g14148.t1	OQV14076.1	XP_055328512.1, XP_055328513.1, XP_055328514.1, XP_055328515.1, XP_055328516.1	GAV05541.1
OG0001712	g14252.t1	OQV11652.1	XP_055338228.1, XP_055338237.1, XP_055338246.1, XP_055338253.1, XP_055338260.1	GAV03541.1
OG0001713	g1112.t1, g1112.t2	OWA52958.1, OWA52959.1, OWA52960.1, OWA52961.1	XP_055335185.1	GAU97682.1
OG0001714	g1170.t1	OWA52859.1	XP_055335139.1, XP_055335140.1, XP_055335141.1, XP_055335142.1, XP_055335143.1	GAU97772.1
OG0001715	g1173.t1	OWA52855.1	XP_055335129.1, XP_055335130.1, XP_055335131.1, XP_055335132.1, XP_055335133.1	GAU97777.1
OG0001716	g1195.t1	OQV11708.1, OQV11709.1	XP_055335110.1, XP_055335111.1, XP_055335112.1	GAU97804.1, GAU97805.1
OG0001717	g2176.t1	OWA49921.1	XP_055345921.1, XP_055345922.1	GAU89171.1, GAU89172.1, GAU90213.1, GAV01462.1
OG0001718	g3638.t1	OQV25317.1, OQV25318.1	XP_055328314.1, XP_055328315.1	GAV03940.1, GAV03941.1, GAV03942.1
OG0001719	g15767.t1, g6391.t1	OQV12061.1, OQV21155.1	XP_055329369.1, XP_055345725.1	GAV05856.1, GAV05901.1
OG0001720	g6411.t1	OQV21190.1, OQV21191.1, OQV21192.1, OQV21193.1	XP_055339482.1, XP_055343442.1	GAU95002.1
OG0001721	g6416.t1	OQV22245.1	XP_055345486.1	GAU88219.1, GAU90778.1, GAU90779.1, GAU90780.1, GAU90781.1
OG0001722	g6603.t1, g6603.t2	OQV20742.1	XP_055357947.1, XP_055357949.1, XP_055357950.1, XP_055357951.1	GAU95594.1
OG0001723	g6634.t1	OQV20707.1, OQV20920.1	XP_055333066.1, XP_055333068.1, XP_055357931.1	GAU91246.1, GAU95618.1
OG0001724	g6635.t1	OQV20704.1	XP_055357925.1, XP_055357926.1, XP_055357927.1, XP_055357929.1, XP_055357930.1	GAU95616.1
OG0001725	g6644.t1	OWA50600.1, OWA50602.1, OWA50603.1	XP_055357890.1	GAU90096.1, GAU90097.1, GAU95372.1
OG0001726	g6648.t1	OQV23763.1	XP_055336987.1, XP_055336988.1, XP_055336989.1, XP_055336991.1	GAU89026.1, GAU89029.1
OG0001727	g6835.t1	OQV13129.1	XP_055351173.1, XP_055351174.1, XP_055351175.1, XP_055351176.1	GAU91747.1, GAU91748.1
OG0001728	g6869.t1, g6869.t2	OQV20977.1	XP_055356386.1, XP_055356393.1, XP_055356402.1, XP_055356410.1	GAU91146.1
OG0001729	g7365.t1	OWA51586.1	XP_055349363.1, XP_055349364.1, XP_055349473.1, XP_055349474.1	GAU95793.1, GAU95794.1
OG0001730	g7527.t1, g7528.t1	OQV22092.1, OQV22094.1	XP_055336080.1	GAV03116.1, GAV03117.1, GAV03118.1
OG0001731	g7553.t1	OQV19232.1, OQV19233.1, OQV19234.1	XP_055336879.1, XP_055336887.1, XP_055336895.1	GAV03069.1
OG0001732	g7565.t1	OQV18575.1, OWA51015.1	XP_055327514.1, XP_055327515.1, XP_055328670.1	GAV01944.1, GAV02395.1
OG0001733	g7566.t1	OWA50059.1	XP_055333772.1, XP_055333777.1, XP_055333784.1, XP_055333793.1	GAV05479.1, GAV05480.1
OG0001734	g7571.t1, g7571.t2	OWA50075.1, OWA50076.1	XP_055340349.1, XP_055353643.1, XP_055353644.1	GAV07811.1
OG0001735	g7582.t1	OQV25400.1	XP_055327497.1, XP_055331111.1, XP_055331728.1, XP_055338837.1, XP_055338839.1	GAV01972.1
OG0001736	g9089.t1, g9089.t2	OQV21871.1, OQV21872.1	XP_055353961.1	GAU89368.1, GAU89369.1, GAU91514.1
OG0001737	g1243.t1, g9379.t1	OQV12146.1		GAU91508.1, GAV02810.1, GAV02813.1, GAV06623.1, GAV08316.1
OG0001738	g1563.t1, g9381.t1	OQV11885.1, OQV11886.1	XP_055342630.1, XP_055342639.1, XP_055346531.1	GAU96453.1
OG0001739	g10019.t1	OQV13510.1	XP_055329142.1, XP_055329143.1, XP_055329144.1	GAU95701.1, GAU95702.1, GAU95703.1
OG0001740	g10451.t1	OWA50907.1	XP_055339743.1, XP_055339744.1, XP_055339746.1, XP_055339747.1	GAV02952.1, GAV02953.1
OG0001741	g10992.t1	OQV21913.1	XP_055354479.1, XP_055355154.1	GAU88812.1, GAU88813.1, GAV09445.1, GAV09446.1
OG0001742	g11022.t1, g15093.t1, g2022.t1	OQV13782.1	XP_055346129.1, XP_055346130.1, XP_055346131.1	GAV00438.1
OG0001743	g11205.t1, g11206.t1, g14931.t1, g4270.t1, g4271.t1	OQV17076.1	XP_055335062.1, XP_055335064.1
OG0001744	g11948.t1, g14352.t1	OQV17169.1	XP_055331954.1, XP_055335303.1, XP_055335304.1, XP_055356733.1	GAV06854.1
OG0001745	g12786.t1	OQV22659.1	XP_055356832.1, XP_055356833.1, XP_055356834.1, XP_055356835.1, XP_055356836.1	GAV04649.1
OG0001746	g13325.t1, g13325.t2	OQV26194.1	XP_055344806.1, XP_055344807.1, XP_055344809.1, XP_055344810.1	GAU92516.1
OG0001747	g13327.t1	OWA51217.1	XP_055327262.1, XP_055327263.1, XP_055327265.1, XP_055327266.1, XP_055327267.1	GAV04965.1
OG0001748	g13330.t1	OWA51218.1	XP_055327258.1, XP_055327259.1, XP_055327260.1, XP_055327261.1, XP_055327361.1	GAU94971.1
OG0001749	g13424.t1	OWA50424.1, OWA50425.1	XP_055346562.1, XP_055348302.1, XP_055357940.1	GAV04781.1, GAV09066.1
OG0001750	g13719.t1, g13719.t2	OQV20168.1	XP_055329343.1, XP_055329344.1, XP_055329345.1, XP_055329346.1	GAV02361.1
OG0001751	g13826.t1	OQV15688.1	XP_055327839.1, XP_055344909.1, XP_055346069.1, XP_055357928.1, XP_055357937.1	GAV06928.1
OG0001752	g14102.t1	OQV11774.1, OQV11775.1	XP_055342160.1, XP_055342161.1, XP_055342162.1	GAU93808.1, GAU93809.1
OG0001753	g14363.t1, g14363.t2	OQV23283.1, OQV25975.1	XP_055337584.1, XP_055337586.1, XP_055337587.1	GAU92834.1
OG0001754	g15330.t1	OQV18512.1, OQV22293.1	XP_055329419.1, XP_055331460.1, XP_055338939.1	GAU99011.1, GAV05305.1
OG0001755	g15464.t1	OQV14292.1, OQV14293.1, OQV14294.1	XP_055337696.1, XP_055337697.1, XP_055337698.1	GAU92681.1
OG0001756	g15481.t1	OWA50659.1, OWA54099.1	XP_055337565.1, XP_055337566.1, XP_055337567.1, XP_055337568.1	GAU92752.1
OG0001757	g81.t1	OQV14662.1, OQV14663.1	XP_055329285.1, XP_055341777.1	GAV02299.1, GAV02300.1, GAV02301.1
OG0001758	g11051.t1, g11052.t1, g11053.t1, g11054.t1, g211.t1, g6125.t1, g9874.t1, g9875.t1
OG0001759	g215.t1	OQV14795.1	XP_055340065.1, XP_055340066.1, XP_055340067.1, XP_055340068.1, XP_055340069.1	GAV07893.1
OG0001760	g402.t1	OWA53392.1	XP_055354556.1, XP_055354557.1, XP_055354558.1, XP_055354560.1, XP_055354561.1, XP_055354562.1
OG0001761	g412.t1	OQV12788.1	XP_055345380.1, XP_055345381.1, XP_055345422.1, XP_055354537.1, XP_055354538.1	GAV02666.1
OG0001762	g436.t1	OQV12824.1, OQV25902.1, OWA55287.1, OWA55652.1	XP_055347317.1, XP_055347318.1	GAV02628.1
OG0001763	g912.t1		XP_055340094.1, XP_055340095.1, XP_055340096.1, XP_055345420.1, XP_055346386.1	GAU97351.1, GAU97352.1
OG0001764	g1363.t1	OQV23696.1, OQV23697.1	XP_055337923.1, XP_055337924.1, XP_055337926.1, XP_055337927.1	GAU89066.1
OG0001765	g1423.t1	OQV12829.1, OQV12831.1, OQV12832.1	XP_055347236.1, XP_055347237.1, XP_055347238.1	GAV02620.1
OG0001766	g1433.t1	OQV12838.1, OWA54790.1	XP_055350573.1, XP_055350574.1, XP_055350575.1	GAV02604.1, GAV02605.1
OG0001767	g1455.t1	OQV16409.1	XP_055351632.1, XP_055351633.1, XP_055356439.1	GAV02547.1, GAV02548.1, GAV02549.1
OG0001768	g1499.t1	OQV14690.1, OWA52455.1, OWA52456.1	XP_055342880.1, XP_055356317.1	GAU96515.1, GAU96516.1
OG0001769	g1610.t1	OQV12273.1, OQV23466.1	XP_055341731.1, XP_055349389.1	GAU95405.1, GAU95888.1, GAU95893.1
OG0001770	g1615.t1	OQV16224.1, OQV16225.1, OQV25385.1	XP_055346662.1, XP_055346663.1	GAV02042.1, GAV02980.1
OG0001771	g1730.t1, g1730.t2, g1730.t3	OQV25054.1	XP_055351348.1, XP_055351349.1, XP_055351350.1	GAV08682.1
OG0001772	g1772.t1	OWA52041.1	XP_055336472.1, XP_055336473.1, XP_055336474.1, XP_055341403.1	GAU99156.1, GAU99157.1
OG0001773	g1867.t1, g1878.t1	OQV11711.1, OQV11712.1, OQV24086.1, OQV24092.1	XP_055347534.1	GAU94869.1
OG0001774	g10657.t1, g2094.t1	OWA52803.1	XP_055327428.1	GAU95306.1, GAU95307.1, GAU95308.1, GAV08535.1
OG0001775	g2416.t1		XP_055341159.1, XP_055341160.1, XP_055341161.1, XP_055341162.1, XP_055341163.1, XP_055341434.1	GAU99038.1
OG0001776	g2614.t1	OQV25771.1	XP_055338828.1, XP_055338829.1, XP_055338830.1, XP_055339003.1, XP_055339004.1	GAU88462.1
OG0001777	g2634.t1, g2634.t2	OQV25806.1	XP_055330960.1, XP_055330961.1, XP_055330962.1, XP_055330963.1	GAU88498.1
OG0001778	g2670.t1	OQV13344.1, OQV13345.1, OQV13346.1	XP_055351158.1, XP_055351159.1, XP_055351160.1	GAU99894.1
OG0001779	g2699.t1	OWA51957.1	XP_055345626.1, XP_055345631.1	GAU89961.1, GAU89962.1, GAU89963.1, GAU89964.1
OG0001780	g2825.t1	OWA52979.1	XP_055339637.1, XP_055339638.1, XP_055339639.1, XP_055339640.1, XP_055339641.1	GAV03068.1
OG0001781	g2858.t1	OQV16153.1	XP_055346607.1, XP_055346608.1, XP_055346609.1, XP_055346610.1	GAV01223.1, GAV01224.1
OG0001782	g3042.t1	OWA49951.1, OWA49952.1, OWA49955.1	XP_055347494.1, XP_055347532.1, XP_055347561.1	GAV01679.1
OG0001783	g3070.t1	OQV21715.1	XP_055343031.1, XP_055343033.1, XP_055343034.1, XP_055343035.1, XP_055343036.1	GAV03845.1
OG0001784	g3482.t1	OQV19591.1, OWA50140.1	XP_055347055.1	GAU93058.1, GAU98942.1, GAU98943.1, GAU98944.1
OG0001785	g3483.t1	OQV19095.1, OQV19593.1	XP_055347022.1, XP_055347023.1, XP_055347024.1	GAU93059.1, GAV02888.1
OG0001786	g3484.t1, g3484.t2	OQV19594.1, OQV19619.1	XP_055342682.1, XP_055342683.1	GAU93060.1, GAU93065.1
OG0001787	g3487.t1, g3487.t2	OQV11528.1	XP_055333330.1, XP_055333636.1, XP_055333638.1, XP_055333639.1	GAV08884.1
OG0001788	g3492.t1	OQV21963.1	XP_055338089.1, XP_055338090.1, XP_055338091.1, XP_055338092.1, XP_055357345.1	GAU88862.1
OG0001789	g3721.t1	OQV12822.1	XP_055351703.1, XP_055351704.1, XP_055351705.1, XP_055351706.1, XP_055351707.1	GAV06527.1
OG0001790	g3769.t1	OQV12197.1, OQV21961.1	XP_055348551.1, XP_055348557.1, XP_055348830.1	GAU88851.1, GAU88852.1
OG0001791	g3895.t1	OQV17778.1	XP_055334740.1, XP_055334747.1, XP_055334757.1, XP_055334765.1, XP_055334774.1	GAU98142.1
OG0001792	g3896.t1	OWA52949.1, OWA52950.1	XP_055334205.1, XP_055334213.1, XP_055334219.1	GAU98145.1, GAU98146.1
OG0001793	g4183.t1	OQV20460.1	XP_055333404.1, XP_055333405.1, XP_055333406.1, XP_055333407.1, XP_055333409.1	GAU98539.1
OG0001794	g4254.t1, g4264.t1	OQV12030.1	XP_055341126.1, XP_055345539.1, XP_055357018.1	GAU89067.1, GAU90827.1
OG0001795	g4589.t1	OQV22026.1, OQV22027.1	XP_055343636.1, XP_055343637.1	GAV03187.1, GAV03188.1, GAV03189.1
OG0001796	g4680.t1	OWA53316.1	XP_055334916.1, XP_055334917.1	GAU87826.1, GAU87827.1, GAV10048.1, GAV10053.1
OG0001797	g4874.t1	OQV15424.1, OQV15426.1, OQV23352.1	XP_055336502.1, XP_055336503.1, XP_055336504.1	GAV01866.1
OG0001798	g4877.t1	OQV17723.1	XP_055357749.1, XP_055357750.1, XP_055357751.1, XP_055357752.1, XP_055357753.1	GAU95538.1
OG0001799	g5955.t1	OQV13944.1	XP_055336181.1, XP_055336182.1, XP_055336183.1, XP_055336184.1	GAU87175.1, GAU87176.1
OG0001800	g6206.t1, g6206.t2	OQV14047.1	XP_055341556.1, XP_055341557.1, XP_055341558.1	GAV06618.1, GAV06619.1
OG0001801	g6971.t1	OWA52353.1	XP_055333031.1, XP_055333837.1, XP_055334626.1, XP_055335440.1, XP_055345349.1	GAU99779.1
OG0001802	g6984.t1, g6984.t2	OQV18316.1, OQV18317.1	XP_055347523.1, XP_055347524.1	GAV01762.1, GAV01763.1
OG0001803	g7682.t1	OQV22568.1, OQV22569.1, OWA55482.1	XP_055354524.1, XP_055354525.1	GAV04691.1, GAV04692.1
OG0001804	g12818.t1, g8037.t1	OQV17628.1	XP_055327989.1, XP_055327990.1, XP_055327991.1, XP_055357562.1	GAV09079.1
OG0001805	g8267.t1	OQV14771.1	XP_055342898.1, XP_055342899.1, XP_055342901.1, XP_055342902.1	GAV07865.1, GAV07866.1
OG0001806	g8561.t1	OQV22161.1	XP_055328517.1, XP_055328518.1, XP_055328520.1, XP_055328521.1, XP_055328522.1	GAV05631.1
OG0001807	g8652.t1	OQV15745.1	XP_055329303.1, XP_055329304.1, XP_055329305.1, XP_055329306.1	GAV02110.1, GAV02111.1
OG0001808	g8968.t1	OQV14989.1, OWA51385.1, OWA52718.1, OWA55535.1, OWA55651.1		GAV06882.1, GAV06883.1
OG0001809	g8973.t1	OQV11639.1	XP_055341037.1, XP_055341038.1, XP_055341039.1	GAU93323.1, GAU93324.1, GAU93325.1
OG0001810	g9010.t1	OQV17794.1, OQV17795.1, OWA55703.1	XP_055333002.1, XP_055333010.1, XP_055333019.1	GAU98122.1
OG0001811	g9056.t1, g9056.t2	OQV17365.1, OQV17373.1, OWA50131.1	XP_055346894.1, XP_055346994.1	GAV02763.1
OG0001812	g9288.t1	OQV14806.1	XP_055331337.1, XP_055331338.1, XP_055331339.1, XP_055331340.1	GAU90969.1, GAU90970.1
OG0001813	g9354.t1	OQV24708.1	XP_055331856.1, XP_055331859.1, XP_055331860.1, XP_055331861.1, XP_055331862.1	GAV07387.1
OG0001814	g9611.t1	OQV13308.1, OWA49769.1, OWA49770.1, OWA49771.1	XP_055342798.1, XP_055342806.1	GAU98437.1
OG0001815	g9685.t1, g9687.t1, g9689.t1	OQV14041.1	XP_055341397.1, XP_055341398.1	GAV09328.1, GAV09329.1
OG0001816	g9861.t1, g9862.t1	OWA49845.1, OWA49846.1, OWA54989.1	XP_055330936.1, XP_055330937.1	GAU90879.1
OG0001817	g10060.t1	OQV14068.1	XP_055341392.1, XP_055341393.1, XP_055341394.1, XP_055341395.1, XP_055341396.1	GAU88253.1
OG0001818	g10280.t1	OQV23958.1	XP_055342932.1, XP_055342933.1, XP_055342934.1, XP_055342935.1, XP_055342936.1, XP_055353738.1
OG0001819	g10553.t1, g3410.t1, g3410.t2	OQV24014.1	XP_055352520.1, XP_055352584.1, XP_055352661.1	GAV03028.1
OG0001820	g10554.t1	OQV18324.1	XP_055333796.1	GAU91924.1, GAU95077.1, GAU95079.1, GAU98528.1, GAU99997.1
OG0001821	g10972.t1	OQV14202.1, OQV14251.1, OQV14253.1, OWA50656.1	XP_055340485.1, XP_055353150.1	GAV04829.1
OG0001822	g11282.t2, g12377.t1, g12378.t1, g14585.t1	OQV16840.1	XP_055337271.1	GAV03903.1, GAV07154.1
OG0001823	g11368.t1, g11891.t1	OQV11645.1	XP_055341602.1, XP_055341603.1	GAU90935.1, GAU90936.1, GAU96385.1
OG0001824	g11664.t1	OWA52816.1, OWA52817.1	XP_055357969.1	GAV08516.1, GAV08517.1, GAV08518.1, GAV08519.1
OG0001825	g12283.t1	OQV24754.1	XP_055346375.1, XP_055346376.1, XP_055346377.1, XP_055346379.1	GAU97293.1, GAU97294.1
OG0001826	g12503.t1	OQV24962.1	XP_055340628.1, XP_055340637.1, XP_055340646.1, XP_055340654.1, XP_055340662.1	GAV03603.1
OG0001827	g12507.t1	OQV21819.1, OQV21820.1, OQV21821.1, OQV21822.1	XP_055332802.1	GAV03596.1, GAV07161.1
OG0001828	g12705.t1	OQV15793.1, OQV15794.1	XP_055343650.1, XP_055343658.1, XP_055343669.1	GAV08364.1, GAV08365.1
OG0001829	g13092.t1	OQV13032.1	XP_055340224.1, XP_055357237.1	GAU87194.1, GAU87195.1, GAU87196.1, GAU87197.1
OG0001830	g13283.t1	OQV25086.1, OQV25089.1	XP_055339629.1, XP_055339630.1, XP_055339631.1, XP_055339632.1	GAV04332.1
OG0001831	g13664.t1	OQV23828.1	XP_055342903.1, XP_055342904.1	GAU93161.1, GAU93162.1, GAU93163.1, GAU93164.1
OG0001832	g13787.t1	OQV15190.1	XP_055336170.1, XP_055336171.1, XP_055336172.1, XP_055336173.1, XP_055336175.1	GAU89211.1
OG0001833	g13984.t1	OQV23936.1, OQV23937.1	XP_055342813.1, XP_055353760.1	GAU93306.1, GAU93307.1, GAU93308.1
OG0001834	g14782.t1	OQV18311.1	XP_055332086.1, XP_055332087.1, XP_055332088.1, XP_055332089.1	GAU97492.1, GAU97493.1
OG0001835	g14790.t1	OWA50030.1, OWA55654.1	XP_055341458.1, XP_055341459.1, XP_055341460.1, XP_055341461.1	GAU87264.1
OG0001836	g14877.t1	OQV17176.1	XP_055340042.1, XP_055340043.1, XP_055340044.1, XP_055340045.1, XP_055340046.1	GAV07780.1
OG0001837	g15223.t1	OWA50106.1	XP_055333699.1, XP_055333700.1, XP_055333701.1, XP_055348777.1	GAU94482.1, GAU94483.1
OG0001838	g179.t1	OQV20859.1, OWA50850.1	XP_055327462.1, XP_055327463.1, XP_055327464.1, XP_055327465.1	GAV09651.1
OG0001839	g1581.t1	OQV19057.1, OQV19058.1	XP_055346841.1, XP_055346842.1	GAV02767.1, GAV02768.1, GAV02769.1
OG0001840	g1985.t1	OWA52520.1	XP_055343917.1	GAU90564.1, GAU99296.1, GAV00800.1, GAV09592.1, GAV09764.1
OG0001841		OQV12108.1, OQV12109.1, OQV14744.1, OQV14745.1, OQV20615.1, OQV22005.1	XP_055343217.1	GAU88940.1
OG0001842		OQV12274.1	XP_055341296.1, XP_055341297.1, XP_055341300.1, XP_055341301.1, XP_055341302.1, XP_055341303.1	GAV07341.1
OG0001843		OQV12656.1, OQV15781.1, OQV15782.1, OWA52751.1, OWA55586.1	XP_055351976.1, XP_055351977.1, XP_055351978.1
OG0001844		OQV13087.1	XP_055328393.1, XP_055328394.1, XP_055328395.1	GAU94374.1, GAU94375.1, GAU94376.1, GAV05872.1
OG0001845		OQV14055.1, OQV14056.1, OQV14057.1, OQV14060.1, OWA50775.1, OWA50776.1, OWA51887.1, OWA53035.1
OG0001846		OQV14369.1, OQV18233.1, OQV20876.1, OWA52342.1, OWA52996.1, OWA55097.1, OWA55718.1		GAV09810.1
OG0001847		OQV14869.1, OQV14892.1, OQV14893.1		GAU96983.1, GAV00619.1, GAV06845.1, GAV06846.1, GAV06898.1
OG0001848		OQV14951.1, OQV14963.1, OQV14964.1, OQV14965.1, OQV16348.1, OWA55519.1	XP_055327390.1, XP_055357913.1
OG0001849		OQV14992.1, OQV14995.1, OQV15025.1, OQV15048.1, OQV15049.1, OQV15050.1, OQV15060.1, OQV15061.1
OG0001850		OQV15165.1, OQV15166.1, OQV15167.1, OQV15168.1, OQV15169.1, OQV17079.1, OQV17080.1, OWA49988.1
OG0001851		OQV15475.1, OQV15476.1	XP_055354826.1, XP_055354827.1, XP_055354828.1	GAV00296.1, GAV00297.1, GAV00298.1
OG0001852		OQV16115.1	XP_055338463.1, XP_055338465.1, XP_055338466.1, XP_055338467.1, XP_055338468.1, XP_055338469.1	GAV08325.1
OG0001853		OQV16150.1, OQV22963.1, OQV22964.1, OWA53183.1, OWA54825.1, OWA55498.1	XP_055329584.1, XP_055345049.1
OG0001854		OQV16743.1, OQV16744.1, OQV16745.1, OQV16746.1, OQV16747.1, OQV16748.1		GAU91405.1, GAU91407.1
OG0001855		OQV16867.1, OQV16870.1	XP_055336662.1, XP_055337188.1	GAV02177.1, GAV06211.1, GAV06212.1, GAV06213.1
OG0001856		OQV16993.1, OQV18079.1, OQV18080.1, OQV18082.1, OQV21567.1, OQV26201.1, OWA50675.1, OWA52210.1
OG0001857		OQV17350.1	XP_055355282.1, XP_055355289.1, XP_055355298.1, XP_055355304.1, XP_055355313.1, XP_055355323.1	GAU96162.1
OG0001858		OQV17357.1, OWA53722.1, OWA54226.1		GAU89206.1, GAU89900.1, GAU90688.1, GAU91357.1, GAU91358.1
OG0001859		OQV17779.1	XP_055346285.1, XP_055346446.1, XP_055346447.1, XP_055346448.1, XP_055346449.1	GAV03072.1, GAV03095.1
OG0001860		OQV18356.1	XP_055333798.1, XP_055333799.1, XP_055333800.1, XP_055333801.1, XP_055333803.1	GAU91786.1, GAU91787.1
OG0001861		OQV19783.1, OQV19784.1, OQV19787.1, OWA50900.1, OWA55646.1	XP_055327287.1, XP_055327288.1, XP_055327289.1
OG0001862		OQV21379.1	XP_055341530.1, XP_055341531.1, XP_055341532.1, XP_055341533.1, XP_055342350.1	GAU91776.1, GAU96310.1
OG0001863		OQV21636.1	XP_055342388.1, XP_055342389.1, XP_055342390.1	GAU88316.1, GAU88317.1, GAU88318.1, GAU88319.1
OG0001864		OQV21717.1, OQV21718.1, OWA55695.1	XP_055336034.1, XP_055336035.1, XP_055336240.1, XP_055341941.1	GAV03782.1
OG0001865		OQV21836.1, OQV22674.1, OQV22675.1, OQV22676.1, OQV22677.1, OQV22679.1, OQV22680.1, OWA50112.1
OG0001866		OQV22698.1, OQV23432.1, OQV24050.1, OWA51504.1, OWA55394.1	XP_055346308.1	GAU89422.1, GAU99994.1
OG0001867		OQV23601.1, OQV23602.1	XP_055331806.1, XP_055331807.1, XP_055331808.1, XP_055331809.1, XP_055335461.1	GAU88764.1
OG0001868		OQV23803.1, OQV23804.1	XP_055337396.1, XP_055337397.1, XP_055337398.1, XP_055337399.1, XP_055337400.1	GAU91021.1
OG0001869		OQV25722.1, OWA51949.1	XP_055338932.1, XP_055340963.1, XP_055340964.1, XP_055340965.1, XP_055346132.1, XP_055357133.1
OG0001870		OWA51030.1	XP_055339069.1, XP_055339173.1, XP_055343804.1, XP_055356409.1, XP_055356411.1	GAV04836.1, GAV04837.1
OG0001871		OWA51290.1	XP_055341035.1, XP_055356290.1	GAU89287.1, GAU89943.1, GAU91530.1, GAU97619.1, GAV08112.1
OG0001872		OWA53609.1, OWA54046.1, OWA54048.1, OWA55732.1	XP_055343978.1, XP_055343979.1	GAV04795.1, GAV04796.1
OG0001873		OWA53780.1, OWA53781.1, OWA54068.1, OWA54075.1, OWA54925.1, OWA54926.1, OWA54929.1, OWA54930.1
OG0001874		OWA53785.1, OWA54597.1		GAU89439.1, GAU89440.1, GAU99814.1, GAU99815.1, GAV07371.1, GAV07372.1
OG0001875		OWA54487.1	XP_055344600.1, XP_055344724.1, XP_055350896.1, XP_055350904.1, XP_055350912.1, XP_055352980.1, XP_055356559.1
OG0001876			XP_055327624.1, XP_055327967.1, XP_055327978.1, XP_055328041.1, XP_055328217.1, XP_055355322.1, XP_055356130.1, XP_055357768.1
OG0001877			XP_055327970.1, XP_055331390.1, XP_055331391.1, XP_055331392.1, XP_055331393.1, XP_055351260.1, XP_055351281.1, XP_055351283.1
OG0001878			XP_055328262.1, XP_055330901.1, XP_055331245.1, XP_055345804.1, XP_055348325.1, XP_055348590.1, XP_055350051.1, XP_055350408.1
OG0001879			XP_055329094.1, XP_055329095.1, XP_055329096.1, XP_055329097.1, XP_055329098.1, XP_055329099.1, XP_055329100.1, XP_055329101.1
OG0001880			XP_055329590.1, XP_055329814.1, XP_055335942.1, XP_055335947.1, XP_055335951.1, XP_055347303.1, XP_055347304.1, XP_055355491.1
OG0001881			XP_055329632.1, XP_055329634.1, XP_055350661.1, XP_055350662.1, XP_055350695.1, XP_055350696.1, XP_055350697.1, XP_055350698.1
OG0001882			XP_055329756.1, XP_055329757.1, XP_055329770.1, XP_055350309.1, XP_055350349.1, XP_055350350.1, XP_055350351.1, XP_055350352.1
OG0001883			XP_055329916.1, XP_055329957.1, XP_055329958.1, XP_055332187.1, XP_055332214.1, XP_055347997.1, XP_055349955.1, XP_055354788.1
OG0001884			XP_055329940.1, XP_055330419.1, XP_055337917.1, XP_055340939.1, XP_055349489.1, XP_055351591.1, XP_055351881.1, XP_055356158.1
OG0001885			XP_055330520.1, XP_055335080.1, XP_055350407.1, XP_055350413.1, XP_055356278.1, XP_055356279.1, XP_055356280.1, XP_055356596.1
OG0001886			XP_055330647.1, XP_055330648.1, XP_055330649.1, XP_055330650.1, XP_055330651.1, XP_055330684.1, XP_055330685.1, XP_055330686.1
OG0001887			XP_055330701.1, XP_055331715.1, XP_055331716.1, XP_055331717.1, XP_055334698.1, XP_055334770.1, XP_055339502.1, XP_055351513.1
OG0001888			XP_055331821.1, XP_055331972.1, XP_055354539.1, XP_055354540.1, XP_055354541.1, XP_055354542.1, XP_055354543.1, XP_055354544.1
OG0001889			XP_055331928.1, XP_055331933.1, XP_055331934.1, XP_055331935.1, XP_055331936.1, XP_055331937.1, XP_055331938.1, XP_055332064.1
OG0001890			XP_055332285.1, XP_055339805.1, XP_055339806.1, XP_055341958.1, XP_055341962.1, XP_055347449.1, XP_055357330.1, XP_055357331.1
OG0001891			XP_055333995.1, XP_055333996.1, XP_055333997.1, XP_055333999.1, XP_055334000.1, XP_055334001.1, XP_055334004.1, XP_055357040.1
OG0001892			XP_055334990.1, XP_055339287.1, XP_055344227.1, XP_055345382.1, XP_055345383.1, XP_055347987.1, XP_055349541.1, XP_055349620.1
OG0001893			XP_055336548.1, XP_055340998.1, XP_055352588.1, XP_055353423.1, XP_055357534.1, XP_055357535.1, XP_055357536.1, XP_055357537.1
OG0001894			XP_055336783.1, XP_055344379.1, XP_055347350.1, XP_055354839.1, XP_055354840.1, XP_055355189.1, XP_055355622.1, XP_055357266.1
OG0001895			XP_055337057.1, XP_055337058.1, XP_055343062.1, XP_055343170.1, XP_055351821.1, XP_055352093.1, XP_055352173.1, XP_055354332.1
OG0001896			XP_055337297.1, XP_055351497.1, XP_055356954.1, XP_055356955.1, XP_055356956.1, XP_055356966.1	GAV06779.1, GAV06788.1
OG0001897			XP_055337523.1, XP_055337524.1, XP_055337525.1, XP_055337526.1, XP_055337527.1, XP_055337528.1, XP_055337529.1, XP_055337531.1
OG0001898			XP_055337920.1, XP_055348567.1, XP_055348571.1, XP_055348572.1, XP_055349766.1, XP_055349949.1, XP_055356457.1, XP_055356459.1
OG0001899			XP_055338205.1, XP_055338206.1, XP_055338207.1, XP_055338208.1, XP_055338209.1, XP_055338210.1, XP_055338211.1, XP_055345271.1
OG0001900			XP_055339099.1, XP_055339152.1, XP_055339227.1, XP_055344947.1, XP_055344948.1, XP_055344949.1, XP_055344969.1, XP_055344970.1
OG0001901			XP_055339360.1, XP_055344308.1, XP_055344309.1, XP_055347590.1, XP_055347615.1, XP_055352583.1, XP_055352587.1, XP_055354438.1
OG0001902			XP_055342180.1, XP_055342192.1, XP_055342193.1, XP_055342194.1, XP_055342195.1, XP_055354986.1, XP_055354988.1, XP_055354989.1
OG0001903			XP_055344074.1, XP_055344075.1, XP_055344076.1, XP_055344077.1, XP_055344078.1, XP_055348954.1, XP_055349298.1, XP_055354313.1
OG0001904			XP_055344805.1, XP_055354382.1, XP_055355082.1, XP_055356566.1, XP_055356567.1, XP_055357472.1, XP_055357473.1, XP_055357474.1
OG0001905			XP_055344811.1, XP_055344814.1, XP_055349131.1, XP_055349181.1, XP_055349205.1, XP_055349206.1, XP_055349209.1, XP_055349210.1
OG0001906			XP_055346896.1, XP_055346897.1, XP_055346899.1, XP_055346900.1, XP_055346901.1, XP_055349037.1, XP_055355664.1	GAV02503.1
OG0001907			XP_055347096.1, XP_055347097.1, XP_055347098.1, XP_055347120.1, XP_055347123.1, XP_055347177.1, XP_055353218.1, XP_055353234.1
OG0001908			XP_055347670.1, XP_055347673.1, XP_055347674.1, XP_055347793.1, XP_055347794.1, XP_055347795.1, XP_055347796.1, XP_055347798.1
OG0001909			XP_055348543.1, XP_055348544.1, XP_055348545.1, XP_055348546.1, XP_055354441.1, XP_055354442.1, XP_055354444.1, XP_055354445.1
OG0001910			XP_055348577.1, XP_055348580.1, XP_055352024.1, XP_055354450.1, XP_055354451.1, XP_055355158.1, XP_055355165.1, XP_055355166.1
OG0001911			XP_055348991.1, XP_055348992.1, XP_055348993.1, XP_055348994.1, XP_055356387.1, XP_055356388.1, XP_055356389.1, XP_055356396.1
OG0001912			XP_055349500.1, XP_055349501.1, XP_055349515.1, XP_055349516.1, XP_055349517.1, XP_055349519.1, XP_055349520.1, XP_055349549.1
OG0001913			XP_055349606.1, XP_055349607.1, XP_055349608.1, XP_055349609.1, XP_055349610.1, XP_055349611.1, XP_055349612.1, XP_055349618.1
OG0001914			XP_055349613.1, XP_055349614.1, XP_055349615.1, XP_055349617.1, XP_055350372.1, XP_055350373.1, XP_055350374.1, XP_055350375.1
OG0001915			XP_055349770.1, XP_055349772.1, XP_055349828.1, XP_055349829.1, XP_055349830.1, XP_055349831.1, XP_055349832.1, XP_055349833.1
OG0001916			XP_055350672.1, XP_055350678.1, XP_055350679.1, XP_055350680.1, XP_055350681.1, XP_055350685.1, XP_055350690.1, XP_055350691.1
OG0001917			XP_055350822.1, XP_055350823.1, XP_055350824.1, XP_055350826.1, XP_055350827.1, XP_055350828.1, XP_055350829.1, XP_055350897.1
OG0001918			XP_055351058.1, XP_055351059.1, XP_055351136.1, XP_055351148.1, XP_055351149.1, XP_055351150.1, XP_055354931.1, XP_055354932.1
OG0001919			XP_055352055.1, XP_055353479.1, XP_055353480.1, XP_055353481.1, XP_055353483.1, XP_055355613.1, XP_055355614.1, XP_055355615.1
OG0001920			XP_055352494.1, XP_055352495.1, XP_055352496.1, XP_055352497.1, XP_055352498.1, XP_055352499.1, XP_055352500.1	GAV04664.1
OG0001921				GAU87449.1, GAU94978.1, GAU94979.1, GAU94980.1, GAU95285.1, GAV06314.1, GAV09831.1, GAV09832.1
OG0001922				GAU87679.1, GAU87681.1, GAV01430.1, GAV04505.1, GAV09884.1, GAV09885.1, GAV09922.1, GAV10087.1
OG0001923				GAU89310.1, GAU92513.1, GAU94734.1, GAU94735.1, GAU97397.1, GAU97398.1, GAV09606.1, GAV09607.1
OG0001924				GAU89932.1, GAU89939.1, GAU89940.1, GAU89941.1, GAU89946.1, GAU89947.1, GAU90160.1, GAU90161.1
OG0001925				GAU90489.1, GAU90680.1, GAU90989.1, GAV01278.1, GAV01676.1, GAV01678.1, GAV08735.1, GAV08736.1
OG0001926				GAU90895.1, GAU90916.1, GAU91727.1, GAU91882.1, GAU92419.1, GAU92951.1, GAU95558.1, GAU95583.1
OG0001927				GAU99979.1, GAU99983.1, GAU99985.1, GAU99986.1, GAU99987.1, GAU99988.1, GAU99989.1, GAU99990.1
OG0001928				GAV00476.1, GAV00477.1, GAV00480.1, GAV00481.1, GAV00482.1, GAV07034.1, GAV07402.1, GAV07403.1
OG0001929				GAV02884.1, GAV04517.1, GAV04526.1, GAV07024.1, GAV07026.1, GAV09618.1, GAV10008.1, GAV10019.1
OG0001930	g3062.t1, g3371.t1, g7496.t1, g7805.t1	OWA50129.1	XP_055335157.1	GAU95199.1
OG0001931		OQV13249.1, OQV20684.1, OQV25851.1, OWA52426.1, OWA53997.1, OWA55059.1, OWA55214.1
OG0001932				GAU94174.1, GAV01732.1, GAV03056.1, GAV06417.1, GAV06957.1, GAV07125.1, GAV08017.1
OG0001933	g11212.t1, g12251.t1, g12989.t1, g581.t1			GAU87846.1, GAV05089.1, GAV09686.1
OG0001934		OQV16958.1, OQV16959.1, OQV19481.1, OQV25971.1, OWA53706.1, OWA53709.1		GAV08319.1
OG0001935	g1225.t1, g13052.t1	OQV21435.1, OWA51523.1, OWA51524.1, OWA51525.1	XP_055337108.1
OG0001936		OQV12710.1, OQV13747.1, OQV17557.1, OQV17558.1, OQV17878.1, OQV17879.1, OQV17880.1
OG0001937	g13055.t1		XP_055332059.1, XP_055332060.1, XP_055341563.1, XP_055356992.1	GAV07091.1, GAV07092.1
OG0001938	g10132.t1, g1819.t1	OQV13368.1	XP_055342545.1, XP_055342546.1, XP_055342566.1, XP_055342647.1
OG0001939	g5445.t1	OQV15693.1, OQV15696.1, OWA49916.1	XP_055333420.1, XP_055333421.1	GAV00831.1
OG0001940	g5959.t1		XP_055327344.1	GAU87271.1, GAU90398.1, GAU90401.1, GAU97104.1, GAV06910.1
OG0001941		OQV12414.1, OQV13201.1, OQV14724.1, OQV15353.1, OQV15714.1, OQV20604.1		GAU90449.1
OG0001942	g8172.t1	OQV11811.1, OQV11820.1, OWA49790.1	XP_055327270.1, XP_055327271.1	GAV02471.1
OG0001943	g11017.t1, g11018.t1, g11752.t1, g7944.t1	OQV21473.1		GAU96210.1, GAU96211.1
OG0001944	g13830.t1, g13834.t1, g5313.t1	OQV17715.1	XP_055355663.1	GAU92307.1, GAV08166.1
OG0001945	g2759.t1, g2759.t2	OQV12392.1	XP_055329640.1, XP_055332133.1, XP_055340898.1, XP_055349268.1
OG0001946	g5300.t1, g5702.t1, g5704.t1		XP_055327372.1, XP_055336092.1, XP_055341377.1, XP_055356412.1
OG0001947	g10963.t1, g12718.t1, g12985.t1, g14806.t1, g5504.t1	OQV20215.1	XP_055329547.1
OG0001948	g12721.t1, g3789.t1, g3790.t1	OWA50644.1		GAU99773.1, GAV01487.1, GAV02786.1
OG0001949	g6588.t1		XP_055329698.1, XP_055343218.1, XP_055348465.1, XP_055355792.1, XP_055356599.1	GAV01486.1
OG0001950	g15762.t1, g15765.t1, g3262.t1, g6137.t1	OQV11445.1	XP_055333542.1	GAU97198.1
OG0001951	g12319.t1, g14384.t1, g15729.t1, g15731.t1, g4137.t1, g6157.t1	OQV17576.1
OG0001952	g14063.t1	OQV13258.1, OWA50294.1, OWA51552.1, OWA51553.1	XP_055338569.1, XP_055342572.1
OG0001953	g11119.t1, g4764.t1, g725.t1, g8584.t1	OQV16899.1, OQV16907.1		GAV02196.1
OG0001954	g13332.t1	OQV23551.1	XP_055356227.1, XP_055356235.1	GAV05106.1, GAV05107.1, GAV05108.1
OG0001955	g15160.t1, g15160.t2	OQV13055.1	XP_055341075.1, XP_055341076.1	GAU91559.1, GAU91560.1
OG0001956	g10781.t1	OQV24424.1	XP_055332957.1	GAU93954.1, GAU94291.1, GAV07410.1, GAV08706.1
OG0001957	g3397.t1, g4787.t1, g9722.t1	OQV15308.1	XP_055334980.1, XP_055344196.1	GAV01827.1
OG0001958	g9155.t3	OQV14968.1, OQV14969.1	XP_055342229.1, XP_055342230.1, XP_055342231.1	GAU93894.1
OG0001959	g12863.t1	OQV11863.1, OWA55057.1	XP_055332040.1, XP_055332041.1, XP_055332043.1	GAU99233.1
OG0001960	g3650.t1		XP_055328291.1, XP_055328292.1, XP_055328293.1, XP_055328294.1, XP_055328295.1	GAV03984.1
OG0001961	g14809.t1	OQV20659.1	XP_055355179.1, XP_055357976.1	GAU95760.1, GAU95761.1, GAU95762.1
OG0001962	g15251.t1, g4869.t1, g4870.t1		XP_055332527.1, XP_055354221.1, XP_055354229.1	GAU95766.1
OG0001963	g2237.t1, g2237.t2	OWA51646.1, OWA51647.1	XP_055346827.1	GAV01089.1, GAV01090.1
OG0001964	g8160.t1	OQV18061.1	XP_055343238.1, XP_055343239.1, XP_055343240.1, XP_055343241.1	GAV00616.1
OG0001965	g2748.t1	OQV19280.1, OQV19281.1	XP_055332364.1, XP_055332366.1	GAU90050.1, GAU90051.1
OG0001966	g15634.t1	OQV14213.1, OQV14215.1	XP_055331414.1, XP_055331415.1, XP_055334327.1	GAU87266.1
OG0001967	g2224.t1, g2870.t1, g4162.t1	OQV25545.1	XP_055335782.1	GAU92719.1, GAU92720.1
OG0001968	g4820.t1	OQV13472.1, OQV19091.1	XP_055334477.1, XP_055346872.1	GAU88110.1, GAU88111.1
OG0001969	g7587.t1, g7587.t2	OQV25405.1, OQV25406.1	XP_055328093.1	GAV01990.1, GAV01991.1
OG0001970	g5354.t1	OQV19650.1, OQV19651.1	XP_055332099.1, XP_055332100.1, XP_055343019.1	GAU93110.1
OG0001971	g7789.t1, g8608.t1	OQV12257.1, OQV12264.1, OQV12267.1		GAU95878.1, GAU95879.1
OG0001972	g3818.t1	OQV19788.1, OQV19789.1, OQV19790.1	XP_055327290.1, XP_055327291.1	GAU95093.1
OG0001973	g3818.t2, g8524.t1	OQV17355.1	XP_055336464.1, XP_055336465.1	GAV01824.1, GAV01825.1
OG0001974	g14747.t1	OWA50574.1	XP_055351648.1, XP_055351687.1	GAV06395.1, GAV06396.1, GAV06411.1
OG0001975	g268.t1, g8260.t1	OQV13433.1	XP_055334666.1	GAU88046.1, GAU88047.1, GAU88151.1
OG0001976	g12502.t1	OQV21289.1	XP_055340676.1, XP_055340684.1, XP_055340693.1, XP_055340700.1	GAV01209.1
OG0001977	g8997.t1	OQV16275.1	XP_055333211.1, XP_055333212.1, XP_055333213.1	GAU87459.1, GAU87460.1
OG0001978	g1681.t1	OQV24650.1	XP_055333022.1, XP_055333023.1, XP_055333024.1	GAU94171.1, GAU94172.1
OG0001979	g260.t1	OQV14178.1, OQV14182.1, OQV14183.1	XP_055334515.1	GAU87880.1, GAU87881.1
OG0001980	g8319.t1, g8319.t2	OQV21647.1, OQV21648.1	XP_055338950.1, XP_055352543.1	GAU88355.1
OG0001981	g13143.t1	OQV19106.1	XP_055328853.1, XP_055328854.1, XP_055328855.1, XP_055328856.1	GAU98789.1
OG0001982			XP_055346335.1, XP_055346336.1, XP_055348464.1	GAU89429.1, GAU89430.1, GAU89431.1, GAV08054.1
OG0001983	g15107.t1, g2542.t1, g6670.t1	OQV25776.1	XP_055348626.1, XP_055348627.1	GAV05469.1
OG0001984	g9166.t1	OQV14944.1, OQV14945.1	XP_055333059.1	GAU93916.1, GAU93917.1, GAU93918.1
OG0001985	g5578.t1	OQV13947.1	XP_055334919.1, XP_055334920.1, XP_055334921.1	GAU91269.1, GAU96746.1
OG0001986	g12371.t1	OQV14139.1, OQV14140.1, OWA54855.1	XP_055334599.1, XP_055334600.1	GAU87966.1
OG0001987	g14319.t1		XP_055338821.1, XP_055338822.1, XP_055338823.1, XP_055338824.1, XP_055338825.1, XP_055346560.1
OG0001988	g2740.t1	OQV25889.1, OQV25890.1, OQV25891.1	XP_055350635.1	GAU94368.1, GAU94369.1
OG0001989	g4334.t1, g4335.t1		XP_055342391.1	GAU92768.1, GAU92769.1, GAU95480.1, GAV01552.1
OG0001990	g3711.t1		XP_055341267.1, XP_055341268.1, XP_055341551.1	GAU96004.1, GAU96005.1, GAU96006.1
OG0001991	g11617.t1, g11629.t1, g2127.t1	OWA52272.1	XP_055345881.1, XP_055345883.1	GAV03619.1
OG0001992	g10488.t1, g11602.t1, g11604.t1, g11609.t1, g1290.t1, g845.t1			GAV09539.1
OG0001993	g270.t1, g9490.t1	OQV13437.1, OQV13438.1, OQV21846.1	XP_055344332.1	GAU88053.1
OG0001994	g629.t1	OQV16235.1, OQV16244.1, OWA50557.1	XP_055328472.1	GAV03487.1, GAV06980.1
OG0001995	g2955.t1	OWA53835.1, OWA53836.1, OWA53837.1	XP_055331478.1	GAU94179.1, GAV09067.1
OG0001996	g4043.t1		XP_055345145.1, XP_055354812.1, XP_055354813.1, XP_055354814.1	GAU99179.1, GAV00100.1
OG0001997	g4406.t1	OQV24118.1	XP_055354159.1, XP_055354160.1, XP_055354161.1	GAV06965.1, GAV06966.1
OG0001998	g6506.t1	OQV17675.1	XP_055345540.1, XP_055345541.1, XP_055345542.1, XP_055345543.1	GAV05443.1
[truncated: 11,420 more rows]
